# Supplementary material
Source: MDPI journal article supplement (https://www.mdpi.com/2073-4352/12/9/1251)

## checkCIF/PLATON report

Structure factors have been supplied for datablock(s) siv71

THIS REPORT IS FOR GUIDANCE ONLY. IF USED AS PART OF A REVIEW PROCEDURE FOR PUBLICATION, IT SHOULD NOT REPLACE THE EXPERTISE OF AN EXPERIENCED CRYSTALLOGRAPHIC REFEREE.

No syntax errors found.      CIF dictionary      Interpreting this report

### Datablock: siv71

---

Bond precision:      C-C = 0.0087 Å      Wavelength=0.71073

Cell:                      a=15.1995(3)              b=15.1995(3)              c=24.6019(7)  
                                alpha=90              beta=90              gamma=90

Temperature:              120 K

|                        | Calculated               | Reported                                  |
|------------------------|--------------------------|-------------------------------------------|
| Volume                 | 5683.7(3)                | 5683.6(3)                                 |
| Space group            | P 41 21 2                | P 41 21 2                                 |
| Hall group             | P 4abw 2nw               | P 4abw 2nw                                |
| Moiety formula         | C10 H30 B18 Cl4 Co Cs O2 | (C4 H18 B18 Cl4 Co) -,Cs +,<br>2(C3 H6 O) |
| Sum formula            | C10 H30 B18 Cl4 Co Cs O2 | C10 H30 B18 Cl4 Co Cs O2                  |
| Mr                     | 710.56                   | 710.56                                    |
| Dx, g cm <sup>-3</sup> | 1.661                    | 1.661                                     |
| Z                      | 8                        | 8                                         |
| Mu (mm <sup>-1</sup> ) | 2.255                    | 2.255                                     |
| F000                   | 2768.0                   | 2768.0                                    |
| F000'                  | 2772.93                  |                                           |
| h,k,lmax               | 19,19,31                 | 19,19,31                                  |
| Nref                   | 6083[ 3503]              | 6074                                      |
| Tmin,Tmax              | 0.979,0.987              | 0.938,0.987                               |
| Tmin'                  | 0.973                    |                                           |

Correction method= # Reported T Limits: Tmin=0.938 Tmax=0.987  
AbsCorr = MULTI-SCAN

Data completeness= 1.73/1.00      Theta(max)= 26.777

R(reflections)= 0.0311( 5678)

wR2(reflections)=  
0.0772( 6074)

S = 1.051

Npar= 330

---

The following ALERTS were generated. Each ALERT has the format

**test-name\_ALERT\_alert-type\_alert-level.**

Click on the hyperlinks for more details of the test.

---

### ● Alert level C

|                   |                                                 |              |
|-------------------|-------------------------------------------------|--------------|
| PLAT042_ALERT_1_C | Calc. and Reported MoietyFormula Strings Differ | Please Check |
| PLAT220_ALERT_2_C | NonSolvent Resd 1 C Ueq(max)/Ueq(min) Range     | 4.4 Ratio    |
| PLAT222_ALERT_3_C | NonSolvent Resd 1 H Uiso(max)/Uiso(min) Range   | 5.9 Ratio    |
| PLAT242_ALERT_2_C | Low 'MainMol' Ueq as Compared to Neighbors of   | C4S Check    |
| PLAT342_ALERT_3_C | Low Bond Precision on C-C Bonds .....           | 0.00867 Ang. |
| PLAT911_ALERT_3_C | Missing FCF Refl Between Thmin & STh/L= 0.600   | 10 Report    |
| PLAT971_ALERT_2_C | Check Calcd Resid. Dens. 0.73Ang From Cs2       | 1.60 eA-3    |
| PLAT975_ALERT_2_C | Check Calcd Resid. Dens. 0.87Ang From O1S .     | 0.56 eA-3    |

---

### ● Alert level G

FORMU01\_ALERT\_1\_G There is a discrepancy between the atom counts in the  
\_chemical\_formula\_sum and \_chemical\_formula\_moiety. This is  
usually due to the moiety formula being in the wrong format.  
Atom count from \_chemical\_formula\_sum: C10 H30 B18 Cl4 Co1 Cs1 O2  
Atom count from \_chemical\_formula\_moiety:C6 H12 Cs1 O2

|                   |                                                  |             |
|-------------------|--------------------------------------------------|-------------|
| PLAT004_ALERT_5_G | Polymeric Structure Found with Maximum Dimension | 3 Info      |
| PLAT083_ALERT_2_G | SHELXL Second Parameter in WGHT Unusually Large  | 13.59 Why ? |
| PLAT112_ALERT_2_G | ADDSYM Detects New (Pseudo) Symm. Elem c/2       | 94 %Fit     |
| PLAT343_ALERT_2_G | Unusual sp? Angle Range in Main Residue for      | C1 Check    |
| PLAT343_ALERT_2_G | Unusual sp? Angle Range in Main Residue for      | C1' Check   |
| PLAT343_ALERT_2_G | Unusual sp? Angle Range in Main Residue for      | C2 Check    |
| PLAT343_ALERT_2_G | Unusual sp? Angle Range in Main Residue for      | C2' Check   |
| PLAT367_ALERT_2_G | Long? C(sp?)-C(sp?) Bond C1 - C2 .               | 1.62 Ang.   |
| PLAT367_ALERT_2_G | Long? C(sp?)-C(sp?) Bond C1' - C2' .             | 1.62 Ang.   |
| PLAT412_ALERT_2_G | Short Intra XH3 .. XHn H2SC ..H4 .               | 2.10 Ang.   |
|                   | 3/2-y,-1/2+x,1/4+z =                             | 3_645 Check |
| PLAT720_ALERT_4_G | Number of Unusual/Non-Standard Labels .....      | 12 Note     |
| PLAT764_ALERT_4_G | Overcomplete CIF Bond List Detected (Rep/Expd) . | 1.18 Ratio  |
| PLAT774_ALERT_1_G | Check X-Y Bond in CIF: Cs1 --Cs2 ..              | 4.44 Ang.   |
| PLAT779_ALERT_4_G | Suspect or Irrelevant (Bond) Angle(s) in CIF ... | 44.50 Deg.  |
|                   | O1S -C1S -CS1 1_555 1_555 1_555 .....            | # 480 Check |
| PLAT910_ALERT_3_G | Missing # of FCF Reflection(s) Below Theta(Min). | 1 Note      |
| PLAT933_ALERT_2_G | Number of HKL-OMIT Records in Embedded .res File | 11 Note     |
| PLAT978_ALERT_2_G | Number C-C Bonds with Positive Residual Density. | 0 Info      |

---

0 **ALERT level A** = Most likely a serious problem - resolve or explain  
0 **ALERT level B** = A potentially serious problem, consider carefully  
8 **ALERT level C** = Check. Ensure it is not caused by an omission or oversight  
18 **ALERT level G** = General information/check it is not something unexpected

3 ALERT type 1 CIF construction/syntax error, inconsistent or missing data  
15 ALERT type 2 Indicator that the structure model may be wrong or deficient  
4 ALERT type 3 Indicator that the structure quality may be low  
3 ALERT type 4 Improvement, methodology, query or suggestion  
1 ALERT type 5 Informative message, check

---

It is advisable to attempt to resolve as many as possible of the alerts in all categories. Often the minor alerts point to easily fixed oversights, errors and omissions in your CIF or refinement strategy, so attention to these fine details can be worthwhile. In order to resolve some of the more serious problems it may be necessary to carry out additional measurements or structure refinements. However, the purpose of your study may justify the reported deviations and the more serious of these should normally be commented upon in the discussion or experimental section of a paper or in the "special\_details" fields of the CIF. checkCIF was carefully designed to identify outliers and unusual parameters, but every test has its limitations and alerts that are not important in a particular case may appear. Conversely, the absence of alerts does not guarantee there are no aspects of the results needing attention. It is up to the individual to critically assess their own results and, if necessary, seek expert advice.

### **Publication of your CIF in IUCr journals**

A basic structural check has been run on your CIF. These basic checks will be run on all CIFs submitted for publication in IUCr journals (*Acta Crystallographica*, *Journal of Applied Crystallography*, *Journal of Synchrotron Radiation*); however, if you intend to submit to *Acta Crystallographica Section C* or *E* or *IUCrData*, you should make sure that full publication checks are run on the final version of your CIF prior to submission.

### **Publication of your CIF in other journals**

Please refer to the *Notes for Authors* of the relevant journal for any special instructions relating to CIF submission.

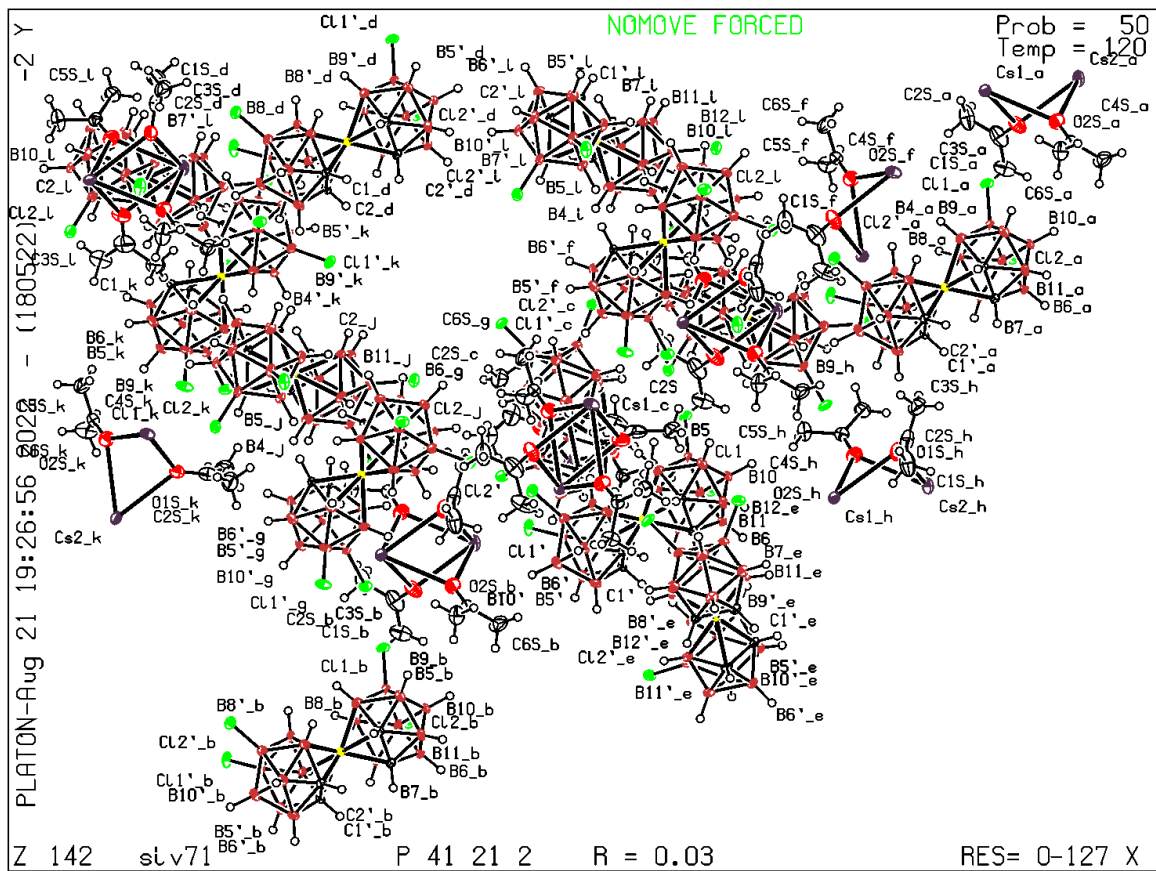

Supplement: s1 [file s1 › checkcif_5.pdf]
