# Supplementary material
Source: MDPI journal article supplement (https://www.mdpi.com/2073-4352/12/9/1251)
Supplement: s1 [file s1]

Archive with 7 entries (7 files):
- Compound 3.cif
- Compound 5.cif
- checkcif_2.pdf
- checkcif_3.pdf
- checkcif_5.pdf
- Chloro-Carboranes_SI_rev.pdf
- Compound 2.cif
