# Supplementary material
Source: MDPI journal article supplement (https://www.mdpi.com/2073-4352/12/9/1251)
Supplement: s1 [file s1 › Chloro-Carboranes_SI_rev.pdf]

# SUPPORTING INFORMATION

## Synthesis, Crystal Structure, and Some Transformations of 9,12-Dichloro-*ortho*-carborane

Sergey A. Anufriev <sup>1</sup>, Sergey V. Timofeev <sup>1</sup>, Olga B. Zhidkova <sup>1</sup>, Kyrill Yu. Suponitsky <sup>1,2</sup> and Igor B. Sivaev <sup>1,2\*</sup>

<sup>1</sup> A.N. Nesmeyanov Institute of Organoelement Compounds, Russian Academy of Science, 28 Vavilov Street, 119991 Moscow, Russia; truman476@mail.ru (S.A.A.); timofeev@ineos.ac.ru (S.V.T.); d.zolga57@mail.ru O.B.Z.); kirshik@yahoo.com (K.Y.S.); sivaev@ineos.ac.ru (I.B.S.)

<sup>2</sup> Basic Department of Chemistry of Innovative Materials and Technologies, G.V. Plekhanov Russian University of Economics, 36 Stremyannyi Line, 117997 Moscow, Russia

\* Correspondence: sivaev@ineos.ac.ru

|                                                                         |           |
|-------------------------------------------------------------------------|-----------|
| Crystallographic data for compounds <b>2</b> , <b>3</b> , and <b>5'</b> | <b>2</b>  |
| Crystal packing of compound <b>5'</b>                                   | <b>3</b>  |
| NMR spectra of compound <b>1</b>                                        | <b>4</b>  |
| Mass spectrum of compound <b>1</b>                                      | <b>10</b> |
| NMR spectra of compound <b>2</b>                                        | <b>11</b> |
| Mass spectrum of compound <b>2</b>                                      | <b>17</b> |
| NMR spectra of compound <b>3</b>                                        | <b>18</b> |
| Mass spectrum of compound <b>3</b>                                      | <b>24</b> |
| NMR spectra of compound <b>4</b>                                        | <b>25</b> |
| Mass spectrum of compound <b>4</b>                                      | <b>31</b> |
| NMR spectra of compound <b>5</b>                                        | <b>32</b> |
| Mass spectrum of compound <b>5</b>                                      | <b>38</b> |
| NMR spectra of compound <b>6</b>                                        | <b>39</b> |
| Mass spectrum of compound <b>6</b>                                      | <b>45</b> |

Table S1. Crystallographic data for compounds **2**, **3**, and **5'**.

|                                                                                       | <b>Compound 2</b>                                              | <b>Compound 3</b>                                             | <b>Compound 5'</b>                                                                                                                |
|---------------------------------------------------------------------------------------|----------------------------------------------------------------|---------------------------------------------------------------|-----------------------------------------------------------------------------------------------------------------------------------|
| formula                                                                               | C <sub>2</sub> H <sub>10</sub> B <sub>10</sub> Cl <sub>2</sub> | C <sub>2</sub> H <sub>9</sub> B <sub>10</sub> Cl <sub>3</sub> | C <sub>4</sub> H <sub>18</sub> B <sub>18</sub> Cl <sub>4</sub> Co <sup>-</sup> Cs <sup>+</sup> 2(C <sub>3</sub> H <sub>6</sub> O) |
| fw                                                                                    | 213.10                                                         | 247.54                                                        | 710.56                                                                                                                            |
| crystal system                                                                        | Orthorhombic                                                   | Monoclinic                                                    | Tetragonal                                                                                                                        |
| space group                                                                           | <i>Pna</i> 2 <sub>1</sub>                                      | <i>Cc</i>                                                     | <i>P4</i> <sub>1</sub> 2 <sub>1</sub> 2                                                                                           |
| <i>a</i> , Å                                                                          | 12.6461(7)                                                     | 12.5845(9)                                                    | 15.1995(3)                                                                                                                        |
| <i>b</i> , Å                                                                          | 7.1946(4)                                                      | 7.0519(5)                                                     | 15.1995(3)                                                                                                                        |
| <i>c</i> , Å                                                                          | 11.4596(7)                                                     | 13.8263(10)                                                   | 24.6019(7)                                                                                                                        |
| $\beta$ , deg.                                                                        | 90                                                             | 113.098(3)                                                    | 90                                                                                                                                |
| <i>V</i> , Å <sup>3</sup>                                                             | 1042.64(10)                                                    | 1128.65(14)                                                   | 5683.6(3)                                                                                                                         |
| <i>Z</i>                                                                              | 4                                                              | 4                                                             | 8                                                                                                                                 |
| $\rho_{\text{calc}}$ , g·cm <sup>-3</sup>                                             | 1.358                                                          | 1.457                                                         | 1.661                                                                                                                             |
| <i>F</i> (000)                                                                        | 424                                                            | 488                                                           | 2768                                                                                                                              |
| $\mu$ , mm <sup>-1</sup>                                                              | 0.557                                                          | 0.754                                                         | 2.255                                                                                                                             |
| $\theta$ range, deg.                                                                  | 3.22 – 28.84                                                   | 3.20 – 26.03                                                  | 1.90 – 26.78                                                                                                                      |
| reflections collected                                                                 | 11782                                                          | 5298                                                          | 74784                                                                                                                             |
| independent reflections / <i>R</i> <sub>int</sub>                                     | 2715/0.0282                                                    | 2197/0.0246                                                   | 6074/0.0376                                                                                                                       |
| Completeness to theta $\theta$ , %                                                    | 100                                                            | 100                                                           | 99.7                                                                                                                              |
| refined parameters                                                                    | 167                                                            | 178                                                           | 330                                                                                                                               |
| <i>GOF</i> ( <i>F</i> <sup>2</sup> )                                                  | 1.103                                                          | 1.124                                                         | 1.051                                                                                                                             |
| reflections with <i>I</i> > 2 $\sigma$ ( <i>I</i> )                                   | 2548                                                           | 2116                                                          | 5678                                                                                                                              |
| <i>R</i> <sub>1</sub> ( <i>F</i> ) ( <i>I</i> > 2 $\sigma$ ( <i>I</i> )) <sup>a</sup> | 0.0220                                                         | 0.0296                                                        | 0.0311                                                                                                                            |
| <i>wR</i> <sub>2</sub> ( <i>F</i> <sup>2</sup> ) (all data) <sup>b</sup>              | 0.0562                                                         | 0.0700                                                        | 0.0772                                                                                                                            |
| Largest diff. peak/hole, e·Å <sup>-3</sup>                                            | 0.145/-0.256                                                   | 0.266/-0.269                                                  | 1.290/-0.847                                                                                                                      |

<sup>a</sup>  $R_1 = \sum |F_o - |F_c|| / \sum (F_o)$ ; <sup>b</sup>  $wR_2 = (\sum [w(F_o^2 - F_c^2)^2] / \sum [w(F_o^2)^2])^{1/2}$

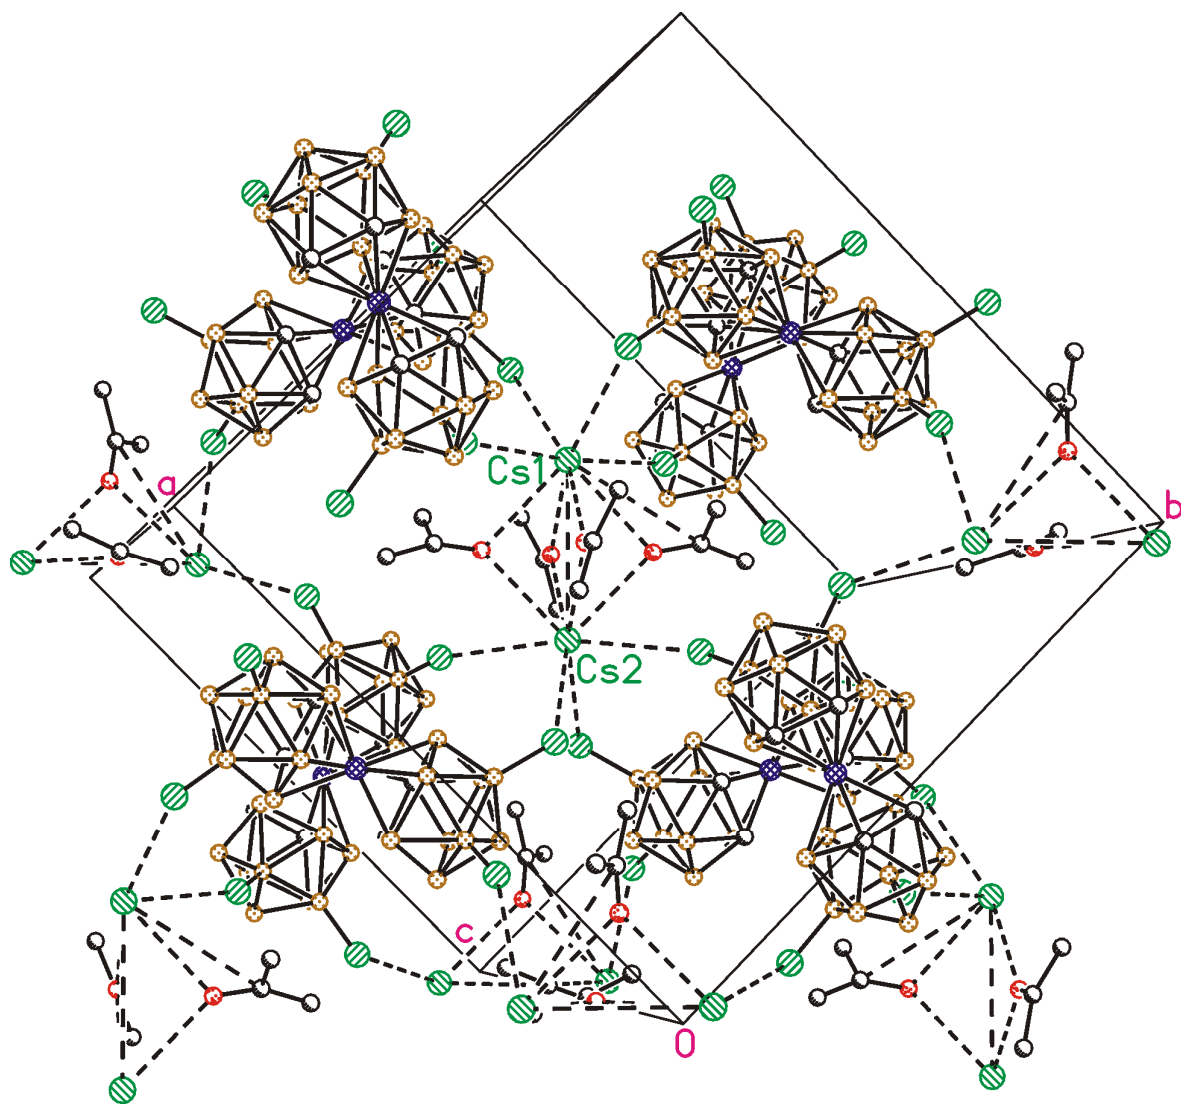

**Figure S1.** Crystal packing of  $\text{Cs}[9,9',12,12'\text{-Cl}_4\text{-}3,3'\text{-Co}(1,2\text{-C}_2\text{B}_9\text{H}_9)_2]\cdot 2\text{Me}_2\text{CO}$  (5').

Compound 1, 1H

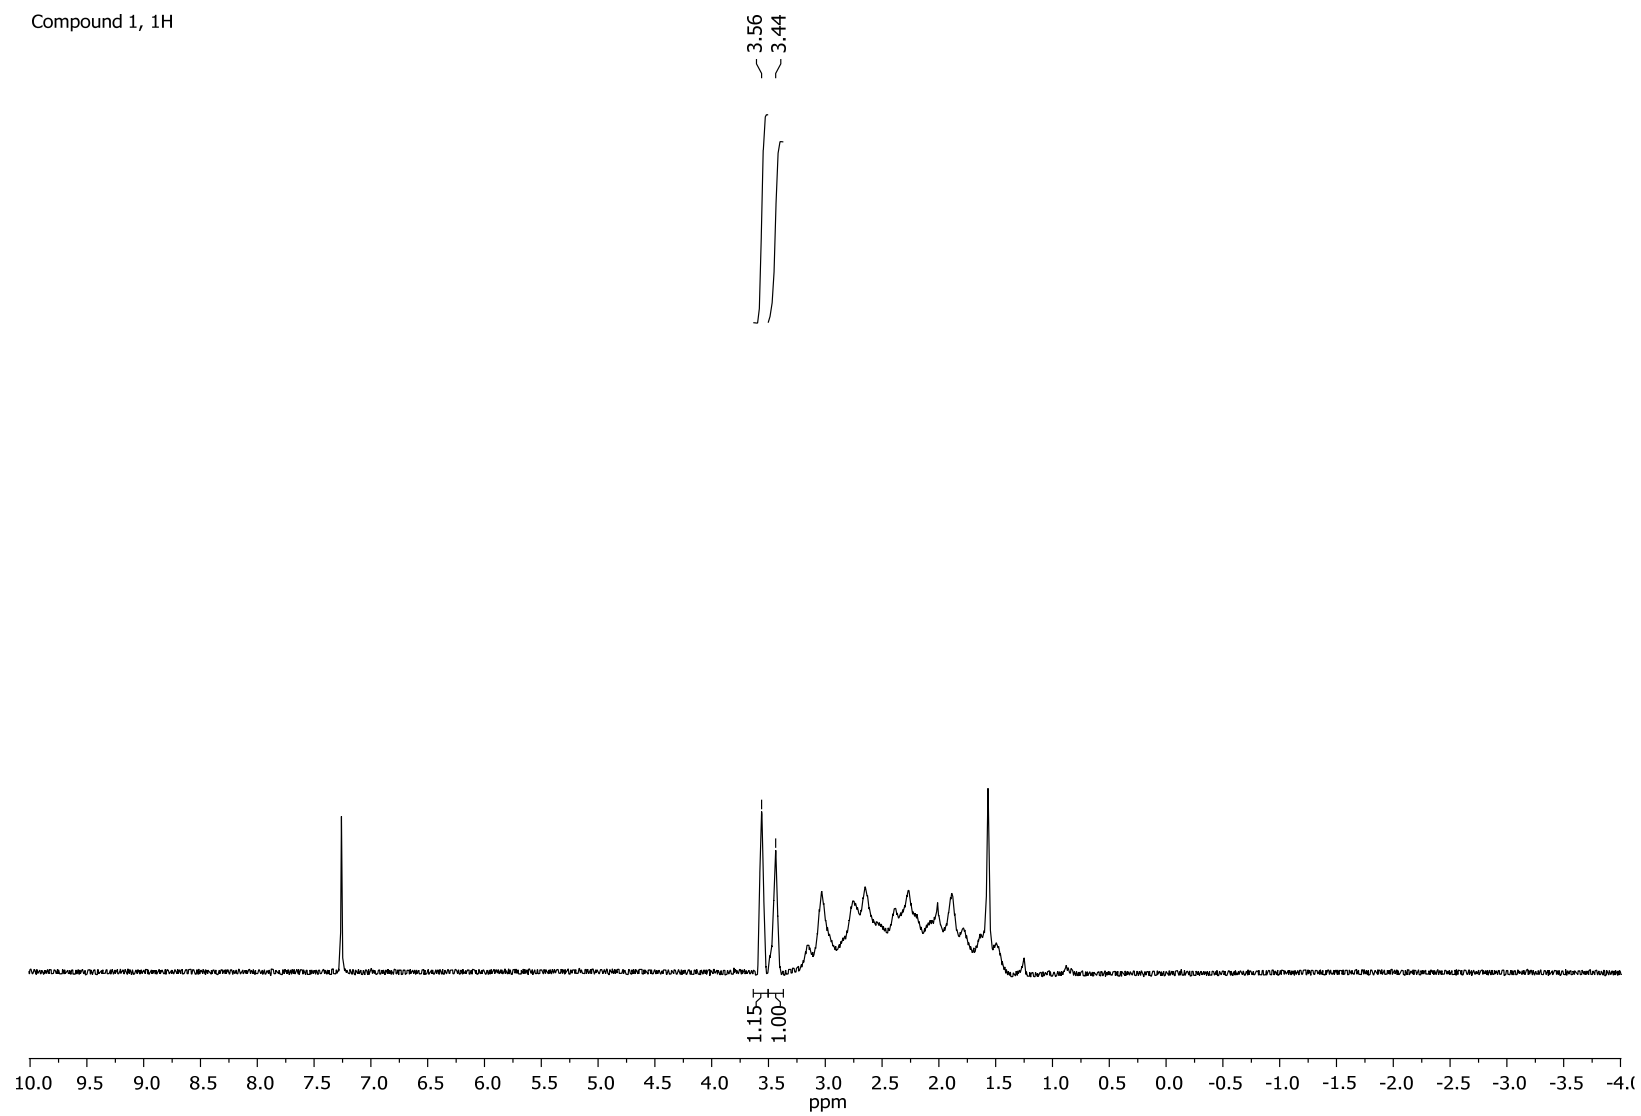

**Figure S1.**  $^1\text{H}$  NMR spectrum of 9-Cl-1,2- $\text{C}_2\text{B}_{10}\text{H}_{11}$  in  $\text{CDCl}_3$ .

Compound 1,  $^{11}\text{B}\{^1\text{H}\}$

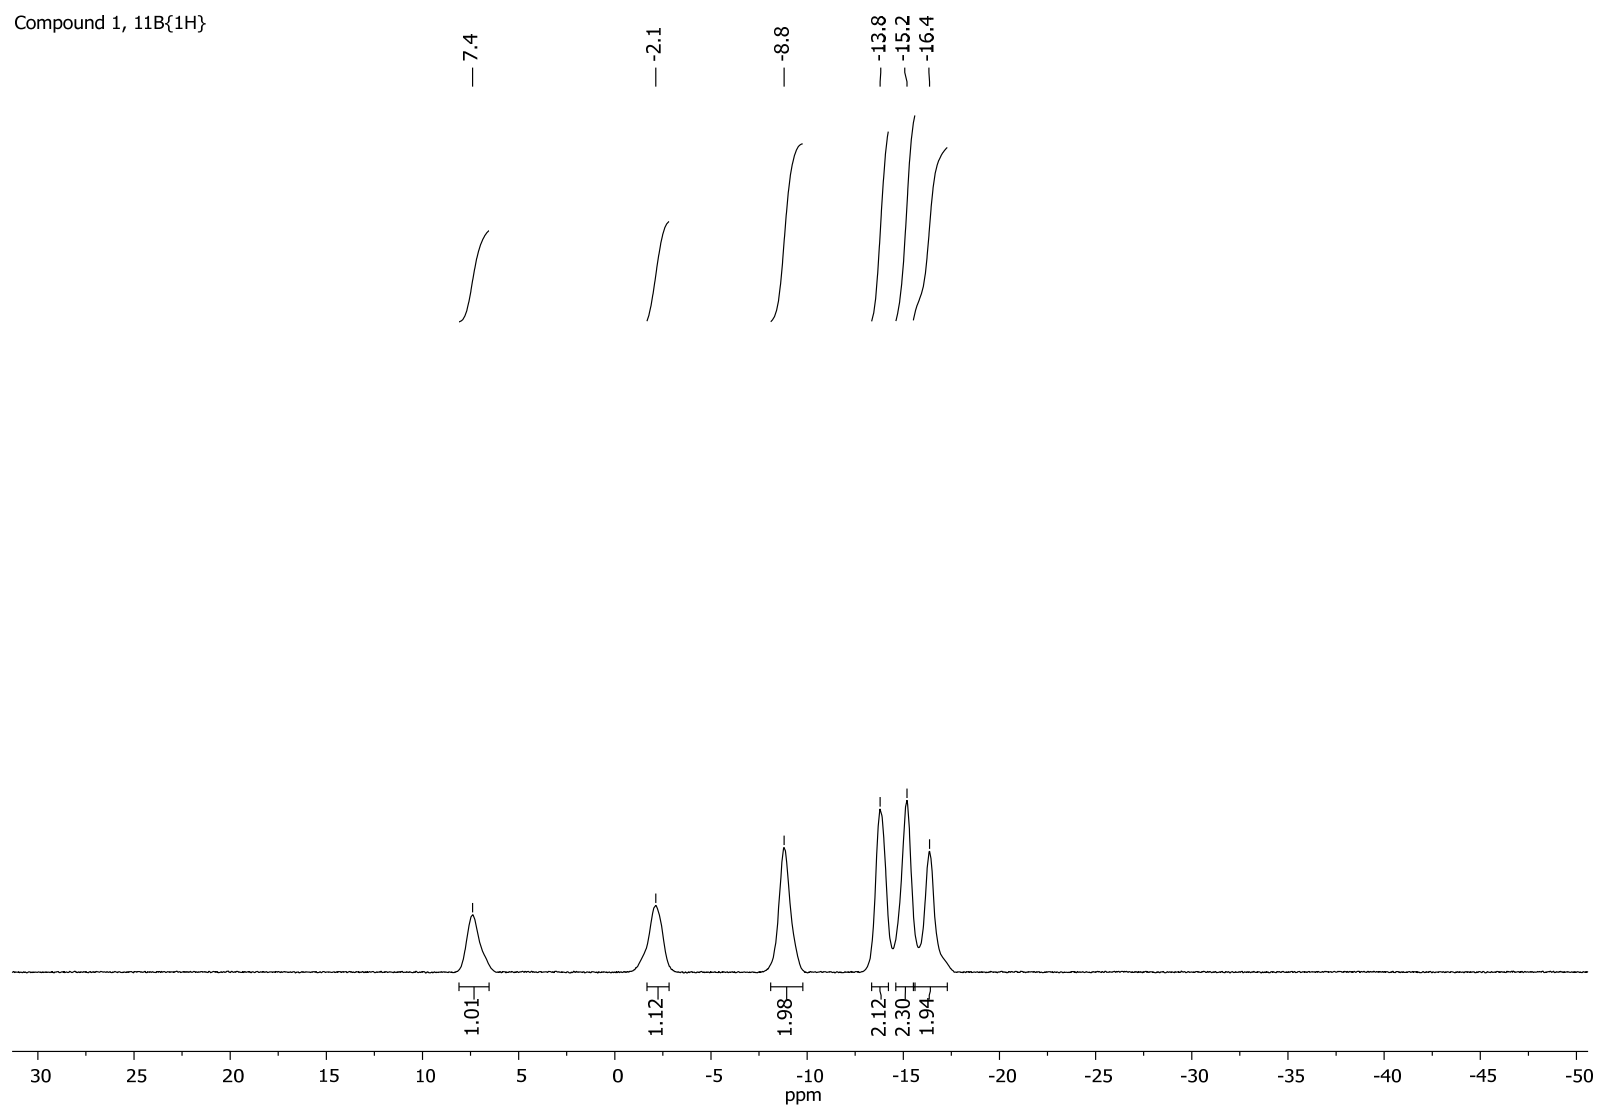

**Figure S2.**  $^{11}\text{B}\{^1\text{H}\}$  NMR spectrum of 9-Cl-1,2- $\text{C}_2\text{B}_{10}\text{H}_{11}$  in  $\text{CDCl}_3$ .

Compound 1, 11B

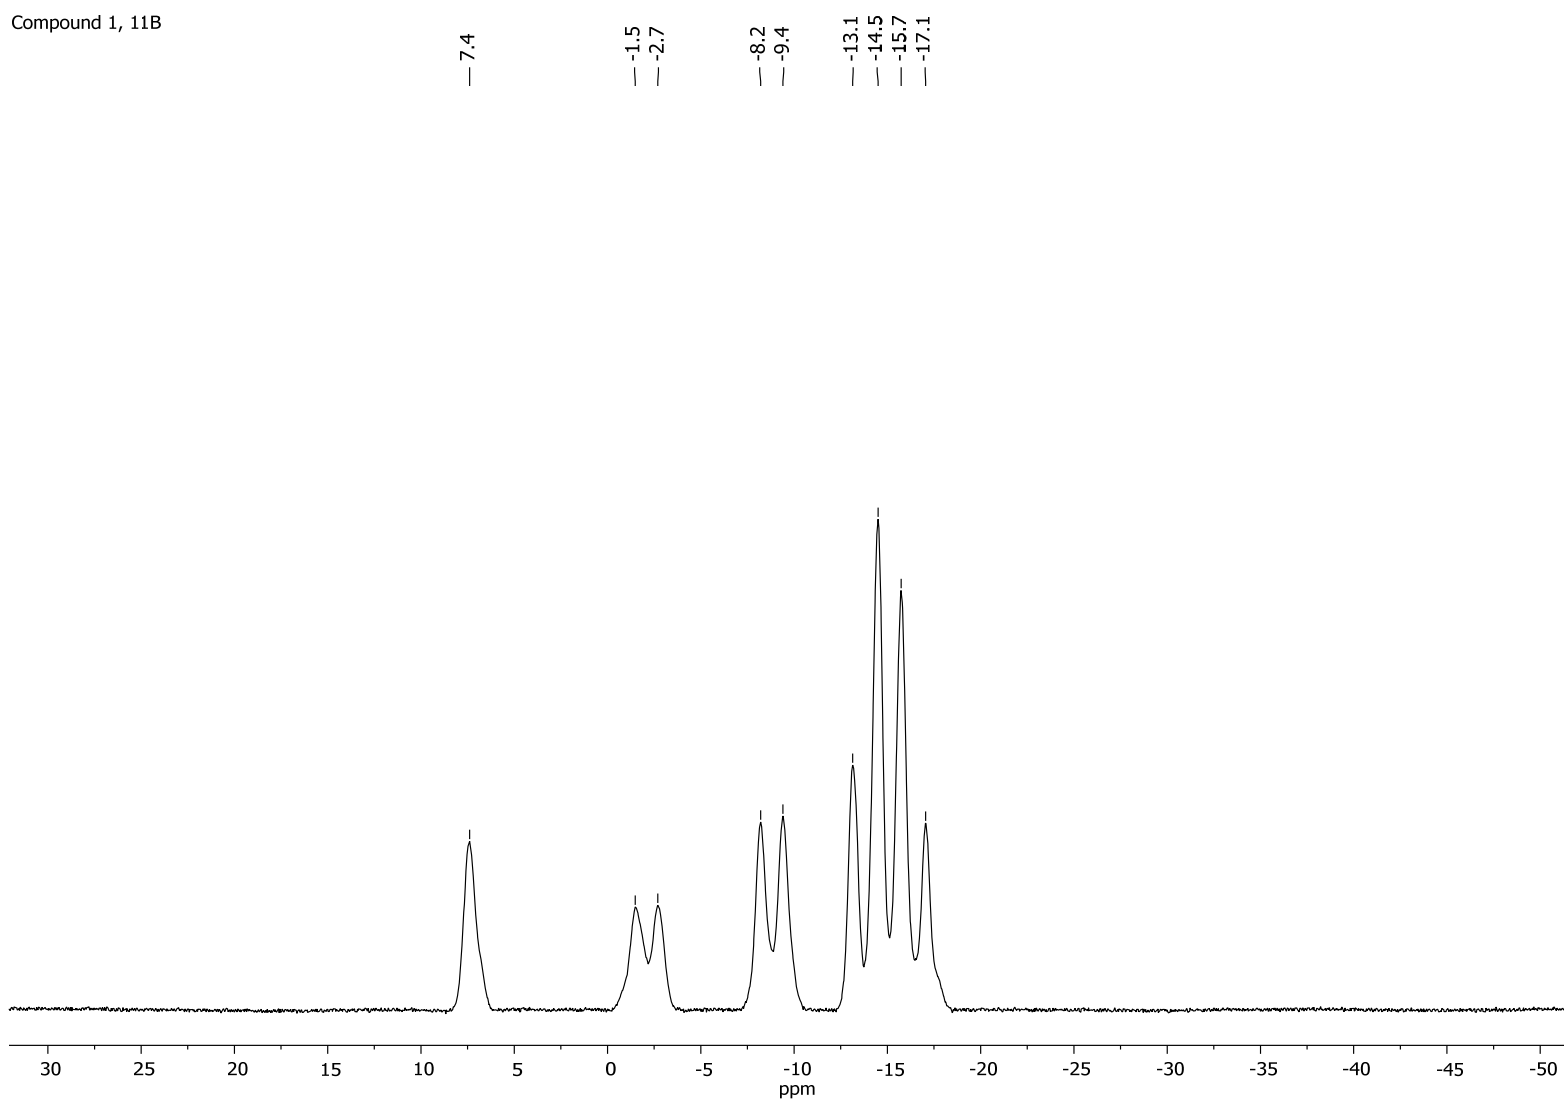

**Figure S3.**  $^{11}\text{B}$  NMR spectrum of 9-Cl-1,2- $\text{C}_2\text{B}_{10}\text{H}_{11}$  in  $\text{CDCl}_3$ .

Compound 1,  $^{13}\text{C}\{^1\text{H}\}$

— 52.2  
— 44.5

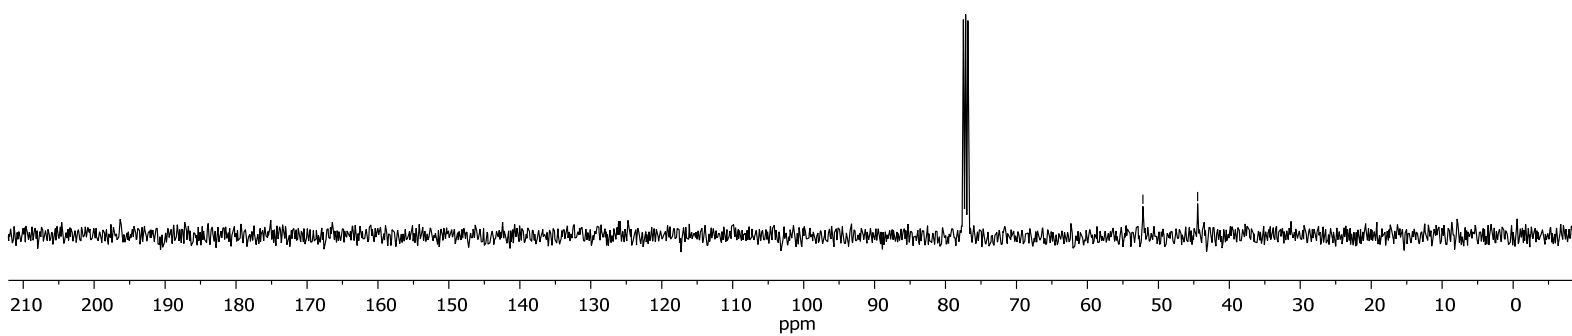

**Figure S4.**  $^{13}\text{C}$  NMR spectrum of 9-Cl-1,2- $\text{C}_2\text{B}_{10}\text{H}_{11}$  in  $\text{CDCl}_3$ .

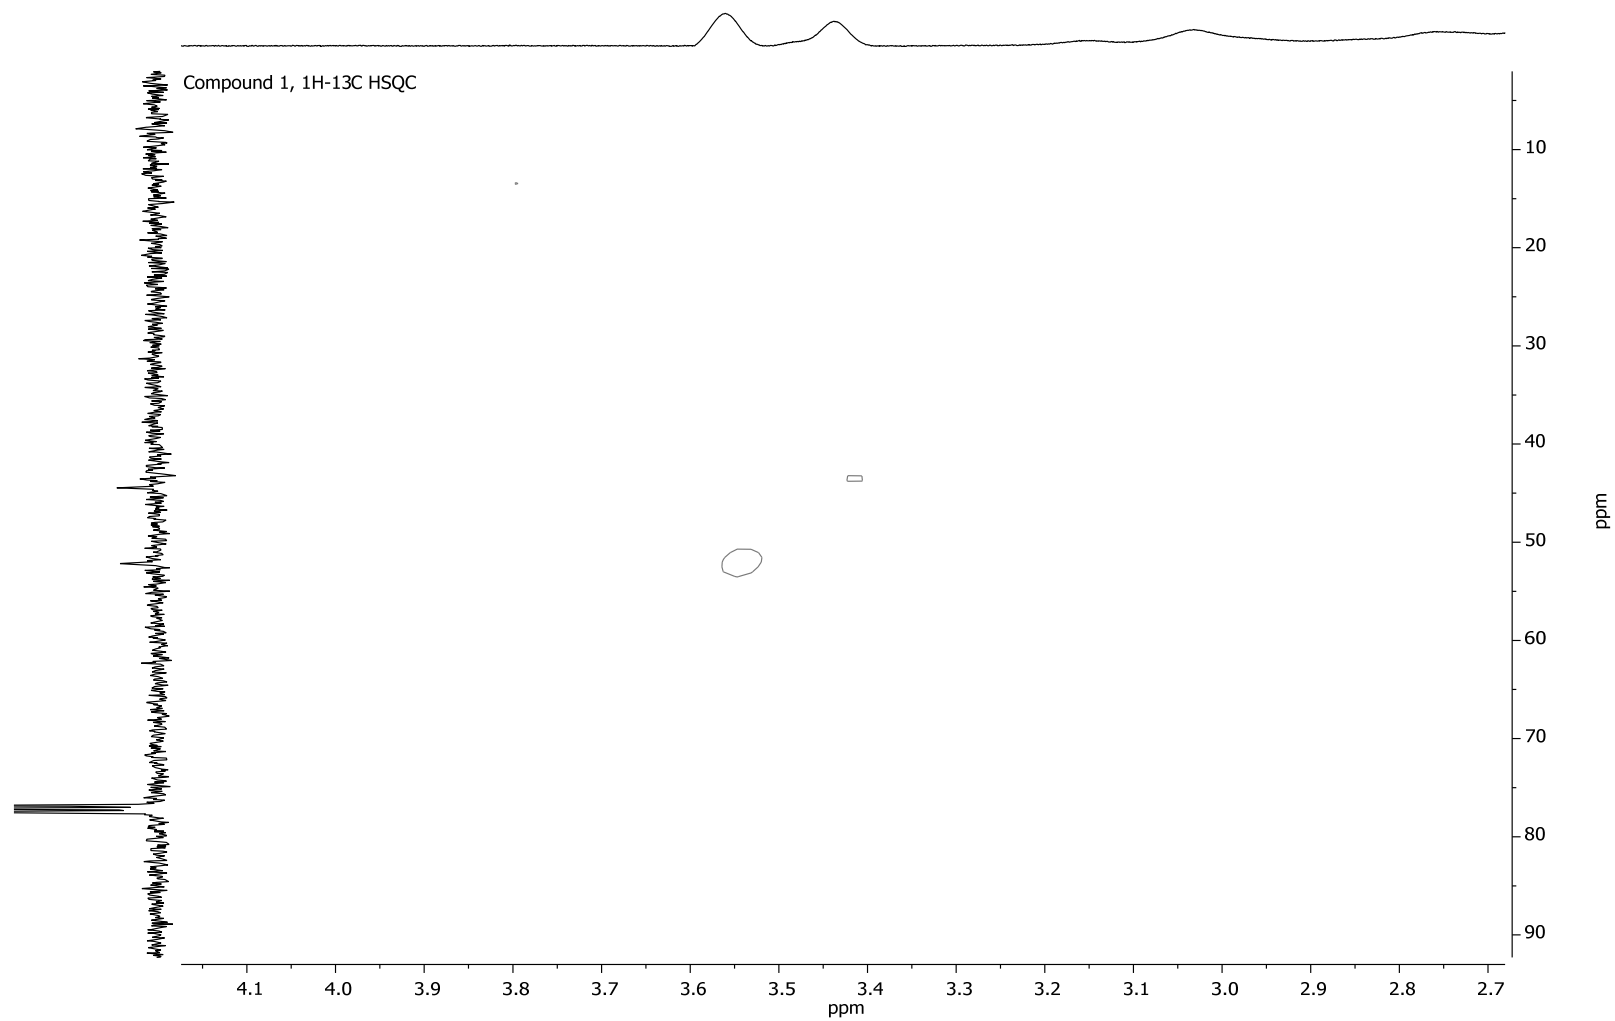

**Figure S5.**  $^1\text{H}$ - $^{13}\text{C}$  HSQC NMR spectrum of 9-Cl-1,2- $\text{C}_2\text{B}_{10}\text{H}_{11}$  in  $\text{CDCl}_3$ .

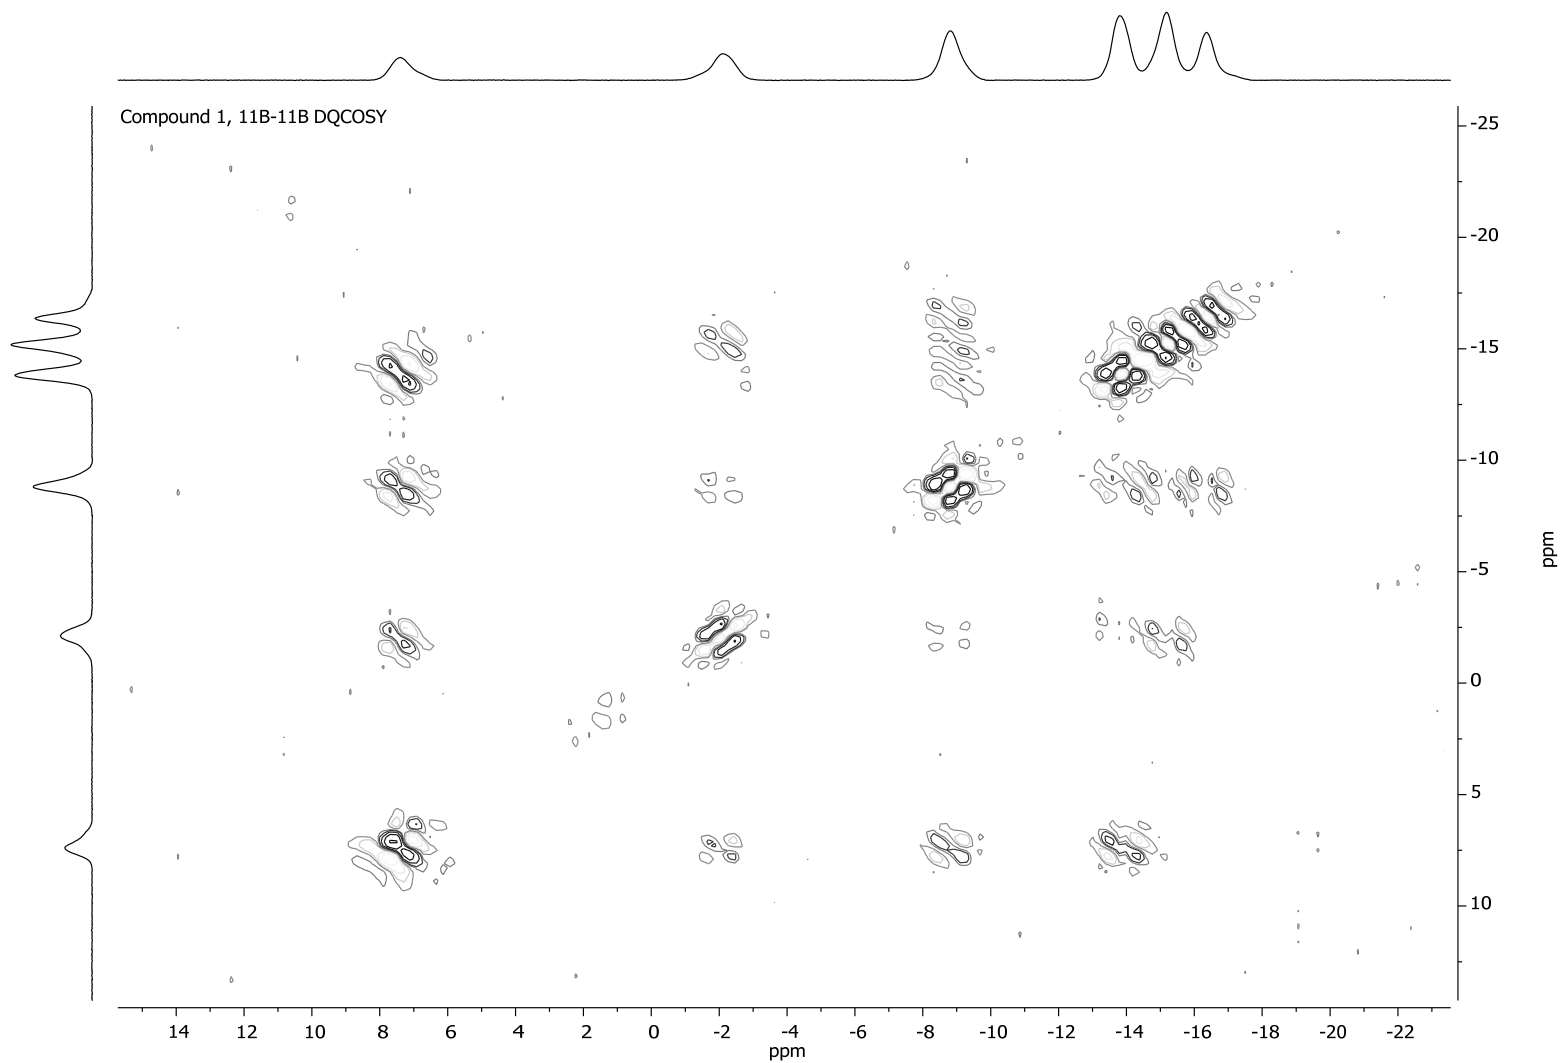

**Figure S6.**  $^{11}\text{B}$ - $^{11}\text{B}$  DQCOSY NMR spectrum of 9-Cl-1,2- $\text{C}_2\text{B}_{10}\text{H}_{11}$  in  $\text{CDCl}_3$ .

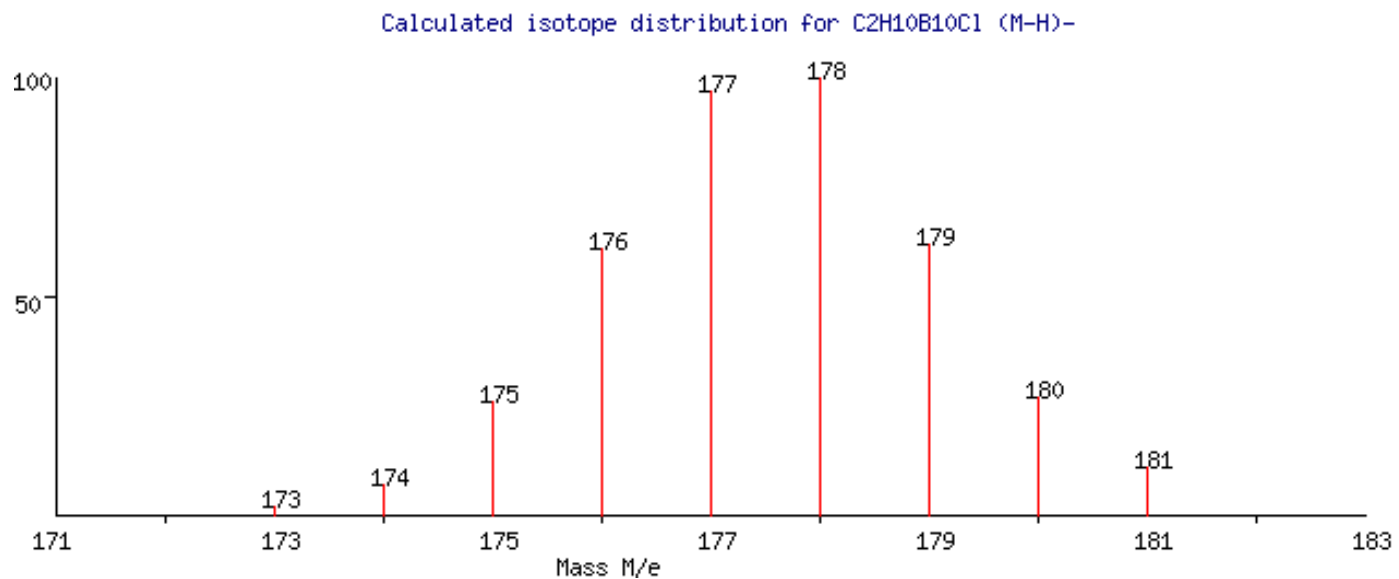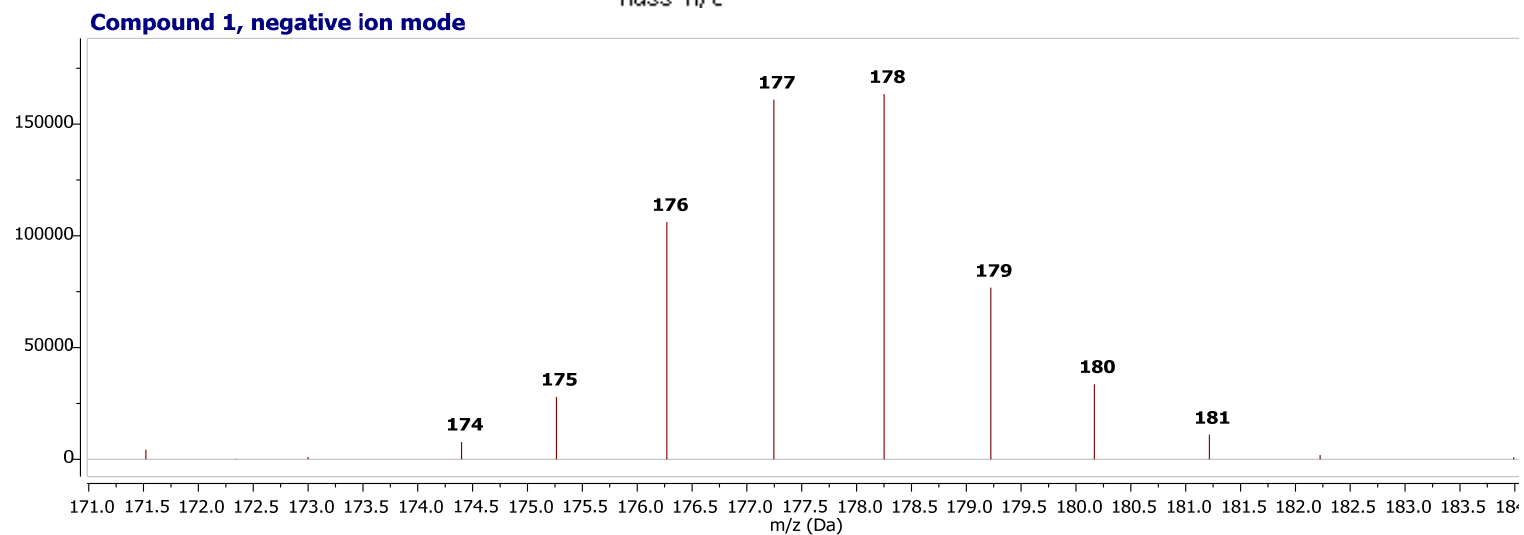

Figure S7. Mass-spectrum of 9-Cl-1,2-C<sub>2</sub>B<sub>10</sub>H<sub>11</sub>.

Compound 2, 1H

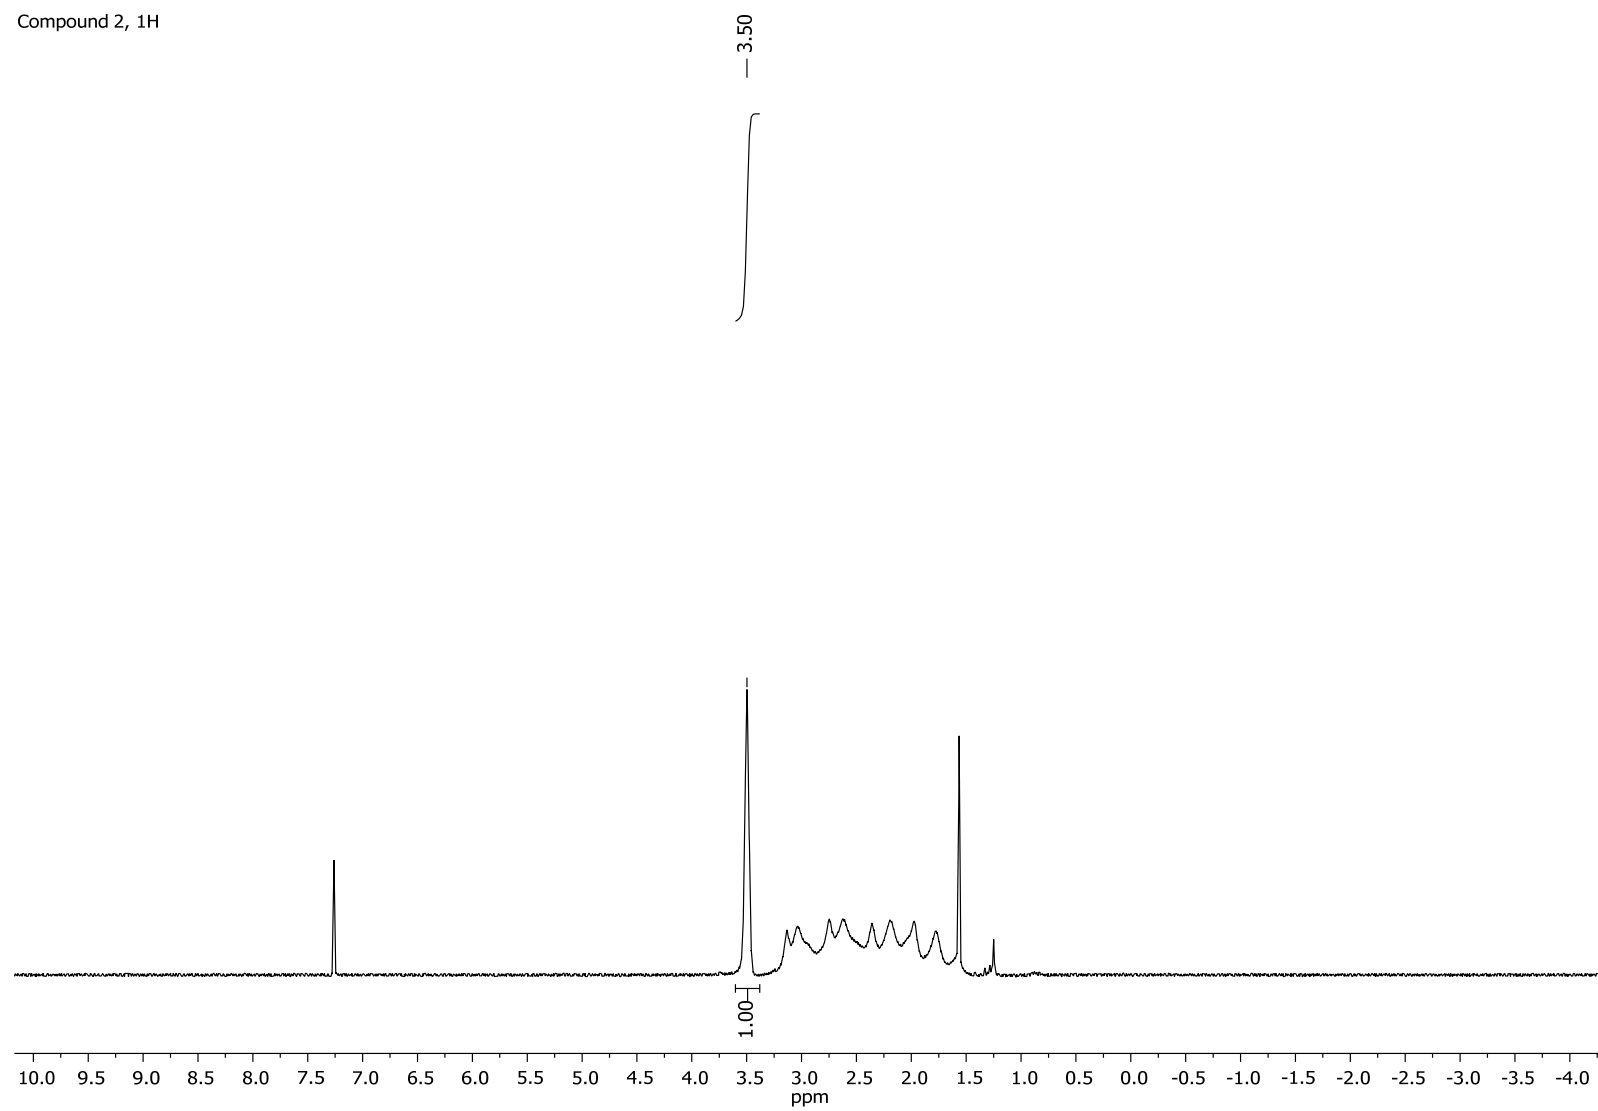

**Figure S8.**  $^1\text{H}$  NMR spectrum of 9,12- $\text{Cl}_2$ -1,2- $\text{C}_{20}\text{H}_{38}$  in  $\text{CDCl}_3$ .

Compound 2,  $^{11}\text{B}\{^1\text{H}\}$

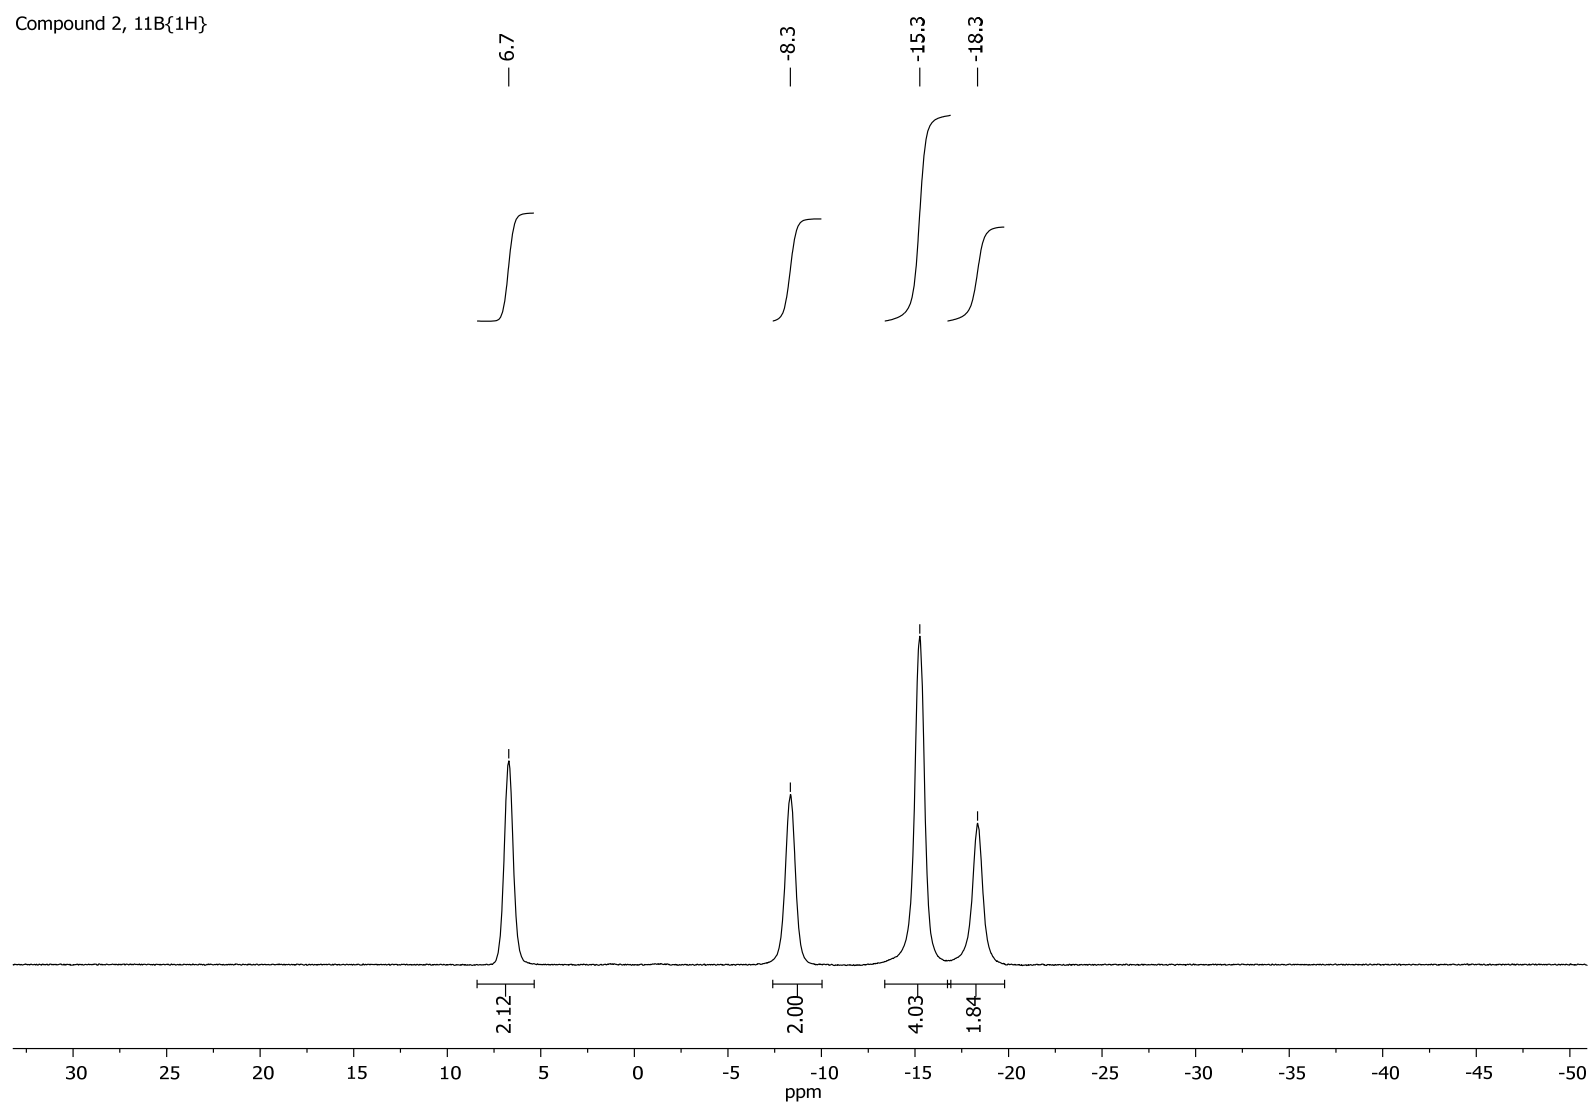

**Figure S9.**  $^{11}\text{B}\{^1\text{H}\}$  NMR spectrum of 9,12- $\text{Cl}_2$ -1,2- $\text{C}_2\text{B}_{10}\text{H}_{10}$  in  $\text{CDCl}_3$ .

Compound 2, 11B

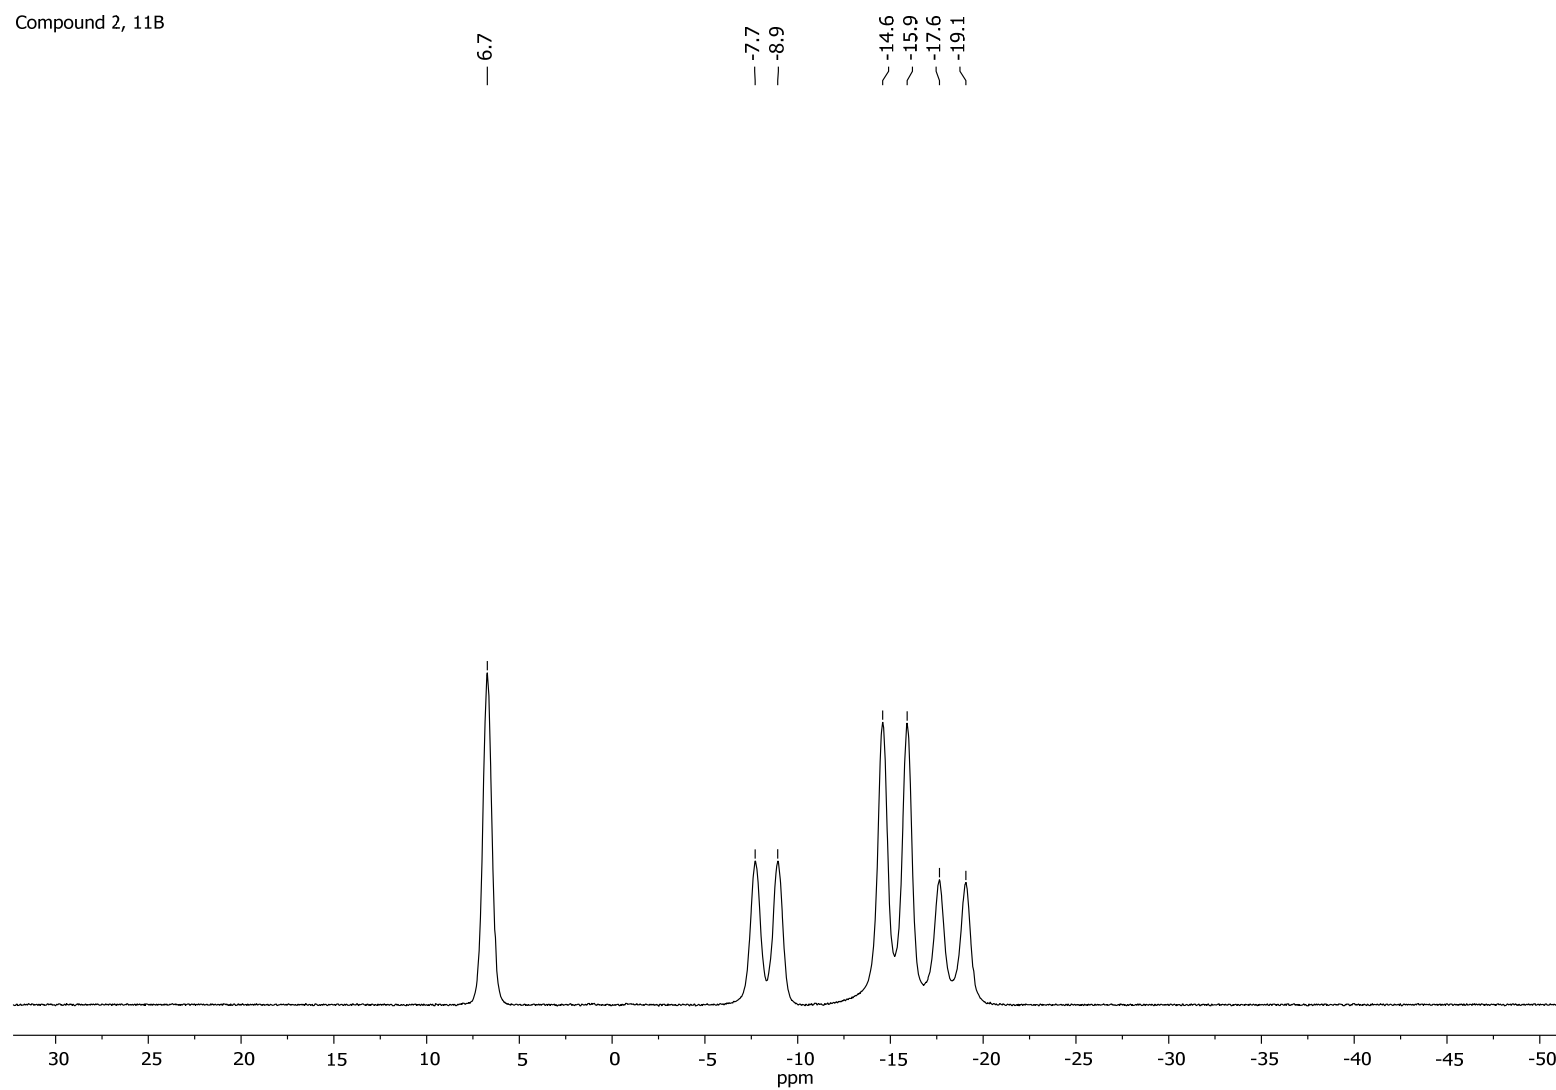

**Figure S10.**  $^{11}\text{B}$  NMR spectrum of 9,12- $\text{Cl}_2$ -1,2- $\text{C}_2\text{B}_{10}\text{H}_{10}$  in  $\text{CDCl}_3$ .

Compound 2,  $^{13}\text{C}\{^1\text{H}\}$

— 43.6

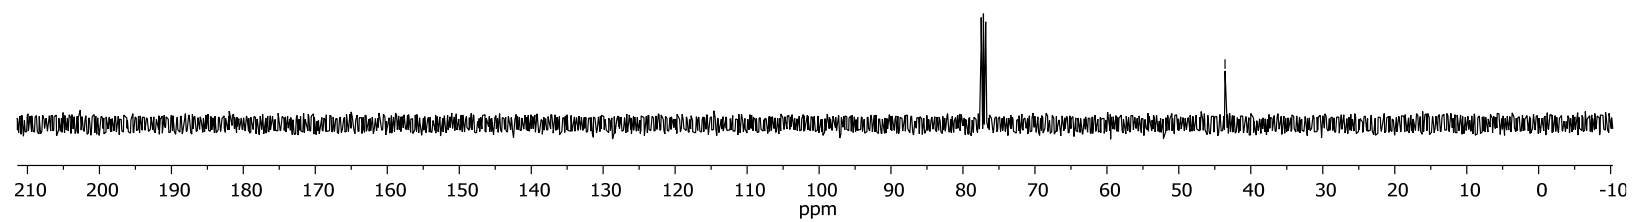

**Figure S11.**  $^{13}\text{C}$  NMR spectrum of 9,12- $\text{Cl}_2$ -1,2- $\text{C}_2\text{B}_{10}\text{H}_{10}$  in  $\text{CDCl}_3$ .

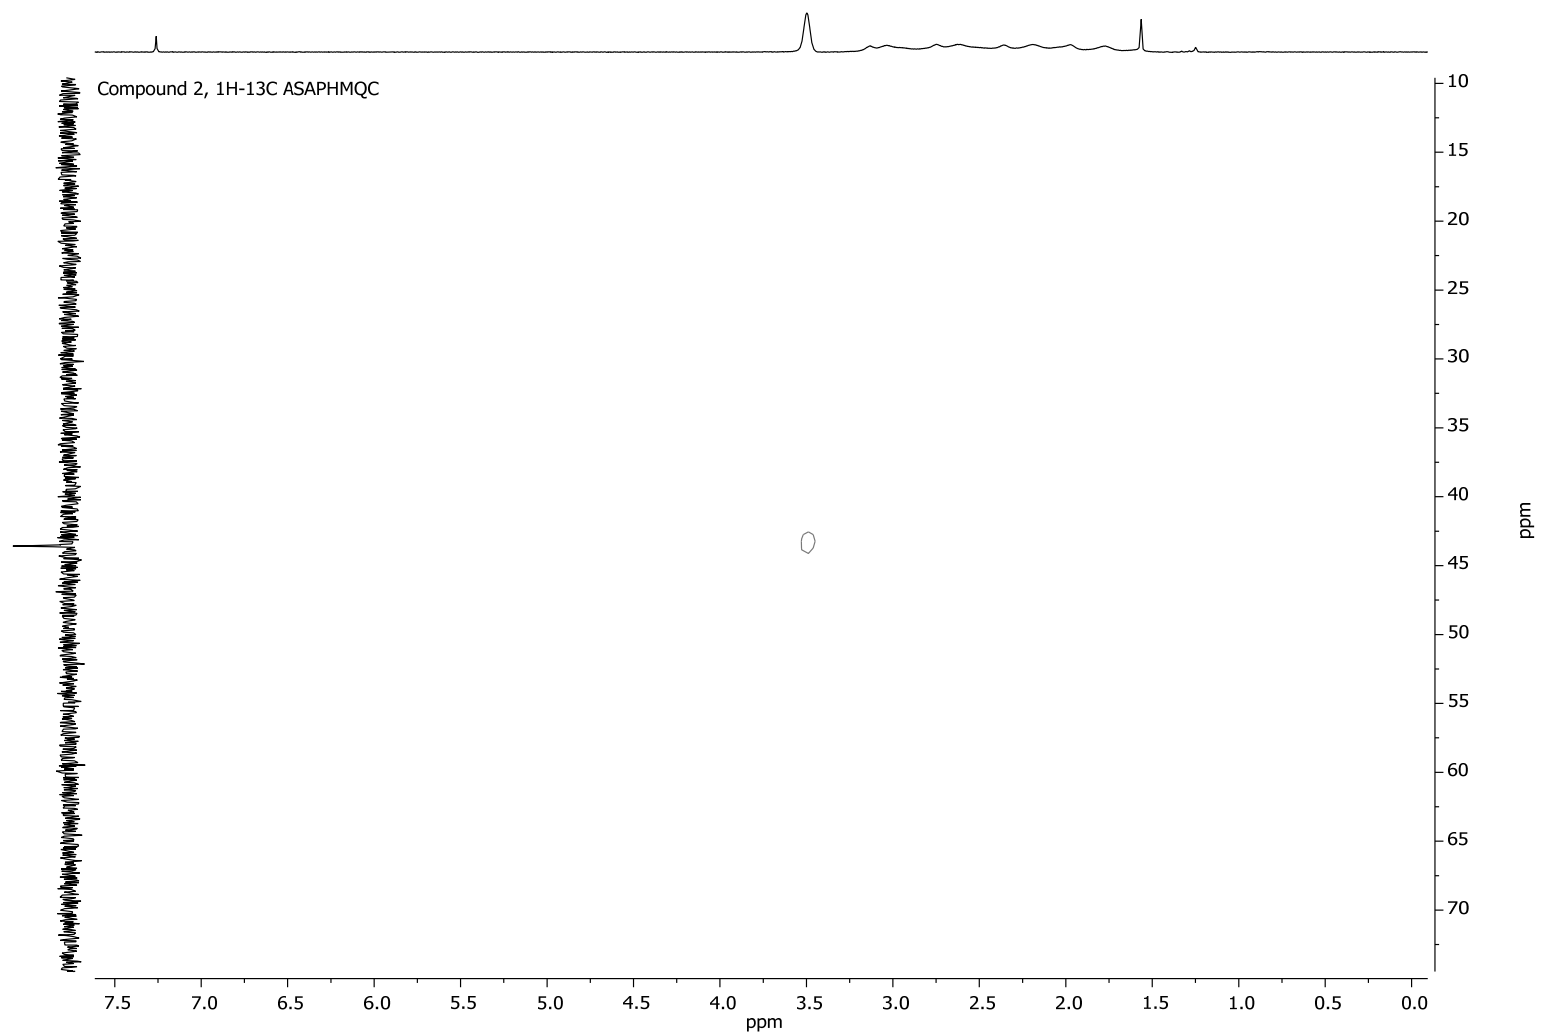

**Figure S12.**  $^1\text{H}$ - $^{13}\text{C}$  ASAPHMQC NMR spectrum of 9,12- $\text{Cl}_2$ -1,2- $\text{C}_{20}\text{H}_{10}$  in  $\text{CDCl}_3$ .

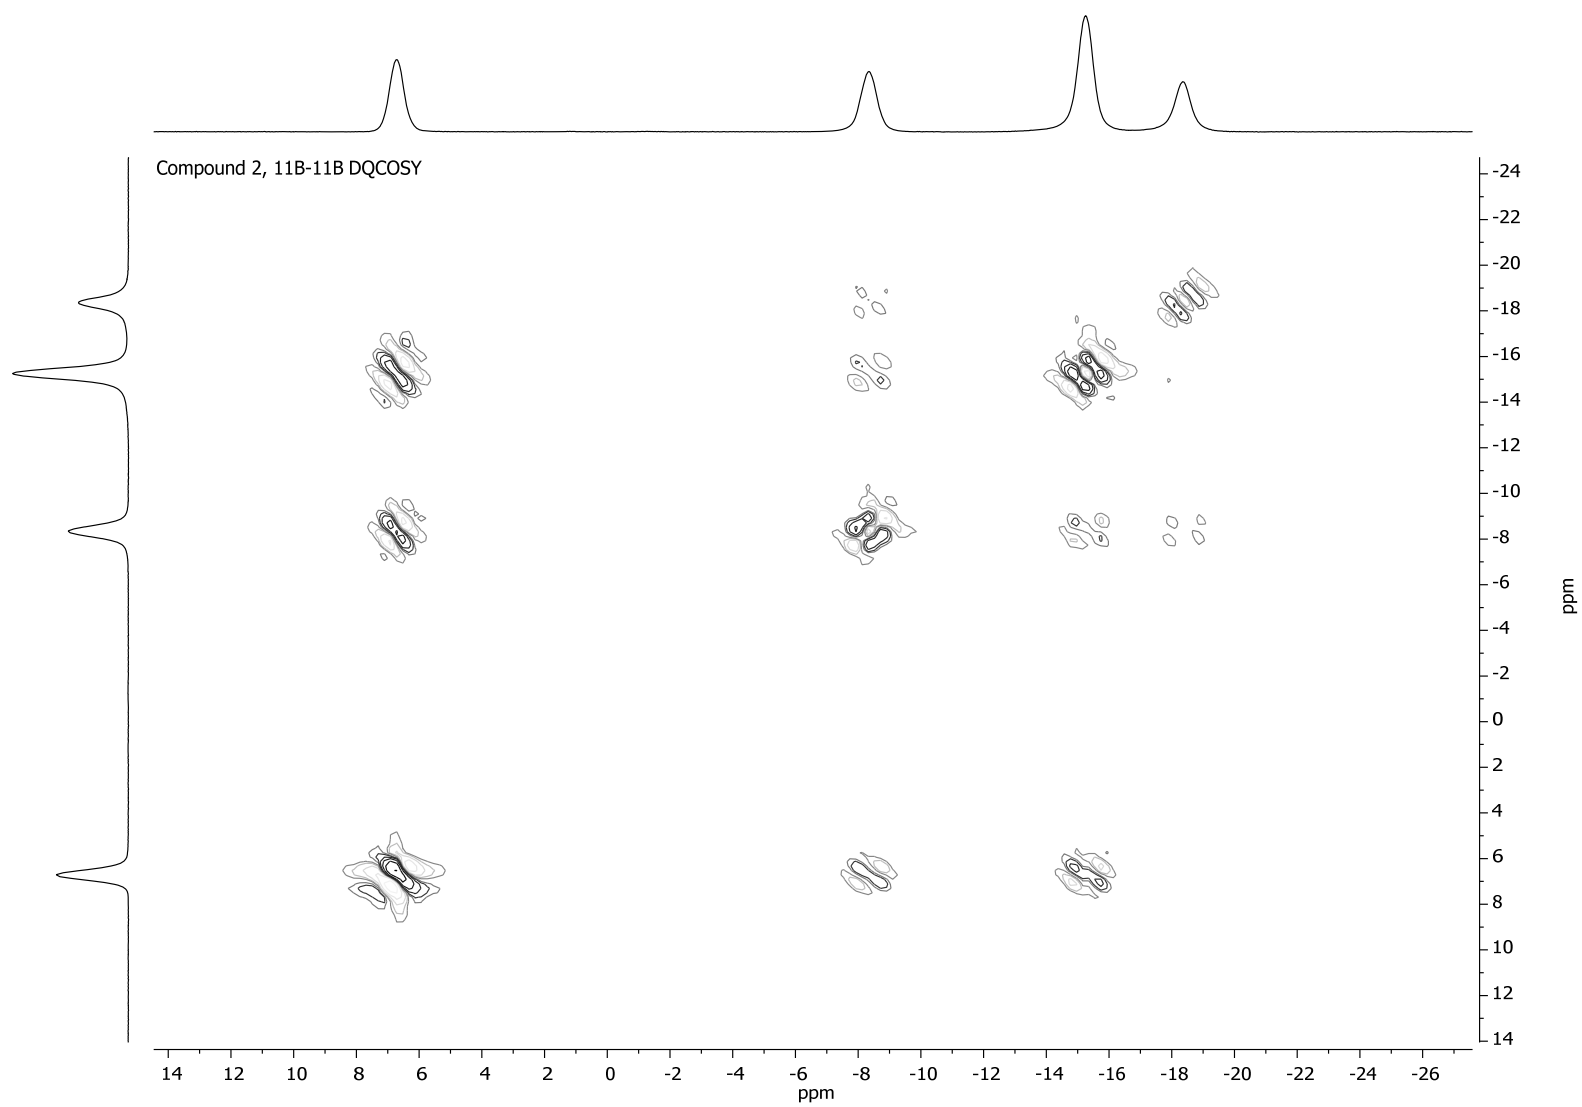

**Figure S13.**  $^{11}\text{B}$ - $^{11}\text{B}$  DQCOSY NMR spectrum of 9,12- $\text{Cl}_2$ -1,2- $\text{C}_{2}\text{B}_{10}\text{H}_{10}$  in  $\text{CDCl}_3$ .

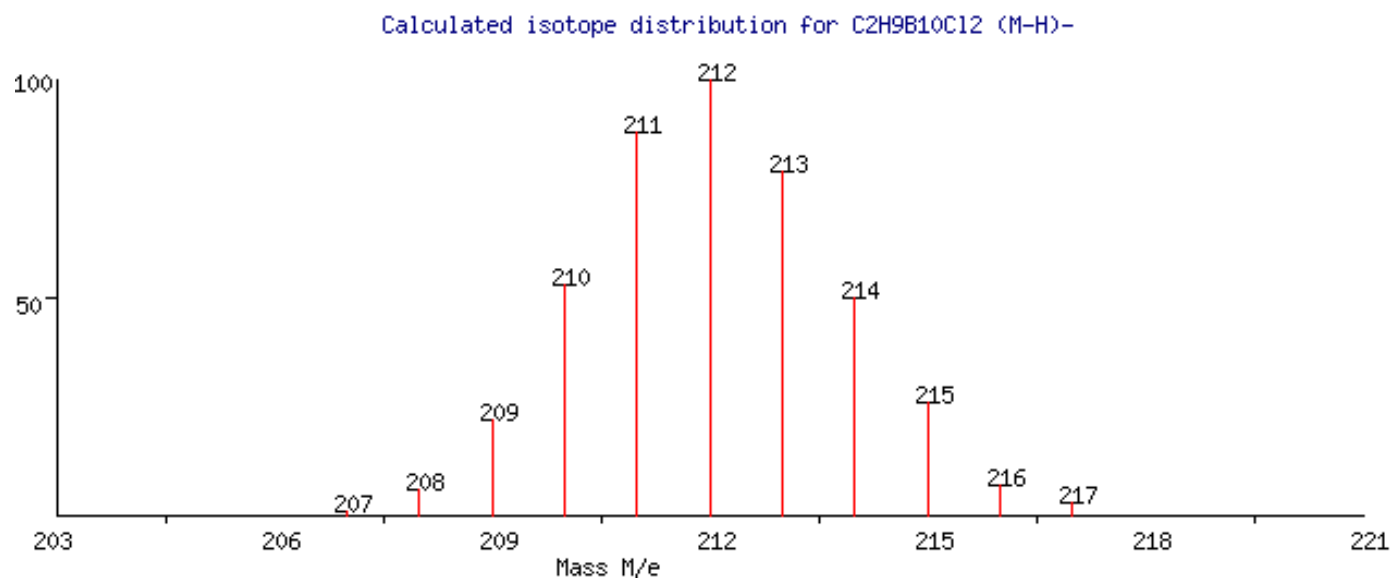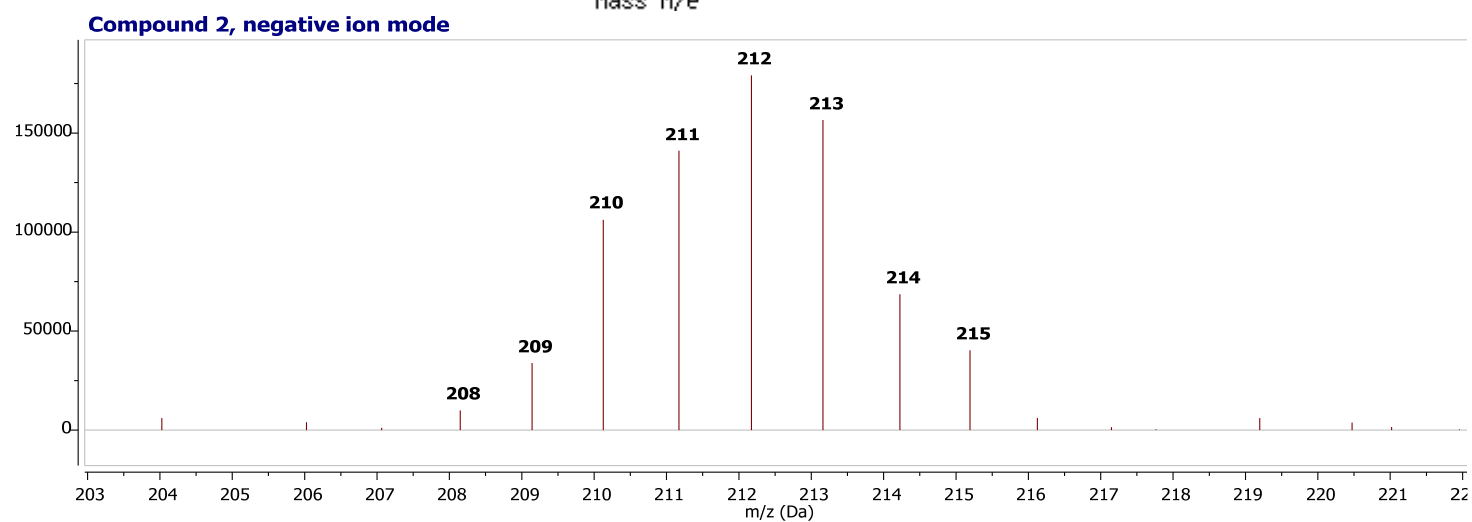

Figure S14. Mass-spectrum of 9,12-Cl<sub>2</sub>-1,2-C<sub>2</sub>B<sub>10</sub>H<sub>10</sub>.

Compound 3, 1H

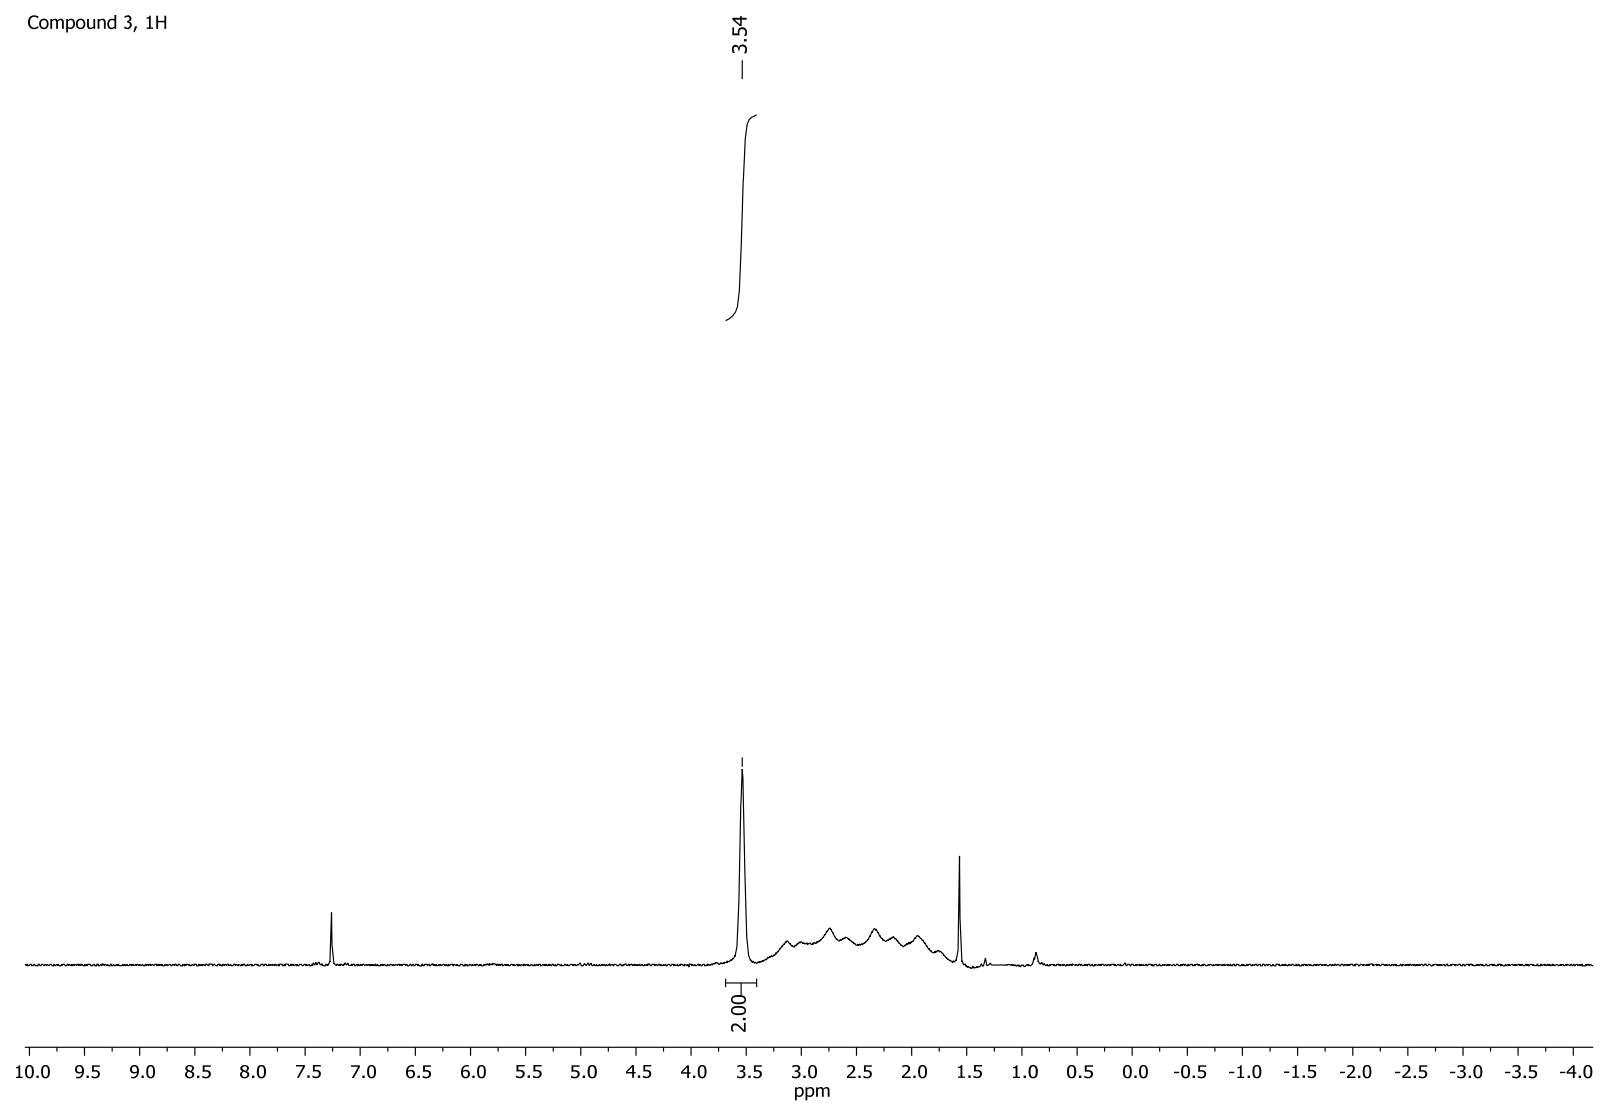

**Figure S15.**  $^1\text{H}$  NMR spectrum of 8,9,12- $\text{Cl}_3$ -1,2- $\text{C}_2\text{B}_{10}\text{H}_9$  in  $\text{CDCl}_3$ .

Compound 3,  $^{11}\text{B}\{^1\text{H}\}$

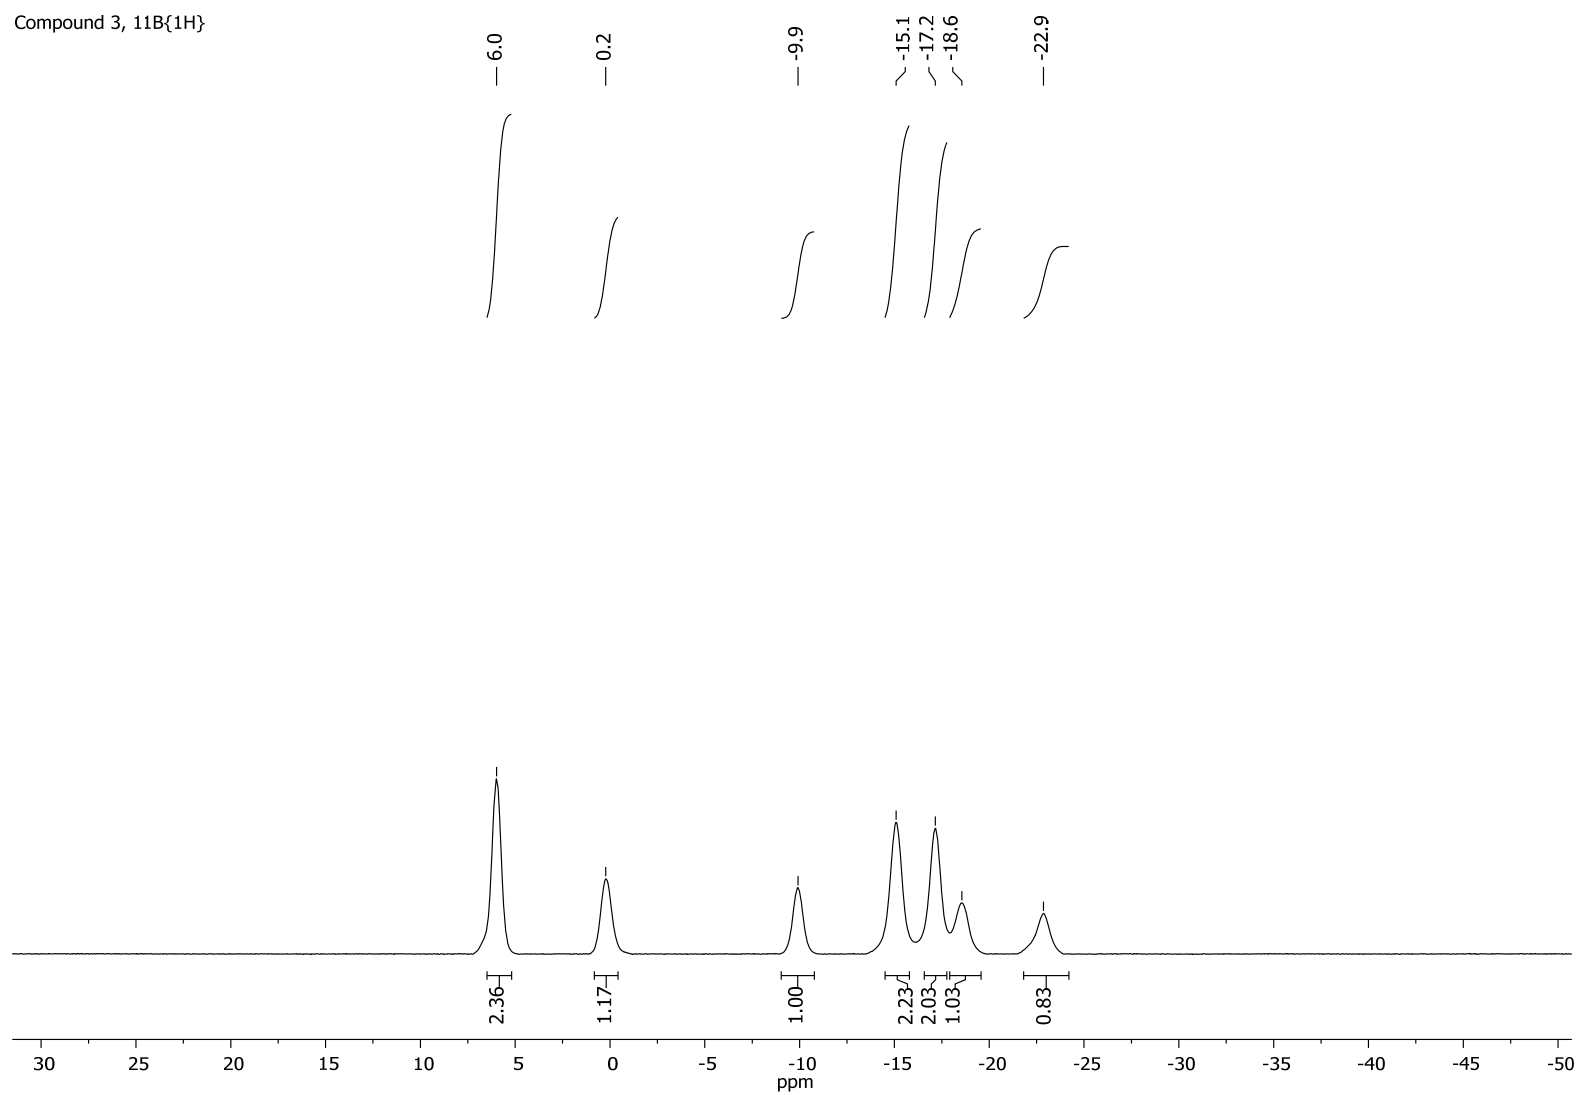

**Figure S16.**  $^{11}\text{B}\{^1\text{H}\}$  NMR spectrum of 8,9,12- $\text{Cl}_3$ -1,2- $\text{C}_2\text{B}_{10}\text{H}_9$  in  $\text{CDCl}_3$ .

Compound 3, 11B

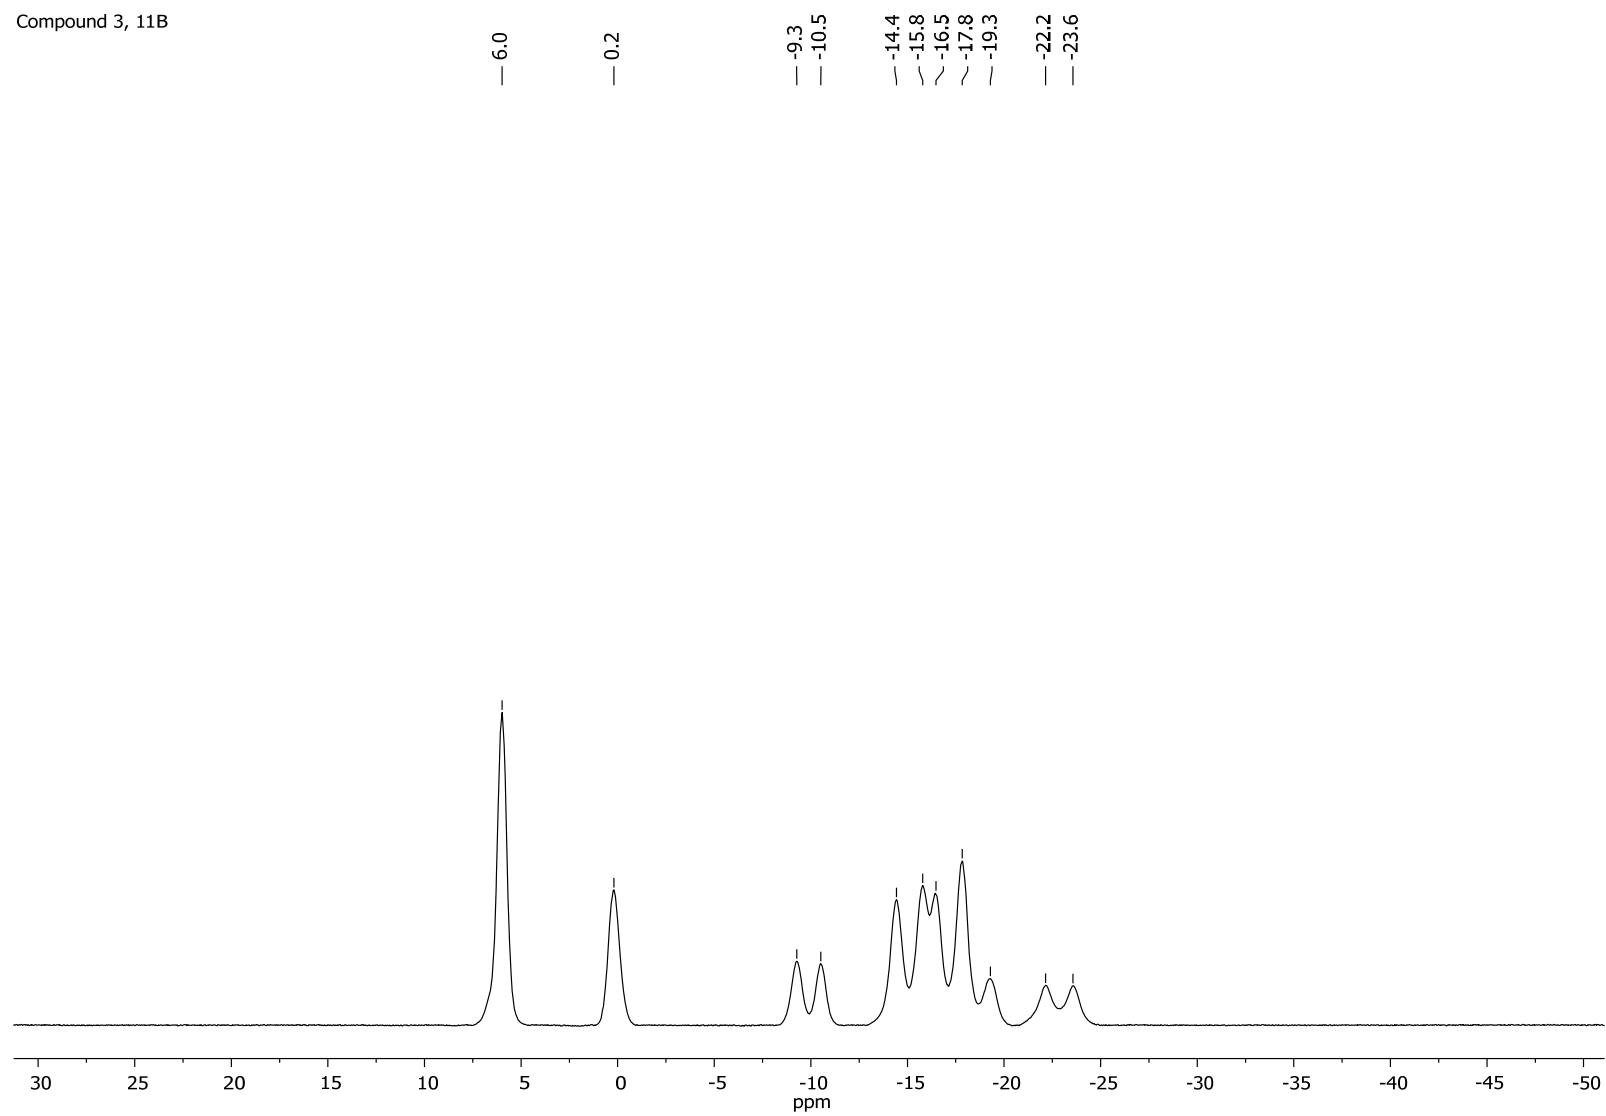

**Figure S17.**  $^{11}\text{B}$  NMR spectrum of 8,9,12- $\text{Cl}_3$ -1,2- $\text{C}_2\text{B}_{10}\text{H}_9$  in  $\text{CDCl}_3$ .

Compound 3,  $^{13}\text{C}\{^1\text{H}\}$

— 41.0

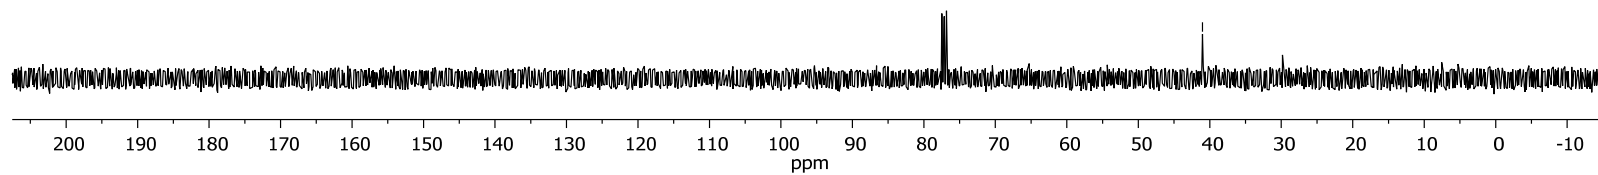

**Figure S18.**  $^{13}\text{C}$  NMR spectrum of 8,9,12- $\text{Cl}_3$ -1,2- $\text{C}_2\text{B}_{10}\text{H}_9$  in  $\text{CDCl}_3$ .

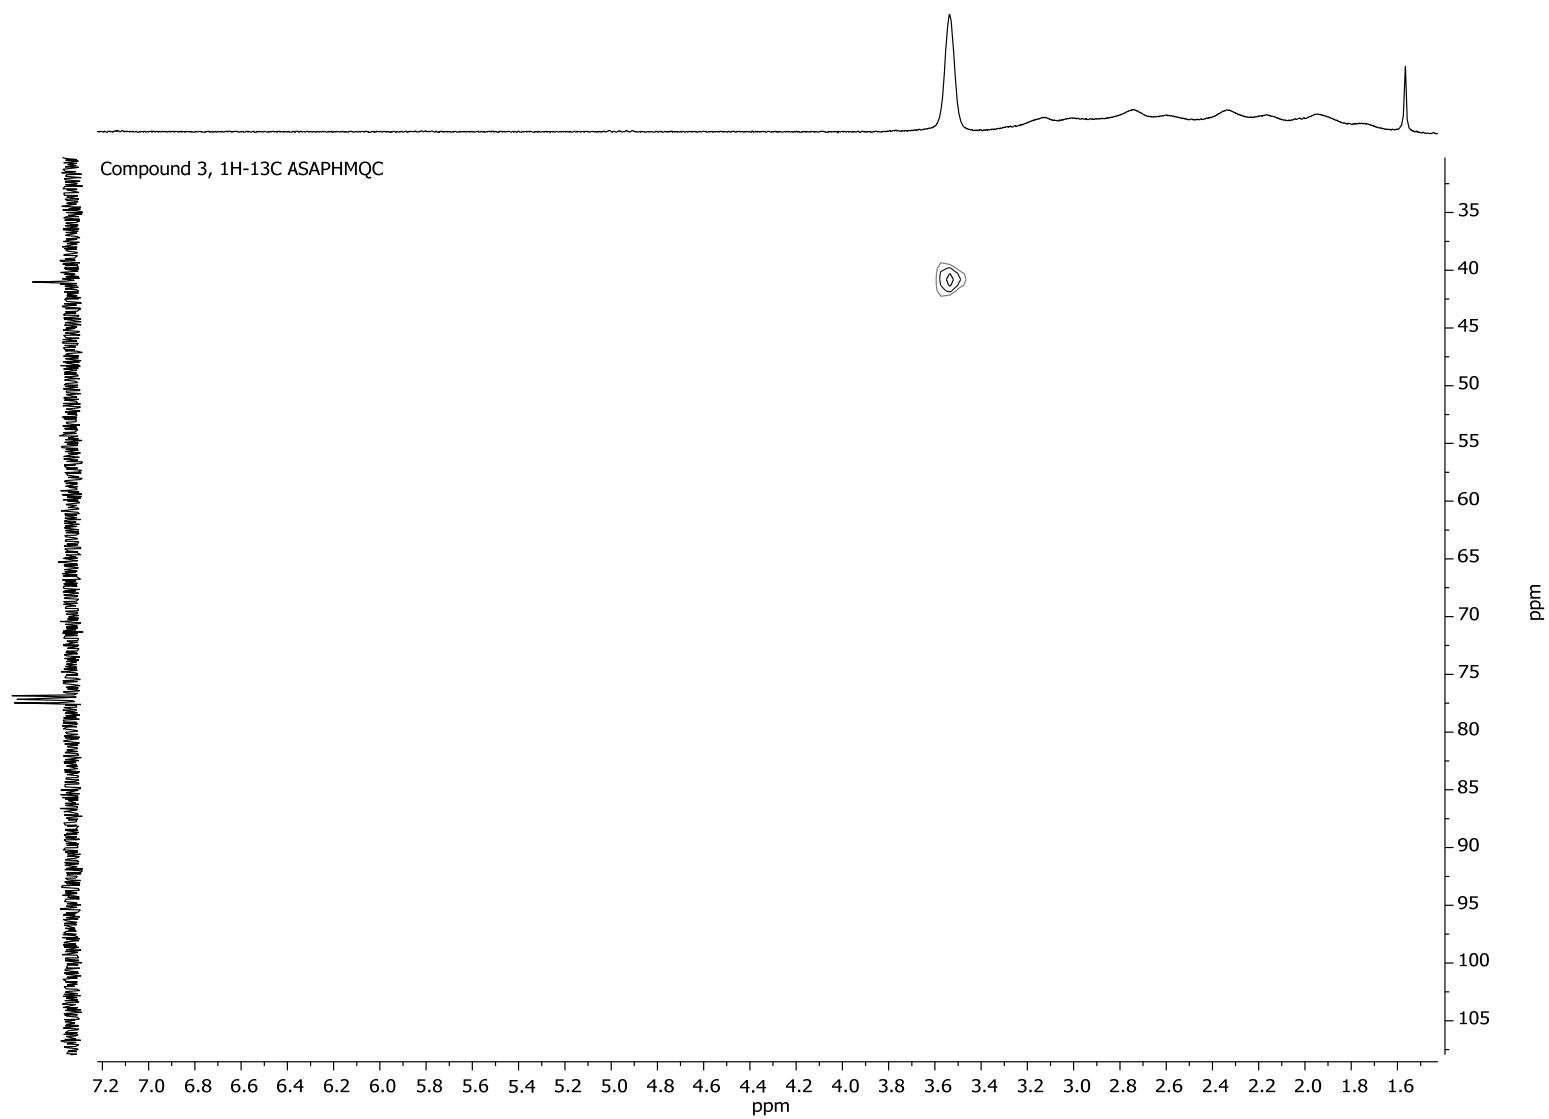

**Figure S19.**  $^1\text{H}$ - $^{13}\text{C}$  ASAPHMQC NMR spectrum of 8,9,12- $\text{Cl}_3$ -1,2- $\text{C}_2\text{B}_{10}\text{H}_9$  in  $\text{CDCl}_3$ .

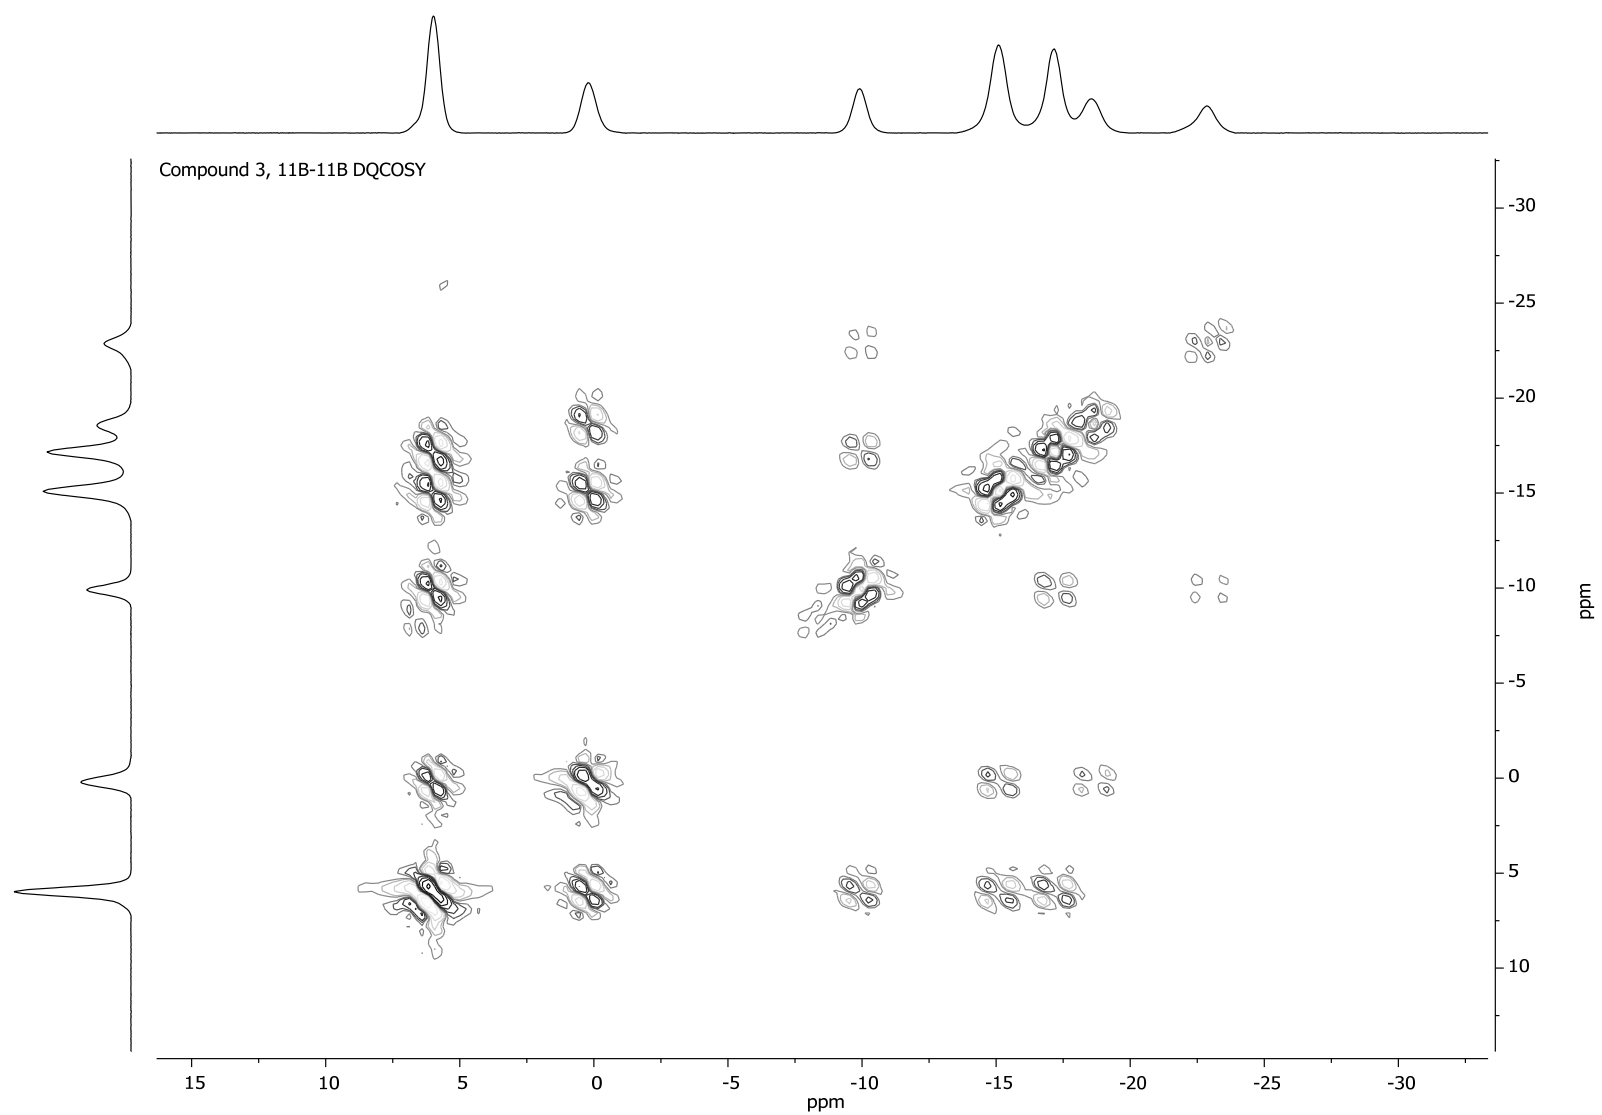

**Figure S20.**  $^{11}\text{B}$ - $^{11}\text{B}$  DQCOSY NMR spectrum of 8,9,12- $\text{Cl}_3$ -1,2- $\text{C}_2\text{B}_{10}\text{H}_9$  in  $\text{CDCl}_3$ .

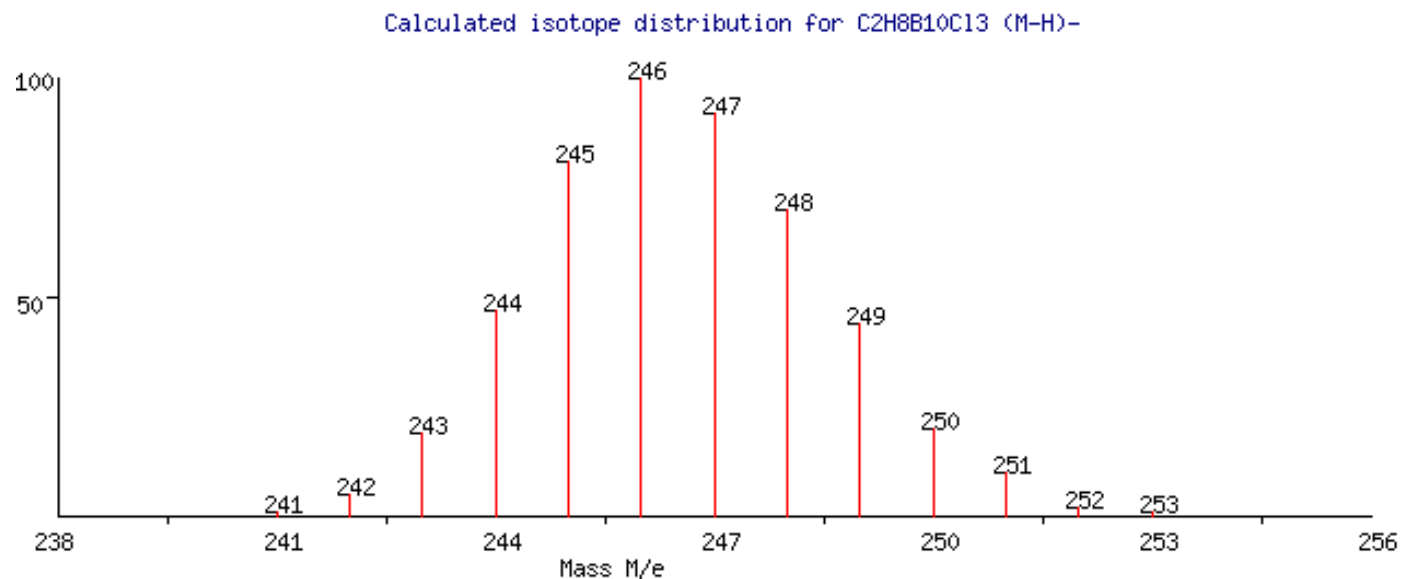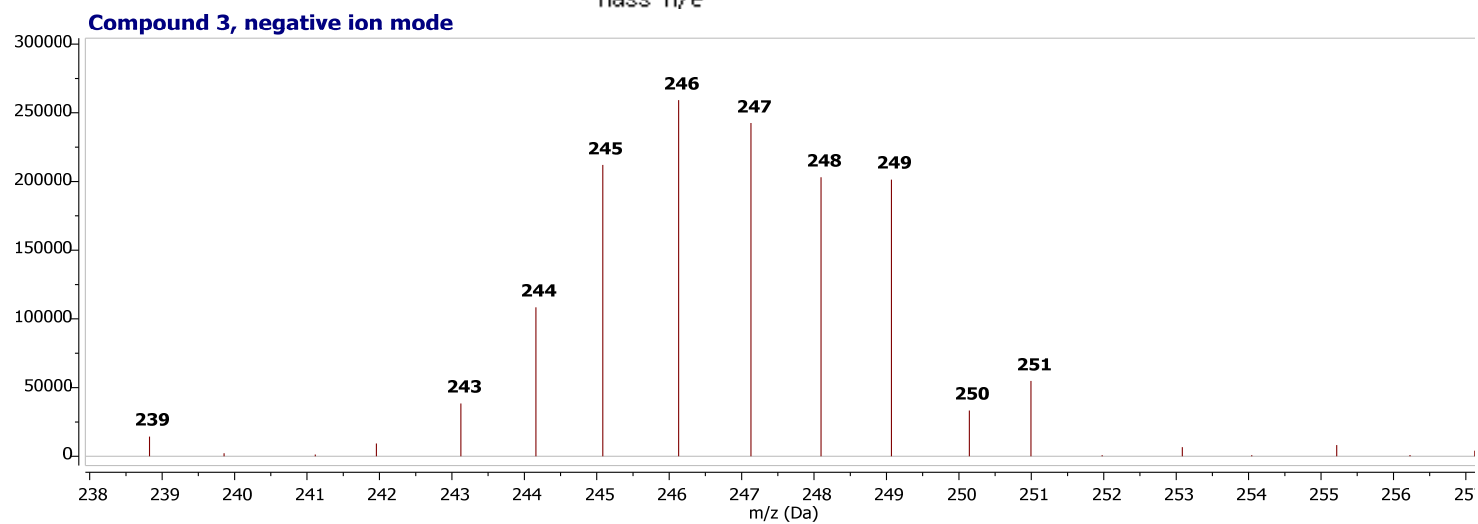

Figure S21. Mass-spectrum of 8,9,12-Cl<sub>3</sub>-1,2-C<sub>2</sub>B<sub>10</sub>H<sub>9</sub>.

Compound 4, 1H

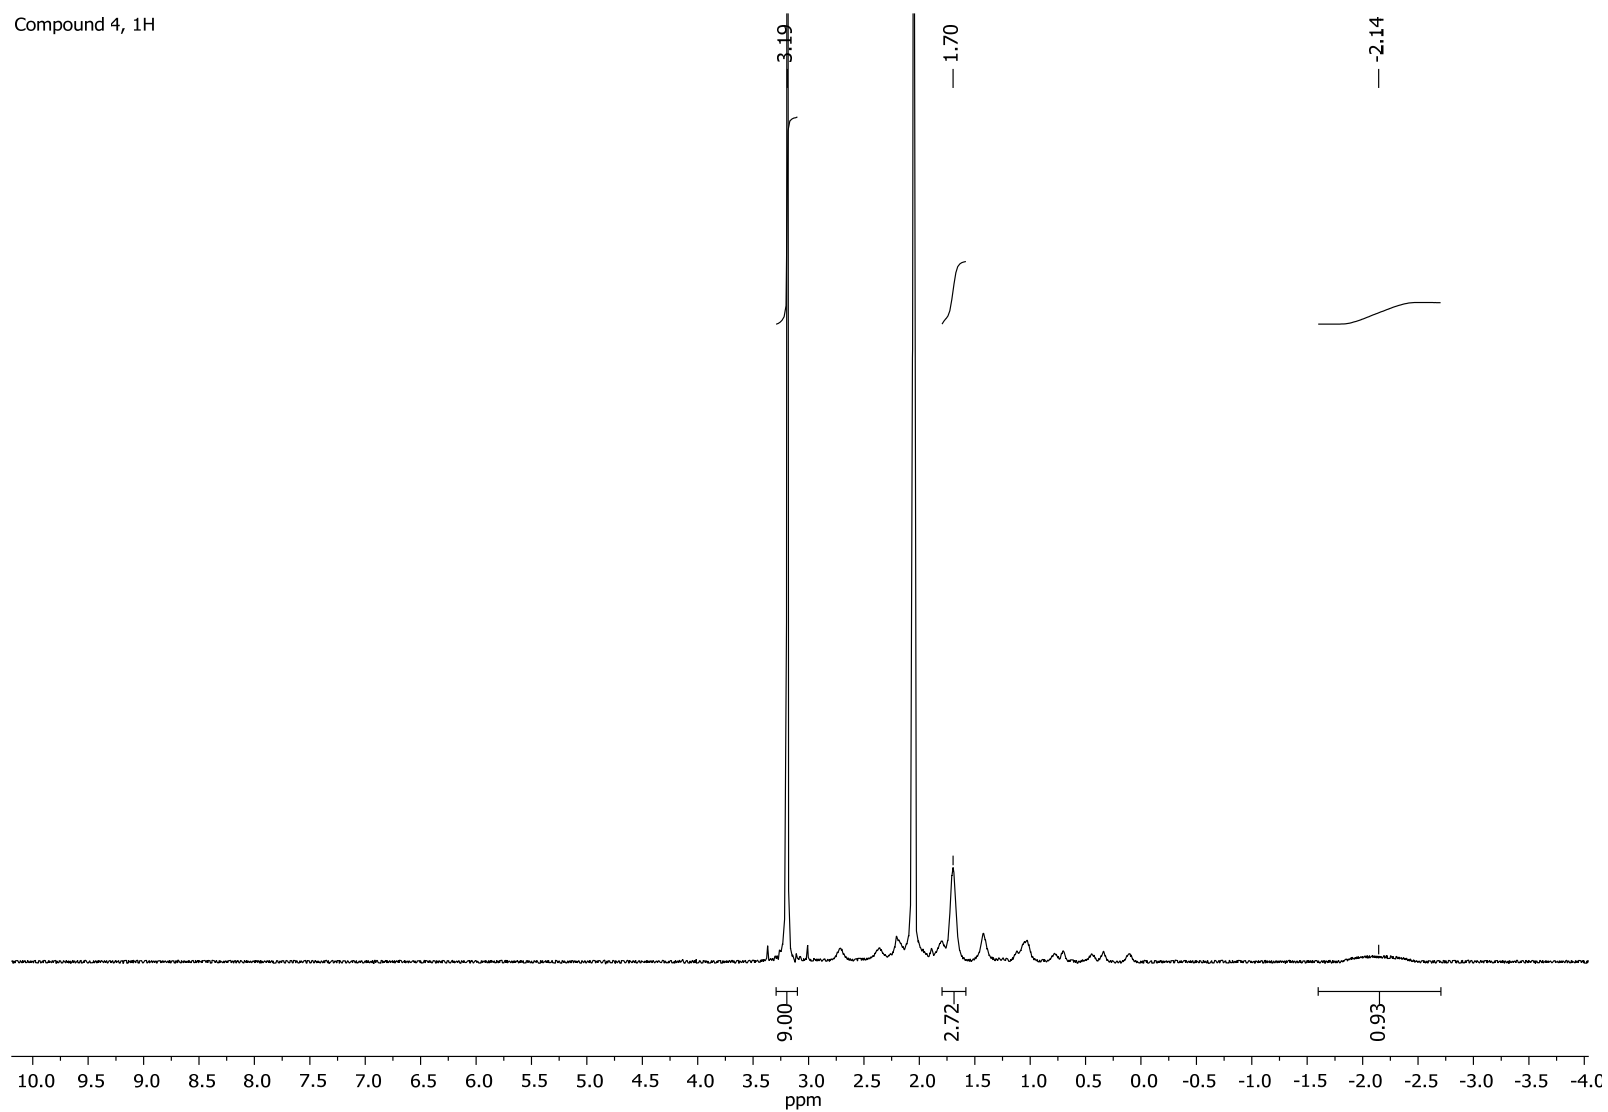

**Figure S22.**  $^1\text{H}$  NMR spectrum of  $(\text{Me}_3\text{NH})[5,6\text{-Cl}_2\text{-}7,8\text{-C}_2\text{B}_9\text{H}_{10}]$  in  $\text{acetone-}d_6$ .

Compound 4,  $^{11}\text{B}\{^1\text{H}\}$

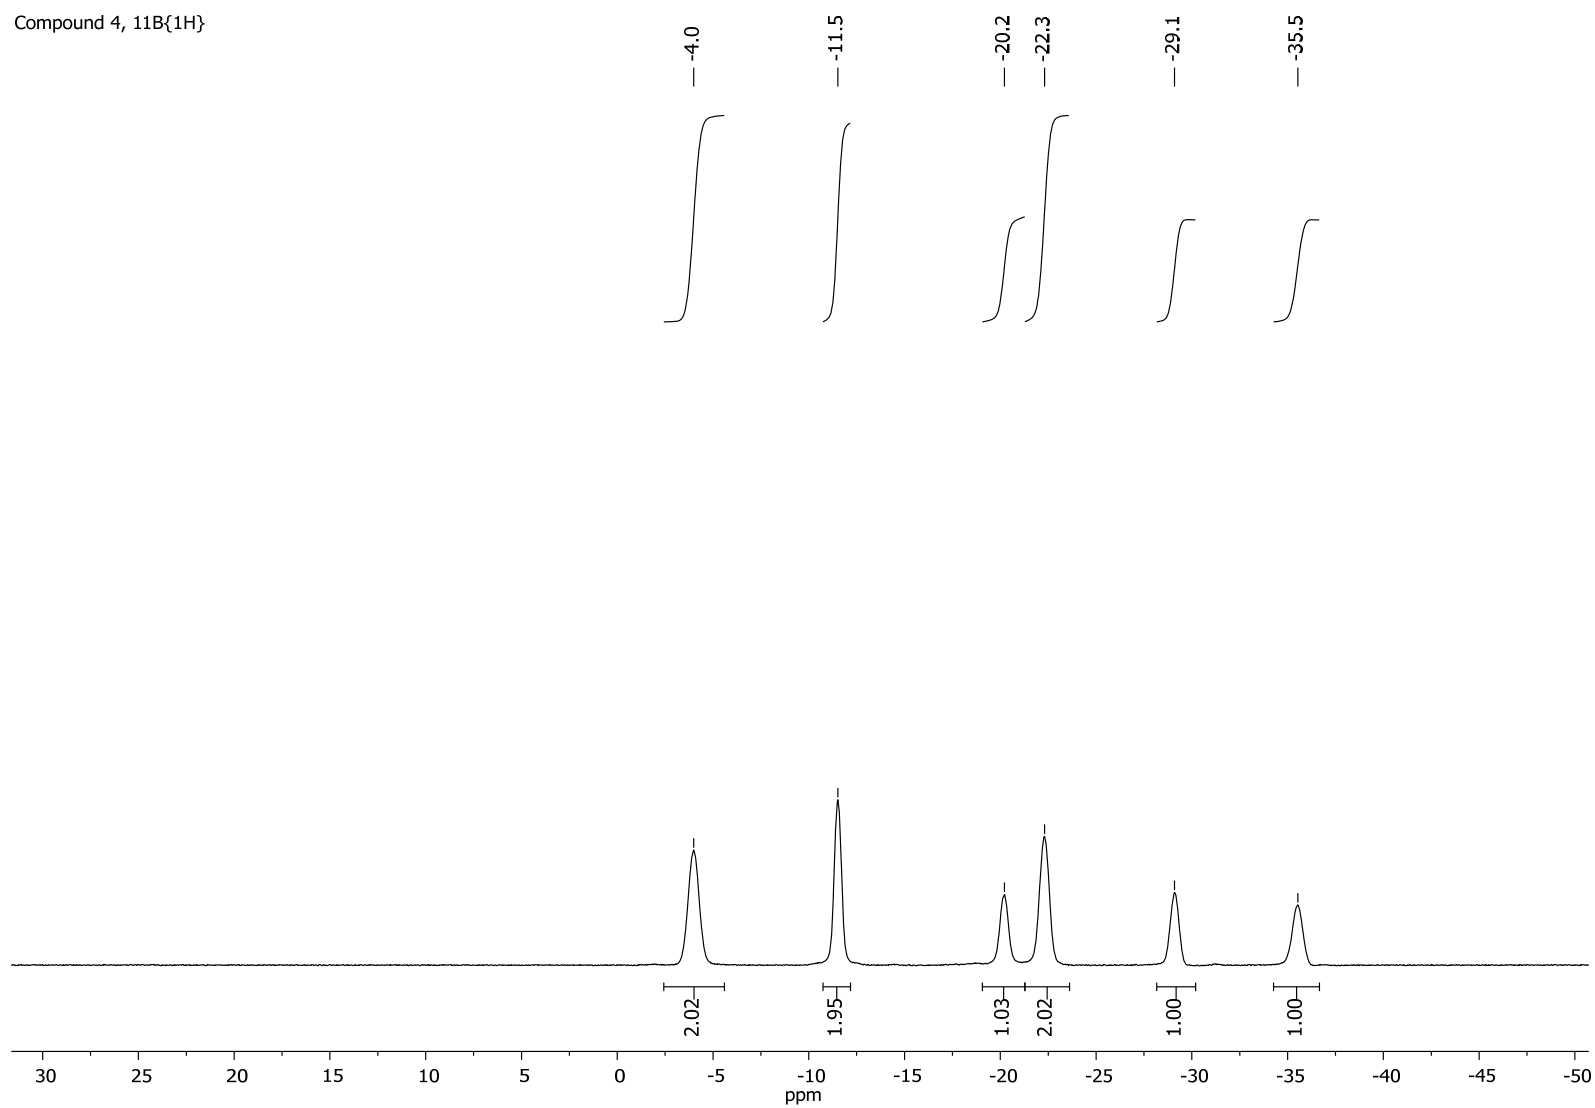

**Figure S23.**  $^{11}\text{B}\{^1\text{H}\}$  NMR spectrum of  $(\text{Me}_3\text{NH})[5,6\text{-Cl}_2\text{-}7,8\text{-C}_2\text{B}_9\text{H}_{10}]$  in  $\text{acetone-}d_6$ .

Compound 4, 11B

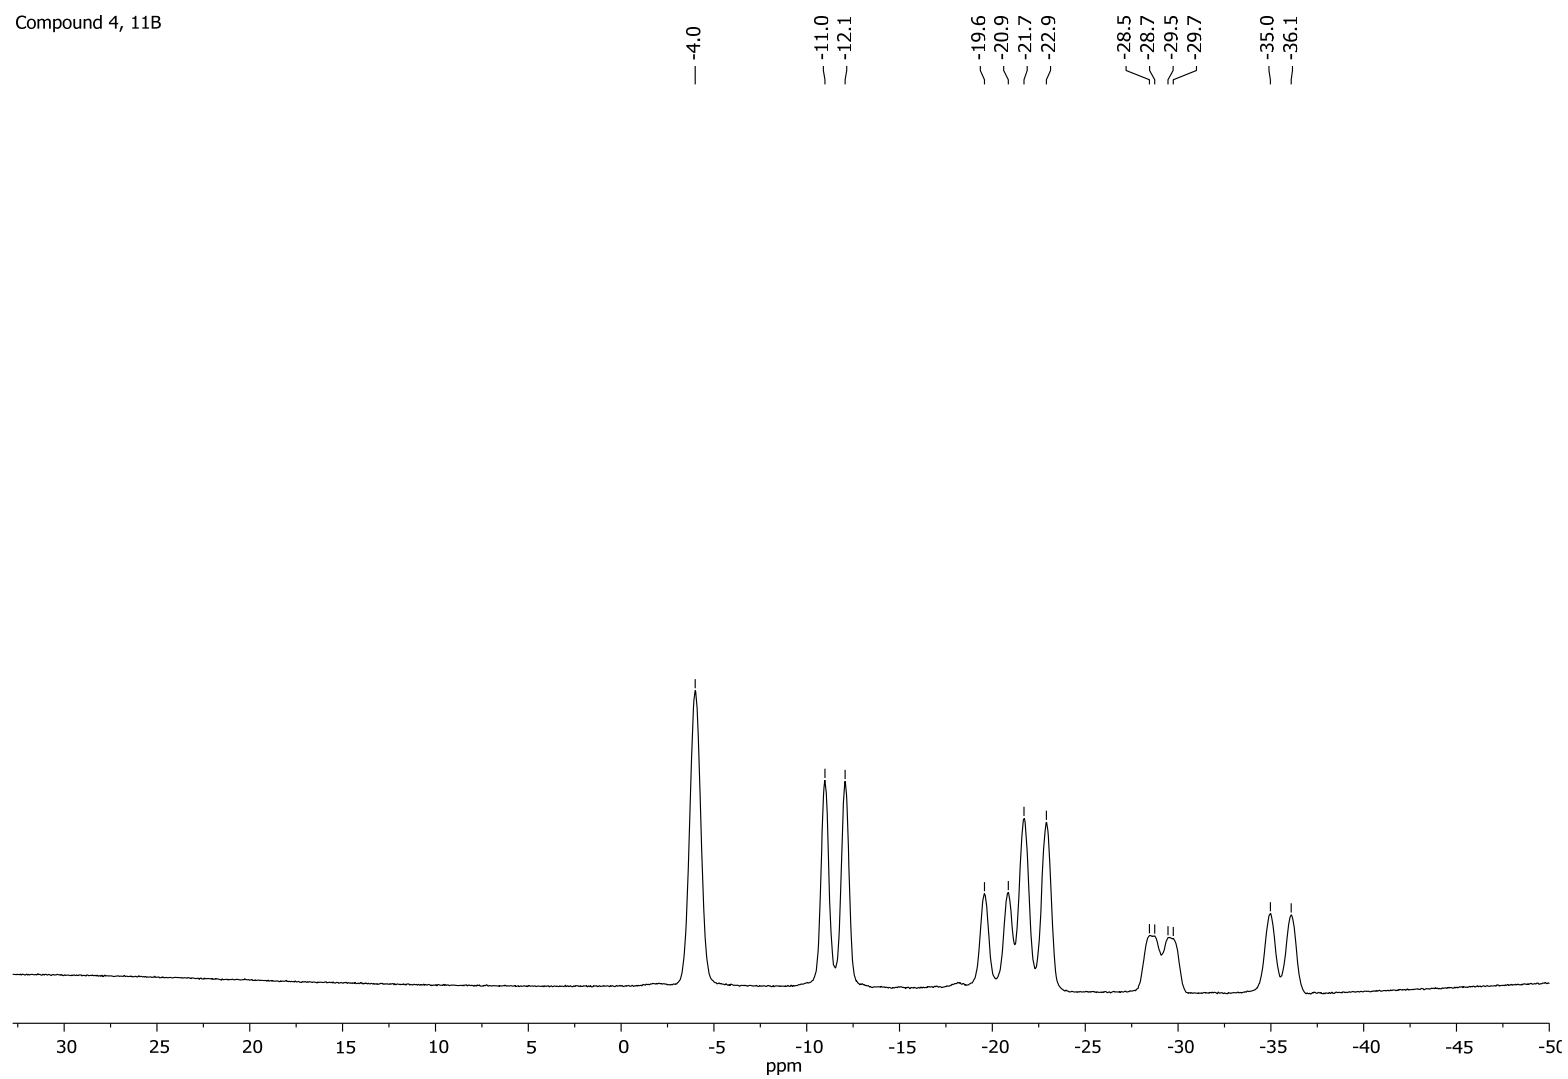

**Figure S24.**  $^{11}\text{B}$  NMR spectrum of  $(\text{Me}_3\text{NH})[5,6\text{-Cl}_2\text{-}7,8\text{-C}_2\text{B}_9\text{H}_{10}]$  in  $\text{acetone-}d_6$ .

Compound 4,  $^{13}\text{C}\{^1\text{H}\}$

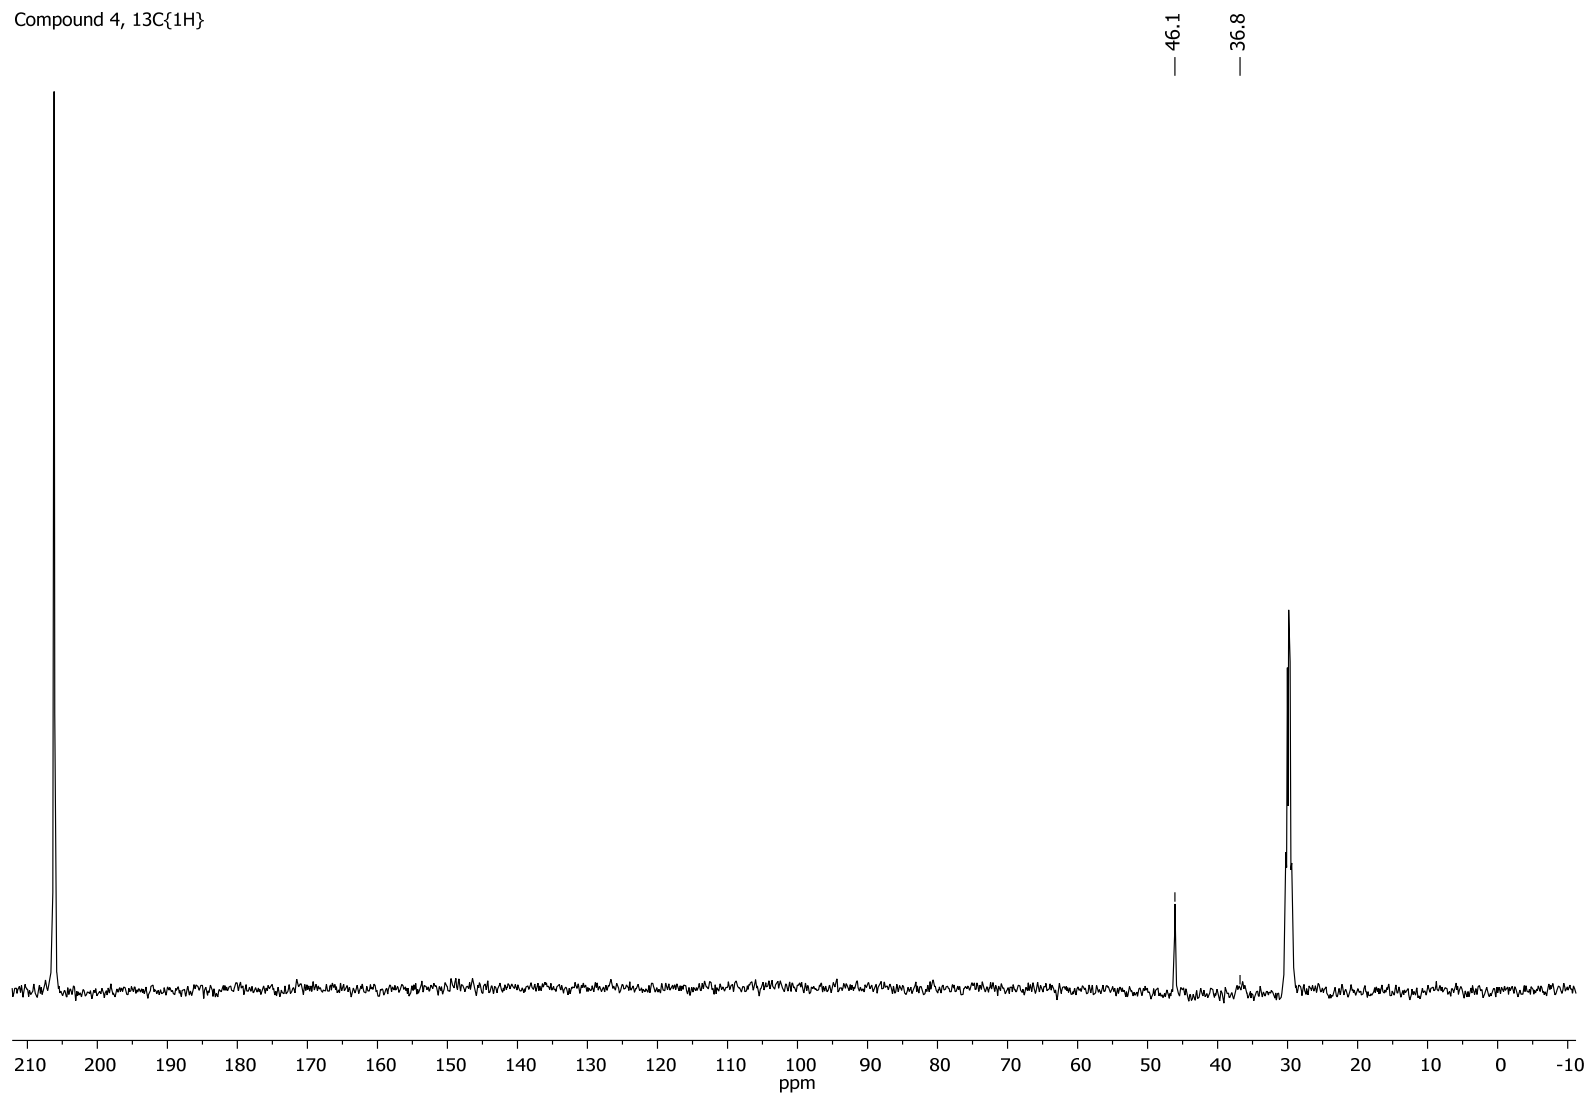

**Figure S25.**  $^{13}\text{C}$  NMR spectrum of  $(\text{Me}_3\text{NH})[5,6\text{-Cl}_2\text{-}7,8\text{-C}_2\text{B}_9\text{H}_{10}]$  in acetone- $d_6$ .

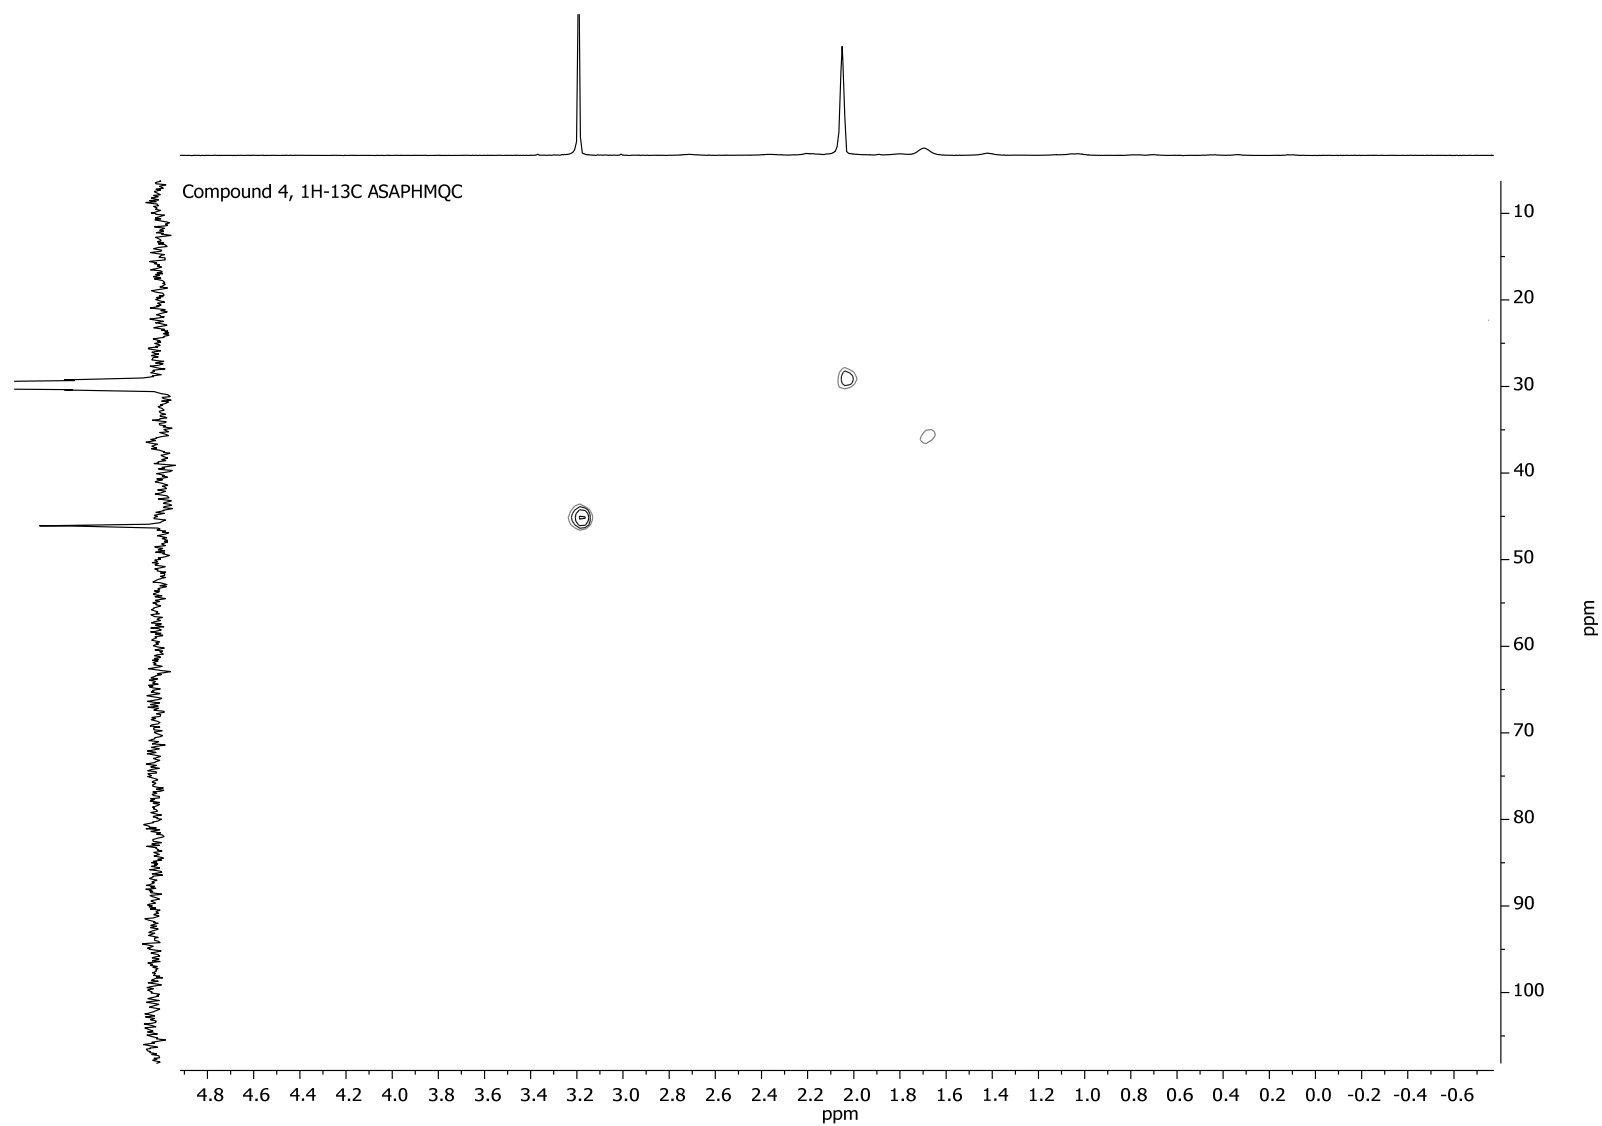

**Figure S26.**  $^1\text{H}$ - $^{13}\text{C}$  ASAPHMQC NMR spectrum of  $(\text{Me}_3\text{NH})[5,6\text{-Cl}_2\text{-}7,8\text{-C}_2\text{B}_9\text{H}_{10}]$  in acetone- $d_6$ .

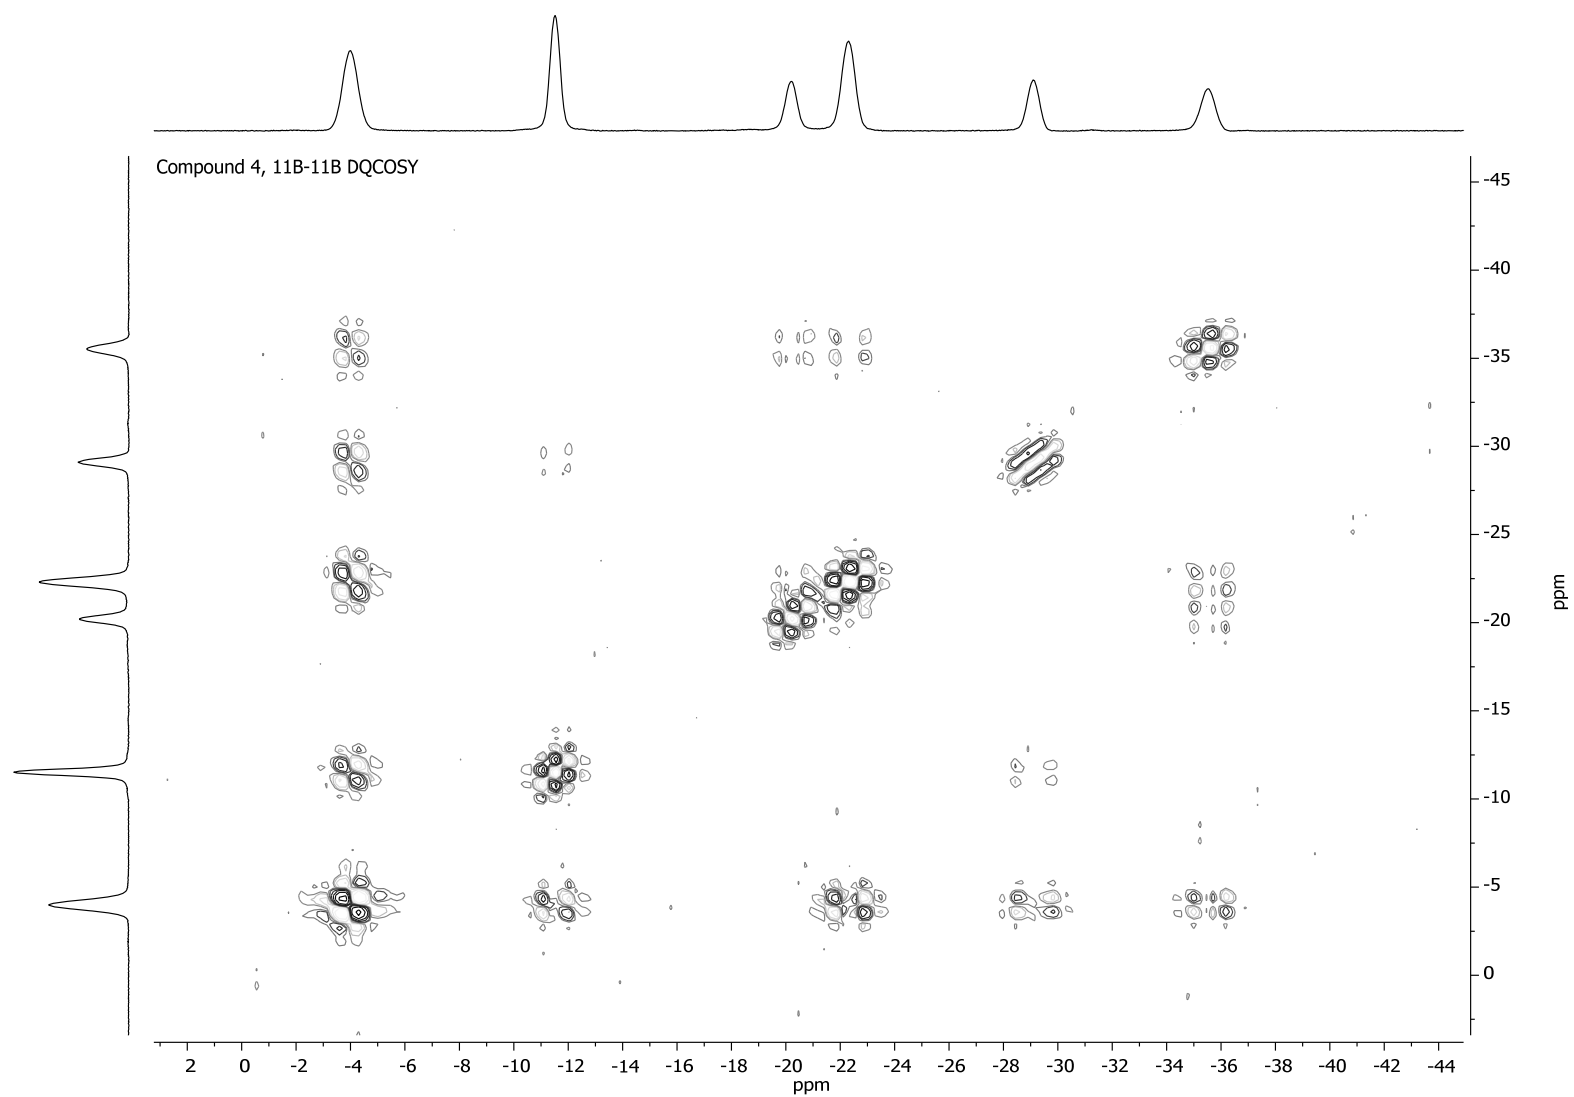

**Figure S27.**  $^{11}\text{B}$ - $^{11}\text{B}$  DQCOSY NMR spectrum of  $(\text{Me}_3\text{NH})[5,6\text{-Cl}_2\text{-}7,8\text{-C}_2\text{B}_9\text{H}_{10}]$  in acetone- $d_6$ .

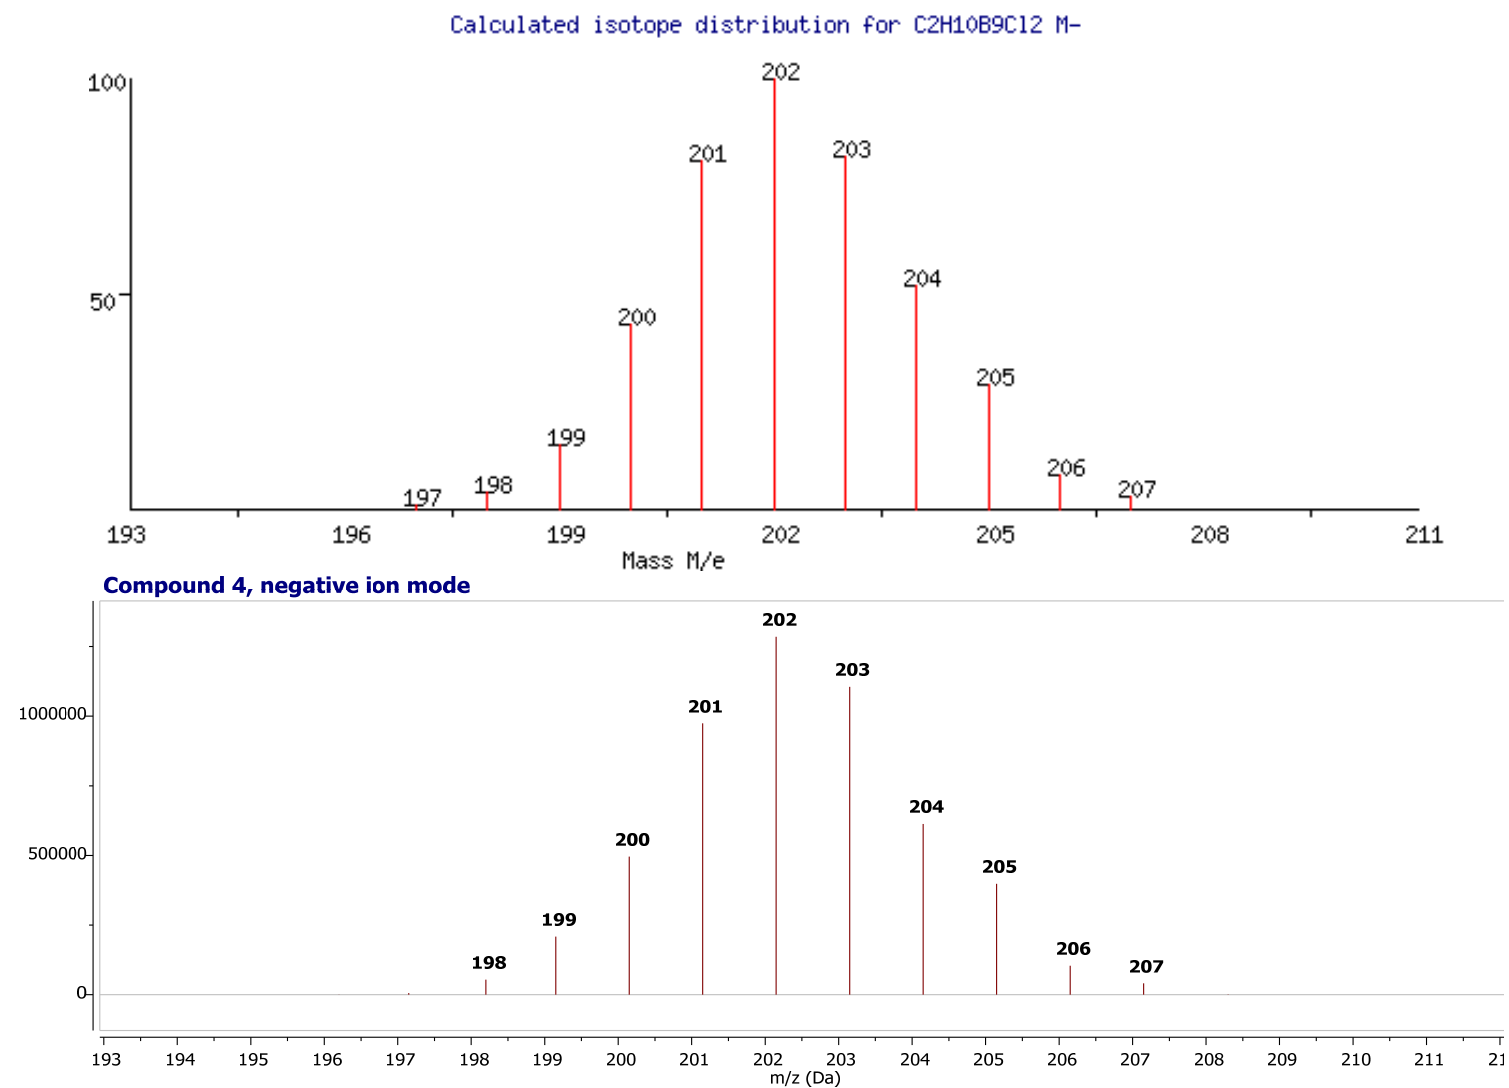

Figure S28. Mass-spectrum of the [5,6-Cl<sub>2</sub>-7,8-C<sub>2</sub>B<sub>9</sub>H<sub>10</sub>]<sup>-</sup> anion.

Compound 5, 1H

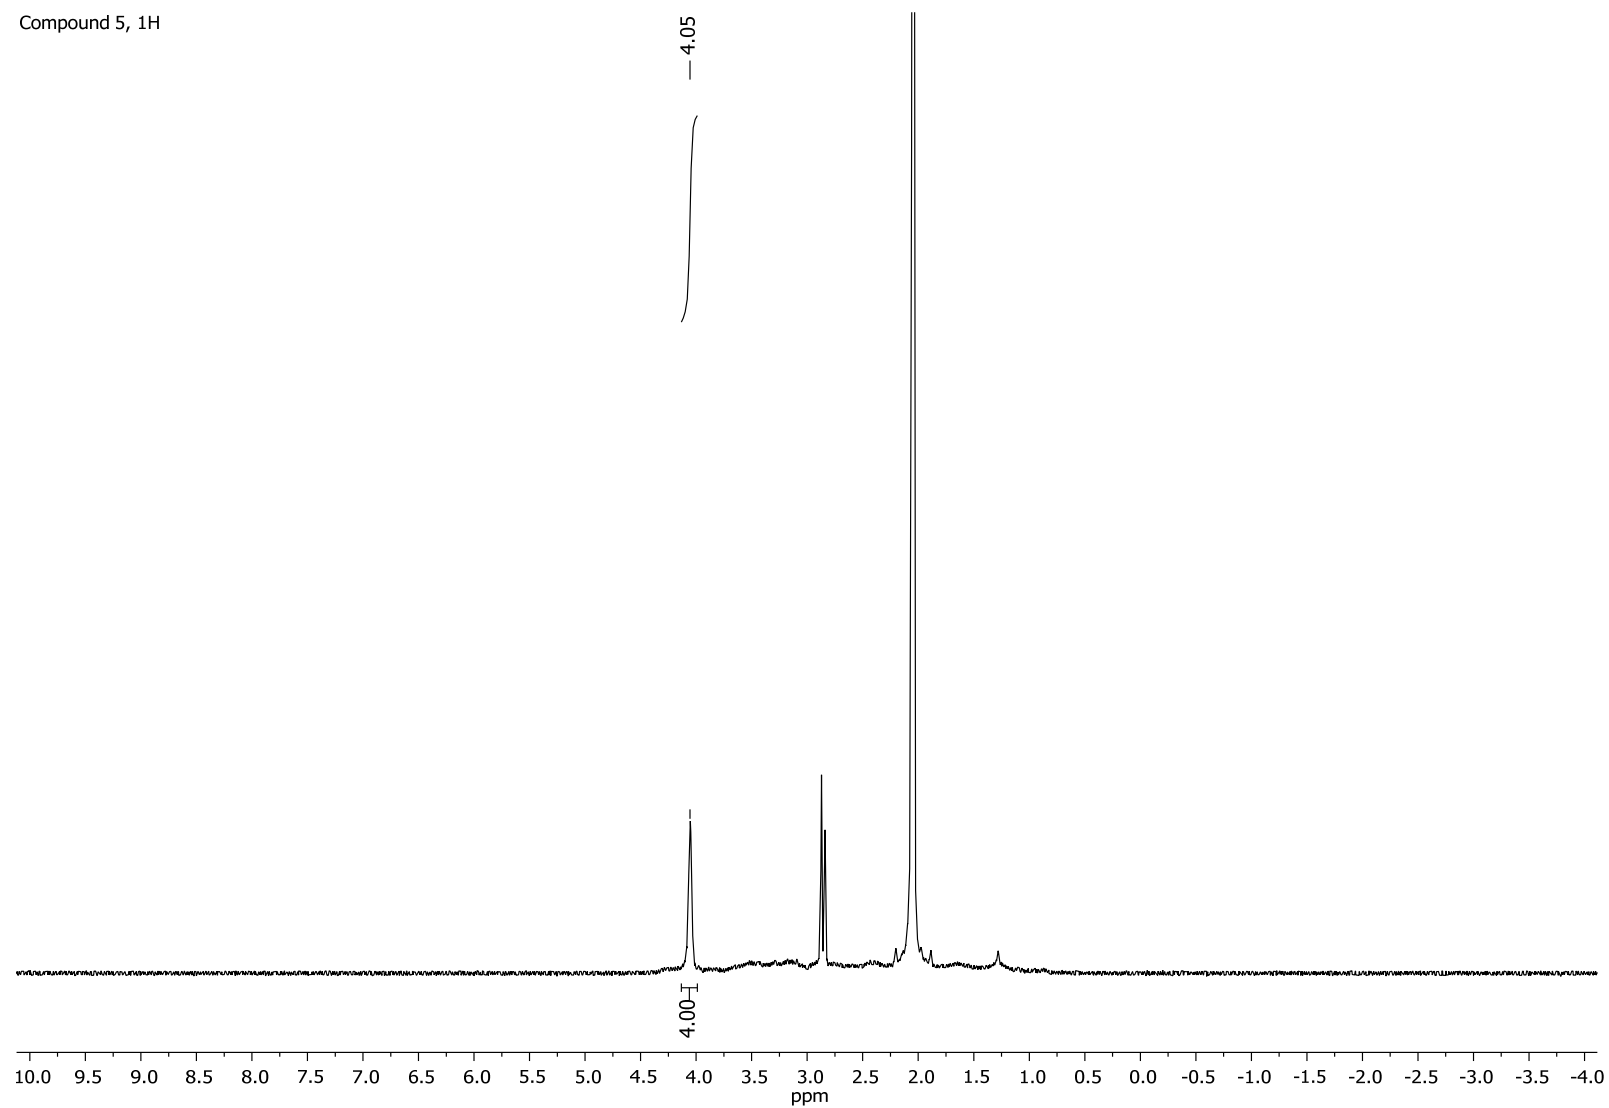

**Figure S29.**  $^1\text{H}$  NMR spectrum of  $\text{K}[9,9',12,12'\text{-Cl}_4\text{-}3,3'\text{-Co}(1,2\text{-C}_2\text{B}_9\text{H}_9)_2]$  in acetone- $d_6$ .

Compound 5,  $^{11}\text{B}\{^1\text{H}\}$

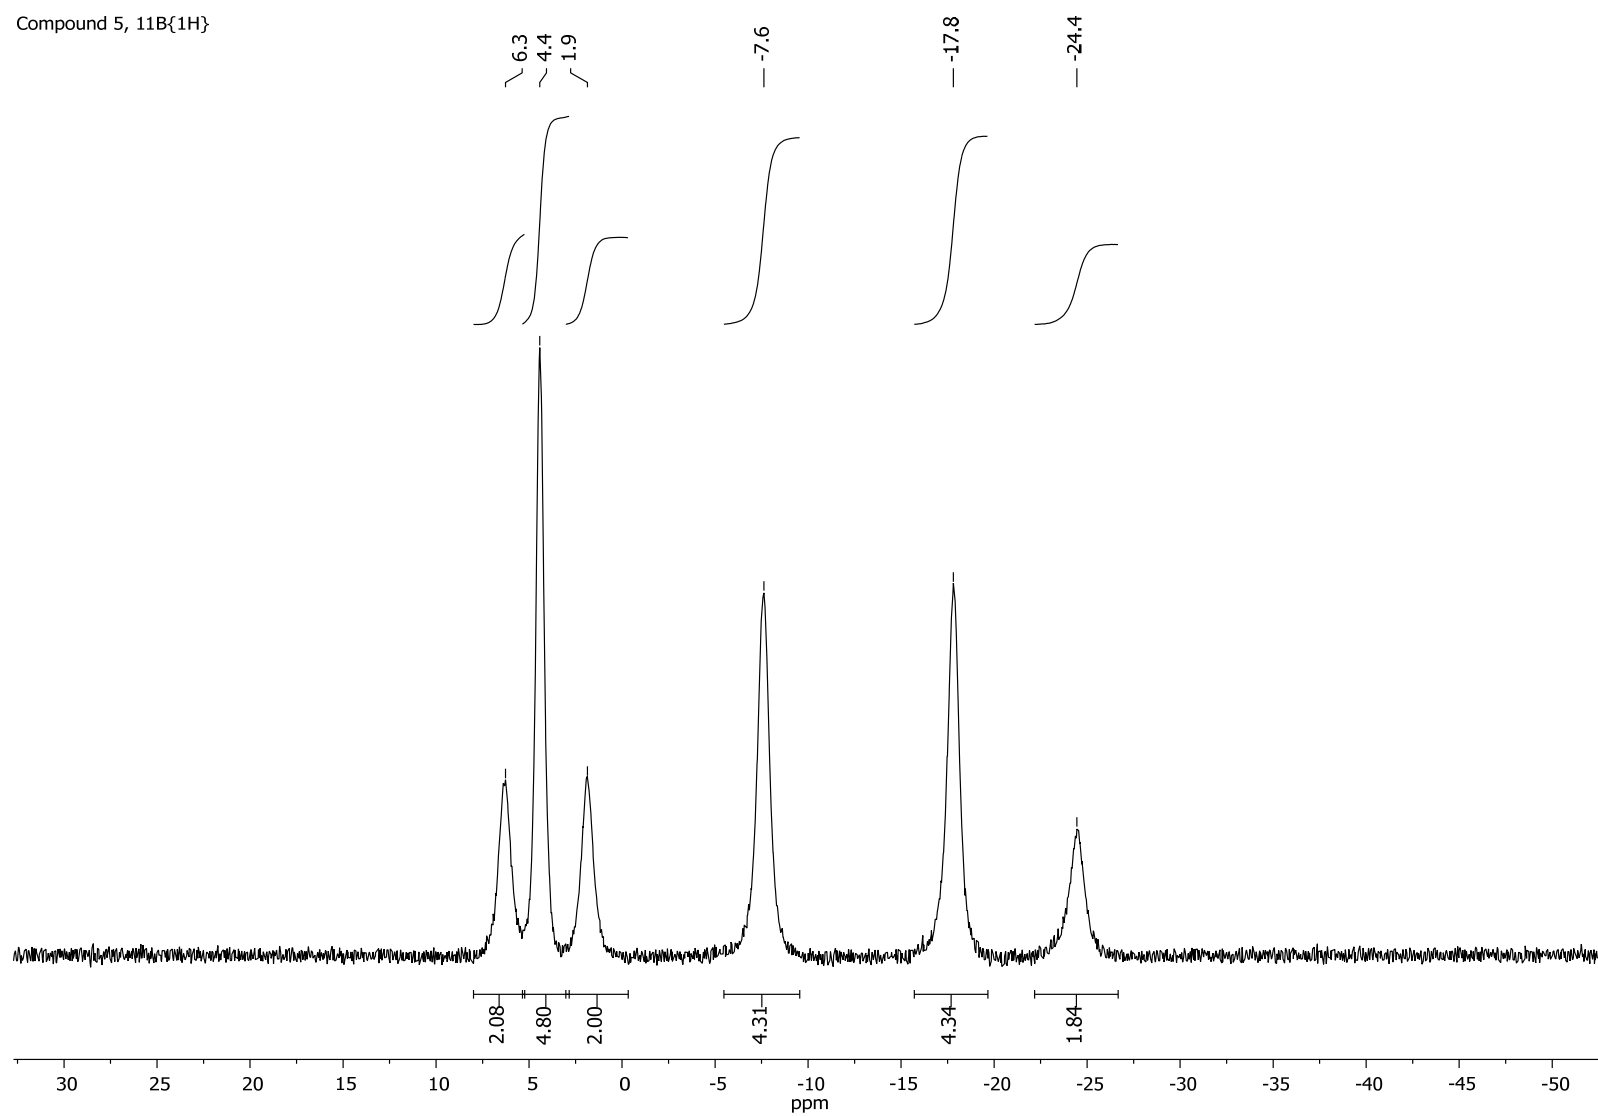

Figure S30.  $^1\text{H}\{^{11}\text{B}\}$  NMR spectrum of  $\text{K}[9,9',12,12'\text{-Cl}_4\text{-3,3'-Co}(1,2\text{-C}_2\text{B}_9\text{H}_9)_2]$  in acetone- $d_6$ .

Compound 5, 11B

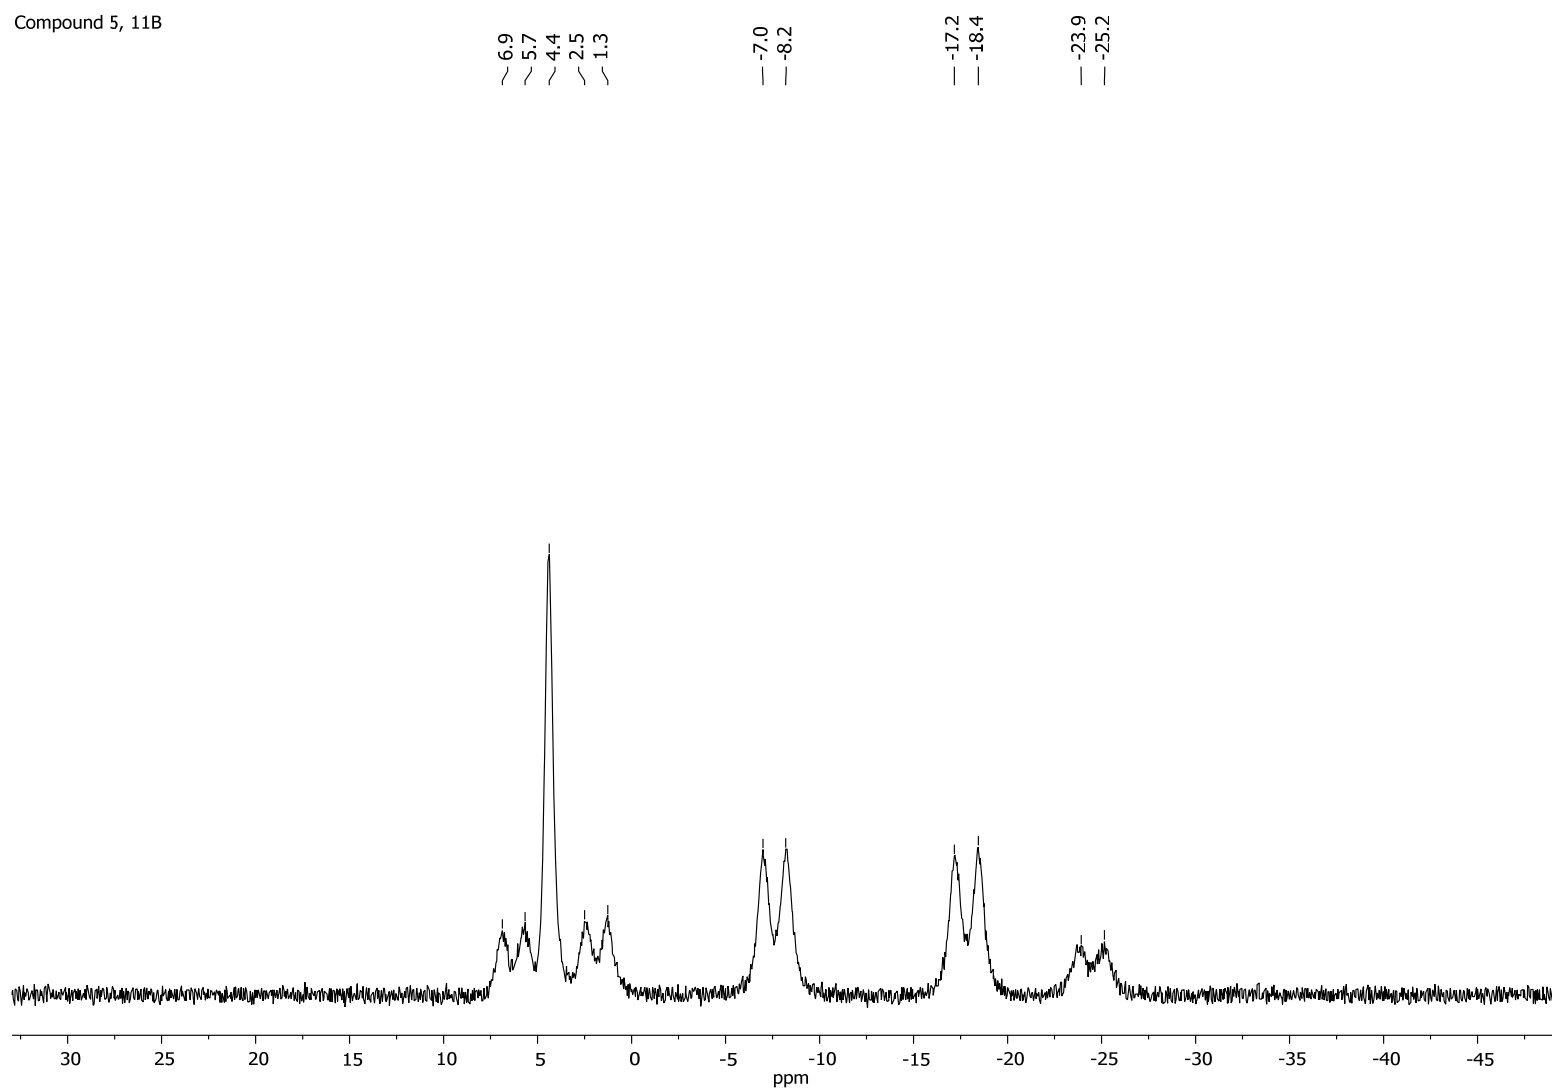

**Figure S31.**  $^{11}\text{B}$  NMR spectrum of  $\text{K}[9,9',12,12'\text{-Cl}_4\text{-}3,3'\text{-Co}(1,2\text{-C}_2\text{B}_9\text{H}_9)_2]$  in  $\text{acetone-}d_6$ .

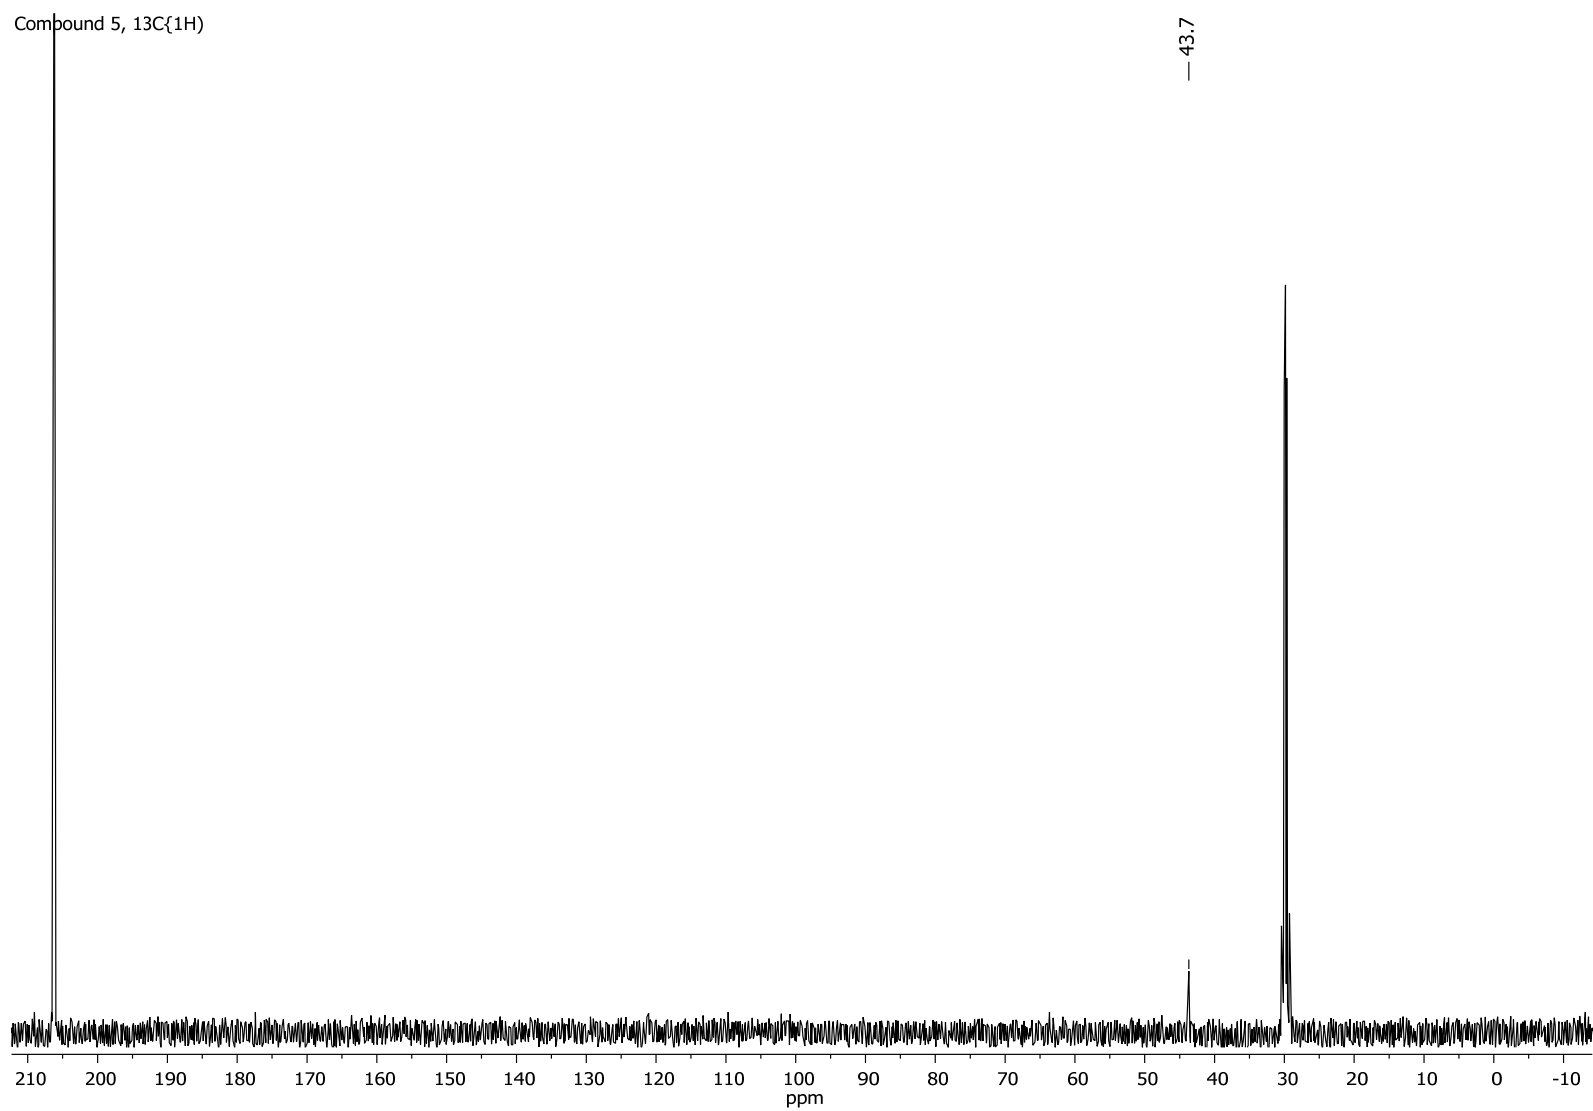

**Figure S32.**  $^{13}\text{C}$  NMR spectrum of  $\text{K}[9,9',12,12'\text{-Cl}_4\text{-3,3'}\text{-Co}(1,2\text{-C}_2\text{B}_9\text{H}_9)_2]$  in acetone- $d_6$ .

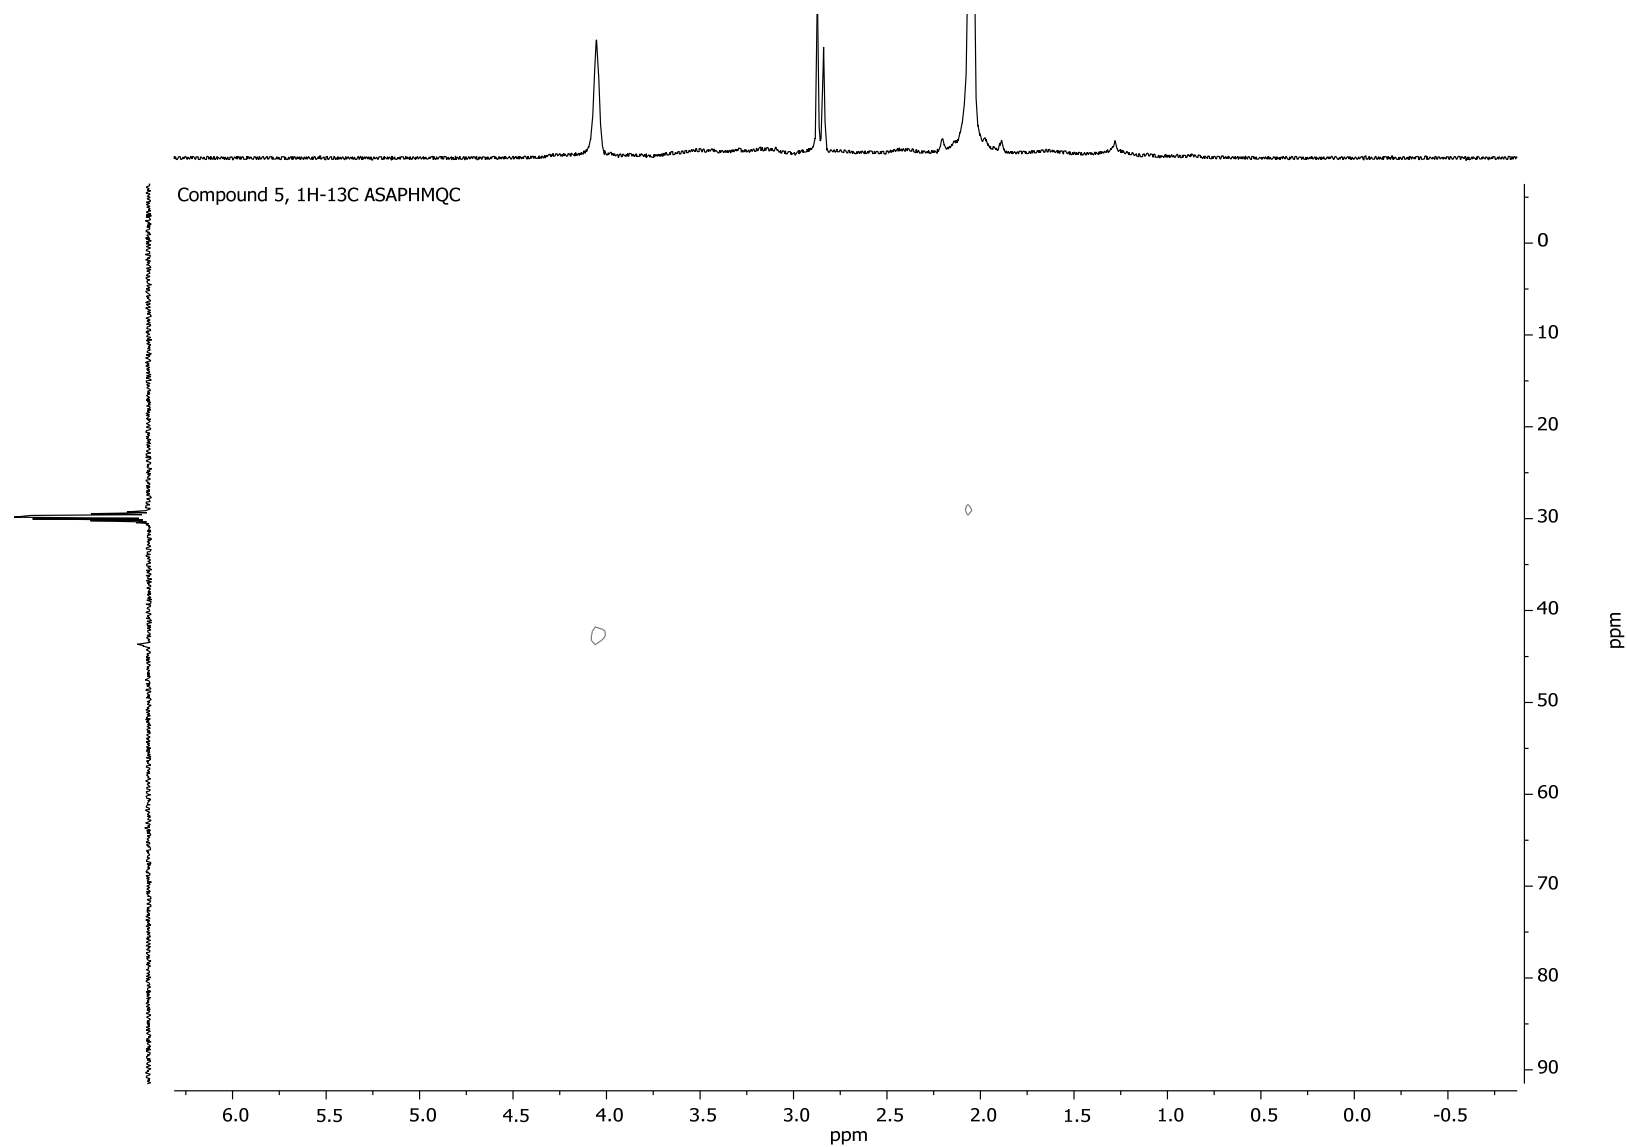

**Figure S33.**  $^1\text{H}$ - $^{13}\text{C}$  ASAPHMQC NMR spectrum of  $\text{K}[9,9',12,12'\text{-Cl}_4\text{-}3,3'\text{-Co}(1,2\text{-C}_2\text{B}_9\text{H}_9)_2]$  in acetone- $d_6$ .

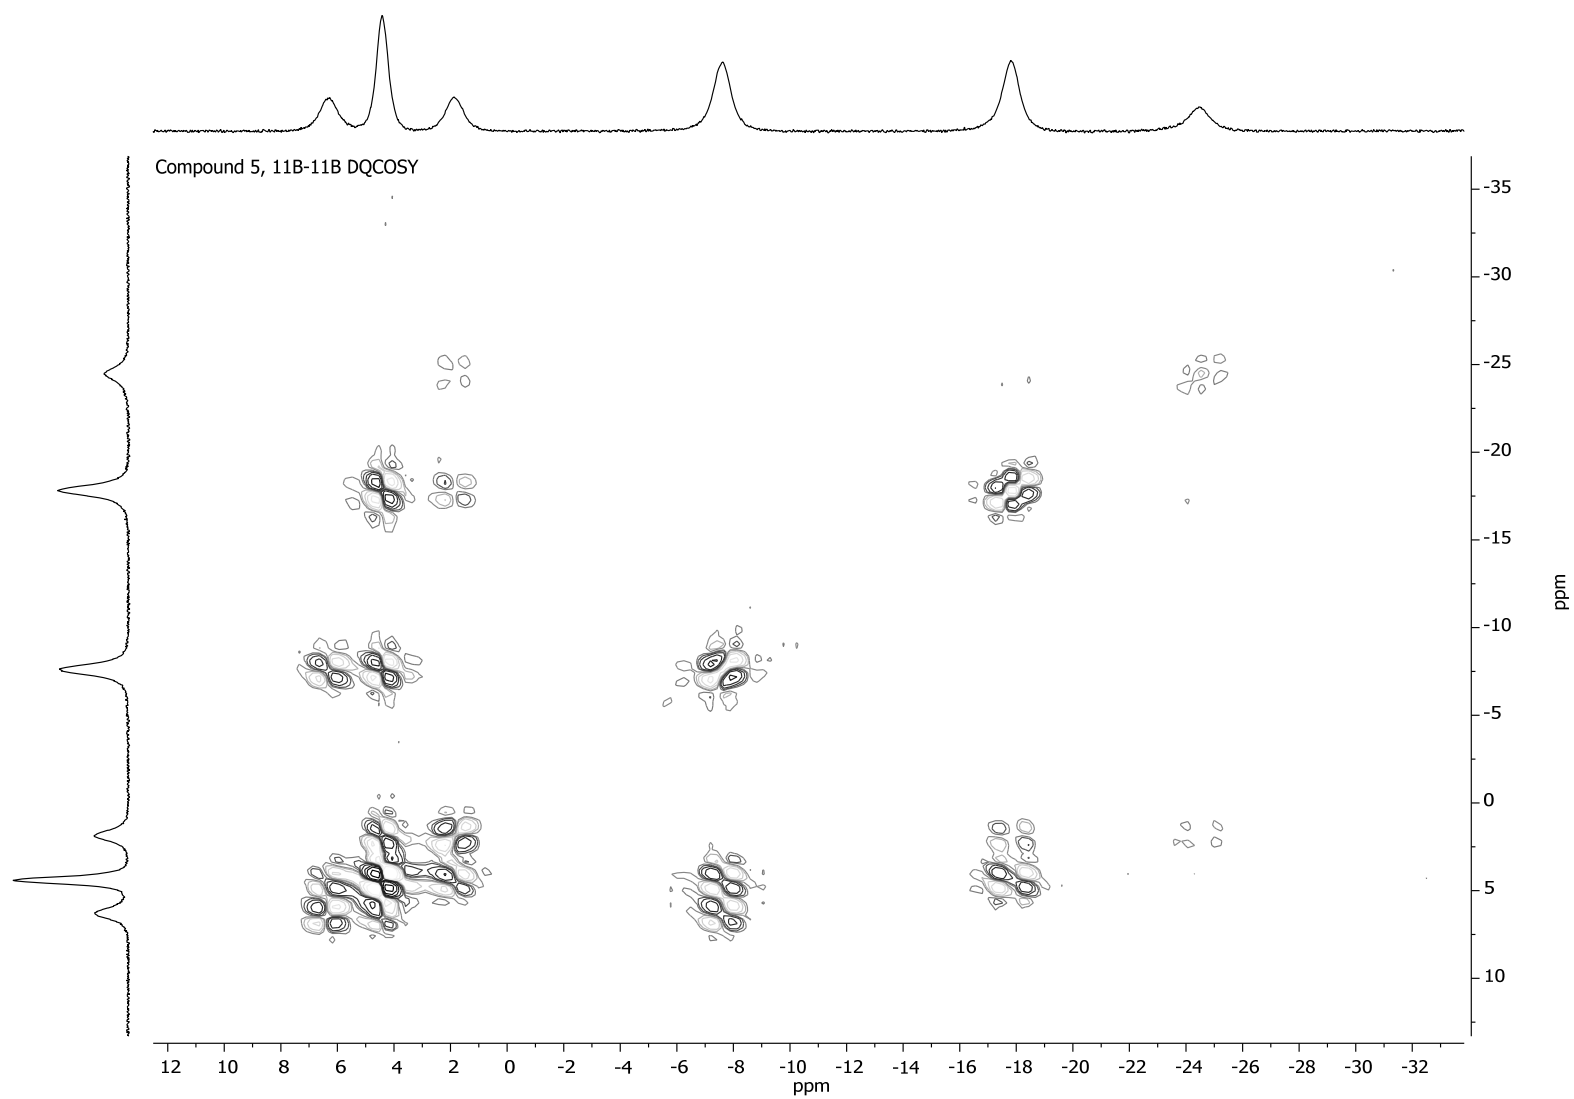

**Figure S34.**  $^{11}\text{B}$ - $^{11}\text{B}$  DQCOSY NMR spectrum of  $\text{K}[9,9',12,12'\text{-Cl}_4\text{-}3,3'\text{-Co}(1,2\text{-C}_2\text{B}_9\text{H}_9)_2]$  in acetone- $d_6$ .

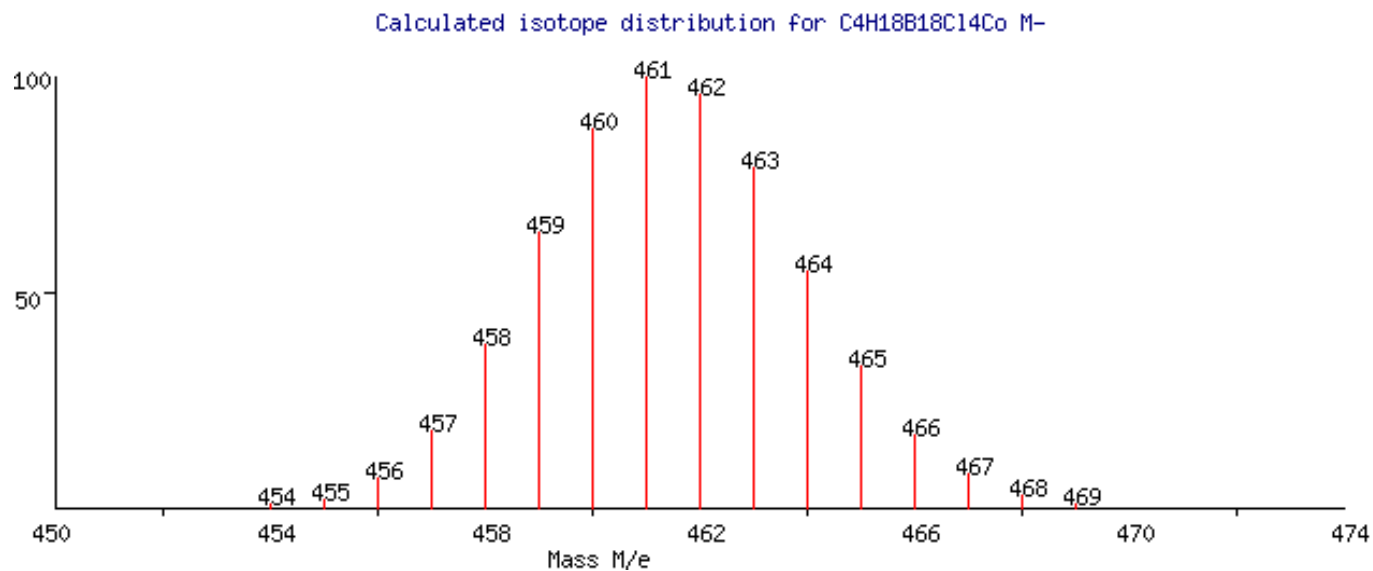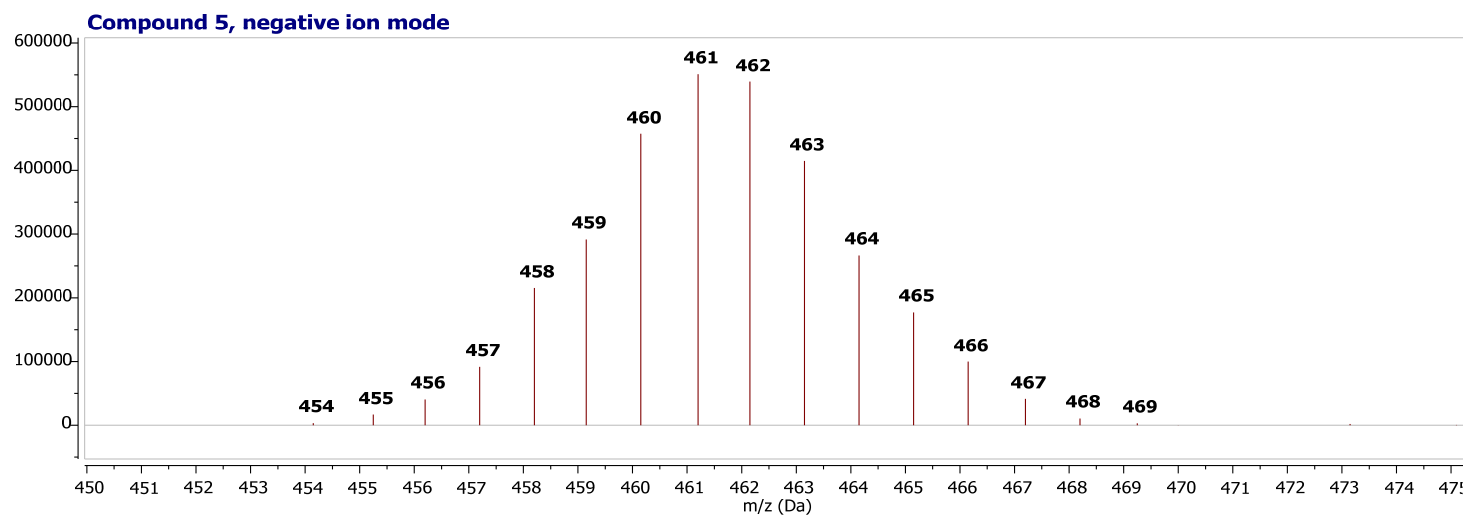

Figure S35. Mass-spectrum of the [9,9',12,12'-Cl<sub>4</sub>-3,3'-Co(1,2-C<sub>2</sub>B<sub>9</sub>H<sub>9</sub>)<sub>2</sub>]<sup>-</sup> anion.

Compound 6,  $^1\text{H}$

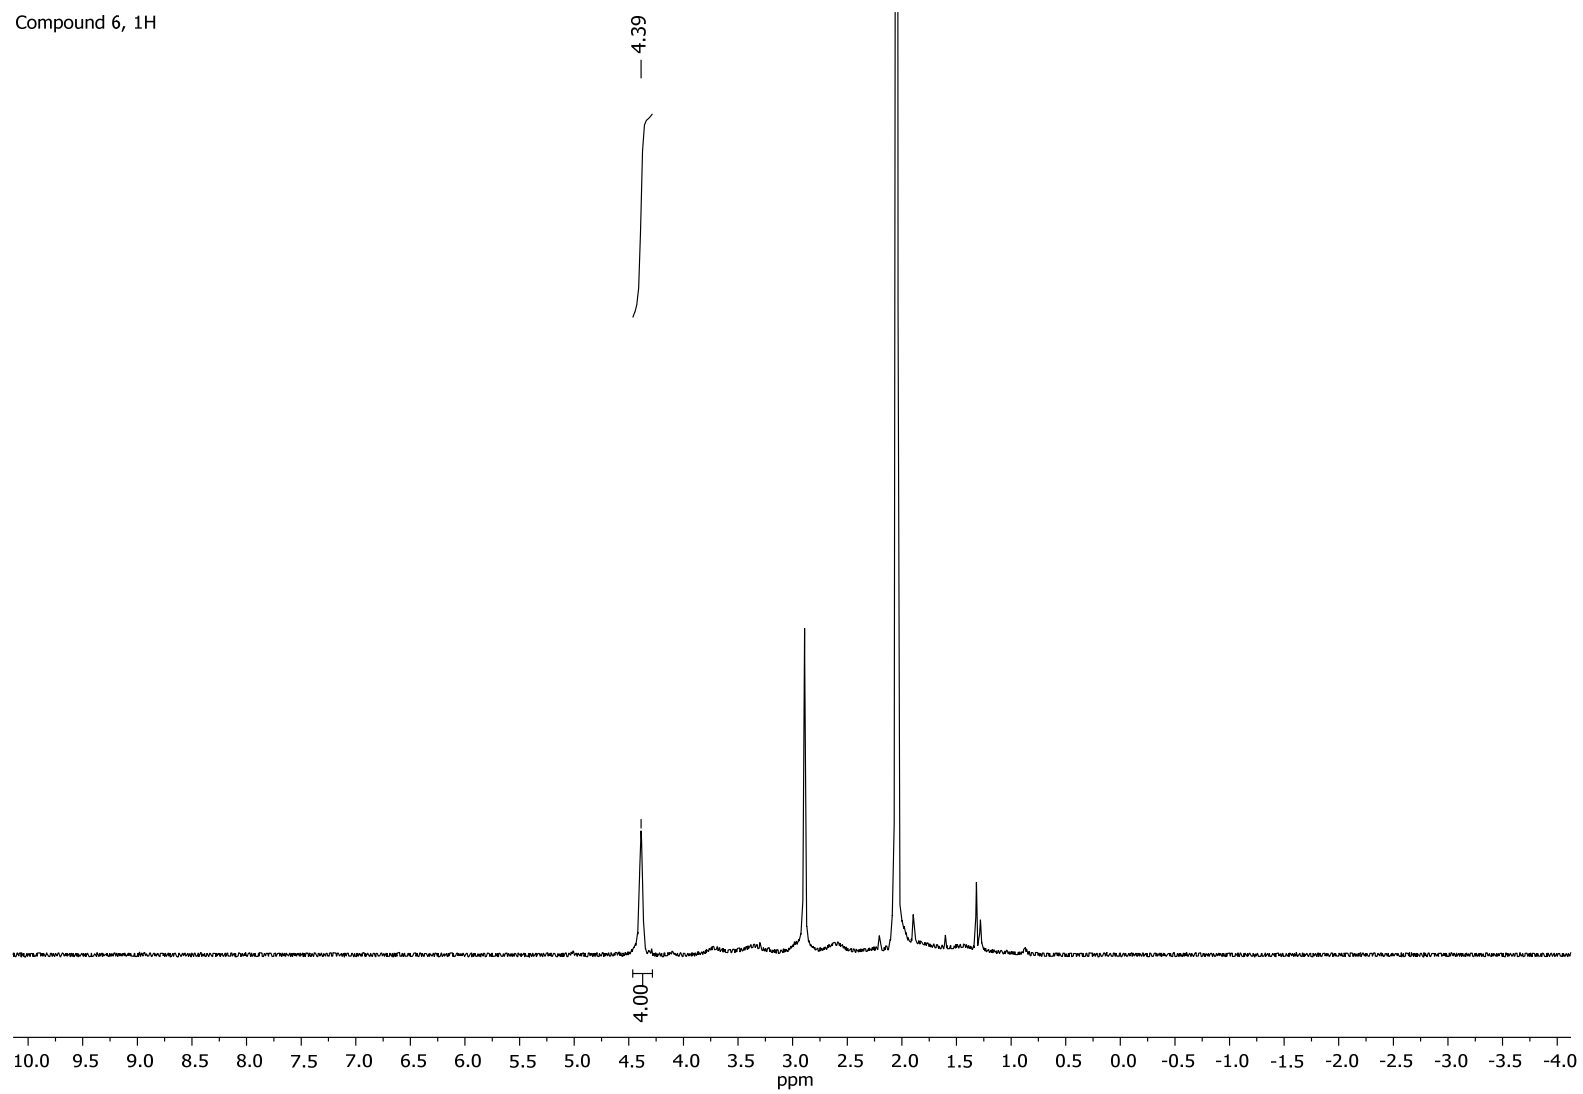

**Figure S36.**  $^1\text{H}$  NMR spectrum of  $\text{Cs}[8,8',9,9',12,12'\text{-Cl}_6\text{-}3,3'\text{-Co}(1,2\text{-C}_2\text{B}_9\text{H}_8)_2]$  in acetone- $d_6$ .

Compound 6,  $^{11}\text{B}\{^1\text{H}\}$

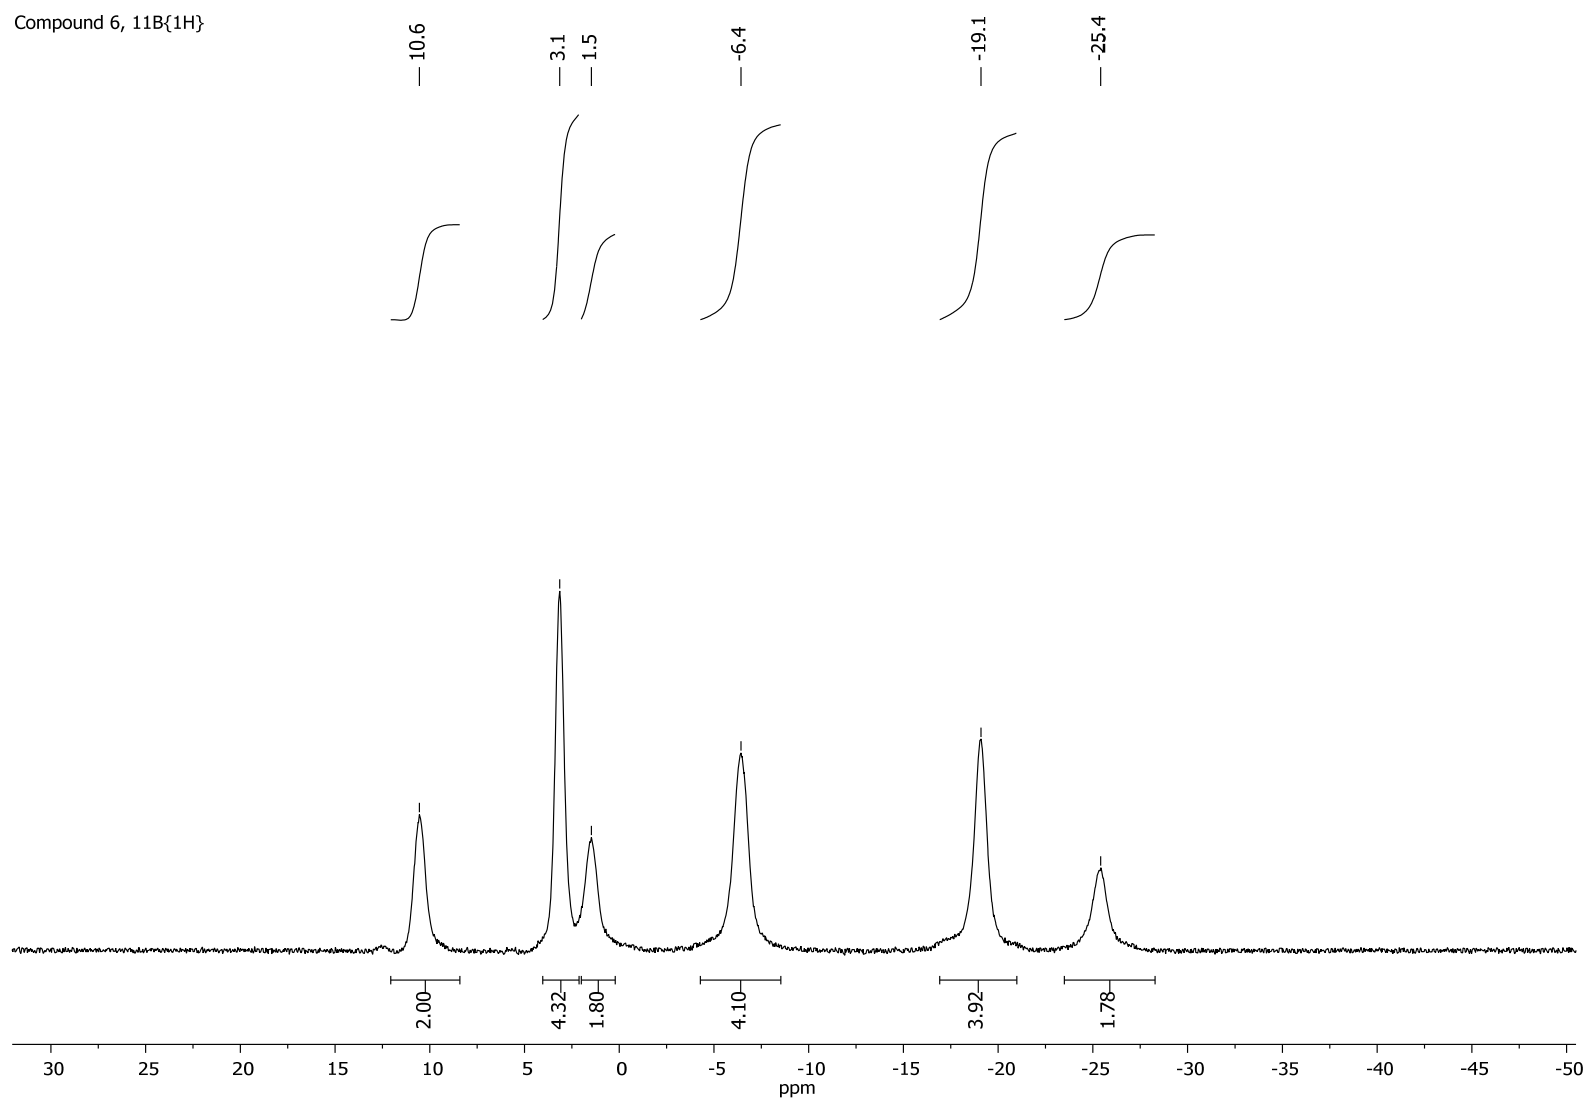

**Figure S36.**  $^{11}\text{B}\{^1\text{H}\}$  NMR spectrum of  $\text{Cs}[8,8',9,9',12,12'\text{-Cl}_6\text{-}3,3'\text{-Co}(1,2\text{-C}_2\text{B}_9\text{H}_8)_2]$  in  $\text{acetone-}d_6$ .

Compound 6, 11B

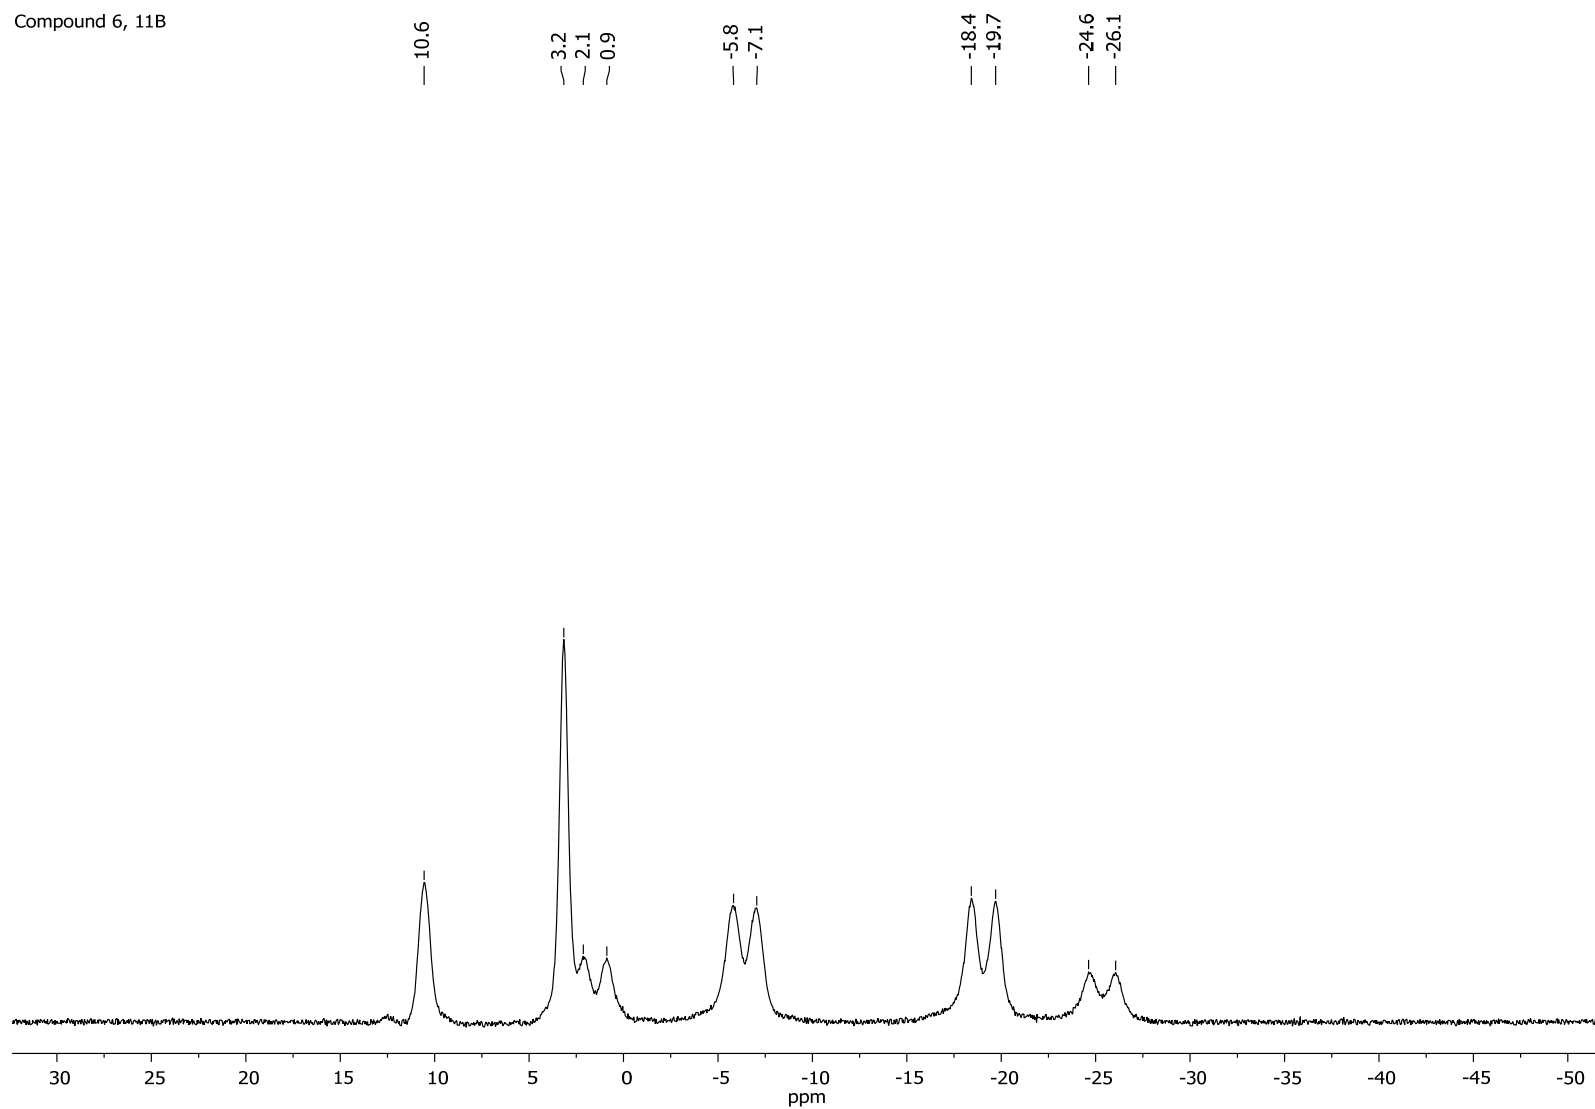

**Figure S38.**  $^{11}\text{B}$  NMR spectrum of  $\text{Cs}[8,8',9,9',12,12'\text{-Cl}_6\text{-}3,3'\text{-Co}(1,2\text{-C}_2\text{B}_9\text{H}_8)_2]$  in  $\text{acetone-}d_6$ .

Compound 6,  $^{13}\text{C}\{^1\text{H}\}$

— 50.5

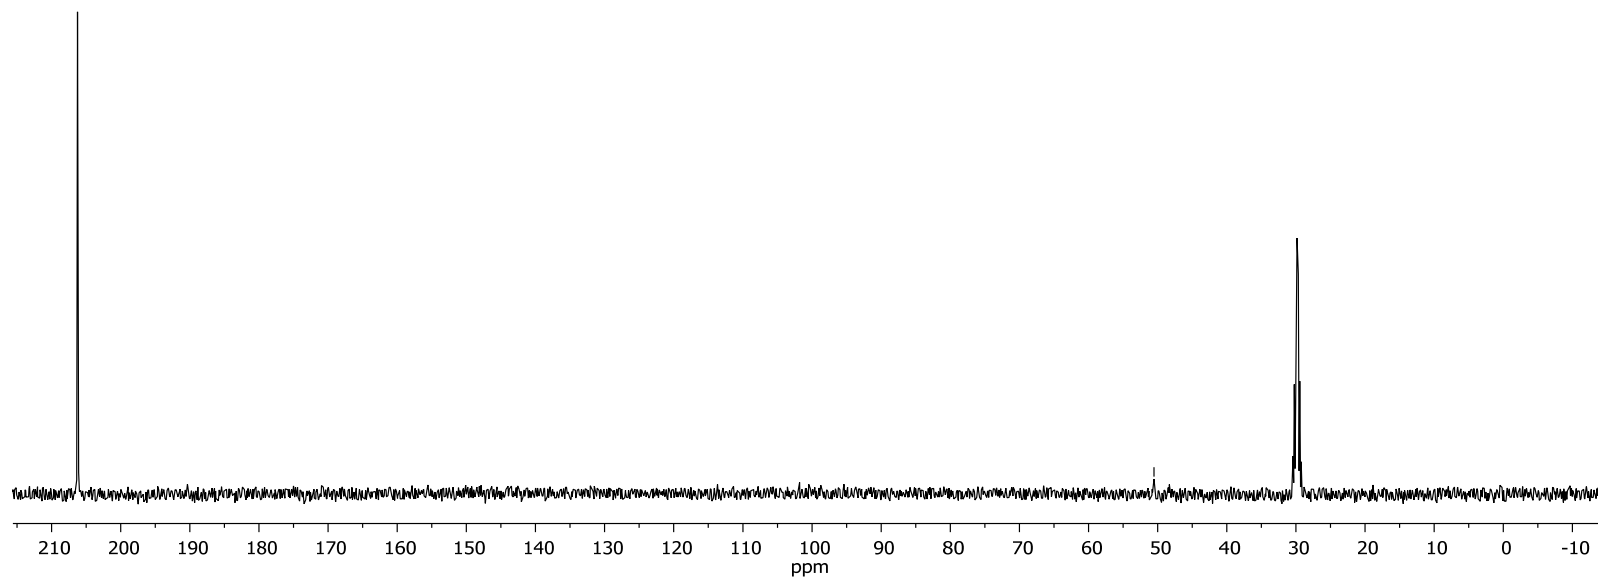

**Figure S39.**  $^{13}\text{C}$  NMR spectrum of  $\text{Cs}[8,8',9,9',12,12'\text{-Cl}_6\text{-}3,3'\text{-Co}(1,2\text{-C}_2\text{B}_9\text{H}_8)_2]$  in acetone- $d_6$ .

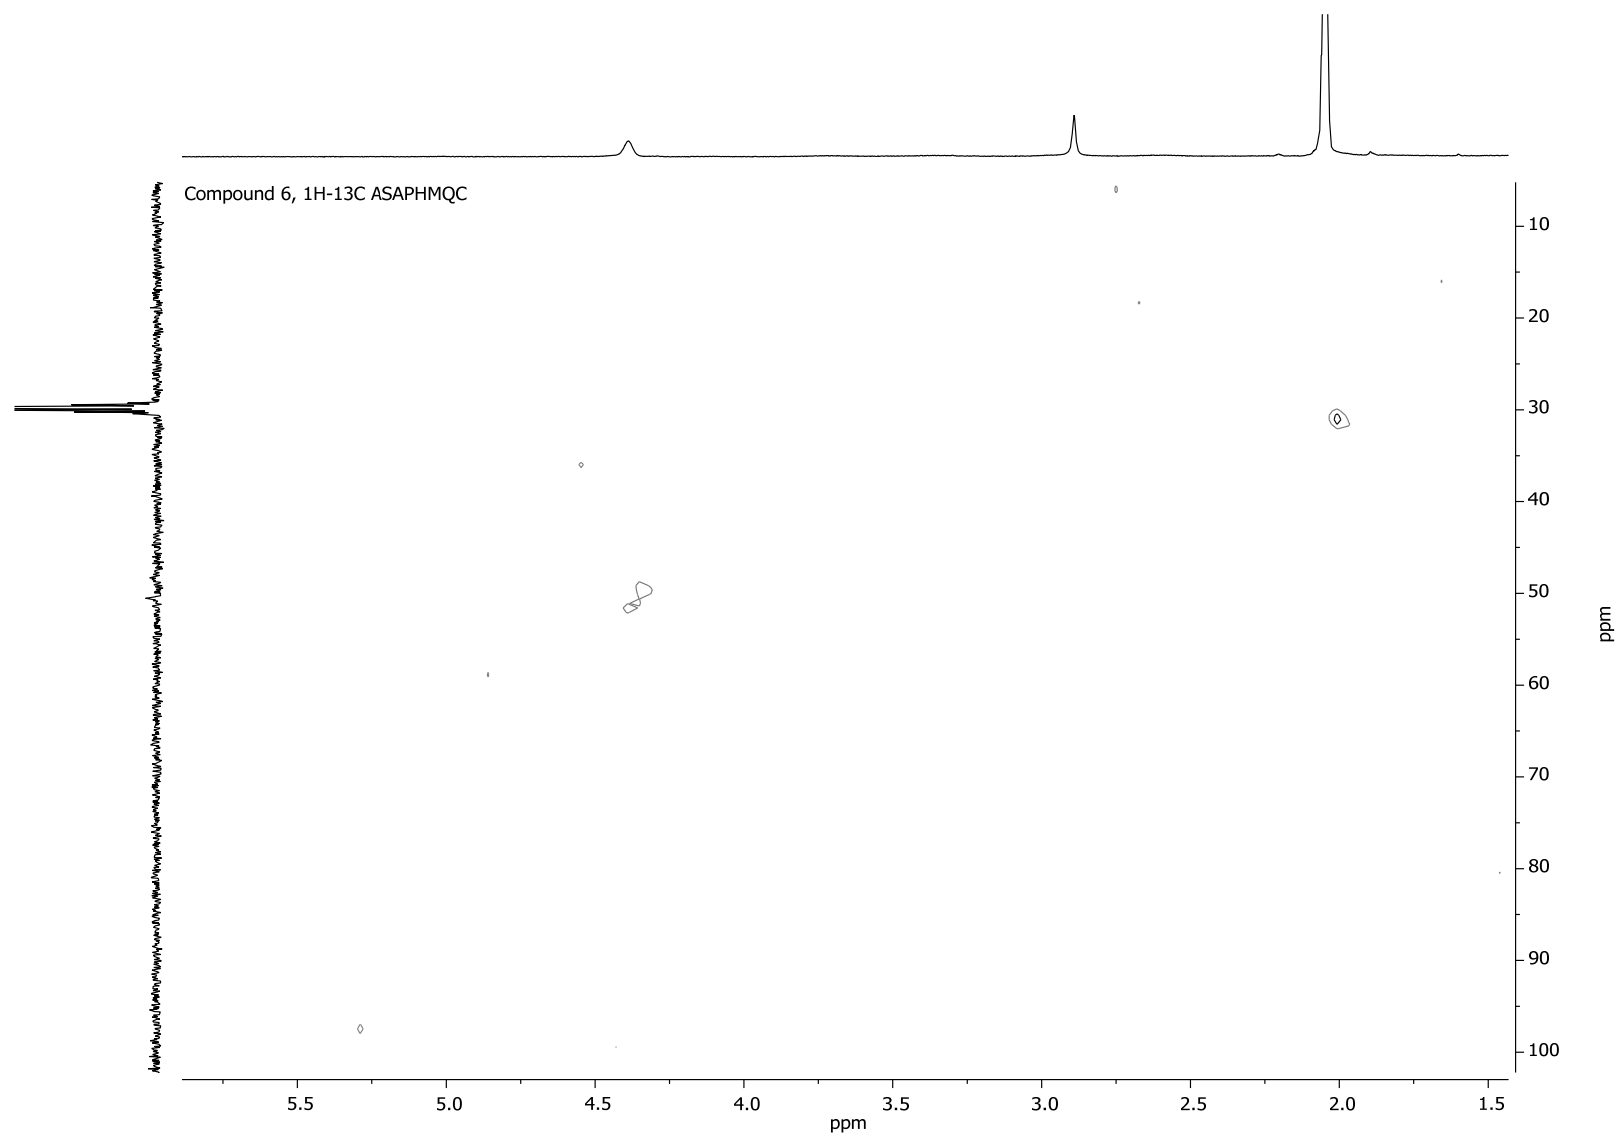

**Figure S40.** <sup>1</sup>H-<sup>13</sup>C ASAPHMQC NMR spectrum of Cs[8,8',9,9',12,12'-Cl<sub>6</sub>-3,3'-Co(1,2-C<sub>2</sub>B<sub>9</sub>H<sub>8</sub>)<sub>2</sub>] in acetone-*d*<sub>6</sub>.

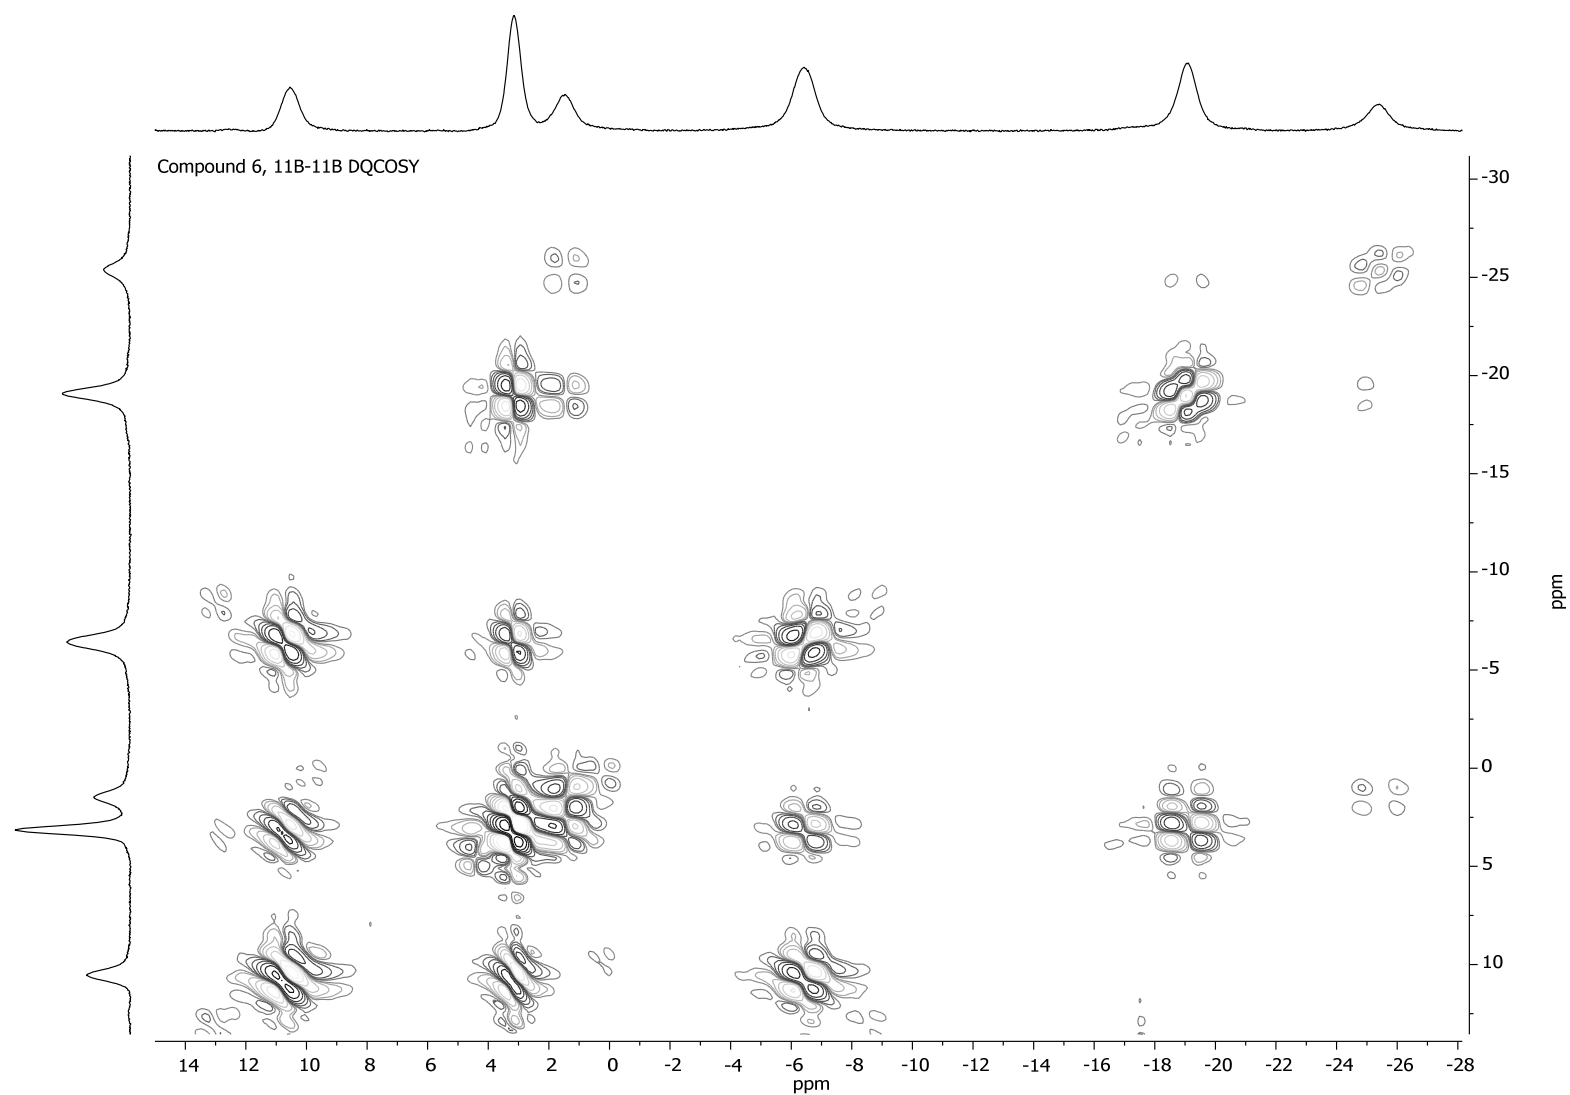

**Figure S41.**  $^{11}\text{B}$ - $^{11}\text{B}$  DQCOSY NMR spectrum of  $\text{Cs}[8,8',9,9',12,12'\text{-Cl}_6\text{-}3,3'\text{-Co}(1,2\text{-C}_2\text{B}_9\text{H}_8)_2]$  in acetone- $d_6$ .

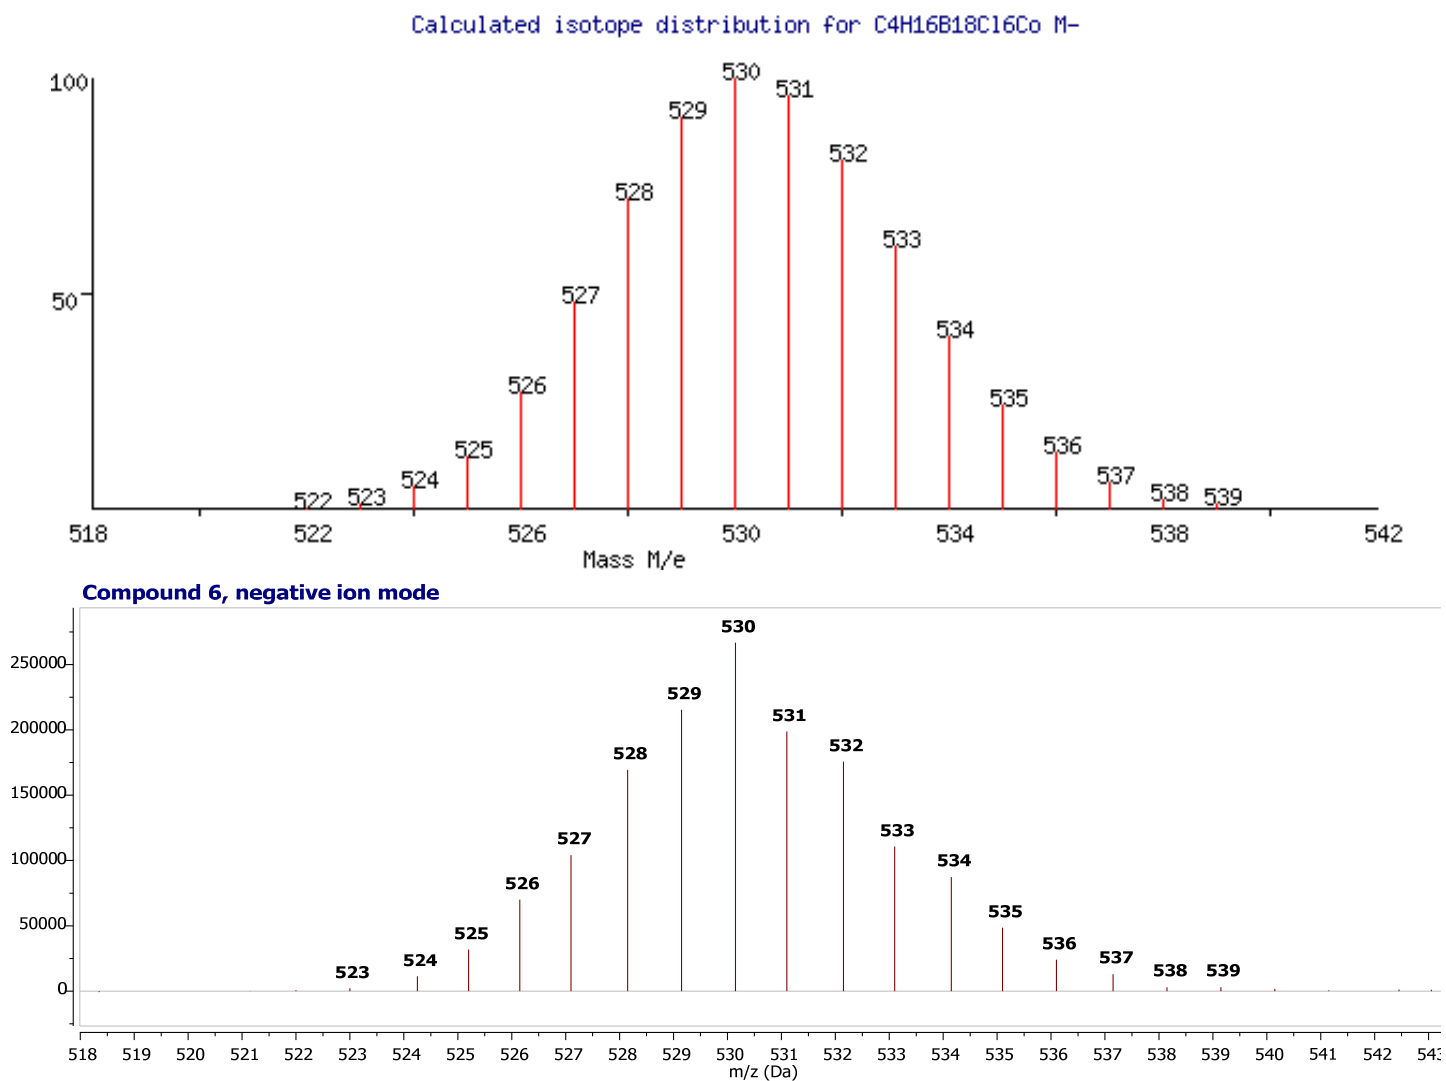

Figure S42. Mass-spectrum of the [8,8',9,9',12,12'-Cl<sub>6</sub>-3,3'-Co(1,2-C<sub>2</sub>B<sub>9</sub>H<sub>8</sub>)<sub>2</sub>]<sup>-</sup> anion.
