# Supplementary material
Source: MDPI journal article supplement (https://www.mdpi.com/2073-4352/12/9/1251)
Supplement: s1 [file s1 › Compound 2.cif]

 
data_siv61
 
_audit_creation_method            SHELXL-2014/6
_chemical_name_systematic         ?
_chemical_name_common             ?
_chemical_melting_point           ?
_chemical_formula_moiety          
 'C2 H10 B10 Cl2' 
_chemical_formula_sum
 'C2 H10 B10 Cl2' 
_chemical_formula_weight          213.10

loop_
 _atom_type_symbol
 _atom_type_description
 _atom_type_scat_dispersion_real
 _atom_type_scat_dispersion_imag
 _atom_type_scat_source
 'C'  'C'   0.0033   0.0016
 'International Tables Vol C Tables 4.2.6.8 and 6.1.1.4'
 'H'  'H'   0.0000   0.0000
 'International Tables Vol C Tables 4.2.6.8 and 6.1.1.4'
 'B'  'B'   0.0013   0.0007
 'International Tables Vol C Tables 4.2.6.8 and 6.1.1.4'
 'Cl'  'Cl'   0.1484   0.1585
 'International Tables Vol C Tables 4.2.6.8 and 6.1.1.4'
 
_space_group_crystal_system       orthorhombic
_space_group_IT_number            33
_space_group_name_H-M_alt         'P n a 21'
_space_group_name_Hall            'P 2c -2n'
 
_shelx_space_group_comment
;
The symmetry employed for this shelxl refinement is uniquely defined
by the following loop, which should always be used as a source of
symmetry information in preference to the above space-group names.
They are only intended as comments.
;
 
loop_
 _space_group_symop_operation_xyz
 'x, y, z'
 '-x, -y, z+1/2'
 'x+1/2, -y+1/2, z'
 '-x+1/2, y+1/2, z+1/2'
 
_cell_length_a                    12.6461(7)
_cell_length_b                    7.1946(4)
_cell_length_c                    11.4596(7)
_cell_angle_alpha                 90
_cell_angle_beta                  90
_cell_angle_gamma                 90
_cell_volume                      1042.64(10)
_cell_formula_units_Z             4
_cell_measurement_temperature     120(2)
_cell_measurement_reflns_used     5804
_cell_measurement_theta_min       3.22
_cell_measurement_theta_max       28.61
 
_exptl_crystal_description        prizm
_exptl_crystal_colour             'colorless'
_exptl_crystal_density_meas       ?
_exptl_crystal_density_method     ?
_exptl_crystal_density_diffrn     1.358          
_exptl_crystal_F_000              424
_exptl_transmission_factor_min    ?
_exptl_transmission_factor_max    ?
_exptl_crystal_size_max           0.024
_exptl_crystal_size_mid           0.021
_exptl_crystal_size_min           0.014
_exptl_absorpt_coefficient_mu     0.557
_shelx_estimated_absorpt_T_min    ?
_shelx_estimated_absorpt_T_max    ?
_exptl_absorpt_correction_type    'multi-scan'
_exptl_absorpt_correction_T_min   0.948
_exptl_absorpt_correction_T_max   0.992
_exptl_absorpt_process_details    'SADABS-2014/5 (Bruker,2014/5)' 
_exptl_absorpt_special_details    ?
_diffrn_ambient_temperature       120(2)
_diffrn_radiation_wavelength      0.71073
_diffrn_radiation_type            MoK\a
_diffrn_source                    'sealed tube'
_diffrn_measurement_device_type   'Bruker APEX-II CCD' 
_diffrn_measurement_method        '\f and \w scans' 
_diffrn_detector_area_resol_mean  ?
_diffrn_reflns_number             11782
_diffrn_reflns_av_unetI/netI      0.0271
_diffrn_reflns_av_R_equivalents   0.0282
_diffrn_reflns_limit_h_min        -17
_diffrn_reflns_limit_h_max        17
_diffrn_reflns_limit_k_min        -9
_diffrn_reflns_limit_k_max        9
_diffrn_reflns_limit_l_min        -15
_diffrn_reflns_limit_l_max        15
_diffrn_reflns_theta_min          3.222
_diffrn_reflns_theta_max          28.836
_diffrn_reflns_theta_full         25.242
_diffrn_measured_fraction_theta_max   1.000
_diffrn_measured_fraction_theta_full  1.000
_diffrn_reflns_Laue_measured_fraction_max    1.000
_diffrn_reflns_Laue_measured_fraction_full   1.000
_diffrn_reflns_point_group_measured_fraction_max   0.996
_diffrn_reflns_point_group_measured_fraction_full  0.999
_reflns_number_total              2715
_reflns_number_gt                 2548
_reflns_threshold_expression      'I > 2\s(I)'
_reflns_Friedel_coverage          0.901
_reflns_Friedel_fraction_max      0.991
_reflns_Friedel_fraction_full     0.998
 
_reflns_special_details
;
 Reflections were merged by SHELXL according to the crystal
 class for the calculation of statistics and refinement.
 
 _reflns_Friedel_fraction is defined as the number of unique
 Friedel pairs measured divided by the number that would be
 possible theoretically, ignoring centric projections and
 systematic absences.
;
 
_computing_data_collection        'APEX (Bruker, 2014)' 
_computing_cell_refinement        'SAINT (Bruker, 2014)' 
_computing_data_reduction         'SAINT (Bruker, 2014)'
_computing_structure_solution   'SHELXL-2014/6 (Sheldrick, 2014)'
_computing_structure_refinement 'SHELXL-2014/6 (Sheldrick, 2014)'
_computing_molecular_graphics   'SHELXL-2014/6 (Sheldrick, 2014)'
_computing_publication_material   
'SHELXL-2014/6 (Sheldrick, 2014) and PLATON (Spek, 2009)'
_refine_special_details           ?
_refine_ls_structure_factor_coef  Fsqd
_refine_ls_matrix_type            full
_refine_ls_weighting_scheme       calc
_refine_ls_weighting_details
'w=1/[\s^2^(Fo^2^)+(0.0314P)^2^] where P=(Fo^2^+2Fc^2^)/3'
_atom_sites_solution_primary      direct
_atom_sites_solution_secondary    difmap
_atom_sites_solution_hydrogens    difmap
_refine_ls_hydrogen_treatment     refall
_refine_ls_extinction_method      none
_refine_ls_extinction_coef        .
_refine_ls_abs_structure_details
;
 Flack x determined using 1158 quotients [(I+)-(I-)]/[(I+)+(I-)]
 (Parsons, Flack and Wagner, Acta Cryst. B69 (2013) 249-259).
;
_refine_ls_abs_structure_Flack    0.01(2)
_chemical_absolute_configuration  ?
_refine_ls_number_reflns          2715
_refine_ls_number_parameters      167
_refine_ls_number_restraints      1
_refine_ls_R_factor_all           0.0240
_refine_ls_R_factor_gt            0.0220
_refine_ls_wR_factor_ref          0.0562
_refine_ls_wR_factor_gt           0.0558
_refine_ls_goodness_of_fit_ref    1.103
_refine_ls_restrained_S_all       1.103
_refine_ls_shift/su_max           0.000
_refine_ls_shift/su_mean          0.000
 
loop_
 _atom_site_label
 _atom_site_type_symbol
 _atom_site_fract_x
 _atom_site_fract_y
 _atom_site_fract_z
 _atom_site_U_iso_or_equiv
 _atom_site_adp_type
 _atom_site_occupancy
 _atom_site_site_symmetry_order  
 _atom_site_calc_flag
 _atom_site_refinement_flags_posn
 _atom_site_refinement_flags_adp
 _atom_site_refinement_flags_occupancy
 _atom_site_disorder_assembly
 _atom_site_disorder_group
Cl1 Cl 0.05288(4) 0.70566(7) 0.74693(4) 0.02542(13) Uani 1 1 d . . . . .
Cl2 Cl 0.07873(4) 0.21404(7) 0.68029(4) 0.02444(12) Uani 1 1 d . . . . .
C1 C 0.26974(16) 0.7008(2) 0.44888(19) 0.0189(4) Uani 1 1 d . . . . .
C2 C 0.28063(16) 0.4806(3) 0.41897(18) 0.0214(4) Uani 1 1 d . . . . .
B3 B 0.34447(18) 0.5640(3) 0.5402(2) 0.0219(5) Uani 1 1 d . . . . .
B4 B 0.25756(18) 0.7375(3) 0.59453(19) 0.0187(4) Uani 1 1 d . . . . .
B5 B 0.14748(19) 0.7547(3) 0.4966(2) 0.0168(4) Uani 1 1 d . . . . .
B6 B 0.16506(18) 0.5921(3) 0.38202(19) 0.0193(5) Uani 1 1 d . . . . .
B7 B 0.27641(18) 0.3477(3) 0.5410(2) 0.0214(5) Uani 1 1 d . . . . .
B8 B 0.25819(17) 0.5109(3) 0.65621(18) 0.0190(4) Uani 1 1 d . . . . .
B9 B 0.13592(17) 0.6283(3) 0.62917(19) 0.0169(4) Uani 1 1 d . . . . .
B10 B 0.07871(17) 0.5385(3) 0.49818(19) 0.0169(4) Uani 1 1 d . . . . .
B11 B 0.16586(18) 0.3651(3) 0.4439(2) 0.0192(4) Uani 1 1 d . . . . .
B12 B 0.14779(17) 0.3875(3) 0.59700(19) 0.0175(4) Uani 1 1 d . . . . .
H1 H 0.3099(19) 0.786(3) 0.399(3) 0.028(7) Uiso 1 1 d . . . . .
H2 H 0.3295(18) 0.449(3) 0.356(2) 0.034(7) Uiso 1 1 d . . . . .
H3 H 0.4286(19) 0.580(4) 0.542(2) 0.041(7) Uiso 1 1 d . . . . .
H4 H 0.2927(17) 0.860(3) 0.6311(19) 0.019(5) Uiso 1 1 d . . . . .
H5 H 0.1163(18) 0.888(3) 0.4808(19) 0.026(6) Uiso 1 1 d . . . . .
H6 H 0.1487(18) 0.628(3) 0.287(2) 0.027(6) Uiso 1 1 d . . . . .
H7 H 0.3229(18) 0.222(3) 0.542(2) 0.025(6) Uiso 1 1 d . . . . .
H8 H 0.2852(15) 0.491(3) 0.742(2) 0.024(6) Uiso 1 1 d . . . . .
H10 H -0.009(2) 0.531(3) 0.4881(19) 0.034(7) Uiso 1 1 d . . . . .
H11 H 0.143(2) 0.259(3) 0.392(3) 0.033(7) Uiso 1 1 d . . . . .
 
loop_
 _atom_site_aniso_label
 _atom_site_aniso_U_11
 _atom_site_aniso_U_22
 _atom_site_aniso_U_33
 _atom_site_aniso_U_23
 _atom_site_aniso_U_13
 _atom_site_aniso_U_12
Cl1 0.0290(2) 0.0274(3) 0.0199(2) -0.0071(2) 0.0096(2) -0.0085(2)
Cl2 0.0295(3) 0.0200(2) 0.0238(3) 0.0060(2) -0.0033(2) -0.00954(18)
C1 0.0206(9) 0.0181(9) 0.0181(10) 0.0003(8) 0.0051(8) 0.0014(7)
C2 0.0235(10) 0.0209(10) 0.0199(9) -0.0004(7) 0.0053(8) 0.0054(8)
B3 0.0193(11) 0.0229(11) 0.0234(11) 0.0030(9) -0.0012(9) 0.0009(9)
B4 0.0207(10) 0.0185(10) 0.0169(10) 0.0008(8) 0.0006(8) -0.0052(8)
B5 0.0184(10) 0.0149(10) 0.0171(10) 0.0014(8) 0.0036(9) 0.0004(8)
B6 0.0242(11) 0.0177(10) 0.0159(11) 0.0013(8) 0.0014(8) 0.0029(9)
B7 0.0223(11) 0.0192(10) 0.0227(11) 0.0023(9) -0.0031(9) 0.0025(8)
B8 0.0198(10) 0.0197(10) 0.0175(11) 0.0024(8) -0.0035(8) -0.0040(8)
B9 0.0181(10) 0.0181(10) 0.0144(9) -0.0013(7) 0.0026(8) -0.0038(8)
B10 0.0187(10) 0.0164(10) 0.0157(10) -0.0003(8) -0.0012(8) 0.0001(8)
B11 0.0250(11) 0.0156(10) 0.0169(10) -0.0023(8) -0.0027(9) 0.0020(9)
B12 0.0206(10) 0.0149(10) 0.0171(10) 0.0013(8) -0.0024(8) -0.0027(8)
 
_geom_special_details
;
 All esds (except the esd in the dihedral angle between two l.s. planes)
 are estimated using the full covariance matrix.  The cell esds are taken
 into account individually in the estimation of esds in distances, angles
 and torsion angles; correlations between esds in cell parameters are only
 used when they are defined by crystal symmetry.  An approximate (isotropic)
 treatment of cell esds is used for estimating esds involving l.s. planes.
;
 
loop_
 _geom_bond_atom_site_label_1
 _geom_bond_atom_site_label_2
 _geom_bond_distance
 _geom_bond_site_symmetry_2
 _geom_bond_publ_flag
Cl1 B9 1.798(2) . ?
Cl2 B12 1.798(2) . ?
C1 C2 1.626(3) . ?
C1 B5 1.685(3) . ?
C1 B4 1.697(3) . ?
C1 B6 1.718(3) . ?
C1 B3 1.719(3) . ?
C1 H1 0.98(3) . ?
C2 B7 1.695(3) . ?
C2 B11 1.697(3) . ?
C2 B3 1.715(3) . ?
C2 B6 1.720(3) . ?
C2 H2 0.98(2) . ?
B3 B8 1.762(3) . ?
B3 B4 1.776(3) . ?
B3 B7 1.779(3) . ?
B3 H3 1.07(2) . ?
B4 B9 1.772(3) . ?
B4 B8 1.777(3) . ?
B4 B5 1.792(3) . ?
B4 H4 1.07(2) . ?
B5 B6 1.773(3) . ?
B5 B9 1.776(3) . ?
B5 B10 1.782(3) . ?
B5 H5 1.05(2) . ?
B6 B10 1.764(3) . ?
B6 B11 1.780(3) . ?
B6 H6 1.14(2) . ?
B7 B12 1.772(3) . ?
B7 B8 1.781(3) . ?
B7 B11 1.791(3) . ?
B7 H7 1.08(2) . ?
B8 B12 1.788(3) . ?
B8 B9 1.789(3) . ?
B8 H8 1.05(2) . ?
B9 B12 1.778(3) . ?
B9 B10 1.787(3) . ?
B10 B11 1.777(3) . ?
B10 B12 1.796(3) . ?
B10 H10 1.12(3) . ?
B11 B12 1.776(3) . ?
B11 H11 1.01(3) . ?
 
loop_
 _geom_angle_atom_site_label_1
 _geom_angle_atom_site_label_2
 _geom_angle_atom_site_label_3
 _geom_angle
 _geom_angle_site_symmetry_1
 _geom_angle_site_symmetry_3
 _geom_angle_publ_flag
C2 C1 B5 111.74(16) . . ?
C2 C1 B4 111.52(15) . . ?
B5 C1 B4 63.99(13) . . ?
C2 C1 B6 61.84(12) . . ?
B5 C1 B6 62.78(13) . . ?
B4 C1 B6 116.09(16) . . ?
C2 C1 B3 61.60(13) . . ?
B5 C1 B3 116.01(16) . . ?
B4 C1 B3 62.65(14) . . ?
B6 C1 B3 115.77(15) . . ?
C2 C1 H1 116.3(15) . . ?
B5 C1 H1 121.5(13) . . ?
B4 C1 H1 121.4(16) . . ?
B6 C1 H1 115.3(16) . . ?
B3 C1 H1 115.2(14) . . ?
C1 C2 B7 111.88(16) . . ?
C1 C2 B11 111.65(16) . . ?
B7 C2 B11 63.75(13) . . ?
C1 C2 B3 61.86(13) . . ?
B7 C2 B3 62.87(13) . . ?
B11 C2 B3 115.95(16) . . ?
C1 C2 B6 61.70(13) . . ?
B7 C2 B6 116.06(15) . . ?
B11 C2 B6 62.81(12) . . ?
B3 C2 B6 115.86(16) . . ?
C1 C2 H2 116.0(15) . . ?
B7 C2 H2 119.8(15) . . ?
B11 C2 H2 123.3(14) . . ?
B3 C2 H2 112.5(14) . . ?
B6 C2 H2 117.7(14) . . ?
C2 B3 C1 56.54(12) . . ?
C2 B3 B8 104.11(15) . . ?
C1 B3 B8 104.07(15) . . ?
C2 B3 B4 103.82(15) . . ?
C1 B3 B4 58.07(12) . . ?
B8 B3 B4 60.30(13) . . ?
C2 B3 B7 58.03(13) . . ?
C1 B3 B7 103.78(16) . . ?
B8 B3 B7 60.40(13) . . ?
B4 B3 B7 108.27(16) . . ?
C2 B3 H3 121.2(14) . . ?
C1 B3 H3 119.6(14) . . ?
B8 B3 H3 128.9(14) . . ?
B4 B3 H3 122.3(15) . . ?
B7 B3 H3 125.1(14) . . ?
C1 B4 B9 103.30(16) . . ?
C1 B4 B3 59.28(12) . . ?
B9 B4 B3 107.70(15) . . ?
C1 B4 B8 104.34(15) . . ?
B9 B4 B8 60.53(12) . . ?
B3 B4 B8 59.46(13) . . ?
C1 B4 B5 57.69(13) . . ?
B9 B4 B5 59.77(12) . . ?
B3 B4 B5 108.03(16) . . ?
B8 B4 B5 108.40(15) . . ?
C1 B4 H4 118.4(12) . . ?
B9 B4 H4 129.5(12) . . ?
B3 B4 H4 117.3(12) . . ?
B8 B4 H4 126.6(12) . . ?
B5 B4 H4 120.7(12) . . ?
C1 B5 B6 59.50(12) . . ?
C1 B5 B9 103.61(16) . . ?
B6 B5 B9 107.83(15) . . ?
C1 B5 B10 104.48(15) . . ?
B6 B5 B10 59.52(12) . . ?
B9 B5 B10 60.30(12) . . ?
C1 B5 B4 58.32(13) . . ?
B6 B5 B4 108.72(16) . . ?
B9 B5 B4 59.56(12) . . ?
B10 B5 B4 108.22(16) . . ?
C1 B5 H5 119.8(12) . . ?
B6 B5 H5 121.4(12) . . ?
B9 B5 H5 125.6(12) . . ?
B10 B5 H5 127.9(13) . . ?
B4 B5 H5 117.5(13) . . ?
C1 B6 C2 56.46(12) . . ?
C1 B6 B10 103.88(15) . . ?
C2 B6 B10 103.78(15) . . ?
C1 B6 B5 57.72(12) . . ?
C2 B6 B5 103.40(16) . . ?
B10 B6 B5 60.50(12) . . ?
C1 B6 B11 103.60(15) . . ?
C2 B6 B11 57.95(12) . . ?
B10 B6 B11 60.16(12) . . ?
B5 B6 B11 108.09(15) . . ?
C1 B6 H6 117.6(12) . . ?
C2 B6 H6 119.6(12) . . ?
B10 B6 H6 131.3(12) . . ?
B5 B6 H6 122.6(11) . . ?
B11 B6 H6 126.1(11) . . ?
C2 B7 B12 103.67(15) . . ?
C2 B7 B3 59.10(13) . . ?
B12 B7 B3 107.75(16) . . ?
C2 B7 B8 104.10(16) . . ?
B12 B7 B8 60.44(12) . . ?
B3 B7 B8 59.34(13) . . ?
C2 B7 B11 58.16(13) . . ?
B12 B7 B11 59.80(12) . . ?
B3 B7 B11 108.23(16) . . ?
B8 B7 B11 108.25(16) . . ?
C2 B7 H7 117.6(15) . . ?
B12 B7 H7 129.3(13) . . ?
B3 B7 H7 118.0(12) . . ?
B8 B7 H7 128.0(15) . . ?
B11 B7 H7 119.4(14) . . ?
B3 B8 B4 60.23(13) . . ?
B3 B8 B7 60.25(13) . . ?
B4 B8 B7 108.10(15) . . ?
B3 B8 B12 107.74(16) . . ?
B4 B8 B12 107.52(15) . . ?
B7 B8 B12 59.51(12) . . ?
B3 B8 B9 107.57(15) . . ?
B4 B8 B9 59.60(12) . . ?
B7 B8 B9 107.14(14) . . ?
B12 B8 B9 59.60(12) . . ?
B3 B8 H8 122.3(11) . . ?
B4 B8 H8 120.1(12) . . ?
B7 B8 H8 124.0(12) . . ?
B12 B8 H8 122.7(12) . . ?
B9 B8 H8 120.6(11) . . ?
B4 B9 B5 60.67(13) . . ?
B4 B9 B12 108.20(15) . . ?
B5 B9 B12 108.33(15) . . ?
B4 B9 B10 108.87(15) . . ?
B5 B9 B10 60.01(12) . . ?
B12 B9 B10 60.50(12) . . ?
B4 B9 B8 59.87(12) . . ?
B5 B9 B8 108.59(15) . . ?
B12 B9 B8 60.18(12) . . ?
B10 B9 B8 108.94(15) . . ?
B4 B9 Cl1 122.53(14) . . ?
B5 B9 Cl1 122.10(15) . . ?
B12 B9 Cl1 120.44(14) . . ?
B10 B9 Cl1 120.38(14) . . ?
B8 B9 Cl1 121.40(14) . . ?
B6 B10 B11 60.37(12) . . ?
B6 B10 B5 59.98(12) . . ?
B11 B10 B5 107.85(15) . . ?
B6 B10 B9 107.71(15) . . ?
B11 B10 B9 107.25(15) . . ?
B5 B10 B9 59.69(12) . . ?
B6 B10 B12 107.87(15) . . ?
B11 B10 B12 59.62(12) . . ?
B5 B10 B12 107.27(16) . . ?
B9 B10 B12 59.49(12) . . ?
B6 B10 H10 123.2(12) . . ?
B11 B10 H10 123.0(12) . . ?
B5 B10 H10 121.8(12) . . ?
B9 B10 H10 120.5(12) . . ?
B12 B10 H10 121.2(12) . . ?
C2 B11 B12 103.43(16) . . ?
C2 B11 B10 104.23(15) . . ?
B12 B11 B10 60.73(13) . . ?
C2 B11 B6 59.24(12) . . ?
B12 B11 B6 108.05(15) . . ?
B10 B11 B6 59.47(12) . . ?
C2 B11 B7 58.09(13) . . ?
B12 B11 B7 59.55(13) . . ?
B10 B11 B7 108.42(16) . . ?
B6 B11 B7 108.44(16) . . ?
C2 B11 H11 120.8(16) . . ?
B12 B11 H11 128.0(16) . . ?
B10 B11 H11 124.2(16) . . ?
B6 B11 H11 117.1(16) . . ?
B7 B11 H11 122.3(15) . . ?
B7 B12 B11 60.65(12) . . ?
B7 B12 B9 108.06(15) . . ?
B11 B12 B9 107.69(15) . . ?
B7 B12 B8 60.05(13) . . ?
B11 B12 B8 108.62(15) . . ?
B9 B12 B8 60.22(12) . . ?
B7 B12 B10 108.43(15) . . ?
B11 B12 B10 59.65(12) . . ?
B9 B12 B10 60.01(12) . . ?
B8 B12 B10 108.58(15) . . ?
B7 B12 Cl2 121.74(14) . . ?
B11 B12 Cl2 121.60(14) . . ?
B9 B12 Cl2 121.70(14) . . ?
B8 B12 Cl2 121.50(14) . . ?
B10 B12 Cl2 121.23(14) . . ?
 
loop_
 _geom_torsion_atom_site_label_1
 _geom_torsion_atom_site_label_2
 _geom_torsion_atom_site_label_3
 _geom_torsion_atom_site_label_4
 _geom_torsion
 _geom_torsion_site_symmetry_1
 _geom_torsion_site_symmetry_2
 _geom_torsion_site_symmetry_3
 _geom_torsion_site_symmetry_4
 _geom_torsion_publ_flag
B5 C1 C2 B7 -69.3(2) . . . . ?
B4 C1 C2 B7 0.2(2) . . . . ?
B6 C1 C2 B7 -108.75(17) . . . . ?
B3 C1 C2 B7 39.45(16) . . . . ?
B5 C1 C2 B11 0.0(2) . . . . ?
B4 C1 C2 B11 69.5(2) . . . . ?
B6 C1 C2 B11 -39.45(15) . . . . ?
B3 C1 C2 B11 108.75(18) . . . . ?
B5 C1 C2 B3 -108.73(18) . . . . ?
B4 C1 C2 B3 -39.24(17) . . . . ?
B6 C1 C2 B3 -148.20(16) . . . . ?
B5 C1 C2 B6 39.47(16) . . . . ?
B4 C1 C2 B6 108.97(18) . . . . ?
B3 C1 C2 B6 148.20(16) . . . . ?
B7 C2 B3 C1 -138.51(16) . . . . ?
B11 C2 B3 C1 -101.83(18) . . . . ?
B6 C2 B3 C1 -31.03(16) . . . . ?
C1 C2 B3 B8 97.72(16) . . . . ?
B7 C2 B3 B8 -40.79(15) . . . . ?
B11 C2 B3 B8 -4.1(2) . . . . ?
B6 C2 B3 B8 66.7(2) . . . . ?
C1 C2 B3 B4 35.38(14) . . . . ?
B7 C2 B3 B4 -103.13(17) . . . . ?
B11 C2 B3 B4 -66.5(2) . . . . ?
B6 C2 B3 B4 4.3(2) . . . . ?
C1 C2 B3 B7 138.51(16) . . . . ?
B11 C2 B3 B7 36.68(16) . . . . ?
B6 C2 B3 B7 107.47(18) . . . . ?
B5 C1 B3 C2 101.81(18) . . . . ?
B4 C1 B3 C2 138.51(17) . . . . ?
B6 C1 B3 C2 31.05(15) . . . . ?
C2 C1 B3 B8 -97.80(16) . . . . ?
B5 C1 B3 B8 4.0(2) . . . . ?
B4 C1 B3 B8 40.72(15) . . . . ?
B6 C1 B3 B8 -66.7(2) . . . . ?
C2 C1 B3 B4 -138.51(17) . . . . ?
B5 C1 B3 B4 -36.71(16) . . . . ?
B6 C1 B3 B4 -107.46(18) . . . . ?
C2 C1 B3 B7 -35.36(15) . . . . ?
B5 C1 B3 B7 66.4(2) . . . . ?
B4 C1 B3 B7 103.15(17) . . . . ?
B6 C1 B3 B7 -4.3(2) . . . . ?
C2 C1 B4 B9 -64.1(2) . . . . ?
B5 C1 B4 B9 40.41(14) . . . . ?
B6 C1 B4 B9 4.1(2) . . . . ?
B3 C1 B4 B9 -102.89(16) . . . . ?
C2 C1 B4 B3 38.79(16) . . . . ?
B5 C1 B4 B3 143.29(16) . . . . ?
B6 C1 B4 B3 106.96(17) . . . . ?
C2 C1 B4 B8 -1.6(2) . . . . ?
B5 C1 B4 B8 102.93(16) . . . . ?
B6 C1 B4 B8 66.6(2) . . . . ?
B3 C1 B4 B8 -40.36(15) . . . . ?
C2 C1 B4 B5 -104.51(18) . . . . ?
B6 C1 B4 B5 -36.33(16) . . . . ?
B3 C1 B4 B5 -143.29(16) . . . . ?
C2 B3 B4 C1 -34.69(14) . . . . ?
B8 B3 B4 C1 -133.24(17) . . . . ?
B7 B3 B4 C1 -95.15(17) . . . . ?
C2 B3 B4 B9 60.54(19) . . . . ?
C1 B3 B4 B9 95.23(17) . . . . ?
B8 B3 B4 B9 -38.01(15) . . . . ?
B7 B3 B4 B9 0.1(2) . . . . ?
C2 B3 B4 B8 98.55(16) . . . . ?
C1 B3 B4 B8 133.24(17) . . . . ?
B7 B3 B4 B8 38.09(15) . . . . ?
C2 B3 B4 B5 -2.6(2) . . . . ?
C1 B3 B4 B5 32.09(15) . . . . ?
B8 B3 B4 B5 -101.15(17) . . . . ?
B7 B3 B4 B5 -63.1(2) . . . . ?
C2 C1 B5 B6 -39.07(16) . . . . ?
B4 C1 B5 B6 -143.25(15) . . . . ?
B3 C1 B5 B6 -107.04(17) . . . . ?
C2 C1 B5 B9 63.8(2) . . . . ?
B4 C1 B5 B9 -40.36(14) . . . . ?
B6 C1 B5 B9 102.88(15) . . . . ?
B3 C1 B5 B9 -4.2(2) . . . . ?
C2 C1 B5 B10 1.5(2) . . . . ?
B4 C1 B5 B10 -102.72(16) . . . . ?
B6 C1 B5 B10 40.53(14) . . . . ?
B3 C1 B5 B10 -66.5(2) . . . . ?
C2 C1 B5 B4 104.18(18) . . . . ?
B6 C1 B5 B4 143.25(15) . . . . ?
B3 C1 B5 B4 36.21(17) . . . . ?
B9 B4 B5 C1 -133.11(16) . . . . ?
B3 B4 B5 C1 -32.71(15) . . . . ?
B8 B4 B5 C1 -95.65(16) . . . . ?
C1 B4 B5 B6 32.98(14) . . . . ?
B9 B4 B5 B6 -100.12(16) . . . . ?
B3 B4 B5 B6 0.3(2) . . . . ?
B8 B4 B5 B6 -62.67(19) . . . . ?
C1 B4 B5 B9 133.11(16) . . . . ?
B3 B4 B5 B9 100.40(16) . . . . ?
B8 B4 B5 B9 37.45(14) . . . . ?
C1 B4 B5 B10 96.09(16) . . . . ?
B9 B4 B5 B10 -37.02(14) . . . . ?
B3 B4 B5 B10 63.4(2) . . . . ?
B8 B4 B5 B10 0.4(2) . . . . ?
B5 C1 B6 C2 -138.39(16) . . . . ?
B4 C1 B6 C2 -101.61(17) . . . . ?
B3 C1 B6 C2 -30.98(16) . . . . ?
C2 C1 B6 B10 97.50(16) . . . . ?
B5 C1 B6 B10 -40.89(14) . . . . ?
B4 C1 B6 B10 -4.1(2) . . . . ?
B3 C1 B6 B10 66.53(19) . . . . ?
C2 C1 B6 B5 138.39(16) . . . . ?
B4 C1 B6 B5 36.78(16) . . . . ?
B3 C1 B6 B5 107.42(18) . . . . ?
C2 C1 B6 B11 35.38(14) . . . . ?
B5 C1 B6 B11 -103.01(16) . . . . ?
B4 C1 B6 B11 -66.23(19) . . . . ?
B3 C1 B6 B11 4.4(2) . . . . ?
B7 C2 B6 C1 102.00(18) . . . . ?
B11 C2 B6 C1 138.40(16) . . . . ?
B3 C2 B6 C1 31.08(16) . . . . ?
C1 C2 B6 B10 -97.69(16) . . . . ?
B7 C2 B6 B10 4.3(2) . . . . ?
B11 C2 B6 B10 40.71(14) . . . . ?
B3 C2 B6 B10 -66.60(19) . . . . ?
C1 C2 B6 B5 -35.25(14) . . . . ?
B7 C2 B6 B5 66.7(2) . . . . ?
B11 C2 B6 B5 103.15(16) . . . . ?
B3 C2 B6 B5 -4.2(2) . . . . ?
C1 C2 B6 B11 -138.40(16) . . . . ?
B7 C2 B6 B11 -36.40(16) . . . . ?
B3 C2 B6 B11 -107.31(18) . . . . ?
B9 B5 B6 C1 -95.59(17) . . . . ?
B10 B5 B6 C1 -133.11(16) . . . . ?
B4 B5 B6 C1 -32.52(14) . . . . ?
C1 B5 B6 C2 34.68(14) . . . . ?
B9 B5 B6 C2 -60.91(18) . . . . ?
B10 B5 B6 C2 -98.43(16) . . . . ?
B4 B5 B6 C2 2.16(19) . . . . ?
C1 B5 B6 B10 133.11(16) . . . . ?
B9 B5 B6 B10 37.52(14) . . . . ?
B4 B5 B6 B10 100.58(17) . . . . ?
C1 B5 B6 B11 94.95(17) . . . . ?
B9 B5 B6 B11 -0.6(2) . . . . ?
B10 B5 B6 B11 -38.16(15) . . . . ?
B4 B5 B6 B11 62.4(2) . . . . ?
C1 C2 B7 B12 63.7(2) . . . . ?
B11 C2 B7 B12 -40.49(14) . . . . ?
B3 C2 B7 B12 102.72(17) . . . . ?
B6 C2 B7 B12 -4.4(2) . . . . ?
C1 C2 B7 B3 -39.02(16) . . . . ?
B11 C2 B7 B3 -143.21(17) . . . . ?
B6 C2 B7 B3 -107.16(18) . . . . ?
C1 C2 B7 B8 1.2(2) . . . . ?
B11 C2 B7 B8 -102.95(16) . . . . ?
B3 C2 B7 B8 40.26(14) . . . . ?
B6 C2 B7 B8 -66.9(2) . . . . ?
C1 C2 B7 B11 104.19(18) . . . . ?
B3 C2 B7 B11 143.21(17) . . . . ?
B6 C2 B7 B11 36.05(16) . . . . ?
C1 B3 B7 C2 34.69(14) . . . . ?
B8 B3 B7 C2 133.23(16) . . . . ?
B4 B3 B7 C2 95.18(17) . . . . ?
C2 B3 B7 B12 -95.60(16) . . . . ?
C1 B3 B7 B12 -60.91(19) . . . . ?
B8 B3 B7 B12 37.63(15) . . . . ?
B4 B3 B7 B12 -0.4(2) . . . . ?
C2 B3 B7 B8 -133.23(16) . . . . ?
C1 B3 B7 B8 -98.54(16) . . . . ?
B4 B3 B7 B8 -38.04(15) . . . . ?
C2 B3 B7 B11 -32.39(15) . . . . ?
C1 B3 B7 B11 2.3(2) . . . . ?
B8 B3 B7 B11 100.84(18) . . . . ?
B4 B3 B7 B11 62.8(2) . . . . ?
C2 B3 B8 B4 -98.05(16) . . . . ?
C1 B3 B8 B4 -39.59(14) . . . . ?
B7 B3 B8 B4 -137.65(16) . . . . ?
C2 B3 B8 B7 39.60(14) . . . . ?
C1 B3 B8 B7 98.06(17) . . . . ?
B4 B3 B8 B7 137.65(16) . . . . ?
C2 B3 B8 B12 2.4(2) . . . . ?
C1 B3 B8 B12 60.84(19) . . . . ?
B4 B3 B8 B12 100.43(17) . . . . ?
B7 B3 B8 B12 -37.21(14) . . . . ?
C2 B3 B8 B9 -60.49(19) . . . . ?
C1 B3 B8 B9 -2.0(2) . . . . ?
B4 B3 B8 B9 37.57(15) . . . . ?
B7 B3 B8 B9 -100.08(16) . . . . ?
C1 B4 B8 B3 40.27(15) . . . . ?
B9 B4 B8 B3 137.63(16) . . . . ?
B5 B4 B8 B3 100.51(17) . . . . ?
C1 B4 B8 B7 2.3(2) . . . . ?
B9 B4 B8 B7 99.66(16) . . . . ?
B3 B4 B8 B7 -37.98(16) . . . . ?
B5 B4 B8 B7 62.5(2) . . . . ?
C1 B4 B8 B12 -60.5(2) . . . . ?
B9 B4 B8 B12 36.82(15) . . . . ?
B3 B4 B8 B12 -100.81(17) . . . . ?
B5 B4 B8 B12 -0.3(2) . . . . ?
C1 B4 B8 B9 -97.37(17) . . . . ?
B3 B4 B8 B9 -137.63(16) . . . . ?
B5 B4 B8 B9 -37.12(14) . . . . ?
C2 B7 B8 B3 -40.14(14) . . . . ?
B12 B7 B8 B3 -138.05(16) . . . . ?
B11 B7 B8 B3 -100.80(17) . . . . ?
C2 B7 B8 B4 -2.2(2) . . . . ?
B12 B7 B8 B4 -100.09(16) . . . . ?
B3 B7 B8 B4 37.97(15) . . . . ?
B11 B7 B8 B4 -62.8(2) . . . . ?
C2 B7 B8 B12 97.92(16) . . . . ?
B3 B7 B8 B12 138.05(16) . . . . ?
B11 B7 B8 B12 37.25(15) . . . . ?
C2 B7 B8 B9 60.68(18) . . . . ?
B12 B7 B8 B9 -37.24(14) . . . . ?
B3 B7 B8 B9 100.81(16) . . . . ?
B11 B7 B8 B9 0.0(2) . . . . ?
C1 B4 B9 B5 -39.35(14) . . . . ?
B3 B4 B9 B5 -100.95(17) . . . . ?
B8 B4 B9 B5 -138.49(15) . . . . ?
C1 B4 B9 B12 61.90(18) . . . . ?
B3 B4 B9 B12 0.3(2) . . . . ?
B8 B4 B9 B12 -37.24(15) . . . . ?
B5 B4 B9 B12 101.25(16) . . . . ?
C1 B4 B9 B10 -2.29(19) . . . . ?
B3 B4 B9 B10 -63.9(2) . . . . ?
B8 B4 B9 B10 -101.43(16) . . . . ?
B5 B4 B9 B10 37.06(15) . . . . ?
C1 B4 B9 B8 99.14(16) . . . . ?
B3 B4 B9 B8 37.54(15) . . . . ?
B5 B4 B9 B8 138.49(15) . . . . ?
C1 B4 B9 Cl1 -150.73(15) . . . . ?
B3 B4 B9 Cl1 147.67(15) . . . . ?
B8 B4 B9 Cl1 110.14(17) . . . . ?
B5 B4 B9 Cl1 -111.38(18) . . . . ?
C1 B5 B9 B4 39.73(14) . . . . ?
B6 B5 B9 B4 101.66(17) . . . . ?
B10 B5 B9 B4 138.83(16) . . . . ?
C1 B5 B9 B12 -61.29(18) . . . . ?
B6 B5 B9 B12 0.6(2) . . . . ?
B10 B5 B9 B12 37.80(15) . . . . ?
B4 B5 B9 B12 -101.03(16) . . . . ?
C1 B5 B9 B10 -99.09(16) . . . . ?
B6 B5 B9 B10 -37.17(14) . . . . ?
B4 B5 B9 B10 -138.83(16) . . . . ?
C1 B5 B9 B8 2.52(19) . . . . ?
B6 B5 B9 B8 64.45(19) . . . . ?
B10 B5 B9 B8 101.61(16) . . . . ?
B4 B5 B9 B8 -37.21(14) . . . . ?
C1 B5 B9 Cl1 151.80(14) . . . . ?
B6 B5 B9 Cl1 -146.28(15) . . . . ?
B10 B5 B9 Cl1 -109.11(17) . . . . ?
B4 B5 B9 Cl1 112.07(18) . . . . ?
B3 B8 B9 B4 -37.85(15) . . . . ?
B7 B8 B9 B4 -101.30(17) . . . . ?
B12 B8 B9 B4 -138.50(16) . . . . ?
B3 B8 B9 B5 -0.3(2) . . . . ?
B4 B8 B9 B5 37.56(14) . . . . ?
B7 B8 B9 B5 -63.74(19) . . . . ?
B12 B8 B9 B5 -100.94(16) . . . . ?
B3 B8 B9 B12 100.65(17) . . . . ?
B4 B8 B9 B12 138.50(16) . . . . ?
B7 B8 B9 B12 37.20(14) . . . . ?
B3 B8 B9 B10 63.47(19) . . . . ?
B4 B8 B9 B10 101.32(16) . . . . ?
B7 B8 B9 B10 0.0(2) . . . . ?
B12 B8 B9 B10 -37.18(14) . . . . ?
B3 B8 B9 Cl1 -149.83(15) . . . . ?
B4 B8 B9 Cl1 -111.98(17) . . . . ?
B7 B8 B9 Cl1 146.72(15) . . . . ?
B12 B8 B9 Cl1 109.52(17) . . . . ?
C1 B6 B10 B11 -97.90(16) . . . . ?
C2 B6 B10 B11 -39.60(14) . . . . ?
B5 B6 B10 B11 -137.38(17) . . . . ?
C1 B6 B10 B5 39.48(14) . . . . ?
C2 B6 B10 B5 97.79(16) . . . . ?
B11 B6 B10 B5 137.38(17) . . . . ?
C1 B6 B10 B9 2.26(19) . . . . ?
C2 B6 B10 B9 60.57(18) . . . . ?
B5 B6 B10 B9 -37.22(14) . . . . ?
B11 B6 B10 B9 100.17(16) . . . . ?
C1 B6 B10 B12 -60.54(18) . . . . ?
C2 B6 B10 B12 -2.2(2) . . . . ?
B5 B6 B10 B12 -100.02(17) . . . . ?
B11 B6 B10 B12 37.37(15) . . . . ?
C1 B5 B10 B6 -40.52(14) . . . . ?
B9 B5 B10 B6 -138.13(16) . . . . ?
B4 B5 B10 B6 -101.44(17) . . . . ?
C1 B5 B10 B11 -2.3(2) . . . . ?
B6 B5 B10 B11 38.19(15) . . . . ?
B9 B5 B10 B11 -99.94(16) . . . . ?
B4 B5 B10 B11 -63.24(19) . . . . ?
C1 B5 B10 B9 97.61(16) . . . . ?
B6 B5 B10 B9 138.13(16) . . . . ?
B4 B5 B10 B9 36.70(14) . . . . ?
C1 B5 B10 B12 60.52(19) . . . . ?
B6 B5 B10 B12 101.04(16) . . . . ?
B9 B5 B10 B12 -37.09(14) . . . . ?
B4 B5 B10 B12 -0.4(2) . . . . ?
B4 B9 B10 B6 0.0(2) . . . . ?
B5 B9 B10 B6 37.35(14) . . . . ?
B12 B9 B10 B6 -100.71(16) . . . . ?
B8 B9 B10 B6 -63.67(18) . . . . ?
Cl1 B9 B10 B6 149.23(14) . . . . ?
B4 B9 B10 B11 63.63(19) . . . . ?
B5 B9 B10 B11 100.97(16) . . . . ?
B12 B9 B10 B11 -37.09(14) . . . . ?
B8 B9 B10 B11 -0.04(19) . . . . ?
Cl1 B9 B10 B11 -147.14(15) . . . . ?
B4 B9 B10 B5 -37.34(15) . . . . ?
B12 B9 B10 B5 -138.05(16) . . . . ?
B8 B9 B10 B5 -101.01(16) . . . . ?
Cl1 B9 B10 B5 111.89(18) . . . . ?
B4 B9 B10 B12 100.71(17) . . . . ?
B5 B9 B10 B12 138.05(16) . . . . ?
B8 B9 B10 B12 37.04(15) . . . . ?
Cl1 B9 B10 B12 -110.06(17) . . . . ?
C1 C2 B11 B12 -64.2(2) . . . . ?
B7 C2 B11 B12 40.32(14) . . . . ?
B3 C2 B11 B12 4.0(2) . . . . ?
B6 C2 B11 B12 -103.21(16) . . . . ?
C1 C2 B11 B10 -1.5(2) . . . . ?
B7 C2 B11 B10 103.06(17) . . . . ?
B3 C2 B11 B10 66.7(2) . . . . ?
B6 C2 B11 B10 -40.47(15) . . . . ?
C1 C2 B11 B6 38.97(16) . . . . ?
B7 C2 B11 B6 143.53(16) . . . . ?
B3 C2 B11 B6 107.18(18) . . . . ?
C1 C2 B11 B7 -104.56(18) . . . . ?
B3 C2 B11 B7 -36.35(17) . . . . ?
B6 C2 B11 B7 -143.53(16) . . . . ?
B6 B10 B11 C2 40.35(14) . . . . ?
B5 B10 B11 C2 2.3(2) . . . . ?
B9 B10 B11 C2 -60.59(18) . . . . ?
B12 B10 B11 C2 -97.62(16) . . . . ?
B6 B10 B11 B12 137.97(17) . . . . ?
B5 B10 B11 B12 99.95(17) . . . . ?
B9 B10 B11 B12 37.03(14) . . . . ?
B5 B10 B11 B6 -38.02(15) . . . . ?
B9 B10 B11 B6 -100.94(16) . . . . ?
B12 B10 B11 B6 -137.97(17) . . . . ?
B6 B10 B11 B7 100.99(17) . . . . ?
B5 B10 B11 B7 63.0(2) . . . . ?
B9 B10 B11 B7 0.1(2) . . . . ?
B12 B10 B11 B7 -36.97(15) . . . . ?
C1 B6 B11 C2 -34.71(14) . . . . ?
B10 B6 B11 C2 -133.09(17) . . . . ?
B5 B6 B11 C2 -94.77(17) . . . . ?
C1 B6 B11 B12 60.48(18) . . . . ?
C2 B6 B11 B12 95.18(17) . . . . ?
B10 B6 B11 B12 -37.90(15) . . . . ?
B5 B6 B11 B12 0.4(2) . . . . ?
C1 B6 B11 B10 98.38(16) . . . . ?
C2 B6 B11 B10 133.09(17) . . . . ?
B5 B6 B11 B10 38.32(15) . . . . ?
C1 B6 B11 B7 -2.6(2) . . . . ?
C2 B6 B11 B7 32.13(15) . . . . ?
B10 B6 B11 B7 -100.95(18) . . . . ?
B5 B6 B11 B7 -62.6(2) . . . . ?
B12 B7 B11 C2 133.11(16) . . . . ?
B3 B7 B11 C2 32.75(15) . . . . ?
B8 B7 B11 C2 95.58(17) . . . . ?
C2 B7 B11 B12 -133.11(16) . . . . ?
B3 B7 B11 B12 -100.36(17) . . . . ?
B8 B7 B11 B12 -37.53(15) . . . . ?
C2 B7 B11 B10 -95.62(16) . . . . ?
B12 B7 B11 B10 37.49(15) . . . . ?
B3 B7 B11 B10 -62.9(2) . . . . ?
B8 B7 B11 B10 0.0(2) . . . . ?
C2 B7 B11 B6 -32.58(15) . . . . ?
B12 B7 B11 B6 100.53(17) . . . . ?
B3 B7 B11 B6 0.2(2) . . . . ?
B8 B7 B11 B6 63.0(2) . . . . ?
C2 B7 B12 B11 39.66(14) . . . . ?
B3 B7 B12 B11 101.17(17) . . . . ?
B8 B7 B12 B11 138.31(16) . . . . ?
C2 B7 B12 B9 -60.90(19) . . . . ?
B3 B7 B12 B9 0.6(2) . . . . ?
B8 B7 B12 B9 37.74(14) . . . . ?
B11 B7 B12 B9 -100.57(16) . . . . ?
C2 B7 B12 B8 -98.64(17) . . . . ?
B3 B7 B12 B8 -37.14(15) . . . . ?
B11 B7 B12 B8 -138.31(16) . . . . ?
C2 B7 B12 B10 2.6(2) . . . . ?
B3 B7 B12 B10 64.15(19) . . . . ?
B8 B7 B12 B10 101.29(16) . . . . ?
B11 B7 B12 B10 -37.02(15) . . . . ?
C2 B7 B12 Cl2 150.71(14) . . . . ?
B3 B7 B12 Cl2 -147.79(15) . . . . ?
B8 B7 B12 Cl2 -110.65(18) . . . . ?
B11 B7 B12 Cl2 111.04(18) . . . . ?
C2 B11 B12 B7 -39.58(14) . . . . ?
B10 B11 B12 B7 -138.55(16) . . . . ?
B6 B11 B12 B7 -101.21(17) . . . . ?
C2 B11 B12 B9 61.60(18) . . . . ?
B10 B11 B12 B9 -37.37(14) . . . . ?
B6 B11 B12 B9 0.0(2) . . . . ?
B7 B11 B12 B9 101.19(17) . . . . ?
C2 B11 B12 B8 -2.13(19) . . . . ?
B10 B11 B12 B8 -101.10(16) . . . . ?
B6 B11 B12 B8 -63.75(19) . . . . ?
B7 B11 B12 B8 37.45(15) . . . . ?
C2 B11 B12 B10 98.97(16) . . . . ?
B6 B11 B12 B10 37.34(15) . . . . ?
B7 B11 B12 B10 138.55(16) . . . . ?
C2 B11 B12 Cl2 -150.84(14) . . . . ?
B10 B11 B12 Cl2 110.19(18) . . . . ?
B6 B11 B12 Cl2 147.54(15) . . . . ?
B7 B11 B12 Cl2 -111.26(18) . . . . ?
B4 B9 B12 B7 -0.6(2) . . . . ?
B5 B9 B12 B7 63.70(19) . . . . ?
B10 B9 B12 B7 101.28(16) . . . . ?
B8 B9 B12 B7 -37.66(14) . . . . ?
Cl1 B9 B12 B7 -148.74(15) . . . . ?
B4 B9 B12 B11 -64.64(19) . . . . ?
B5 B9 B12 B11 -0.4(2) . . . . ?
B10 B9 B12 B11 37.21(14) . . . . ?
B8 B9 B12 B11 -101.74(16) . . . . ?
Cl1 B9 B12 B11 147.18(15) . . . . ?
B4 B9 B12 B8 37.11(14) . . . . ?
B5 B9 B12 B8 101.36(16) . . . . ?
B10 B9 B12 B8 138.95(15) . . . . ?
Cl1 B9 B12 B8 -111.08(17) . . . . ?
B4 B9 B12 B10 -101.84(16) . . . . ?
B5 B9 B12 B10 -37.58(15) . . . . ?
B8 B9 B12 B10 -138.95(15) . . . . ?
Cl1 B9 B12 B10 109.97(17) . . . . ?
B4 B9 B12 Cl2 147.85(15) . . . . ?
B5 B9 B12 Cl2 -147.90(15) . . . . ?
B10 B9 B12 Cl2 -110.31(17) . . . . ?
B8 B9 B12 Cl2 110.74(17) . . . . ?
Cl1 B9 B12 Cl2 -0.3(2) . . . . ?
B3 B8 B12 B7 37.54(15) . . . . ?
B4 B8 B12 B7 101.08(16) . . . . ?
B9 B8 B12 B7 137.90(15) . . . . ?
B3 B8 B12 B11 -0.2(2) . . . . ?
B4 B8 B12 B11 63.36(19) . . . . ?
B7 B8 B12 B11 -37.72(15) . . . . ?
B9 B8 B12 B11 100.18(16) . . . . ?
B3 B8 B12 B9 -100.36(17) . . . . ?
B4 B8 B12 B9 -36.82(15) . . . . ?
B7 B8 B12 B9 -137.90(15) . . . . ?
B3 B8 B12 B10 -63.48(19) . . . . ?
B4 B8 B12 B10 0.1(2) . . . . ?
B7 B8 B12 B10 -101.02(16) . . . . ?
B9 B8 B12 B10 36.88(14) . . . . ?
B3 B8 B12 Cl2 148.58(15) . . . . ?
B4 B8 B12 Cl2 -147.89(15) . . . . ?
B7 B8 B12 Cl2 111.03(17) . . . . ?
B9 B8 B12 Cl2 -111.07(17) . . . . ?
B6 B10 B12 B7 -0.2(2) . . . . ?
B11 B10 B12 B7 37.46(15) . . . . ?
B5 B10 B12 B7 -63.49(19) . . . . ?
B9 B10 B12 B7 -100.66(17) . . . . ?
B6 B10 B12 B11 -37.70(15) . . . . ?
B5 B10 B12 B11 -100.94(16) . . . . ?
B9 B10 B12 B11 -138.12(16) . . . . ?
B6 B10 B12 B9 100.42(16) . . . . ?
B11 B10 B12 B9 138.12(16) . . . . ?
B5 B10 B12 B9 37.18(14) . . . . ?
B6 B10 B12 B8 63.5(2) . . . . ?
B11 B10 B12 B8 101.15(17) . . . . ?
B5 B10 B12 B8 0.2(2) . . . . ?
B9 B10 B12 B8 -36.97(14) . . . . ?
B6 B10 B12 Cl2 -148.50(14) . . . . ?
B11 B10 B12 Cl2 -110.80(18) . . . . ?
B5 B10 B12 Cl2 148.26(15) . . . . ?
B9 B10 B12 Cl2 111.08(17) . . . . ?
 
_refine_diff_density_max    0.145
_refine_diff_density_min   -0.256
_refine_diff_density_rms    0.036

_shelxl_version_number 2014/6

_shelx_res_file
;
TITL siv61 in Pna2(1)
CELL 0.71073  12.64610   7.19460  11.45960  90.0000  90.0000  90.0000
ZERR    4.00   0.00070   0.00040   0.00070   0.0000   0.0000   0.0000
LATT -1
SYMM -X, -Y, 0.5+Z
SYMM 0.5+X, 0.5-Y, Z
SYMM 0.5-X, 0.5+Y, 0.5+Z
SFAC C H B CL
UNIT 8 40 40 8
TEMP -153.000

ACTA
CONF
HTAB

L.S. 6
BOND $H
FMAP 2
PLAN 10

WGHT    0.031400
FVAR       0.30173
CL1   4    0.052880    0.705663    0.746928    11.00000    0.02896    0.02740 =
         0.01990   -0.00708    0.00962   -0.00845
CL2   4    0.078732    0.214036    0.680291    11.00000    0.02955    0.01995 =
         0.02381    0.00603   -0.00333   -0.00954
C1    1    0.269742    0.700754    0.448881    11.00000    0.02055    0.01806 =
         0.01815    0.00032    0.00508    0.00143
C2    1    0.280631    0.480623    0.418967    11.00000    0.02347    0.02087 =
         0.01993   -0.00036    0.00533    0.00540
B3    3    0.344468    0.564040    0.540152    11.00000    0.01935    0.02287 =
         0.02337    0.00303   -0.00116    0.00088
B4    3    0.257560    0.737535    0.594527    11.00000    0.02069    0.01847 =
         0.01687    0.00083    0.00062   -0.00520
B5    3    0.147478    0.754686    0.496631    11.00000    0.01836    0.01491 =
         0.01714    0.00144    0.00356    0.00044
B6    3    0.165057    0.592104    0.382016    11.00000    0.02424    0.01775 =
         0.01588    0.00131    0.00143    0.00287
B7    3    0.276408    0.347699    0.541048    11.00000    0.02226    0.01919 =
         0.02270    0.00233   -0.00313    0.00251
B8    3    0.258192    0.510879    0.656211    11.00000    0.01981    0.01966 =
         0.01747    0.00244   -0.00353   -0.00401
B9    3    0.135922    0.628314    0.629174    11.00000    0.01815    0.01807 =
         0.01435   -0.00133    0.00256   -0.00384
B10   3    0.078711    0.538500    0.498181    11.00000    0.01867    0.01644 =
         0.01567   -0.00026   -0.00119    0.00006
B11   3    0.165861    0.365137    0.443939    11.00000    0.02495    0.01557 =
         0.01693   -0.00230   -0.00273    0.00202
B12   3    0.147789    0.387493    0.596999    11.00000    0.02057    0.01489 =
         0.01712    0.00130   -0.00242   -0.00271
H1    2    0.309926    0.785729    0.399461    11.00000    0.02823
H2    2    0.329531    0.448599    0.355847    11.00000    0.03350
H3    2    0.428614    0.580135    0.541546    11.00000    0.04088
H4    2    0.292710    0.859900    0.631120    11.00000    0.01926
H5    2    0.116333    0.887899    0.480824    11.00000    0.02579
H6    2    0.148736    0.627887    0.286536    11.00000    0.02738
H7    2    0.322940    0.222208    0.541983    11.00000    0.02519
H8    2    0.285163    0.490634    0.741868    11.00000    0.02360
H10   2   -0.009011    0.530748    0.488066    11.00000    0.03379
H11   2    0.143325    0.259207    0.391964    11.00000    0.03307
HKLF 4

REM  siv61 in Pna2(1)
REM R1 =  0.0220 for    2548 Fo > 4sig(Fo)  and  0.0240 for all    2715 data
REM    167 parameters refined using      1 restraints

END

WGHT      0.0314      0.0000

REM No hydrogen bonds found for HTAB generation

REM Highest difference peak  0.145,  deepest hole -0.256,  1-sigma level  0.036
Q1    1   0.1087  0.6385  0.7687  11.00000  0.05    0.15
Q2    1   0.2841  0.4461  0.6070  11.00000  0.05    0.14
Q3    1   0.4007  0.5933  0.5221  11.00000  0.05    0.13
Q4    1   0.1002  0.6733  0.6794  11.00000  0.05    0.13
Q5    1   0.2053  0.6709  0.6359  11.00000  0.05    0.12
Q6    1   0.4221  0.5141  0.5551  11.00000  0.05    0.12
Q7    1   0.0998  0.6422  0.5568  11.00000  0.05    0.12
Q8    1   0.0601  0.2093  0.6148  11.00000  0.05    0.12
Q9    1   0.2043  0.6994  0.4236  11.00000  0.05    0.11
Q10   1  -0.1004  0.5498  0.5042  11.00000  0.05    0.11
;
_shelx_res_checksum   49190

_shelx_hkl_file
;
   0  -1   0    0.39    0.08
   0  -1   0    0.39    0.07
   0   1   0    0.34    0.06
   0   1   0    0.48    0.08
   0   2   0  605.19   17.11
   0  -2   0  600.39   17.05
   0  -2   0  582.15   17.10
   0  -2   0  589.69   17.10
   0   2   0  597.30   17.05
   0   2   0  568.88   17.10
   0   3   0    0.02    0.19
   0   3   0    0.05    0.14
   0  -3   0   -0.01    0.27
   0  -3   0    0.07    0.18
   0   3   0   -0.06    0.25
   0  -3   0    0.02    0.17
   0   4   0  169.26    4.93
   0  -4   0  166.49    4.95
   0   4   0  167.07    5.05
   0  -4   0  167.77    5.06
   0   5   0   -0.20    0.38
   0  -5   0   -0.08    0.31
   0   5   0   -0.02    0.26
   0  -5   0    0.01    0.32
   0   6   0    3.53    0.60
   0  -6   0    2.93    0.52
   0  -7   0   -0.10    0.50
   0   7   0   -0.02    0.57
   0   8   0    0.63    0.78
   0  -8   0   -0.02    0.69
   0  -9   0   -0.69    0.90
   0   9   0    0.44    0.95
   0   0  -1    0.24    0.03
   0   0   1    0.34    0.04
   0   0  -1    0.09    0.04
   0   0  -1    0.14    0.07
   0   1  -1   38.12    1.13
   0   1   1   36.44    1.13
   0   1   1   36.05    1.08
   0  -1   1   36.96    1.13
   0  -1   1   36.43    1.14
   0  -1   1   37.24    1.13
   0  -1  -1   37.50    1.15
   0   1  -1   37.79    1.13
   0  -1  -1   37.99    1.13
   0   1  -1   36.92    1.14
   0  -1  -1   36.52    1.08
   0   2  -1    0.01    0.15
   0  -2   1    0.19    0.16
   0  -2  -1    0.06    0.19
   0   2  -1   -0.09    0.16
   0   2  -1    0.18    0.13
   0  -2   1   -0.20    0.17
   0   2   1   -0.03    0.13
   0  -2   1    0.26    0.14
   0  -2  -1    0.06    0.12
   0   2   1   -0.11    0.15
   0  -3   1    1.94    0.31
   0   3   1    1.07    0.23
   0   3   1    1.58    0.30
   0   3  -1    1.50    0.28
   0  -3  -1    1.25    0.33
   0  -3   1    1.17    0.22
   0  -3   1    1.71    0.26
   0   3  -1    1.64    0.26
   0   3  -1    1.43    0.24
   0   3   1    1.81    0.14
   0  -4   1   -0.08    0.25
   0   4   1    0.13    0.32
   0   4   1    0.06    0.15
   0   4  -1    0.05    0.26
   0   4  -1    0.03    0.30
   0  -4  -1   -0.04    0.25
   0  -4   1   -0.05    0.27
   0  -5  -1   52.39    1.88
   0   5  -1   54.80    1.88
   0   5  -1   52.46    1.76
   0   5   1   52.13    1.87
   0  -5   1   55.20    1.87
   0  -5   1   53.33    1.79
   0   6  -1   -0.39    0.49
   0  -6  -1    0.27    0.42
   0   6   1   -0.18    0.48
   0  -6   1   -0.23    0.45
   0  -6   1   -0.25    0.42
   0   7   1    8.46    0.85
   0  -7   1   10.27    0.89
   0   7  -1    9.76    0.90
   0  -7  -1    8.53    0.84
   0  -8  -1    0.03    0.67
   0   8  -1   -0.44    0.75
   0  -8   1    0.05    0.71
   0   8   1    0.14    0.75
   0   9  -1    3.13    0.99
   0  -9  -1    2.01    0.97
   0  -9   1    1.79    0.99
   0   9   1    2.76    1.03
   0   0   2  414.41   12.17
   0   0   2  408.50   12.14
   0   0  -2  428.99   12.15
   0   0  -2  427.73   12.12
   0   1   2    0.09    0.11
   0  -1   2    0.21    0.10
   0  -1  -2   -0.02    0.11
   0  -1   2    0.35    0.15
   0   1  -2    0.17    0.11
   0  -1  -2    0.03    0.11
   0  -1  -2    0.10    0.12
   0  -1   2    0.28    0.15
   0   1  -2    0.18    0.12
   0   1  -2    0.05    0.16
   0   1   2    0.04    0.09
   0  -1  -2    0.02    0.08
   0   2  -2  487.09   14.25
   0   2  -2  507.51   14.25
   0  -2   2  492.64   14.28
   0  -2   2  500.21   14.27
   0   2  -2  466.00   14.28
   0  -2  -2  489.96   14.28
   0  -2   2  482.76   14.25
   0   2   2  489.94   14.26
   0  -2  -2  498.13   14.17
   0  -2  -2  499.91   14.32
   0  -3   2    0.21    0.21
   0   3  -2    0.17    0.23
   0  -3   2    0.07    0.25
   0  -3   2   -0.12    0.28
   0   3  -2    0.12    0.22
   0  -3  -2   -0.16    0.18
   0   3   2    0.32    0.24
   0   4   2   60.08    1.96
   0  -4   2   59.88    1.96
   0  -4  -2   57.40    1.97
   0   4  -2   59.53    1.95
   0  -4   2   58.49    1.95
   0  -5  -2    0.05    0.33
   0   5   2    0.01    0.39
   0   5  -2   -0.24    0.40
   0   5  -2    0.11    0.49
   0  -5   2    0.22    0.37
   0  -5   2    0.12    0.40
   0  -6  -2    3.64    0.57
   0   6  -2    3.68    0.60
   0   6   2    3.06    0.57
   0  -6   2    4.69    0.61
   0  -6   2    4.49    0.62
   0  -7  -2   -0.11    0.54
   0  -7   2   -0.36    0.58
   0   7   2   -0.12    0.60
   0   7  -2    0.02    0.62
   0  -8   2   18.73    1.44
   0   8   2   18.80    1.39
   0  -8  -2   17.32    1.34
   0   8  -2   18.71    1.31
   0   9   2   -0.05    0.94
   0  -9  -2   -0.36    0.84
   0  -9   2   -0.02    0.93
   0   9  -2   -0.28    0.93
   0   0   3    0.31    0.09
   0   0   3   -0.05    0.17
   0   0  -3    0.07    0.09
   0   0  -3    0.01    0.20
   0   0  -3   -0.06    0.12
   0   0   3    0.09    0.13
   0   1   3  364.65   10.44
   0  -1  -3  355.93   10.45
   0   1   3  368.49   10.50
   0  -1   3  374.14   10.49
   0  -1  -3  349.81   10.49
   0  -1  -3  363.64   10.48
   0  -1  -3  361.43   10.45
   0  -1   3  362.21   10.53
   0   1  -3  339.82   10.49
   0   1  -3  362.98   10.44
   0  -2  -3    0.44    0.25
   0   2   3   -0.05    0.17
   0   2  -3    0.05    0.17
   0  -2  -3    0.15    0.22
   0  -2   3    0.07    0.19
   0   2  -3    0.12    0.18
   0  -2  -3    0.06    0.10
   0  -2   3    0.05    0.23
   0   2  -3   -0.04    0.28
   0   2   3   -0.13    0.21
   0  -2   3    0.05    0.24
   0  -2  -3    0.07    0.18
   0  -3   3  159.17    4.78
   0  -3  -3  158.20    4.82
   0   3   3  164.34    4.79
   0   3  -3  155.40    4.77
   0   3  -3  158.43    4.83
   0  -3   3  163.82    4.84
   0  -3   3  160.38    4.84
   0   4  -3   -0.07    0.31
   0   4   3   -0.26    0.31
   0  -4   3   -0.01    0.34
   0  -4  -3    0.18    0.27
   0  -4   3   -0.04    0.29
   0  -5  -3  101.34    3.36
   0  -5   3  100.72    3.33
   0   5   3  106.17    3.34
   0  -5   3  109.51    3.36
   0   5  -3  104.11    3.32
   0  -6  -3    0.01    0.43
   0   6   3    0.06    0.81
   0   6  -3   -0.28    0.50
   0  -6   3   -0.04    0.54
   0  -6   3    0.56    0.50
   0  -7   3    7.12    0.82
   0  -7  -3    4.36    0.72
   0   7   3    6.11    0.81
   0   7  -3    5.62    0.79
   0   8  -3   -0.43    0.78
   0   8   3   -0.03    0.78
   0  -8   3   -0.23    0.76
   0  -8  -3    0.08    0.73
   0   9  -3   43.42    2.12
   0  -9  -3   39.19    2.19
   0  -9   3   42.68    2.29
   0   0   4  472.64   13.77
   0   0  -4  472.29   13.71
   0   0  -4  473.40   13.77
   0   0   4  473.24   13.72
   0   0   4  479.41   13.82
   0  -1   4    0.15    0.23
   0  -1   4    0.18    0.15
   0   1   4    0.02    0.13
   0   1   4    0.17    0.20
   0  -1  -4    0.15    0.25
   0   1  -4    0.09    0.21
   0  -1  -4    0.02    0.17
   0   1  -4    0.05    0.14
   0   1  -4    0.12    0.31
   0  -1   4   -0.17    0.16
   0  -1  -4    0.07    0.18
   0   2  -4  205.72    5.99
   0   2   4  207.80    6.10
   0  -2   4  206.41    5.99
   0  -2  -4  202.13    5.96
   0   2  -4  199.30    6.03
   0  -2  -4  197.32    6.01
   0  -2  -4  199.85    5.99
   0   2   4  207.38    6.00
   0  -2   4  208.86    6.06
   0  -2   4  203.47    6.18
   0  -3  -4   -0.09    0.23
   0  -3   4   -0.04    0.32
   0  -3   4    0.02    0.33
   0  -3  -4    0.10    0.14
   0  -3  -4    0.03    0.25
   0  -3   4    0.48    0.34
   0   3   4   -0.23    0.24
   0   4  -4  140.59    4.21
   0   4   4  135.42    4.21
   0  -4   4  135.62    4.27
   0  -4   4  139.88    4.26
   0  -4  -4  135.98    4.26
   0   5   4   -0.12    0.41
   0   5  -4   -0.11    0.42
   0  -5  -4    0.00    0.36
   0  -5   4   -0.09    0.42
   0  -5   4   -0.13    0.50
   0   6   4    4.11    0.65
   0  -6   4    3.09    0.64
   0   6  -4    4.36    0.66
   0  -6  -4    4.78    0.63
   0  -6   4    5.01    0.72
   0   7   4    0.00    0.66
   0  -7   4    0.27    0.72
   0   7  -4    0.35    0.64
   0  -7   4   -0.15    0.67
   0  -7  -4    0.36    0.59
   0  -8  -4   22.21    1.57
   0  -8   4   21.29    1.62
   0   8   4   21.41    1.48
   0   8  -4   22.72    1.55
   0   9   4    0.09    0.97
   0   9  -4    0.85    0.99
   0  -9   4   -0.27    1.05
   0   0   5    0.04    0.34
   0   0   5   -0.06    0.18
   0   0  -5   -0.19    0.37
   0   0  -5    0.14    0.22
   0   0   5    0.11    0.14
   0   0  -5    0.18    0.16
   0   1   5  263.98    7.61
   0   1   5  264.30    7.51
   0  -1   5  263.73    7.67
   0  -1   5  261.69    7.57
   0   1  -5  253.04    7.51
   0  -1  -5  245.17    7.60
   0  -1  -5  245.32    7.56
   0   1  -5  268.24    7.52
   0  -1  -5  254.87    7.56
   0  -1  -5  256.15    7.63
   0   1  -5  253.68    7.60
   0   2  -5    0.45    0.23
   0   2  -5   -0.20    0.29
   0  -2  -5   -0.06    0.19
   0  -2   5    0.03    0.33
   0   2   5    0.13    0.28
   0   2   5   -0.06    0.19
   0  -2  -5    0.01    0.42
   0  -2   5   -0.04    0.27
   0  -2  -5    0.06    0.30
   0   3   5  122.46    3.62
   0  -3  -5  120.84    3.70
   0   3  -5  119.63    3.62
   0  -3   5  119.99    3.71
   0  -3  -5  113.45    3.58
   0  -3   5  119.94    3.76
   0  -3  -5  115.96    3.52
   0   4   5    0.14    0.32
   0  -4   5   -0.13    0.45
   0   4  -5    0.07    0.34
   0  -4  -5    0.35    0.40
   0  -4  -5   -0.10    0.30
   0  -4   5   -0.18    0.45
   0  -4  -5    0.18    0.19
   0  -5   5   27.22    1.39
   0   5  -5   31.56    1.27
   0  -5   5   29.52    1.40
   0   5   5   29.46    1.25
   0  -5  -5   28.00    1.27
   0  -6   5   -0.30    0.57
   0   6   5    0.03    0.53
   0  -6   5   -0.11    0.64
   0   6  -5    0.25    0.56
   0  -6  -5   -0.21    0.48
   0  -7   5    4.77    0.89
   0   7   5    3.75    0.77
   0  -7   5    3.18    0.82
   0  -7  -5    3.69    0.72
   0   7  -5    4.95    0.79
   0   8  -5    0.19    0.86
   0  -8   5   -0.60    0.87
   0  -8  -5    0.04    0.74
   0   8   5    0.01    0.79
   0  -9   5   27.38    2.16
   0  -9  -5   25.72    1.94
   0   9   5   25.45    1.90
   0   9  -5   26.03    1.88
   0   0   6   29.13    1.12
   0   0   6   26.34    0.93
   0   0   6   26.54    1.01
   0   1  -6    0.05    0.20
   0  -1   6    0.06    0.35
   0   1   6    0.25    0.17
   0   1   6    0.10    0.28
   0  -1   6   -0.10    0.23
   0  -1  -6    0.21    0.27
   0  -1  -6    0.07    0.25
   0  -2   6   15.62    0.72
   0  -2  -6   13.86    0.89
   0   2   6   14.94    0.63
   0   2   6   14.98    0.82
   0  -2   6   14.70    0.87
   0   2  -6   14.14    0.64
   0  -2  -6   13.97    0.66
   0  -3  -6    0.25    0.45
   0  -3   6    0.31    0.35
   0   3   6    0.20    0.27
   0   3   6   -0.03    0.40
   0  -3  -6   -0.09    0.22
   0  -3   6   -0.07    0.43
   0   3  -6    0.04    0.30
   0  -4  -6   25.92    0.91
   0   4   6   25.61    1.08
   0   4  -6   26.80    1.11
   0  -4   6   24.70    1.29
   0  -4   6   24.32    1.23
   0  -4  -6   26.70    1.16
   0   5   6    0.14    0.44
   0  -5  -6   -0.13    0.43
   0  -5   6    0.00    0.57
   0  -5   6   -0.01    0.61
   0   5  -6    0.42    0.47
   0  -6   6   11.90    1.07
   0  -6  -6   12.02    1.00
   0  -6   6   11.96    1.05
   0   6  -6   13.95    0.95
   0   6   6   14.87    1.05
   0   7   6    0.02    0.69
   0  -7   6    0.30    0.87
   0  -7   6    0.16    0.86
   0   7  -6    0.60    0.72
   0  -7  -6    0.31    0.63
   0   8   6    7.53    1.05
   0   8  -6    9.39    1.11
   0  -8   6    7.01    1.28
   0  -8  -6    9.36    1.16
   0  -9  -6    0.18    1.08
   0   9   6    0.12    0.98
   0   9  -6    0.36    1.09
   0   0   7   -0.03    0.27
   0   0  -7    0.01    0.23
   0   0   7    0.01    0.38
   0   0  -7    0.05    0.27
   0  -1  -7  470.32   14.00
   0   1  -7  480.63   13.92
   0   1   7  499.62   13.91
   0   1  -7  469.76   13.88
   0   1   7  477.88   14.03
   0  -1   7  473.10   14.11
   0  -1   7  475.79   13.99
   0   2  -7    0.10    0.36
   0  -2   7   -0.10    0.42
   0  -2  -7   -0.10    0.29
   0   2   7   -0.02    0.25
   0   2   7   -0.13    0.38
   0  -2   7   -0.09    0.30
   0   3   7  364.42   10.77
   0  -3  -7  362.62   10.60
   0   3  -7  356.94   10.56
   0   3   7  362.45   10.57
   0  -3   7  350.77   10.77
   0  -3   7  361.97   10.65
   0   4  -7   -0.09    0.40
   0   4   7   -0.19    0.35
   0  -4   7    0.02    0.57
   0  -4  -7    0.23    0.28
   0  -4   7    0.22    0.45
   0  -4  -7    0.03    0.40
   0   5  -7   11.22    0.81
   0  -5  -7   10.94    0.87
   0   5   7   10.85    0.89
   0  -5   7   10.64    0.91
   0  -5   7   10.79    1.00
   0  -6   7   -0.55    0.73
   0  -6   7   -0.32    0.68
   0   6   7   -0.10    0.55
   0   6  -7    0.00    0.61
   0  -6  -7    0.05    0.54
   0   7  -7   11.08    1.04
   0  -7  -7   11.25    1.11
   0  -7   7   11.82    1.25
   0   7   7   10.23    1.01
   0  -8  -7   -0.24    0.87
   0   8   7    0.03    0.84
   0  -8   7    0.40    1.14
   0   8  -7    0.78    0.93
   0   0  -8   23.20    0.93
   0   0   8   24.81    1.19
   0   0  -8   22.64    1.20
   0   0   8   23.67    1.06
   0  -1   8    0.14    0.46
   0  -1  -8   -0.03    0.38
   0   1  -8   -0.07    0.32
   0   1   8   -0.26    0.39
   0   1   8    0.02    0.24
   0  -1   8   -0.12    0.34
   0  -2  -8   22.30    1.00
   0   2   8   21.75    0.90
   0   2   8   22.87    1.17
   0  -2   8   23.84    1.24
   0   2  -8   23.40    0.94
   0  -2   8   22.07    1.04
   0   3   8   -0.08    0.32
   0  -3   8    0.02    0.40
   0   3  -8   -0.02    0.35
   0  -3   8    0.24    0.55
   0  -3  -8    0.00    0.34
   0   3   8    0.06    0.53
   0  -4   8    0.27    0.64
   0  -4   8    0.46    0.47
   0   4  -8    1.41    0.47
   0  -4  -8    0.95    0.36
   0   4   8    0.86    0.41
   0  -5   8    0.46    0.74
   0  -5  -8    0.01    0.49
   0  -5   8    0.31    0.63
   0   5  -8    0.20    0.53
   0   5   8   -0.17    0.46
   0   6   8   16.30    1.14
   0  -6   8   16.67    1.31
   0   6  -8   17.64    1.31
   0  -6   8   18.58    1.40
   0  -6  -8   14.76    1.19
   0   7   8   -0.26    0.72
   0  -7  -8   -0.08    0.75
   0  -7   8   -0.27    0.85
   0   7  -8    0.70    0.83
   0   7  -8    0.01    0.85
   0   8  -8    3.50    1.74
   0  -8  -8    2.23    1.00
   0   8   8    3.34    1.51
   0   0  -9   -0.10    0.43
   0   0   9    0.20    0.41
   0   0  -9   -0.05    0.31
   0   1   9  226.05    6.99
   0  -1   9  222.90    7.09
   0  -1  -9  234.40    6.96
   0   1  -9  240.63    6.84
   0  -1   9  228.17    6.94
   0   1   9  228.07    6.83
   0  -2   9    0.09    0.58
   0   2   9    0.41    0.34
   0   2   9    0.70    0.54
   0  -2   9    0.17    0.43
   0  -2  -9    0.06    0.41
   0   2  -9   -0.28    0.35
   0   3   9   40.08    1.49
   0  -3   9   43.83    2.48
   0  -3   9   39.82    1.60
   0  -3  -9   40.51    1.51
   0   3  -9   42.77    1.51
   0   3   9   40.03    1.82
   0   4   9   -0.26    0.41
   0  -4  -9    0.05    0.51
   0   4  -9   -0.14    0.46
   0  -4   9    0.12    0.50
   0  -4   9    0.35    0.72
   0  -5  -9    6.72    0.79
   0   5   9    7.64    0.75
   0   5  -9    8.12    0.78
   0  -5   9    8.38    0.86
   0  -5   9    8.79    1.06
   0   6   9   -0.06    0.60
   0  -6   9    0.42    0.72
   0  -6  -9   -0.32    0.65
   0  -6   9   -0.11    0.91
   0   7  -9    2.53    1.02
   0  -7  -9    2.40    0.89
   0  -7   9    3.26    1.09
   0   7   9    3.11    0.83
   0   0  10   29.03    1.38
   0   0 -10   31.79    1.23
   0   0 -10   32.01    1.44
   0  -1  10   -0.25    0.44
   0   1  10    0.19    0.39
   0   1 -10   -0.01    0.38
   0   1  10    0.54    0.55
   0  -1 -10    0.51    0.51
   0  -2  10   33.00    1.44
   0  -2 -10   33.50    1.43
   0   2 -10   34.28    1.31
   0   2  10   33.00    1.29
   0   2  10   35.05    1.74
   0  -2  10   34.31    1.68
   0  -3  10    0.18    0.49
   0   3  10    0.14    0.40
   0  -3  10    0.00    0.71
   0  -3 -10    0.16    0.48
   0   3  10   -0.06    0.67
   0   3 -10   -0.61    0.43
   0  -4 -10   13.86    1.11
   0  -4  10   12.93    1.21
   0   4  10   14.85    1.10
   0  -4  10   15.39    1.09
   0  -5 -10    0.45    0.63
   0  -5  10    0.39    0.66
   0  -5  10    0.38    0.90
   0   5  10    0.33    0.58
   0  -6 -10   36.14    1.88
   0   6  10   33.54    1.66
   0   6 -10   36.37    2.03
   0  -6  10   34.83    1.84
   0   7  10   -0.12    0.84
   0  -7 -10    0.19    0.90
   0   7 -10    0.27    1.07
   0   0 -11    0.16    0.45
   0   0 -11    0.02    0.59
   0   0  11   -0.06    0.56
   0   1 -11   79.47    2.89
   0  -1 -11   76.35    2.82
   0  -1  11   81.18    2.79
   0   1  11   84.70    2.92
   0  -2  11   -0.25    0.54
   0   2  11   -0.45    0.43
   0   2 -11    0.09    0.63
   0  -2 -11    0.46    0.56
   0   2  11    0.29    0.70
   0   3  11    3.53    0.88
   0  -3 -11    5.07    0.69
   0  -3  11    4.86    0.82
   0   3  11    5.70    0.62
   0   4  11    0.33    0.53
   0  -4 -11    0.06    0.67
   0   4 -11   -0.11    0.78
   0  -4  11    0.39    0.65
   0   5  11    5.67    0.79
   0  -5  11    3.98    0.84
   0  -5 -11    5.42    0.92
   0   5 -11    6.01    1.07
   0  -6 -11    0.05    0.90
   0   6  11    0.13    0.73
   0   6 -11    0.29    1.01
   0   0  12   93.40    3.24
   0   0 -12   92.05    3.27
   0   1 -12    0.13    0.72
   0   1  12   -0.51    0.71
   0  -1  12    0.37    0.65
   0  -1 -12    0.29    0.66
   0  -2  12   50.88    2.04
   0   2 -12   49.67    2.21
   0  -2 -12   49.19    2.00
   0   2  12   48.52    1.85
   0   2  12   46.96    2.21
   0   3  12   -0.40    0.88
   0   3  12   -0.38    0.56
   0   3 -12    0.16    0.82
   0  -3 -12   -0.31    1.01
   0  -3  12   -0.01    0.69
   0   4  12   80.00    2.86
   0  -4 -12   79.63    3.08
   0   4 -12   85.64    3.26
   0  -4  12   85.42    3.04
   0   5  12   -0.41    0.70
   0   5 -12   -0.49    0.99
   0  -5 -12   -0.10    0.81
   0   6  12    0.55    0.84
   0  -6 -12    0.63    0.95
   0   6 -12    1.05    1.16
   0   0 -13   -0.24    0.75
   0   0  13   -0.14    0.82
   0  -1  13   17.93    1.45
   0   1 -13   19.77    1.40
   0  -1 -13   18.89    1.45
   0   1  13   18.64    1.38
   0  -2 -13    0.13    0.75
   0   2  13    0.36    0.96
   0   2 -13   -0.05    0.85
   0  -2  13    0.56    0.76
   0   3 -13   41.60    2.19
   0  -3  13   40.11    1.96
   0   3  13   38.88    2.30
   0   4 -13   -0.81    1.02
   0  -4 -13    0.06    0.88
   0  -5 -13   11.14    1.30
   0   5 -13    9.05    1.41
   0   0  14   75.12    3.03
   0   0 -14   78.03    3.06
   0  -1 -14   -0.01    0.84
   0   1 -14    0.67    0.93
   0   1  14   -0.61    1.01
   0  -1  14    0.53    0.91
   0   2 -14   68.62    2.86
   0  -2  14   66.99    2.74
   0   2  14   63.52    2.94
   0  -2 -14   61.64    2.62
   0   3  14    0.16    1.20
   0   3 -14   -0.10    1.39
   0  -3  14   -0.25    1.38
   0  -4 -14    0.87    1.00
   0   4 -14    1.12    1.18
   0   0 -15   -0.03    0.99
   0   0  15    0.86    1.17
   0   1  15    1.93    1.24
   0  -1 -15    2.05    1.03
   0   1 -15    2.33    1.49
   0  -1  15    2.87    1.22
   0   2 -15    0.19    1.09
   0   2  15   -0.19    1.47
   0  -2 -15   -0.38    1.42
   1   0   0    0.01    0.04
  -1   0   0   -0.01    0.03
   1   0   0    0.00    0.03
   1  -1   0   84.19    2.43
   1  -1   0   84.41    2.41
  -1   1   0   81.71    2.45
  -1  -1   0   82.88    2.44
  -1   1   0   86.46    2.44
   1   1   0   71.09    2.42
  -1  -1   0   86.21    2.43
  -1   1   0   84.50    2.42
  -1  -2   0   54.22    1.65
   1   2   0   53.62    1.64
   1   2   0   47.76    1.61
   1  -2   0   53.67    1.67
   1  -2   0   54.11    1.66
  -1  -2   0   54.40    1.68
  -1   2   0   55.81    1.60
  -1   2   0   55.50    1.66
  -1  -2   0   53.10    1.63
  -1   3   0   19.99    0.81
  -1   3   0   18.18    0.75
  -1  -3   0   18.69    0.73
  -1   3   0   16.55    0.65
   1   3   0   22.32    0.90
  -1  -3   0   18.50    0.80
  -1  -3   0   19.74    0.70
   1   3   0   18.53    0.73
   1   3   0   18.74    0.66
   1  -3   0   19.41    0.79
  -1  -4   0   41.06    1.42
   1   4   0   39.38    1.44
  -1   4   0   39.80    1.28
   1  -4   0   41.15    1.44
  -1   4   0   40.46    1.43
  -1  -4   0   41.20    1.35
   1   4   0   40.15    1.31
  -1   4   0   40.60    1.27
  -1   5   0    4.31    0.52
   1   5   0    3.18    0.51
  -1  -5   0    4.45    0.45
  -1   5   0    4.44    0.34
  -1  -5   0    3.91    0.47
  -1   5   0    3.92    0.31
   1   5   0    4.27    0.39
   1  -5   0    3.19    0.45
  -1  -6   0  107.13    3.32
   1  -6   0  106.01    3.48
   1   6   0  103.65    3.47
  -1   6   0  106.72    3.45
  -1  -6   0  109.58    3.48
  -1  -7   0    5.27    0.70
  -1   7   0    5.17    0.74
   1   7   0    5.53    0.79
   1  -7   0    5.45    0.72
  -1  -8   0   44.78    1.93
   1  -8   0   39.52    1.94
  -1   8   0   39.86    1.87
   1   8   0   38.55    1.89
  -1  -9   0    0.10    0.91
   1   9   0    0.10    0.93
   1  -9   0   -0.16    0.91
  -1   9   0    0.36    0.96
  -1   0  -1    0.78    0.09
  -1   0   1    0.50    0.06
   1   0  -1    0.68    0.07
   1   0  -1    0.62    0.05
   1   0  -1    0.63    0.08
   1   0   1    0.66    0.08
  -1   1   1  752.63   21.78
   1   1  -1  761.06   21.80
  -1  -1  -1  750.29   21.78
  -1  -1  -1  750.77   21.80
   1   1   1  747.74   21.80
  -1   1  -1  784.41   21.80
   1   1   1  748.82   21.78
   1  -1  -1  736.68   21.78
  -1  -1   1  761.87   21.81
   1   2  -1  159.04    4.66
  -1  -2  -1  155.97    4.65
   1  -2   1  164.72    4.64
   1   2  -1  155.65    4.64
   1   2  -1  150.16    4.62
  -1   2   1  148.70    4.65
  -1  -2  -1  157.90    4.65
  -1  -2  -1  164.28    4.60
   1  -2   1  161.48    4.66
  -1   2   1  158.29    4.65
  -1  -2  -1  156.92    4.67
   1  -2   1  159.26    4.64
  -1  -2   1  156.79    4.65
   1   2   1  157.83    4.66
  -1  -2   1  162.07    4.63
  -1   2  -1  155.07    4.66
   1  -2  -1  157.32    4.67
   1  -2  -1  158.55    4.65
   1   2   1  150.93    4.59
  -1   2  -1  159.70    4.63
   1  -3   1    3.05    0.34
  -1  -3  -1    2.21    0.26
   1  -3   1    3.22    0.29
   1   3  -1    2.31    0.27
  -1  -3  -1    2.33    0.21
  -1   3   1    3.01    0.37
  -1   3   1    2.74    0.30
  -1  -3  -1    2.45    0.37
   1   3  -1    1.97    0.36
  -1   3  -1    2.68    0.29
   1   3   1    3.17    0.23
  -1  -3   1    2.90    0.36
  -1   3  -1    2.91    0.30
   1  -3  -1    2.13    0.34
   1  -3  -1    2.76    0.30
   1   3   1    2.69    0.33
  -1  -3   1    2.76    0.30
  -1  -3   1    2.48    0.27
  -1   3  -1    1.91    0.28
   1  -4   1  295.02    8.61
  -1  -4  -1  291.52    8.60
   1   4  -1  287.21    8.59
  -1   4   1  289.28    8.58
   1  -4   1  290.28    8.51
   1   4  -1  298.45    8.57
  -1   4  -1  292.51    8.51
  -1  -4   1  298.43    8.58
  -1  -4   1  288.68    8.54
   1   4   1  277.53    8.45
  -1   4  -1  292.51    8.58
   1  -4  -1  288.12    8.62
   1   4   1  286.74    8.59
  -1  -5  -1    0.37    0.32
  -1   5   1    0.61    0.38
   1   5  -1    0.57    0.43
  -1  -5  -1    0.74    0.31
   1  -5   1    0.43    0.36
   1   5  -1    0.71    0.38
   1  -5  -1    0.56    0.35
  -1  -5   1    0.49    0.40
  -1   5  -1    0.39    0.41
  -1  -5   1    0.62    0.33
   1   5   1    0.53    0.40
   1   5   1    0.24    0.29
  -1   6   1  146.23    4.58
   1   6  -1  143.14    4.59
  -1  -6  -1  145.05    4.60
   1  -6   1  148.46    4.61
   1   6   1  143.92    4.60
  -1   6  -1  148.98    4.38
  -1  -6   1  144.68    4.57
   1  -6  -1  144.09    4.61
  -1  -6   1  142.76    4.48
  -1   6  -1  151.45    4.59
  -1   7   1   14.52    1.07
  -1  -7  -1   12.73    1.05
   1  -7   1   11.51    0.95
   1   7  -1   15.24    1.07
   1   7   1   14.58    1.04
   1  -7  -1   13.74    1.09
  -1   7  -1   13.06    0.97
  -1   8   1   41.04    1.96
   1   8  -1   41.23    1.97
   1  -8   1   42.60    2.02
  -1  -8  -1   41.21    1.95
   1  -8  -1   43.66    1.99
  -1  -8   1   45.43    1.99
   1   8   1   44.70    1.98
  -1   8  -1   44.85    1.98
  -1   9   1    0.53    0.96
   1  -9   1    0.87    0.94
  -1  -9  -1    0.34    0.86
   1   9  -1    0.75    0.99
   1  -9  -1    0.07    0.90
  -1  -9   1   -0.96    0.90
  -1   9  -1    0.94    1.01
   1   9   1    1.16    1.00
   1   0   2    0.19    0.04
  -1   0  -2    0.20    0.05
   1   0  -2    0.06    0.13
   1   0   2    0.15    0.09
  -1   0  -2    0.18    0.10
  -1   0   2    0.23    0.08
   1   0  -2    0.29    0.09
  -1   0   2    0.28    0.08
  -1   0   2    0.19    0.13
  -1   0  -2    0.29    0.10
   1   0  -2    0.12    0.07
   1   0   2    0.10    0.10
   1   1  -2    5.03    0.33
   1   1  -2    5.05    0.23
  -1  -1  -2    4.46    0.25
   1   1  -2    5.10    0.27
   1  -1   2    4.93    0.36
  -1   1   2    4.72    0.27
  -1  -1  -2    4.65    0.22
   1  -1   2    4.92    0.23
  -1  -1  -2    4.74    0.28
  -1   1   2    4.65    0.24
  -1  -1   2    4.66    0.33
   1  -1  -2    4.62    0.25
   1  -1  -2    4.54    0.25
   1  -1  -2    4.58    0.24
  -1  -1   2    4.81    0.27
  -1   1  -2    4.90    0.31
   1   1   2    4.64    0.29
  -1   1  -2    4.43    0.22
  -1   1  -2    4.66    0.35
   1   1   2    4.81    0.24
  -1   1  -2    4.96    0.27
   1   1   2    4.15    0.23
  -1  -1   2    5.01    0.26
   1  -1  -2    4.55    0.30
   1   2  -2   54.77    1.71
   1   2  -2   53.51    1.67
   1  -2   2   55.41    1.73
   1  -2   2   54.02    1.68
  -1   2   2   51.26    1.75
   1   2  -2   53.06    1.74
  -1  -2  -2   55.14    1.64
   1  -2   2   55.61    1.73
  -1  -2  -2   53.68    1.72
  -1   2   2   56.20    1.70
   1   2   2   53.17    1.63
  -1   2  -2   53.79    1.76
  -1   2  -2   55.20    1.75
   1   2   2   56.43    1.71
  -1  -2   2   55.34    1.75
  -1   2  -2   55.78    1.68
  -1  -2   2   56.29    1.69
   1  -2  -2   54.08    1.73
   1  -2  -2   54.24    1.72
   1   2   2   56.42    1.76
  -1  -2   2   54.62    1.71
   1  -3   2   53.40    1.76
   1   3  -2   50.71    1.65
   1  -3   2   48.14    1.62
  -1  -3  -2   50.67    1.65
  -1  -3  -2   51.31    1.52
   1  -3   2   49.47    1.64
   1   3  -2   48.01    1.60
  -1   3   2   50.92    1.63
   1   3  -2   49.88    1.66
  -1   3  -2   48.66    1.70
   1   3   2   50.85    1.64
  -1  -3   2   52.45    1.62
  -1  -3   2   50.59    1.66
   1   3   2   48.13    1.51
  -1   3  -2   48.47    1.64
  -1  -3   2   48.16    1.65
  -1   3  -2   52.28    1.62
   1  -3  -2   49.51    1.66
  -1  -4  -2   37.27    1.20
   1  -4   2   38.79    1.39
  -1   4   2   37.18    1.37
   1  -4   2   37.71    1.35
   1   4  -2   40.10    1.40
  -1  -4  -2   37.24    1.36
   1   4  -2   36.67    1.37
  -1   4  -2   38.96    1.36
   1   4   2   37.40    1.18
   1  -4  -2   38.00    1.38
  -1  -4   2   37.85    1.34
  -1  -4   2   39.36    1.45
   1   4   2   37.36    1.37
  -1   5   2   34.14    1.34
  -1  -5  -2   33.06    1.35
   1   5  -2   31.54    1.35
   1  -5   2   36.77    1.38
  -1  -5  -2   33.19    1.13
  -1  -5   2   36.70    1.34
  -1  -5   2   33.39    1.35
   1  -5  -2   35.19    1.37
  -1   5  -2   32.91    1.35
   1   5   2   32.04    1.37
  -1   5  -2   34.08    1.32
   1   6  -2   20.63    1.16
  -1  -6  -2   20.33    1.08
   1  -6   2   18.14    1.11
  -1   6   2   19.64    1.07
   1   6   2   19.41    1.10
  -1  -6   2   18.84    1.11
  -1   6  -2   21.03    1.11
   1  -6  -2   20.25    1.10
  -1   6  -2   19.80    0.93
  -1  -6   2   19.26    1.07
   1  -7   2   32.01    1.56
   1   7  -2   29.33    1.49
  -1  -7  -2   30.76    1.51
  -1   7   2   29.86    1.47
   1  -7  -2   29.09    1.48
   1   7   2   30.66    1.50
  -1   7  -2   33.21    1.52
   1   8  -2    0.31    0.82
  -1  -8  -2    0.81    0.72
   1  -8   2   -0.11    0.74
  -1   8   2    1.01    0.79
   1  -8  -2   -0.05    0.70
  -1  -8   2    0.46    0.77
   1   8   2    0.36    0.78
  -1   8  -2    0.40    0.75
  -1  -9  -2    1.76    0.90
   1   9  -2    3.43    1.08
  -1   9   2    2.26    0.96
   1  -9   2    1.97    1.02
  -1  -9   2    0.84    0.97
   1   9   2    1.65    1.07
  -1   9  -2    1.56    0.99
   1  -9  -2    2.01    0.94
  -1   0  -3    0.18    0.14
  -1   0   3   -0.03    0.12
   1   0  -3    0.05    0.18
   1   0  -3   -0.01    0.10
  -1   0   3    0.09    0.11
   1   0   3   -0.24    0.13
  -1   0  -3    0.00    0.14
  -1   0   3   -0.02    0.18
  -1   0  -3    0.02    0.22
   1   0  -3    0.06    0.12
  -1   0  -3    0.08    0.07
   1   1  -3   15.66    0.55
   1   1  -3   13.77    0.55
   1  -1   3   13.38    0.60
   1  -1   3   14.94    0.48
  -1   1   3   14.10    0.51
  -1  -1  -3   14.30    0.52
  -1   1   3   14.16    0.57
   1  -1   3   13.47    0.61
  -1  -1  -3   13.41    0.55
  -1  -1  -3   14.13    0.51
  -1   1   3   14.23    0.55
  -1   1  -3   14.06    0.64
  -1   1  -3   14.91    0.49
  -1   1  -3   13.97    0.62
   1   1   3   14.07    0.58
   1   1   3   13.81    0.50
   1  -1  -3   14.30    0.54
   1  -1  -3   13.71    0.55
   1  -1  -3   14.95    0.57
  -1  -1   3   14.02    0.62
  -1  -1   3   13.92    0.52
   1   1   3   14.17    0.54
  -1  -1   3   14.80    0.54
  -1  -2  -3  158.97    4.77
  -1  -2  -3  157.68    4.68
  -1  -2  -3  159.65    4.78
   1  -2   3  160.20    4.79
   1   2  -3  161.57    4.71
   1  -2   3  161.26    4.80
   1   2  -3  167.39    4.74
  -1   2   3  161.91    4.73
  -1  -2   3  160.14    4.80
   1  -2  -3  163.69    4.77
  -1  -2   3  153.50    4.74
  -1   2  -3  155.08    4.76
   1   2   3  160.73    4.80
   1  -2  -3  157.22    4.74
   1  -2  -3  157.86    4.79
  -1   2  -3  160.00    4.80
  -1   2  -3  166.03    4.70
   1   2   3  161.95    4.73
   1   2   3  155.76    4.68
   1  -2  -3  155.11    4.67
   1  -3   3   51.52    1.69
   1   3  -3   47.23    1.60
   1  -3   3   49.60    1.63
  -1  -3  -3   49.42    1.53
   1  -3   3   50.63    1.69
   1   3  -3   50.31    1.71
  -1  -3  -3   51.28    1.66
   1   3  -3   51.14    1.65
  -1   3   3   50.20    1.63
  -1  -3   3   43.83    1.87
  -1   3  -3   52.02    1.62
   1   3   3   51.28    1.64
  -1  -3   3   50.47    1.63
   1   3   3   49.33    1.52
  -1   3  -3   48.43    1.72
   1  -3  -3   49.13    1.66
  -1  -4  -3   99.52    3.19
   1  -4   3  100.35    3.18
  -1  -4  -3  103.37    3.00
   1  -4   3   99.10    3.20
  -1   4   3  102.51    3.16
   1   4  -3   99.92    3.17
   1  -4  -3   98.28    3.20
   1   4   3  102.14    3.17
   1   4   3   97.77    2.99
  -1  -4   3  103.48    3.16
  -1  -4   3  102.41    3.21
  -1   4  -3  105.10    3.15
   1   5  -3   40.04    1.55
   1  -5   3   40.62    1.54
   1  -5   3   43.54    1.58
  -1  -5  -3   40.49    1.54
  -1   5   3   39.26    1.51
  -1  -5   3   41.44    1.53
  -1   5  -3   40.39    1.51
  -1  -5   3   38.24    1.56
   1  -5  -3   38.81    1.55
   1   5   3   38.57    1.52
  -1  -6  -3   92.75    3.15
   1  -6   3   93.27    3.17
   1   6  -3   94.41    3.14
   1  -6  -3   98.40    3.45
  -1   6  -3   92.97    3.00
   1   6   3  100.83    3.44
  -1  -6   3   90.43    3.12
  -1  -6   3   93.17    3.12
  -1   6  -3   94.34    3.11
  -1   7   3   13.49    0.99
   1   7  -3   14.78    1.04
   1  -7   3   14.27    1.06
  -1  -7  -3   11.39    0.95
   1   7   3   15.68    1.13
  -1   7  -3   13.47    0.99
   1  -7  -3   12.57    0.99
  -1  -7   3   12.29    1.42
  -1   8   3   63.25    2.54
   1   8  -3   64.94    2.58
   1  -8   3   63.75    2.61
  -1  -8  -3   63.95    2.58
   1   8   3   62.80    2.56
   1  -8  -3   63.20    2.56
  -1   8  -3   65.09    2.52
  -1  -8   3   63.47    2.57
   1  -9   3    0.63    1.06
  -1  -9  -3    1.09    0.97
   1   9  -3    1.26    1.04
   1  -9  -3    1.52    0.96
  -1  -9   3    0.64    1.03
  -1   9  -3    1.87    1.00
  -1   0  -4    0.29    0.29
  -1   0   4   -0.01    0.21
   1   0  -4    0.05    0.15
   1   0  -4    0.00    0.15
  -1   0   4   -0.03    0.15
  -1   0  -4   -0.04    0.10
   1   0   4   -0.02    0.16
   1   0   4   -0.01    0.09
  -1   0   4    0.24    0.13
  -1   0  -4    0.00    0.16
  -1   0  -4   -0.09    0.17
  -1   1   4    8.74    0.38
  -1  -1  -4    8.09    0.45
   1   1  -4    7.79    0.44
   1  -1   4    8.27    0.46
  -1  -1  -4    8.22    0.39
   1  -1   4    7.86    0.52
  -1   1   4    8.34    0.46
  -1   1   4    7.84    0.45
   1  -1   4    8.18    0.35
  -1  -1  -4    8.31    0.40
  -1  -1  -4    8.31    0.54
   1   1  -4    8.97    0.42
  -1   1  -4    7.94    0.52
   1   1   4    7.66    0.45
  -1   1  -4    8.29    0.34
  -1   1  -4    7.93    0.63
  -1  -1   4    6.75    0.50
  -1  -1   4    7.95    0.39
   1  -1  -4    8.08    0.44
  -1  -1   4    8.05    0.43
   1   1   4    8.07    0.35
   1  -1  -4    7.63    0.48
  -1   2   4   12.36    0.53
   1  -2   4   12.19    0.66
   1  -2   4   11.51    0.64
  -1  -2  -4   12.31    0.59
   1   2  -4   12.10    0.55
  -1  -2  -4   12.42    0.61
  -1  -2  -4   11.86    0.49
   1  -2   4   12.04    0.52
   1   2  -4   12.19    0.56
  -1  -2   4   13.13    0.58
   1  -2  -4   12.21    0.55
   1   2   4   12.19    0.62
  -1   2  -4   11.88    0.51
  -1   2  -4   11.75    0.62
  -1  -2   4   11.27    0.67
   1  -2  -4   11.77    0.57
   1  -2  -4   12.41    0.70
   1  -2  -4   11.10    0.58
  -1  -2   4   11.97    0.58
   1   2   4   11.67    0.52
  -1  -3  -4   45.51    1.60
   1  -3   4   49.69    1.70
   1   3  -4   43.52    1.54
   1  -3   4   45.60    1.55
  -1   3   4   47.22    1.56
  -1  -3  -4   48.18    1.47
   1   3  -4   48.11    1.58
   1  -3   4   49.13    1.67
  -1  -3   4   45.24    1.61
  -1   3  -4   47.94    1.54
  -1  -3   4   50.28    1.69
   1  -3  -4   47.24    1.61
   1  -3  -4   45.15    1.41
   1   3   4   49.62    1.57
   1  -3  -4   44.10    1.45
   1  -4   4   49.79    1.77
  -1  -4  -4   47.46    1.71
  -1  -4  -4   48.75    1.50
   1  -4   4   47.86    1.74
   1   4  -4   50.01    1.68
  -1   4   4   46.58    1.66
   1  -4  -4   47.81    1.71
   1   4   4   47.32    1.67
  -1  -4   4   47.26    1.78
  -1   4  -4   48.86    1.65
  -1  -4   4   48.10    1.69
   1  -5   4  159.79    5.03
  -1   5   4  158.79    4.99
   1   5  -4  164.89    5.01
   1  -5   4  165.87    5.07
  -1  -5  -4  163.39    5.04
  -1   5  -4  167.38    4.98
  -1  -5   4  161.76    5.01
  -1  -5   4  159.51    5.06
   1  -5  -4  160.64    5.05
   1   5   4  161.98    5.00
   1  -6   4   21.97    1.24
  -1  -6  -4   20.58    1.29
   1   6  -4   21.02    1.14
  -1   6   4   20.67    1.13
  -1  -6   4   20.48    1.18
   1  -6  -4   18.94    1.15
   1   6   4   19.21    1.18
  -1   6  -4   21.71    1.12
  -1  -6   4   19.66    1.27
   1  -7   4   49.97    2.09
   1   7  -4   47.69    1.97
  -1   7   4   47.99    1.96
  -1  -7  -4   46.55    2.00
   1   7   4   47.98    1.96
  -1  -7   4   47.26    2.06
  -1   7  -4   50.25    1.97
   1  -7  -4   43.94    2.00
  -1   7  -4   48.63    1.87
  -1   8   4    9.18    0.99
   1  -8   4    6.64    1.03
  -1  -8  -4    8.43    1.01
   1   8  -4    8.06    1.00
  -1   8  -4    7.65    0.99
   1  -8  -4    7.67    1.01
  -1  -8   4    6.53    1.04
   1   8   4    9.14    1.06
   1  -9   4   11.88    1.41
  -1   9   4   13.08    1.30
   1   9  -4   12.27    1.36
  -1  -9  -4   13.32    2.01
   1   9   4   11.95    1.28
  -1   9  -4   13.63    1.31
   1  -9  -4   11.36    1.57
  -1  -9   4   12.80    1.39
   1   0  -5   -0.05    0.22
  -1   0  -5    0.17    0.22
  -1   0   5   -0.01    0.19
  -1   0  -5   -0.06    0.40
   1   0  -5   -0.04    0.20
  -1   0  -5    0.18    0.14
   1   0   5    0.02    0.12
  -1   0   5   -0.03    0.16
   1   0  -5    0.02    0.36
  -1  -1  -5   31.71    1.27
   1   1  -5   34.82    1.14
  -1   1   5   35.25    1.11
   1  -1   5   36.55    1.28
  -1  -1  -5   33.34    1.16
   1   1  -5   32.89    1.25
  -1   1   5   34.84    1.22
  -1  -1  -5   33.78    1.11
   1   1  -5   33.36    1.15
  -1   1   5   33.08    1.28
   1  -1  -5   31.09    1.23
  -1  -1   5   34.38    1.14
   1   1   5   34.82    1.08
   1  -1  -5   31.49    1.13
  -1  -1   5   33.94    1.27
  -1   1  -5   35.28    1.07
   1  -1  -5   32.40    1.17
   1   1   5   34.37    1.20
  -1   1  -5   34.71    1.07
  -1   1  -5   32.36    1.24
   1   2  -5   19.79    0.84
  -1   2   5   20.43    0.92
  -1  -2  -5   20.89    0.91
   1   2  -5   20.37    0.81
   1  -2   5   20.07    0.94
   1  -2   5   20.75    0.77
  -1   2   5   20.98    0.77
  -1  -2  -5   19.98    0.84
   1  -2   5   20.95    0.91
  -1  -2  -5   21.98    0.77
   1  -2  -5   20.13    0.86
  -1  -2   5   21.48    0.81
   1   2   5   19.33    0.76
   1   2   5   19.94    0.90
  -1   2  -5   20.90    0.75
  -1  -2   5   20.03    0.96
  -1  -2   5   20.61    0.83
  -1  -3  -5   32.35    1.08
   1   3  -5   30.72    1.25
   1   3  -5   34.14    1.20
  -1   3   5   31.96    1.16
   1  -3   5   32.59    1.31
   1  -3   5   32.52    1.33
  -1  -3  -5   31.85    1.30
   1   3   5   31.88    1.17
   1  -3  -5   32.16    1.23
  -1  -3   5   33.42    1.34
   1   3   5   35.48    1.35
  -1   3  -5   32.23    1.15
   1  -3  -5   30.82    1.05
  -1  -3   5   35.07    1.24
   1  -3  -5   30.78    1.12
   1  -4   5   39.05    1.63
  -1  -4  -5   39.77    1.30
  -1  -4  -5   39.81    1.50
  -1   4   5   39.75    1.45
   1  -4   5   38.93    1.57
   1   4  -5   40.96    1.47
   1   4   5   39.74    1.44
   1  -4  -5   40.09    1.50
  -1   4  -5   41.50    1.45
  -1  -4   5   40.90    1.62
  -1  -4   5   38.22    1.55
   1  -5   5    1.44    0.58
  -1   5   5    1.70    0.48
   1   5  -5    1.57    0.51
  -1  -5  -5    0.90    0.41
   1  -5   5    1.90    0.58
  -1  -5   5    1.59    0.53
   1   5   5    1.19    0.47
  -1   5  -5    1.06    0.48
   1  -5  -5    1.16    0.44
  -1  -5   5    1.21    0.60
  -1  -6  -5   35.18    1.56
   1  -6   5   38.00    1.71
   1   6  -5   35.07    1.52
  -1   6   5   36.12    1.51
  -1  -6   5   33.51    1.67
   1  -6  -5   35.29    1.56
  -1  -6   5   28.65    1.57
   1   6   5   32.86    1.51
  -1   6  -5   38.39    1.52
  -1   6  -5   37.11    1.50
   1  -7   5   27.82    1.67
  -1   7   5   29.74    1.48
   1   7  -5   29.46    1.56
  -1  -7  -5   30.29    1.55
  -1   7  -5   27.94    1.49
   1   7   5   31.64    1.55
  -1  -7   5   27.70    1.70
   1  -7  -5   26.87    1.54
  -1   7  -5   28.61    1.47
  -1  -7   5   24.80    1.81
   1  -8   5    7.56    1.15
  -1   8   5    7.90    1.01
  -1  -8  -5    9.00    1.07
   1   8  -5    8.98    1.07
  -1  -8   5    7.19    1.08
   1  -8  -5   10.50    1.13
   1   8   5    7.55    1.04
  -1   8  -5   11.70    1.12
  -1  -9  -5   17.86    1.53
   1  -9   5   16.38    1.61
  -1   9   5   15.69    1.38
   1   9  -5   19.07    1.53
  -1  -9   5   13.61    1.86
   1   9   5   14.75    1.40
  -1   9  -5   17.59    1.43
   1  -9  -5   15.96    1.48
   1   0   6   -0.23    0.23
   1   0   6   -0.02    0.16
  -1   0   6   -0.04    0.32
   1   0  -6    0.16    0.27
  -1   0   6   -0.03    0.20
   1   0  -6   -0.01    0.25
  -1   0   6   -0.21    0.25
  -1   0  -6    0.02    0.18
  -1   0  -6   -0.06    0.26
  -1  -1  -6   30.98    1.13
   1  -1   6   31.25    1.15
  -1  -1  -6   28.22    1.04
   1   1  -6   28.31    1.15
   1  -1   6   29.57    1.23
   1   1  -6   31.65    1.09
   1   1  -6   30.09    1.09
  -1   1   6   31.97    1.05
  -1   1   6   29.51    1.18
  -1   1   6   30.45    1.16
  -1  -1   6   31.89    1.26
   1  -1  -6   30.27    1.16
   1   1   6   30.82    1.17
  -1   1  -6   31.12    0.99
  -1  -1   6   30.94    1.16
   1   1   6   32.13    1.02
  -1   1  -6   30.46    1.00
  -1   2   6    7.74    0.47
   1   2  -6    7.80    0.51
   1  -2   6    8.50    0.61
   1   2  -6    8.12    0.59
   1  -2   6    8.23    0.65
  -1  -2  -6    7.91    0.66
  -1   2   6    8.61    0.63
   1  -2   6    7.48    0.49
  -1   2  -6    7.72    0.46
  -1  -2   6    7.32    0.63
   1   2   6    8.48    0.46
  -1  -2   6    7.82    0.56
  -1  -2   6    7.87    0.59
   1  -2  -6    6.93    0.59
   1   2   6    8.40    0.65
   1  -3   6  178.72    5.44
  -1  -3  -6  179.54    5.40
   1  -3   6  179.84    5.62
   1  -3   6  180.55    5.58
  -1   3   6  181.65    5.46
  -1  -3  -6  178.82    5.49
   1   3  -6  183.03    5.48
  -1  -3   6  183.60    5.64
   1   3   6  184.58    5.45
  -1  -3   6  185.52    5.50
   1   3   6  185.82    5.63
   1  -3  -6  190.47    5.56
   1  -3  -6  179.62    5.38
  -1  -4  -6   20.84    1.03
  -1  -4  -6   22.31    0.82
   1   4  -6   20.52    1.00
  -1   4   6   19.88    0.93
   1  -4   6   21.52    1.17
   1  -4   6   20.78    1.15
   1  -4  -6   20.34    0.75
  -1  -4   6   21.77    1.19
  -1  -4   6   21.55    1.08
  -1   4  -6   21.43    0.96
   1   4   6   21.86    0.98
   1  -4  -6   20.79    1.01
   1  -5   6   86.41    3.01
  -1   5   6   84.84    2.86
   1   5  -6   88.28    2.89
   1  -5   6   80.91    3.04
   1   5   6   85.48    2.87
  -1   5  -6   88.47    2.84
  -1  -5   6   86.89    3.06
   1  -5  -6   93.98    3.26
  -1  -5   6   89.95    3.00
   1   6  -6    0.16    0.61
   1  -6   6    0.27    0.88
  -1  -6  -6    0.03    0.49
  -1   6   6    0.33    0.55
   1   6   6    0.27    0.55
  -1   6  -6    0.06    0.58
  -1  -6   6    1.24    0.73
  -1  -6   6   -0.01    0.71
  -1   6  -6    0.64    0.58
   1  -6  -6    0.22    0.53
  -1   7   6   61.99    2.37
  -1  -7  -6   60.93    2.48
   1  -7   6   61.22    2.67
   1   7  -6   62.85    2.43
   1  -7  -6   61.64    2.49
  -1  -7   6   60.44    2.59
   1   7   6   62.33    2.40
  -1   7  -6   66.69    2.46
  -1   7  -6   66.46    2.39
  -1  -7   6   60.35    2.60
  -1  -8  -6   10.06    1.15
   1   8  -6   10.51    1.14
   1  -8   6    6.13    1.27
  -1   8   6    7.13    1.00
   1  -8  -6    8.40    1.08
   1   8   6    8.90    1.07
  -1  -8   6    7.67    1.27
  -1   8  -6    7.64    1.06
   1   0  -7   -0.01    0.25
  -1   0   7    0.19    0.39
  -1   0  -7   -0.10    0.28
  -1   0  -7   -0.03    0.21
  -1   0   7   -0.02    0.28
   1   0   7    0.11    0.31
  -1   0  -7   -0.09    0.31
   1  -1   7    1.03    0.34
  -1   1   7    1.32    0.41
  -1  -1  -7    1.68    0.35
  -1   1   7    1.09    0.37
  -1  -1  -7    1.04    0.33
   1   1  -7    1.19    0.30
  -1   1   7    2.16    0.28
  -1   1  -7    1.30    0.24
  -1   1  -7    1.12    0.36
   1   1   7    1.29    0.38
  -1  -1   7    1.17    0.46
   1   1   7    1.66    0.24
  -1  -1   7    1.51    0.32
  -1   1  -7    1.44    0.24
   1   2  -7    9.93    0.62
  -1   2   7   10.16    0.77
  -1  -2  -7   10.47    0.63
   1  -2   7   10.33    0.70
   1  -2   7   11.16    0.84
  -1   2   7   11.10    0.58
   1  -2  -7    9.57    0.62
  -1   2  -7    9.18    0.54
  -1  -2   7    9.94    0.78
  -1  -2   7   10.46    0.63
   1   2   7   10.46    0.76
   1   2   7    9.64    0.54
  -1   2  -7    9.07    0.59
   1  -3   7   79.21    2.59
   1  -3   7   72.93    2.67
   1   3  -7   77.01    2.48
  -1   3   7   77.79    2.45
  -1  -3  -7   76.53    2.41
   1  -3  -7   78.22    2.57
   1  -3  -7   72.45    2.47
   1   3   7   78.44    2.45
   1   3   7   75.90    2.66
  -1  -3   7   79.53    2.51
  -1   3  -7   76.11    2.42
  -1  -3   7   77.30    2.69
   1  -4   7    5.36    0.67
  -1  -4  -7    7.77    0.70
  -1   4   7    5.00    0.51
   1   4  -7    5.17    0.58
   1  -4   7    4.42    0.69
  -1  -4   7    5.44    0.63
   1  -4  -7    5.18    0.39
   1  -4  -7    4.60    0.56
  -1  -4   7    3.85    0.72
   1   4   7    6.18    0.56
  -1   4  -7    5.59    0.55
  -1   5   7   26.24    1.35
   1   5  -7   25.48    1.27
   1  -5   7   27.16    1.46
  -1  -5  -7   30.33    1.35
   1  -5  -7   25.96    1.33
  -1  -5   7   29.38    1.38
  -1   5  -7   29.47    1.27
   1   5   7   27.49    1.25
  -1  -5   7   27.69    1.54
   1  -6   7    2.85    0.84
  -1   6   7    4.13    0.67
   1   6  -7    3.77    0.87
  -1  -6  -7    3.60    0.66
  -1  -6   7    4.23    0.94
   1  -6  -7    3.34    0.67
   1   6   7    2.48    0.65
  -1   6  -7    2.83    0.71
  -1  -6   7    3.85    0.80
  -1   6  -7    4.50    0.72
   1  -7   7   15.15    1.40
   1   7  -7   19.60    1.40
  -1   7   7   17.34    1.22
  -1  -7  -7   20.06    1.43
  -1  -7   7   17.12    1.39
  -1   7  -7   18.46    1.44
   1  -7  -7   18.58    1.37
  -1  -7   7   16.76    1.44
   1   7   7   17.40    1.33
  -1   7  -7   19.42    1.33
  -1  -8  -7    5.69    1.11
   1   8  -7    5.17    1.06
   1  -8   7    4.62    1.27
  -1   8   7    5.45    1.01
   1   8   7    5.85    1.00
   1  -8  -7    7.81    1.73
  -1   8  -7    4.95    1.03
  -1   0   8   -0.18    0.44
   1   0  -8   -0.05    0.29
  -1   0  -8    0.02    0.24
  -1   0  -8    0.22    0.32
   1   0   8   -0.32    0.34
  -1   0   8   -0.07    0.34
  -1   0  -8    0.09    0.37
   1   1  -8   59.97    1.94
  -1   1   8   56.00    2.04
  -1  -1  -8   59.69    2.02
   1  -1   8   55.67    2.01
  -1   1   8   60.77    1.92
  -1   1   8   58.30    2.09
  -1  -1   8   55.38    2.14
  -1   1  -8   60.01    1.86
   1   1   8   59.85    1.86
  -1   1  -8   59.23    2.07
   1   1   8   56.94    2.04
  -1  -1   8   59.00    1.97
  -1   2   8   13.23    0.70
  -1  -2  -8   13.65    0.78
   1   2  -8   13.64    0.74
   1  -2   8   14.39    0.85
  -1   2   8   13.71    0.96
  -1   2  -8   13.46    0.68
   1   2   8   13.05    0.96
  -1  -2   8   14.29    1.00
  -1  -2   8   14.01    0.77
   1  -2  -8   13.88    0.80
   1   2   8   14.48    0.68
  -1   3   8   66.50    2.16
   1  -3   8   67.46    2.45
  -1  -3  -8   62.24    2.13
   1   3  -8   64.65    2.19
   1  -3   8   65.48    2.28
  -1   3  -8   65.94    2.12
   1   3   8   67.68    2.14
  -1  -3   8   64.12    2.20
   1  -3  -8   66.03    2.13
  -1  -3   8   64.84    2.45
   1   3   8   62.44    2.40
   1   4  -8   12.21    0.87
  -1  -4  -8    9.84    0.81
  -1  -4  -8   11.34    0.71
   1  -4   8   12.85    1.01
   1  -4   8   12.85    0.97
  -1   4   8   11.47    0.75
  -1   4  -8   11.47    0.79
  -1  -4   8    8.83    1.08
  -1  -4   8   12.87    0.86
   1   4   8   10.51    0.76
   1  -5   8   87.14    3.06
  -1  -5  -8   85.90    3.01
   1   5  -8   87.12    2.91
  -1   5   8   82.51    2.87
   1   5   8   82.51    2.91
   1  -5  -8   84.98    3.00
  -1   5  -8   86.57    2.86
  -1  -5   8   90.10    2.98
  -1   5  -8   88.37    3.02
  -1  -5   8   88.74    3.21
   1   6  -8   14.75    1.05
  -1  -6  -8   15.91    1.16
  -1   6   8   12.77    0.96
   1  -6   8   12.06    1.15
  -1   6  -8   15.93    1.04
   1  -6  -8   12.33    1.06
   1   6   8   13.30    0.98
  -1  -6   8   11.69    1.22
  -1   6  -8   13.92    1.10
  -1  -6   8   15.49    1.13
   1  -7   8   58.16    2.63
  -1   7   8   57.26    2.31
   1   7  -8   61.50    2.41
  -1  -7  -8   57.92    2.49
  -1  -7   8   57.61    2.72
  -1  -7   8   65.92    2.97
   1   7   8   58.66    2.37
  -1   7  -8   63.90    2.51
   1  -7  -8   56.18    2.50
  -1   8   8    7.48    1.07
   1   8  -8    8.43    1.21
  -1  -8  -8    6.94    1.13
   1  -8   8    4.86    1.29
   1  -8  -8    7.54    1.18
  -1   0   9    0.06    0.50
  -1   0  -9   -0.13    0.48
  -1   0  -9   -0.09    0.42
  -1   0   9   -0.12    0.42
   1   0  -9   -0.02    0.34
   1   0   9   -0.20    0.40
  -1   1   9   24.77    1.25
  -1   1   9   24.65    1.21
  -1   1   9   23.91    1.01
   1  -1   9   24.93    1.17
  -1  -1  -9   24.18    1.14
   1   1  -9   24.68    1.04
  -1   1  -9   23.60    0.94
  -1   1  -9   22.73    1.20
  -1  -1   9   25.49    1.10
  -1  -1   9   22.35    1.28
   1   1   9   25.64    1.21
   1   1   9   24.05    0.95
   1   2  -9    9.49    0.71
  -1  -2  -9   10.44    0.71
  -1   2   9    8.80    0.66
   1  -2   9    9.88    0.81
  -1   2   9    9.13    0.83
  -1  -2   9    9.24    0.75
   1   2   9    9.53    0.62
   1  -2  -9    9.66    0.71
   1   2   9   10.56    0.84
  -1  -2   9   10.93    0.95
  -1   2  -9   10.47    0.83
  -1   3   9    1.55    0.42
   1  -3   9    1.49    0.51
  -1   3   9    1.21    0.65
   1   3  -9    1.45    0.47
  -1  -3  -9    1.05    0.43
  -1  -3   9    1.96    0.77
   1   3   9    1.55    0.41
  -1  -3   9    1.83    0.48
  -1   3  -9    1.11    0.69
  -1   3  -9    1.36    0.42
   1  -3  -9    1.01    0.43
   1   4  -9   28.15    1.31
  -1  -4  -9   29.75    1.40
   1  -4   9   28.85    1.41
  -1   4   9   28.12    1.27
   1  -4  -9   28.83    1.43
  -1  -4   9   28.99    1.66
  -1   4  -9   30.02    1.54
   1   4   9   28.91    1.63
   1   4   9   29.28    1.24
  -1   4  -9   29.59    1.26
  -1  -4   9   31.14    1.35
  -1   5   9   20.84    1.15
   1  -5   9   20.86    1.34
  -1  -5  -9   20.82    1.31
   1   5  -9   23.39    1.26
   1   5   9   22.35    1.17
   1  -5  -9   22.31    1.32
  -1  -5   9   23.42    1.28
  -1   5  -9   20.13    1.43
  -1  -5   9   19.52    1.57
  -1   6   9    2.38    0.67
  -1  -6  -9    2.71    0.75
   1  -6   9    2.35    0.87
   1   6  -9    3.34    0.80
  -1  -6   9    3.38    1.06
   1  -6  -9    2.25    0.73
   1   6   9    2.43    0.70
  -1   6  -9    1.82    0.85
  -1  -6   9    3.32    0.80
  -1   7   9    7.34    0.95
   1  -7   9    7.42    1.21
  -1  -7  -9    5.98    1.01
   1   7  -9    8.81    1.48
   1  -7  -9    8.05    1.09
  -1   7  -9   10.53    1.18
  -1  -7   9    5.76    1.26
   1   7   9    7.20    0.97
   1   0 -10    0.00    0.39
   1   0  10    0.12    0.50
  -1   0 -10    0.08    0.50
  -1   0  10   -0.11    0.59
  -1   0 -10    0.15    0.35
  -1   0  10    0.09    0.48
  -1   1  10    0.25    0.56
  -1  -1 -10    0.99    0.51
   1   1 -10    0.35    0.42
   1  -1  10    0.65    0.50
  -1   1  10    0.66    0.41
   1   1  10    0.28    0.38
   1   1  10    0.45    0.54
   1  -1 -10    0.61    0.51
  -1   1 -10    0.53    0.68
  -1   1 -10    0.56    0.39
  -1  -1  10    0.73    0.74
  -1  -1  10    0.42    0.47
  -1   2  10    6.18    0.58
  -1   2  10    6.48    0.82
   1  -2  10    7.46    0.73
   1   2 -10    6.38    0.62
  -1  -2 -10    6.01    0.66
  -1   2 -10    6.86    0.79
   1   2  10    7.91    0.57
   1  -2 -10    6.98    0.69
   1   2  10    5.75    0.89
  -1  -2  10    7.08    0.66
  -1  -2  10    6.25    0.86
   1  -3  10   61.59    2.27
   1   3 -10   60.20    2.15
  -1   3  10   61.73    2.48
  -1   3  10   60.87    2.13
  -1  -3 -10   61.03    2.14
  -1   3 -10   62.94    2.39
   1   3  10   58.98    2.43
   1   3  10   63.92    2.11
  -1  -3  10   60.53    2.49
  -1  -3  10   64.76    2.22
   1  -3 -10   62.03    2.16
  -1   4  10    2.90    0.57
   1   4 -10    2.09    0.60
   1  -4  10    2.85    0.72
  -1  -4  10    2.51    0.88
  -1   4 -10    3.38    0.79
   1   4  10    2.54    0.55
  -1  -4  10    2.38    0.60
   1  -4 -10    2.69    0.67
   1   4  10    2.74    0.86
   1   5 -10   51.79    2.44
  -1   5  10   53.16    2.04
  -1  -5 -10   53.97    2.27
   1  -5  10   56.64    2.24
  -1   5 -10   53.53    2.36
  -1  -5  10   52.80    2.51
   1  -5 -10   57.31    2.29
  -1  -5  10   58.10    2.30
   1   5  10   53.29    2.04
   1  -6  10   13.79    1.23
  -1  -6 -10   14.44    1.24
  -1   6  10   10.38    0.98
  -1  -6  10   12.10    1.42
   1  -6 -10   14.26    1.24
   1   6  10   13.76    1.07
  -1   6 -10   13.69    1.26
  -1  -7 -10   17.77    1.45
  -1   7  10   22.53    1.52
   1  -7  10   21.96    1.62
  -1   7 -10   23.80    1.86
   1   7  10   21.12    1.51
   1  -7 -10   18.66    1.53
   1   0  11   -0.05    0.62
  -1   0  11   -0.08    0.57
   1   0 -11    0.02    0.46
  -1   0 -11    0.25    0.58
   1   1 -11    3.79    0.58
  -1   1  11    3.68    0.85
   1   1  11    2.93    0.72
  -1   1 -11    2.77    0.69
   1  -1 -11    4.57    0.73
  -1  -1  11    4.07    0.84
  -1  -1  11    3.06    0.64
  -1   2  11   22.87    1.13
  -1  -2 -11   24.03    1.26
   1   2 -11   22.80    1.16
  -1   2  11   22.67    1.48
  -1  -2  11   25.08    1.27
   1   2  11   23.75    1.09
   1   2  11   22.82    1.49
   1  -2 -11   23.77    1.30
  -1  -2  11   22.89    1.60
  -1   2 -11   25.04    1.47
  -1   3  11   28.84    1.73
   1  -3  11   28.73    1.45
  -1  -3 -11   26.68    1.32
  -1   3  11   24.37    1.47
  -1   3 -11   28.98    1.61
   1  -3 -11   26.11    1.34
  -1  -3  11   26.83    1.38
   1   3  11   28.18    1.26
  -1  -3  11   27.03    1.71
   1   3  11   29.98    1.74
   1  -4  11   19.79    1.31
  -1   4  11   20.14    1.15
   1   4  11   18.56    1.45
   1   4  11   17.98    1.12
  -1  -4  11   19.75    1.40
  -1  -4  11   18.97    1.50
  -1   4 -11   20.83    1.52
   1  -4 -11   19.81    1.36
   1  -5  11    4.28    0.89
  -1   5  11    3.66    0.74
  -1  -5 -11    4.24    0.91
   1  -5 -11    4.50    0.86
  -1  -5  11    3.35    1.13
   1   5  11    4.67    0.77
  -1   5 -11    4.02    0.97
  -1  -6 -11   37.41    2.46
   1  -6  11   35.98    1.96
  -1   6  11   33.07    1.74
   1   6  11   35.21    1.75
   1  -6 -11   34.09    2.03
  -1  -6  11   34.79    2.36
  -1   6 -11   34.28    2.09
  -1   0  12    0.06    0.70
   1   0  12    0.23    0.67
  -1   0 -12   -0.23    0.65
   1   0 -12   -0.22    0.67
  -1  -1 -12    3.20    0.72
   1   1 -12    3.47    0.81
   1  -1  12    2.18    0.72
  -1   1  12    2.52    0.83
   1  -1 -12    2.49    0.63
   1   1  12    2.56    0.81
  -1   1 -12    3.03    0.78
   1  -1 -12    4.08    0.81
  -1  -1  12    2.93    0.94
  -1  -2 -12    1.93    0.67
  -1   2  12    1.23    0.87
  -1   2  12    0.97    0.57
   1  -2  12    2.03    0.73
  -1  -2  12    1.68    0.92
   1   2  12    1.72    0.85
   1  -2 -12    2.32    0.73
  -1   2 -12    1.68    0.78
  -1   3  12    3.41    1.01
  -1  -3 -12    5.20    0.89
  -1   3  12    5.34    0.70
   1  -3  12    4.15    0.84
  -1  -3  12    4.71    0.81
   1   3  12    4.08    1.05
  -1   3 -12    6.41    1.01
  -1  -3  12    3.24    1.01
   1  -4  12   24.00    1.54
  -1   4  12   22.64    1.32
   1   4  12   22.55    1.43
  -1  -4  12   18.16    1.62
   1  -4 -12   21.00    1.52
   1   4  12   20.67    1.63
  -1   4 -12   20.63    1.66
   1  -5  12   20.10    1.62
  -1  -5 -12   20.69    1.59
  -1   5  12   19.10    1.37
  -1  -5  12   20.15    1.75
   1   5  12   20.77    1.40
   1  -5 -12   20.82    1.61
  -1   5 -12   22.78    1.60
  -1   6  12   12.51    1.18
  -1  -6 -12   12.95    1.35
   1   6 -12   16.51    1.62
   1  -6 -12   12.20    1.36
   1   6  12   15.51    1.23
  -1   6 -12   12.85    1.45
  -1   0  13   -0.34    0.82
  -1   0 -13    0.02    0.74
   1   0  13    0.43    0.79
   1   0 -13   -0.19    0.78
  -1  -1 -13    0.49    0.74
   1  -1  13    1.22    0.79
  -1   1  13    1.24    0.91
   1   1 -13    1.17    0.87
   1   1  13    0.90    0.87
  -1  -1  13    0.98    0.80
   1  -1 -13    1.62    0.82
  -1   1 -13    1.38    0.81
  -1  -2 -13    4.52    0.86
   1   2 -13    4.11    1.02
  -1   2  13    3.63    1.06
   1  -2  13    4.01    0.88
  -1   2 -13    5.18    1.00
   1  -2 -13    4.84    0.87
   1   2  13    3.64    1.05
  -1  -2  13    4.68    0.91
   1  -3  13   12.18    1.16
   1   3 -13   13.98    1.37
  -1   3  13   13.20    1.67
  -1   3 -13   13.09    1.30
   1   3  13   12.43    1.42
   1  -4  13   40.16    2.03
  -1   4  13   34.04    1.71
   1   4 -13   35.37    2.26
   1  -4 -13   36.00    2.01
  -1   4 -13   36.80    2.27
  -1  -5 -13   11.34    1.34
  -1   5  13   11.39    1.10
   1   5 -13   11.53    1.50
   1  -5 -13    9.30    1.23
  -1   5 -13   12.73    1.44
  -1   0 -14   -0.32    0.85
   1   0 -14    0.25    0.93
  -1   0  14   -0.20    0.98
   1   0  14   -0.48    0.95
   1   1 -14    1.10    0.99
   1  -1  14    0.98    0.93
  -1  -1 -14    1.22    0.88
  -1   1  14    1.03    1.07
   1   1  14    0.59    1.03
  -1   1 -14    0.65    0.91
  -1  -1  14    0.94    1.01
   1  -1 -14    1.16    0.89
  -1   2  14    2.14    1.17
   1   2 -14    2.34    1.10
   1  -2  14    2.35    0.98
  -1  -2 -14    1.96    0.90
   1  -2 -14    1.50    0.92
  -1   2 -14    2.59    1.03
   1   2  14    1.80    1.16
   1   3 -14    3.43    1.45
   1  -3  14    2.66    1.02
   1   3  14    1.47    1.23
   1  -3 -14    2.62    1.00
  -1   3 -14    1.59    1.15
   1   4 -14    4.07    1.32
  -1  -4 -14    2.36    1.07
   1  -4 -14    4.61    1.21
  -1   4 -14    3.75    1.21
   1   0  15   -0.20    1.11
  -1   0 -15   -0.05    0.98
  -1   0  15    0.05    1.21
   1   0 -15    0.11    1.04
  -1  -1 -15    0.14    0.99
   1  -1  15    0.34    1.06
  -1   1  15    0.98    1.26
   1   1 -15    0.44    1.43
   1  -1 -15    0.62    1.04
  -1   1 -15    0.40    1.16
   1   1  15   -0.28    1.20
   1   2 -15   13.60    1.53
  -1  -2 -15   10.99    1.28
   1  -2  15   10.78    1.37
  -1   2  15   10.04    1.61
   1   2  15   11.31    2.47
  -1   2 -15   12.32    1.42
   2   0   0  157.16    4.55
   2   0   0  157.55    4.56
   2   0   0  154.16    4.55
   2   0   0  156.78    4.57
  -2   1   0    1.35    0.14
   2  -1   0    1.02    0.14
   2   1   0    0.84    0.11
  -2  -1   0    0.87    0.15
   2   1   0    1.18    0.13
   2  -1   0    0.90    0.11
   2   1   0    1.21    0.16
  -2  -1   0    1.11    0.11
  -2   1   0    1.13    0.11
  -2   1   0    0.92    0.11
   2  -1   0    1.07    0.11
  -2  -1   0    0.99    0.13
  -2  -2   0  218.19    6.42
  -2  -2   0  220.62    6.41
   2  -2   0  218.77    6.44
  -2   2   0  218.32    6.36
   2  -2   0  217.13    6.37
  -2   2   0  223.12    6.42
   2   2   0  225.02    6.44
   2  -2   0  218.49    6.42
   2   2   0  222.44    6.41
  -2  -2   0  204.20    6.48
  -2  -2   0  225.25    6.42
  -2   3   0    8.89    0.35
  -2   3   0   11.16    0.81
  -2  -3   0    8.83    0.46
  -2  -3   0    8.31    0.46
   2  -3   0    9.62    0.51
   2   3   0    8.49    0.51
  -2   3   0    8.83    0.43
   2   3   0    7.73    0.46
   2  -3   0    8.55    0.54
  -2   4   0   17.41    0.68
   2  -4   0   17.53    0.82
  -2  -4   0   17.89    0.77
   2   4   0   17.50    0.86
  -2   4   0   17.97    0.62
  -2  -4   0   17.40    0.78
  -2   4   0   18.40    0.79
   2  -5   0    0.06    0.34
  -2   5   0   -0.07    0.37
  -2  -5   0   -0.18    0.31
   2   5   0   -0.25    0.42
   2   5   0   -0.04    0.32
  -2   5   0   -0.04    0.20
  -2   5   0    0.14    0.30
  -2  -5   0   -0.04    0.37
   2  -6   0    4.52    0.63
  -2   6   0    5.20    0.63
  -2  -6   0    4.75    0.58
   2   6   0    4.40    0.64
   2  -7   0    0.62    0.59
  -2   7   0    1.42    0.63
   2   7   0    1.19    0.68
  -2   8   0   27.72    1.59
  -2  -8   0   28.63    1.57
   2  -8   0   27.56    1.65
   2   8   0   26.90    1.69
   2  -9   0    3.64    1.04
  -2   9   0    3.99    1.05
   2   9   0    2.82    1.03
  -2  -9   0    1.95    0.96
   2   0  -1  946.55   27.76
   2   0   1  927.52   28.50
  -2   0  -1  985.57   28.63
  -2   0   1  936.37   27.77
  -2   1   1   95.94    2.66
  -2   1   1   88.97    2.69
  -2  -1  -1   93.01    2.68
   2   1  -1   91.82    2.70
  -2  -1  -1   86.90    2.68
   2   1  -1   89.41    2.70
  -2   1   1   89.25    2.67
   2  -1   1   89.70    2.68
  -2  -1  -1   93.98    2.70
   2   1   1   92.64    2.69
  -2  -1   1   91.18    2.63
  -2   1  -1   85.65    2.71
   2  -1  -1   90.53    2.69
  -2   1  -1   90.15    2.68
  -2  -1   1   90.72    2.70
   2   1   1   90.07    2.69
  -2   1  -1   88.59    2.65
  -2  -1   1   89.97    2.71
   2  -1  -1   90.48    2.66
   2   1   1   92.02    2.68
   2  -1  -1   90.53    2.68
   2   2  -1  382.82   11.41
   2   2  -1  397.13   11.47
  -2  -2  -1  401.02   11.43
   2   2  -1  395.54   11.46
  -2  -2  -1  388.15   11.46
   2  -2   1  403.92   11.49
  -2  -2  -1  391.99   11.47
  -2   2   1  395.73   11.45
   2  -2   1  385.89   11.44
  -2   2  -1  395.36   11.42
   2   2   1  395.06   11.47
   2  -2  -1  396.77   11.48
  -2  -2   1  400.63   11.42
  -2   2  -1  387.94   11.52
  -2   2  -1  400.37   11.44
  -2  -2   1  387.60   11.48
   2  -2  -1  393.36   11.37
   2   3  -1   95.89    2.97
  -2  -3  -1   93.64    2.94
  -2   3   1   97.74    2.95
   2  -3   1   95.14    2.94
   2  -3   1   95.27    2.98
  -2  -3  -1   93.59    2.98
  -2  -3  -1   98.40    2.90
  -2  -3   1   98.53    2.96
   2  -3  -1   97.41    2.99
  -2   3  -1   97.69    2.88
  -2   3  -1   96.51    2.92
  -2  -3   1   99.92    2.93
   2   3   1   96.13    2.97
  -2   3  -1   96.50    2.93
   2   3   1   93.09    2.90
  -2   4   1   45.90    1.54
  -2  -4  -1   44.21    1.46
   2   4  -1   43.62    1.57
   2  -4   1   46.49    1.58
  -2  -4  -1   43.93    1.54
  -2   4  -1   42.59    1.48
  -2   4  -1   44.24    1.42
  -2   4  -1   42.75    1.52
   2   4   1   43.75    1.46
   2  -4  -1   45.93    1.59
   2   4   1   44.73    1.57
  -2  -4   1   47.83    1.53
   2   5  -1   21.56    1.06
  -2   5   1   21.56    1.00
   2  -5   1   22.24    1.05
  -2  -5  -1   22.00    1.00
  -2  -5  -1   19.82    0.92
   2   5   1   21.09    1.05
  -2  -5   1   22.09    1.05
  -2  -5   1   23.25    1.00
   2  -5  -1   21.40    1.03
  -2   5  -1   21.92    0.84
  -2   5  -1   22.97    1.02
  -2   5  -1   24.49    1.11
  -2  -6  -1    8.30    0.72
   2   6  -1    6.45    0.72
   2  -6   1    6.41    0.70
  -2  -6  -1    8.16    0.74
  -2   6   1    6.16    0.69
   2  -6  -1    6.94    0.69
  -2   6  -1    7.09    0.47
  -2  -6   1    5.96    0.61
  -2  -6   1    7.73    0.71
   2   6   1    6.49    0.72
  -2   6  -1    8.33    0.71
   2   7  -1    7.85    0.86
  -2  -7  -1    5.84    0.73
   2  -7   1    5.61    0.77
  -2   7   1    6.78    0.79
  -2  -7   1    7.14    0.77
   2   7   1    5.69    0.80
   2  -7  -1    5.89    0.76
  -2   7  -1    8.33    0.82
  -2   8   1   14.19    1.16
   2  -8   1   12.73    1.17
  -2  -8  -1   14.02    1.14
   2   8  -1   13.35    1.18
   2   8   1   13.21    1.18
   2  -8  -1   13.81    1.19
  -2  -8   1   13.35    1.12
  -2   8  -1   14.12    1.13
   2  -9   1   16.40    1.44
  -2  -9  -1   17.35    1.37
   2   9  -1   18.74    1.48
  -2   9   1   18.54    1.41
  -2  -9   1   15.96    1.37
   2  -9  -1   17.04    1.44
   2   9   1   14.76    1.38
  -2   9  -1   17.63    1.40
   2   0  -2  965.76   27.92
   2   0  -2  954.44   27.95
   2   0   2  962.66   27.89
  -2   0   2 1000.00   27.98
   2   0  -2  970.15   27.97
   2   0  -2  959.27   27.92
   2  -1   2   87.08    2.59
  -2   1   2   88.47    2.64
   2   1  -2   89.12    2.58
   2  -1   2   90.28    2.72
   2  -1   2   84.95    2.65
  -2  -1  -2   89.65    2.63
   2   1  -2   88.12    2.69
   2   1  -2   94.55    2.67
  -2   1   2   89.22    2.63
  -2  -1  -2   85.56    2.65
  -2   1   2   85.02    2.64
  -2  -1  -2   86.55    2.63
  -2  -1   2   89.01    2.66
   2  -1  -2   87.19    2.62
   2   1   2   90.68    2.67
   2  -1  -2   87.60    2.64
  -2   1  -2   91.18    2.58
  -2   1  -2   90.36    2.65
  -2  -1   2   89.33    2.69
   2   1   2   87.03    2.63
   2  -1  -2   88.74    2.64
   2   1   2   88.23    2.62
   2  -2   2  538.74   15.45
   2   2  -2  512.51   15.35
   2   2  -2  538.49   15.43
  -2  -2  -2  515.22   15.48
  -2  -2  -2  540.10   15.38
  -2   2   2  509.06   15.42
  -2  -2  -2  526.66   15.46
  -2   2   2  546.77   15.41
  -2   2  -2  533.15   15.40
   2  -2  -2  517.51   15.40
  -2   2  -2  528.64   15.37
  -2  -2   2  555.68   15.47
  -2  -2   2  543.00   15.36
  -2  -2   2  504.79   15.41
   2  -2  -2  536.07   15.32
   2   2   2  537.19   15.45
  -2   2  -2  526.42   15.44
  -2   2  -2  537.12   15.44
   2   2   2  539.26   15.41
   2  -2  -2  533.22   15.43
   2   3  -2   24.09    0.93
  -2   3   2   25.74    0.90
   2   3  -2   21.64    0.84
  -2  -3  -2   23.86    0.81
  -2  -3  -2   22.83    0.89
   2  -3   2   24.28    0.95
   2  -3   2   22.67    0.89
   2   3  -2   22.70    0.93
   2   3   2   24.28    0.91
   2   3   2   25.72    0.83
  -2  -3   2   25.57    0.86
  -2   3  -2   23.11    0.85
  -2  -3   2   25.51    0.99
  -2   3  -2   22.44    0.86
   2  -3  -2   21.43    0.91
  -2   4   2   31.90    1.17
  -2  -4  -2   31.91    1.18
   2  -4   2   32.48    1.23
   2   4  -2   30.42    1.20
  -2  -4  -2   31.40    1.05
   2   4   2   30.03    1.18
   2   4   2   29.57    1.05
  -2  -4   2   30.95    1.13
   2  -4  -2   31.28    1.20
  -2  -4   2   30.54    1.24
  -2   4  -2   30.76    1.13
  -2   4  -2   29.98    1.09
  -2  -5  -2   41.28    1.44
  -2   5   2   44.93    1.61
  -2  -5  -2   42.25    1.60
   2  -5   2   45.93    1.66
   2   5  -2   42.90    1.65
  -2  -5   2   44.06    1.57
  -2  -5   2   42.17    1.64
  -2   5  -2   45.17    1.59
   2   5   2   44.15    1.63
   2  -5  -2   41.57    1.62
  -2   6   2    0.53    0.49
   2   6  -2    0.34    0.53
  -2  -6  -2    0.81    0.45
   2  -6   2    0.67    0.54
  -2   6  -2    0.36    0.50
  -2  -6   2    0.71    0.58
   2   6   2    0.15    0.53
  -2   6  -2    0.63    0.38
   2  -6  -2    1.14    0.51
  -2  -6   2    0.27    0.47
  -2   7   2    0.65    0.60
   2   7  -2    1.53    0.70
   2  -7   2    0.82    0.65
  -2  -7  -2    0.79    0.57
   2   7   2    1.90    0.70
   2  -7  -2    1.39    0.63
  -2   7  -2    1.50    0.63
  -2  -7   2    1.05    0.61
  -2   8   2    6.96    0.98
   2  -8   2    6.75    0.98
  -2  -8  -2    6.71    0.93
   2   8  -2    7.65    1.03
  -2   8  -2    7.63    0.96
  -2  -8   2    6.63    0.96
   2  -8  -2    6.77    0.92
   2   8   2    6.56    0.96
   2   9  -2   17.53    1.46
  -2  -9  -2   14.20    1.34
   2  -9   2   15.41    1.45
  -2   9   2   15.83    1.35
  -2   9  -2   16.91    1.37
   2  -9  -2   14.91    1.41
  -2  -9   2   14.33    1.38
   2   9   2   18.15    1.79
   2   0  -3  407.53   11.76
  -2   0  -3  395.18   11.75
   2   0  -3  406.97   11.72
   2   0   3  398.97   11.74
  -2   0   3  411.42   11.72
  -2   0  -3  395.90   11.64
  -2   0  -3  405.86   11.73
   2   0  -3  396.28   11.69
   2   0   3  412.38   11.75
  -2   0   3  406.65   11.70
  -2  -1  -3  144.61    4.32
  -2  -1  -3  145.92    4.29
  -2   1   3  150.96    4.34
   2   1  -3  142.09    4.29
   2   1  -3  153.44    4.35
  -2  -1  -3  145.24    4.41
  -2   1   3  151.62    4.32
   2   1  -3  145.54    4.43
   2  -1   3  148.38    4.25
   2  -1   3  147.52    4.39
  -2   1  -3  147.32    4.35
  -2   1  -3  144.14    4.25
   2  -1  -3  147.57    4.35
  -2  -1   3  147.57    4.27
   2  -1  -3  146.21    4.33
   2   1   3  143.43    4.28
   2   1   3  143.75    4.32
   2   1   3  150.25    4.37
  -2  -1   3  145.57    4.34
  -2   1  -3  138.59    4.45
   2  -1  -3  144.95    4.33
  -2   2   3  174.61    5.00
  -2   2   3  176.74    5.13
   2  -2   3  173.05    5.01
   2   2  -3  170.31    5.13
  -2  -2  -3  167.38    5.09
  -2  -2  -3  176.21    5.03
   2  -2   3  173.21    5.16
  -2  -2  -3  167.93    5.10
   2   2  -3  172.68    5.08
   2   2  -3  165.45    5.00
  -2  -2   3  170.91    5.03
   2   2   3  172.05    5.05
  -2   2  -3  167.28    5.10
   2  -2  -3  168.69    5.06
   2  -2  -3  164.67    5.11
   2  -2  -3  167.36    4.99
  -2   2  -3  171.53    5.13
  -2  -2   3  171.32    5.14
  -2  -2   3  167.00    5.07
  -2   2  -3  171.96    5.07
   2   2   3  174.04    5.12
  -2   2  -3  171.45    5.00
   2  -2  -3  172.03    5.08
   2   3  -3   18.07    0.82
   2  -3   3   17.39    0.83
  -2   3   3   17.19    0.72
  -2  -3  -3   18.57    0.67
   2  -3   3   16.53    0.74
   2   3  -3   18.39    0.78
  -2  -3   3   16.27    0.69
  -2  -3   3   17.09    0.84
  -2   3  -3   17.17    0.90
   2   3   3   17.54    0.74
   2   3   3   15.79    0.81
  -2   3  -3   17.56    0.68
   2   3   3   15.35    0.64
   2  -3  -3   17.45    0.76
  -2   4   3   11.89    0.66
  -2  -4  -3   11.97    0.52
   2   4  -3    9.69    0.70
  -2  -4  -3   11.30    0.67
   2  -4   3   12.82    0.77
   2   4   3   11.13    0.53
   2   4   3   12.78    0.73
   2  -4  -3   10.73    0.70
  -2  -4   3   11.23    0.64
  -2   4  -3    9.96    0.62
  -2  -4   3   11.95    0.79
  -2   4  -3   11.09    0.63
  -2   5   3   15.88    0.85
  -2  -5  -3   15.26    0.86
   2  -5   3   17.29    0.97
  -2  -5  -3   14.64    0.67
   2   5  -3   14.98    0.91
  -2  -5   3   15.18    0.86
   2   5   3   14.50    0.90
  -2   5  -3   15.72    0.80
  -2   5  -3   14.72    0.84
   2  -5  -3   15.03    0.88
  -2  -5   3   13.91    1.01
  -2  -6  -3    2.74    0.56
   2   6  -3    4.24    0.66
  -2   6   3    3.50    0.71
   2  -6   3    4.73    0.68
  -2  -6   3    3.73    0.60
  -2   6  -3    4.10    0.61
  -2  -6   3    4.05    0.72
   2  -6  -3    2.75    0.75
  -2   6  -3    4.71    0.53
  -2  -7  -3    2.04    0.62
  -2   7   3    2.82    0.68
   2   7  -3    3.39    0.77
   2  -7   3    1.62    0.69
  -2   7  -3    2.78    0.69
   2   7   3    3.42    0.76
   2  -7  -3    2.95    0.70
  -2  -7   3    2.33    0.66
  -2  -7   3    3.27    0.81
  -2   8   3   13.28    1.12
  -2  -8  -3   11.79    1.12
   2  -8   3   16.32    1.29
   2   8  -3   14.34    1.21
   2  -8  -3   13.40    1.18
  -2   8  -3   13.92    1.12
  -2  -8   3   13.46    1.15
   2   8   3   12.80    1.16
  -2  -9  -3    2.00    0.99
   2  -9   3    1.82    1.10
   2   9  -3    2.47    1.12
   2   9   3    1.12    1.66
  -2   9  -3    0.95    1.01
  -2  -9   3    1.54    1.06
  -2   0  -4  317.49    9.68
  -2   0  -4  333.63    9.67
  -2   0  -4  327.65    9.72
  -2   0   4  336.12    9.63
  -2   0   4  344.94    9.65
   2   0  -4  335.18    9.64
  -2   0   4  326.94    9.71
   2   0  -4  331.74    9.62
  -2   0  -4  317.57    9.55
   2   0  -4  318.29    9.70
   2   0   4  349.86    9.70
   2   1  -4  278.81    8.37
  -2   1   4  283.21    8.27
  -2  -1  -4  287.37    8.29
   2  -1   4  285.61    8.35
   2   1  -4  267.96    8.26
  -2   1   4  290.27    8.32
   2   1  -4  292.44    8.31
  -2   1   4  287.86    8.32
  -2  -1  -4  278.44    8.24
  -2  -1  -4  267.63    8.32
   2  -1  -4  279.20    8.30
   2   1   4  285.06    8.23
  -2   1  -4  286.24    8.40
  -2  -1   4  278.79    8.30
   2   1   4  280.84    8.30
  -2   1  -4  289.57    8.39
   2   1   4  288.66    8.41
   2  -1  -4  279.89    8.27
  -2  -1   4  291.17    8.24
  -2   1  -4  289.22    8.19
  -2   1  -4  279.07    8.37
  -2  -1   4  285.35    8.45
   2  -2   4  115.35    3.47
  -2   2   4  118.85    3.53
  -2  -2  -4  119.55    3.51
  -2  -2  -4  115.42    3.53
   2  -2   4  112.38    3.63
  -2   2   4  119.74    3.51
   2   2  -4  117.68    3.49
   2   2   4  119.17    3.62
  -2  -2   4  115.33    3.65
   2   2   4  117.23    3.51
   2  -2  -4  120.66    3.58
  -2   2  -4  117.13    3.58
  -2  -2   4  114.24    3.55
   2  -2  -4  116.26    3.67
   2  -2  -4  115.31    3.50
  -2  -2   4  120.94    3.51
  -2   2  -4  120.12    3.47
  -2   3   4  186.22    5.52
   2  -3   4  188.98    5.66
   2   3  -4  177.75    5.47
  -2  -3  -4  188.30    5.46
   2   3  -4  186.19    5.55
   2   3   4  178.57    5.45
   2  -3  -4  186.93    5.58
  -2   3  -4  182.59    5.47
   2  -3  -4  181.69    5.39
  -2  -3   4  190.80    5.64
   2   3   4  187.37    5.63
  -2  -3   4  186.36    5.52
   2   3   4  183.45    5.52
  -2   3  -4  187.17    5.55
  -2  -4  -4   28.91    1.03
   2   4  -4   27.75    1.21
  -2  -4  -4   28.54    1.18
   2  -4   4   32.84    1.34
  -2   4   4   32.00    1.17
   2  -4  -4   29.40    1.21
   2   4   4   30.12    1.05
  -2  -4   4   31.13    1.31
   2   4   4   31.47    1.18
  -2   4  -4   28.72    1.16
  -2   4  -4   28.62    1.11
  -2  -4   4   29.36    1.16
  -2  -5  -4   11.07    0.78
   2  -5   4    8.74    0.77
  -2  -5  -4   10.34    0.55
  -2   5   4   10.51    0.76
   2   5  -4   10.26    0.75
   2  -5  -4   10.14    0.80
  -2   5  -4   10.85    0.75
  -2   5  -4    8.70    0.72
  -2  -5   4   10.06    0.80
  -2  -5   4   11.51    0.87
   2   5   4    9.35    0.72
  -2  -6  -4   15.16    1.15
   2  -6   4   16.34    1.17
   2   6  -4   17.44    1.08
  -2   6   4   15.93    1.01
  -2   6  -4   16.80    1.00
   2   6   4   16.75    1.04
  -2  -6   4   14.35    1.04
  -2   6  -4   17.50    0.98
   2  -6  -4   15.96    1.04
  -2  -6   4   16.09    1.23
  -2   7   4    4.07    0.73
   2  -7   4    3.45    0.80
   2   7  -4    2.80    0.76
  -2  -7  -4    5.16    0.74
   2  -7  -4    3.82    0.74
  -2  -7   4    5.11    0.89
  -2  -7   4    3.68    0.77
  -2   7  -4    2.43    0.68
   2   7   4    2.62    0.72
  -2  -8  -4    0.00    0.72
   2   8  -4    0.54    0.86
  -2   8   4   -0.27    0.77
   2  -8   4   -0.66    0.82
   2  -8  -4    0.19    0.77
  -2  -8   4   -0.30    0.85
   2   8   4    0.25    0.81
  -2   8  -4   -0.05    0.78
   2  -9   4    1.38    1.13
   2   9  -4    2.00    1.22
  -2   9   4    1.42    0.93
  -2  -9  -4    0.71    1.09
  -2   9  -4    0.39    1.00
   2  -9  -4    1.46    1.03
   2   9   4    1.60    1.04
  -2   0  -5   86.47    2.56
  -2   0   5   85.29    2.52
   2   0   5   75.03    2.40
  -2   0   5   83.64    2.70
   2   0   5   81.72    2.57
   2   0  -5   82.43    2.50
  -2   0  -5   80.32    2.41
  -2   0   5   80.41    2.50
   2  -1   5  283.28    8.23
   2   1  -5  286.99    8.18
  -2   1   5  282.60    8.21
  -2   1   5  278.67    8.20
   2   1  -5  261.39    8.14
  -2  -1  -5  271.35    8.10
   2   1  -5  253.18    8.15
  -2   1   5  281.39    8.14
  -2  -1  -5  273.09    8.23
   2   1   5  283.80    8.23
   2  -1  -5  281.30    8.20
   2  -1  -5  281.14    8.18
  -2   1  -5  278.58    8.05
  -2  -1   5  279.80    8.28
   2  -1  -5  279.79    8.21
  -2   1  -5  283.21    8.04
   2   1   5  282.83    8.08
  -2  -1   5  275.96    8.12
  -2   1  -5  284.58    8.22
  -2  -2  -5   72.95    2.19
   2  -2   5   70.80    2.33
   2   2  -5   67.92    2.18
  -2   2   5   70.71    2.21
   2  -2   5   70.66    2.13
  -2   2   5   70.48    2.20
  -2  -2  -5   66.86    2.20
   2   2  -5   71.74    2.24
  -2  -2   5   70.58    2.17
  -2   2  -5   72.02    2.13
  -2  -2   5   70.12    2.36
   2   2   5   70.42    2.17
  -2   2  -5   70.42    2.27
   2   2   5   68.98    2.30
   2   2   5   68.98    2.22
   2  -2  -5   71.58    2.25
   2  -2  -5   69.98    2.22
   2  -3   5   87.69    2.69
   2   3  -5   80.75    2.68
  -2   3   5   88.84    2.73
  -2  -3  -5   88.04    2.67
   2  -3   5   86.07    2.88
   2   3  -5   88.29    2.76
  -2  -3   5   88.57    2.73
   2   3   5   85.34    2.70
  -2   3  -5   89.93    2.79
  -2   3  -5   90.53    2.68
  -2  -3   5   87.58    2.89
   2  -3  -5   85.38    2.64
   2   3   5   88.06    2.87
   2   3   5   88.13    2.72
   2  -3  -5   85.69    2.79
   2  -3  -5   86.93    2.62
   2  -4   5  119.58    3.93
   2   4  -5  117.90    3.78
  -2  -4  -5  122.36    3.66
  -2  -4  -5  116.18    3.81
  -2   4   5  126.23    3.76
   2   4   5  120.03    3.76
  -2   4  -5  119.84    3.78
  -2   4  -5  123.89    3.71
  -2  -4   5  120.80    3.79
   2  -4  -5  116.82    3.82
  -2  -4   5  128.54    3.93
  -2  -5  -5    0.32    0.38
   2  -5   5    0.16    0.57
  -2   5   5    0.01    0.42
   2   5  -5    0.03    0.48
  -2   5  -5    0.41    0.43
  -2   5  -5    0.41    0.43
   2  -5  -5    0.80    0.44
  -2  -5   5    0.44    0.48
   2   5   5    0.05    0.45
  -2  -5   5   -0.07    0.58
  -2  -6  -5    0.98    0.51
  -2   6   5    0.99    0.54
  -2  -6   5    0.55    0.57
  -2  -6   5    0.92    0.74
   2   6   5    1.62    0.62
  -2   6  -5    1.49    0.58
  -2   6  -5    1.12    0.53
   2  -6  -5    1.16    0.54
  -2   7   5    7.33    0.83
   2  -7   5    8.85    1.05
  -2  -7  -5    7.67    0.89
   2   7  -5    9.30    0.94
  -2   7  -5    9.67    0.89
   2   7   5    7.03    0.88
  -2  -7   5   10.01    1.10
  -2   7  -5    9.65    0.87
   2  -7  -5    8.14    0.91
  -2  -7   5    8.91    0.95
   2  -8   5    4.21    1.07
  -2  -8  -5    3.92    0.91
  -2   8   5    2.73    0.86
   2   8  -5    2.10    0.94
   2   8   5    2.91    0.94
  -2   8  -5    3.87    0.93
  -2  -8   5    1.83    0.94
   2  -8  -5    3.20    0.92
  -2  -9  -5   10.71    1.34
   2  -9   5    7.13    1.40
  -2   9   5    6.64    1.17
   2   9   5    6.97    1.21
   2  -9  -5    9.03    1.28
  -2   9  -5   11.46    1.30
  -2   0  -6   55.94    1.79
  -2   0   6   51.27    1.85
   2   0  -6   53.71    1.74
  -2   0   6   52.36    1.73
   2   0   6   51.98    1.61
  -2   0  -6   53.07    1.61
   2   0   6   54.35    1.80
  -2  -1  -6   74.24    2.32
   2  -1   6   79.89    2.47
  -2   1   6   78.50    2.45
  -2   1   6   79.14    2.48
  -2  -1  -6   76.09    2.42
   2   1  -6   73.67    2.41
  -2   1   6   79.83    2.38
   2   1  -6   79.28    2.41
  -2   1  -6   76.68    2.46
   2   1   6   73.43    2.47
  -2  -1   6   77.28    2.55
  -2  -1   6   75.94    2.36
  -2   1  -6   72.43    2.25
   2   1   6   77.49    2.30
  -2   1  -6   72.51    2.27
   2   2  -6   37.57    1.29
  -2   2   6   34.24    1.23
   2  -2   6   34.62    1.36
  -2  -2  -6   35.30    1.27
   2  -2   6   35.83    1.16
  -2   2   6   37.00    1.30
  -2  -2  -6   35.12    1.23
   2   2  -6   32.71    1.27
   2   2   6   36.64    1.37
  -2  -2   6   35.97    1.44
  -2   2  -6   37.06    1.35
   2  -2  -6   35.65    1.29
  -2   2  -6   35.69    1.15
  -2  -2   6   35.00    1.21
   2  -2  -6   32.20    1.33
   2   3  -6   73.36    2.51
  -2   3   6   76.18    2.44
   2  -3   6   75.02    2.41
  -2  -3  -6   75.83    2.40
   2  -3   6   76.20    2.61
   2   3  -6   78.80    2.50
   2   3   6   75.92    2.62
  -2  -3   6   73.19    2.63
  -2  -3   6   78.16    2.45
  -2   3  -6   78.92    2.55
   2  -3  -6   81.36    2.55
   2   3   6   76.67    2.43
   2  -3  -6   77.38    2.38
  -2   3  -6   79.88    2.39
   2  -4   6   19.71    1.18
  -2  -4  -6   20.18    0.83
  -2  -4  -6   20.29    1.00
   2   4  -6   18.66    1.00
  -2   4   6   20.15    0.92
   2  -4  -6   19.09    0.70
  -2   4  -6   20.09    1.03
  -2  -4   6   19.88    1.21
   2  -4  -6   20.50    1.02
   2   4   6   19.59    0.94
  -2   4  -6   19.97    0.90
  -2  -4   6   20.15    0.99
   2   5  -6    6.69    0.70
  -2   5   6    7.99    0.75
   2  -5   6    8.27    0.91
   2   5   6    8.23    0.70
  -2  -5   6    9.04    0.92
  -2   5  -6    8.58    0.68
  -2   5  -6    8.16    0.71
  -2  -5   6    9.18    0.78
  -2   6   6    3.06    0.64
   2   6  -6    3.67    0.70
  -2  -6  -6    3.60    0.65
   2  -6   6    3.87    0.88
   2   6   6    4.17    0.70
  -2  -6   6    3.34    0.86
  -2  -6   6    4.17    0.79
   2  -6  -6    3.43    0.65
  -2   6  -6    5.36    0.71
  -2   6  -6    3.87    0.65
  -2   7   6   10.77    0.98
  -2  -7  -6   10.73    1.02
   2   7  -6   13.52    1.10
   2  -7   6   12.44    1.29
   2   7   6   11.46    1.02
  -2   7  -6   13.80    1.04
  -2   7  -6   12.75    1.19
  -2  -7   6   12.70    1.29
   2  -7  -6   11.59    1.08
  -2  -7   6   12.82    1.27
  -2  -8  -6    3.00    0.91
   2  -8   6    1.70    1.15
   2   8  -6    3.07    0.98
  -2   8   6    3.09    0.89
   2   8   6    3.44    0.95
  -2   8  -6    3.50    0.92
   2  -8  -6    4.72    1.03
  -2   0  -7   31.12    1.01
  -2   0  -7   29.75    1.00
  -2   0  -7   32.21    1.21
   2   0  -7   30.65    1.14
   2   0   7   29.97    1.21
  -2   0   7   27.98    1.26
  -2   0   7   30.76    1.16
  -2   1   7   70.09    2.29
   2  -1   7   70.55    2.31
  -2  -1  -7   70.01    2.25
  -2   1   7   71.28    2.20
   2   1  -7   72.52    2.24
  -2   1   7   70.26    2.33
  -2  -1  -7   64.79    2.15
   2   1   7   70.00    2.11
  -2   1  -7   69.20    2.30
  -2   1  -7   65.08    2.06
   2   1   7   68.34    2.31
  -2  -1   7   69.96    2.20
  -2  -1   7   66.93    2.39
  -2   1  -7   67.49    2.08
   2   2  -7   11.12    0.67
  -2   2   7   12.41    0.84
  -2   2   7    8.82    0.56
  -2   2   7   10.60    0.73
   2  -2   7    9.91    0.76
  -2  -2  -7   10.81    0.63
  -2   2  -7   10.32    0.53
  -2   2  -7    9.81    0.52
  -2  -2   7   11.37    0.86
   2   2   7   10.38    0.54
  -2  -2   7   11.04    0.62
   2   2   7   10.07    0.80
  -2   2  -7    9.71    0.73
   2  -3   7   17.97    1.02
  -2   3   7   17.94    0.82
  -2  -3  -7   17.36    0.79
   2   3  -7   17.85    0.91
   2  -3  -7   17.76    0.92
   2   3   7   17.98    0.82
  -2   3  -7   16.87    0.76
  -2  -3   7   17.65    0.82
   2   3   7   17.55    1.06
   2  -3  -7   16.72    0.85
  -2   3  -7   15.05    0.95
  -2  -3   7   17.91    1.10
   2   4  -7   19.94    1.04
   2  -4   7   18.37    1.19
  -2  -4  -7   19.16    0.88
  -2   4   7   19.81    0.96
  -2  -4   7   19.82    0.99
   2  -4  -7   19.08    1.05
  -2  -4   7   20.92    1.30
   2   4   7   20.76    0.96
   2   4   7   19.62    1.23
  -2   4  -7   19.92    1.09
  -2   4  -7   21.16    0.93
  -2  -5  -7    7.75    0.76
   2  -5   7    8.01    0.88
  -2   5   7    9.07    0.73
   2   5  -7    9.44    0.79
  -2   5  -7    8.50    0.70
  -2  -5   7    9.05    1.10
  -2   5  -7    8.44    0.77
   2   5   7    8.90    0.74
  -2  -5   7    9.54    0.79
   2  -5  -7    8.40    0.77
   2  -6   7    2.82    0.87
  -2  -6  -7    2.17    0.63
  -2   6   7    4.38    0.70
   2   6  -7    3.56    0.73
   2   6   7    2.67    0.66
  -2  -6   7    1.89    0.86
  -2   6  -7    3.66    0.71
   2  -6  -7    2.35    0.68
  -2  -6   7    2.64    0.74
  -2   6  -7    3.90    0.68
  -2  -7  -7    0.21    0.69
   2   7  -7    0.58    0.80
  -2   7   7    0.59    0.70
   2  -7   7    0.99    0.95
  -2   7  -7    1.23    0.77
  -2  -7   7    0.28    0.99
   2   7   7    0.45    0.73
   2  -7  -7    0.37    0.70
  -2   7  -7   -0.30    0.74
  -2  -8  -7    1.56    0.95
  -2   8   7    1.47    1.08
   2   8  -7    1.12    1.00
   2  -8   7    0.72    1.20
   2   8   7    1.52    0.95
  -2   0   8   40.88    1.65
   2   0  -8   41.68    1.50
  -2   0  -8   40.52    1.57
  -2   0   8   43.13    1.54
  -2   0  -8   42.70    1.35
   2   0   8   42.14    1.59
  -2   1   8  267.67    7.83
   2  -1   8  271.60    7.94
  -2  -1  -8  266.07    7.89
   2   1  -8  265.42    7.85
  -2   1   8  267.11    7.96
  -2   1   8  261.88    7.91
  -2   1  -8  259.50    7.93
   2   1   8  261.30    7.94
  -2   1  -8  258.78    7.70
   2   1   8  261.43    7.73
  -2  -1   8  259.92    7.83
  -2  -1   8  268.88    8.04
  -2   2   8   30.57    1.18
   2  -2   8   32.04    1.34
   2   2  -8   32.70    1.25
  -2  -2  -8   28.72    1.22
  -2   2   8   31.97    1.34
  -2   2   8   29.54    1.39
   2   2   8   31.25    1.38
   2   2   8   32.55    1.12
  -2  -2   8   32.33    1.48
  -2   2  -8   31.33    1.08
  -2   2  -8   30.11    1.34
  -2  -2   8   30.63    1.19
   2  -3   8   30.56    1.40
   2   3  -8   32.50    1.32
  -2  -3  -8   31.83    1.23
  -2   3   8   30.28    1.24
   2  -3  -8   33.91    1.37
   2  -3  -8   33.05    1.24
   2   3   8   32.92    1.53
  -2  -3   8   31.48    1.24
  -2   3  -8   32.30    1.17
  -2   3  -8   32.76    1.41
  -2  -3   8   30.66    1.56
   2   3   8   30.90    1.21
  -2   4   8    0.92    0.43
   2   4  -8    1.04    0.48
  -2  -4  -8    0.90    0.40
   2  -4   8    0.81    0.55
   2   4   8    0.44    0.62
  -2   4  -8    1.11    0.62
  -2  -4   8    1.01    0.43
   2   4   8    1.07    0.44
  -2   4  -8    1.12    0.43
  -2  -5  -8   21.84    1.28
   2  -5   8   21.53    1.40
   2   5  -8   22.82    1.23
  -2   5   8   22.38    1.12
   2  -5  -8   21.84    1.29
  -2   5  -8   21.95    1.32
  -2  -5   8   24.99    1.58
  -2  -5   8   22.54    1.22
  -2   5  -8   22.40    1.23
  -2  -6  -8   17.28    1.26
   2   6  -8   18.37    1.27
   2  -6   8   19.53    1.38
  -2   6   8   15.34    1.15
   2   6   8   15.50    1.17
  -2  -6   8   15.03    1.36
   2  -6  -8   18.12    1.32
  -2  -6   8   21.24    1.57
  -2   6  -8   17.50    1.31
   2  -7   8    3.25    1.02
  -2   7   8    2.53    0.79
  -2  -7  -8    3.26    0.85
   2   7  -8    3.56    0.91
   2   7   8    2.49    0.81
  -2  -7   8    2.66    1.15
  -2   7  -8    3.31    0.91
   2  -7  -8    3.40    0.87
  -2  -8  -8    5.23    1.16
   2   8  -8    4.98    1.15
  -2   8   8    3.86    0.96
   2  -8   8    2.93    1.22
  -2  -8   8    4.73    1.44
   2  -8  -8    3.07    1.07
  -2   0   9   13.27    0.90
   2   0  -9   12.40    0.79
  -2   0  -9   12.74    0.63
  -2   0   9   14.42    1.06
  -2   0  -9   14.35    0.90
   2   0   9   12.43    0.87
  -2   1   9  118.01    3.84
  -2   1   9  121.15    3.90
   2  -1   9  123.88    3.85
  -2  -1  -9  121.77    3.80
  -2   1   9  122.98    3.73
   2   1  -9  119.86    3.75
   2   1   9  117.03    3.86
  -2   1  -9  120.41    3.86
   2   1   9  117.55    3.64
  -2  -1   9  120.76    3.97
  -2   1  -9  115.44    3.58
  -2  -1   9  120.84    3.76
  -2   2   9   18.59    0.89
   2   2  -9   19.02    0.97
   2  -2   9   17.60    1.07
  -2   2   9   19.16    1.10
  -2  -2  -9   18.85    0.98
  -2   2   9   18.94    1.18
   2   2   9   17.76    1.16
  -2   2  -9   17.74    1.08
   2   2   9   20.20    0.82
  -2  -2   9   18.56    0.94
  -2  -2   9   18.46    1.25
   2  -3   9   61.31    2.17
  -2  -3  -9   55.38    1.97
  -2   3   9   57.52    1.98
   2   3  -9   57.23    2.04
  -2   3  -9   55.93    2.18
  -2  -3   9   58.03    2.33
   2   3   9   55.98    1.92
   2  -3  -9   55.62    1.98
  -2  -3   9   59.83    2.00
   2   3   9   57.12    2.24
   2  -3  -9   55.61    2.11
   2   4  -9    1.45    0.53
  -2   4   9    2.50    0.52
  -2  -4  -9    2.10    0.50
  -2  -4   9    2.05    0.53
  -2   4  -9    2.63    0.66
  -2  -4   9    1.99    0.83
   2   4   9    1.81    0.49
   2  -4  -9    2.92    0.62
   2   4   9    1.22    0.72
  -2  -5  -9   15.72    1.14
  -2   5   9   14.46    1.01
   2   5  -9   16.25    1.16
   2  -5   9   13.10    1.11
  -2  -5   9   15.56    1.06
   2  -5  -9   14.03    1.07
  -2  -5   9   12.79    1.26
   2   5   9   14.18    0.95
  -2   5  -9   15.86    1.23
  -2  -6  -9   13.42    1.12
   2  -6   9   13.90    1.27
   2   6  -9   14.89    1.10
  -2   6   9   14.64    1.10
   2  -6  -9   11.36    1.11
  -2   6  -9   14.49    1.18
   2   6   9   14.33    1.05
  -2  -6   9   12.83    1.37
   2   7  -9    7.36    1.06
   2  -7   9    5.45    1.18
  -2   7   9    6.17    0.92
  -2  -7  -9    5.24    1.00
   2   7   9    5.23    0.95
   2  -7  -9    6.06    1.06
  -2   7  -9    4.80    1.04
  -2  -7   9    6.15    1.35
  -2   0 -10   13.25    0.98
  -2   0  10   16.24    1.16
   2   0 -10   12.08    0.86
   2   0  10   14.48    1.01
  -2   0  10   13.31    0.97
  -2   1  10   44.48    1.83
   2   1 -10   43.47    1.63
  -2  -1 -10   44.10    1.70
  -2   1  10   44.82    1.61
  -2   1  10   43.11    1.79
   2  -1  10   41.52    1.73
  -2   1 -10   41.56    2.32
   2   1  10   42.04    1.92
   2   1  10   39.25    1.46
  -2  -1  10   42.24    1.65
  -2   2  10   24.08    1.40
   2   2 -10   24.27    1.17
  -2  -2 -10   25.11    1.20
   2  -2  10   25.41    1.30
  -2   2  10   24.29    1.10
   2   2  10   23.53    1.02
  -2  -2  10   23.67    1.52
  -2  -2  10   23.89    1.15
   2  -2 -10   23.69    1.23
   2   2  10   23.14    1.35
  -2   2 -10   25.56    1.34
  -2  -3 -10   37.80    1.54
  -2   3  10   38.96    1.52
   2   3 -10   38.36    1.56
   2  -3 -10   39.57    1.56
   2   3  10   40.43    1.46
  -2  -3  10   36.99    1.53
  -2  -3  10   35.91    1.91
   2   3  10   37.27    1.86
  -2   3 -10   37.69    1.73
   2  -3 -10   38.69    1.68
  -2   4  10    2.78    0.57
   2  -4  10    3.43    0.75
   2   4 -10    3.03    0.63
   2  -4 -10    3.29    0.67
  -2   4 -10    2.96    0.75
   2   4  10    1.87    0.85
  -2  -4  10    2.94    0.94
   2   4  10    3.98    0.58
  -2  -4  10    3.74    0.63
  -2   5  10    2.29    0.64
   2  -5  10    1.93    0.78
   2   5 -10    2.93    0.73
  -2  -5 -10    1.62    0.74
   2  -5 -10    2.15    0.74
  -2   5 -10    1.87    0.79
  -2  -5  10    2.01    1.03
   2   5  10    1.96    0.67
  -2   6  10    6.97    0.87
  -2  -6 -10    6.83    0.97
   2  -6  10    4.90    1.00
   2   6 -10    8.35    1.00
  -2   6 -10    6.87    1.05
   2   6  10    7.50    0.89
  -2  -6  10    6.25    1.27
   2  -6 -10    5.25    0.96
  -2  -7 -10    0.33    0.88
   2  -7  10    0.76    1.04
  -2  -7  10    0.55    1.29
   2   7  10   -0.02    0.86
   2  -7 -10    0.57    0.94
  -2   7 -10    0.27    0.99
   2   0  11   74.78    2.68
   2   0 -11   69.02    2.51
  -2   0  11   73.16    2.78
  -2   0 -11   77.87    2.67
  -2   0  11   74.08    2.63
   2  -1  11   40.90    1.80
  -2   1  11   42.02    2.11
  -2   1  11   41.76    1.84
   2   1 -11   39.80    1.65
  -2  -1 -11   41.93    1.77
  -2  -1  11   41.47    1.73
   2  -1 -11   43.65    1.69
   2   1  11   41.93    1.86
  -2   1 -11   45.14    1.84
  -2  -1  11   39.87    1.99
   2   2 -11   19.66    1.14
  -2   2  11   19.02    1.07
   2  -2  11   21.06    1.29
  -2  -2 -11   18.39    1.17
  -2   2  11   20.61    1.44
   2   2  11   19.92    1.41
   2  -2 -11   19.13    1.24
  -2  -2  11   19.65    1.52
  -2   2 -11   21.13    1.34
  -2  -2  11   20.36    1.19
  -2  -3 -11   49.24    1.90
  -2   3  11   46.89    1.84
   2   3 -11   46.92    1.90
   2  -3  11   49.75    2.05
   2  -3 -11   47.87    1.90
   2   3  11   50.22    1.78
   2   3  11   47.34    2.23
  -2   3 -11   50.20    2.12
  -2  -3  11   52.55    1.92
  -2  -3  11   47.92    2.28
   2  -3 -11   47.88    2.03
   2  -4  11   20.62    1.40
  -2   4  11   19.23    1.19
   2   4 -11   19.81    1.43
  -2   4 -11   21.64    1.48
  -2  -4  11   21.86    1.72
   2  -4 -11   20.71    1.39
   2   4  11   18.91    1.49
  -2   5  11    1.21    0.67
  -2  -5 -11    1.25    0.80
   2  -5  11    1.47    0.84
   2  -5 -11    1.27    0.79
  -2   5 -11    1.39    0.85
   2   5  11    1.54    0.71
  -2  -5  11    1.18    1.08
   2  -6  11    4.45    1.05
  -2   6  11    2.30    0.81
  -2   6 -11    2.56    1.05
   2  -6 -11    3.91    1.02
  -2  -6  11    1.65    1.26
   2   6  11    3.41    0.88
  -2   0 -12   40.17    1.79
   2   0  12   34.99    1.80
  -2   0  12   40.96    2.01
   2   0 -12   37.96    1.66
   2  -1  12   45.29    1.94
  -2  -1 -12   43.21    1.89
   2   1 -12   46.58    1.82
  -2   1  12   45.13    2.06
  -2   1 -12   45.52    1.99
  -2  -1  12   42.12    1.91
   2   1  12   43.06    1.99
  -2  -1  12   43.11    2.16
   2  -1 -12   42.17    1.81
   2  -1 -12   45.36    1.94
  -2   2  12   31.83    1.47
  -2   2  12   31.06    1.84
   2  -2  12   30.61    1.67
  -2  -2 -12   31.62    1.57
  -2  -2  12   32.34    1.62
  -2   2 -12   33.90    1.73
   2   2  12   29.47    1.80
   2  -2 -12   31.47    1.63
  -2  -2  12   31.17    1.90
   2  -3  12    6.53    0.95
  -2   3  12    7.04    0.77
  -2  -3 -12    6.42    0.82
  -2   3 -12    5.44    0.93
   2  -3 -12    5.39    0.89
   2   3  12    4.96    1.05
  -2  -3  12    6.05    1.13
  -2   4  12    0.82    0.62
   2  -4  12    2.13    0.85
  -2  -4  12    1.30    1.12
   2  -4 -12    0.95    0.79
   2   4  12    1.03    1.05
  -2   4 -12    1.68    0.89
  -2   5  12   10.74    1.03
  -2  -5 -12   11.86    1.30
   2  -5  12   12.42    1.22
  -2   5 -12   11.78    1.30
   2  -5 -12   10.76    1.21
  -2  -5  12   11.88    1.52
  -2   6  12   -0.04    0.88
   2  -6  12    1.14    1.06
  -2  -6 -12    0.04    0.92
  -2   6 -12    0.20    1.08
  -2  -6  12    0.09    1.35
   2  -6 -12    0.11    0.95
   2   0  13   47.79    2.21
   2   0 -13   50.11    2.25
  -2   0 -13   50.55    2.19
  -2   0  13   48.13    2.23
  -2  -1 -13    6.80    0.91
   2  -1  13    7.16    0.97
  -2   1  13    7.58    1.13
  -2   1 -13    7.20    0.99
   2   1  13    6.17    1.06
  -2  -1  13    6.07    1.15
   2  -1 -13    6.42    0.98
  -2  -1  13    6.11    1.00
  -2   2  13   18.15    1.30
  -2   2  13   18.26    1.51
  -2  -2 -13   17.68    1.38
   2  -2  13   18.35    1.48
  -2   2 -13   19.36    1.39
   2  -2 -13   18.85    1.48
  -2  -2  13   19.62    1.60
   2   2  13   17.79    1.45
  -2   3  13    1.23    0.71
   2  -3  13    2.15    0.91
   2   3  13    1.39    1.11
   2  -3 -13    1.26    0.88
  -2  -3  13    2.19    1.16
  -2   3 -13    2.14    0.91
  -2   4  13    2.34    0.77
   2  -4  13    1.29    0.97
   2  -4 -13    2.28    0.95
   2   4  13    1.38    1.21
  -2  -4  13    1.85    1.70
  -2   4 -13    1.87    1.12
   2  -5  13   10.87    1.31
  -2   5  13    9.03    1.02
  -2  -5 -13   11.11    1.30
   2  -5 -13    9.29    1.28
  -2   5 -13   10.74    1.36
  -2  -5  13    9.89    1.61
   2   0  14   21.96    1.77
  -2   0  14   25.79    1.89
   2   0 -14   22.07    1.79
  -2   0 -14   22.51    1.72
  -2  -1 -14    7.25    1.07
   2   1 -14    7.11    1.19
  -2   1  14    7.39    1.29
   2  -1  14    5.28    1.06
   2   1  14    7.54    1.22
   2  -1 -14    7.55    1.13
  -2   1 -14    6.75    1.08
  -2  -2 -14   12.76    1.18
  -2   2  14   15.50    1.56
   2   2 -14   15.54    1.46
   2  -2  14   13.52    1.29
  -2   2 -14   15.49    1.37
   2   2  14   15.11    1.48
   2  -2 -14   16.14    1.33
   2  -3  14    2.86    1.04
   2  -3 -14    3.45    1.05
  -2   3 -14    2.25    1.06
   2  -4  14   10.45    1.33
   2  -4 -14    8.06    1.56
   2   4  14    9.68    1.60
  -2   4 -14    8.64    1.32
   2   0  15   16.15    1.57
  -2   0 -15   18.79    2.15
   2   0 -15   16.74    1.54
  -2  -1 -15    6.55    1.15
   2   1 -15    7.75    1.55
  -2   1  15    6.68    1.44
   2  -1  15    7.47    1.25
   2  -1 -15    7.91    1.24
  -2   1 -15    6.12    1.21
   2   1  15    5.94    2.13
   2  -2  15   26.37    2.10
   2   2 -15   30.24    2.33
  -2  -2 -15   28.74    1.92
  -2   2 -15   31.95    2.09
   2   2  15   25.01    1.96
   3   0   0    0.30    0.14
   3   0   0    0.12    0.14
  -3   0   0    0.27    0.13
   3   0   0    0.20    0.12
  -3   0   0   -0.03    0.09
   3   0   0    0.01    0.11
  -3  -1   0    1.04    0.18
   3  -1   0    1.00    0.14
  -3   1   0    1.59    0.17
  -3   1   0    1.00    0.16
  -3  -1   0    1.21    0.17
   3  -1   0    1.78    0.17
  -3  -1   0    1.29    0.13
  -3   1   0    1.22    0.13
   3  -1   0    1.71    0.19
   3   1   0    1.60    0.14
   3   1   0    1.44    0.19
  -3  -2   0  283.43    8.38
  -3  -2   0  289.75    8.33
   3   2   0  284.79    8.38
   3  -2   0  279.89    8.31
  -3  -2   0  296.58    8.38
   3   2   0  281.56    8.36
  -3   2   0  293.55    8.35
  -3   2   0  285.17    8.32
  -3   2   0  278.23    8.39
   3  -2   0  285.39    8.35
   3  -2   0  290.57    8.39
   3   3   0   20.16    0.78
  -3   3   0   20.65    0.79
  -3  -3   0   18.14    0.79
  -3   3   0   20.47    0.69
   3  -3   0   20.00    0.82
  -3  -3   0   20.50    0.76
  -3  -3   0   21.04    0.93
   3  -3   0   20.99    0.83
   3   3   0   19.37    0.83
  -3  -4   0  111.87    3.36
  -3  -4   0  109.39    3.36
   3   4   0  108.04    3.41
  -3   4   0  109.59    3.22
  -3   4   0  112.35    3.27
   3  -4   0  113.76    3.43
  -3   4   0  109.62    3.36
   3   4   0   97.17    3.30
  -3  -5   0  105.53    3.31
   3  -5   0  105.91    3.40
  -3   5   0  105.85    3.13
  -3   5   0  110.08    3.34
   3   5   0  100.09    3.38
  -3  -5   0  104.65    3.33
  -3  -6   0  128.22    3.94
   3   6   0  115.79    4.01
  -3  -6   0  126.82    3.88
  -3   6   0  121.56    3.91
   3  -6   0  122.59    4.00
  -3   7   0   18.00    1.17
  -3  -7   0   20.22    1.31
   3   7   0   20.71    1.29
   3  -7   0   19.35    1.29
  -3  -8   0   13.11    1.08
  -3   8   0   13.49    1.12
   3   8   0   12.25    1.17
   3  -8   0   13.39    1.18
   3  -9   0    2.16    1.07
   3   9   0    3.27    1.42
  -3  -9   0    0.93    0.95
  -3   9   0    2.03    0.99
   3   0  -1    0.23    0.12
  -3   0  -1    0.09    0.12
   3   0   1    0.32    0.11
  -3   0   1    0.30    0.08
  -3   0  -1   -0.03    0.15
  -3   0   1    0.07    0.12
   3   0   1    0.21    0.13
   3   0   1    0.04    0.15
   3   0  -1    0.26    0.14
   3   0  -1   -0.16    0.13
   3   0   1    0.18    0.10
   3  -1   1   18.02    0.64
   3   1  -1   18.94    0.67
  -3  -1  -1   18.10    0.63
  -3   1   1   18.03    0.63
   3   1  -1   19.11    0.69
  -3   1   1   17.15    0.64
   3  -1   1   19.52    0.72
  -3   1   1   17.95    0.62
  -3  -1  -1   18.18    0.64
  -3  -1  -1   18.47    0.67
  -3   1  -1   18.35    0.68
   3   1   1   18.45    0.65
  -3   1  -1   18.04    0.63
  -3  -1   1   19.29    0.69
  -3  -1   1   17.79    0.56
   3  -1  -1   18.65    0.64
   3  -1  -1   17.80    0.64
  -3   1  -1   17.92    0.59
   3   1   1   17.71    0.66
  -3  -1   1   18.73    0.67
   3   1   1   18.41    0.64
   3  -1  -1   18.43    0.64
   3   2  -1   41.70    1.33
  -3   2   1   38.25    1.23
  -3  -2  -1   41.03    1.33
   3  -2   1   38.70    1.27
  -3  -2  -1   40.68    1.29
  -3   2   1   39.59    1.28
  -3  -2  -1   40.62    1.29
   3   2  -1   41.11    1.36
   3  -2   1   40.10    1.34
   3  -2   1   37.82    1.26
   3   2   1   39.58    1.31
  -3   2  -1   40.66    1.26
  -3   2  -1   37.47    1.32
   3  -2  -1   40.67    1.32
  -3   2  -1   40.35    1.26
   3  -2  -1   39.19    1.29
   3  -2  -1   41.39    1.22
  -3  -2   1   40.73    1.23
   3   2   1   37.29    1.29
  -3  -2   1   39.92    1.33
  -3  -2   1   40.64    1.25
  -3  -2   1   39.34    1.32
   3   2   1   40.56    1.30
  -3   3   1   38.28    1.32
   3   3  -1   38.71    1.34
  -3  -3  -1   38.68    1.37
   3   3  -1   39.33    1.39
   3  -3   1   37.92    1.33
  -3  -3  -1   41.60    1.31
  -3  -3  -1   40.96    1.33
  -3   3   1   38.98    1.21
   3  -3   1   40.94    1.39
  -3  -3   1   39.25    1.29
   3   3   1   38.79    1.36
   3  -3  -1   41.12    1.37
  -3   3  -1   38.57    1.30
   3  -3  -1   38.36    1.21
  -3  -3   1   40.70    1.37
  -3   3  -1   39.58    1.26
  -3   3  -1   39.20    1.34
   3   4  -1    3.68    0.46
   3   4  -1    3.81    0.45
  -3  -4  -1    4.43    0.39
  -3  -4  -1    3.42    0.37
   3  -4   1    3.52    0.44
  -3   4   1    4.15    0.42
   3   4   1    3.43    0.40
  -3   4  -1    3.34    0.39
  -3   4  -1    3.95    0.45
  -3  -4   1    4.16    0.39
   3   4   1    4.11    0.48
   3  -4  -1    2.99    0.40
  -3  -4   1    3.76    0.44
  -3   4  -1    4.55    0.32
   3   5  -1   67.48    2.35
  -3  -5  -1   68.36    2.29
  -3  -5  -1   68.39    2.31
   3  -5   1   68.09    2.36
  -3   5   1   69.88    2.31
  -3  -5   1   71.58    2.35
   3  -5  -1   70.60    2.36
  -3   5  -1   67.43    2.29
  -3   5  -1   68.17    2.13
   3   5   1   69.10    2.35
  -3  -5   1   68.57    2.28
  -3  -6  -1   26.23    1.21
   3   6  -1   26.23    1.36
  -3   6   1   25.09    1.20
   3  -6   1   25.92    1.32
   3  -6  -1   25.08    1.37
  -3  -6   1   25.99    1.20
  -3  -6   1   25.95    1.31
   3   6   1   23.69    1.41
  -3   6  -1   24.04    1.16
   3   7  -1    4.27    0.77
   3  -7   1    5.18    0.81
  -3  -7  -1    3.87    0.69
  -3   7   1    4.25    0.72
   3   7   1    5.75    0.79
  -3  -7   1    4.20    0.65
   3  -7  -1    4.94    0.75
  -3   7  -1    5.70    0.75
  -3   8   1   16.23    1.18
   3  -8   1   14.89    1.23
   3   8  -1   16.38    1.26
  -3  -8  -1   14.99    1.17
   3   8   1   14.27    1.23
   3  -8  -1   13.99    1.21
  -3  -8   1   14.54    1.14
  -3   8  -1   17.65    1.21
   3   9  -1   10.64    1.61
  -3   9   1   10.04    1.17
  -3  -9  -1   11.84    1.20
   3  -9   1   10.90    1.32
  -3   9  -1   10.17    1.21
  -3  -9   1   10.46    1.23
   3  -9  -1   10.96    1.31
   3   0   2   -0.11    0.16
   3   0  -2    0.10    0.08
  -3   0   2    0.25    0.16
  -3   0  -2    0.35    0.18
  -3   0  -2    0.02    0.08
  -3   0   2    0.21    0.14
   3   0  -2    0.29    0.18
   3   0  -2    0.20    0.15
  -3   0  -2    0.40    0.14
   3   0   2    0.16    0.14
   3  -1   2    3.20    0.26
   3  -1   2    2.43    0.30
  -3   1   2    2.49    0.20
  -3  -1  -2    2.58    0.22
  -3  -1  -2    2.49    0.24
  -3   1   2    2.09    0.20
   3   1  -2    2.54    0.25
  -3  -1  -2    2.63    0.22
   3  -1   2    2.49    0.17
  -3   1   2    2.88    0.23
  -3   1  -2    2.76    0.23
   3  -1  -2    2.61    0.22
  -3  -1   2    2.64    0.27
  -3   1  -2    2.66    0.15
   3  -1  -2    2.87    0.22
   3   1   2    2.68    0.22
   3   1   2    3.45    0.26
   3   1   2    3.29    0.26
  -3   2   2  112.40    3.33
  -3   2   2  109.33    3.26
   3   2  -2  106.72    3.35
   3  -2   2  115.26    3.43
  -3   2   2  106.65    3.33
   3   2  -2  112.28    3.36
   3   2  -2  107.02    3.23
  -3  -2  -2  108.13    3.32
  -3  -2  -2  108.84    3.33
  -3  -2  -2  112.84    3.32
  -3   2  -2  107.48    3.36
   3  -2  -2  108.63    3.32
   3   2   2  113.57    3.35
   3  -2  -2  114.02    3.35
   3   2   2  108.06    3.32
  -3   2  -2  113.44    3.27
   3  -2  -2  110.23    3.25
   3   2   2  109.55    3.30
  -3  -2   2  106.67    3.34
  -3  -2   2  111.95    3.38
  -3   2  -2  113.61    3.31
  -3  -2   2  110.21    3.24
   3   3  -2   35.64    1.25
  -3  -3  -2   35.26    1.20
   3  -3   2   33.85    1.26
   3   3  -2   33.58    1.12
   3   3  -2   34.23    1.47
  -3  -3  -2   35.53    1.15
   3  -3   2   32.70    1.18
  -3   3   2   33.84    1.18
   3   3   2   34.69    1.22
  -3   3  -2   34.26    1.15
  -3  -3   2   34.19    1.27
  -3  -3   2   33.37    1.12
   3  -3  -2   32.65    1.22
  -3   3  -2   34.02    1.27
  -3   3  -2   34.16    1.15
  -3  -4  -2  335.01    9.54
  -3  -4  -2  322.50    9.62
   3   4  -2  318.27    9.64
   3   4  -2  316.07    9.54
   3  -4   2  336.24    9.68
  -3   4   2  331.69    9.61
  -3   4  -2  325.07    9.53
   3   4   2  326.20    9.63
  -3   4  -2  327.55    9.57
   3  -4  -2  336.04    9.67
   3   4   2  308.23    9.52
   3   5  -2    6.14    0.65
  -3  -5  -2    5.53    0.47
  -3   5   2    4.80    0.53
  -3  -5  -2    6.65    0.58
   3  -5   2    6.53    0.65
  -3   5  -2    6.11    0.46
  -3   5  -2    5.23    0.54
   3  -5  -2    4.39    0.54
  -3  -5   2    5.93    0.65
   3   5   2    6.73    0.63
  -3  -5   2    7.08    0.55
   3  -6   2   95.49    3.21
   3   6  -2   86.89    3.71
  -3   6   2   96.33    3.39
  -3  -6  -2   89.94    3.12
  -3   6  -2   95.09    2.93
  -3   6  -2   94.35    3.07
  -3  -6   2   96.21    3.16
  -3  -6   2   96.21    3.08
  -3   7   2    1.80    0.65
   3  -7   2    1.37    0.66
   3   7  -2    3.69    0.80
  -3  -7  -2    2.34    0.62
  -3  -7   2    0.92    0.97
  -3   7  -2    1.59    0.66
  -3  -7   2    2.36    0.65
   3  -7  -2    1.26    0.63
   3   7   2    2.43    0.75
   3  -8   2  101.96    3.57
  -3   8   2   99.74    3.44
   3   8  -2   98.35    3.48
  -3  -8  -2   94.78    3.45
  -3   8  -2   95.67    3.35
   3   8   2   95.62    3.46
  -3  -8   2   98.44    3.44
   3  -8  -2   94.23    3.48
   3   9  -2    6.41    1.85
  -3   9   2    4.48    1.61
  -3  -9  -2    5.42    1.10
   3  -9   2    6.05    1.18
  -3  -9   2    4.55    1.12
  -3   9  -2    5.00    1.07
  -3   0   3   -0.05    0.19
  -3   0  -3    0.23    0.16
   3   0  -3   -0.01    0.10
  -3   0  -3    0.06    0.18
   3   0  -3    0.22    0.20
   3   0  -3    0.07    0.11
  -3   0   3    0.09    0.17
   3   0   3   -0.03    0.18
   3   0   3    0.11    0.19
   3   1  -3   53.28    1.58
  -3   1   3   56.19    1.69
   3   1  -3   52.86    1.70
  -3  -1  -3   47.90    1.68
  -3  -1  -3   53.01    1.62
   3   1  -3   52.24    1.74
   3  -1   3   54.04    1.71
  -3   1   3   54.91    1.66
   3  -1   3   53.96    1.75
   3  -1   3   52.92    1.56
  -3  -1  -3   53.04    1.67
   3  -1  -3   52.08    1.68
   3   1   3   54.70    1.70
   3   1   3   54.23    1.62
  -3   1  -3   52.79    1.76
  -3  -1   3   55.01    1.75
   3  -1  -3   55.14    1.66
   3  -1  -3   52.48    1.67
  -3  -1   3   52.15    1.69
   3  -1  -3   51.28    1.66
   3   1   3   53.25    1.67
  -3   1  -3   54.08    1.69
  -3   1  -3   51.28    1.55
   3   2  -3   52.81    1.70
  -3   2   3   50.85    1.68
  -3  -2  -3   51.68    1.65
  -3  -2  -3   46.97    1.68
  -3  -2  -3   53.92    1.65
  -3   2   3   54.52    1.62
  -3   2   3   53.23    1.65
   3   2  -3   48.81    1.55
   3  -2   3   53.56    1.79
   3  -2   3   51.95    1.59
   3   2  -3   46.81    1.77
  -3  -2   3   54.25    1.77
  -3   2  -3   50.71    1.76
  -3   2  -3   52.20    1.67
  -3  -2   3   53.58    1.58
  -3   2  -3   50.64    1.57
  -3  -2   3   52.14    1.75
   3  -2  -3   52.12    1.68
   3  -2  -3   50.81    1.58
   3   2   3   51.42    1.64
   3   2   3   52.51    1.64
   3   3  -3   43.49    1.51
  -3  -3  -3   44.14    1.43
   3   3  -3   44.04    1.39
  -3   3   3   40.82    1.44
   3  -3   3   44.80    1.58
  -3   3  -3   46.82    1.70
  -3   3  -3   43.47    1.45
  -3   3  -3   44.33    1.40
   3   3   3   40.58    1.46
   3   3   3   42.86    1.54
  -3  -3   3   39.65    1.39
   3  -3  -3   44.93    1.51
   3  -4   3   89.23    2.83
  -3   4   3   85.66    2.73
   3   4  -3   81.13    2.66
  -3  -4  -3   86.06    2.63
   3   4  -3   86.56    2.77
  -3  -4  -3   86.12    2.76
  -3  -4   3   86.84    2.82
   3   4   3   85.27    2.74
   3  -4  -3   86.91    2.79
   3   4   3   82.48    2.63
  -3   4  -3   83.63    2.67
  -3  -4   3   84.28    2.68
  -3   4  -3   90.07    2.69
  -3  -5  -3   79.66    2.66
   3   5  -3   78.93    2.69
  -3   5   3   81.70    2.64
  -3  -5  -3   77.12    2.50
   3  -5   3   83.98    2.75
  -3   5  -3   79.24    2.58
  -3  -5   3   80.13    2.73
  -3   5  -3   80.36    2.55
   3  -5  -3   79.13    2.71
  -3  -5   3   81.51    2.60
   3   5   3   78.78    2.66
  -3   6   3    3.99    0.62
   3   6  -3    4.52    1.10
  -3  -6  -3    3.08    0.58
  -3   6  -3    4.16    0.59
  -3   6  -3    4.87    0.53
  -3  -6   3    3.77    0.75
   3   6   3    3.86    0.76
   3  -6  -3    4.98    0.67
  -3  -6   3    5.01    0.62
   3   7  -3   30.55    1.64
   3  -7   3   31.01    1.64
  -3   7   3   30.75    1.50
  -3  -7  -3   29.89    1.54
  -3  -7   3   32.38    1.71
   3  -7  -3   33.09    1.60
  -3  -7   3   32.58    1.55
  -3   7  -3   32.91    1.51
   3   7   3   31.47    1.57
   3   8  -3    0.50    0.86
  -3   8   3    0.37    0.73
   3  -8   3   -0.21    0.84
  -3  -8  -3   -0.17    0.73
  -3  -8   3   -0.48    0.78
  -3   8  -3    0.27    0.77
   3   8   3    0.56    0.84
   3  -8  -3   -0.20    0.73
  -3   9   3   12.04    1.26
  -3  -9  -3   10.20    1.24
   3  -9   3    8.55    1.33
   3  -9  -3    7.85    1.29
  -3   9  -3    9.27    1.18
   3   9   3    6.41    1.19
   3   0  -4    0.02    0.13
   3   0   4    0.03    0.26
  -3   0   4   -0.11    0.18
   3   0  -4    0.17    0.29
   3   0  -4    0.02    0.25
  -3   0   4    0.13    0.28
  -3   0   4   -0.06    0.17
  -3   0  -4   -0.01    0.21
   3   1  -4   71.76    2.52
   3  -1   4   82.59    2.59
  -3  -1  -4   80.29    2.44
  -3  -1  -4   84.74    2.51
  -3   1   4   86.24    2.50
   3   1  -4   78.21    2.43
  -3   1   4   81.65    2.54
   3   1   4   84.11    2.56
   3  -1  -4   81.02    2.52
   3   1   4   78.63    2.52
  -3   1  -4   85.73    2.54
  -3  -1   4   83.22    2.42
   3   1   4   80.06    2.43
   3  -1  -4   82.86    2.49
   3  -2   4   29.05    1.17
   3   2  -4   29.10    1.07
  -3  -2  -4   28.74    0.99
  -3   2   4   29.70    1.00
  -3   2   4   28.73    1.00
   3   2  -4   25.50    0.90
  -3  -2  -4   27.22    1.02
   3  -2   4   27.86    0.92
   3   2   4   30.36    1.11
   3  -2  -4   27.28    0.97
  -3   2  -4   27.90    0.90
   3  -2  -4   27.42    1.03
  -3   2  -4   27.15    1.04
  -3  -2   4   28.87    0.92
  -3  -2   4   28.26    1.17
   3   2   4   29.18    0.98
   3   2   4   28.37    1.02
   3  -3   4   53.71    1.92
  -3  -3  -4   54.01    1.70
   3   3  -4   52.88    1.80
   3   3  -4   49.45    1.65
   3  -3   4   54.92    1.78
  -3   3   4   53.92    1.63
  -3   3   4   50.88    1.73
  -3   3  -4   50.34    1.65
   3   3   4   53.14    1.74
   3   3   4   53.63    1.84
  -3  -3   4   52.84    1.88
   3  -3  -4   50.32    1.59
   3  -3  -4   54.34    1.79
  -3   3  -4   51.28    1.75
  -3  -3   4   52.56    1.70
   3  -4   4   29.40    1.37
  -3  -4  -4   32.41    1.23
   3   4  -4   32.38    1.25
  -3  -4  -4   29.05    1.08
  -3   4   4   29.48    1.16
   3   4  -4   28.56    1.13
   3  -4  -4   29.85    1.23
   3   4   4   29.85    1.19
  -3   4  -4   29.49    1.10
   3   4   4   28.50    1.11
  -3  -4   4   29.27    1.33
  -3   4  -4   29.89    1.17
  -3  -4   4   30.82    1.21
  -3   5   4    3.59    0.50
  -3  -5  -4    4.93    0.57
   3  -5   4    4.64    0.67
   3   5  -4    5.37    0.63
  -3  -5  -4    4.79    0.42
   3   5   4    3.96    0.57
  -3   5  -4    5.05    0.52
   3  -5  -4    4.59    0.58
  -3   5  -4    3.85    0.49
  -3  -5   4    4.56    0.70
  -3  -5   4    3.46    0.52
  -3  -6  -4   64.64    2.55
   3  -6   4   65.72    2.51
  -3   6   4   64.32    2.33
   3   6  -4   63.02    2.37
  -3  -6   4   68.30    2.49
  -3   6  -4   66.17    2.24
  -3  -6   4   63.11    2.31
   3  -6  -4   65.85    2.43
   3   6   4   68.27    2.36
  -3   6  -4   63.83    2.26
  -3   7   4   13.08    0.98
  -3  -7  -4   10.83    0.97
   3  -7   4    9.23    1.01
   3   7  -4   12.06    1.03
  -3   7  -4   11.93    0.94
  -3  -7   4   11.78    0.99
   3  -7  -4   11.06    0.99
   3   7   4   11.50    1.01
  -3  -7   4   13.37    1.17
  -3   8   4   25.95    1.62
   3  -8   4   26.31    1.84
   3   8  -4   26.76    1.76
  -3  -8  -4   27.11    1.66
  -3  -8   4   26.14    2.16
   3   8   4   25.97    1.64
   3  -8  -4   26.84    1.66
  -3   8  -4   26.23    1.56
  -3   9   4    6.27    1.12
   3   9  -4    6.74    1.31
  -3  -9  -4    6.30    1.30
   3  -9   4    6.77    2.02
   3  -9  -4    6.68    1.17
  -3   9  -4    6.47    1.12
   3   9   4    6.42    1.24
   3   0   5   -0.08    0.24
  -3   0   5    0.21    0.21
  -3   0   5   -0.04    0.21
  -3   0   5    0.07    0.31
   3   0  -5    0.06    0.19
  -3   0  -5   -0.09    0.22
  -3  -1  -5   58.69    1.88
  -3  -1  -5   57.07    1.78
   3   1  -5   58.26    1.90
   3   1  -5   54.77    1.81
   3  -1   5   58.20    1.95
  -3   1   5   57.84    1.92
  -3   1   5   59.89    1.86
   3  -1  -5   59.62    1.88
  -3  -1   5   58.60    2.00
   3  -1  -5   59.75    1.86
   3  -1  -5   54.51    1.92
  -3  -1   5   57.92    1.79
   3   1   5   61.09    1.94
   3   1   5   58.16    1.76
  -3   1  -5   59.99    1.92
   3  -2   5    5.90    0.56
  -3  -2  -5    5.31    0.38
  -3  -2  -5    5.25    0.43
  -3   2   5    5.06    0.39
   3   2  -5    6.32    0.48
   3  -2   5    4.55    0.34
  -3   2   5    5.61    0.44
   3   2  -5    4.72    0.38
  -3   2  -5    4.89    0.30
   3  -2  -5    5.15    0.47
   3   2   5    5.23    0.37
   3   2   5    4.88    0.48
  -3  -2   5    5.06    0.57
   3  -2  -5    5.10    0.42
  -3   2  -5    5.50    0.45
  -3  -2   5    4.66    0.33
  -3   3   5  108.01    3.21
  -3   3   5  106.91    3.14
   3  -3   5  103.86    3.39
  -3  -3  -5  101.97    3.17
   3   3  -5  103.01    3.27
   3   3   5  104.14    3.19
  -3   3  -5  100.30    3.12
   3   3   5  105.94    3.35
   3  -3  -5   96.99    3.10
   3  -3  -5  104.89    3.27
   3   3   5   98.92    3.25
  -3  -3   5  108.04    3.39
  -3  -3   5  106.89    3.16
  -3   3  -5  102.08    3.25
  -3   4   5    2.36    0.40
   3   4  -5    3.52    0.53
   3  -4   5    2.98    0.65
   3  -4  -5    2.72    0.47
  -3   4  -5    2.78    0.44
  -3   4  -5    2.43    0.38
  -3  -4   5    3.05    0.63
  -3  -4   5    4.16    0.53
   3   4   5    3.24    0.57
   3   4   5    3.36    0.47
   3   5  -5  170.22    5.20
  -3   5   5  164.80    5.14
  -3  -5  -5  165.47    5.01
  -3  -5  -5  168.33    5.22
   3  -5   5  169.95    5.36
   3   5   5  163.73    5.15
  -3   5  -5  167.73    5.13
  -3   5  -5  164.74    5.07
  -3  -5   5  173.26    5.15
   3  -5  -5  165.26    5.23
  -3  -5   5  166.05    5.30
  -3   6   5   21.31    1.17
   3  -6   5   22.19    1.45
  -3  -6  -5   23.32    1.21
   3   6  -5   21.35    1.24
  -3   6  -5   21.39    1.13
   3  -6  -5   21.33    1.24
  -3   6  -5   20.91    1.16
  -3  -6   5   21.42    1.22
   3   6   5   22.23    1.25
  -3  -6   5   18.64    1.40
  -3   7   5   67.84    2.52
  -3  -7  -5   71.85    2.64
   3  -7   5   66.39    2.78
   3   7  -5   67.68    2.59
  -3   7  -5   68.80    2.45
   3  -7  -5   70.96    2.69
  -3  -7   5   68.38    2.59
  -3   7  -5   66.80    2.48
  -3  -7   5   67.09    3.00
   3   7   5   68.41    2.57
  -3  -8  -5    3.71    0.91
   3   8  -5    3.05    1.01
  -3   8   5    2.98    0.89
   3  -8   5    1.61    1.02
   3  -8  -5    2.47    0.91
  -3   8  -5    1.99    0.87
   3   8   5    4.23    0.99
   3  -9   5   24.19    2.52
   3   9  -5   24.16    1.72
  -3  -9  -5   23.91    1.90
  -3   9   5   24.43    1.83
   3  -9  -5   23.56    1.75
   3   9   5   22.80    1.67
  -3   9  -5   26.47    1.81
  -3   0  -6    0.25    0.14
   3   0   6   -0.09    0.28
  -3   0  -6    0.02    0.27
  -3   0   6    0.06    0.36
   3   0  -6   -0.16    0.26
  -3   0   6   -0.23    0.25
  -3   0  -6    0.01    0.12
   3   0  -6    0.02    0.25
  -3   1   6   15.23    0.81
   3   1  -6   15.25    0.76
   3  -1   6   15.98    0.83
  -3   1   6   14.86    0.69
  -3  -1  -6   14.28    0.62
  -3  -1  -6   16.15    0.73
  -3   1   6   15.19    0.79
  -3  -1   6   15.47    0.88
   3   1   6   15.59    0.57
  -3  -1   6   14.89    0.65
  -3   1  -6   14.98    0.77
   3   1   6   15.81    0.78
   3  -2   6   21.72    1.05
  -3   2   6   21.78    0.87
   3  -2   6   21.82    0.75
  -3  -2  -6   22.27    0.93
  -3  -2  -6   22.20    0.89
   3   2  -6   22.07    0.95
  -3   2  -6   21.81    0.73
  -3   2  -6   21.69    0.97
  -3  -2   6   21.41    1.11
   3  -2  -6   21.63    0.93
   3   2   6   22.46    1.03
   3  -2  -6   20.60    0.99
  -3  -2   6   22.26    0.82
   3   2   6   22.68    0.83
   3   3  -6    8.69    0.60
  -3  -3  -6   10.24    0.60
   3   3  -6   10.74    0.70
  -3   3   6   10.22    0.63
   3  -3   6    8.57    0.60
  -3   3   6    9.55    0.61
   3  -3   6    9.86    0.79
   3   3   6    9.59    0.78
  -3   3  -6    9.21    0.52
   3  -3  -6   10.11    0.71
   3   3   6    9.04    0.60
  -3  -3   6    9.20    0.82
  -3  -3   6    9.24    0.55
  -3   3  -6    9.59    0.71
   3  -3  -6   11.53    0.71
  -3   4   6   23.65    1.06
   3   4  -6   24.74    1.13
   3  -4   6   22.68    1.29
  -3  -4  -6   24.94    0.99
  -3   4  -6   23.42    0.97
  -3  -4   6   23.70    1.31
   3   4   6   23.88    1.05
  -3  -4   6   24.75    1.04
   3   4   6   24.52    1.31
   3  -4  -6   23.77    1.13
  -3   4  -6   23.55    1.13
  -3  -5  -6   32.47    1.62
  -3   5   6   35.53    1.44
   3   5  -6   37.12    1.53
   3  -5   6   35.77    1.77
  -3  -5   6   35.22    1.73
  -3   5  -6   35.11    1.35
  -3  -5   6   34.72    1.47
   3  -5  -6   37.09    2.20
   3   5   6   33.50    1.42
  -3   5  -6   34.00    1.46
  -3  -6  -6   20.94    1.26
   3  -6   6   20.82    1.60
   3   6  -6   24.06    1.35
  -3   6   6   23.86    1.22
   3  -6  -6   21.62    1.34
  -3  -6   6   24.64    1.71
  -3  -6   6   22.29    1.36
  -3   6  -6   23.12    1.26
   3   6   6   23.86    1.29
  -3   6  -6   24.40    1.18
  -3  -7  -6   10.06    1.03
  -3   7   6   14.41    1.08
   3   7  -6   14.36    1.14
   3  -7   6   10.58    1.28
  -3   7  -6   13.41    1.02
   3  -7  -6   11.64    1.07
  -3   7  -6   12.58    1.02
  -3  -7   6   14.68    1.33
   3   7   6   14.26    1.12
   3   8  -6   12.69    1.27
   3  -8   6   13.23    1.54
  -3  -8  -6   14.96    1.32
  -3   8   6   10.25    1.07
   3  -8  -6   15.97    1.38
   3   8   6   12.63    1.23
   3   0  -7   -0.08    0.31
  -3   0  -7    0.03    0.14
  -3   0   7    0.18    0.33
  -3   0  -7    0.27    0.18
  -3   0   7    0.17    0.40
  -3   0  -7    0.26    0.33
   3   0   7   -0.05    0.33
  -3  -1  -7   47.09    1.69
   3   1  -7   48.36    1.71
   3  -1   7   50.78    1.78
  -3   1   7   50.11    1.67
   3   1  -7   44.16    1.68
  -3  -1  -7   45.50    1.56
  -3   1   7   51.81    1.80
  -3   1   7   51.01    1.74
   3   1   7   50.52    1.77
  -3  -1   7   47.93    1.85
   3   1   7   51.25    1.53
  -3  -1   7   49.78    1.63
  -3   1  -7   49.60    1.74
  -3  -2  -7   48.14    1.66
   3   2  -7   49.83    1.73
  -3  -2  -7   47.18    1.66
  -3   2   7   49.07    1.73
   3  -2   7   48.16    1.80
   3   2  -7   46.12    1.67
  -3   2   7   49.02    1.65
  -3  -2   7   48.31    1.88
   3   2   7   49.30    1.82
  -3   2  -7   47.45    1.48
  -3  -2   7   48.78    1.59
   3   2   7   49.47    1.57
   3  -2  -7   48.18    1.70
  -3   2  -7   48.19    1.75
  -3   3   7   78.71    2.60
   3  -3   7   76.84    2.71
   3   3  -7   82.38    2.62
  -3  -3  -7   77.83    2.52
  -3   3   7   77.39    2.53
  -3   3  -7   75.71    2.41
   3   3   7   78.11    2.50
  -3  -3   7   80.45    2.81
  -3   3  -7   76.54    2.63
  -3  -3   7   80.84    2.51
   3   3   7   80.11    2.74
   3  -3  -7   79.84    2.63
  -3  -4  -7   15.33    0.81
   3   4  -7   15.35    0.95
   3  -4   7   14.25    1.10
  -3   4   7   13.85    0.82
   3   4   7   14.35    0.84
  -3  -4   7   15.14    1.18
   3  -4  -7   15.20    0.93
  -3  -4   7   15.05    0.81
  -3   4  -7   13.74    0.76
   3   4   7   14.86    1.15
  -3   4  -7   16.00    0.97
  -3  -5  -7   97.53    3.29
   3  -5   7   93.43    3.48
  -3   5   7   95.84    3.16
   3   5  -7   94.85    3.22
   3   5   7   99.44    3.16
  -3   5  -7   94.41    3.06
  -3   5  -7  100.50    3.25
  -3  -5   7  100.27    3.45
   3  -5  -7   90.46    3.27
  -3  -5   7   98.31    3.15
  -3  -6  -7    4.38    0.72
  -3   6   7    5.03    0.70
   3   6  -7    3.43    0.76
   3  -6   7    4.82    0.97
  -3   6  -7    5.08    0.96
  -3  -6   7    5.03    1.00
   3   6   7    4.59    0.75
  -3   6  -7    4.70    0.74
   3  -6  -7    3.43    0.73
   3  -7   7   22.47    1.83
  -3  -7  -7   18.76    1.44
  -3   7   7   20.22    1.32
   3   7  -7   21.81    1.52
   3  -7  -7   20.20    1.48
  -3  -7   7   23.39    1.65
   3   7   7   20.96    1.47
  -3   7  -7   20.69    1.43
  -3  -8  -7    6.53    1.38
   3   8  -7    6.03    1.13
   3  -8   7    4.75    1.35
  -3   8   7    5.97    1.49
  -3  -8   7    4.64    1.95
   3   8   7    5.17    1.03
   3  -8  -7    6.56    1.40
  -3   0   8   -0.22    0.38
   3   0  -8    0.14    0.33
   3   0   8   -0.80    0.38
  -3   0  -8    0.00    0.18
  -3   0  -8    0.03    0.37
  -3   0   8   -0.13    0.47
  -3   1   8    8.49    0.59
   3  -1   8    6.51    0.62
   3   1  -8    8.90    0.64
  -3   1   8    8.78    0.69
  -3  -1  -8    9.34    0.72
  -3   1   8    8.57    0.74
  -3  -1   8    7.54    0.76
  -3  -1   8    7.81    0.64
   3   1   8    9.38    0.74
   3   1   8    8.39    0.46
  -3   1  -8    6.82    0.62
  -3  -2  -8   23.65    1.06
  -3   2   8   24.85    1.02
  -3   2   8   24.39    1.18
   3   2  -8   25.02    1.11
   3  -2   8   23.09    1.17
   3  -2  -8   23.76    1.09
   3   2   8   25.25    0.92
  -3  -2   8   23.26    0.99
  -3   2  -8   23.31    1.15
  -3  -2   8   23.44    1.29
   3   2   8   25.57    1.26
  -3   3   8    8.34    0.69
   3  -3   8    7.55    0.77
  -3  -3  -8    9.05    0.62
  -3   3   8    7.37    0.59
   3   3  -8    7.50    0.68
  -3   3  -8    7.75    0.70
   3   3   8    9.23    0.59
  -3  -3   8    7.67    0.64
   3   3   8    8.48    0.84
   3  -3  -8    7.78    0.68
  -3  -3   8    8.47    0.90
   3   4  -8    8.71    0.78
  -3  -4  -8   10.27    0.78
   3  -4   8   10.66    0.93
  -3   4   8   10.32    1.18
  -3  -4   8    8.66    0.98
   3   4   8   11.24    0.99
   3   4   8   10.37    0.77
  -3  -4   8   10.89    0.75
  -3   5   8   21.52    1.13
  -3  -5  -8   22.79    1.29
   3  -5   8   20.42    1.45
   3   5  -8   22.42    1.46
   3  -5  -8   23.09    1.32
  -3  -5   8   21.02    1.55
  -3   5  -8   22.44    1.29
   3   5   8   22.57    1.44
  -3  -6  -8    2.30    0.69
  -3   6   8    2.18    0.65
   3  -6   8    3.49    0.93
   3   6  -8    2.83    0.77
   3   6   8    3.08    0.72
   3  -6  -8    3.77    0.79
  -3  -6   8    2.80    1.02
  -3   6  -8    3.36    0.77
   3   7  -8    5.55    1.00
  -3  -7  -8    4.90    0.90
  -3   7   8    6.85    0.88
   3  -7   8    6.47    1.15
   3   7   8    5.70    0.92
   3  -7  -8    5.86    0.99
  -3   7  -8    7.28    1.01
  -3  -7   8    4.56    1.26
  -3   8   8    2.95    0.94
   3   8  -8    2.72    1.09
  -3  -8  -8    2.61    1.05
   3  -8   8    2.18    1.26
   3  -8  -8    2.49    1.07
  -3  -8   8    2.80    1.42
  -3   0   9    0.08    0.46
   3   0   9    0.11    0.45
  -3   0   9   -0.07    0.54
   3   0  -9    0.11    0.40
  -3   0  -9    0.15    0.44
   3   1  -9   31.00    1.29
  -3  -1  -9   31.43    1.33
  -3   1   9   29.39    1.37
   3  -1   9   30.96    1.38
  -3   1   9   31.28    1.25
  -3   1   9   29.12    1.45
  -3  -1   9   31.57    1.27
  -3  -1   9   33.34    1.55
  -3   1  -9   32.09    1.38
   3   1   9   30.22    1.41
   3   1   9   28.10    1.06
   3   2  -9    7.92    0.68
   3  -2   9    7.02    0.74
  -3   2   9    7.13    0.73
  -3  -2  -9    6.10    0.61
  -3   2   9    6.38    0.56
  -3   2  -9    6.17    0.71
   3   2   9    8.41    0.52
  -3  -2   9    7.08    0.58
   3   2   9    6.21    0.76
  -3  -2   9    6.21    0.85
   3  -2  -9    7.00    0.66
  -3   3   9   90.00    2.87
   3  -3   9   85.60    3.03
   3   3  -9   87.87    2.93
  -3  -3  -9   83.92    2.85
   3   3   9   89.80    3.11
  -3   3  -9   85.50    3.00
   3   3   9   88.62    2.78
  -3  -3   9   88.36    2.81
   3  -3  -9   89.77    2.98
   3  -3  -9   86.52    2.84
  -3  -3   9   89.11    3.18
  -3   4   9    2.42    0.55
   3  -4   9    2.96    0.69
   3   4  -9    2.46    0.62
  -3  -4  -9    3.18    0.55
   3  -4  -9    2.83    0.64
  -3   4  -9    3.24    0.67
   3   4   9    2.91    0.54
  -3  -4   9    3.24    0.65
   3   4   9    2.13    0.78
  -3  -4   9    3.85    0.90
  -3  -5  -9   72.94    2.71
   3   5  -9   72.95    2.60
   3  -5   9   66.36    2.73
  -3   5   9   72.90    2.51
   3  -5  -9   72.72    2.69
  -3  -5   9   71.95    2.92
   3   5   9   70.43    2.49
  -3   5  -9   70.84    2.65
   3   6  -9   14.32    1.14
  -3   6   9   12.51    1.01
   3  -6   9   14.12    1.34
  -3  -6  -9   13.21    1.16
   3   6   9   14.85    1.07
  -3   6  -9   16.29    1.18
   3  -6  -9   15.36    1.24
  -3  -6   9   14.24    1.43
  -3  -7  -9   57.93    2.80
  -3   7   9   58.34    2.42
   3  -7   9   59.74    2.83
   3   7  -9   61.61    2.57
   3   7   9   61.25    2.46
  -3  -7   9   63.53    2.99
  -3   7  -9   58.46    2.56
   3  -7  -9   62.72    2.70
  -3   0  10   -0.05    0.64
   3   0 -10    0.01    0.44
  -3   0 -10   -0.30    0.54
  -3   0  10   -0.03    0.54
   3   1 -10   12.08    0.83
  -3   1  10    9.59    0.93
  -3   1  10    9.61    0.74
  -3  -1 -10   10.62    0.81
  -3   1  10   10.00    0.89
   3   1  10   10.90    0.92
  -3  -1  10   10.44    0.78
  -3  -1  10    9.93    1.07
  -3   1 -10    9.33    0.81
  -3  -2 -10    6.36    0.66
   3   2 -10    8.17    0.74
  -3   2  10    7.24    0.83
   3  -2  10    6.28    0.82
  -3   2  10    6.83    0.64
  -3   2 -10    7.01    0.76
   3   2  10    6.54    0.83
   3   2  10    7.16    0.55
  -3  -2  10    8.23    0.98
  -3  -2  10    7.09    0.66
   3  -2 -10    7.59    0.74
  -3   3  10    5.62    0.61
  -3  -3 -10    6.12    0.65
   3  -3  10    6.57    0.81
   3   3 -10    5.44    0.69
   3   3  10    6.61    0.91
  -3  -3  10    7.28    0.67
  -3  -3  10    6.62    0.99
   3   3  10    7.96    0.62
   3  -3 -10    7.15    0.78
  -3   3 -10    4.97    0.76
   3  -3 -10    5.66    0.70
   3  -4  10   33.00    1.66
  -3  -4 -10   32.80    1.89
  -3   4  10   28.93    1.37
   3   4  10   31.64    1.35
   3   4  10   30.73    1.85
   3  -4 -10   33.35    1.60
  -3   4 -10   30.74    1.61
  -3  -4  10   28.95    1.83
  -3   5  10    2.65    0.67
   3   5 -10    4.27    0.80
  -3  -5 -10    2.64    0.77
   3  -5  10    2.54    0.83
  -3   5 -10    3.08    0.83
  -3  -5  10    3.23    1.10
   3  -5 -10    2.87    0.76
   3   5  10    3.19    0.68
   3   6 -10   13.28    1.16
  -3  -6 -10   12.11    1.19
   3  -6  10   10.50    1.22
  -3   6  10   12.70    1.05
   3   6  10   12.84    1.06
  -3   6 -10   12.03    1.19
   3  -6 -10   11.52    1.21
  -3  -6  10   10.95    1.46
   3  -7  10   14.20    1.46
   3   7 -10   14.01    1.38
  -3   7  10   10.29    1.13
  -3   7 -10   13.52    1.33
   3  -7 -10   14.03    1.42
  -3  -7  10   13.13    1.67
   3   7  10   14.85    1.24
  -3   0  11    0.19    0.64
  -3   0  11    0.22    0.70
   3   0 -11   -0.12    0.53
  -3   0 -11    0.04    0.56
   3   0  11    0.00    0.59
   3  -1  11    0.44    0.60
  -3  -1 -11    0.93    0.57
  -3   1  11    0.47    0.72
   3   1 -11    0.75    0.56
   3  -1 -11    0.64    0.54
   3   1  11    1.01    0.66
  -3   1 -11    0.30    0.58
  -3  -1  11    0.52    0.62
  -3  -1  11    0.07    0.76
   3  -2  11    0.50    0.64
   3   2 -11    0.79    0.60
  -3   2  11    1.20    0.59
  -3   2  11    1.31    0.73
  -3  -2 -11    0.54    0.58
  -3   2 -11    0.64    0.62
   3  -2 -11    1.25    0.70
   3   2  11    0.55    0.72
  -3  -2  11    1.37    0.85
  -3  -2  11    0.99    0.61
   3  -3  11   18.89    1.34
  -3  -3 -11   18.39    1.31
   3   3 -11   17.15    1.20
  -3   3  11   19.06    1.11
   3   3  11   18.78    1.38
  -3  -3  11   19.55    1.48
  -3   3 -11   18.93    1.34
   3  -3 -11   18.94    1.27
   3   4 -11    9.98    0.94
  -3   4  11   10.78    0.88
   3  -4  11   10.35    1.05
   3  -4 -11   10.47    1.02
  -3  -4  11    8.85    1.23
  -3   4 -11    9.59    1.03
   3   4  11    9.34    1.23
   3   5 -11   23.03    1.50
   3  -5  11   22.59    1.65
  -3   5  11   21.51    1.36
  -3  -5 -11   23.03    1.60
   3   5  11   24.50    1.67
  -3  -5  11   23.06    1.76
  -3   5 -11   25.45    1.69
   3  -5 -11   22.86    1.61
   3  -6  11   13.10    1.34
  -3   6  11   12.12    1.11
  -3  -6 -11   12.49    1.40
  -3   6 -11   14.01    1.31
  -3  -6  11   10.15    1.55
   3  -6 -11   11.95    1.38
   3   6  11   12.17    1.12
   3   0 -12    0.16    0.63
  -3   0  12   -0.03    0.79
  -3   0 -12    0.41    0.65
   3   0  12    0.58    0.69
  -3   0  12    0.11    0.76
  -3  -1 -12    4.55    0.78
   3   1 -12    3.57    0.74
  -3   1  12    4.77    0.95
   3  -1  12    4.99    0.84
  -3   1  12    4.83    0.95
  -3   1 -12    4.57    0.82
   3   1  12    5.28    0.88
  -3  -1  12    4.10    0.98
   3  -1 -12    4.36    0.73
  -3  -1  12    5.37    0.86
  -3  -2 -12    8.35    0.88
   3   2 -12   10.82    1.01
  -3   2  12    6.82    0.80
   3  -2  12    7.84    0.95
  -3  -2  12    8.57    1.20
   3  -2 -12    8.75    0.93
   3   2  12    8.01    1.07
  -3   2 -12    7.52    0.94
   3  -2 -12    8.32    0.94
  -3   3  12    4.26    0.72
  -3  -3 -12    4.62    0.77
   3  -3  12    5.17    0.93
   3   3 -12    6.02    1.03
  -3   3 -12    5.74    0.92
   3   3  12    5.15    1.10
   3  -3 -12    5.18    0.87
  -3  -3  12    4.21    1.14
   3  -4  12   22.79    1.67
  -3   4  12   22.31    1.35
   3   4  12   24.29    1.98
  -3  -4  12   27.52    2.06
   3  -4 -12   21.68    1.62
  -3   4 -12   22.98    1.65
   3  -5  12    3.57    1.00
  -3   5  12    2.70    0.81
   3  -5 -12    3.55    1.01
  -3   5 -12    2.64    1.02
  -3  -5  12    2.84    1.30
  -3   0  13   -0.02    0.94
   3   0 -13   -0.26    0.81
   3   0  13   -0.07    0.80
  -3   0  13   -0.20    0.90
  -3   0 -13   -0.10    0.75
   3  -1  13    0.45    0.78
  -3   1  13   -0.42    0.95
  -3  -1 -13   -0.10    0.73
  -3  -1  13    0.17    0.94
  -3   1 -13   -0.07    0.78
   3   1  13    0.01    0.86
   3  -1 -13    0.35    0.81
   3  -1 -13    0.30    0.69
   3  -2  13   18.90    1.53
  -3  -2 -13   18.07    1.40
  -3   2 -13   19.88    1.55
  -3  -2  13   18.71    1.58
   3  -2 -13   18.44    1.47
   3  -2 -13   18.57    1.32
   3   2  13   18.41    1.48
  -3  -3 -13    9.76    0.99
   3  -3  13   10.09    1.17
  -3   3  13    7.70    0.92
   3   3  13    8.24    1.30
   3  -3 -13    9.78    1.12
  -3   3 -13    9.92    1.15
  -3  -3  13    8.76    1.39
  -3   4  13    4.96    0.87
   3  -4  13    6.42    1.12
   3  -4 -13    8.41    1.16
  -3  -5 -13    3.55    1.14
   3  -5  13    4.23    1.16
  -3   5  13    2.93    0.90
  -3   5 -13    3.24    1.13
  -3  -5  13    3.81    1.48
   3  -5 -13    4.45    1.17
   3   0 -14   -0.23    0.94
   3   0  14    0.09    0.95
  -3   0 -14    0.31    0.87
  -3  -1 -14    2.42    0.91
   3  -1  14    2.59    1.00
  -3   1  14    3.32    1.23
  -3   1 -14    2.50    0.96
   3  -1 -14    2.49    1.04
  -3  -1  14    4.04    1.20
   3   1  14    2.08    1.10
   3  -2  14   11.91    1.27
  -3  -2 -14   13.76    1.23
  -3   2 -14   12.39    1.63
   3  -2 -14   15.96    1.37
   3   2  14   11.28    1.42
  -3  -2  14   15.38    1.62
   3  -3  14    4.35    1.09
  -3   3  14    2.61    1.07
  -3  -3  14    4.32    1.38
  -3   3 -14    3.81    1.11
   3  -3 -14    4.36    1.10
   3   3  14    4.03    1.35
   3   0 -15   -0.45    1.23
  -3   0 -15    0.20    1.69
  -3  -1 -15    3.01    1.07
   3   1 -15    3.09    1.24
   3  -1 -15    3.12    1.18
  -3   1 -15    3.59    1.15
   3   1  15    3.72    1.29
  -4   0   0   14.34    0.58
   4   0   0   14.64    0.54
   4   0   0   14.18    0.56
   4   0   0   13.63    0.54
   4   0   0   14.28    0.58
  -4   1   0    4.41    0.26
   4  -1   0    5.15    0.35
   4  -1   0    5.05    0.28
  -4  -1   0    4.70    0.26
  -4   1   0    4.92    0.32
   4   1   0    5.20    0.35
   4   1   0    4.58    0.25
   4   1   0    4.84    0.38
  -4   1   0    4.64    0.32
   4  -1   0    4.45    0.32
  -4  -1   0    4.20    0.33
  -4  -1   0    4.25    0.32
   4   2   0    1.84    0.21
  -4  -2   0    2.05    0.30
  -4  -2   0    1.51    0.25
   4  -2   0    1.88    0.27
   4   2   0    1.66    0.28
  -4  -2   0    1.60    0.20
  -4   2   0    1.64    0.28
   4  -2   0    1.98    0.27
  -4   2   0    1.89    0.22
   4  -2   0    1.61    0.21
  -4   2   0    1.38    0.20
   4   2   0    1.44    0.29
   4  -3   0    4.76    0.36
  -4  -3   0    4.98    0.38
  -4   3   0    5.43    0.36
  -4   3   0    5.22    0.39
   4   3   0    4.94    0.45
   4  -3   0    5.19    0.43
   4   3   0    5.24    0.43
  -4  -3   0    5.12    0.45
  -4   4   0   60.22    1.94
   4   4   0   60.59    2.07
  -4  -4   0   60.24    2.02
  -4   4   0   60.37    1.98
   4  -4   0   58.90    2.06
  -4  -4   0   62.52    1.98
  -4   4   0   60.77    1.87
  -4  -5   0    4.53    0.54
  -4   5   0    4.83    0.52
  -4  -5   0    5.68    0.52
  -4   5   0    5.95    0.37
   4   5   0    5.69    0.64
   4  -5   0    5.87    0.60
  -4   6   0   21.86    1.09
   4  -6   0   21.26    1.42
   4   6   0   22.33    1.23
  -4  -6   0   20.97    1.11
  -4   7   0   12.12    0.94
   4   7   0   12.48    1.04
   4  -7   0   11.82    1.01
  -4  -7   0   11.44    0.91
   4   8   0   -0.08    0.81
  -4   8   0   -0.02    0.75
  -4  -8   0   -0.22    0.67
   4  -8   0   -0.58    0.82
   4   9   0    0.67    1.23
  -4  -9   0    1.22    0.95
  -4   9   0    0.59    0.94
  -4   0  -1  998.31   27.65
  -4   0   1  989.24   27.65
   4   0  -1  984.78   27.64
   4   0  -1  953.07   27.64
   4   0   1  908.84   27.59
   4   0  -1  989.03   27.59
   4   0   1  898.48   27.63
  -4   0  -1  958.77   27.65
   4   0  -1  924.14   27.62
  -4  -1  -1   77.30    2.38
   4   1  -1   82.56    2.44
  -4   1   1   76.60    2.39
   4  -1   1   83.33    2.48
  -4  -1  -1   79.20    2.44
  -4   1   1   77.82    2.38
  -4  -1  -1   76.77    2.38
   4   1  -1   80.98    2.31
  -4   1   1   76.82    2.39
   4   1  -1   78.75    2.42
  -4  -1   1   78.67    2.32
  -4  -1   1   81.35    2.45
   4   1   1   80.39    2.40
   4   1   1   73.93    2.42
   4  -1  -1   79.85    2.39
   4  -1  -1   78.32    2.40
   4   1   1   80.95    2.39
  -4  -1   1   74.83    2.41
  -4   1  -1   81.06    2.40
  -4   1  -1   79.10    2.34
  -4   2   1  388.14   11.54
  -4   2   1  394.97   11.48
   4   2  -1  384.75   11.53
  -4   2   1  409.90   11.51
  -4  -2  -1  382.08   11.53
   4   2  -1  397.46   11.56
   4  -2   1  401.67   11.48
  -4  -2  -1  382.14   11.52
  -4  -2  -1  388.30   11.49
   4   2   1  407.00   11.52
  -4  -2   1  405.28   11.44
   4  -2  -1  391.42   11.51
  -4  -2   1  388.50   11.54
  -4  -2   1  401.11   11.44
   4   2   1  380.23   11.53
  -4   2  -1  394.68   11.49
  -4   2  -1  405.37   11.47
  -4  -2   1  409.22   11.57
   4  -2  -1  399.37   11.54
   4  -2  -1  384.99   11.47
   4   2   1  402.08   11.53
  -4   3   1   62.04    2.00
  -4  -3  -1   65.17    2.09
   4  -3   1   61.37    2.03
  -4  -3  -1   65.97    2.01
   4  -3   1   61.30    2.01
  -4  -3  -1   62.61    2.03
   4  -3   1   61.57    2.08
   4   3  -1   63.02    2.07
  -4   3   1   62.19    1.93
  -4   3  -1   63.45    1.96
  -4   3  -1   71.62    2.25
   4  -3  -1   63.10    2.06
   4  -3  -1   62.59    1.92
  -4  -3   1   67.36    2.09
   4   3   1   60.06    2.03
  -4  -3   1   62.30    1.98
  -4  -3   1   65.01    1.96
   4   3   1   61.45    2.05
   4  -4   1  114.40    3.61
  -4  -4  -1  119.51    3.54
  -4   4   1  112.03    3.39
   4   4  -1  113.78    3.60
  -4   4   1  111.91    3.41
  -4   4   1  111.61    3.52
  -4  -4  -1  116.07    3.54
   4   4   1  116.58    3.59
  -4   4  -1  114.72    3.44
  -4  -4   1  113.38    3.58
  -4   4  -1  117.63    3.51
   4  -4  -1  115.76    3.60
  -4   4  -1  111.50    3.52
   4  -5   1   18.31    1.01
  -4   5   1   17.03    0.88
  -4  -5  -1   18.75    0.91
  -4  -5  -1   17.62    0.89
   4   5  -1   16.52    1.00
   4   5   1   15.85    1.01
  -4  -5   1   16.94    0.99
   4  -5  -1   16.08    0.96
  -4   5  -1   16.36    0.73
  -4  -5   1   17.19    0.86
  -4   5  -1   16.56    0.88
   4   6  -1    5.99    0.74
  -4  -6  -1    4.80    0.60
  -4  -6  -1    5.10    0.63
   4  -6   1    5.32    0.87
  -4   6   1    6.44    0.68
  -4  -6   1    6.47    0.65
   4   6   1    6.53    0.82
  -4   6  -1    6.22    0.65
   4  -6  -1    6.57    0.73
  -4  -6   1    6.44    0.79
  -4  -7  -1    0.02    0.76
   4  -7   1    0.46    0.67
   4   7  -1    0.71    0.70
  -4   7   1    0.22    0.60
   4  -7  -1   -0.25    0.65
  -4  -7   1    0.18    0.53
   4   7   1   -0.04    0.67
  -4   7  -1    0.26    0.62
   4   8  -1   22.17    1.52
  -4  -8  -1   19.67    1.44
  -4   8   1   17.89    1.27
   4  -8   1   19.69    1.58
   4  -8  -1   19.88    1.56
   4   8   1   20.58    1.55
  -4   8  -1   19.60    1.33
  -4  -8   1   17.47    1.39
   4   9  -1    5.45    1.34
  -4   9   1    4.53    1.08
  -4  -9  -1    5.41    1.04
  -4   9  -1    5.45    1.07
   4   9   1    6.30    1.31
   4   0  -2   20.56    0.63
   4   0  -2   18.55    0.74
   4   0   2   19.60    0.64
   4   0  -2   19.08    0.74
  -4   0   2   18.70    0.63
  -4   0   2   19.54    0.75
   4   0   2   20.29    0.65
  -4   0  -2   20.38    0.73
   4   0   2   19.45    0.74
   4   0  -2   18.92    0.77
   4   0   2   19.34    0.76
   4   1  -2  102.51    3.15
   4   1  -2  104.03    3.15
   4  -1   2  105.92    3.20
  -4   1   2  103.60    3.10
  -4  -1  -2  100.42    3.07
   4  -1   2  103.43    3.12
  -4   1   2  108.11    3.12
   4  -1   2  104.94    3.03
  -4  -1  -2  106.66    3.14
  -4   1   2  100.51    3.09
  -4   1  -2  100.36    3.16
   4  -1  -2  103.45    3.09
   4  -1  -2  103.36    3.10
  -4  -1   2   99.73    3.13
  -4   1  -2  102.04    3.12
  -4   1  -2  102.29    3.03
  -4  -1   2  107.66    3.18
   4   1   2  102.43    3.13
   4  -1  -2  104.10    3.11
   4   1   2  100.79    3.08
   4   1   2  104.97    3.12
  -4   2   2   12.67    0.60
  -4  -2  -2   11.45    0.58
   4  -2   2   13.83    0.70
   4  -2   2   12.89    0.52
   4   2  -2   13.39    0.64
  -4   2   2   12.60    0.55
   4  -2   2   12.37    0.60
  -4  -2  -2   12.26    0.63
  -4   2   2   12.94    0.52
  -4  -2  -2   12.05    0.59
  -4   2  -2   11.85    0.55
   4   2   2   13.07    0.59
   4  -2  -2   12.58    0.58
  -4  -2   2   13.14    0.66
   4   2   2   12.91    0.61
   4   2   2   12.95    0.60
  -4  -2   2   12.46    0.44
   4  -2  -2   12.35    0.53
  -4   2  -2   12.32    0.49
   4  -3   2  120.86    3.64
  -4   3   2  122.37    3.66
   4  -3   2  122.26    3.75
  -4  -3  -2  115.29    3.71
   4   3  -2  119.35    3.72
  -4   3   2  123.69    3.57
   4   3   2  118.38    3.69
  -4  -3   2  120.88    3.61
   4  -3  -2  120.99    3.55
   4   3   2  112.00    3.65
  -4   3  -2  121.87    3.70
   4  -3  -2  123.83    3.71
   4   3   2  120.95    3.72
  -4   3  -2  122.97    3.62
  -4  -3   2  118.79    3.58
  -4  -3   2  123.97    3.75
   4   4  -2    4.91    0.55
  -4  -4  -2    3.91    0.42
   4  -4   2    4.40    0.52
  -4  -4  -2    4.40    0.41
  -4   4   2    2.93    0.41
   4   4   2    3.68    0.50
  -4   4  -2    4.59    0.38
  -4   4  -2    4.43    0.42
  -4   4  -2    0.76    0.53
   4  -4  -2    3.65    0.48
  -4  -4   2    4.61    0.39
  -4  -4   2    3.27    0.49
  -4   5   2    3.33    0.50
  -4  -5  -2    3.86    0.48
   4  -5   2    4.91    0.62
  -4  -5  -2    3.31    0.47
   4   5  -2    2.98    0.59
  -4  -5   2    3.29    0.64
  -4   5  -2    3.62    0.49
  -4  -5   2    3.77    0.45
   4  -5  -2    3.95    0.56
   4   5   2    3.65    0.60
  -4   5  -2    3.41    0.40
  -4   6   2    8.63    0.76
   4   6  -2    6.74    0.77
  -4  -6  -2    8.65    0.75
  -4  -6  -2    7.80    0.66
   4  -6   2    8.51    0.86
  -4   6  -2    7.45    0.70
  -4  -6   2    8.07    0.88
   4   6   2    8.55    0.81
  -4  -6   2    8.67    0.71
   4  -6  -2    8.19    0.78
  -4   6  -2    8.38    0.57
  -4   7   2    1.25    0.63
  -4  -7  -2    1.16    0.60
   4  -7   2    1.36    0.69
   4   7  -2    1.34    0.73
  -4   7  -2    1.64    0.66
  -4  -7   2    2.01    0.85
   4  -7  -2    2.13    0.71
   4   7   2    1.79    0.74
  -4  -7   2    1.90    0.65
  -4  -8  -2    4.82    0.90
   4   8  -2    3.54    0.97
   4  -8   2    4.71    1.01
  -4   8   2    3.56    0.86
   4   8   2    5.08    1.00
   4  -8  -2    4.21    0.95
  -4   8  -2    2.76    0.83
  -4  -8   2    4.16    0.89
   4   9  -2    2.36    1.20
  -4   9   2    2.24    1.70
  -4  -9  -2    2.18    1.02
  -4   9  -2    2.37    1.00
   4   9   2    2.67    1.10
   4  -9  -2    2.00    1.07
  -4   0  -3  273.84    8.30
   4   0  -3  286.24    8.10
   4   0  -3  275.25    8.20
  -4   0  -3  276.47    8.23
   4   0  -3  258.31    8.18
   4   0  -3  284.27    8.11
  -4   0   3  285.37    8.23
   4   0   3  296.35    8.24
   4   0   3  276.47    8.19
  -4   1   3   86.10    2.58
  -4  -1  -3   81.52    2.61
   4  -1   3   89.39    2.78
   4   1  -3   75.47    2.67
  -4   1   3   72.56    2.54
   4  -1   3   82.51    2.47
   4   1  -3   83.00    2.63
  -4  -1  -3   82.36    2.53
  -4  -1  -3   88.93    2.67
  -4   1   3   88.65    2.61
   4  -1   3   83.10    2.61
   4   1   3   82.65    2.60
  -4   1  -3   79.25    2.66
  -4   1  -3   89.34    2.67
   4   1   3   83.92    2.53
   4  -1  -3   90.59    2.65
  -4   1  -3   88.59    2.47
   4  -1  -3   87.14    2.57
  -4  -1   3   86.25    2.63
   4   1   3   86.87    2.62
  -4  -1   3   85.81    2.67
   4   2  -3  279.88    8.00
  -4   2   3  258.19    7.95
  -4   2   3  267.46    7.93
  -4   2   3  270.94    7.91
   4  -2   3  274.23    8.08
  -4  -2  -3  269.83    7.93
   4  -2   3  264.58    7.86
   4  -2  -3  268.71    7.89
   4   2   3  275.99    7.99
  -4   2  -3  275.82    7.85
   4   2   3  260.12    7.93
   4   2   3  267.22    7.92
  -4   2  -3  281.02    7.96
  -4  -2   3  269.19    8.04
   4   3  -3   19.62    0.89
   4  -3   3   20.00    0.98
  -4  -3  -3   21.08    0.84
   4   3  -3   17.19    0.67
  -4   3   3   18.04    0.68
  -4   3   3   18.66    0.78
   4  -3   3   14.42    0.75
   4   3   3   18.30    0.83
   4   3   3   18.57    0.88
  -4  -3   3   19.08    0.95
  -4   3  -3   19.36    0.72
   4  -3  -3   18.22    0.67
  -4  -3   3   18.12    0.69
   4   3   3   18.00    0.81
  -4   3  -3   18.59    0.78
   4  -3  -3   19.68    0.85
  -4  -4  -3  101.18    3.23
  -4   4   3  104.97    3.28
  -4  -4  -3  109.79    3.33
   4  -4   3  108.72    3.42
   4   4  -3  108.49    3.36
   4   4  -3  100.10    3.19
  -4  -4   3  101.95    3.20
  -4   4  -3  103.93    3.22
  -4   4  -3  106.57    3.24
   4  -4  -3  102.27    3.35
   4   4   3  108.43    3.32
   4   5  -3   27.25    1.24
  -4  -5  -3   25.06    1.04
  -4   5   3   22.79    1.12
  -4  -5  -3   26.10    1.15
   4  -5   3   23.95    1.24
  -4  -5   3   25.46    1.33
  -4  -5   3   22.95    1.06
  -4   5  -3   25.54    1.07
   4   5   3   26.87    1.18
  -4   5  -3   24.95    1.04
   4  -5  -3   24.33    1.19
   4   6  -3    4.52    0.72
  -4  -6  -3    4.57    0.61
   4  -6   3    4.20    0.71
  -4   6   3    4.35    0.64
  -4   6  -3    4.04    0.59
  -4   6  -3    4.23    0.53
   4   6   3    3.76    0.69
  -4  -6   3    4.45    0.82
   4  -6  -3    4.82    0.68
  -4  -6   3    3.92    0.61
   4  -7   3    4.56    0.85
   4   7  -3    5.77    0.88
  -4  -7  -3    6.98    0.81
  -4   7   3    6.73    0.82
  -4  -7   3    5.43    0.79
   4  -7  -3    5.81    0.85
  -4   7  -3    5.26    0.75
   4   7   3    4.70    0.86
  -4  -7   3    5.73    0.98
   4  -8   3    5.13    1.03
   4   8  -3    4.96    1.01
  -4  -8  -3    4.51    0.87
  -4   8   3    5.44    0.91
   4   8   3    4.52    0.97
  -4   8  -3    6.08    0.92
   4  -8  -3    5.78    0.97
  -4  -9  -3    1.35    1.01
   4   9  -3    2.05    1.13
   4  -9   3    1.23    1.49
  -4   9   3    3.04    1.03
   4  -9  -3    1.77    1.08
  -4   9  -3    1.39    1.02
   4   9   3    2.95    1.13
   4   0  -4    5.20    0.49
   4   0   4    4.14    0.39
   4   0  -4    5.51    0.41
  -4   0  -4    5.01    0.37
   4   0  -4    5.69    0.32
  -4   0   4    5.41    0.44
   4   0  -4    5.36    0.30
   4  -1   4  170.29    5.24
  -4   1   4  177.10    5.15
  -4   1   4  170.36    5.18
  -4  -1  -4  175.40    5.16
   4   1  -4  174.34    5.04
   4   1  -4  165.91    5.19
  -4  -1  -4  167.97    5.07
  -4   1  -4  177.35    5.18
   4  -1  -4  174.77    5.12
   4  -1  -4  168.06    5.15
   4   1   4  175.15    5.20
  -4  -1   4  181.50    5.26
   4   1   4  171.23    5.06
   4  -2   4   77.74    2.31
   4   2  -4   79.77    2.48
  -4   2   4   79.12    2.41
  -4  -2  -4   78.66    2.42
  -4  -2  -4   73.25    2.39
   4   2  -4   72.66    2.27
   4  -2   4   80.01    2.57
   4   2   4   75.82    2.38
   4  -2  -4   77.96    2.44
  -4   2  -4   78.18    2.45
  -4   2  -4   77.09    2.29
  -4  -2   4   74.78    2.28
   4   2   4   81.17    2.50
   4   3  -4   24.08    1.08
  -4  -3  -4   25.21    0.98
   4  -3   4   25.83    1.24
   4   3  -4   23.55    0.86
  -4   3   4   26.78    0.99
  -4   3   4   26.17    0.91
   4   3   4   24.91    1.10
  -4   3  -4   24.76    1.01
   4  -3  -4   25.53    1.05
   4  -3  -4   24.18    0.87
  -4  -3   4   25.41    0.89
  -4   3  -4   24.84    0.88
   4   3   4   25.08    0.99
  -4  -4  -4   36.99    1.35
  -4   4   4   37.68    1.40
   4   4  -4   39.27    1.50
   4  -4   4   39.03    1.64
  -4  -4   4   38.22    1.60
  -4  -4   4   38.34    1.33
   4   4   4   38.26    1.57
  -4   4  -4   38.25    1.40
   4  -4  -4   38.90    1.48
   4   4   4   37.57    1.42
  -4   4  -4   36.04    1.31
  -4  -5  -4   35.55    1.47
   4  -5   4   38.63    1.67
   4   5  -4   35.69    1.53
  -4  -5  -4   37.60    1.35
  -4   5   4   35.21    1.42
  -4   5  -4   36.49    1.40
  -4  -5   4   37.26    1.64
   4  -5  -4   36.81    1.53
  -4  -5   4   37.57    1.40
   4   5   4   35.47    1.50
  -4   5  -4   34.29    1.36
   4   6  -4    1.25    0.63
   4  -6   4    1.23    0.67
  -4  -6  -4    0.74    0.51
  -4   6   4    0.57    0.53
  -4  -6   4    0.80    0.76
  -4   6  -4    0.71    0.48
   4   6   4    1.61    0.63
   4  -6  -4    1.39    0.58
  -4  -6   4    0.99    0.56
  -4   6  -4    1.51    0.54
  -4   7   4   13.24    1.02
   4  -7   4   14.82    1.23
   4   7  -4   15.66    1.17
  -4  -7  -4   15.16    1.12
  -4   7  -4   15.24    1.11
   4  -7  -4   15.95    1.31
   4   7   4   16.56    1.15
  -4  -7   4   15.84    1.30
   4  -8   4    1.90    1.02
  -4  -8  -4    0.85    0.79
  -4   8   4    0.90    0.82
   4   8  -4    1.85    0.95
   4  -8  -4    1.67    0.85
  -4   8  -4    1.37    0.82
   4   8   4    2.50    0.94
  -4   9   4   16.25    1.38
   4   9  -4   14.18    1.50
  -4  -9  -4   15.08    1.64
   4  -9   4   13.55    1.61
  -4   9  -4   15.93    1.39
   4   9   4   15.21    1.47
   4  -9  -4   14.37    1.44
  -4   0   5  187.35    5.62
  -4   0  -5  183.37    5.54
   4   0  -5  177.85    5.44
   4   0   5  190.17    5.59
   4   0  -5  186.76    5.56
   4   0  -5  185.35    5.44
   4  -1   5   12.85    0.76
  -4  -1  -5   15.15    0.69
  -4  -1  -5   14.24    0.58
  -4   1   5   13.50    0.76
   4   1  -5   14.69    0.58
  -4   1   5   14.18    0.65
   4   1  -5   16.56    0.76
  -4   1  -5   15.08    0.72
   4  -1  -5   15.58    0.65
   4  -1  -5   15.03    0.70
   4   1   5   13.63    0.54
  -4  -1   5   13.25    0.85
   4   1   5   14.89    0.74
  -4  -1   5   14.93    0.57
  -4  -2  -5   36.59    1.27
   4   2  -5   33.63    1.13
   4  -2   5   35.22    1.43
   4   2  -5   37.15    1.34
  -4   2   5   37.43    1.26
  -4   2   5   36.01    1.29
  -4  -2  -5   35.07    1.25
   4  -2   5   37.08    1.11
  -4  -2   5   36.63    1.13
   4   2   5   36.30    1.36
   4  -2  -5   33.63    1.26
  -4   2  -5   34.75    1.09
   4  -2  -5   38.03    1.30
  -4  -2   5   35.85    1.45
   4   2   5   36.25    1.21
  -4   2  -5   35.15    1.31
  -4  -3  -5    2.10    0.35
   4   3  -5    1.32    0.43
   4  -3   5    1.46    0.51
   4   3  -5    1.31    0.28
  -4   3   5    1.62    0.33
  -4   3   5    1.64    0.34
   4  -3   5    1.59    0.34
   4  -3  -5    1.33    0.36
  -4  -3   5    1.59    0.25
   4   3   5    2.93    0.39
  -4   3  -5    1.60    0.37
   4   3   5    1.75    0.45
  -4  -3   5    2.36    0.57
   4  -3  -5    1.42    0.30
  -4   3  -5    1.18    0.25
   4  -4   5    5.97    0.76
  -4  -4  -5    6.18    0.52
   4   4  -5    4.53    0.59
  -4   4   5    5.55    0.54
  -4   4  -5    6.32    0.55
   4   4   5    5.08    0.55
  -4  -4   5    5.63    0.74
   4  -4  -5    4.77    0.55
  -4  -4   5    5.61    0.49
   4   4   5    5.23    0.67
  -4   4  -5    6.00    0.45
   4   5  -5    1.56    0.58
   4  -5   5    2.03    0.72
  -4  -5  -5    2.32    0.52
  -4  -5  -5    2.23    0.42
   4  -5  -5    2.54    0.56
  -4  -5   5    2.24    0.71
  -4   5  -5    2.38    0.50
  -4  -5   5    2.52    0.54
   4   5   5    2.32    0.56
  -4   5  -5    1.66    0.45
  -4   6   5    8.54    0.78
   4   6  -5    6.54    0.82
  -4  -6  -5    8.62    0.83
   4  -6   5    6.57    0.94
   4   6   5    7.75    0.82
  -4   6  -5    7.86    0.72
  -4  -6   5    6.88    0.76
   4  -6  -5    5.76    0.78
  -4   6  -5    8.70    0.74
  -4  -6   5    7.52    1.00
   4  -7   5   10.70    1.22
  -4   7   5   12.35    1.01
   4   7  -5   13.13    1.11
  -4  -7  -5   13.08    1.09
  -4  -7   5   13.25    1.28
  -4   7  -5   13.18    0.97
   4   7   5    9.62    1.01
   4  -7  -5   11.58    1.06
  -4  -8  -5    1.35    0.84
  -4   8   5    1.95    0.82
   4   8  -5    1.78    0.96
   4  -8   5    2.19    1.15
   4   8   5    0.95    0.92
  -4   8  -5    2.18    0.87
   4  -8  -5    1.24    0.89
   4   0  -6   84.91    2.66
  -4   0   6   85.83    2.69
  -4   0   6   88.12    2.84
  -4   0  -6   87.05    2.75
   4   0   6   85.64    2.81
   4   0  -6   87.92    2.77
   4  -1   6  400.36   11.71
  -4   1   6  405.23   11.68
  -4   1   6  406.90   11.61
  -4  -1  -6  393.54   11.62
   4   1  -6  374.82   11.52
   4   1  -6  374.20   11.64
  -4  -1  -6  380.66   11.48
   4   1   6  405.78   11.47
  -4   1  -6  403.72   11.66
   4   1   6  401.80   11.68
  -4  -1   6  398.21   11.51
   4  -1  -6  400.16   11.58
  -4  -1   6  399.82   11.75
   4   2  -6   59.13    1.91
  -4   2   6   63.73    2.02
  -4  -2  -6   58.14    1.97
  -4  -2  -6   61.77    2.02
   4   2  -6   65.13    2.11
   4  -2   6   57.12    2.16
  -4   2   6   63.57    2.06
  -4  -2   6   57.62    2.19
   4   2   6   62.85    2.13
   4  -2  -6   64.01    2.05
  -4  -2   6   62.05    1.89
   4   2   6   61.79    1.94
  -4   2  -6   62.58    2.08
  -4   3   6  150.57    4.50
  -4  -3  -6  152.25    4.53
   4   3  -6  157.21    4.63
  -4   3   6  143.61    4.54
   4  -3   6  145.40    4.72
   4  -3  -6  150.48    4.60
  -4  -3   6  146.11    4.41
   4   3   6  150.37    4.69
  -4   3  -6  146.02    4.39
  -4  -3   6  145.62    4.74
  -4   3  -6  144.95    4.59
   4   3   6  153.46    4.51
  -4   4   6   67.28    2.26
   4   4  -6   69.76    2.36
   4  -4   6   65.88    2.52
  -4  -4  -6   66.75    2.23
  -4  -4   6   67.61    2.16
   4   4   6   66.92    2.47
   4   4   6   67.72    2.26
  -4   4  -6   64.43    2.20
   4  -4  -6   68.51    2.36
  -4  -4   6   67.03    2.51
  -4   4  -6   67.34    2.30
  -4  -5  -6    2.90    0.58
   4   5  -6    2.33    0.67
  -4  -5  -6    2.35    0.46
   4  -5   6    2.10    0.80
  -4   5   6    2.12    0.54
   4   5   6    2.33    0.57
  -4   5  -6    2.17    0.55
  -4  -5   6    2.93    0.52
  -4   5  -6    2.70    0.48
  -4  -5   6    1.68    0.76
   4  -5  -6    1.94    0.58
   4   6  -6    7.00    0.86
   4  -6   6    8.15    1.09
  -4  -6  -6    7.94    0.84
  -4   6   6    6.67    0.75
   4   6   6    6.71    0.80
  -4   6  -6    8.25    0.73
   4  -6  -6    7.87    0.87
  -4  -6   6    6.95    1.05
  -4   6  -6    7.77    0.77
  -4   7   6    1.85    0.70
   4   7  -6    3.01    0.86
  -4  -7  -6    2.81    0.77
   4  -7   6    0.92    1.02
  -4   7  -6    1.56    0.73
   4   7   6    1.43    0.79
   4  -7  -6    1.73    0.80
  -4  -7   6    2.22    1.09
   4   8  -6    8.85    1.21
   4  -8   6    8.07    1.44
  -4   8   6    8.55    1.14
  -4  -8  -6    9.34    1.20
   4   8   6    7.48    1.10
   4  -8  -6    7.61    1.22
  -4   0   7    9.00    0.74
   4   0  -7    8.37    0.63
   4   0  -7    9.21    0.65
   4   0   7    7.50    0.63
  -4   0  -7    8.36    0.66
   4  -1   7   50.97    1.83
   4   1  -7   45.62    1.76
  -4   1   7   50.38    1.71
  -4   1   7   50.44    1.83
   4   1  -7   46.48    1.67
  -4  -1  -7   50.78    1.75
  -4  -1  -7   47.86    1.58
   4   1   7   50.48    1.53
  -4  -1   7   52.09    1.64
  -4   1  -7   49.49    1.77
   4   1   7   50.42    1.81
  -4  -1   7   49.70    1.90
   4  -1  -7   51.03    1.70
   4   2  -7   12.92    0.83
  -4  -2  -7   10.71    0.71
  -4   2   7   11.67    0.81
   4  -2   7   11.34    0.87
  -4   2   7   11.33    0.67
   4   2   7   10.44    0.86
  -4  -2   7   12.11    0.61
  -4   2  -7   11.55    0.80
   4   2   7   12.55    0.75
  -4  -2   7   12.65    1.00
   4  -2  -7   11.67    0.73
  -4   3   7    7.83    0.62
   4   3  -7    8.47    0.71
  -4  -3  -7    8.68    0.60
  -4   3   7    8.69    0.62
   4  -3   7    8.81    0.82
   4   3   7    7.05    0.71
  -4   3  -7    7.07    0.64
  -4  -3   7    7.54    0.53
   4   3   7    8.32    0.57
  -4   3  -7    7.29    0.50
  -4  -3   7    7.69    0.85
   4  -3  -7    8.25    0.66
  -4   4   7    8.82    0.76
  -4  -4  -7   10.13    0.76
   4   4  -7    9.90    0.81
   4  -4   7    8.24    0.89
   4   4   7   10.76    0.73
   4  -4  -7   11.05    0.85
  -4   4  -7    9.49    0.75
  -4  -4   7    9.81    0.64
   4   4   7   10.91    1.22
  -4  -4   7   12.32    1.06
   4  -5   7    0.58    0.69
   4   5  -7    0.78    0.61
  -4  -5  -7    0.08    0.52
  -4   5   7    0.64    0.49
   4   5   7    0.67    0.56
   4  -5  -7    0.36    0.57
  -4  -5   7    0.57    0.79
  -4   6   7    4.66    0.70
  -4  -6  -7    4.37    0.74
   4  -6   7    4.74    1.01
   4   6  -7    5.82    0.84
   4  -6  -7    4.78    0.80
  -4  -6   7    5.63    1.05
  -4   6  -7    5.67    0.78
   4   6   7    5.66    0.79
   4  -7   7    9.16    1.32
  -4   7   7    9.02    0.94
   4   7  -7   11.21    1.13
  -4  -7  -7    9.96    1.07
  -4  -7   7   10.61    1.34
  -4   7  -7   10.06    1.01
   4   7   7    8.28    1.00
   4  -7  -7   10.46    1.13
  -4   8   7    5.61    0.97
   4  -8   7    4.79    1.42
   4   8  -7    7.56    1.21
  -4  -8   7    6.12    1.45
   4   8   7    7.07    1.16
   4  -8  -7    6.95    1.18
   4   0   8    2.26    0.51
   4   0  -8    3.32    0.48
  -4   0   8    2.08    0.57
  -4   0   8    1.59    0.45
  -4   0  -8    2.97    0.48
  -4  -1  -8  158.33    4.69
  -4   1   8  150.50    4.66
   4   1  -8  145.98    4.70
   4  -1   8  155.00    4.77
  -4   1   8  152.51    4.77
  -4  -1   8  150.77    4.59
   4   1   8  146.59    4.46
  -4   1  -8  150.50    4.72
   4   1   8  152.49    4.77
  -4  -1   8  147.97    4.84
   4  -1  -8  158.25    4.64
  -4   2   8   34.59    1.33
   4   2  -8   36.28    1.44
  -4   2   8   32.52    1.45
   4  -2   8   35.29    1.54
  -4  -2  -8   35.25    1.38
   4  -2  -8   36.59    1.41
   4   2   8   36.74    1.21
  -4  -2   8   34.47    1.64
   4   2   8   33.22    1.51
  -4   2  -8   34.38    1.46
  -4   3   8   88.90    2.82
  -4  -3  -8   84.31    2.80
   4  -3   8   81.37    2.99
   4   3  -8   86.49    2.91
  -4   3   8   89.87    2.84
   4  -3  -8   88.49    2.90
   4   3   8   88.92    3.22
  -4  -3   8   74.10    3.23
   4   3   8   87.07    2.73
  -4   3  -8   88.21    2.92
  -4  -3   8   89.60    2.81
   4  -4   8    5.22    0.79
   4   4  -8    5.89    0.70
  -4   4   8    5.26    0.62
  -4  -4  -8    5.12    0.58
  -4  -4   8    4.49    0.87
   4   4   8    4.71    0.81
   4   4   8    6.84    0.64
  -4   4  -8    6.74    0.74
   4  -5   8   15.88    1.23
   4   5  -8   16.58    1.11
  -4  -5  -8   15.76    1.14
  -4   5   8   16.38    1.07
  -4   5  -8   16.17    1.19
   4   5   8   17.57    1.23
  -4  -5   8   17.40    1.38
   4  -5  -8   15.44    1.20
   4  -6   8    7.33    1.10
  -4   6   8    8.19    0.86
  -4  -6  -8    8.27    0.96
   4   6  -8    9.26    0.98
   4   6   8    9.33    0.91
  -4  -6   8    8.49    1.21
  -4   6  -8    9.16    0.95
   4  -6  -8    8.20    0.98
  -4   7   8   12.53    1.06
  -4  -7  -8   14.38    1.28
   4  -7   8   16.17    1.49
   4   7  -8   16.32    1.31
  -4  -7   8   11.37    1.49
  -4   7  -8   17.06    1.26
   4   7   8   13.42    1.18
   4  -7  -8   17.06    1.36
  -4  -8  -8    8.91    1.27
  -4   8   8    7.28    1.08
   4  -8   8    6.42    1.64
   4   8  -8    9.15    2.34
   4  -8  -8    9.49    1.32
   4   8   8    9.51    1.93
  -4  -8   8    7.90    1.57
  -4   0  -9   61.60    2.19
  -4   0   9   58.65    2.31
   4   0  -9   63.55    2.17
  -4   0   9   62.43    2.17
   4   0   9   61.76    2.25
   4  -1   9   24.73    1.28
  -4   1   9   22.36    1.23
   4   1  -9   21.51    1.14
  -4   1   9   22.70    1.08
  -4  -1  -9   21.98    1.12
  -4  -1   9   22.19    1.35
  -4   1  -9   23.67    1.18
  -4  -1   9   23.09    1.08
   4   2  -9   15.64    1.00
   4  -2   9   13.89    1.03
  -4   2   9   14.13    1.05
  -4  -2  -9   14.23    0.93
  -4   2   9   15.74    0.90
  -4  -2   9   22.99    1.94
   4  -2  -9   13.91    0.93
   4   2   9   15.05    0.72
  -4  -2   9   15.00    0.86
   4   2   9   15.42    1.19
  -4   2  -9   14.83    1.17
   4   3  -9    1.62    0.58
  -4   3   9    2.25    0.60
   4  -3   9    2.42    0.65
  -4   3   9    2.13    0.54
  -4  -3  -9    2.48    0.52
   4   3   9    1.94    0.68
  -4  -3   9    1.74    0.74
   4   3   9    2.40    0.44
   4  -3  -9    2.52    0.59
  -4   3  -9    2.58    0.60
  -4  -4  -9    0.66    0.52
   4   4  -9    1.42    0.71
  -4   4   9    1.23    0.51
   4  -4   9    0.49    0.65
   4   4   9    0.53    0.50
   4   4   9    0.69    0.75
  -4   4  -9    0.41    0.59
   4  -4  -9    0.46    0.57
  -4  -4   9    0.51    0.83
   4   5  -9    0.66    0.66
  -4   5   9    0.70    0.58
   4  -5   9    0.65    0.76
   4  -5  -9    0.62    0.68
  -4  -5   9    0.32    0.92
   4   5   9    0.27    0.60
  -4   5  -9    0.44    0.66
   4   6  -9    7.13    0.99
   4  -6   9    5.54    1.11
  -4  -6  -9    5.11    0.94
  -4   6   9    6.36    0.86
  -4  -6   9    4.73    1.20
  -4   6  -9    5.43    0.91
   4   6   9    5.68    0.86
   4  -6  -9    6.78    0.99
   4   7  -9    0.99    0.96
  -4   7   9    1.02    1.57
   4  -7   9    1.73    1.16
  -4  -7   9    1.33    1.30
   4   7   9    2.62    0.91
  -4   7  -9    1.23    0.91
   4  -7  -9    1.37    1.20
  -4   0  10   39.41    1.63
   4   0  10   41.11    1.71
   4   0 -10   37.17    1.56
  -4   0  10   32.78    1.72
  -4   0 -10   37.01    1.63
   4   1 -10  114.61    3.86
  -4   1  10  121.06    3.93
   4  -1  10  120.91    3.96
  -4   1  10  122.32    4.00
  -4  -1 -10  117.49    4.36
   4   1  10  118.70    3.99
  -4  -1  10  120.90    4.09
  -4   1 -10  118.97    3.92
  -4  -1  10  124.44    3.81
   4   2 -10   10.59    0.87
   4  -2  10   11.93    0.98
  -4  -2 -10   10.03    0.79
  -4   2  10   10.23    0.92
  -4   2 -10    9.65    0.87
  -4  -2  10    9.99    1.08
   4   2  10    8.31    0.93
   4  -2 -10   10.24    0.83
  -4  -2  10    9.91    0.89
   4  -3  10   49.58    2.06
   4   3 -10   47.94    2.00
  -4   3  10   49.67    1.85
  -4   3  10   48.01    1.96
  -4  -3 -10   48.48    1.85
   4  -3 -10   50.03    1.96
   4   3  10   46.20    2.11
  -4  -3  10   47.16    2.20
  -4   3 -10   46.70    1.98
  -4  -4 -10    6.65    0.75
   4  -4  10    4.82    0.87
   4   4 -10    6.66    0.84
  -4   4  10    6.49    0.74
  -4   4 -10    6.19    0.85
   4  -4 -10    7.32    0.87
  -4  -4  10    7.30    1.13
   4   4  10    5.90    1.02
   4   4  10    7.71    0.73
  -4   5  10   12.66    0.99
   4   5 -10   12.12    1.07
   4  -5  10   11.46    1.16
   4   5  10   13.69    1.42
  -4   5 -10   11.23    1.08
  -4  -5  10   10.64    1.37
   4   5  10   13.82    0.98
   4  -5 -10   10.89    1.10
   4  -6  10    0.70    0.95
  -4  -6 -10    0.60    0.86
  -4   6  10    0.44    0.74
   4   6 -10    1.09    0.90
  -4  -6  10    0.56    1.17
  -4   6 -10    0.50    0.86
   4   6  10    0.52    0.79
   4  -6 -10    0.79    0.88
   4   7 -10    3.25    1.14
  -4   7  10    2.05    0.91
  -4  -7 -10    1.80    0.96
   4  -7 -10    1.42    1.05
   4   7  10    1.50    1.00
  -4   7 -10    1.68    1.05
   4   0  11   41.33    1.86
  -4   0 -11   40.44    1.79
  -4   0  11   43.42    1.97
   4   0 -11   40.21    1.74
  -4   0  11   42.96    1.82
  -4  -1 -11    5.73    0.75
   4  -1  11    4.82    0.80
  -4   1  11    6.71    0.93
  -4   1  11    5.71    0.89
   4   1 -11    5.48    0.74
  -4  -1  11    3.78    0.91
   4   1  11    4.74    0.82
   4  -1 -11    5.01    0.81
  -4   1 -11    6.45    0.80
  -4  -1  11    5.87    0.78
  -4  -2 -11   26.54    1.35
  -4   2  11   26.11    1.55
  -4   2  11   27.71    1.35
   4  -2  11   27.28    1.56
  -4  -2  11   27.65    1.75
   4   2  11   26.11    1.60
  -4   2 -11   27.87    1.50
  -4   3  11    1.48    0.59
   4   3 -11    2.05    0.73
   4  -3  11    2.95    0.79
  -4  -3 -11    2.69    0.65
  -4   3 -11    2.44    0.75
  -4  -3  11    1.84    0.97
   4  -3 -11    2.63    0.72
   4   3  11    2.08    0.89
  -4   4  11    5.38    0.73
   4   4 -11    6.02    0.87
   4  -4  11    5.59    0.94
   4  -4 -11    7.43    0.95
  -4   4 -11    4.79    0.90
  -4  -4  11    5.23    1.18
   4   4  11    6.06    1.13
   4   5 -11    2.01    0.85
   4  -5  11    1.35    0.92
  -4   5  11    1.53    0.75
   4  -5 -11    1.37    0.87
  -4   5 -11    1.26    0.85
   4   5  11    1.22    1.14
  -4  -5  11    2.10    1.21
  -4   6  11    2.84    1.02
   4  -6  11    3.21    1.11
  -4  -6 -11    2.79    1.03
   4   6 -11    2.13    1.02
   4  -6 -11    5.29    1.37
  -4   6 -11    2.26    1.02
  -4   0 -12    6.99    0.88
   4   0  12    5.60    0.90
   4   0 -12    6.77    0.87
  -4   0  12    7.59    1.08
  -4   0  12    7.23    0.99
  -4   1  12   17.40    1.35
  -4  -1 -12   17.46    1.26
   4   1 -12   15.86    1.13
   4  -1  12   19.93    1.43
   4  -1 -12   17.59    1.23
   4   1  12   15.00    1.25
  -4   1 -12   15.93    1.19
  -4  -1  12   15.11    1.39
   4  -2  12    7.59    1.01
  -4   2  12    8.66    1.08
  -4   2  12    7.52    0.86
   4   2 -12    8.56    0.94
  -4  -2 -12    8.12    0.85
   4  -2 -12    8.41    0.92
  -4   2 -12    7.67    0.94
  -4  -2  12    9.78    1.25
   4   2  12    7.34    1.08
  -4   3  12   21.85    1.33
   4   3 -12   22.70    1.48
   4  -3  12   23.54    1.62
  -4  -3 -12   24.21    1.41
   4   3  12   22.18    1.84
   4  -3 -12   24.49    1.53
  -4  -3  12   20.19    1.62
  -4   3 -12   22.14    1.61
  -4   4  12    0.01    0.67
   4  -4  12    0.45    0.87
   4   4 -12   -0.49    0.80
  -4   4 -12   -0.12    0.83
   4  -4 -12    0.11    0.84
  -4  -4  12   -0.42    1.15
   4   4  12   -0.07    1.07
  -4   5  12   10.21    1.04
   4  -5  12   10.20    1.26
  -4   5 -12   11.32    1.54
  -4   0  13   40.43    2.26
   4   0  13   40.72    2.06
  -4   0 -13   42.38    2.00
   4   0 -13   41.39    1.97
   4   1 -13   41.39    1.94
   4  -1  13   43.90    2.08
  -4  -1 -13   42.90    1.96
  -4   1  13   40.41    2.22
  -4   1 -13   41.66    2.03
   4   1  13   38.24    2.14
   4  -1 -13   38.38    1.88
  -4  -1  13   40.84    2.28
  -4  -2 -13   66.36    2.60
   4  -2  13   69.26    2.81
   4  -2 -13   62.62    2.67
   4  -2 -13   70.38    2.68
   4   2  13   70.58    2.89
   4  -2 -13   64.94    2.62
  -4  -2  13   65.94    3.02
  -4   2 -13   68.30    2.75
   4  -3  13    6.05    1.11
  -4   3  13    5.23    0.89
  -4  -3 -13    5.05    0.91
   4   3  13    4.93    1.22
   4  -3 -13    6.35    1.05
  -4   3 -13    5.13    1.01
  -4  -3  13    5.11    1.33
  -4   4  13   17.00    1.27
   4  -4  13   18.29    1.52
  -4  -4  13   19.25    1.82
   4  -4 -13   23.20    1.58
  -4   4 -13   21.35    1.58
   4   4  13   15.52    1.71
  -4   0 -14    6.19    1.06
   4   0  14    6.41    1.16
  -4   0  14    5.77    1.29
  -4  -1 -14   10.28    1.15
   4  -1  14   11.30    1.30
  -4  -1  14   11.46    1.45
  -4   1 -14   12.56    1.28
   4   1  14    6.91    1.30
   4  -2  14    9.51    1.23
  -4  -2 -14    6.40    1.00
  -4   2 -14   10.12    2.05
   4  -2 -14    8.53    1.15
   4  -3  14    4.76    1.31
  -4   3  14    4.39    1.03
  -4   3 -14    4.93    1.18
   4  -3 -14    5.39    1.18
   4   3  14    4.96    1.38
  -4  -3  14    2.74    1.37
  -4   0 -15   72.62    3.04
   4   0  15   69.88    3.18
   4  -1  15    9.26    1.39
   4   1  15   10.41    1.53
  -4  -1  15    9.19    1.57
  -5   0   0   -0.11    0.15
   5   0   0    0.19    0.22
   5   0   0    0.23    0.20
   5   0   0   -0.04    0.18
  -5   0   0    0.14    0.19
   5   0   0    0.25    0.21
  -5   1   0   25.08    0.97
   5   1   0   27.79    0.97
  -5   1   0   27.32    0.89
   5   1   0   27.34    0.87
   5  -1   0   28.12    0.97
  -5  -1   0   25.77    0.88
   5  -1   0   24.62    0.94
  -5  -1   0   26.21    0.94
  -5   1   0   26.60    0.96
   5   1   0   25.62    1.00
   5  -2   0   69.73    2.24
  -5  -2   0   71.32    2.25
  -5  -2   0   68.88    2.14
  -5   2   0   72.19    2.20
   5  -2   0   70.19    2.18
  -5   2   0   67.19    2.15
   5   2   0   71.54    2.16
   5   2   0   71.44    2.24
   5  -2   0   70.88    2.18
  -5  -3   0   47.12    1.65
   5  -3   0   46.31    1.54
  -5   3   0   48.59    1.57
  -5   3   0   48.47    1.55
   5  -3   0   47.97    1.67
   5   3   0   46.63    1.65
  -5  -3   0   49.42    1.55
  -5  -4   0  222.11    6.59
   5   4   0  220.42    6.60
  -5  -4   0  221.89    6.51
   5  -4   0  209.81    6.44
   5  -4   0  215.59    6.62
  -5   4   0  220.23    6.52
  -5   4   0  221.23    6.44
   5  -5   0    0.86    0.49
  -5   5   0    0.72    0.41
  -5  -5   0    0.98    0.39
  -5  -5   0    1.39    0.49
  -5   5   0    1.18    0.32
   5   5   0    0.43    0.51
   5   6   0  131.93    4.30
  -5  -6   0  130.84    4.24
  -5  -6   0  134.16    4.22
   5  -6   0  133.98    4.34
  -5   6   0  135.25    4.20
  -5   7   0   25.29    1.31
   5   7   0   26.81    1.54
   5  -7   0   25.56    1.57
  -5  -7   0   28.90    1.41
   5  -8   0   47.50    2.26
  -5  -8   0   47.51    2.11
   5   8   0   49.23    2.27
  -5   8   0   48.42    2.07
  -5   9   0    9.00    1.19
   5  -9   0    7.46    1.27
   5   9   0    9.75    1.31
   5   0   1   -0.01    0.23
   5   0   1    0.41    0.19
   5   0  -1   -0.02    0.19
  -5   0  -1    0.09    0.22
  -5   0   1    0.04    0.13
   5   0  -1   -0.05    0.23
  -5   0   1    0.08    0.18
   5   0  -1    0.18    0.23
  -5   0  -1    0.04    0.20
   5   0   1    0.34    0.21
   5   0  -1   -0.15    0.18
   5   0   1   -0.01    0.17
  -5   1   1   13.26    0.59
   5   1  -1   15.28    0.71
  -5  -1  -1   18.17    0.91
   5   1  -1   13.63    0.47
   5  -1   1   14.04    0.62
   5   1  -1   12.58    0.64
  -5   1   1   13.62    0.55
   5  -1   1   13.86    0.70
  -5   1   1   13.79    0.58
  -5  -1  -1   12.47    0.56
  -5   1  -1   13.85    0.60
   5  -1  -1   13.04    0.57
  -5   1  -1   13.42    0.62
   5   1   1   12.86    0.65
   5  -1  -1   13.95    0.60
   5   1   1   14.73    0.60
  -5  -1   1   13.47    0.49
   5  -1  -1   13.62    0.62
   5   1   1   14.25    0.57
  -5   1  -1   13.56    0.51
  -5  -1   1   13.50    0.64
  -5  -1   1   12.73    0.61
   5  -2   1   30.84    1.19
  -5   2   1   30.34    1.15
  -5  -2  -1   30.97    1.14
  -5   2   1   32.78    1.09
  -5  -2  -1   29.55    1.14
   5  -2   1   31.81    1.08
   5   2  -1   36.51    1.20
  -5   2   1   31.23    1.09
   5  -2   1   30.08    1.11
  -5  -2   1   34.37    1.20
   5  -2  -1   33.27    1.24
  -5   2  -1   31.90    1.05
  -5   2  -1   31.00    1.10
   5   2   1   33.38    1.11
  -5  -2   1   32.31    1.01
   5   2   1   33.17    1.17
  -5  -2   1   32.00    1.01
  -5  -3  -1   18.58    0.83
   5   3  -1   18.01    0.89
   5  -3   1   18.61    0.80
  -5   3   1   19.77    0.74
  -5  -3  -1   18.52    0.83
  -5   3   1   19.22    0.79
   5  -3   1   19.12    0.90
   5  -3  -1   19.54    0.86
  -5  -3   1   20.31    0.73
  -5   3  -1   19.55    0.76
   5   3   1   19.36    0.84
   5  -3  -1   18.44    0.73
  -5  -3   1   20.30    0.92
   5   3   1   19.48    0.87
  -5   3  -1   18.67    0.76
  -5  -3   1   19.75    0.75
  -5  -4  -1   35.81    1.25
  -5   4   1   33.77    1.14
  -5  -4  -1   37.26    1.32
  -5   4   1   35.71    1.26
   5  -4   1   35.33    1.38
   5   4  -1   33.68    1.37
  -5   4  -1   32.90    1.23
   5  -4  -1   33.20    1.15
  -5  -4   1   34.37    1.22
   5  -4  -1   33.95    1.34
  -5   4  -1   32.02    1.35
  -5  -4   1   31.23    1.28
   5   4   1   33.02    1.34
  -5   4  -1   32.98    1.24
  -5  -4   1   33.61    1.36
  -5   5   1   61.66    2.12
  -5  -5  -1   62.37    2.16
  -5  -5  -1   62.49    2.12
  -5   5   1   60.15    1.91
   5  -5   1   64.15    2.24
   5   5  -1   62.36    2.24
  -5  -5   1   63.30    2.09
  -5   5  -1   60.39    2.08
   5  -5  -1   63.16    2.23
  -5  -5   1   61.52    2.22
   5   5   1   62.69    2.21
   5  -6   1   39.01    1.71
  -5   6   1   39.22    2.06
  -5  -6  -1   38.01    1.56
   5   6  -1   38.90    1.68
  -5  -6  -1   40.92    1.61
   5   6   1   36.17    1.70
  -5  -6   1   32.61    1.71
  -5   6  -1   37.68    1.53
  -5  -6   1   37.81    1.54
   5  -6  -1   42.98    1.71
   5   7  -1    3.46    0.82
  -5   7   1    1.77    0.66
   5  -7   1    3.25    0.81
   5   7   1    2.64    0.78
  -5   7  -1    2.72    0.68
   5  -7  -1    2.89    0.76
  -5  -7   1    2.49    1.10
  -5  -7   1    2.26    0.63
  -5  -8  -1   13.19    1.13
   5   8  -1   13.18    1.27
  -5   8   1   13.36    1.12
   5  -8   1   11.21    1.18
  -5   8  -1   12.74    1.08
  -5  -8   1   11.65    1.11
   5   8   1   11.99    1.19
   5  -8  -1   13.81    1.25
  -5  -9  -1    0.65    0.95
   5  -9   1    0.86    1.05
   5   9  -1    1.32    1.10
   5   9   1    0.76    1.11
  -5   9  -1    0.96    0.95
   5  -9  -1    0.92    1.11
  -5   0   2    0.08    0.13
   5   0   2    0.04    0.23
   5   0  -2   -0.26    0.26
   5   0   2    0.22    0.26
   5   0  -2    0.04    0.22
   5   0   2    0.30    0.18
   5   0   2    0.14    0.15
  -5   0  -2   -0.03    0.19
  -5   0  -2   -0.04    0.25
   5   0  -2    0.33    0.14
   5   0  -2    0.05    0.23
  -5   1   2   18.57    0.72
   5  -1   2   18.15    0.77
  -5   1   2   18.41    0.67
  -5  -1  -2   17.11    0.73
  -5  -1  -2   16.85    0.70
  -5  -1  -2   15.48    0.64
   5  -1   2   16.97    0.59
   5   1  -2   16.45    0.74
  -5  -1   2   17.61    0.77
   5  -1  -2   15.76    0.70
   5  -1  -2   16.36    0.65
  -5   1  -2   16.99    0.70
   5   1   2   17.20    0.70
  -5   1  -2   15.71    0.76
   5   1   2   17.66    0.68
  -5   1  -2   17.40    0.60
   5  -2   2   31.30    1.21
  -5  -2  -2   31.19    1.11
  -5   2   2   31.31    1.04
  -5   2   2   29.00    1.09
  -5  -2  -2   28.66    1.08
   5   2  -2   30.54    1.14
  -5  -2  -2   28.52    1.06
  -5   2   2   31.14    1.04
   5  -2   2   28.92    0.99
   5  -2  -2   28.23    1.15
  -5   2  -2   28.92    0.97
   5   2   2   29.81    1.08
  -5   2  -2   28.88    1.05
   5   2   2   27.41    1.12
  -5  -2   2   29.72    1.16
   5  -3   2    5.88    0.46
   5  -3   2    6.05    0.56
  -5   3   2    5.97    0.40
   5   3  -2    4.09    0.49
  -5  -3  -2    6.54    0.48
  -5   3   2    5.94    0.45
  -5  -3   2    5.50    0.36
   5   3   2    5.09    0.46
   5   3   2    5.71    0.50
  -5  -3   2    5.69    0.40
   5  -3  -2    5.25    0.41
  -5   3  -2    5.61    0.41
  -5  -3   2    5.75    0.54
  -5   3  -2    4.97    0.37
   5  -3  -2    4.86    0.45
  -5   4   2   59.06    1.76
  -5  -4  -2   55.84    1.91
   5  -4   2   54.47    2.02
  -5   4   2   57.85    1.91
   5   4  -2   56.12    2.00
  -5  -4  -2   57.84    1.92
  -5   4  -2   55.19    1.85
  -5  -4   2   57.39    1.82
   5   4   2   56.08    1.98
   5  -4  -2   56.86    1.98
   5  -4  -2   58.53    1.79
  -5   4  -2   54.23    1.85
  -5  -4   2   54.55    2.02
  -5  -4   2   56.88    1.88
  -5  -5  -2   67.33    2.29
   5  -5   2   69.37    2.44
  -5  -5  -2   67.69    2.27
   5   5  -2   63.74    2.37
  -5   5   2   70.42    2.28
  -5   5  -2   65.10    2.23
   5  -5  -2   69.69    2.38
  -5  -5   2   68.82    2.42
  -5   5  -2   68.74    2.18
  -5  -5   2   64.69    2.20
   5   5   2   65.31    2.34
  -5  -6  -2   87.75    2.86
   5  -6   2   81.40    2.95
   5   6  -2   83.17    2.92
  -5   6   2   86.63    2.82
  -5  -6  -2   84.93    2.79
  -5  -6   2   83.41    2.97
  -5   6  -2   84.68    2.67
   5  -6  -2   83.95    2.93
   5   6   2   77.11    2.89
  -5   6  -2   81.72    2.76
  -5  -6   2   82.37    2.76
   5  -7   2   23.21    1.48
  -5  -7  -2   25.18    1.37
  -5   7   2   22.80    1.35
   5   7  -2   24.57    1.49
  -5   7  -2   25.05    1.30
   5   7   2   25.67    1.45
  -5  -7   2   24.88    1.64
  -5  -7   2   20.97    1.29
   5  -7  -2   22.16    1.48
   5   8  -2   29.24    1.81
  -5   8   2   29.56    1.60
  -5  -8  -2   29.91    1.72
   5  -8   2   25.42    1.85
  -5   8  -2   30.51    1.59
   5  -8  -2   27.55    1.80
   5   8   2   30.47    1.79
   5  -9   2    2.68    1.15
  -5   9   2    4.31    1.07
  -5  -9  -2    3.81    1.08
   5   9  -2    3.88    1.18
   5   9   2    3.70    1.21
  -5   9  -2    4.15    1.03
   5  -9  -2    3.58    1.16
  -5   0   3    0.00    0.25
   5   0  -3    0.10    0.16
   5   0   3    0.10    0.13
   5   0   3   -0.08    0.25
   5   0   3    0.25    0.17
   5   0  -3   -0.09    0.22
  -5   0  -3    0.04    0.20
   5   0  -3   -0.05    0.13
  -5   1   3   48.09    1.56
   5  -1   3   50.38    1.65
  -5   1   3   49.19    1.52
  -5  -1  -3   45.20    1.54
  -5  -1  -3   44.30    1.45
   5  -1   3   46.71    1.41
   5  -1   3   45.31    1.39
   5   1  -3   44.21    1.57
  -5   1  -3   45.82    1.54
   5   1   3   46.22    1.46
  -5  -1   3   47.24    1.62
   5  -1  -3   45.75    1.48
   5   1   3   45.80    1.56
   5  -1  -3   44.57    1.52
  -5  -2  -3   12.28    0.65
   5   2  -3   11.77    0.68
   5  -2   3   11.20    0.50
  -5   2   3   11.50    0.58
   5  -2   3   11.88    0.82
  -5   2   3   11.93    0.56
  -5  -2  -3    9.40    0.62
   5  -2  -3   10.85    0.58
   5   2   3   10.97    0.58
  -5  -2   3   12.55    0.75
  -5   2  -3   12.18    0.62
   5  -2  -3   11.79    0.60
  -5   2  -3   10.85    0.45
   5   2   3   12.66    0.65
  -5   3   3   79.72    2.53
   5  -3   3   78.96    2.49
   5  -3   3   82.00    2.72
  -5  -3  -3   78.85    2.55
  -5   3   3   78.15    2.46
   5   3  -3   84.85    2.65
   5   3   3   82.26    2.62
   5  -3  -3   76.15    2.45
  -5   3  -3   80.37    2.45
  -5  -3   3   84.27    2.69
   5  -3  -3   79.39    2.58
  -5  -3   3   80.09    2.40
  -5   3  -3   80.35    2.53
  -5  -3   3   80.51    2.40
   5   3   3   79.24    2.55
   5   4  -3   58.61    2.04
  -5   4   3   58.83    1.93
  -5   4   3   57.99    1.77
   5  -4   3   57.15    2.10
  -5  -4  -3   52.84    1.90
   5  -4  -3   54.38    2.00
  -5  -4   3   56.28    1.82
  -5   4  -3   56.15    1.85
  -5   4  -3   58.03    1.90
   5   4   3   55.57    1.98
  -5  -4   3   60.80    2.11
  -5  -5  -3   39.43    1.53
   5  -5   3   40.19    1.71
  -5  -5  -3   39.53    1.48
   5   5  -3   40.19    1.63
  -5   5   3   38.71    1.49
   5  -5  -3   39.92    1.62
  -5  -5   3   39.97    1.75
  -5  -5   3   38.05    1.43
  -5   5  -3   38.48    1.43
   5   5   3   37.17    1.56
  -5   5  -3   37.82    1.43
   5  -6   3    7.48    0.86
   5   6  -3    8.03    0.86
  -5   6   3    8.63    0.78
  -5  -6  -3    8.84    0.77
  -5  -6  -3    7.47    0.84
   5   6   3    8.45    0.84
  -5  -6   3    8.35    0.96
  -5   6  -3    8.32    0.71
  -5   6  -3    9.16    0.67
   5  -6  -3    7.24    0.80
  -5  -6   3    7.42    0.71
   5  -7   3   30.04    1.71
   5   7  -3   27.35    1.65
  -5   7   3   28.20    1.44
  -5  -7  -3   31.10    1.57
  -5   7  -3   29.77    1.42
   5   7   3   29.80    1.67
   5  -7  -3   30.06    1.63
  -5  -7   3   27.23    1.79
   5  -8   3    7.74    1.14
   5   8  -3    7.86    1.16
  -5   8   3    9.43    1.04
  -5  -8  -3    8.97    1.05
   5  -8  -3    8.00    1.13
  -5   8  -3    8.40    0.98
   5   8   3    7.66    1.13
   5   9  -3    7.39    1.34
  -5  -9  -3    5.91    1.18
  -5   9   3    6.26    1.10
   5  -9   3    6.40    1.34
  -5   9  -3    7.41    1.14
   5  -9  -3    6.59    1.26
   5   9   3    7.62    1.27
  -5   0   4   -0.04    0.29
   5   0  -4    0.07    0.17
   5   0  -4    0.15    0.16
   5   0  -4   -0.23    0.26
   5   0   4    0.03    0.11
   5   0   4   -0.17    0.27
  -5   0  -4    0.05    0.23
   5   1  -4    5.99    0.49
   5  -1   4    7.48    0.58
  -5   1   4    5.66    0.46
  -5  -1  -4    5.60    0.38
  -5  -1  -4    6.37    0.46
  -5   1   4    5.89    0.44
   5   1   4    5.79    0.37
  -5   1  -4    5.69    0.44
   5  -1  -4    5.65    0.44
   5  -1  -4    5.32    0.41
  -5  -1   4    5.89    0.52
   5   1   4    5.73    0.47
   5  -1  -4    4.67    0.49
  -5   2   4   75.99    2.38
   5  -2   4   74.40    2.26
  -5  -2  -4   71.09    2.36
   5   2  -4   77.87    2.47
   5  -2   4   78.06    2.56
  -5   2   4   74.67    2.38
  -5  -2  -4   76.70    2.41
   5   2   4   73.30    2.45
  -5  -2   4   77.86    2.54
   5  -2  -4   72.58    2.34
  -5   2  -4   73.93    2.23
   5  -2  -4   78.11    2.40
  -5   2  -4   76.96    2.42
   5   2   4   75.38    2.35
  -5   3   4   61.97    2.06
  -5   3   4   63.17    2.00
   5  -3   4   63.74    2.28
  -5  -3  -4   63.98    2.09
   5   3  -4   63.33    2.16
  -5   3  -4   63.00    2.07
   5   3   4   61.95    2.06
  -5   3  -4   63.20    1.94
  -5  -3   4   63.84    2.25
  -5  -3   4   62.16    1.89
   5  -3  -4   61.86    2.11
   5   3   4   64.55    2.17
   5  -3  -4   58.78    2.09
  -5   4   4   59.25    2.02
  -5   4   4   58.65    1.86
   5   4  -4   60.13    2.13
  -5  -4  -4   60.86    2.01
   5  -4   4   60.80    2.29
   5   4   4   58.26    2.17
  -5  -4   4   58.82    1.90
  -5   4  -4   60.32    2.01
   5   4   4   58.34    2.05
   5  -4  -4   62.67    2.11
  -5  -4   4   59.74    2.27
  -5   4  -4   57.89    1.91
  -5  -5  -4   10.45    0.83
   5  -5   4    8.53    0.90
   5   5  -4    9.35    0.82
  -5   5   4   10.57    0.90
  -5  -5  -4    9.14    0.66
  -5  -5   4    9.20    0.72
   5  -5  -4    8.23    0.75
  -5  -5   4   11.84    1.00
  -5   5  -4   10.22    0.72
  -5   5  -4   10.04    0.79
   5   5   4    8.03    0.73
  -5   6   4   44.85    1.75
   5   6  -4   44.37    1.89
   5  -6   4   44.73    2.02
  -5  -6  -4   45.93    1.83
  -5   6  -4   43.25    1.69
   5  -6  -4   44.44    1.90
  -5   6  -4   45.31    1.70
   5   6   4   44.30    1.83
  -5  -6   4   43.10    2.02
  -5  -7  -4   16.82    1.27
   5   7  -4   17.60    1.28
  -5   7   4   15.36    1.17
   5  -7   4   14.55    1.30
  -5  -7   4   18.85    1.41
   5  -7  -4   18.75    1.38
   5   7   4   16.76    1.21
  -5   7  -4   15.34    1.16
   5  -8   4   10.55    1.34
  -5   8   4    8.58    1.01
  -5  -8  -4    9.62    1.11
   5   8  -4    9.85    1.22
  -5   8  -4   10.98    1.05
   5  -8  -4    9.98    1.16
   5   8   4   10.31    1.19
  -5   0   5   -0.11    0.35
   5   0   5    0.08    0.30
  -5   0  -5    0.17    0.27
   5   0  -5   -0.09    0.20
   5   0  -5    0.07    0.19
   5   0  -5   -0.08    0.29
  -5  -1  -5    8.74    0.46
  -5   1   5    8.56    0.55
   5   1  -5    9.06    0.68
   5   1  -5    9.15    0.37
  -5  -1  -5    8.60    0.59
   5  -1   5    8.77    0.69
  -5   1  -5   10.45    0.64
   5  -1  -5    9.03    0.59
   5  -1  -5    9.12    0.53
  -5  -1   5    9.32    0.73
   5   1   5    8.17    0.42
   5   1   5    8.87    0.65
   5  -2   5   31.02    1.35
   5   2  -5   31.33    1.26
  -5  -2  -5   30.88    1.18
  -5   2   5   31.55    1.15
  -5  -2  -5   29.98    1.15
  -5   2   5   30.87    1.21
   5  -2  -5   25.44    1.18
   5  -2  -5   34.04    1.19
  -5   2  -5   32.31    1.21
   5   2   5   32.13    1.26
   5   2   5   31.15    1.09
  -5   3   5  146.96    4.63
  -5  -3  -5  151.30    4.64
   5  -3   5  160.63    4.85
  -5   3   5  151.89    4.59
   5   3  -5  157.51    4.74
  -5   3  -5  149.71    4.66
  -5  -3   5  152.55    4.85
   5  -3  -5  150.48    4.69
   5   3   5  150.95    4.61
   5   3   5  153.56    4.76
  -5   3  -5  151.36    4.49
   5   4  -5   17.31    1.07
  -5   4   5   15.71    0.85
  -5  -4  -5   16.32    0.88
  -5   4   5   16.93    0.75
   5  -4   5   15.05    1.20
  -5  -4   5   16.38    1.18
  -5   4  -5   16.73    0.74
   5   4   5   15.73    1.07
  -5   4  -5   17.51    0.90
   5  -4  -5   17.64    0.98
   5   4   5   14.72    0.90
  -5  -4   5   15.04    0.73
   5   5  -5   51.87    2.48
  -5   5   5   59.70    2.04
   5  -5   5   60.66    2.43
  -5  -5  -5   54.64    1.96
  -5  -5  -5   57.53    2.12
  -5   5  -5   54.66    1.92
  -5   5  -5   57.32    2.02
  -5  -5   5   61.35    2.36
   5   5   5   58.07    2.08
  -5  -6  -5   27.79    1.41
   5   6  -5   28.50    1.54
   5  -6   5   27.93    1.76
  -5   6   5   28.85    1.34
  -5   6  -5   26.89    1.32
  -5   6  -5   26.46    1.26
   5  -6  -5   26.30    1.48
   5   6   5   28.76    1.46
  -5  -6   5   30.39    1.73
  -5  -7  -5   13.90    1.14
  -5   7   5   15.47    1.10
   5  -7   5   15.43    1.44
   5   7  -5   14.87    1.24
  -5   7  -5   15.98    1.06
  -5  -7   5   16.96    1.42
   5  -7  -5   12.99    1.17
  -5  -8  -5    6.20    1.04
   5   8  -5    6.26    1.17
   5  -8   5    5.26    1.28
  -5   8   5    6.04    0.97
   5  -8  -5    4.36    1.02
   5   8   5    5.09    1.03
   5   0  -6    0.09    0.23
   5   0   6   -0.19    0.35
   5   0  -6   -0.20    0.32
  -5   0   6    0.10    0.44
  -5   0  -6    0.04    0.31
   5   1  -6    5.71    0.38
  -5   1   6    5.35    0.47
  -5   1   6    5.48    0.57
  -5  -1  -6    5.55    0.50
   5  -1   6    4.68    0.55
   5   1  -6    7.04    0.61
  -5  -1  -6    4.89    0.34
  -5   1  -6    4.77    0.49
   5   1   6    5.02    0.33
   5  -1  -6    5.32    0.61
   5   1   6    5.75    0.57
  -5  -1   6    6.89    0.71
   5  -1  -6    5.52    0.48
  -5   2   6   33.00    1.20
  -5  -2  -6   30.99    1.23
   5  -2   6   31.11    1.38
   5   2  -6   31.87    1.32
  -5  -2  -6   28.95    1.17
  -5   2   6   31.55    1.27
   5   2   6   32.46    1.34
  -5   2  -6   30.96    1.26
   5   2   6   31.69    1.11
   5  -2  -6   33.21    1.23
  -5  -2   6   31.40    1.43
  -5  -2   6   32.06    1.02
   5  -3   6   18.32    1.15
   5   3  -6   20.86    1.06
  -5  -3  -6   18.56    0.91
  -5   3   6   17.16    0.89
  -5   3   6   17.20    0.97
  -5   3  -6   18.20    0.67
   5   3   6   18.04    1.09
  -5  -3   6   18.03    0.67
  -5  -3   6   17.96    1.21
   5   3   6   18.42    0.87
  -5   3  -6   18.83    0.97
   5  -3  -6   18.50    0.96
   5  -4   6   37.77    1.72
  -5   4   6   35.85    1.42
  -5  -4  -6   35.51    1.41
   5   4  -6   35.50    1.57
   5  -4  -6   36.86    1.53
  -5   4  -6   35.27    1.45
  -5   4  -6   35.21    1.26
  -5  -4   6   35.34    1.69
   5   4   6   38.42    1.64
   5   4   6   36.63    1.43
  -5  -5  -6   39.24    1.56
  -5  -5  -6   42.61    1.74
   5   5  -6   38.22    1.73
  -5   5   6   41.34    1.61
   5  -5   6   40.52    1.99
  -5   5  -6   41.85    1.72
  -5  -5   6   42.31    1.97
   5   5   6   39.55    1.65
   5  -5  -6   42.34    1.76
  -5   5  -6   41.91    1.65
  -5  -6  -6    1.04    0.62
   5  -6   6    0.42    0.88
   5   6  -6    2.67    0.78
  -5   6   6    1.05    0.56
   5  -6  -6    1.69    0.69
  -5  -6   6    2.07    0.95
   5   6   6    1.36    0.68
  -5   7   6   21.38    1.37
   5   7  -6   22.43    1.64
  -5  -7  -6   23.97    1.54
   5  -7   6   22.43    1.71
  -5  -7   6   21.89    1.65
   5   7   6   23.21    1.46
   5  -7  -6   18.86    1.55
  -5   7  -6   23.18    1.54
   5  -8   6    5.26    1.43
   5   8  -6    7.23    1.19
  -5  -8  -6    8.53    1.18
  -5   8   6    6.63    1.10
   5   8   6    8.87    1.20
  -5  -8   6    6.42    1.80
   5  -8  -6    7.07    2.01
   5   0   7    0.35    0.45
   5   0  -7   -0.12    0.27
  -5   0  -7   -0.05    0.35
  -5   0   7    0.26    0.46
   5   0  -7   -0.02    0.37
  -5   1   7    4.34    0.59
  -5  -1  -7    4.48    0.50
  -5   1   7    3.36    0.45
   5   1  -7    4.85    0.57
   5  -1   7    4.16    0.57
  -5  -1   7    3.55    0.60
   5   1   7    3.99    0.53
  -5  -1   7    4.40    0.42
  -5   1  -7    4.55    0.53
   5  -1  -7    4.61    0.45
   5   1   7    4.20    0.31
   5  -2   7    0.33    0.50
   5   2  -7    0.65    0.46
  -5   2   7    0.46    0.47
  -5   2   7    0.87    0.35
  -5  -2  -7    0.48    0.38
   5  -2  -7    0.81    0.40
  -5   2  -7    0.75    0.42
   5   2   7    0.72    0.47
  -5  -2   7    0.34    0.28
  -5  -2   7    0.45    0.55
   5   2   7    0.52    0.29
   5   3  -7   51.15    1.87
  -5   3   7   47.35    1.71
  -5  -3  -7   48.33    1.73
  -5   3   7   47.83    1.73
   5  -3   7   45.84    1.94
   5  -3  -7   50.36    1.79
  -5   3  -7   45.41    1.78
   5   3   7   44.99    1.90
   5   3   7   48.17    1.65
  -5  -3   7   46.22    1.96
  -5   4   7    7.06    0.66
  -5  -4  -7    9.02    0.71
   5   4  -7    8.66    0.82
   5  -4   7    6.04    0.85
  -5   4  -7    7.36    0.71
   5   4   7    7.59    0.66
  -5  -4   7    9.03    1.01
   5   4   7    7.73    0.87
   5  -4  -7    7.35    0.74
   5  -5   7   78.91    3.06
   5   5  -7   82.14    2.89
  -5  -5  -7   81.44    2.79
  -5   5   7   82.91    2.76
   5  -5  -7   81.27    2.90
  -5   5  -7   78.22    2.79
   5   5   7   82.20    2.75
  -5  -5   7   79.79    3.08
  -5   6   7   15.89    1.09
  -5  -6  -7   15.22    1.22
   5  -6   7   16.31    1.41
   5   6  -7   15.33    1.19
  -5   6  -7   15.39    1.20
  -5  -6   7   16.89    1.41
   5  -6  -7   15.55    1.18
   5   6   7   15.65    1.09
  -5  -7  -7  122.80    4.21
   5   7  -7  119.47    4.19
  -5   7   7  124.06    4.05
   5  -7   7  117.54    4.46
   5   7   7  118.66    4.08
  -5   7  -7  120.66    4.04
   5  -7  -7  123.30    4.23
  -5  -7   7  118.72    4.42
  -5   8   7   10.17    1.12
   5  -8   7   13.32    1.92
  -5  -8  -7    9.44    1.52
  -5  -8   7   11.89    1.66
   5   8   7   13.04    1.42
   5  -8  -7   13.94    1.42
  -5   0   8   -0.06    0.50
   5   0  -8    0.31    0.43
   5   0   8   -0.26    0.44
   5   0  -8    0.23    0.33
  -5   0  -8    0.04    0.40
  -5   1   8    5.48    0.56
   5  -1   8    4.44    0.64
  -5  -1  -8    3.72    0.52
   5   1  -8    4.11    0.61
  -5   1   8    5.02    0.68
  -5  -1   8    4.46    0.49
  -5   1  -8    3.99    0.54
   5   1   8    3.12    0.54
   5  -1  -8    5.14    0.51
  -5  -1   8    3.80    0.69
  -5   2   8   21.31    1.02
  -5  -2  -8   22.50    1.08
  -5   2   8   21.50    1.16
   5   2  -8   22.95    1.19
   5  -2   8   21.69    1.27
   5  -2  -8   22.28    1.08
  -5   2  -8   22.42    1.14
  -5  -2   8   19.77    1.32
   5   2   8   21.66    1.20
  -5  -2   8   22.19    0.92
   5   3  -8   14.63    1.07
   5  -3   8   14.91    1.35
  -5  -3  -8   14.36    0.92
  -5   3   8   15.49    1.00
   5   3   8   14.36    1.16
   5   3   8   13.07    0.80
  -5   3  -8   16.56    1.50
   5  -3  -8   13.95    0.95
  -5  -3   8   11.58    1.06
   5   4  -8    2.07    0.64
   5  -4   8    2.05    0.70
  -5   4   8    2.58    0.56
  -5  -4  -8    1.92    0.53
  -5   4  -8    1.90    0.59
   5   4   8    1.48    0.72
   5   4   8    2.18    0.53
   5  -4  -8    1.44    0.68
  -5  -4   8    2.17    0.85
  -5   5   8   12.83    0.92
   5   5  -8   12.12    1.00
   5  -5   8   13.72    1.21
   5  -5  -8   11.39    1.01
  -5  -5   8   13.47    1.30
   5   5   8    9.49    1.10
  -5   5  -8   10.79    0.93
   5   5   8   11.62    1.06
  -5   6   8   15.85    1.19
   5  -6   8   17.89    1.45
  -5  -6  -8   17.78    1.38
   5   6  -8   15.84    1.22
   5  -6  -8   15.89    1.25
  -5   6  -8   16.65    1.33
  -5  -6   8   17.83    1.54
   5   6   8   18.62    1.30
   5  -7   8   13.05    1.48
   5   7  -8   15.42    1.35
  -5   7   8   12.93    1.12
  -5  -7  -8   14.32    1.27
   5  -7  -8   15.95    1.37
  -5  -7   8   12.05    1.56
   5   7   8   11.09    1.20
  -5   7  -8   14.85    1.22
  -5   0   9    0.19    0.60
  -5   0  -9    0.10    0.46
   5   0  -9    0.10    0.45
  -5   1   9   13.59    0.94
  -5  -1  -9   16.13    0.98
  -5   1   9   15.44    1.11
   5   1  -9   12.43    0.96
   5   1   9   13.09    1.08
  -5  -1   9   15.05    1.15
  -5   1  -9   15.00    1.11
  -5  -1   9   14.41    0.91
   5  -1  -9   15.43    0.91
  -5   2   9   12.36    1.23
  -5  -2  -9    9.43    0.74
   5  -2   9    7.00    0.81
   5   2  -9   10.11    0.85
  -5   2   9   11.11    0.90
   5  -2  -9    9.77    0.75
  -5  -2   9    9.64    1.02
   5   2   9    8.36    0.84
  -5   2  -9    9.18    0.82
  -5   3   9   23.16    1.27
  -5   3   9   21.34    1.11
  -5  -3  -9   21.28    1.15
   5  -3   9   19.29    1.35
   5   3   9   22.82    1.01
  -5  -3   9   19.49    1.52
   5  -3  -9   22.03    1.20
  -5   3  -9   20.95    1.24
   5   3   9   21.22    1.38
   5   4  -9   21.80    1.33
  -5   4   9   19.57    1.15
   5  -4   9   20.35    1.39
  -5  -4  -9   21.32    1.16
   5   4   9   18.26    1.52
  -5  -4   9   18.66    1.45
  -5   4  -9   19.83    1.27
   5   4   9   20.57    1.09
   5  -4  -9   19.85    1.30
   5  -5   9   51.75    2.36
   5   5  -9   52.91    2.21
  -5   5   9   55.20    2.07
  -5   5  -9   52.12    2.19
  -5  -5   9   52.50    2.58
   5   5   9   52.54    2.51
   5   5   9   56.47    2.08
   5  -5  -9   54.84    2.26
   5  -6   9   17.83    1.50
  -5  -6  -9   15.23    1.29
   5   6  -9   15.78    1.28
  -5   6   9   15.38    1.15
  -5  -6   9   14.21    1.53
   5  -6  -9   17.07    1.36
  -5   6  -9   14.59    1.20
   5   6   9   16.56    1.19
  -5   7   9   18.32    1.34
   5  -7   9   21.70    1.81
  -5  -7  -9   22.15    1.74
   5   7  -9   20.51    1.52
  -5  -7   9   16.67    1.77
  -5   7  -9   21.61    1.70
   5   7   9   20.31    1.45
  -5   0 -10    0.36    0.53
  -5   0  10   -0.31    0.70
   5   0 -10   -0.10    0.53
   5   0  10   -0.12    0.59
  -5   1  10    8.32    0.92
  -5  -1 -10    9.16    0.81
   5  -1  10    9.23    0.93
   5   1 -10    7.36    0.79
   5   1  10    8.14    0.87
  -5   1 -10    8.12    0.81
   5  -1 -10    7.81    0.71
  -5  -1  10    8.09    0.97
  -5   2  10    8.02    0.74
  -5  -2 -10    7.36    0.83
   5  -2  10    6.96    0.85
  -5   2  10    6.76    0.87
   5   2  10    8.25    0.95
   5  -2 -10    7.32    0.75
  -5   2 -10    6.91    0.79
  -5  -2  10    7.71    1.03
  -5   3  10   11.71    0.86
   5  -3  10   10.73    1.03
  -5   3  10   12.72    1.00
   5   3 -10   11.92    1.00
   5  -3 -10   13.45    1.00
  -5  -3  10   11.17    1.20
   5   3  10    9.55    1.05
  -5   3 -10   13.45    1.03
   5   4 -10   27.78    1.56
  -5   4  10   24.19    1.35
   5  -4  10   27.22    1.64
  -5  -4 -10   28.10    1.38
  -5  -4  10   26.24    1.90
   5   4  10   29.31    1.87
   5  -4 -10   29.07    1.55
  -5   4 -10   28.55    1.56
   5   5 -10   10.26    1.03
  -5   5  10   10.31    0.96
   5  -5  10    7.82    1.11
  -5   5 -10   10.31    1.05
   5   5  10    8.54    1.29
  -5  -5  10    9.59    1.34
   5  -5 -10    9.87    1.10
   5  -6  10   12.83    1.41
  -5   6  10   12.38    1.11
  -5  -6 -10   12.07    1.35
   5   6 -10   13.17    1.25
   5  -6 -10   13.87    1.32
  -5   6 -10   13.42    1.24
  -5  -6  10   12.68    1.57
  -5   0  11    0.27    0.78
   5   0 -11    0.30    0.62
   5   0  11    0.37    0.65
  -5   0 -11    0.04    0.59
  -5  -1 -11   10.97    0.91
  -5   1  11    8.53    1.03
   5   1 -11    8.43    0.89
   5  -1  11    9.51    0.99
   5  -1 -11    7.64    0.83
   5  -1 -11    8.66    0.81
  -5  -1  11   11.26    1.14
   5   1  11    9.31    0.98
  -5   1 -11    9.79    0.92
   5  -2  11    4.20    0.84
  -5   2  11    4.61    0.70
   5   2 -11    4.19    0.79
  -5   2  11    4.57    1.25
  -5  -2 -11    4.17    0.72
   5  -2 -11    3.92    0.82
  -5   2 -11    3.98    0.77
  -5  -2  11    4.62    1.02
   5   2  11    3.81    0.87
  -5  -3 -11   19.55    1.29
  -5   3  11   17.98    1.21
   5  -3  11   18.54    1.43
   5   3 -11   20.55    1.41
   5   3  11   20.95    1.66
  -5   3 -11   18.07    1.44
   5  -3 -11   19.51    1.37
  -5  -3  11   21.44    1.62
  -5   4  11    7.64    0.86
   5  -4  11    8.25    1.08
   5   4 -11    8.06    1.01
   5   4  11    7.20    1.21
  -5  -4  11    8.82    1.33
  -5   4 -11    7.62    1.00
   5  -4 -11    9.93    1.06
  -5   5  11   22.11    1.40
   5   5 -11   23.45    1.62
   5  -5  11   23.92    1.83
  -5  -5  11   21.38    1.84
   5  -5 -11   23.28    1.71
  -5   5 -11   24.39    1.73
   5   5  11   21.64    1.82
  -5   6  11   12.09    1.18
   5   6 -11   13.81    1.33
  -5  -6 -11   13.76    1.40
  -5  -6  11   10.66    1.66
  -5   6 -11   14.03    2.22
   5   0 -12    0.51    0.74
  -5   0 -12   -0.29    0.66
  -5   0  12   -0.38    0.86
   5   0  12    0.52    0.73
   5   1 -12    0.98    0.75
   5  -1  12    1.74    0.82
  -5   1  12    1.73    0.92
  -5  -1 -12    1.54    0.73
   5  -1 -12    1.46    0.72
  -5   1 -12    1.64    0.76
   5   1  12    1.26    0.83
  -5  -1  12    1.78    0.95
  -5   2  12   53.18    2.36
  -5   2  12   49.18    2.14
   5  -2  12   53.54    2.35
   5   2 -12   53.64    2.26
  -5  -2 -12   52.98    2.18
  -5  -2  12   57.76    2.64
   5   2  12   52.53    2.49
   5  -2 -12   54.97    2.22
  -5   2 -12   55.20    2.30
   5  -3  12   12.45    1.21
  -5   3  12   15.06    1.12
   5   3 -12   11.87    1.16
  -5  -3 -12   14.06    1.11
   5   3  12   12.67    1.38
   5  -3 -12   16.83    1.25
  -5  -3  12   12.71    1.44
  -5   3 -12   14.22    1.22
  -5   4  12    7.82    0.94
   5  -4  12    7.76    1.15
   5   4 -12    7.56    1.10
   5   4  12    9.46    1.40
   5  -4 -12    9.62    1.16
  -5   4 -12    9.51    1.14
  -5  -4  12   10.57    1.48
  -5   5  12    2.30    0.92
   5   5 -12    2.67    1.01
   5  -5  12    2.03    1.12
   5  -5 -12    2.60    1.08
  -5  -5  12    1.61    1.37
   5   5  12    1.81    1.33
  -5   5 -12    3.09    1.20
  -5   0  13   -0.76    0.96
   5   0  13    0.41    0.87
   5   0 -13    0.25    0.86
  -5   0 -13    0.22    0.79
   5  -1  13   15.13    1.32
  -5  -1 -13   15.92    1.22
  -5   1  13   18.88    1.52
   5   1 -13   15.41    1.27
   5   1  13   17.17    1.42
  -5  -1  13   16.45    1.55
  -5   1 -13   18.96    1.34
   5  -1 -13   14.07    1.20
  -5  -2 -13    4.53    0.90
  -5   2  13    5.85    1.16
   5  -2  13    4.33    1.07
   5   2 -13    5.24    0.98
   5  -2 -13    5.47    0.94
   5   2  13    3.88    1.14
  -5  -2  13    3.05    1.23
  -5   2 -13    5.16    0.99
  -5   3  13    3.78    0.90
   5   3 -13    4.71    1.10
  -5  -3 -13    5.16    0.97
   5  -3  13    6.03    1.14
   5   3  13    5.44    1.43
  -5  -3  13    4.28    1.42
   5  -3 -13    6.60    1.11
  -5   3 -13    5.47    1.37
  -5   4  13   14.40    1.20
  -5   4 -13   12.91    1.38
  -5  -4  13   14.85    1.73
   5  -4 -13   16.83    1.45
   5   4  13   13.38    1.65
   5   0 -14   -0.14    1.02
   5   0  14   -0.65    1.08
  -5   0 -14   -0.08    0.93
  -5   0  14    0.27    1.13
  -5  -1 -14    4.91    1.01
  -5   1  14    4.07    1.26
   5  -1  14    4.11    1.07
  -5  -1  14    4.64    1.32
   5  -1 -14    5.82    1.09
  -5  -2 -14   14.32    1.28
  -5   2 -14   15.38    1.39
   5   2  14   11.93    1.50
   5  -2 -14   12.14    1.26
  -5  -2  14   16.53    1.80
   5  -3  14    0.98    1.14
  -5   3  14   -0.22    0.93
   5   3  14    0.20    1.33
  -5  -3  14    0.16    1.39
  -5   3 -14    0.45    1.07
   6   0   0  213.79    6.62
  -6   0   0  228.29    6.69
   6   0   0  230.29    6.65
   6   0   0  228.16    6.64
  -6  -1   0   16.98    0.76
  -6   1   0   17.00    0.74
   6   1   0   18.03    0.77
   6  -1   0   19.24    0.81
  -6   1   0   18.41    0.70
   6   1   0   18.87    0.68
  -6  -1   0   18.19    0.71
  -6  -1   0   17.69    0.78
  -6   1   0   19.16    0.78
   6  -1   0   17.63    0.72
   6  -2   0  143.07    4.27
  -6  -2   0  132.45    4.28
   6  -2   0  135.84    4.21
  -6   2   0  141.79    4.18
   6   2   0  147.64    4.28
   6   2   0  143.04    4.17
  -6   2   0  145.38    4.25
  -6  -2   0  132.00    4.15
  -6   3   0    0.27    0.26
  -6  -3   0   -0.04    0.28
   6  -3   0   -0.30    0.31
  -6  -3   0    0.04    0.24
  -6  -3   0    0.27    0.33
   6  -3   0   -0.02    0.32
   6   3   0    0.41    0.40
   6  -4   0  168.79    5.37
  -6   4   0  176.41    5.27
  -6  -4   0  176.82    5.37
  -6  -4   0  175.94    5.25
   6   4   0  176.33    5.37
   6  -5   0    0.12    0.50
   6   5   0   -0.39    0.54
  -6   5   0    0.18    0.36
  -6  -5   0   -0.18    0.51
  -6  -5   0   -0.03    0.39
  -6   5   0    0.32    0.41
  -6  -6   0   15.43    1.23
   6  -6   0   17.23    1.21
  -6  -6   0   17.29    1.03
  -6   6   0   19.22    1.56
   6   6   0   18.54    1.21
   6  -7   0   14.21    1.15
  -6  -7   0   15.24    1.18
   6   7   0   16.50    1.20
  -6   7   0   16.21    1.16
   6  -8   0   11.52    1.23
   6   8   0   12.31    1.27
  -6   8   0   15.82    1.18
   6   9   0    4.90    1.26
   6  -9   0    3.65    1.21
  -6   0   1  275.78    8.13
   6   0  -1  282.83    8.11
   6   0   1  280.97    8.07
  -6   0  -1  282.27    8.15
   6   0  -1  265.01    8.12
  -6   0  -1  263.52    8.09
   6   0   1  287.79    8.11
   6   0   1  282.61    8.09
   6   0  -1  277.89    8.05
  -6   0   1  254.03    8.02
   6   1  -1   18.72    0.86
  -6   1   1   22.40    0.79
   6   1  -1   20.75    0.70
  -6  -1  -1   21.83    0.88
  -6  -1  -1   19.67    0.80
  -6   1   1   22.32    0.85
   6  -1   1   20.66    0.80
  -6   1   1   20.10    0.81
  -6   1  -1   20.64    0.86
  -6   1  -1   19.36    0.85
   6  -1  -1   19.82    0.81
  -6   1  -1   21.82    0.75
  -6  -1   1   19.99    0.71
   6   1   1   22.24    0.84
  -6  -1   1   19.99    0.88
   6  -1  -1   20.03    0.87
   6   1   1   20.99    0.80
   6   2  -1   91.18    2.89
   6  -2   1   94.38    2.91
  -6   2   1   89.67    2.79
   6  -2   1   91.20    2.78
  -6  -2  -1   90.00    2.87
   6   2  -1   91.01    2.72
  -6   2  -1   91.52    2.75
   6  -2  -1   90.88    2.84
  -6  -2   1   94.24    2.91
   6   2   1   94.40    2.80
  -6   2  -1   92.34    2.83
   6  -2  -1   84.15    2.80
   6   2   1   92.29    2.85
  -6  -2   1   86.93    2.70
   6  -3   1   27.04    1.15
  -6   3   1   27.68    1.02
  -6   3   1   28.05    1.00
   6   3  -1   27.67    1.17
  -6  -3  -1   25.79    1.10
  -6   3  -1   27.29    1.03
  -6  -3   1   27.01    0.94
   6  -3  -1   25.29    1.00
  -6   3  -1   27.55    0.99
   6   3   1   27.21    1.14
  -6  -3   1   25.83    0.94
   6  -3  -1   28.32    1.12
  -6  -3   1   26.62    1.16
  -6  -4  -1   51.38    1.74
   6   4  -1   50.24    1.88
   6  -4   1   50.19    1.89
  -6   4   1   52.45    1.67
  -6  -4  -1   50.08    1.83
  -6   4   1   50.61    1.75
  -6   4  -1   50.13    1.70
  -6  -4   1   52.99    1.91
  -6  -4   1   51.88    1.69
  -6   4  -1   51.10    1.72
   6   4   1   51.12    1.85
   6  -4  -1   49.37    1.85
   6  -5   1    4.71    0.66
  -6  -5  -1    3.59    0.50
  -6  -5  -1    4.13    0.61
  -6   5   1    3.37    0.51
  -6   5   1    4.36    0.42
   6   5  -1    3.44    0.66
  -6   5  -1    3.42    0.45
  -6   5  -1    3.49    0.50
  -6  -5   1    3.50    0.64
   6   5   1    4.49    0.68
  -6  -5   1    3.59    0.49
   6  -5  -1    4.35    0.63
  -6   6   1    3.61    0.60
   6  -6   1    2.88    0.69
  -6  -6  -1    3.46    0.61
   6   6  -1    3.99    0.76
  -6  -6  -1    3.56    0.70
   6   6   1    3.00    0.73
   6  -6  -1    3.79    0.71
  -6  -6   1    3.74    0.61
  -6  -6   1    3.77    0.75
  -6   6  -1    4.70    0.63
   6   7  -1    0.14    0.74
   6  -7   1    0.33    0.72
  -6   7   1    0.02    0.61
  -6   7  -1    0.92    0.65
  -6  -7   1    0.51    0.95
   6  -7  -1   -0.38    0.71
  -6  -7   1    0.11    0.63
   6   7   1    0.14    0.81
   6  -8   1   14.17    1.34
  -6  -8  -1   13.99    1.19
   6   8  -1   13.84    1.32
  -6   8   1   13.59    1.12
  -6   8  -1   12.62    1.10
   6   8   1   13.29    1.33
   6  -8  -1   12.27    1.29
   6   9  -1    4.23    1.24
   6  -9   1    2.32    1.20
  -6   9   1    3.96    1.07
   6  -9  -1    3.20    1.17
   6   9   1    4.53    1.29
  -6   9  -1    4.26    1.08
  -6   0  -2  276.36    8.54
   6   0   2  286.46    8.42
  -6   0   2  296.41    8.56
   6   0   2  276.12    8.44
   6   0  -2  295.70    8.53
   6   0  -2  296.71    8.43
  -6   0   2  289.60    8.41
  -6   0  -2  295.79    8.54
   6  -1   2   90.73    2.83
  -6  -1  -2   89.22    2.79
   6  -1   2   86.26    2.64
  -6   1   2   89.34    2.76
   6   1  -2   86.47    2.78
  -6  -1  -2   85.18    2.68
  -6  -1  -2   82.78    2.74
  -6   1   2   88.42    2.72
   6   1   2   89.15    2.71
  -6   1  -2   90.05    2.76
  -6  -1   2   88.89    2.82
   6  -1  -2   87.23    2.69
   6   1   2   92.93    2.76
   6   2  -2  134.32    4.02
  -6  -2  -2  132.50    3.99
  -6   2   2  128.45    3.91
  -6  -2  -2  123.38    3.92
   6  -2   2  127.05    3.86
  -6   2   2  129.54    4.00
   6  -2   2  127.96    4.07
   6   2   2  134.22    4.02
  -6   2  -2  129.42    3.84
  -6  -2   2  132.41    4.05
   6   2   2  130.03    3.93
  -6   2  -2  130.62    3.94
   6  -2  -2  131.55    3.94
   6  -2  -2  122.87    3.91
   6  -3   2   68.82    2.38
   6   3  -2   73.38    2.36
   6  -3   2   70.38    2.29
  -6   3   2   71.78    2.23
  -6  -3  -2   68.62    2.28
  -6   3   2   68.91    2.19
  -6   3  -2   69.61    2.17
  -6  -3   2   68.08    2.10
   6  -3  -2   66.07    2.18
  -6  -3   2   68.41    2.09
  -6  -3   2   70.52    2.38
   6   3   2   70.24    2.29
   6  -3  -2   71.72    2.30
   6   3   2   68.38    2.29
  -6   3  -2   69.01    2.23
   6   4  -2   36.63    1.47
  -6  -4  -2   35.88    1.33
   6  -4   2   34.87    1.49
  -6  -4  -2   35.50    1.37
  -6   4   2   34.19    1.30
  -6   4   2   35.39    1.21
  -6  -4   2   34.69    1.49
  -6   4  -2   35.19    1.28
  -6  -4   2   33.52    1.20
   6  -4  -2   32.51    1.40
   6   4   2   32.83    1.41
  -6   4  -2   35.08    1.26
  -6  -5  -2    4.28    0.55
  -6  -5  -2    5.18    0.62
   6  -5   2    3.15    0.62
   6   5  -2    3.97    0.70
  -6   5   2    3.28    0.51
   6   5   2    4.26    0.66
   6  -5  -2    3.98    0.62
  -6   5  -2    5.13    0.50
  -6  -5   2    4.39    0.47
  -6  -5   2    3.21    0.67
  -6   5  -2    3.19    0.49
   6   6  -2    4.74    0.78
   6  -6   2    5.36    0.78
  -6  -6  -2    4.95    0.66
  -6  -6  -2    5.19    0.72
  -6   6   2    4.56    0.65
   6   6   2    5.04    0.79
  -6   6  -2    5.79    0.65
   6  -6  -2    4.94    0.76
  -6  -6   2    1.48    0.79
  -6  -6   2    5.57    0.63
  -6  -7  -2    0.54    0.62
   6   7  -2    0.63    0.80
  -6   7   2    0.68    0.63
   6  -7   2    0.35    0.79
  -6   7  -2    0.53    0.65
  -6  -7   2    0.36    0.96
   6   7   2    0.58    0.80
   6  -7  -2   -0.35    0.71
  -6   8   2    0.80    0.80
  -6  -8  -2    0.64    0.85
   6  -8   2    0.72    0.92
   6   8  -2    0.30    0.96
   6   8   2    0.49    0.95
   6  -8  -2    0.41    0.88
  -6   8  -2    0.57    0.80
   6   9  -2   12.65    1.47
   6  -9   2   11.54    1.49
  -6   9   2   10.98    1.24
   6  -9  -2   10.76    1.38
   6   9   2   11.84    1.45
  -6   9  -2   15.03    1.34
   6   0   3   96.84    3.09
  -6   0  -3   98.36    3.07
   6   0  -3   98.53    2.93
   6   0  -3   99.13    3.08
  -6   0   3  100.09    2.93
  -6   0   3   97.82    3.11
   6   0   3   99.30    2.93
   6   0   3   98.63    2.95
   6  -1   3  102.66    3.04
  -6  -1  -3   95.25    3.11
  -6  -1  -3  104.14    3.21
  -6   1   3  103.91    3.21
   6  -1   3  103.66    3.06
   6  -1   3  106.54    3.28
   6   1  -3  102.03    3.23
  -6   1   3  101.69    3.16
   6   1   3  103.71    3.20
  -6  -1   3  104.56    3.28
   6  -1  -3  103.16    3.11
  -6   1  -3  102.31    3.19
   6   1   3  104.67    3.11
  -6  -2  -3  128.94    4.01
   6   2  -3  130.13    4.08
  -6   2   3  138.30    4.05
   6  -2   3  133.33    4.15
  -6   2   3  131.14    3.98
   6  -2   3  129.81    3.89
  -6  -2  -3  130.62    4.05
   6  -2  -3  122.70    3.97
   6  -2  -3  132.50    3.99
   6   2   3  134.79    4.04
  -6   2  -3  132.21    4.01
  -6  -2   3  130.07    4.12
  -6   2  -3  130.13    3.87
   6   2   3  132.51    3.97
  -6   3   3   16.09    0.73
  -6   3   3   16.23    0.77
   6  -3   3   15.51    1.06
   6  -3   3   15.45    0.77
  -6  -3  -3   16.37    0.84
   6   3  -3   15.29    0.93
   6  -3  -3   14.63    0.74
   6   3   3   17.28    0.85
  -6   3  -3   15.36    0.66
   6   3   3   16.33    0.86
  -6  -3   3   14.54    0.97
   6  -3  -3   15.70    0.83
  -6   3  -3   16.41    0.80
   6  -4   3   11.66    0.91
  -6   4   3    9.95    0.58
   6   4  -3    9.73    0.77
  -6   4   3   10.71    0.72
  -6  -4  -3   11.53    0.74
   6   4   3    9.71    0.74
   6   4   3   10.31    0.83
  -6  -4   3    8.50    0.79
  -6   4  -3   11.73    0.73
   6  -4  -3   10.03    0.80
  -6   4  -3   10.95    0.63
  -6  -4   3    9.13    0.55
  -6   5   3   16.56    0.93
  -6  -5  -3   15.47    0.96
  -6  -5  -3   15.81    0.98
  -6   5  -3   16.22    0.87
   6  -5  -3   15.19    1.04
   6   5   3   17.48    1.06
  -6  -5   3   17.29    1.27
  -6   5  -3   16.83    0.92
  -6   6   3    2.62    0.62
   6  -6   3    2.10    0.76
   6   6  -3    2.19    0.72
  -6  -6  -3    2.25    0.60
  -6  -6  -3    2.39    0.64
   6  -6  -3    1.97    0.65
  -6   6  -3    2.24    0.55
  -6  -6   3    1.77    0.89
  -6   6  -3    1.96    0.56
   6   6   3    2.92    0.74
   6   7  -3   18.20    1.32
  -6  -7  -3   16.58    1.26
   6  -7   3   15.28    1.30
  -6   7   3   13.50    1.04
  -6   7  -3   14.55    1.10
   6  -7  -3   14.68    1.20
   6   7   3   16.12    1.19
  -6  -7   3   15.68    1.37
  -6   8   3    0.06    0.79
   6   8  -3    0.45    1.00
  -6  -8  -3   -0.13    0.82
   6  -8   3   -0.93    0.94
   6   8   3   -0.15    1.00
   6  -8  -3   -0.26    0.91
  -6   8  -3   -0.22    0.80
  -6   0  -4  138.19    4.29
   6   0   4  141.19    4.13
   6   0  -4  141.38    4.16
   6   0   4  138.53    4.11
   6   0  -4  145.50    4.32
  -6   0   4  144.93    4.37
   6   0  -4  139.06    4.14
   6   0   4  138.96    4.34
   6  -1   4   88.35    2.70
   6  -1   4   92.13    2.97
  -6   1   4   93.24    2.92
   6  -1   4   92.71    2.69
  -6   1   4   93.90    2.87
  -6  -1  -4   86.39    2.75
  -6  -1  -4   91.78    2.89
   6   1  -4   93.14    2.93
   6  -1  -4   87.41    2.84
  -6   1  -4   90.15    2.89
   6  -1  -4   92.37    2.80
  -6  -1   4   93.49    3.00
   6   1   4   96.32    2.93
   6   1   4   91.39    2.76
  -6  -2  -4   15.59    0.81
  -6   2   4   18.34    0.77
   6   2  -4   15.97    0.91
  -6  -2  -4   17.21    0.84
  -6   2   4   16.25    0.82
   6  -2   4   16.75    1.00
   6  -2   4   16.80    0.65
  -6  -2   4   16.69    0.96
  -6   2  -4   17.31    0.60
   6   2   4   17.77    0.89
   6  -2  -4   17.98    0.80
  -6   2  -4   18.26    0.84
   6   3  -4   10.61    0.79
  -6   3   4    9.35    0.65
  -6   3   4    9.99    0.64
   6  -3   4    9.74    0.85
  -6  -3  -4    9.74    0.74
   6   3   4   10.34    0.71
   6   3   4   10.94    0.80
   6  -3  -4   10.56    0.72
  -6   3  -4   10.95    0.52
  -6   3  -4   11.60    0.73
   6  -3  -4   10.91    0.80
  -6  -3   4   10.44    0.82
   6   4  -4   67.10    2.36
   6  -4   4   62.71    2.48
  -6  -4  -4   65.11    2.23
  -6   4   4   65.80    2.10
  -6   4   4   61.70    2.20
  -6  -4   4   67.81    2.48
   6   4   4   64.06    2.25
  -6   4  -4   66.39    2.10
   6   4   4   66.32    2.36
  -6   4  -4   68.32    2.23
   6  -4  -4   68.65    2.31
  -6  -4   4   66.91    2.15
   6  -5   4    0.87    0.70
  -6   5   4    1.02    0.47
   6   5  -4    0.99    0.64
  -6  -5  -4    1.06    0.48
  -6  -5  -4    0.66    0.47
  -6   5  -4    0.50    0.43
   6   5   4    0.76    0.57
   6  -5  -4    0.41    0.93
  -6   5  -4    0.58    0.46
  -6  -5   4    0.33    0.76
  -6   6   4    1.22    0.55
   6  -6   4    1.06    0.78
  -6  -6  -4    1.49    0.59
   6   6  -4    1.45    0.74
  -6   6  -4    1.82    0.58
   6   6   4    1.39    0.68
   6  -6  -4    1.36    0.64
  -6  -6   4    0.59    0.87
  -6   6  -4    1.11    0.54
   6   7  -4    5.05    0.95
  -6  -7  -4    4.52    0.83
  -6   7   4    4.54    0.76
   6  -7   4    4.15    1.07
   6   7   4    4.14    0.92
   6  -7  -4    4.20    0.88
  -6  -7   4    5.15    1.13
  -6   7  -4    4.41    0.74
   6  -8   4   12.67    1.49
  -6  -8  -4   10.70    1.17
   6   8  -4    9.84    1.27
  -6   8   4    9.64    1.05
   6  -8  -4   13.01    1.33
   6   8   4   10.19    1.26
   6   0   5  164.42    5.14
   6   0  -5  167.49    4.94
   6   0  -5  168.26    4.94
  -6   0   5  165.51    5.16
   6   0  -5  167.01    5.11
  -6   0  -5  172.67    5.10
  -6  -1  -5  129.67    4.03
  -6   1   5  135.00    4.01
  -6   1   5  135.56    4.08
  -6  -1  -5  121.97    3.86
   6  -1   5  131.33    4.12
   6   1  -5  129.10    4.07
   6   1   5  134.03    4.08
   6  -1  -5  124.05    3.96
   6   1   5  132.07    3.86
  -6  -1   5  132.82    4.15
   6  -1  -5  130.61    3.93
  -6   1  -5  130.59    4.04
  -6   2   5   24.95    1.06
  -6  -2  -5   20.39    0.97
  -6  -2  -5   23.60    1.04
   6   2  -5   23.63    1.13
  -6   2   5   24.09    0.99
   6  -2   5   25.27    1.22
   6   2   5   24.46    1.12
  -6  -2   5   22.22    1.21
   6  -2  -5   25.32    1.02
   6   2   5   25.08    1.02
  -6   2  -5   23.36    1.05
   6  -3   5  134.21    4.40
  -6  -3  -5  133.79    4.23
   6   3  -5  142.02    4.33
  -6   3   5  136.25    4.20
  -6   3  -5  131.52    4.01
   6  -3  -5  140.51    4.25
  -6   3  -5  135.39    4.22
   6   3   5  140.53    4.32
   6   3   5  131.78    4.15
   6  -4   5   16.03    1.16
  -6   4   5   13.92    0.77
  -6   4   5   14.06    0.82
  -6  -4  -5   13.65    0.87
   6   4  -5   12.02    0.92
  -6   4  -5   14.05    0.87
   6   4   5   13.98    0.91
  -6  -4   5   14.96    1.11
  -6   4  -5   13.00    0.68
   6  -4  -5   13.33    0.94
   6   4   5   13.36    1.04
  -6  -5  -5    8.97    1.20
  -6  -5  -5    5.12    0.61
   6   5  -5    6.88    0.83
  -6   5   5    7.41    0.71
   6  -5   5    6.18    0.93
  -6   5  -5    7.07    0.59
  -6   5  -5    6.38    0.67
   6  -5  -5    5.60    0.72
   6   5   5    6.06    0.74
   6   6  -5    1.57    0.77
   6  -6   5    0.25    0.87
  -6  -6  -5    0.85    0.61
  -6   6   5    1.14    0.56
  -6   6  -5    2.26    0.96
  -6   6  -5    0.83    0.60
   6  -6  -5    1.18    0.68
  -6  -6   5    1.16    0.92
   6   6   5    1.07    0.74
   6   7  -5    9.96    1.15
  -6   7   5    7.72    0.87
  -6  -7  -5    9.48    1.00
   6  -7   5   10.07    1.36
   6   7   5    8.70    1.07
  -6  -7   5    8.70    1.30
   6  -7  -5   11.07    1.14
   6   8  -5    5.04    1.27
  -6  -8  -5    5.50    1.09
   6  -8   5    1.71    1.39
   6   8   5    4.50    1.09
   6   0   6   22.27    1.14
   6   0  -6   26.66    0.91
   6   0  -6   23.85    1.09
   6   0  -6   24.74    0.94
  -6   0  -6   24.21    1.08
  -6   1   6  115.05    3.53
   6  -1   6  103.89    3.61
  -6  -1  -6  112.51    3.54
   6   1  -6  115.61    3.60
   6  -1  -6  112.10    3.52
   6   1   6  111.64    3.32
  -6   1  -6  112.57    3.55
   6  -1  -6  113.84    3.53
   6   1   6  112.91    3.60
   6   2  -6   17.40    1.04
  -6   2   6   18.40    0.88
   6  -2   6   17.94    1.12
  -6   2   6   19.91    1.02
  -6  -2  -6   18.67    0.94
  -6   2  -6   17.81    0.96
   6  -2  -6   19.40    0.92
  -6  -2   6   19.36    1.23
   6   2   6   19.62    0.81
   6   2   6   18.39    1.02
   6   3  -6   23.69    1.23
  -6  -3  -6   20.32    1.03
  -6   3   6   23.30    1.06
   6  -3   6   22.06    1.32
  -6   3   6   21.10    1.00
  -6   3  -6   21.28    1.09
  -6  -3   6   19.69    1.35
   6   3   6   21.45    1.20
   6  -3  -6   21.37    1.07
   6   3   6   23.08    0.99
  -6  -4  -6    0.67    0.48
   6   4  -6    1.91    1.09
   6  -4   6    0.95    0.65
  -6   4   6    1.45    0.45
  -6   4  -6    1.48    0.50
   6   4   6    1.85    0.63
   6   4   6    0.85    0.51
   6  -4  -6    1.55    0.54
  -6  -5  -6    8.00    0.73
   6  -5   6    9.09    1.05
  -6   5   6    7.51    0.73
   6   5  -6    8.13    0.90
  -6  -5   6    8.81    1.04
   6   5   6    7.92    0.80
   6  -5  -6    8.21    0.84
  -6   5  -6    7.86    0.76
   6   6  -6    1.97    0.79
   6  -6   6    1.22    0.94
  -6   6   6    1.40    0.60
  -6  -6  -6    2.31    0.72
   6   6   6    2.61    0.78
  -6   6  -6    2.11    0.68
   6  -6  -6    1.60    0.73
  -6  -6   6    1.07    0.97
   6   7  -6    0.77    0.95
  -6   7   6    0.73    0.67
  -6  -7  -6    0.61    0.77
   6  -7   6    0.31    1.10
   6  -7  -6    0.17    0.82
  -6  -7   6    0.14    1.13
   6   7   6    0.51    0.83
   6   8  -6    6.46    1.30
   6  -8   6    2.52    1.42
  -6   8   6    4.56    0.94
  -6  -8  -6    5.37    1.10
  -6  -8   6    3.69    1.45
   6  -8  -6    3.85    1.09
   6   8   6    4.88    1.13
   6   0  -7   14.41    0.87
   6   0   7   13.05    0.97
  -6   0   7   14.67    1.02
   6   0  -7   13.36    0.68
  -6   0  -7   13.56    0.86
   6  -1   7  224.24    7.22
  -6   1   7  231.92    7.12
  -6  -1  -7  241.73    7.15
   6   1  -7  241.74    7.20
  -6   1   7  231.90    7.20
   6   1  -7  237.65    6.92
   6   1   7  243.19    7.22
  -6  -1   7  228.41    7.27
   6  -1  -7  243.76    7.04
  -6   1  -7  238.67    7.15
   6   1   7  240.12    6.88
   6   2  -7   21.76    1.19
  -6   2   7   20.52    1.12
  -6   2   7   21.10    1.00
   6  -2   7   19.84    1.22
  -6  -2  -7   19.81    1.04
  -6   2  -7   22.75    1.09
   6   2   7   20.88    1.18
  -6  -2   7   22.18    1.35
   6   2   7   22.13    0.87
   6  -2  -7   21.46    1.03
  -6  -3  -7   22.58    1.10
   6   3  -7   23.83    1.26
  -6   3   7   19.40    1.12
  -6   3   7   24.03    1.48
  -6   3  -7   22.74    1.15
   6   3   7   22.20    1.02
   6  -3  -7   23.69    1.14
   6   3   7   22.20    1.27
   6   4  -7    7.26    0.83
  -6  -4  -7    5.36    0.65
  -6   4   7    5.28    0.64
   6  -4   7    4.83    0.86
  -6  -4   7    5.12    0.91
   6   4   7    5.88    0.65
   6   4   7    4.44    0.76
  -6   4  -7    5.58    0.80
   6  -4  -7    4.87    0.69
   6   5  -7   10.88    0.99
   6  -5   7    9.35    1.11
  -6  -5  -7    9.30    0.81
  -6   5   7    9.98    0.81
  -6  -5   7    9.57    1.14
   6   5   7    9.11    1.06
   6  -5  -7   11.34    0.99
   6   5   7    9.83    0.85
  -6   5  -7   10.49    0.87
  -6  -6  -7   14.35    1.15
   6   6  -7   10.02    1.08
  -6   6   7   13.86    1.07
   6  -6   7   11.40    1.30
  -6   6  -7   10.68    0.98
   6   6   7   10.14    0.99
  -6  -6   7   11.72    1.35
   6  -6  -7   10.89    1.07
  -6   7   7   10.72    1.05
   6   7  -7   12.01    1.27
  -6  -7  -7   12.85    1.22
   6  -7   7    9.40    1.43
   6  -7  -7   12.60    1.26
   6   7   7   12.46    1.18
  -6  -7   7   10.39    1.52
  -6   7  -7   10.05    1.12
  -6   8   7    3.87    0.98
  -6  -8  -7    5.76    1.17
   6  -8   7    4.59    1.49
   6   8  -7    7.12    1.33
  -6  -8   7    5.95    1.57
   6  -8  -7    5.75    1.23
  -6   0   8   35.59    1.63
  -6   0  -8   37.09    1.50
   6   0   8   37.74    1.59
   6   0  -8   34.11    1.45
   6   0  -8   37.48    1.51
  -6   1   8   28.20    1.41
   6   1  -8   31.29    1.42
   6  -1   8   29.42    1.45
  -6  -1  -8   30.89    1.36
  -6   1   8   34.10    1.35
  -6  -1   8   30.88    1.54
  -6   1  -8   28.92    1.36
   6  -1  -8   31.79    1.25
   6   1   8   32.93    1.44
  -6   2   8   32.62    1.46
   6   2  -8   30.97    1.48
  -6   2   8   32.00    1.41
  -6  -2  -8   31.17    1.35
  -6   2  -8   29.32    1.89
   6  -2  -8   29.30    1.32
   6   3  -8   29.50    1.71
  -6  -3  -8   30.11    1.38
   6  -3   8   32.83    1.63
  -6   3   8   29.01    1.36
  -6   3   8   33.18    1.44
   6   3   8   35.02    1.65
   6   3   8   33.19    1.27
  -6   3  -8   32.42    1.47
   6  -3  -8   31.27    1.45
  -6  -3   8   35.07    1.70
   6  -4   8    8.05    0.95
   6   4  -8    8.96    0.90
  -6   4   8    7.24    0.74
  -6  -4  -8    7.14    0.73
   6   4   8    9.21    0.75
   6  -4  -8    9.41    0.88
   6   4   8    8.75    0.96
  -6   4  -8    9.79    0.84
  -6  -4   8    7.08    1.02
  -6   5   8    4.72    0.70
   6  -5   8    4.25    0.97
   6   5  -8    3.41    0.80
  -6   5  -8    3.81    0.75
   6   5   8    3.37    0.92
   6  -5  -8    3.55    0.79
  -6  -5   8    2.88    0.99
   6  -6   8   23.26    1.69
   6   6  -8   21.56    1.54
  -6   6   8   20.56    1.38
  -6  -6  -8   20.72    1.51
  -6  -6   8   19.99    1.67
   6  -6  -8   19.70    1.55
  -6   6  -8   19.61    1.44
   6   6   8   20.98    1.41
  -6   7   8    3.34    1.32
   6  -7   8    5.24    1.28
   6   7  -8    5.59    1.15
  -6  -7  -8    4.00    1.00
   6  -7  -8    5.56    1.11
  -6  -7   8    4.01    1.42
   6   7   8    5.56    1.08
  -6   7  -8    5.97    1.05
   6   0  -9   12.19    0.89
  -6   0   9    9.49    0.95
   6   0  -9   10.55    0.78
  -6   0  -9   11.47    0.85
   6   0   9    8.70    0.85
   6  -1   9   20.26    1.25
   6   1  -9   20.91    1.22
  -6   1   9   21.16    1.31
   6  -1  -9   20.10    1.05
  -6   1  -9   20.53    1.18
  -6  -1   9   18.46    1.32
   6   1   9   21.85    1.24
   6  -2   9   27.63    1.50
   6   2  -9   24.79    1.44
  -6  -2  -9   27.02    1.53
  -6   2   9   26.55    1.27
  -6   2   9   30.69    1.48
  -6   2  -9   28.23    1.39
   6  -2  -9   28.44    1.30
  -6  -2   9   27.91    1.62
   6   2   9   28.22    1.52
  -6   3   9   29.63    1.45
  -6   3   9   29.06    1.32
   6   3  -9   25.97    1.51
  -6  -3  -9   29.52    1.40
   6  -3   9   28.55    1.62
  -6   3  -9   29.37    1.45
  -6  -3   9   28.71    1.73
   6   3   9   29.16    1.65
   6  -3  -9   30.60    1.45
  -6   4   9    3.21    0.63
   6  -4   9    3.73    0.86
  -6  -4  -9    3.00    0.66
   6   4  -9    3.22    0.80
   6  -4  -9    3.04    0.75
   6   4   9    2.58    0.88
  -6  -4   9    3.22    0.99
  -6   4  -9    2.71    0.70
   6   5  -9    5.44    0.90
   6  -5   9    7.15    1.08
  -6   5   9    6.59    0.85
   6  -5  -9    7.99    0.99
  -6  -5   9    5.57    1.13
   6   5   9    6.44    0.87
   6   5   9    6.30    1.13
  -6   5  -9    7.02    0.91
   6  -6   9    7.49    1.24
  -6   6   9    7.05    0.91
  -6  -6  -9    6.31    1.04
   6   6  -9    6.80    1.07
  -6   6  -9    6.35    0.99
   6   6   9    5.32    0.95
  -6  -6   9    6.91    1.42
   6  -6  -9    4.53    1.02
  -6   7   9    2.57    0.95
  -6  -7  -9    2.31    1.03
   6  -7   9    2.11    1.29
  -6   7  -9    2.49    1.04
   6   7   9    2.01    1.06
   6  -7  -9    1.60    1.09
  -6   0 -10   31.70    1.53
   6   0  10   31.84    1.63
   6   0 -10   31.87    1.55
  -6   0  10   31.14    1.67
   6   1 -10   38.66    1.73
  -6  -1 -10   37.87    1.70
   6  -1  10   41.28    1.87
   6   1  10   38.97    1.82
  -6   1 -10   40.31    1.75
   6  -1 -10   39.49    1.75
  -6  -1  10   41.89    1.95
   6  -1 -10   39.47    1.61
  -6  -2 -10   21.93    1.31
   6  -2  10   23.65    1.47
  -6   2  10   22.91    1.24
   6   2 -10   22.83    1.40
  -6   2  10   24.09    1.48
   6  -2 -10   24.25    1.28
  -6  -2  10   22.45    1.63
  -6   2 -10   23.06    1.35
   6   2  10   21.11    1.49
   6   3 -10   29.58    1.56
   6  -3  10   25.99    1.65
  -6  -3 -10   27.75    1.47
  -6   3  10   27.41    1.41
   6  -3 -10   29.49    1.47
  -6  -3  10   28.23    1.78
   6   3  10   28.42    1.75
  -6   3 -10   30.58    1.55
  -6   4  10    8.76    0.86
  -6  -4 -10    9.50    0.90
   6   4 -10    7.78    1.00
   6  -4  10    9.86    1.11
  -6  -4  10    5.49    1.18
  -6   4 -10    9.46    0.97
   6   4  10    7.27    1.12
   6  -4 -10   10.23    1.04
   6  -5  10    7.74    1.16
   6   5 -10    9.14    1.09
  -6   5  10   10.15    0.97
   6   5  10   12.15    1.42
  -6  -5  10    9.85    1.45
  -6   5 -10   10.67    1.07
   6  -5 -10   10.87    1.17
   6  -6  10    2.98    1.20
   6   6 -10    4.17    1.05
  -6   6 -10    3.19    0.98
   6  -6 -10    3.14    1.04
  -6  -6  10    2.43    1.48
  -6   0  11   34.66    1.93
  -6   0 -11   36.16    1.72
   6   0  11   37.08    1.82
   6   0 -11   38.40    1.76
   6   1 -11   11.65    1.02
   6  -1  11   13.34    1.16
  -6   1  11   13.47    1.22
  -6  -1 -11   15.28    1.06
   6  -1 -11   13.42    1.05
  -6   1 -11   13.13    1.06
  -6  -1  11   14.26    1.31
   6   1  11    9.53    1.08
  -6   2  11   14.40    1.20
   6   2 -11   11.57    1.07
  -6  -2 -11   13.59    1.04
   6  -2  11   12.11    1.14
  -6   2  11   12.56    1.00
   6  -2 -11   13.70    1.02
  -6  -2  11   11.41    1.30
  -6   2 -11   12.87    1.09
   6   2  11   13.44    1.21
   6  -3  11   35.09    1.96
  -6  -3 -11   35.88    1.74
   6   3 -11   37.48    1.88
  -6   3  11   39.10    1.69
  -6  -3  11   33.96    2.15
   6  -3 -11   38.08    1.81
  -6   3 -11   37.26    1.84
   6   3  11   37.70    2.11
  -6   4  11    4.95    0.80
   6   4 -11    6.38    1.02
  -6  -4 -11    5.70    0.97
   6  -4  11    3.98    1.03
   6   4  11    4.08    1.12
  -6   4 -11    5.77    0.95
  -6  -4  11    4.88    1.28
   6  -4 -11    6.16    1.00
   6  -5  11    2.77    1.09
  -6   5  11    1.27    0.73
   6   5 -11    1.16    0.92
   6   5  11    0.68    1.33
  -6   5 -11    1.51    0.91
   6  -5 -11    1.46    0.98
  -6  -5  11    2.80    1.26
  -6  -6  11    1.89    1.47
   6   0 -12   76.53    2.87
  -6   0  12   71.43    3.04
  -6   0 -12   76.99    2.85
   6   0  12   76.29    2.96
   6  -1  12   20.69    1.55
  -6   1  12   18.71    1.46
   6   1 -12   17.07    1.30
  -6  -1 -12   20.65    1.45
  -6   1 -12   18.58    1.45
   6  -1 -12   19.02    1.40
  -6  -1  12   18.52    1.54
   6   1  12   19.44    1.48
  -6  -2 -12   28.94    1.61
   6  -2  12   29.57    1.84
  -6   2  12   31.93    1.95
   6   2 -12   26.65    1.72
   6  -2 -12   29.52    1.67
   6   2  12   28.47    1.95
  -6  -2  12   30.10    2.01
  -6   2 -12   29.72    1.72
  -6   3  12   11.33    1.08
  -6  -3 -12   12.13    1.10
   6   3 -12   10.27    1.18
   6  -3  12    9.93    1.20
  -6   3 -12   10.10    1.13
   6   3  12   10.16    1.30
  -6  -3  12   10.94    1.46
   6  -3 -12   11.96    1.14
   6  -4  12   11.18    1.31
   6   4 -12   10.62    1.22
  -6   4  12   11.36    1.10
  -6   4 -12   15.75    1.46
   6  -4 -12   11.23    1.24
   6  -5  12    2.12    1.19
  -6   5  12    1.95    0.86
   6   5 -12    2.13    1.05
  -6   5 -12    2.28    1.06
   6   5  12    0.83    1.36
  -6  -5  12    2.83    1.45
   6  -5 -12    2.32    1.13
  -6   0 -13   16.62    1.31
   6   0 -13   20.90    1.47
   6   0  13   14.08    1.35
  -6   0  13   16.95    1.57
  -6  -1 -13    8.20    1.06
   6  -1  13    9.82    1.24
  -6   1  13    9.45    1.30
   6   1 -13    8.95    1.13
  -6   1 -13    8.51    1.10
   6  -1 -13   10.08    1.11
   6   1  13    8.23    1.23
  -6  -1  13    8.98    1.34
   6   2 -13   10.03    1.21
  -6   2  13   12.32    1.43
  -6  -2 -13   10.97    1.15
   6  -2  13    8.58    1.24
  -6  -2  13   11.58    1.47
   6  -2 -13   10.34    1.16
   6   2  13    8.06    1.32
  -6   2 -13   10.42    1.19
  -6  -3 -13    3.54    0.96
  -6   3  13    1.77    0.89
   6  -3  13    3.43    1.27
   6   3 -13    1.97    1.05
   6   3  13    1.86    1.24
  -6   3 -13    3.63    1.06
  -6  -3  13    4.07    1.40
   6  -4  13    5.28    1.23
  -6   4  13    4.10    1.11
   6   4 -13    4.47    1.18
   6  -4 -13    5.04    2.07
  -6   4 -13    5.54    1.17
  -6  -4  13    5.19    1.50
   6   4  13    5.50    1.52
  -6   0  14   14.68    1.61
   6   0  14   11.66    1.40
   6   0 -14   12.61    1.32
  -6  -1 -14   22.59    1.63
  -6   1  14   18.15    1.69
   6   1 -14   16.40    1.47
   6  -1  14   14.35    1.50
   6   1  14   17.61    1.63
   6  -1 -14   17.97    1.50
  -6   1 -14   19.66    1.54
  -6  -2 -14   52.02    2.42
   6  -2  14   51.92    2.66
  -6   2 -14   49.83    2.50
  -6  -2  14   49.76    2.99
   6   2  14   48.77    2.78
   6  -2 -14   52.28    2.45
  -7   0   0    0.34    0.28
   7   0   0    0.10    0.27
   7   0   0    0.16    0.28
  -7   0   0   -0.27    0.24
  -7  -1   0   55.84    1.85
   7  -1   0   62.61    2.08
  -7   1   0   59.65    1.85
  -7  -1   0   58.23    1.95
   7   1   0   57.22    1.92
  -7   1   0   53.23    1.88
  -7   1   0   60.34    1.93
   7   1   0   56.00    1.82
  -7   2   0   -0.04    0.29
  -7  -2   0    0.18    0.32
   7   2   0    0.13    0.37
  -7  -2   0    0.02    0.26
   7  -2   0    0.03    0.34
  -7   2   0    0.11    0.23
   7   2   0    0.04    0.23
  -7  -3   0   23.91    1.14
  -7  -3   0   24.69    0.97
  -7   3   0   23.69    1.03
  -7   3   0   25.43    0.97
   7  -3   0   26.14    1.14
   7   3   0   24.94    1.14
  -7  -4   0    0.41    0.34
   7  -4   0    0.58    0.46
  -7   4   0    0.34    0.38
  -7  -4   0    0.51    0.47
   7   4   0   -0.32    0.53
  -7   4   0    0.57    0.37
   7   5   0    1.67    0.71
  -7  -5   0    1.45    0.48
  -7   5   0    1.20    0.45
  -7  -5   0    1.52    0.62
   7  -5   0    1.68    0.79
  -7   5   0    1.42    0.43
   7  -6   0    0.80    0.67
   7   6   0    0.46    0.74
  -7   6   0    1.59    0.56
  -7  -6   0    1.66    0.57
  -7  -6   0    2.16    0.75
  -7  -7   0    2.91    1.27
  -7   7   0    1.83    0.70
   7   7   0    2.03    0.88
   7  -7   0    1.49    0.83
  -7   8   0    3.39    0.87
   7   8   0    3.36    1.10
   7  -8   0    1.97    0.97
   7   0  -1   -0.09    0.29
  -7   0   1    0.16    0.28
  -7   0   1    0.12    0.23
  -7   0  -1   -0.07    0.27
   7   0   1   -0.18    0.26
  -7   0  -1   -0.01    0.31
   7   0   1    0.01    0.32
   7   0   1    0.23    0.30
   7   0  -1   -0.18    0.27
  -7   1   1    0.18    0.25
   7  -1   1    0.28    0.27
  -7   1   1    0.11    0.30
  -7  -1  -1    0.12    0.31
   7   1  -1    0.61    0.36
   7   1  -1    0.46    0.20
  -7   1   1    0.13    0.27
  -7  -1  -1    0.53    0.31
   7  -1   1    0.12    0.29
   7  -1   1    0.14    0.36
   7   1   1    0.60    0.32
  -7  -1   1    0.27    0.21
   7   1   1    0.75    0.27
   7  -1  -1    0.32    0.30
  -7  -1   1    0.04    0.29
  -7   1  -1    0.56    0.30
   7  -2   1   88.64    2.95
  -7  -2  -1   92.15    2.91
   7   2  -1   93.16    2.92
   7   2  -1   91.14    2.72
  -7   2   1   90.42    2.84
  -7   2   1   89.75    2.80
  -7   2  -1   91.11    2.86
   7   2   1   91.70    2.81
   7   2   1   90.05    2.88
   7  -2  -1   92.48    2.87
  -7   2  -1   93.85    2.77
  -7  -2   1   85.32    2.72
  -7  -2   1   88.14    2.94
   7  -3   1   43.13    1.63
  -7  -3  -1   39.06    1.55
   7   3  -1   42.38    1.61
  -7   3   1   40.37    1.44
  -7   3   1   43.32    1.46
   7  -3  -1   40.41    1.55
  -7  -3   1   41.69    1.62
  -7  -3   1   39.77    1.35
   7   3   1   42.22    1.49
   7   3   1   43.36    1.59
  -7  -3   1   41.65    1.35
  -7   3  -1   41.74    1.47
  -7   3  -1   41.05    1.40
  -7   4   1   87.98    2.69
   7  -4   1   86.74    2.91
   7   4  -1   84.00    2.88
  -7  -4  -1   86.53    2.74
  -7  -4  -1   80.49    2.85
  -7   4   1   87.64    2.75
   7  -4  -1   87.74    2.87
  -7   4  -1   82.32    2.72
  -7  -4   1   84.38    2.67
  -7  -4   1   88.41    2.94
   7   4   1   86.23    2.88
  -7   4  -1   86.25    2.71
   7   5  -1   51.32    2.46
  -7   5   1   55.64    1.87
  -7  -5  -1   53.45    2.01
  -7  -5  -1   51.42    1.87
  -7   5  -1   49.15    1.82
  -7   5  -1   50.16    1.80
  -7  -5   1   57.62    2.11
   7  -5  -1   49.99    2.15
  -7  -5   1   51.28    1.81
   7   5   1   52.39    2.02
  -7  -6  -1   75.20    2.72
  -7   6   1   74.16    2.59
   7   6  -1   77.02    2.78
  -7  -6  -1   72.74    2.61
   7  -6   1   75.04    2.80
   7   6   1   74.83    2.74
  -7   6  -1   74.01    2.75
   7  -6  -1   78.08    2.80
  -7  -6   1   76.00    2.81
   7  -7   1   30.14    1.76
  -7   7   1   31.87    1.55
   7   7  -1   30.03    1.73
  -7   7  -1   31.78    1.51
   7   7   1   32.43    1.83
   7  -7  -1   30.90    1.80
  -7   8   1   40.80    1.94
   7   8  -1   40.78    2.17
   7  -8   1   41.37    2.29
  -7   8  -1   37.28    1.89
   7   8   1   43.28    2.24
   7  -8  -1   40.77    2.22
   7   0  -2    0.09    0.30
   7   0   2   -0.20    0.23
  -7   0   2   -0.10    0.22
  -7   0   2    0.29    0.31
   7   0   2    0.13    0.29
   7   0  -2    0.32    0.27
   7   0   2    0.08    0.30
  -7   0  -2    0.26    0.30
  -7  -1  -2    2.93    0.36
  -7   1   2    2.93    0.39
  -7  -1  -2    2.55    0.40
  -7   1   2    3.00    0.36
   7  -1   2    2.65    0.30
   7  -1   2    2.71    0.31
   7   1  -2    2.84    0.44
   7  -1   2    2.65    0.46
  -7   1  -2    2.80    0.38
  -7  -1   2    2.24    0.42
  -7  -1   2    2.57    0.21
   7   1   2    2.82    0.37
   7  -1  -2    2.77    0.34
  -7   2   2   11.48    0.68
   7   2  -2   11.09    0.77
  -7   2   2   11.44    0.62
   7  -2   2   10.63    0.60
  -7  -2  -2   11.04    0.72
   7  -2   2   12.49    0.87
   7   2   2   10.73    0.71
   7  -2  -2   10.38    0.66
  -7   2  -2   11.35    0.68
  -7  -2   2   10.56    0.81
   7   2   2   11.98    0.67
  -7   2  -2   10.68    0.52
   7   3  -2   74.09    2.43
  -7  -3  -2   69.60    2.34
   7  -3   2   70.15    2.46
  -7   3   2   68.04    2.25
  -7   3   2   68.94    2.25
   7   3   2   69.27    2.34
  -7  -3   2   67.21    2.10
   7   3   2   69.77    2.32
  -7   3  -2   67.65    2.18
   7  -3  -2   69.29    2.33
  -7  -3   2   73.39    2.47
  -7   3  -2   72.71    2.29
   7   4  -2   21.40    1.19
  -7  -4  -2   21.63    1.08
  -7   4   2   21.26    1.00
   7  -4   2   20.74    1.24
  -7   4  -2   21.45    0.93
  -7   4  -2   21.63    0.99
  -7  -4   2   20.03    0.84
  -7  -4   2   22.49    1.23
   7  -4  -2   22.32    1.12
   7   4   2   20.34    1.09
   7  -5   2    6.76    0.83
  -7  -5  -2    8.94    0.79
  -7  -5  -2    7.58    0.68
   7   5  -2    9.08    0.89
  -7   5   2    8.00    0.68
  -7   5  -2    8.25    0.63
  -7   5  -2    7.41    0.64
   7   5   2    8.67    0.82
   7  -5  -2   10.08    1.18
  -7  -5   2    7.65    0.86
  -7   6   2    9.98    0.81
  -7  -6  -2    9.22    0.80
  -7  -6  -2    9.36    0.91
   7   6  -2    8.07    0.96
   7  -6   2    6.24    0.85
   7   6   2    7.96    0.91
  -7  -6   2    8.60    1.01
  -7   6  -2    7.25    0.72
   7  -6  -2    8.26    0.89
  -7   7   2    9.19    0.89
   7   7  -2    6.20    1.02
   7  -7   2    7.85    1.07
  -7  -7  -2    8.85    0.91
   7  -7  -2    8.19    1.03
  -7  -7   2    8.09    1.26
  -7   7  -2    7.08    0.82
   7   7   2    7.97    1.04
   7   8  -2    5.42    1.15
   7  -8   2    6.06    1.18
  -7   8   2    5.28    0.94
  -7  -8  -2    5.18    1.23
   7  -8  -2    8.37    1.23
   7   8   2    6.05    1.14
  -7   8  -2    7.00    0.98
   7   0  -3    0.26    0.23
  -7   0   3    0.05    0.22
   7   0   3    0.35    0.35
   7   0   3   -0.35    0.26
   7   0   3    0.11    0.22
   7   0  -3   -0.12    0.31
  -7   0  -3    0.09    0.29
  -7   0   3   -0.12    0.33
  -7   1   3    9.75    0.61
  -7   1   3   10.82    0.70
  -7   1   3   10.89    0.61
   7   1  -3   10.02    0.70
   7  -1   3   11.18    0.80
   7  -1   3    9.44    0.47
  -7  -1  -3   10.35    0.67
  -7  -1  -3    8.64    0.55
   7  -1   3   10.33    0.51
   7  -1  -3    9.81    0.56
  -7   1  -3   10.05    0.65
   7   1   3   10.26    0.61
  -7  -1   3    9.49    0.76
   7   1   3    9.41    0.67
   7  -2   3    4.77    0.61
  -7   2   3    5.60    0.51
  -7  -2  -3    4.12    0.50
   7   2  -3    4.34    0.57
  -7   2   3    5.78    0.47
  -7   2  -3    5.21    0.34
  -7  -2   3    4.37    0.59
   7  -2  -3    4.75    0.45
  -7   2  -3    4.41    0.46
   7   2   3    5.15    0.50
   7   2   3    4.71    0.49
   7   3  -3   51.32    1.87
  -7  -3  -3   50.36    1.78
   7  -3   3   49.60    1.99
  -7   3   3   47.57    1.69
  -7   3   3   48.42    1.71
   7   3   3   47.65    1.75
  -7   3  -3   49.88    1.78
   7  -3  -3   48.54    1.77
   7   3   3   49.44    1.79
  -7   3  -3   50.74    1.74
  -7  -3   3   50.30    1.93
  -7   4   3   86.38    2.75
  -7  -4  -3   83.37    2.78
  -7   4   3   79.23    2.69
   7  -4   3   83.93    2.99
   7   4  -3   86.85    2.90
  -7   4  -3   85.60    2.65
  -7  -4   3   83.14    2.96
   7   4   3   87.62    2.87
   7  -4  -3   87.48    2.85
  -7   4  -3   82.10    2.73
   7   4   3   84.42    2.82
  -7  -5  -3   14.58    1.01
   7  -5   3   15.08    1.24
  -7  -5  -3   16.04    0.97
  -7   5   3   15.29    0.95
   7   5  -3   17.39    1.18
   7   5   3   13.74    1.05
  -7   5  -3   14.87    0.93
  -7  -5   3   14.87    1.11
  -7   5  -3   13.99    0.85
  -7   6   3   45.66    1.85
  -7  -6  -3   49.34    2.08
   7  -6   3   47.90    2.23
   7   6  -3   46.14    2.11
  -7  -6  -3   48.97    1.97
  -7   6  -3   50.76    1.85
   7   6   3   48.18    2.01
  -7   6  -3   49.34    1.82
   7  -6  -3   48.53    2.07
  -7   7   3   14.22    1.08
   7   7  -3   18.63    1.36
   7  -7   3   17.40    1.44
  -7  -7  -3   18.31    1.36
  -7   7  -3   16.26    1.16
   7   7   3   13.55    1.20
   7  -7  -3   17.43    1.43
  -7  -7   3   16.21    1.48
   7   8  -3   32.01    2.27
  -7   8   3   28.13    1.63
  -7  -8  -3   29.68    1.84
   7  -8   3   25.58    2.05
   7   8   3   32.03    1.94
  -7   8  -3   30.37    1.68
   7  -8  -3   29.63    1.98
  -7   0   4   -0.02    0.37
   7   0   4   -0.12    0.19
   7   0  -4   -0.30    0.33
  -7   0  -4    0.18    0.31
   7   0  -4    0.07    0.21
   7   0   4    0.15    0.25
   7   0   4   -0.39    0.36
   7   0  -4    0.00    0.23
   7  -1   4   84.42    2.75
  -7   1   4   85.55    2.71
  -7  -1  -4   82.16    2.67
  -7  -1  -4   80.65    2.55
   7  -1   4   76.66    2.46
  -7   1   4   82.39    2.63
  -7   1   4   80.64    2.57
   7   1  -4   83.93    2.71
   7  -1   4   82.31    2.45
   7   1   4   83.41    2.53
   7  -1  -4   84.22    2.55
   7   1   4   81.72    2.68
  -7  -1   4   82.86    2.77
  -7   1  -4   80.71    2.66
   7   2  -4   22.82    1.19
  -7  -2  -4   26.78    1.15
  -7   2   4   26.38    1.06
  -7   2   4   26.91    1.12
   7  -2   4   28.69    0.97
   7  -2   4   25.52    1.31
  -7  -2   4   26.68    1.30
  -7   2  -4   25.54    0.90
  -7   2  -4   26.64    1.12
   7  -2  -4   27.62    1.08
   7   2   4   26.12    1.17
   7   2   4   26.74    1.05
   7   3  -4   14.74    1.00
  -7   3   4   13.71    0.80
  -7  -3  -4   14.11    0.89
   7  -3   4   14.17    1.10
  -7   3   4   14.28    0.81
   7  -3  -4   15.01    0.86
  -7  -3   4   15.19    1.09
   7   3   4   14.14    0.93
  -7   3  -4   14.95    0.85
   7   3   4   15.48    0.86
  -7   3  -4   14.74    0.62
  -7  -4  -4   36.79    1.49
  -7   4   4   37.13    1.42
   7  -4   4   35.96    1.77
   7   4  -4   38.24    1.64
  -7   4   4   36.36    1.43
  -7   4  -4   36.69    1.31
   7   4   4   36.94    1.53
  -7   4  -4   36.95    1.47
   7  -4  -4   38.24    1.54
   7   4   4   37.19    1.60
  -7  -4   4   36.44    1.73
   7  -5   4   63.43    2.60
   7   5  -4   60.58    2.45
  -7  -5  -4   63.71    2.32
  -7  -5  -4   60.31    2.28
  -7   5   4   67.31    2.29
  -7   5  -4   64.27    2.13
  -7   5  -4   66.94    2.26
   7   5   4   63.85    2.34
   7  -5  -4   66.05    2.39
  -7   6   4   17.35    1.10
   7  -6   4   15.50    1.31
  -7  -6  -4   16.31    1.30
   7   6  -4   17.25    1.25
  -7  -6  -4   16.52    1.18
   7  -6  -4   17.65    1.31
   7   6   4   17.16    1.22
  -7   6  -4   16.25    1.03
  -7   6  -4   19.28    1.18
  -7  -6   4   18.98    1.46
   7  -7   4   33.44    2.14
  -7  -7  -4   35.15    1.78
   7   7  -4   34.94    1.98
  -7   7   4   33.38    1.66
  -7  -7   4   31.61    2.16
   7  -7  -4   36.19    1.88
   7   7   4   32.98    1.87
   7   8  -4    4.56    1.59
  -7   8   4    4.51    1.61
  -7  -8  -4    3.42    1.04
   7   8   4    2.60    1.11
   7   0   5   -0.04    0.15
  -7   0  -5    0.02    0.33
   7   0   5    0.14    0.40
   7   0  -5   -0.03    0.37
   7   0  -5   -0.01    0.22
   7   0   5    0.25    0.20
   7   0  -5    0.07    0.27
  -7   0   5   -0.09    0.42
  -7  -1  -5   14.16    0.82
  -7   1   5   14.72    0.91
   7   1  -5   14.84    0.89
  -7   1   5   15.66    0.79
   7  -1   5   13.97    0.96
   7   1   5   14.59    0.91
   7  -1  -5   14.03    0.81
   7  -1  -5   13.80    0.69
  -7   1  -5   13.14    0.83
  -7  -1   5   14.80    0.99
   7   1   5   14.42    0.65
   7  -2   5   26.90    1.32
  -7  -2  -5   25.30    1.15
   7  -2   5   26.82    0.86
   7   2  -5   22.99    1.22
  -7   2   5   26.76    1.17
  -7   2   5   24.64    1.10
   7   2   5   27.12    1.05
  -7   2  -5   28.19    1.18
  -7  -2   5   28.62    1.36
   7   2   5   24.16    1.21
   7  -2  -5   26.79    1.09
   7  -3   5    3.90    0.74
  -7   3   5    4.77    0.51
  -7  -3  -5    5.41    0.61
   7   3  -5    6.45    0.74
  -7   3   5    4.87    0.56
   7   3   5    6.29    0.59
  -7   3  -5    5.39    0.58
   7  -3  -5    5.24    0.58
  -7  -3   5    4.02    0.70
   7   3   5    5.66    0.67
  -7   3  -5    5.21    0.35
   7  -4   5   15.97    1.27
  -7  -4  -5   15.96    1.00
  -7   4   5   16.49    0.95
   7   4  -5   18.26    1.18
   7   4   5   17.02    1.01
   7   4   5   17.44    1.14
   7  -4  -5   16.76    1.04
  -7   4  -5   15.30    0.98
  -7   5   5   27.86    1.29
   7   5  -5   27.96    1.51
  -7  -5  -5   28.10    1.31
   7  -5   5   23.78    1.66
  -7  -5  -5   28.87    1.45
   7   5   5   28.01    1.37
  -7  -5   5   25.32    1.77
   7  -5  -5   28.01    1.44
  -7   5  -5   27.95    1.34
  -7   6   5   27.85    1.38
   7   6  -5   27.37    1.63
  -7  -6  -5   28.11    1.50
   7  -6   5   26.69    1.91
   7  -6  -5   29.85    1.60
  -7  -6   5   25.59    1.88
  -7   6  -5   28.14    1.60
   7   6   5   25.41    1.54
   7  -7   5   12.82    1.51
  -7   7   5   13.83    1.08
  -7  -7  -5   15.09    1.22
   7   7  -5   15.31    1.36
   7  -7  -5   13.27    1.23
   7   7   5   12.28    1.21
  -7  -7   5   15.85    1.50
  -7  -8  -5    7.41    1.19
   7   8  -5    7.08    1.31
   7  -8   5    7.16    1.53
  -7   8   5    7.73    1.08
  -7  -8   5    7.67    2.43
   7   8   5    8.62    1.35
   7  -8  -5    7.65    1.27
   7   0   6   -0.04    0.41
  -7   0  -6    0.00    0.38
  -7   0   6   -0.09    0.47
   7   0  -6    0.10    0.26
   7   0  -6    0.02    0.41
  -7  -1  -6    7.12    0.64
   7  -1   6    5.70    0.67
  -7   1   6    6.44    0.69
   7   1  -6    7.12    0.67
  -7   1   6    5.81    0.57
   7   1   6    6.37    0.67
   7   1   6    6.44    0.44
  -7  -1   6    5.49    0.72
   7  -1  -6    6.80    0.59
  -7   1  -6    6.96    0.62
  -7  -2  -6   30.33    1.29
  -7   2   6   29.11    1.24
   7   2  -6   30.10    1.40
   7  -2   6   27.14    1.42
   7  -2  -6   32.26    1.24
   7   2   6   29.43    1.38
  -7   2  -6   30.94    1.33
   7  -3   6   64.07    2.60
  -7   3   6   64.48    2.29
  -7  -3  -6   61.75    2.24
   7   3  -6   69.69    2.40
  -7   3   6   61.84    2.22
  -7  -3   6   67.70    2.67
   7   3   6   62.95    2.14
   7  -3  -6   63.22    2.23
  -7   3  -6   65.11    2.25
   7   3   6   59.21    2.34
  -7   4   6   12.05    0.88
  -7  -4  -6   12.57    0.97
   7  -4   6   11.01    1.05
   7   4  -6   12.52    1.00
  -7  -4   6   15.64    1.26
   7   4   6   13.95    0.88
   7  -4  -6   12.40    0.99
  -7   4  -6   13.31    0.99
   7   5  -6   55.23    2.24
  -7  -5  -6   53.21    2.06
  -7   5   6   53.62    2.04
   7  -5   6   53.84    2.44
  -7  -5   6   54.97    2.43
   7  -5  -6   56.64    2.18
  -7   5  -6   53.88    2.09
   7   5   6   55.50    2.11
   7   5   6   55.27    2.34
  -7  -6  -6   31.03    1.66
  -7   6   6   31.36    1.53
   7  -6   6   32.96    2.08
   7   6  -6   34.25    1.80
   7  -6  -6   31.46    1.73
  -7   6  -6   30.86    1.59
  -7  -6   6   33.09    2.09
   7   6   6   32.80    1.67
   7   7  -6   32.67    1.95
  -7  -7  -6   31.98    1.83
  -7   7   6   31.10    1.64
   7  -7   6   30.34    2.28
   7   7   6   31.32    1.83
  -7  -7   6   30.95    2.31
   7  -7  -6   32.75    1.93
  -7   8   6    2.48    0.94
   7   8  -6    3.38    1.29
   7  -8   6    3.69    1.52
  -7  -8  -6    3.36    1.21
  -7  -8   6    3.97    1.54
   7  -8  -6    3.71    1.15
   7   0  -7    0.25    0.32
  -7   0  -7    0.14    0.43
   7   0   7   -0.06    0.50
   7   0  -7   -0.34    0.46
  -7   0   7    0.13    0.61
  -7  -1  -7    3.26    0.54
  -7   1   7    2.95    0.66
  -7   1   7    3.47    0.54
   7   1  -7    3.42    0.63
   7  -1   7    4.20    0.68
  -7  -1   7    3.36    0.78
   7  -1  -7    3.28    0.45
  -7   1  -7    3.86    0.57
   7   1   7    3.19    0.59
   7  -2   7    4.52    0.80
  -7   2   7    5.78    0.71
  -7  -2  -7    5.07    0.61
   7   2  -7    4.76    0.71
  -7   2   7    5.64    0.59
   7   2   7    6.53    0.55
   7   2   7    5.73    0.72
   7  -2  -7    5.83    0.59
  -7   2  -7    4.87    0.62
  -7  -2   7    4.55    0.96
   7  -3   7    0.80    0.66
  -7  -3  -7    1.41    0.52
   7   3  -7    1.27    0.65
  -7   3   7    1.09    0.58
  -7   3   7    0.85    0.44
   7  -3  -7    0.81    0.51
  -7   3  -7    0.78    0.61
   7   3   7    1.01    0.46
  -7  -3   7    1.95    0.79
   7   3   7    0.44    1.04
  -7  -4  -7    4.46    0.67
   7  -4   7    4.23    0.90
  -7   4   7    5.18    0.65
   7   4  -7    4.26    0.78
   7   4   7    4.70    0.83
  -7   4  -7    3.84    0.65
   7   4   7    4.51    0.65
  -7  -4   7    3.63    0.92
   7  -4  -7    4.79    0.77
  -7  -5  -7    5.87    0.77
   7  -5   7    4.90    0.98
   7   5  -7    5.11    0.91
  -7   5   7    5.53    0.72
   7   5   7    6.96    1.42
   7  -5  -7    4.52    0.80
  -7   5  -7    5.86    0.77
   7   5   7    5.85    1.00
  -7  -5   7    5.17    1.05
  -7   6   7   14.24    1.05
  -7  -6  -7   16.43    1.25
   7   6  -7   15.67    1.31
   7  -6   7   13.94    1.39
   7   6   7   15.00    1.15
  -7   6  -7   15.37    1.13
   7  -6  -7   15.09    1.23
  -7  -6   7   13.20    1.45
  -7   7   7    3.04    1.53
   7  -7   7    2.64    1.25
   7   7  -7    2.83    1.10
  -7  -7  -7    3.47    0.97
   7   7   7    3.50    1.02
   7  -7  -7    3.95    1.05
  -7  -7   7    2.99    1.34
  -7   0   8   -0.01    0.63
   7   0  -8    0.14    0.56
   7   0   8    0.17    0.74
   7  -1   8   12.11    0.97
  -7  -1  -8   14.24    1.11
  -7   1   8   14.39    1.11
   7   1  -8   14.97    1.26
   7  -1  -8   13.28    0.84
  -7   1  -8   13.49    0.99
   7   1   8   14.05    1.13
   7   2  -8   23.46    1.31
   7  -2   8   21.44    1.36
  -7   2   8   23.14    1.16
  -7   2   8   22.85    1.30
  -7  -2  -8   21.13    1.20
  -7  -2   8   22.48    1.49
   7   2   8   22.61    1.31
  -7   2  -8   21.57    1.22
   7  -2  -8   22.47    1.13
   7   3  -8   31.49    1.59
   7  -3   8   29.82    1.65
  -7  -3  -8   30.64    1.43
  -7   3   8   31.51    1.50
  -7   3   8   30.31    1.39
  -7  -3   8   32.99    1.73
  -7   3  -8   31.18    1.48
   7   3   8   31.09    1.63
   7  -3  -8   30.46    1.45
   7  -4   8   29.35    1.69
  -7  -4  -8   29.88    1.46
  -7   4   8   26.61    1.34
   7   4  -8   30.32    1.67
   7   4   8   30.58    1.72
  -7  -4   8   28.58    1.79
   7  -4  -8   29.86    1.51
   7   4   8   31.86    1.38
  -7   4  -8   29.91    1.50
   7   5  -8  111.67    3.85
  -7   5   8  108.29    3.67
   7  -5   8  108.72    4.00
  -7   5  -8  109.62    3.71
  -7  -5   8  105.51    4.03
   7  -5  -8  110.58    3.78
   7   5   8  106.70    3.99
   7   5   8  115.17    3.83
  -7   6   8   13.09    1.06
  -7  -6  -8   12.87    1.22
   7  -6   8   14.24    1.48
   7   6  -8   13.74    1.30
   7  -6  -8   17.55    1.35
  -7   6  -8   14.09    1.16
   7   6   8   15.90    1.19
  -7  -6   8   11.31    1.47
  -7   7   8   29.46    1.70
   7  -7   8   30.18    2.34
   7   7   8   28.15    1.91
  -7   7  -8   28.12    1.95
  -7  -7   8   19.23    1.94
  -7   0  -9    0.00    0.53
   7   0   9   -0.28    0.58
  -7   0   9    0.00    0.72
   7   0  -9    0.12    0.57
  -7  -1  -9    0.63    0.55
   7  -1   9    0.64    0.60
  -7   1   9    1.01    0.70
   7   1  -9    0.93    0.63
  -7  -1   9    0.77    0.71
   7   1   9    0.45    0.57
   7  -1  -9    0.67    0.69
  -7   1  -9    0.07    0.54
   7  -1  -9    0.29    0.56
   7   2  -9    9.07    0.95
  -7   2   9    9.05    0.94
  -7  -2  -9    7.98    0.79
   7  -2   9    9.20    0.99
  -7   2   9   10.67    0.86
  -7  -2   9    9.98    1.11
  -7   2  -9    7.77    0.82
   7  -2  -9    9.28    0.79
   7   2   9    8.15    0.92
  -7   3   9    5.25    0.71
   7   3  -9    6.01    0.89
  -7  -3  -9    4.33    0.68
  -7   3   9    5.61    0.82
   7  -3   9    4.39    0.84
  -7  -3   9    3.70    0.99
  -7   3  -9    4.52    0.75
   7   3   9    5.05    0.94
   7  -3  -9    4.77    0.74
  -7  -4  -9    7.34    0.84
   7  -4   9    5.53    0.98
   7   4  -9    5.93    0.94
  -7   4   9    6.40    0.76
   7   4   9    7.74    1.11
  -7   4  -9    7.08    0.87
  -7  -4   9    6.61    1.12
   7  -4  -9    7.27    0.91
   7  -5   9    5.25    1.10
  -7   5   9    4.51    0.78
   7   5  -9    6.08    1.01
   7   5   9    3.73    1.09
  -7  -5   9    4.02    1.20
   7  -5  -9    5.17    0.97
  -7   5  -9    5.83    0.92
   7  -6   9    5.31    1.19
   7   6  -9    7.02    1.18
  -7  -6  -9    4.23    1.04
  -7   6   9    6.37    1.02
  -7   6  -9    5.60    1.04
   7  -6  -9    6.09    1.09
  -7  -6   9    5.85    1.42
   7   0 -10    0.24    0.66
  -7   0  10   -0.07    0.75
   7   0  10   -0.07    0.66
  -7   0 -10    0.23    0.61
   7   1 -10    0.42    0.64
  -7  -1 -10    0.37    0.62
  -7   1  10    0.44    0.76
   7  -1  10    0.34    0.69
  -7   1 -10    0.44    0.63
  -7  -1  10   -0.07    0.76
   7  -1 -10    0.91    0.64
   7   1  10    0.98    0.67
   7  -2  10    1.79    0.75
   7   2 -10    1.46    0.75
  -7   2  10    1.53    0.79
  -7   2  10    1.90    0.65
  -7  -2 -10    1.50    0.65
  -7  -2  10    0.97    0.86
   7  -2 -10    1.59    0.65
   7   2  10    1.15    0.78
  -7   2 -10    2.07    0.69
  -7  -3 -10    9.88    0.94
   7   3 -10    8.94    1.02
  -7   3  10    7.94    0.86
   7  -3  10    7.85    1.04
  -7   3 -10   10.63    0.99
   7   3  10    8.71    1.08
   7  -3 -10   10.78    0.99
  -7  -3  10   10.25    1.26
   7   4 -10    9.36    1.11
  -7   4  10   13.48    1.04
  -7  -4 -10   11.57    1.03
   7  -4  10   11.13    1.22
  -7  -4  10   11.19    1.43
   7   4  10    9.95    1.25
  -7   4 -10   11.22    1.06
   7  -4 -10   12.16    1.13
   7   5 -10    7.32    1.10
  -7   5  10    6.82    0.89
   7  -5  10    7.66    1.21
   7  -5 -10    9.13    1.14
  -7  -5  10    6.57    1.40
  -7   5 -10    9.55    1.09
   7   5  10    7.74    1.35
   7   6 -10   20.93    1.67
  -7  -6 -10   21.68    1.68
   7  -6  10   22.90    1.82
  -7   6  10   20.53    1.42
  -7   6 -10   23.38    1.81
   7  -6 -10   24.65    1.73
  -7  -6  10   17.78    1.93
   7   0 -11   -0.54    0.72
  -7   0  11   -0.13    0.86
   7   0  11    0.33    0.75
  -7   0 -11    0.00    0.68
  -7   1  11    0.61    0.85
   7   1 -11    1.54    0.77
  -7  -1 -11    1.00    0.71
   7  -1  11    0.75    0.80
  -7  -1  11    0.69    0.92
   7  -1 -11    1.06    0.73
   7   1  11    0.27    0.75
  -7   1 -11    0.77    0.71
   7  -2  11   11.78    1.17
  -7  -2 -11   15.47    1.14
  -7   2  11   14.45    1.27
   7   2 -11   14.28    1.21
   7   2  11   13.02    1.25
  -7  -2  11   13.50    1.37
  -7   2 -11   11.58    1.08
   7   3 -11   16.48    1.33
  -7   3  11   14.86    1.13
   7  -3  11   18.44    1.44
  -7  -3 -11   17.13    1.21
  -7  -3  11   15.55    1.54
  -7   3 -11   14.95    1.23
   7  -3 -11   17.66    1.31
   7   3  11   14.62    1.39
  -7   4  11   21.45    1.50
   7  -4  11   22.98    1.85
   7   4 -11   26.14    1.78
  -7  -4 -11   21.10    1.53
   7   4  11   18.59    1.65
  -7  -4  11   22.18    1.83
  -7   4 -11   22.92    1.63
   7  -4 -11   24.03    1.69
   7   5 -11    4.07    1.09
  -7   5  11    4.78    1.45
   7  -5  11    4.90    2.17
   7  -5 -11    4.83    1.13
  -7  -5  11    5.07    1.44
   7   5  11    2.99    1.36
  -7   5 -11    5.29    1.31
   7   0 -12    0.08    0.85
  -7   0  12   -0.30    0.98
  -7   0 -12    0.23    0.78
   7   0  12   -0.03    0.77
   7   1 -12    2.26    0.90
  -7  -1 -12    2.66    0.85
  -7   1  12    2.12    1.03
   7  -1  12    3.46    1.00
   7   1  12    0.75    0.88
   7  -1 -12    2.51    0.85
  -7   1 -12    3.35    0.87
  -7  -1  12    2.68    1.12
   7   2 -12    8.58    1.10
  -7  -2 -12    7.57    1.00
  -7   2  12    7.93    1.19
   7  -2  12    6.67    1.12
  -7  -2  12    6.64    1.30
   7   2  12    5.01    1.13
  -7   2 -12    7.77    1.03
   7  -2 -12    6.96    1.01
  -7  -3 -12   19.69    1.35
  -7   3  12   17.03    1.26
   7   3 -12   16.86    1.42
   7  -3  12   15.41    1.40
  -7  -3  12   18.28    1.74
   7   3  12   18.28    1.62
  -7   3 -12   21.31    1.45
  -7   4  12   15.51    1.92
   7  -4  12   10.72    1.75
   7   4 -12    9.98    1.28
  -7   4 -12   13.83    1.36
   7   4  12   11.80    1.56
  -7  -4  12   13.38    1.69
   7   0  13   -0.28    0.98
   7   0 -13   -0.69    0.94
  -7   0  13   -0.52    1.13
  -7   0 -13   -0.31    0.87
   7  -1  13    7.19    1.21
  -7  -1 -13    6.73    1.07
   7   1 -13    5.42    1.09
  -7   1  13    6.20    1.32
   7  -1 -13    5.84    1.09
  -7   1 -13    6.34    1.11
   7   1  13    6.26    1.34
  -7  -1  13    7.08    1.35
   7   2 -13   13.70    1.38
  -7  -2 -13   17.81    1.34
  -7   2 -13   15.59    1.62
   7  -2 -13   13.68    1.30
   7   2  13   14.99    1.65
   7   3 -13    9.69    1.35
   7  -3  13   10.04    1.41
  -7  -3 -13   13.70    1.31
  -7   3  13   14.16    2.09
  -7   3 -13   14.20    1.38
  -7  -3  13   10.57    1.64
   7   3  13   13.03    1.59
   7   0 -14   -0.18    1.02
  -7   0 -14   -0.48    1.01
   7   0  14   -1.08    1.10
  -7   0  14   -0.54    1.50
  -7  -1 -14   -0.03    1.02
  -7   1  14   -0.43    1.21
   7   1 -14    0.66    1.11
   7  -1  14    0.82    1.07
  -7  -1  14    0.97    1.37
  -7   1 -14    0.84    1.06
   7  -1 -14    0.29    1.09
   7   1  14    0.04    1.22
   8   0   0   78.66    2.49
   8   0   0   76.33    2.46
  -8   0   0   77.59    2.54
   8   1   0  121.51    3.84
  -8  -1   0  120.66    3.75
   8   1   0  122.56    3.74
  -8  -1   0  126.27    3.89
   8  -1   0  123.14    3.79
   8  -1   0  126.74    3.87
  -8   1   0  126.86    3.86
  -8   2   0   74.72    2.43
   8   2   0   74.37    2.31
  -8   2   0   75.33    2.34
   8  -2   0   72.06    2.48
  -8  -2   0   73.31    2.49
   8   2   0   72.10    2.47
  -8   3   0  168.32    5.08
   8   3   0  171.59    5.22
  -8   3   0  171.62    5.13
   8   3   0  172.03    5.08
  -8  -3   0  159.57    5.24
   8  -3   0  168.88    5.22
   8  -4   0   18.71    1.10
  -8   4   0   17.14    0.93
   8   4   0   16.97    1.12
  -8  -4   0   17.01    0.85
  -8   4   0   15.88    0.88
  -8  -4   0   18.34    1.13
  -8  -5   0   15.41    1.23
  -8   5   0   16.38    0.95
   8  -5   0   15.19    1.18
  -8  -5   0   15.38    0.94
   8   5   0   15.60    1.09
  -8   5   0   16.35    0.95
  -8  -6   0    0.63    0.97
   8  -6   0    0.57    0.72
  -8   6   0    0.37    0.55
   8   6   0    0.72    0.80
   8   7   0    5.25    1.05
   8  -7   0    2.33    0.89
  -8  -7   0    3.90    1.07
  -8   7   0    4.32    0.78
  -8   8   0   16.76    1.24
   8   8   0   15.94    1.87
  -8   0  -1   71.00    2.38
   8   0   1   73.37    2.33
   8   0  -1   72.62    2.27
  -8   0   1   67.31    2.25
   8   0  -1   72.47    2.34
   8   0   1   70.99    2.30
  -8   0   1   74.74    2.40
  -8   1   1   37.25    1.37
   8  -1   1   36.43    1.28
   8  -1   1   38.24    1.43
  -8  -1  -1   35.35    1.38
   8   1  -1   35.94    1.40
   8   1  -1   33.12    1.19
   8  -1  -1   35.59    1.33
  -8   1  -1   36.70    1.39
   8   1   1   34.65    1.36
   8  -1  -1   38.28    1.38
  -8  -1   1   36.89    1.43
  -8  -1   1   33.93    1.19
  -8  -2  -1    5.06    0.55
   8   2  -1    4.98    0.61
   8   2  -1    4.93    0.36
  -8   2   1    5.19    0.50
  -8   2   1    5.07    0.45
   8  -2   1    5.62    0.65
  -8  -2  -1    4.88    0.53
   8   2   1    5.03    0.58
  -8   2  -1    4.81    0.42
  -8  -2   1    4.59    0.58
  -8  -2   1    5.56    0.40
  -8   2  -1    4.35    0.51
   8  -2  -1    5.04    0.53
   8   3  -1   22.06    1.22
  -8  -3  -1   22.98    1.12
  -8   3   1   22.87    0.97
   8  -3   1   21.48    1.22
  -8   3   1   23.59    1.02
  -8   3  -1   23.69    1.06
  -8  -3   1   22.53    0.85
   8  -3  -1   23.59    1.13
  -8   3  -1   22.43    0.92
  -8  -3   1   22.62    1.21
   8   3   1   22.67    1.01
   8   3   1   22.32    1.17
  -8   4   1    6.42    0.58
   8   4  -1    5.24    0.76
   8  -4   1    6.73    0.78
  -8  -4  -1    6.50    0.56
  -8  -4  -1    5.20    0.68
  -8   4   1    7.09    0.57
  -8   4  -1    6.19    0.60
  -8  -4   1    6.18    0.49
   8  -4  -1    6.15    0.70
   8   4   1    5.28    0.72
  -8   4  -1    6.93    0.56
  -8  -4   1    5.46    0.74
  -8  -5  -1    7.63    0.67
  -8   5   1    7.27    0.67
   8   5  -1    7.75    0.88
   8  -5   1    7.36    0.82
  -8  -5  -1    8.28    0.84
  -8   5  -1    8.46    0.69
   8  -5  -1    5.84    0.77
  -8  -5   1    7.71    0.90
   8   5   1    6.54    0.83
  -8   5  -1    7.47    0.65
  -8  -6  -1    0.67    0.77
   8   6  -1    0.91    0.79
  -8   6   1    0.93    0.58
  -8  -6  -1    0.49    0.61
   8  -6   1   -0.59    0.67
   8  -6  -1    0.16    0.69
  -8  -6   1    0.68    0.82
   8   6   1    0.34    0.75
  -8   6  -1    0.39    0.55
   8  -7   1    8.96    1.15
   8   7  -1    8.96    1.13
  -8   7   1   10.77    0.95
   8   7   1   11.27    1.20
   8  -7  -1    8.47    1.10
  -8   7  -1   11.42    0.95
  -8  -7   1   10.75    1.26
  -8   8   1   23.02    1.55
  -8   8  -1   21.69    1.53
   8   8   1   25.19    1.89
   8   0  -2  148.22    4.44
   8   0  -2  152.33    4.56
  -8   0   2  144.40    4.42
   8   0   2  156.03    4.56
  -8   0  -2  146.45    4.59
  -8   0   2  144.25    4.60
  -8   1   2   71.77    2.44
  -8   1   2   77.36    2.40
  -8  -1  -2   73.59    2.47
   8  -1   2   80.61    2.51
   8   1  -2   73.33    2.21
   8   1  -2   75.39    2.47
   8  -1   2   68.31    2.29
  -8  -1   2   70.30    2.50
  -8   1  -2   78.94    2.47
  -8  -1   2   69.09    2.21
   8   1   2   74.60    2.40
   8   1   2   75.12    2.39
  -8  -2  -2  187.38    5.61
   8  -2   2  182.94    5.67
  -8   2   2  184.55    5.57
   8   2  -2  171.04    5.60
  -8   2   2  188.07    5.52
   8   2   2  188.43    5.55
  -8  -2   2  180.28    5.67
  -8   2  -2  181.65    5.43
  -8   2  -2  181.86    5.56
   8   2   2  188.07    5.54
   8  -2  -2  180.96    5.53
   8  -3   2   28.66    1.44
  -8  -3  -2   30.75    1.27
  -8   3   2   27.15    1.19
   8   3  -2   32.13    1.39
  -8   3   2   28.78    1.15
  -8   3  -2   29.22    1.23
  -8   3  -2   30.03    1.08
  -8  -3   2   28.67    1.42
   8   3   2   27.98    1.30
   8  -3  -2   31.17    1.30
   8   3   2   27.25    1.22
   8   4  -2   34.56    1.58
  -8   4   2   34.89    1.34
   8  -4   2   33.50    1.64
  -8  -4  -2   33.64    1.48
  -8   4   2   32.33    1.31
   8  -4  -2   34.43    1.51
  -8   4  -2   35.52    1.40
  -8  -4   2   36.86    1.67
  -8   4  -2   34.12    1.27
   8   4   2   34.59    1.47
   8   4   2   33.17    1.53
  -8  -5  -2    1.94    0.55
  -8   5   2    2.41    0.56
   8  -5   2    1.55    0.74
   8   5  -2    2.50    0.77
  -8  -5  -2    1.59    0.64
  -8   5  -2    2.17    0.54
  -8  -5   2    3.13    0.85
   8  -5  -2    1.89    0.66
   8   5   2    1.64    0.70
  -8   5  -2    2.00    0.50
  -8   6   2    3.27    0.65
  -8  -6  -2    3.29    0.67
   8   6  -2    2.04    0.86
   8  -6   2    2.92    0.86
  -8  -6  -2    3.82    0.83
  -8  -6   2    2.62    0.89
   8  -6  -2    3.62    0.80
   8   6   2    3.14    0.84
  -8   6  -2    3.76    0.67
  -8   7   2    6.90    0.88
  -8  -7  -2    7.21    0.95
   8  -7   2    7.23    1.09
   8   7  -2    8.60    1.15
   8  -7  -2    6.62    1.04
  -8   7  -2    8.11    0.86
   8   7   2    8.41    1.12
   8   8  -2   11.10    1.56
  -8   8   2    9.85    1.07
   8  -8   2    7.03    1.59
  -8   8  -2   10.85    1.10
   8  -8  -2   13.79    2.65
   8   8   2    9.24    1.43
  -8   0  -3   50.05    1.73
   8   0  -3   50.65    1.72
   8   0  -3   48.08    1.56
   8   0   3   45.69    1.58
   8   0   3   44.18    1.53
  -8   0   3   49.25    1.78
  -8   0   3   46.95    1.53
   8   0   3   47.22    1.73
  -8   1   3   57.69    2.04
  -8  -1  -3   55.73    1.89
  -8   1   3   58.67    1.96
   8   1  -3   59.12    2.04
   8  -1   3   60.08    1.85
   8  -1   3   55.14    1.85
  -8   1   3   55.80    1.91
   8  -1   3   61.49    2.09
  -8  -1  -3   58.06    2.04
   8   1   3   52.62    1.97
   8   1   3   57.38    1.92
  -8   1  -3   57.98    2.01
   8  -1  -3   60.66    1.90
  -8  -1   3   61.32    2.12
   8   2  -3   90.45    3.15
  -8   2   3  100.30    3.05
  -8   2   3   95.34    3.09
  -8  -2  -3   91.07    3.11
   8  -2   3   96.51    3.21
  -8   2  -3   96.27    3.09
   8   2   3   96.04    3.09
  -8   2  -3   96.72    2.92
  -8  -2   3   98.00    3.24
   8   2   3   99.71    3.05
   8  -2  -3   95.19    3.04
   8  -3   3   18.57    1.27
  -8   3   3   18.40    0.94
  -8  -3  -3   17.82    0.98
   8   3  -3   16.70    1.09
  -8   3   3   16.69    0.87
  -8  -3   3   18.26    1.19
  -8   3  -3   18.73    0.77
  -8   3  -3   18.50    0.97
   8   3   3   18.38    1.00
   8  -3  -3   17.72    0.98
   8   3   3   16.45    1.00
   8  -4   3   16.37    1.32
  -8  -4  -3   18.64    1.03
  -8   4   3   18.70    0.95
  -8   4   3   17.84    0.92
  -8  -4   3   16.49    1.28
   8  -4  -3   19.68    1.12
  -8   4  -3   17.56    1.02
  -8   4  -3   18.31    0.86
   8   4   3   19.06    1.13
   8   4   3   18.90    1.09
   8  -5   3    6.38    0.92
  -8   5   3    7.17    0.70
   8   5  -3    7.61    0.95
  -8  -5  -3    7.90    0.74
  -8  -5  -3    7.04    0.80
   8   5   3    7.12    1.13
  -8   5  -3    7.56    0.64
   8  -5  -3    8.29    0.85
  -8  -5   3    6.72    0.93
  -8   5  -3    8.11    0.73
  -8   6   3    0.66    0.61
   8  -6   3    1.23    0.90
   8   6  -3    0.68    0.83
  -8  -6  -3    0.77    0.74
  -8   6  -3    0.60    0.57
  -8  -6   3    0.49    0.92
   8  -6  -3    0.34    0.71
   8   6   3    1.22    0.80
   8   7  -3    1.85    1.00
  -8  -7  -3    1.03    0.81
   8  -7   3    1.91    1.04
  -8   7   3    2.00    0.75
  -8  -7   3    2.46    1.26
   8  -7  -3    1.61    0.92
   8   7   3    1.87    0.95
  -8   7  -3    1.49    0.80
   8  -8   3    1.89    1.28
  -8   8   3    2.70    1.66
   8   8  -3    3.02    1.19
   8  -8  -3    1.79    1.24
   8   8   3    2.36    1.44
   8   0   4  122.26    3.88
  -8   0   4  123.78    3.92
   8   0  -4  119.52    3.64
   8   0  -4  124.55    3.85
   8   0   4  122.25    3.66
  -8   0  -4  120.86    3.85
  -8   1   4   73.76    2.49
   8  -1   4   70.09    2.24
   8   1  -4   74.95    2.49
  -8   1   4   74.47    2.42
  -8  -1  -4   72.41    2.46
   8  -1   4   74.26    2.52
   8  -1  -4   71.16    2.30
  -8   1  -4   74.67    2.45
   8   1   4   69.01    2.44
  -8  -1   4   71.04    2.55
   8   1   4   75.02    2.31
  -8  -2  -4   51.67    1.86
  -8   2   4   48.88    1.81
  -8   2   4   47.25    1.74
   8  -2   4   48.09    1.59
   8  -2   4   50.82    1.98
   8   2  -4   51.14    1.92
   8  -2  -4   51.05    1.74
   8   2   4   49.12    1.72
   8   2   4   49.75    1.83
  -8  -2   4   49.82    1.97
  -8   2  -4   49.51    1.81
  -8   3   4   47.21    1.68
   8   3  -4   43.70    1.88
  -8  -3  -4   43.01    1.74
   8  -3   4   47.29    1.96
  -8   3   4   49.28    1.71
   8   3   4   50.21    1.82
   8   3   4   44.77    1.70
  -8   3  -4   45.37    1.51
  -8   3  -4   45.81    1.73
  -8  -3   4   45.09    1.95
   8  -3  -4   47.60    1.74
  -8   4   4   10.25    0.72
  -8  -4  -4   10.63    0.80
  -8   4   4   10.64    0.79
   8   4  -4    8.98    0.90
   8  -4   4   10.29    1.03
  -8   4  -4    8.72    0.57
   8   4   4    8.87    0.83
   8   4   4    9.96    0.82
  -8   4  -4    8.97    0.74
   8  -4  -4   10.47    0.83
   8   5  -4    2.77    0.78
   8  -5   4    3.44    0.91
  -8  -5  -4    3.91    0.68
  -8  -5  -4    3.57    0.64
  -8   5   4    3.49    0.64
   8  -5  -4    3.08    0.70
  -8  -5   4    3.10    0.89
  -8   5  -4    3.54    0.64
  -8   5  -4    3.01    0.68
  -8  -6  -4    9.82    1.01
  -8  -6  -4   11.43    1.01
  -8   6   4   10.92    0.95
   8   6  -4   11.25    1.14
   8  -6   4   11.00    1.25
  -8   6  -4   13.28    0.98
   8   6   4   11.72    1.09
   8  -6  -4   11.65    1.09
  -8  -6   4   12.80    1.42
   8  -7   4    1.96    1.15
   8   7  -4    3.22    1.05
  -8  -7  -4    3.37    0.89
  -8   7   4    2.71    0.79
   8   7   4    2.33    0.98
  -8  -7   4    1.72    1.25
   8  -7  -4    2.12    0.96
  -8  -8  -4    1.75    1.06
   8   8  -4    1.42    1.20
  -8   8   4    1.39    0.89
   8  -8   4    2.15    1.38
   8  -8  -4    0.66    1.10
   8   0  -5   77.24    2.44
   8   0   5   82.57    2.75
  -8   0   5   84.00    2.80
   8   0  -5   78.39    2.70
  -8   0  -5   77.00    2.67
   8   0   5   83.84    2.43
  -8   1   5  144.19    4.53
   8   1  -5  147.48    4.59
   8  -1   5  143.58    4.62
  -8   1   5  148.48    4.61
  -8  -1  -5  147.46    4.57
  -8   1  -5  145.87    4.56
   8  -1  -5  148.99    4.45
   8   1   5  147.70    4.36
   8   1   5  141.15    4.58
  -8  -1   5  144.71    4.68
  -8   2   5   46.76    1.78
  -8   2   5   43.72    1.69
   8  -2   5   44.42    1.89
   8   2  -5   47.25    1.85
  -8  -2  -5   47.85    1.78
  -8   2  -5   48.39    1.76
   8   2   5   45.27    1.62
  -8  -2   5   44.74    1.92
   8  -2  -5   49.30    1.67
   8   2   5   47.10    1.81
   8  -3   5   23.76    1.55
  -8  -3  -5   24.25    1.25
  -8   3   5   24.04    1.25
  -8   3   5   25.38    1.20
  -8  -3   5   23.76    1.81
  -8   3  -5   24.20    1.22
   8   3   5   24.18    1.30
   8   3   5   24.36    1.16
   8  -3  -5   25.39    1.19
   8   4  -5    1.84    0.72
  -8   4   5    2.67    0.54
  -8  -4  -5    2.88    0.58
   8  -4   5    1.98    0.75
  -8   4  -5    2.48    0.58
   8   4   5    1.91    0.64
   8  -4  -5    2.47    0.60
   8   4   5    3.06    0.65
  -8  -4   5    1.95    0.79
  -8   5   5    1.25    0.58
  -8  -5  -5    1.14    0.58
   8   5  -5    1.28    0.77
   8  -5   5    1.44    0.87
  -8  -5   5    1.56    0.99
   8  -5  -5    1.43    0.67
   8   5   5    1.63    1.27
   8   5   5    1.73    0.75
  -8   6   5    0.71    0.65
   8   6  -5    0.70    0.87
   8  -6   5    0.56    1.02
  -8  -6  -5    1.05    0.73
  -8  -6   5    1.34    1.13
   8  -6  -5    0.26    0.76
  -8   6  -5    0.58    0.72
   8   6   5    0.64    0.81
   8   7  -5    3.45    1.08
  -8  -7  -5    3.18    0.90
   8  -7   5    2.21    1.28
  -8   7   5    2.99    0.87
   8  -7  -5    2.25    1.00
  -8  -7   5    2.69    1.30
   8   7   5    3.47    1.06
   8   8  -5    3.37    1.28
  -8  -8  -5    2.38    1.11
  -8   8   5    1.85    0.96
   8  -8   5    1.75    1.46
   8  -8  -5    0.91    1.14
   8   8   5    2.23    1.25
  -8  -8   5    0.84    1.70
  -8   0  -6   47.48    1.80
  -8   0   6   48.44    1.92
   8   0   6   45.68    1.84
   8   0  -6   48.31    1.82
  -8   1   6    9.49    0.81
   8  -1   6    7.05    0.76
  -8  -1  -6    8.98    0.71
   8   1  -6    8.42    0.75
  -8   1  -6    8.72    0.71
   8  -1  -6    9.27    0.70
   8   1   6    8.19    0.79
   8   1   6    9.93    0.60
   8  -1  -6    7.74    0.71
  -8  -1   6    9.35    0.89
   8   2  -6   11.45    0.92
  -8   2   6   10.56    0.83
  -8  -2  -6   11.00    0.82
  -8   2   6   10.81    0.86
   8  -2   6   11.17    0.95
   8  -2  -6   10.37    0.80
   8   2   6   11.38    0.90
  -8   2  -6    9.80    0.78
   8   2   6    9.55    0.70
  -8  -2   6   10.42    0.97
  -8  -3  -6    1.46    0.53
   8  -3   6    0.31    0.64
   8   3  -6    0.99    0.67
  -8   3   6    0.54    0.44
  -8   3   6    0.49    0.56
   8  -3  -6    1.19    0.52
   8   3   6    1.16    0.61
   8   3   6    1.33    0.51
  -8  -3   6    0.45    0.73
  -8  -4  -6    5.16    0.70
   8  -4   6    3.57    0.83
  -8   4   6    3.90    0.61
   8   4  -6    4.19    0.77
   8   4   6    5.34    0.70
  -8  -4   6    5.21    1.06
   8  -4  -6    4.31    0.70
   8   4   6    4.04    0.79
  -8   4  -6    4.12    0.68
   8   5  -6    0.06    0.74
   8  -5   6    0.37    0.86
  -8  -5  -6    1.09    0.61
  -8   5   6    0.33    0.59
   8   5   6    0.99    0.79
  -8  -5   6    1.16    1.00
  -8   5  -6   -0.22    0.62
   8   5   6    1.20    0.84
   8  -5  -6    0.59    0.68
  -8  -6  -6   13.00    1.13
  -8   6   6   11.36    1.01
   8  -6   6   11.27    1.36
   8   6  -6   12.45    1.24
  -8   6  -6   12.09    1.04
   8  -6  -6   10.55    1.11
   8   6   6   13.22    1.14
  -8  -6   6   12.31    1.46
   8   7  -6    2.36    1.10
   8  -7   6    1.07    1.39
  -8   7   6    4.80    0.98
  -8  -7  -6    2.54    0.95
   8  -7  -6    2.79    1.02
   8   7   6    3.27    1.09
  -8  -7   6    1.85    1.34
   8   0   7  105.86    3.57
  -8  -1  -7   46.92    1.95
   8  -1  -7   48.16    1.62
   8   1   7   45.74    1.89
   8  -1  -7   43.71    1.96
  -8   1  -7   42.72    1.93
   8  -2   7   59.16    2.35
  -8   2   7   58.39    2.18
   8   2  -7   60.01    2.35
  -8   2   7   61.56    2.34
  -8  -2  -7   62.42    2.34
   8  -2  -7   62.50    2.13
  -8  -2   7   65.09    2.56
  -8   2  -7   60.35    2.25
  -8   3   7   30.58    1.51
   8   3  -7   31.91    1.60
  -8   3   7   28.98    1.36
  -8  -3  -7   34.27    2.10
   8  -3   7   30.16    1.63
  -8   3  -7   31.87    1.48
   8   3   7   33.06    1.36
  -8  -3   7   32.77    1.83
   8   3   7   30.03    1.62
   8  -3  -7   31.23    1.42
  -8   4   7    7.90    0.75
   8  -4   7    9.70    1.07
   8   4  -7    8.20    0.99
   8   4   7   11.50    0.87
  -8  -4   7    9.93    1.19
  -8   4  -7    8.61    0.86
   8  -4  -7   10.61    1.11
   8   4   7    8.84    1.01
   8  -5   7    5.74    1.10
  -8   5   7    6.29    0.82
  -8  -5  -7    5.54    0.81
   8   5  -7    7.87    1.03
   8  -5  -7    5.74    0.89
  -8   5  -7    4.78    0.82
   8   5   7    9.46    1.13
   8   5   7    6.89    0.91
  -8  -5   7    6.30    1.20
   8  -6   7    7.33    1.27
  -8   6   7   10.00    0.99
  -8  -6  -7    8.61    1.06
   8   6  -7    8.54    1.21
  -8  -6   7    9.13    1.38
  -8   6  -7    8.83    1.02
   8   6   7    8.20    1.03
   8  -6  -7    8.55    1.11
   8  -7   7    3.90    1.25
  -8  -7  -7    4.06    1.05
  -8   7   7    2.12    0.91
   8   7  -7    1.99    1.20
  -8  -7   7    2.08    1.42
   8   7   7    2.84    1.06
   8  -7  -7    3.18    1.14
   8   0   8    3.81    0.72
   8   0  -8    5.64    0.76
  -8   0  -8    3.95    0.65
   8   1  -8    3.68    0.69
  -8   1   8    3.00    0.78
   8  -1   8    2.59    0.70
  -8  -1  -8    3.04    0.63
  -8  -1   8    3.99    0.91
   8  -1  -8    2.57    0.65
  -8   1  -8    4.37    0.68
   8   1   8    3.00    0.69
  -8   2   8   13.78    1.06
   8   2  -8   10.40    0.97
  -8   2   8   12.24    0.88
   8  -2   8   10.80    0.99
  -8  -2  -8    9.43    0.83
   8   2   8   10.45    0.98
   8  -2  -8   12.01    0.95
  -8   2  -8   11.30    0.92
  -8  -2   8   12.31    1.18
  -8  -3  -8    5.34    0.76
   8   3  -8    8.50    0.98
   8  -3   8    7.54    0.97
  -8   3   8    6.81    0.87
  -8   3   8    6.48    0.73
   8   3   8    6.71    0.94
  -8  -3   8    7.18    1.09
  -8   3  -8    7.46    0.83
   8  -3  -8    7.46    0.79
  -8   4   8    0.70    0.61
   8  -4   8    1.08    0.80
   8   4  -8    0.65    0.80
  -8  -4  -8    0.20    0.63
  -8   4  -8    0.05    0.64
   8  -4  -8    0.56    0.68
   8   4   8    0.79    0.81
  -8  -4   8   -0.06    0.91
  -8  -5  -8    3.89    0.82
   8   5  -8    4.71    1.01
   8  -5   8    4.16    1.04
  -8   5   8    3.36    0.75
   8  -5  -8    3.26    0.86
  -8   5  -8    2.67    0.80
   8   5   8    3.01    1.02
  -8  -5   8    3.55    1.16
  -8  -6  -8    7.39    1.10
   8  -6   8    5.33    1.22
  -8   6   8    7.43    1.01
   8   6  -8    7.67    1.19
  -8  -6   8    4.61    1.36
  -8   6  -8    7.09    1.04
   8  -6  -8    6.75    1.12
  -8  -7  -8    7.37    1.22
   8  -7   8    6.97    1.47
   8   7  -8    7.98    1.43
  -8   7   8    8.96    1.14
  -8  -7   8    7.47    1.72
   8  -7  -8    7.72    1.32
   8   0   9   46.36    2.09
   8   0  -9   51.20    2.08
  -8   0  -9   49.66    2.01
  -8   0   9   49.74    2.16
   8  -1   9   65.48    2.60
  -8   1   9   69.63    2.72
   8   1  -9   67.78    2.54
  -8  -1  -9   68.77    2.49
   8   1   9   64.12    2.54
   8  -1  -9   67.09    2.53
  -8  -1   9   66.37    2.69
  -8   1  -9   66.26    2.50
  -8   2   9   24.92    1.36
   8   2  -9   24.39    1.55
  -8   2   9   25.25    1.52
  -8  -2  -9   23.85    1.38
   8  -2   9   23.11    1.56
  -8  -2   9   25.94    1.68
  -8   2  -9   26.32    1.44
   8   2   9   24.79    1.56
  -8   3   9   50.03    2.02
   8   3  -9   48.42    2.24
   8  -3   9   51.97    2.29
  -8  -3  -9   49.04    2.04
   8   3   9   52.27    2.32
  -8  -3   9   49.73    2.41
   8  -3  -9   52.51    2.05
  -8   3  -9   47.58    2.11
  -8  -4  -9   10.80    1.00
   8   4  -9   10.26    1.11
   8  -4   9   10.96    1.19
  -8   4   9   11.06    0.96
   8   4   9   10.70    1.23
  -8   4  -9   11.90    1.05
  -8  -4   9   11.04    1.36
   8  -4  -9   12.82    1.09
   8   5  -9   11.95    1.26
  -8   5   9    8.36    0.90
   8  -5   9    9.53    1.25
  -8  -5   9    9.21    1.39
  -8   5  -9   11.41    1.12
   8  -5  -9   11.56    1.15
   8   5   9   10.75    1.34
  -8  -6  -9   22.06    2.04
   8   6  -9   16.08    1.82
  -8   6   9   15.53    1.25
   8  -6   9   15.41    1.58
   8  -6  -9   19.94    1.52
  -8   6  -9   18.63    1.42
  -8   0  10   16.74    1.35
   8   0 -10   18.37    1.35
   8   0  10   15.31    1.24
  -8   0 -10   16.75    1.29
  -8   1  10    9.16    1.12
  -8  -1 -10   10.16    0.97
   8   1 -10   11.20    1.05
   8  -1  10    8.42    1.02
   8  -1 -10    9.06    0.99
   8   1  10   12.08    1.11
  -8   1 -10   10.34    0.98
  -8  -1  10   10.07    1.21
   8   2 -10   27.63    1.69
  -8   2  10   26.51    1.64
  -8  -2 -10   27.44    1.53
   8  -2  10   25.47    1.68
  -8   2  10   27.39    1.50
  -8  -2  10   24.95    1.77
  -8   2 -10   27.48    1.56
   8   2  10   25.55    1.67
  -8  -3 -10   -0.17    0.65
   8   3 -10    1.08    0.90
  -8   3  10    0.44    0.68
   8  -3  10   -0.05    0.84
   8   3  10    0.25    0.94
  -8   3 -10   -0.45    0.74
  -8  -3  10    0.38    0.99
  -8  -4 -10    0.23    0.78
   8  -4  10    0.78    0.96
  -8   4  10   -0.06    0.70
   8   4 -10    0.10    0.90
  -8   4 -10    0.59    0.83
   8  -4 -10   -0.31    0.83
   8   4  10    0.20    1.03
  -8  -4  10    0.74    1.11
   8  -5  10    1.21    1.69
   8   5 -10    2.12    1.07
  -8   5  10    1.13    1.23
   8  -5 -10    1.08    0.99
   8   5  10    1.70    1.23
  -8  -5  10    0.82    1.47
  -8   5 -10    2.41    0.96
   8   0 -11   27.07    1.69
   8   0  11   24.95    1.70
  -8   0 -11   25.72    1.64
  -8   0  11   24.63    1.78
   8  -1  11   30.71    1.91
   8   1 -11   30.94    1.84
  -8   1  11   33.25    1.99
  -8  -1 -11   34.00    1.78
  -8   1 -11   36.77    1.82
   8  -1 -11   35.13    1.78
  -8  -1  11   32.26    2.03
   8   1  11   33.13    1.89
   8  -2  11   16.21    1.35
   8   2 -11   16.80    1.36
  -8   2  11   17.22    1.43
  -8  -2 -11   18.15    1.29
   8  -2 -11   20.94    1.49
   8   2  11   18.51    1.49
  -8   2 -11   16.95    1.28
  -8  -2  11   18.76    1.66
  -8   3  11   32.01    1.66
   8   3 -11   30.41    1.97
  -8  -3 -11   31.38    1.72
   8  -3  11   29.28    1.99
  -8  -3  11   31.35    2.24
   8   3  11   31.75    2.05
  -8   3 -11   32.10    1.81
  -8  -4 -11    1.78    0.90
   8  -4  11    2.81    1.16
  -8   4  11    2.13    0.84
   8   4 -11    1.72    1.02
  -8   4 -11    2.05    0.96
   8   4  11    3.59    1.30
   8  -5  11    8.06    1.39
  -8   5  11    7.46    1.05
   8   5  11    8.04    1.50
  -8  -5  11    5.64    1.60
   8  -5 -11    8.84    1.28
  -8   5 -11    9.26    1.22
  -8   0 -12   23.32    1.67
   8   0  12   22.12    1.70
  -8   0  12   24.43    1.76
   8   0 -12   28.27    1.78
   8   1 -12   11.19    1.24
  -8  -1 -12   14.68    1.26
  -8   1  12   13.81    1.46
   8  -1  12   13.57    1.36
  -8   1 -12   13.82    1.25
   8  -1 -12   13.67    1.29
   8   1  12   11.52    1.27
  -8  -1  12   12.37    1.47
  -8  -2 -12   13.73    1.25
   8  -2  12   12.08    1.32
   8   2 -12    8.97    1.20
  -8   2  12   15.80    1.51
  -8  -2  12   14.41    1.58
  -8   2 -12   13.26    1.24
   8   2  12   12.51    1.40
   8  -2 -12   11.87    1.22
  -8   3  12   19.18    1.40
  -8  -3 -12   20.74    1.62
   8   3 -12   19.15    1.55
  -8   3 -12   21.01    1.80
  -8  -3  12   32.55    3.12
   8   4 -12    0.61    1.70
   8  -4  12    0.86    1.13
  -8   4  12   -0.32    0.90
   8   4  12    0.93    1.36
  -8  -4  12    0.75    1.39
  -8   4 -12    0.48    1.02
   8   0  13    7.97    1.27
  -8   0  13    7.94    1.44
   8   0 -13    6.89    1.19
   8  -1  13    3.60    1.21
   8   1 -13    2.60    1.07
  -8   1  13    2.78    1.26
  -8  -1 -13    3.50    1.11
   8  -1 -13    3.61    1.14
  -8   1 -13    2.78    1.07
  -8  -1  13    3.87    1.37
   8   1  13    2.43    1.16
   8   2 -13    1.90    1.14
   8  -2  13    3.35    1.19
  -8  -2 -13    2.02    1.02
   8   2  13    2.32    1.28
  -8   2 -13    1.80    1.04
  -8  -2  13    2.95    1.42
  -9   0   0    0.09    0.36
   9   0   0    0.17    0.36
   9   0   0   -0.50    0.39
   9   1   0   64.15    2.23
   9  -1   0   65.41    2.24
   9  -1   0   65.17    2.16
  -9   1   0   68.31    2.24
  -9  -1   0   64.50    2.19
  -9  -1   0   64.29    2.25
   9   1   0   63.37    2.09
  -9   2   0    4.58    0.55
   9   2   0    5.03    0.44
  -9   2   0    4.68    0.48
  -9  -2   0    4.81    0.59
   9   2   0    5.25    0.65
   9  -2   0    4.25    0.66
  -9  -3   0   45.96    1.89
   9   3   0   46.07    1.88
   9   3   0   48.32    1.66
  -9   3   0   48.56    1.67
  -9   3   0   49.50    1.76
   9  -3   0   45.91    1.88
   9   4   0   13.32    1.00
  -9   4   0   11.30    0.88
  -9   4   0   11.20    0.79
   9  -4   0   11.31    0.91
  -9  -4   0   11.75    0.96
  -9  -4   0   11.64    0.77
  -9   5   0   31.74    1.41
  -9   5   0   36.26    1.46
   9   5   0   33.39    1.69
  -9  -5   0   33.02    1.88
   9  -5   0   33.70    1.69
   9   6   0   12.73    1.19
  -9  -6   0   12.51    1.20
   9  -6   0   11.67    1.16
  -9   6   0   15.16    1.00
  -9  -7   0   -0.01    1.07
  -9   7   0   -0.09    0.70
   9   7   0    0.82    0.97
   9  -7   0   -0.50    0.91
   9  -8   0    4.04    1.20
  -9   8   0    3.17    0.94
   9   8   0    2.48    1.27
   9   0  -1    0.08    0.42
  -9   0  -1    0.20    0.39
   9   0  -1    0.08    0.35
   9   0   1    0.31    0.40
   9   0   1    0.46    0.38
  -9   0   1   -0.11    0.36
  -9   0   1    0.44    0.40
  -9   1   1   29.60    1.21
   9  -1   1   27.58    1.12
  -9  -1  -1   28.79    1.24
   9   1  -1   27.21    1.01
   9  -1   1   26.35    1.26
   9   1  -1   29.37    1.27
   9  -1  -1   27.30    1.17
  -9   1  -1   29.21    1.23
   9   1   1   27.10    1.20
  -9  -1   1   26.70    1.27
   9   1   1   26.76    1.12
   9  -1  -1   28.33    1.24
   9   2  -1   11.98    0.88
  -9   2   1   12.88    0.82
   9   2  -1   10.76    0.59
  -9   2   1   11.05    0.69
   9  -2   1   12.70    0.92
  -9  -2  -1   12.06    0.84
   9  -2  -1   12.24    0.91
   9   2   1   13.19    0.95
  -9  -2   1   11.71    0.93
   9   2   1   11.28    0.73
  -9   2  -1   10.91    0.67
  -9   2  -1   12.13    0.86
   9  -3   1   39.33    1.75
  -9   3   1   42.35    1.53
  -9  -3  -1   38.46    1.61
   9   3  -1   37.67    1.67
  -9   3   1   39.68    1.45
   9   3   1   38.53    1.48
  -9   3  -1   40.33    1.41
  -9  -3   1   37.53    1.33
   9  -3  -1   41.82    1.62
  -9   3  -1   41.42    1.57
  -9  -3   1   36.88    1.69
   9   3   1   37.55    1.64
  -9   4   1   43.68    1.59
  -9   4   1   44.78    1.61
  -9  -4  -1   40.51    1.81
   9  -4   1   41.91    1.88
  -9  -4  -1   40.78    1.57
   9   4   1   42.90    1.81
  -9   4  -1   40.04    1.66
  -9  -4   1   43.78    1.91
  -9   4  -1   41.69    1.55
   9  -4  -1   43.70    1.80
  -9  -5  -1   23.71    1.24
   9  -5   1   26.94    1.59
   9   5  -1   24.77    1.50
  -9   5   1   24.85    1.19
   9   5   1   27.11    1.54
  -9   5  -1   25.67    1.29
  -9  -5   1   24.43    1.56
   9  -5  -1   25.06    1.47
  -9   5  -1   27.46    1.20
  -9   6   1   42.83    1.77
   9  -6   1   43.69    2.09
   9   6  -1   43.44    2.08
  -9  -6  -1   46.38    2.14
  -9  -6   1   45.21    2.21
  -9   6  -1   43.67    1.78
   9  -6  -1   43.75    2.06
   9   6   1   43.76    2.10
   9   7  -1   14.69    1.41
  -9   7   1   14.33    1.09
   9  -7   1   16.20    1.41
  -9   7  -1   15.33    1.10
   9  -7  -1   14.21    1.35
   9   7   1   15.88    1.39
  -9  -7   1   14.55    1.45
   9  -8   1   14.98    1.59
   9   8  -1   16.44    1.59
  -9   8   1   14.49    1.24
   9   8   1   14.75    1.60
  -9   8  -1   17.16    1.29
   9  -8  -1   18.00    1.63
   9   0  -2    0.16    0.42
   9   0  -2    0.10    0.34
  -9   0  -2   -0.01    0.39
   9   0   2   -0.17    0.41
   9   0   2   -0.34    0.39
  -9   0   2    0.17    0.41
   9   1  -2   11.01    0.79
   9  -1   2   10.17    0.67
   9  -1   2   10.73    0.78
  -9  -1  -2    9.17    0.70
   9   1  -2    9.57    0.48
  -9   1   2   10.09    0.81
   9  -1  -2    8.29    0.67
   9   1   2   10.14    0.70
   9   1   2   10.32    0.74
  -9   1  -2    9.19    0.71
   9  -1  -2    9.65    0.78
  -9  -1   2    9.16    0.77
  -9   2   2    4.18    0.55
   9  -2   2    4.12    0.71
  -9   2   2    5.03    0.52
  -9  -2  -2    4.14    0.57
   9   2  -2    6.22    0.72
  -9  -2   2    4.43    0.68
   9   2   2    5.28    0.64
   9   2   2    4.83    0.53
  -9   2  -2    5.08    0.59
  -9   2  -2    4.82    0.44
   9  -2  -2    4.16    0.54
   9   3  -2    0.83    0.61
  -9   3   2    2.12    0.50
  -9  -3  -2    2.06    0.51
  -9   3   2    2.08    0.44
   9  -3   2    2.55    0.76
   9   3   2    2.58    0.51
   9  -3  -2    1.90    0.54
  -9   3  -2    1.59    0.38
   9   3   2    2.17    0.62
  -9   3  -2    1.30    0.49
  -9  -3   2    1.30    0.63
   9   4  -2   28.94    1.48
  -9   4   2   27.51    1.21
   9  -4   2   24.75    1.79
  -9  -4  -2   25.74    1.37
  -9   4   2   27.68    1.22
   9   4   2   27.44    1.38
   9  -4  -2   27.54    1.38
  -9   4  -2   26.41    1.13
   9   4   2   27.95    1.33
  -9   4  -2   25.25    1.27
  -9   5   2   12.45    0.85
   9   5  -2    9.60    1.02
  -9  -5  -2   12.66    0.88
   9  -5   2   12.57    1.18
  -9  -5   2   11.22    1.11
  -9   5  -2   11.16    0.85
   9   5   2   10.87    1.01
   9  -5  -2   11.51    1.00
  -9   5  -2   11.67    0.86
  -9  -6  -2   13.77    1.19
  -9  -6  -2   13.00    1.16
   9   6  -2   12.68    1.20
  -9   6   2   12.31    0.95
   9  -6   2   10.82    1.22
  -9   6  -2   14.37    0.96
   9  -6  -2   11.40    1.10
  -9  -6   2   13.05    1.29
   9   6   2   13.59    1.15
   9  -7   2   17.29    1.57
  -9   7   2   18.67    1.32
   9   7  -2   20.58    1.58
  -9  -7   2   20.50    1.66
  -9   7  -2   17.26    1.29
   9  -7  -2   19.53    1.48
   9   7   2   21.45    1.54
   9  -8   2   14.35    1.65
   9   8  -2   16.80    1.57
   9  -8  -2   13.03    1.50
   9   8   2   14.84    1.55
   9   0  -3    0.06    0.43
   9   0   3    0.11    0.40
  -9   0  -3    0.40    0.43
   9   0  -3    0.12    0.34
  -9   0   3    0.15    0.45
   9   0   3    0.44    0.44
  -9  -1  -3   34.96    1.47
  -9   1   3   35.73    1.49
   9   1  -3   36.10    1.49
   9  -1   3   36.81    1.52
   9  -1  -3   34.51    1.43
  -9   1  -3   35.39    1.44
  -9  -1   3   33.93    1.54
   9   1   3   33.96    1.36
   9   1   3   36.29    1.42
   9  -1  -3   36.59    1.36
  -9   2   3   47.77    1.82
   9  -2   3   51.90    1.98
  -9  -2  -3   48.26    1.85
   9   2  -3   46.50    1.88
   9  -2   3   48.35    1.65
  -9   2   3   48.83    1.75
  -9   2  -3   49.58    1.83
  -9  -2   3   48.92    1.99
   9   2   3   46.06    1.79
   9   2   3   50.20    1.77
   9  -2  -3   51.20    1.78
  -9  -3  -3    9.15    0.79
   9  -3   3   10.76    0.97
   9   3  -3    9.76    0.88
  -9   3   3   10.58    0.76
  -9   3   3   11.07    0.79
   9   3   3   10.20    0.84
  -9   3  -3    9.46    0.74
  -9  -3   3   10.10    0.94
  -9   3  -3    9.41    0.64
   9   3   3   10.38    0.78
   9  -3  -3    9.24    0.78
  -9  -4  -3   32.53    1.45
   9  -4   3   31.81    1.72
  -9   4   3   31.73    1.35
   9   4  -3   29.84    1.59
  -9   4   3   32.23    1.36
   9   4   3   32.11    1.51
  -9  -4   3   31.23    1.70
  -9   4  -3   30.82    1.41
   9  -4  -3   32.41    1.50
  -9   4  -3   31.16    1.23
   9   4   3   30.33    1.47
   9   5  -3   42.45    1.96
  -9  -5  -3   41.00    1.72
  -9   5   3   40.20    1.68
   9  -5   3   40.46    2.11
  -9  -5   3   44.70    2.13
  -9   5  -3   40.40    1.73
   9   5   3   39.32    1.82
   9  -5  -3   43.79    1.90
  -9   5  -3   41.66    1.58
  -9   6   3   19.81    1.21
  -9  -6  -3   17.62    1.29
   9  -6   3   18.31    1.49
   9   6  -3   19.89    1.44
  -9  -6  -3   15.87    1.27
   9  -6  -3   18.01    1.34
  -9  -6   3   17.37    1.45
   9   6   3   18.59    1.33
   9   7  -3   12.25    1.38
  -9   7   3   13.46    1.10
   9  -7   3    9.55    1.40
   9  -7  -3   11.31    1.25
   9   7   3   13.43    1.35
   9  -8   3   14.82    1.70
  -9   8   3   15.85    1.34
   9   8  -3   18.64    1.69
   9  -8  -3   14.22    1.51
   9   8   3   15.76    1.55
   9   0  -4    0.39    0.49
  -9   0  -4    0.33    0.43
  -9   0   4   -0.11    0.47
   9   0   4   -0.03    0.46
   9   0   4   -0.09    0.39
   9   0  -4    0.42    0.35
  -9  -1  -4   12.06    0.90
   9  -1   4   12.80    0.99
  -9   1   4   14.04    0.96
   9  -1   4   10.95    0.71
   9   1  -4   13.35    0.94
   9   1   4   12.79    0.82
   9   1   4   11.99    0.89
  -9  -1   4   11.52    0.94
  -9   1  -4   14.66    0.92
   9  -1  -4   10.94    0.81
   9  -2   4    2.83    0.68
  -9  -2  -4    3.01    0.58
  -9   2   4    3.55    0.57
   9  -2   4    3.75    0.41
  -9   2   4    3.67    0.51
   9   2  -4    2.28    0.64
  -9   2  -4    2.51    0.53
   9   2   4    2.71    0.56
   9  -2  -4    3.22    0.53
  -9  -2   4    3.29    0.71
   9   2   4    3.91    0.58
  -9  -3  -4   45.35    1.83
  -9   3   4   48.16    2.02
   9   3  -4   46.14    1.94
  -9   3   4   47.80    1.79
   9  -3   4   49.65    2.21
  -9   3  -4   46.19    1.80
  -9  -3   4   50.31    2.15
   9  -3  -4   46.85    1.80
   9   3   4   43.78    1.74
   9   3   4   45.35    1.85
  -9   4   4   13.24    0.92
   9  -4   4   12.84    1.16
  -9  -4  -4   14.46    1.02
  -9   4   4   13.85    1.01
   9   4  -4   16.46    1.18
   9   4   4   14.01    0.99
   9  -4  -4   13.56    1.07
  -9   4  -4   15.26    1.06
  -9  -4   4   13.52    1.17
   9   4   4   15.15    1.14
   9   5  -4   33.75    1.80
  -9   5   4   34.26    1.56
   9  -5   4   33.69    1.96
  -9  -5  -4   33.00    1.70
   9   5   4   36.17    1.76
  -9   5  -4   35.83    1.70
   9  -5  -4   34.61    1.70
  -9  -5   4   35.88    1.96
   9   6  -4   19.60    1.45
  -9  -6  -4   17.94    1.38
  -9   6   4   20.07    1.24
  -9  -6  -4   17.25    1.32
   9  -6   4   19.57    1.62
   9  -6  -4   20.76    1.53
   9   6   4   19.77    1.35
  -9   7   4    4.66    0.90
  -9  -7  -4    5.78    1.02
   9   7  -4    6.84    1.23
   9  -7   4    5.05    1.38
  -9  -7   4    7.52    1.53
   9  -7  -4    6.25    1.14
   9   7   4    5.70    1.11
  -9   0  -5    0.24    0.45
  -9   0   5    0.00    0.52
   9   0   5    0.07    0.50
   9   0  -5    0.07    0.50
  -9  -1  -5    7.00    0.69
  -9   1   5    6.82    0.73
   9  -1   5    6.00    0.73
   9   1  -5    7.90    0.75
   9   1   5    7.92    0.57
  -9   1  -5    7.28    0.70
   9   1   5    7.16    0.71
   9  -1  -5    6.28    0.69
  -9  -1   5    7.07    0.82
   9  -2   5    6.83    0.79
  -9   2   5    7.78    0.77
  -9   2   5   10.45    1.15
  -9  -2  -5    6.87    0.73
  -9   2  -5    7.20    0.71
   9  -2  -5    7.15    0.63
   9   2   5    8.07    0.78
   9   2   5    7.18    0.64
   9   3  -5   11.31    1.04
  -9   3   5   12.72    0.92
  -9  -3  -5   11.76    0.91
  -9   3   5   12.53    0.92
   9  -3   5   15.28    1.14
   9   3   5   12.77    0.86
   9  -3  -5   12.30    0.96
   9   3   5   12.98    0.96
  -9  -3   5   12.32    1.11
  -9   3  -5   10.75    1.04
   9  -4   5    8.02    1.00
  -9   4   5   10.56    0.81
   9   4  -5   10.08    1.05
   9   4   5   14.21    0.98
  -9  -4   5   10.59    1.14
   9  -4  -5   10.43    0.91
  -9   4  -5   10.06    0.87
   9   4   5   11.73    1.02
   9   5  -5   32.33    1.85
  -9  -5  -5   32.82    1.59
   9  -5   5   31.17    1.97
  -9   5   5   31.53    1.54
   9   5   5   34.47    1.68
   9   5   5   32.97    1.76
  -9   5  -5   30.06    1.58
   9  -5  -5   32.63    1.66
  -9  -6  -5    4.14    0.89
  -9   6   5    4.00    0.79
   9  -6   5    4.25    1.18
   9   6  -5    4.68    1.08
  -9  -6   5    4.18    1.34
   9  -6  -5    4.75    0.96
  -9   6  -5    5.07    0.89
   9   6   5    5.23    0.99
  -9   7   5    9.26    1.19
  -9  -7  -5    6.91    1.11
   9  -7  -5    8.51    1.24
  -9  -7   5   10.92    1.66
   9   7   5    8.19    1.28
  -9   0   6    0.15    0.58
   9   0  -6   -0.88    0.86
   9   0   6    0.14    0.52
   9   1  -6   18.07    1.14
  -9   1   6   16.75    1.18
   9  -1   6   17.21    1.19
   9  -1  -6   17.51    1.10
   9  -1  -6   16.67    1.05
  -9   1  -6   19.22    1.23
   9   1   6   17.84    1.14
   9   2  -6    6.84    0.84
   9  -2   6    5.71    0.79
  -9   2   6    6.34    0.77
  -9   2   6    6.35    0.68
  -9  -2  -6    6.60    0.94
   9   2   6    7.25    0.80
  -9  -2   6    5.18    0.86
   9  -2  -6    6.07    0.63
  -9   2  -6    5.52    0.69
   9   3  -6   28.10    1.57
  -9  -3  -6   28.13    1.48
   9  -3   6   27.96    1.60
  -9   3   6   28.01    1.44
  -9   3   6   28.95    1.34
   9   3   6   30.86    1.33
  -9   3  -6   29.07    1.43
  -9  -3   6   27.71    1.72
   9  -3  -6   29.79    1.37
  -9  -4  -6   27.79    1.46
  -9   4   6   26.93    1.36
   9  -4   6   26.31    1.69
   9   4   6   29.79    1.63
  -9   4  -6   27.34    1.44
   9   4   6   26.82    1.39
   9   5  -6   29.12    1.76
  -9   5   6   27.26    1.42
  -9  -5  -6   27.18    1.49
   9  -5   6   29.76    1.88
  -9  -5   6   29.92    2.09
   9  -5  -6   28.71    1.64
  -9   5  -6   27.12    1.56
   9   5   6   28.60    1.58
   9   5   6   26.52    1.76
  -9   6   6   39.66    1.87
   9   6  -6   42.17    2.27
   9  -6   6   36.75    2.27
  -9  -6  -6   43.11    2.04
  -9  -6   6   40.82    2.54
   9   6   6   40.87    2.03
  -9   6  -6   41.20    1.98
   9  -6  -6   38.95    2.07
   9  -7   6   12.36    1.67
  -9  -7  -6   12.45    1.32
  -9   7   6   12.85    1.19
   9   7  -6   14.05    1.55
   9   7   6   15.43    1.44
  -9  -7   6   12.96    1.77
   9  -7  -6   15.80    1.57
  -9   0  -7    0.65    0.55
   9   0   7   -0.32    0.57
   9   0  -7   -0.65    0.58
  -9  -1  -7    1.94    0.58
  -9   1   7    1.93    0.76
   9  -1   7    1.72    0.65
   9   1  -7    1.84    0.68
  -9  -1   7    1.36    0.78
   9  -1  -7    1.79    0.61
  -9   1  -7    1.46    0.58
   9   1   7    1.74    0.64
   9   2  -7   10.66    0.98
  -9   2   7   12.56    0.92
   9  -2   7   10.31    0.98
  -9  -2  -7   10.67    0.91
  -9   2  -7   11.51    0.92
   9  -2  -7   11.34    0.92
   9   2   7   13.31    1.03
  -9   3   7    1.44    0.79
   9   3  -7    0.43    0.72
   9  -3   7    0.93    0.74
  -9   3   7    1.38    0.56
  -9  -3  -7    1.15    0.63
   9  -3  -7    0.81    0.61
  -9  -3   7    1.42    0.98
  -9   3  -7    1.60    0.66
   9   3   7    0.88    0.72
  -9  -4  -7   31.97    1.62
   9  -4   7   33.63    1.83
  -9   4   7   33.32    1.51
   9   4  -7   30.52    1.76
  -9  -4   7   32.41    2.04
  -9   4  -7   33.21    1.65
   9  -4  -7   30.35    1.58
   9   4   7   28.67    1.79
  -9  -5  -7   20.33    1.42
  -9   5   7   17.21    1.23
   9  -5   7   21.79    1.75
   9   5  -7   21.74    1.63
   9  -5  -7   19.07    1.45
   9   5   7   18.46    1.47
  -9  -5   7   17.64    1.61
  -9   5  -7   20.73    1.47
   9   5   7   21.30    1.50
  -9  -6  -7   29.48    1.84
   9   6  -7   33.38    2.12
   9  -6   7   28.05    2.17
  -9   6   7   31.68    1.70
   9  -6  -7   29.69    1.91
  -9   6  -7   27.90    1.83
   9   6   7   31.84    1.82
  -9  -6   7   29.85    2.39
   9   7  -7   13.31    1.58
   9  -7   7   13.57    1.68
  -9  -7  -7   13.16    1.41
  -9   7   7   12.49    1.24
   9   7   7   14.44    1.42
   9  -7  -7   16.59    1.72
   9   0  -8    0.62    0.66
   9   0   8    0.22    0.64
  -9   0   8    0.07    0.84
  -9   0  -8   -0.06    0.56
  -9   1   8    2.30    0.98
   9   1  -8    1.31    0.69
   9  -1   8    1.83    0.73
  -9  -1  -8    1.30    0.63
   9  -1  -8    2.39    0.70
  -9   1  -8    2.30    0.64
   9   1   8    2.13    0.72
  -9  -1   8    2.80    0.95
  -9   2   8    5.68    0.92
   9   2  -8    2.72    0.82
   9  -2   8    4.28    0.84
  -9   2   8    4.53    0.73
  -9  -2  -8    5.10    0.76
  -9   2  -8    5.22    0.78
   9   2   8    4.67    0.83
  -9  -2   8    5.70    1.09
   9   3  -8    8.66    1.07
  -9   3   8    8.34    0.88
  -9  -3  -8    8.27    0.89
  -9   3   8    7.71    0.97
   9  -3   8    7.83    1.00
   9   3   8    8.17    1.03
   9  -3  -8    7.68    0.84
  -9   3  -8    8.82    0.92
  -9  -3   8    5.01    1.09
   9  -4   8   34.00    1.95
  -9   4   8   36.64    1.65
   9   4  -8   30.81    1.87
  -9  -4  -8   33.83    1.77
   9  -4  -8   35.11    1.74
  -9  -4   8   34.42    2.18
   9   4   8   34.42    1.99
  -9   4  -8   33.38    1.78
  -9  -5  -8    7.27    0.97
   9   5  -8    7.29    1.17
   9  -5   8    7.75    1.18
  -9   5   8    6.68    0.90
   9   5   8    9.28    1.28
   9  -5  -8    8.30    1.09
  -9  -5   8    9.57    1.46
  -9   5  -8    7.89    1.01
   9  -6   8    6.92    1.35
  -9   6   8    9.90    1.07
  -9  -6  -8   10.34    1.27
   9  -6  -8    9.67    1.26
  -9  -6   8    8.20    1.63
  -9   6  -8    9.82    1.19
  -9   0   9   -0.54    0.81
   9   0  -9   -0.26    0.71
   9   0   9    0.24    0.70
  -9   0  -9   -0.05    0.62
  -9   1   9    4.08    0.93
   9   1  -9    5.43    0.90
   9  -1   9    4.24    0.86
  -9  -1  -9    4.76    0.80
  -9   1  -9    3.66    0.74
  -9  -1   9    4.45    1.06
   9   1   9    2.60    0.75
   9  -1  -9    4.60    0.86
  -9  -2  -9    5.76    0.82
  -9   2   9    5.37    0.96
   9  -2   9    5.60    0.94
   9   2  -9    5.41    0.94
  -9  -2   9    5.35    1.07
   9   2   9    4.09    0.90
  -9   2  -9    5.09    0.84
   9  -3   9    4.61    0.99
   9   3  -9    3.61    0.97
  -9   3   9    3.98    0.76
  -9  -3  -9    2.78    0.76
  -9   3  -9    3.72    0.83
  -9  -3   9    3.01    1.08
   9   3   9    3.29    0.96
  -9  -4  -9   16.00    1.24
   9  -4   9   14.61    1.36
   9   4  -9   10.46    1.22
  -9   4   9   15.78    1.18
  -9  -4   9   16.23    1.56
   9   4   9   16.21    1.49
  -9   4  -9   15.53    1.23
   9  -4  -9   15.61    1.21
   9   5  -9   16.42    1.48
  -9   5   9   15.20    1.27
   9  -5   9   16.74    1.57
   9   5   9   14.93    1.57
  -9   5  -9   16.42    1.33
  -9  -5   9   17.90    1.70
   9  -5  -9   18.95    1.42
  -9   6   9    2.80    0.91
   9   6  -9    3.97    1.28
   9  -6   9    3.27    1.28
  -9  -6  -9    2.80    1.12
  -9   6  -9    3.18    1.09
   9  -6  -9    2.10    1.15
  -9  -6   9    2.79    1.51
   9   0  10   -0.02    0.76
   9   0 -10   -0.25    0.79
  -9   0 -10   -0.30    0.70
  -9   0  10   -0.24    0.87
  -9  -1 -10    0.78    0.75
  -9   1  10    1.15    0.93
   9  -1  10    0.80    0.82
   9   1 -10    1.71    0.86
  -9  -1  10    1.92    0.97
   9  -1 -10    1.39    0.80
   9   1  10    1.00    0.78
  -9   1 -10    1.23    0.73
   9  -2  10   24.97    1.70
  -9   2  10   23.40    1.68
  -9  -2 -10   20.69    1.49
   9   2 -10   21.73    1.52
   9   2  10   25.73    1.71
   9  -2 -10   26.28    1.60
  -9   2 -10   22.66    1.57
  -9  -2  10   24.09    1.89
   9  -3  10   31.97    1.97
  -9   3  10   29.42    1.60
  -9  -3 -10   28.16    1.70
   9   3 -10   27.70    1.87
  -9   3 -10   31.33    1.81
  -9  -3  10   33.28    2.18
   9   3  10   27.23    2.00
  -9   4  10   11.32    1.12
  -9  -4 -10   14.28    1.24
   9  -4  10   12.77    1.41
   9   4 -10   10.59    1.32
   9   4  10   12.06    1.42
  -9  -4  10   12.07    1.50
  -9   4 -10   13.03    1.24
  -9   5  10   29.50    1.77
   9   5 -10   27.19    2.49
   9  -5  10   34.19    2.25
   9  -5 -10   31.80    2.25
  -9  -5  10   27.02    2.17
   9   5  10   28.53    2.66
  -9   0  11    0.96    1.04
   9   0  11    0.22    0.92
   9   0 -11    0.07    0.90
  -9   0 -11   -0.20    0.77
  -9   1  11    1.51    1.06
   9   1 -11    1.74    0.93
   9  -1  11    0.95    0.91
  -9  -1 -11    1.67    0.85
   9  -1 -11    2.16    0.92
   9   1  11    1.13    0.91
  -9   1 -11    2.31    0.89
  -9  -1  11    1.42    1.06
  -9   2  11   19.06    1.53
  -9  -2 -11   20.25    1.52
   9   2 -11   19.15    1.51
   9  -2  11   15.93    1.40
  -9   2 -11   21.06    1.45
   9   2  11   19.14    1.59
  -9  -2  11   19.98    1.74
   9  -2 -11   17.89    1.42
  -9   3  11    4.71    0.96
   9  -3  11    4.10    1.12
   9   3 -11    3.83    1.14
  -9  -3 -11    4.21    0.97
  -9  -3  11    3.27    1.32
  -9   3 -11    4.02    1.03
   9   3  11    3.71    1.21
   9  -4  11    3.08    1.20
   9   4 -11    1.53    2.12
  -9   4  11    3.51    0.95
  -9  -4 -11    3.57    1.08
   9   4  11    2.81    1.34
  -9  -4  11    3.58    1.42
  -9   4 -11    3.00    1.06
  -9   0 -12    0.05    0.89
  -9   0  12   -0.22    1.11
   9   0 -12   -0.05    1.02
   9   0  12    0.37    0.93
  -9  -1 -12    2.84    0.98
   9  -1  12    3.62    1.81
  -9   1  12    3.27    1.25
   9   1 -12    2.78    1.07
  -9  -1  12    2.92    1.24
   9  -1 -12    3.73    1.10
   9   1  12    2.53    1.31
  -9   1 -12    2.95    1.15
  -9  -2 -12   13.65    1.31
   9  -2  12   14.31    1.56
   9   2 -12   14.94    1.47
   9  -2 -12   13.27    1.49
   9   2  12   10.39    1.76
  -9   2 -12   12.66    1.34
   9  -3  12    2.20    1.12
  -9  -3 -12    1.43    1.00
  -9  -3  12    0.82    1.36
   9  -3 -12    1.84    1.05
  -9   3 -12    0.69    1.02
   9   3  12    2.25    1.29
   9   0 -13    0.56    1.95
  -9   0 -13   -0.24    1.00
   9   0  13    0.75    1.06
  -9   0  13    0.71    1.35
   9  -1  13    1.86    1.23
  -9  -1 -13    2.16    1.08
  -9   1  13    1.74    1.33
   9   1 -13    1.23    1.29
   9   1  13    1.92    1.22
  -9   1 -13    2.40    1.11
  -9  -1  13    3.23    1.40
   9  -1 -13    2.45    1.18
  10   0   0  212.21    6.33
 -10   0   0  208.78    6.39
  10   0   0  205.94    6.26
  10  -1   0   32.30    1.41
  10  -1   0   31.17    1.30
  10   1   0   30.96    1.32
 -10   1   0   33.94    1.40
  10   1   0   32.10    1.41
 -10  -1   0   32.52    1.43
 -10   2   0   37.32    1.51
  10   2   0   34.77    1.57
 -10   2   0   37.02    1.39
  10  -2   0   39.83    1.68
  10   2   0   34.55    1.33
 -10  -2   0   36.16    1.60
 -10   3   0    7.19    0.62
  10   3   0    7.45    0.86
  10  -3   0    6.61    0.85
 -10   3   0    9.36    0.74
 -10  -4   0    5.51    0.85
 -10   4   0    5.70    0.60
 -10   4   0    6.52    0.68
  10  -4   0    4.59    1.01
  10   4   0    5.23    0.87
 -10   5   0    0.05    0.54
 -10  -5   0    0.20    0.80
  10  -5   0   -0.12    0.73
  10   5   0    0.56    0.81
 -10   6   0   15.31    1.11
  10   6   0   14.18    1.30
 -10  -6   0   13.51    1.32
  10  -6   0   11.85    1.21
  10  -7   0    1.48    1.00
  10   7   0    2.51    1.12
 -10   7   0    1.64    0.81
 -10  -7   0    1.39    1.19
 -10   0  -1  120.71    3.84
  10   0   1  118.84    3.74
  10   0   1  117.76    3.75
 -10   0   1  121.43    3.86
  10   0  -1  121.14    3.79
  10   0  -1  117.99    3.70
  10  -1   1   85.84    2.91
  10   1  -1   84.98    2.69
 -10   1   1   86.07    2.90
  10  -1   1   87.71    2.80
 -10  -1  -1   87.26    2.93
  10   1  -1   92.57    2.95
  10   1   1   88.18    2.87
 -10   1  -1   86.25    2.90
 -10  -1   1   85.91    2.97
  10   1   1   87.93    2.79
  10  -1  -1   86.87    2.84
  10  -1  -1   84.59    2.86
 -10  -2  -1   39.79    1.71
 -10   2   1   44.44    1.68
 -10   2   1   43.32    1.60
  10  -2   1   42.46    1.60
  10   2  -1   41.61    1.76
  10  -2   1   46.77    1.83
 -10  -2   1   42.70    1.81
 -10   2  -1   44.15    1.71
  10   2   1   43.21    1.74
  10   2   1   42.40    1.56
  10  -2  -1   42.35    1.78
 -10   3   1   35.92    1.45
 -10   3   1   35.18    1.41
 -10  -3  -1   39.21    1.76
  10   3  -1   35.91    1.68
  10  -3   1   31.99    1.72
  10  -3  -1   36.18    1.62
  10   3   1   33.46    1.60
 -10   3  -1   35.00    1.50
 -10   3  -1   34.90    1.36
  10   3   1   33.44    1.40
  10   4  -1   27.23    1.58
 -10   4   1   29.39    1.30
 -10  -4  -1   27.68    1.50
 -10  -4  -1   28.38    1.53
 -10   4   1   25.67    1.22
  10  -4   1   28.15    1.64
 -10   4  -1   29.52    1.38
  10   4   1   27.31    1.72
 -10  -4   1   27.08    1.65
 -10   4  -1   30.57    1.23
  10  -5   1   12.11    1.15
 -10   5   1   13.50    0.93
 -10  -5  -1   14.74    1.20
  10   5  -1   14.39    1.21
 -10   5  -1   14.43    1.00
 -10   5  -1   14.89    1.14
 -10  -5   1   13.28    1.22
  10  -5  -1   13.38    1.14
  10   5   1   14.23    1.18
  10   6  -1    3.83    1.03
  10  -6   1    1.70    0.99
 -10   6   1    2.68    0.71
 -10  -6  -1    2.73    0.99
 -10  -6   1    2.63    1.03
  10   6   1    2.65    1.01
 -10   6  -1    2.49    0.67
  10  -6  -1    2.82    0.95
  10  -7   1    3.46    1.22
  10   7  -1    5.70    1.24
 -10   7   1    5.10    0.89
 -10   7  -1    5.33    0.88
  10  -7  -1    3.92    1.13
 -10  -7   1    3.99    1.29
  10   7   1    5.59    1.23
  10   0   2   16.43    0.97
  10   0  -2   18.64    1.01
 -10   0   2   16.56    1.06
  10   0  -2   17.62    0.85
 -10   0  -2   16.08    1.02
  10   0   2   16.05    0.98
  10  -1   2   50.24    1.91
  10  -1   2   50.87    1.75
  10   1  -2   51.66    1.94
 -10  -1  -2   51.00    1.90
 -10   1   2   49.18    1.89
  10  -1  -2   47.78    1.83
  10  -1  -2   48.41    1.83
  10   1   2   45.56    1.80
  10   1   2   49.67    1.80
 -10  -1   2   48.89    1.96
 -10   1  -2   51.28    1.91
 -10   2   2    9.30    0.69
  10  -2   2    8.48    0.85
 -10  -2  -2    9.36    0.79
  10   2  -2    7.69    0.82
 -10   2   2    9.38    0.75
  10  -2   2    8.60    0.64
  10   2   2    7.91    0.67
  10  -2  -2    7.91    0.74
 -10  -2   2    5.78    0.78
 -10   2  -2    7.56    0.73
  10   2   2    7.74    0.77
 -10   3   2   22.26    1.15
  10  -3   2   23.01    1.45
 -10   3   2   22.90    1.12
 -10   3  -2   22.99    1.01
 -10  -3   2   22.82    1.43
  10   3   2   19.53    1.25
  10   3   2   21.41    1.13
  10  -3  -2   22.75    1.26
 -10   3  -2   23.58    1.23
 -10   4   2    6.99    0.71
  10   4  -2    8.15    0.98
 -10  -4  -2    6.64    0.81
  10  -4   2    6.12    0.99
 -10   4   2    7.50    0.70
  10   4   2    6.56    1.03
  10  -4  -2    8.40    0.95
  10   4   2    6.73    0.77
 -10   4  -2    6.66    0.62
 -10  -4   2    8.35    1.01
 -10   4  -2    7.67    0.78
  10  -5   2   21.77    1.66
 -10  -5  -2   16.95    1.38
  10   5  -2   19.99    1.49
 -10   5   2   19.20    1.16
  10  -5  -2   19.39    1.41
  10   5   2   18.42    1.38
 -10   5  -2   17.30    1.07
 -10   5  -2   18.72    1.29
 -10  -5   2   16.39    1.36
 -10   6   2    4.94    0.77
  10  -6   2    5.24    1.15
 -10  -6  -2    4.30    1.01
  10   6  -2    5.94    1.11
 -10  -6   2    4.85    1.14
  10   6   2    5.00    1.04
 -10   6  -2    5.44    0.75
  10  -6  -2    3.56    0.95
  10   7  -2   -0.07    1.11
  10  -7   2   -1.05    1.15
 -10   7   2   -0.01    0.80
  10  -7  -2    0.14    0.99
 -10  -7   2    0.61    1.27
  10   7   2    1.07    1.15
 -10   0   3   60.78    2.31
  10   0   3   66.02    2.23
  10   0   3   62.97    2.11
 -10   0  -3   58.08    2.25
  10   0  -3   62.28    2.02
  10   0  -3   62.62    2.22
 -10  -1  -3   27.33    1.34
  10  -1   3   30.94    1.19
 -10   1   3   27.17    1.38
  10   1  -3   29.85    1.37
  10  -1   3   31.43    1.39
  10   1   3   29.21    1.30
 -10   1  -3   27.64    1.34
  10   1   3   30.22    1.30
  10  -1  -3   27.41    1.26
 -10  -1   3   25.23    1.43
  10  -1  -3   28.40    1.30
 -10   2   3   16.62    0.97
  10  -2   3   19.15    0.91
 -10  -2  -3   19.17    1.11
  10  -2   3   19.00    1.26
  10   2  -3   19.97    1.20
 -10   2   3   17.34    1.11
  10   2   3   18.41    1.12
  10  -2  -3   19.06    1.08
 -10   2  -3   20.96    1.15
  10   2   3   17.67    1.06
 -10  -3  -3    9.41    0.88
 -10   3   3    9.35    0.81
  10   3  -3    8.37    0.87
  10   3   3   10.11    0.87
 -10  -3   3    9.20    1.01
 -10   3  -3    9.47    0.63
 -10   3  -3    9.99    0.83
  10   3   3    8.63    0.78
  10  -3  -3    9.37    0.82
 -10   4   3   19.73    1.19
  10  -4   3   21.73    1.53
  10   4  -3   21.77    1.44
 -10  -4  -3   19.06    1.25
 -10   4   3   21.65    1.15
 -10  -4   3   20.01    1.55
 -10   4  -3   22.39    1.17
  10   4   3   19.19    1.25
  10   4   3   20.71    1.34
  10  -4  -3   21.57    1.45
 -10   4  -3   20.28    1.23
 -10   5   3    3.19    0.67
  10   5  -3    2.14    0.91
  10  -5   3    2.49    1.00
 -10  -5  -3    2.48    0.69
 -10  -5  -3    2.70    0.80
 -10  -5   3    2.29    0.97
  10  -5  -3    1.58    0.79
  10   5   3    3.01    0.86
 -10   5  -3    2.71    0.81
  10  -6   3    6.46    1.25
  10   6  -3    6.08    1.12
 -10   6   3    6.56    0.88
 -10  -6  -3    7.18    1.10
  10  -6  -3    7.69    1.07
  10   6   3    9.79    1.17
 -10  -6   3    7.24    1.24
 -10   7   3    3.69    0.87
 -10  -7   3    3.00    1.45
  10  -7  -3    3.56    1.14
  10   7   3    4.38    1.19
 -10   0  -4   19.92    1.15
  10   0   4   19.07    0.99
 -10   0   4   19.54    1.24
  10   0   4   21.76    1.20
  10   0  -4   20.16    1.20
  10  -1   4   30.20    1.27
  10  -1   4   34.28    1.51
 -10   1   4   31.58    1.51
 -10  -1  -4   32.94    1.82
  10   1  -4   32.71    1.50
 -10  -1   4   31.17    1.59
  10  -1  -4   31.63    1.31
  10  -1  -4   31.92    1.46
 -10   1  -4   32.25    1.44
  10   1   4   33.11    1.43
  10   1   4   30.82    1.31
 -10  -2  -4   49.00    2.15
 -10   2   4   51.70    2.00
 -10   2   4   54.16    2.51
  10  -2   4   51.45    2.08
  10   2  -4   55.04    2.12
  10  -2  -4   50.69    1.88
  10   2   4   50.26    1.89
 -10   2  -4   52.14    2.15
 -10  -2   4   53.11    2.18
  10   2   4   47.61    1.95
  10  -3   4   18.29    1.37
 -10   3   4   15.26    1.09
  10   3  -4   18.92    1.31
 -10   3   4   17.25    1.05
 -10  -3  -4   17.32    1.15
  10  -3  -4   17.13    1.13
  10   3   4   17.15    1.17
  10   3   4   17.76    1.14
 -10  -3   4   15.09    1.22
  10  -4   4   16.99    1.34
 -10  -4  -4   18.35    1.19
  10   4  -4   14.47    1.25
 -10   4   4   17.93    1.07
 -10  -4   4   18.09    1.38
 -10   4  -4   18.29    1.23
  10   4   4   17.70    1.28
  10   4   4   16.89    1.26
 -10  -5  -4    7.76    0.94
 -10   5   4    8.58    0.84
  10  -5   4    5.68    1.11
  10   5  -4    7.41    1.07
  10   5   4    8.15    1.00
 -10   5  -4    7.17    0.90
  10  -5  -4    7.86    0.98
 -10  -5   4    7.65    1.18
 -10  -6  -4    1.08    0.83
  10  -6   4    0.48    1.12
  10   6  -4    0.62    1.02
 -10  -6  -4    0.93    0.92
 -10   6   4    0.21    0.73
  10  -6  -4    0.76    0.91
 -10  -6   4    0.41    1.19
  10   6   4    1.06    0.99
 -10   7   4    8.73    1.20
  10  -7   4    6.26    1.51
  10   7  -4    9.26    1.39
  10  -7  -4    9.38    1.33
 -10  -7   4    8.16    1.74
  10   7   4    9.08    1.34
  10   0  -5   28.23    1.40
 -10   0  -5   30.23    1.40
  10   0   5   27.14    1.41
 -10   0   5   29.60    1.54
 -10  -1  -5   31.65    1.50
  10   1  -5   33.39    1.57
 -10   1   5   29.66    1.56
  10  -1   5   31.76    1.52
 -10   1  -5   32.83    1.51
  10   1   5   31.65    1.49
 -10  -1   5   33.61    1.69
  10  -1  -5   34.35    1.50
  10  -2   5   10.74    0.96
  10   2  -5   11.19    1.00
 -10  -2  -5   11.19    0.94
 -10   2   5   13.40    0.99
 -10   2   5    9.31    0.78
  10   2   5   12.54    0.94
 -10  -2   5   11.07    1.10
  10   2   5   13.52    0.96
 -10   2  -5   11.56    0.91
  10  -2  -5   11.41    0.81
 -10   3   5    4.12    0.65
 -10   3   5    5.06    0.76
 -10  -3  -5    5.45    0.74
  10   3  -5    3.72    0.85
  10  -3   5    3.71    0.84
 -10  -3   5    4.88    0.91
 -10   3  -5    4.54    0.73
  10   3   5    6.04    0.76
  10  -3  -5    5.38    0.73
  10   3   5    4.28    0.74
  10  -4   5   22.59    1.64
  10   4  -5   16.65    1.33
 -10   4   5   19.88    1.21
 -10  -4  -5   20.87    1.33
 -10   4  -5   21.94    1.36
  10   4   5   20.45    1.44
  10  -4  -5   20.67    1.60
  10   4   5   22.23    1.38
 -10  -4   5   20.38    1.53
  10   5  -5    2.92    0.99
 -10   5   5    1.79    0.67
 -10  -5  -5    2.42    0.76
  10  -5   5    2.29    1.00
  10   5   5    3.65    0.92
 -10   5  -5    2.67    0.80
  10  -5  -5    3.29    0.87
  10   5   5    2.56    0.89
 -10  -5   5    2.96    1.14
 -10   6   5    0.29    0.76
 -10  -6  -5    1.04    1.11
 -10  -6  -5    0.19    0.83
  10   6  -5    0.27    1.05
  10  -6   5   -0.12    1.10
  10  -6  -5    0.15    0.93
 -10   6  -5    0.22    0.93
 -10  -6   5   -0.47    1.35
  10   6   5    1.05    1.00
  10   7  -5   -0.31    1.21
  10  -7   5   -0.31    1.31
 -10   7   5   -0.42    0.90
 -10  -7   5   -0.01    1.53
  10  -7  -5   -0.13    1.79
  10   7   5    0.77    1.12
  10   0   6   56.12    2.37
 -10   0   6   55.22    2.30
 -10   0  -6   54.56    2.15
  10   0  -6   57.05    2.17
  10  -1   6   54.69    2.22
 -10   1   6   53.87    2.26
  10   1  -6   57.36    2.23
 -10  -1  -6   56.26    2.17
 -10   1  -6   56.23    2.17
  10  -1  -6   56.19    2.17
 -10  -1   6   57.31    2.36
 -10   2   6   43.59    1.81
 -10   2   6   49.22    1.96
  10   2  -6   48.27    1.98
  10  -2   6   46.66    1.97
 -10  -2  -6   41.78    1.88
  10   2   6   39.97    2.07
 -10   2  -6   45.72    1.89
 -10  -2   6   43.92    2.13
  10   3  -6   46.95    2.21
 -10   3   6   52.70    2.03
 -10  -3  -6   54.06    2.15
  10  -3   6   56.62    2.30
 -10   3   6   53.91    2.13
  10   3   6   47.30    2.16
 -10  -3   6   52.52    2.42
  10  -3  -6   53.59    2.05
 -10   3  -6   53.75    2.14
 -10   4   6    1.34    0.63
 -10  -4  -6    1.82    0.70
  10  -4   6    1.49    0.91
  10   4  -6    1.68    0.88
 -10   4  -6    1.60    0.73
 -10  -4   6    1.89    1.06
  10  -4  -6    1.69    0.73
  10   4   6    2.21    0.80
  10   4   6    0.99    0.79
 -10  -5  -6    3.77    0.82
  10   5  -6    3.66    1.09
  10  -5   6    2.50    1.04
 -10   5   6    3.65    0.76
 -10  -5   6    2.52    1.28
  10  -5  -6    3.71    0.90
 -10   5  -6    3.47    0.88
  10   5   6    3.59    0.92
  10   5   6    3.87    1.00
 -10  -6  -6    2.03    0.93
  10  -6   6    2.98    1.17
 -10   6   6    2.25    0.84
  10   6  -6    3.10    1.18
 -10  -6   6    2.08    1.47
  10   6   6    2.36    1.09
  10  -6  -6    1.85    1.00
 -10   6  -6    2.54    0.99
 -10   0  -7   28.09    1.48
  10   0  -7   28.11    1.55
 -10   0   7   28.60    1.66
  10   0   7   26.18    1.54
 -10   1   7   15.03    1.18
 -10  -1  -7   14.38    1.16
  10  -1   7   16.94    1.30
  10   1  -7   12.43    1.06
 -10   1  -7   14.55    1.18
  10  -1  -7   14.27    1.07
 -10  -1   7   15.24    1.27
  10   1   7   15.31    1.24
  10  -2   7    8.29    0.98
 -10   2   7   10.54    1.05
 -10  -2  -7    7.88    0.88
  10   2  -7    8.27    0.99
 -10   2   7    7.11    0.78
 -10   2  -7    7.15    0.84
  10   2   7    6.24    0.87
 -10  -2   7    8.33    1.14
 -10   3   7   45.33    1.90
 -10  -3  -7   43.53    2.01
  10  -3   7   44.73    2.12
  10   3  -7   43.84    2.11
  10  -3  -7   48.10    1.98
 -10   3  -7   48.46    2.03
  10   3   7   43.51    2.09
  10  -4   7    2.64    0.92
 -10  -4  -7    2.52    0.77
  10   4  -7    2.49    0.88
 -10   4   7    1.41    0.68
  10  -4  -7    2.03    0.81
  10   4   7    2.35    0.91
 -10   4  -7    2.84    0.82
 -10  -4   7    3.37    1.28
  10  -5   7    2.29    1.05
  10   5  -7    2.13    1.04
 -10  -5  -7    2.77    0.84
 -10   5   7    2.11    0.74
 -10   5  -7    2.24    0.90
  10   5   7    2.60    1.03
  10  -5  -7    2.27    0.93
 -10  -5   7    2.49    1.38
 -10  -6  -7    0.36    0.96
  10   6  -7    1.28    1.20
  10  -6   7    1.83    1.22
 -10   6   7    0.61    0.79
  10  -6  -7   -0.07    1.01
 -10  -6   7    1.38    1.58
 -10   6  -7    1.36    1.00
  10   0   8   59.11    2.49
 -10   0  -8   61.87    2.44
 -10   0   8   59.97    2.67
  10   0  -8   66.37    2.47
  10  -1   8   39.30    1.91
 -10   1   8   38.77    2.08
  10   1  -8   38.92    1.85
 -10  -1  -8   39.73    1.82
 -10   1  -8   35.53    1.78
  10  -1  -8   39.30    1.82
  10   1   8   34.91    1.85
 -10  -1   8   36.98    2.18
 -10   2   8   48.18    2.28
 -10  -2  -8   51.75    2.12
  10   2  -8   51.41    2.21
  10  -2   8   50.86    2.26
 -10  -2   8   49.67    2.51
 -10   2  -8   47.73    2.09
  10  -2  -8   49.12    2.14
  10   2   8   47.48    2.21
 -10  -3  -8    0.91    0.72
  10   3  -8    1.34    0.92
 -10   3   8    0.78    0.67
  10  -3   8    1.53    0.89
  10   3   8    1.03    0.86
 -10   3  -8    0.69    0.75
 -10  -3   8    1.56    1.19
 -10   4   8    6.40    0.92
  10   4  -8    4.61    1.02
  10  -4   8    5.44    1.06
 -10  -4  -8    4.76    0.92
 -10   4  -8    4.30    0.91
  10   4   8    6.04    1.13
 -10  -4   8    5.26    1.38
  10  -4  -8    5.17    1.14
 -10   5   8    5.23    0.93
  10  -5   8    4.46    1.17
  10   5  -8    5.45    1.23
 -10  -5  -8    4.28    0.96
  10  -5  -8    4.65    1.06
  10   5   8    4.57    1.20
 -10   5  -8    5.82    1.04
 -10  -5   8    6.36    1.48
  10   6  -8    1.02    1.26
  10  -6   8    1.04    1.21
 -10   6   8   -0.18    0.85
 -10  -6  -8    1.24    1.19
 -10  -6   8    0.90    1.47
 -10   6  -8    0.77    1.04
  10  -6  -8    0.27    1.11
 -10   0   9   34.55    2.00
  10   0   9   33.25    1.87
  10   0  -9   33.06    1.86
 -10   0  -9   33.71    1.76
 -10   1   9   21.19    1.58
  10   1  -9   21.37    1.52
  10  -1   9   21.55    1.53
 -10  -1  -9   20.65    1.48
  10   1   9   17.68    1.49
  10  -1  -9   22.04    1.56
 -10  -1   9   23.59    1.83
 -10   1  -9   20.50    1.49
  10  -2   9   41.83    2.07
 -10   2   9   41.33    2.11
  10   2  -9   42.01    2.13
 -10  -2  -9   39.63    1.95
 -10  -2   9   42.51    2.35
  10  -2  -9   43.16    2.04
 -10   2  -9   42.32    1.97
  10   2   9   38.79    2.09
  10  -3   9    5.66    1.07
  10   3  -9    3.34    1.02
 -10   3   9    4.72    0.85
 -10  -3  -9    4.38    0.94
 -10   3  -9    5.30    0.96
 -10  -3   9    5.44    1.27
  10   3   9    3.66    1.05
  10  -4   9    0.39    0.99
  10   4  -9    0.40    1.00
 -10   4   9    0.11    0.78
 -10  -4  -9    0.54    0.87
  10   4   9    1.24    1.06
 -10  -4   9    1.31    1.22
 -10   4  -9    0.85    0.89
  10  -5   9    0.86    1.09
 -10   5   9    0.67    0.85
  10   5  -9    0.67    1.14
  10   5   9   -0.32    1.18
 -10  -5   9    1.38    1.38
 -10   5  -9    0.43    0.98
  10   0 -10   17.46    1.39
 -10   0  10   16.36    1.51
  10   0  10   18.65    1.45
 -10   0 -10   17.91    1.35
  10   1 -10    1.34    0.93
 -10   1  10    2.26    1.02
 -10  -1 -10    1.83    0.84
  10  -1  10    1.79    0.90
  10  -1 -10    2.47    0.92
  10   1  10    2.27    0.88
 -10  -1  10    1.34    1.07
 -10   1 -10    1.39    0.83
  10   2 -10    4.52    1.08
  10  -2  10    4.23    0.99
 -10   2  10    3.65    1.14
 -10  -2 -10    3.06    0.90
 -10   2 -10    3.54    0.90
  10   2  10    3.02    1.02
 -10  -2  10    4.20    1.20
  10  -2 -10    4.00    0.96
  10  -3  10   31.13    2.04
 -10  -3 -10   28.81    1.84
  10   3 -10   27.25    2.03
 -10   3  10   30.48    1.73
 -10  -3  10   28.93    2.19
  10   3  10   27.93    2.12
 -10   3 -10   29.62    1.84
 -10   4  10    1.49    0.87
  10  -4  10    1.40    1.13
 -10  -4 -10    1.19    1.00
 -10  -4  10    0.64    1.30
  10   4  10    1.96    1.25
  10   0 -11   22.22    1.61
  10   0  11   24.60    1.87
 -10   0  11   19.23    1.69
 -10   0 -11   21.10    1.68
 -10   1  11   17.30    1.60
  10   1 -11   18.24    1.52
 -10  -1 -11   19.79    1.46
  10  -1  11   18.18    1.53
 -10  -1  11   21.63    1.79
  10  -1 -11   16.44    1.44
  10   1  11   13.35    1.39
 -10   1 -11   18.77    1.41
  10  -2  11    1.22    1.57
 -10  -2 -11    1.97    0.94
 -10   2  11    1.98    1.32
  10   2 -11    2.25    1.10
 -10  -2  11    2.90    1.32
  10   2  11    2.60    1.12
 -10   2 -11    2.63    1.11
  10  -2 -11    0.93    1.03
  10  -3  11    9.80    1.36
 -10  -3 -11   11.26    1.26
 -10   3 -11    8.56    1.17
 -10  -3  11   10.60    1.62
  10  -3 -11   11.04    1.30
  10   3  11    8.32    1.72
 -10   0 -12    8.02    1.22
 -10   0  12    8.92    1.46
  10   0  12    5.68    1.16
  10   1 -12    3.02    2.11
 -10   1  12    1.46    1.26
  10  -1  12    2.86    1.16
 -10  -1 -12    1.98    1.20
 -10   1 -12    0.87    0.99
  10   1  12    1.17    1.13
  10  -1 -12    3.15    1.20
 -10  -2 -12   13.51    1.53
  10  -2  12   11.88    1.44
  10   2 -12   15.73    1.60
  10  -2 -12   15.89    1.47
 -10  -2  12   13.85    1.77
 -10   2 -12   13.53    1.40
  10   2  12   14.13    1.62
 -11   0   0    0.42    0.48
  11   0   0    0.21    0.54
  11   0   0    0.16    0.44
  11  -1   0    1.73    0.60
  11   1   0    1.80    0.43
 -11   1   0    1.56    0.53
  11   1   0    1.65    0.64
  11  -1   0    1.46    0.53
 -11   2   0   26.19    1.30
  11   2   0   25.35    1.39
 -11  -2   0   25.03    1.40
  11  -2   0   25.21    1.22
  11  -2   0   25.34    1.43
 -11  -3   0   46.02    2.02
 -11   3   0   48.45    1.85
  11  -3   0   46.60    2.07
 -11   3   0   44.93    1.74
  11  -4   0    4.62    0.94
 -11   4   0    5.21    0.67
  11   4   0    3.19    0.90
 -11  -4   0    4.57    0.89
 -11   4   0    5.18    0.71
  11   5   0    8.30    1.11
 -11   5   0    8.22    0.79
  11  -5   0    7.32    1.08
 -11  -5   0    6.05    1.05
 -11   6   0   63.23    2.39
  11  -6   0   60.38    2.82
  11   6   0   64.08    2.75
 -11  -6   0   66.34    2.90
 -11   7   0   20.21    1.31
 -11  -7   0   19.78    1.77
  11   0  -1    0.20    0.43
  11   0  -1   -0.08    0.55
 -11   0   1    0.19    0.51
  11   0   1   -0.12    0.47
 -11   0  -1   -0.13    0.49
  11   0   1   -0.06    0.56
  11  -1   1   17.39    1.02
 -11  -1  -1   19.08    1.34
 -11   1   1   18.12    1.13
  11  -1   1   18.60    1.12
  11   1  -1   17.74    1.19
  11  -1  -1   16.47    1.11
  11   1   1   17.07    1.17
  11  -1  -1   17.69    1.06
  11   1   1   18.78    0.98
 -11   1  -1   17.51    1.09
 -11   2   1    2.43    0.57
  11   2  -1    2.82    0.74
 -11  -2  -1    2.98    0.63
  11  -2   1    3.03    0.57
  11  -2   1    3.21    0.73
  11   2   1    2.20    0.70
  11  -2  -1    2.34    0.60
  11   2   1    3.18    0.53
 -11  -2   1    1.90    0.65
  11  -2  -1    3.17    0.75
 -11   2  -1    2.56    0.60
  11  -3   1    2.06    0.80
 -11  -3  -1    1.99    0.68
 -11   3   1    2.10    0.54
  11   3  -1    2.77    0.81
 -11   3   1    2.07    0.59
 -11  -3   1    1.51    0.73
  11   3   1    2.35    0.77
 -11   3  -1    1.85    0.52
 -11   3  -1    2.73    0.63
  11  -3  -1    1.28    0.74
  11   4  -1    3.81    0.90
 -11   4   1    4.18    0.65
 -11  -4  -1    4.23    0.86
 -11   4   1    3.78    0.68
  11  -4   1    2.66    0.93
  11  -4  -1    4.10    0.89
  11   4   1    3.61    0.90
 -11   4  -1    3.40    0.62
 -11  -4   1    2.14    0.86
 -11   4  -1    3.81    0.70
  11  -5   1    6.56    1.15
 -11   5   1    7.66    0.81
  11   5  -1    8.76    1.13
 -11  -5  -1    8.82    1.11
 -11  -5   1    5.99    1.12
 -11   5  -1    8.88    1.02
 -11   5  -1    9.87    0.81
  11  -5  -1    7.75    1.05
  11   5   1    6.79    1.07
  11  -6   1   13.23    1.44
 -11   6   1   13.77    1.07
 -11  -6  -1   12.73    1.39
  11   6  -1   14.56    1.41
 -11   6  -1   14.81    1.06
  11  -6  -1   14.46    1.37
 -11  -6   1   13.79    1.47
  11   6   1   15.48    1.42
  11  -7   1    2.86    1.61
 -11   7   1    3.06    0.90
  11   7  -1    3.60    1.34
 -11  -7  -1    2.38    1.63
 -11  -7   1    3.38    1.40
  11   7   1    2.76    1.43
  11   0   2   -0.17    0.55
  11   0  -2   -0.31    0.55
 -11   0   2    0.12    0.53
  11   0   2    0.16    0.49
  11  -1   2   35.57    1.57
  11   1  -2   34.87    1.62
 -11   1   2   34.66    1.57
 -11  -1  -2   34.25    1.55
  11  -1   2   35.24    1.42
  11   1   2   36.63    1.45
 -11   1  -2   33.21    1.83
  11  -1  -2   36.09    1.51
 -11  -1   2   35.49    1.67
  11  -1  -2   34.07    1.49
  11   1   2   34.60    1.52
 -11  -2  -2    5.03    0.69
  11   2  -2    4.30    1.41
 -11   2   2    4.66    0.67
  11  -2   2    5.11    0.61
  11  -2   2    4.95    0.79
 -11  -2   2    4.42    0.80
  11   2   2    5.21    0.62
  11  -2  -2    4.76    0.77
  11  -2  -2    4.55    0.68
 -11   2  -2    4.25    0.76
  11   2   2    4.20    0.76
 -11   3   2   55.72    2.01
 -11  -3  -2   54.27    2.14
  11  -3   2   53.78    2.28
  11   3  -2   51.73    2.16
 -11   3   2   52.93    2.03
 -11   3  -2   51.32    1.87
 -11   3  -2   57.06    2.36
  11   3   2   49.96    2.09
  11  -3  -2   52.42    2.12
 -11  -3   2   52.37    2.29
  11   3   2   49.69    1.97
 -11  -4  -2   39.93    1.84
  11  -4   2   37.34    2.05
 -11   4   2   38.64    1.62
 -11   4   2   39.02    1.69
  11   4  -2   36.64    1.94
  11  -4  -2   35.21    1.79
 -11   4  -2   38.49    1.54
  11   4   2   39.90    1.87
 -11  -4   2   35.14    2.02
  11  -5   2   56.59    2.59
  11   5  -2   51.19    2.36
 -11  -5  -2   50.70    2.32
 -11   5   2   51.54    1.99
 -11  -5   2   49.46    2.49
  11  -5  -2   46.65    2.26
 -11   5  -2   50.07    2.35
  11   5   2   53.29    2.25
  11   6  -2    9.43    1.33
  11  -6   2    8.69    1.37
 -11  -6  -2   10.94    1.31
 -11   6   2   10.04    0.98
  11   6   2   11.86    1.32
 -11  -6   2   11.20    1.42
  11  -6  -2   11.75    1.26
  11  -7   2   18.78    1.82
 -11   7   2   20.19    1.39
  11   7  -2   19.21    1.74
  11   7   2   20.19    1.71
 -11  -7   2   23.12    1.95
  11   0   3   -0.45    0.55
  11   0   3    0.10    0.51
  11   0  -3    0.11    0.66
 -11   0  -3   -0.06    0.53
  11  -1   3    0.47    0.53
  11  -1   3    0.47    0.58
 -11   1   3    1.65    0.62
  11   1  -3    0.75    0.84
 -11  -1  -3    0.31    0.54
  11  -1  -3    0.17    0.57
  11   1   3    1.17    0.53
  11  -1  -3    0.75    0.74
  11   1   3    0.83    0.61
 -11  -1   3    1.25    0.67
 -11   1  -3    0.54    0.58
  11  -2   3    3.15    0.57
  11  -2   3    3.09    0.74
  11   2  -3    3.18    0.78
 -11   2   3    3.13    0.68
 -11  -2  -3    2.91    0.65
  11   2   3    3.57    0.63
  11  -2  -3    2.64    0.66
  11  -2  -3    2.93    0.65
 -11   2  -3    2.46    0.65
  11   2   3    3.26    0.71
 -11  -2   3    2.12    0.76
 -11   3   3   17.09    1.20
 -11   3   3   16.93    1.05
 -11  -3  -3   17.78    1.21
  11  -3   3   15.09    1.21
  11   3  -3   17.51    1.31
 -11   3  -3   17.92    1.24
  11   3   3   16.66    1.24
  11  -3  -3   19.94    1.24
  11   3   3   15.47    1.17
 -11  -3   3   16.49    1.33
 -11   4   3   10.74    0.97
  11   4  -3    8.47    1.06
  11  -4   3    8.80    1.15
 -11  -4  -3    9.05    0.97
 -11   4   3    9.45    0.85
  11   4   3    8.75    0.93
  11   4   3   10.64    1.08
  11  -4  -3   10.07    1.01
 -11  -4   3    9.76    1.19
 -11   4  -3    9.34    0.94
 -11   5   3    7.98    0.83
  11  -5   3    6.12    1.19
  11   5  -3    6.26    1.10
 -11  -5  -3    5.93    0.97
 -11   5  -3    5.61    0.91
  11   5   3    5.94    1.03
  11  -5  -3    5.60    0.98
 -11  -5   3    5.59    1.18
 -11   6   3    9.24    0.98
  11  -6   3    8.78    1.46
  11   6  -3    9.96    1.35
 -11  -6  -3   10.90    1.32
  11   6   3    8.67    1.24
  11  -6  -3    8.82    1.22
 -11  -6   3    9.35    1.45
  11  -7   3   10.12    1.68
  11   7  -3    9.60    1.48
  11   7   3    8.13    1.41
 -11  -7   3   10.42    1.75
 -11   0   4    0.03    0.62
 -11   0  -4    0.61    0.59
  11   0   4   -0.13    0.55
  11   0  -4   -0.21    0.58
  11  -1   4    1.13    0.60
 -11   1   4    1.80    0.64
 -11  -1  -4    1.44    0.63
  11   1  -4    1.43    0.70
  11   1   4    0.91    0.60
 -11  -1   4    1.37    0.73
  11  -1  -4    1.47    0.62
  11   1   4    1.45    0.57
 -11   1  -4    1.27    0.61
 -11  -2  -4    2.88    0.67
  11   2  -4    3.59    0.82
 -11   2   4    2.20    0.65
  11  -2   4    3.70    0.78
  11  -2  -4    3.86    0.73
  11  -2  -4    2.75    0.65
 -11   2  -4    4.13    0.72
 -11  -2   4    2.93    0.85
  11   2   4    3.68    0.68
  11   2   4    3.87    0.72
 -11  -3  -4   13.72    1.06
  11  -3   4   12.02    1.14
 -11   3   4   12.68    0.96
  11   3  -4   12.01    1.07
 -11   3   4   11.87    1.00
 -11   3  -4   13.17    1.00
  11   3   4   13.78    1.04
 -11  -3   4   12.75    1.24
  11   3   4   12.82    1.01
  11  -3  -4   14.30    1.02
  11  -4   4    6.06    1.04
  11   4  -4    3.91    0.97
 -11   4   4    4.81    0.76
 -11  -4  -4    4.75    0.78
  11  -4  -4    5.22    0.90
  11   4   4    6.30    0.89
 -11   4  -4    7.19    0.88
 -11  -4   4    4.16    1.07
  11   4   4    4.30    1.07
  11   5  -4   14.77    1.43
  11  -5   4   20.32    1.62
 -11  -5  -4   20.82    1.55
 -11   5   4   21.38    1.35
 -11   5  -4   19.89    1.46
 -11  -5   4   22.98    1.71
  11  -5  -4   19.12    1.56
  11   5   4   20.62    1.42
  11  -6   4    8.78    1.45
 -11  -6  -4    9.98    1.28
 -11   6   4    7.93    0.95
  11   6  -4    9.22    1.35
  11  -6  -4   10.10    1.26
  11   6   4    9.79    1.27
 -11  -6   4   10.08    1.50
  11   7  -4   14.21    1.63
  11  -7   4   11.59    1.76
 -11   7   4   13.89    1.27
  11   7   4   14.95    1.60
  11  -7  -4   13.02    1.70
 -11  -7   4    9.58    2.61
 -11   0   5    0.33    0.68
 -11   0  -5    0.31    0.59
  11   0  -5    0.32    0.66
  11  -1   5    2.05    0.68
  11   1  -5    2.74    0.74
 -11   1   5    2.19    0.78
 -11  -1  -5    2.30    0.67
 -11  -1   5    1.45    0.77
  11   1   5    2.56    0.69
 -11   1  -5    2.22    0.65
  11  -1  -5    3.00    0.71
  11  -2   5   11.49    1.03
 -11  -2  -5    9.09    0.91
  11   2  -5    9.37    0.99
 -11   2   5   10.13    0.98
  11   2   5   10.46    0.93
 -11  -2   5    9.69    1.13
  11  -2  -5   11.09    0.96
 -11   2  -5    9.42    0.92
 -11   3   5   26.04    1.40
  11  -3   5   27.33    1.65
 -11   3   5   26.51    1.52
 -11  -3  -5   26.00    1.49
  11   3  -5   25.23    1.62
  11   3   5   28.44    1.50
 -11   3  -5   26.15    1.49
  11  -3  -5   25.22    1.46
 -11  -3   5   27.11    1.84
  11   3   5   20.46    1.63
 -11  -4  -5   53.84    2.14
  11  -4   5   52.53    2.41
 -11   4   5   49.26    2.04
  11   4  -5   49.29    2.38
  11   4   5   48.83    2.33
 -11   4  -5   52.22    2.18
  11  -4  -5   52.51    2.19
 -11  -4   5   50.72    2.55
  11   4   5   48.11    2.24
 -11   5   5    5.67    0.84
  11  -5   5    4.41    1.13
 -11  -5  -5    6.48    0.96
  11   5  -5    6.07    1.14
  11  -5  -5    4.70    1.01
 -11   5  -5    6.56    1.01
  11   5   5    4.30    1.02
 -11  -5   5    6.07    1.31
  11   5   5    9.05    1.13
 -11   6   5   38.72    1.91
 -11  -6  -5   44.00    2.30
  11   6   5   43.52    2.23
  11  -6  -5   41.34    2.27
  11   0  -6   -0.39    0.69
  11   0   6   -0.03    0.62
 -11   0   6    0.04    0.76
 -11   0  -6    0.39    0.62
 -11  -1  -6    0.84    0.65
  11   1  -6    0.46    0.72
  11  -1   6    0.80    0.69
 -11   1   6    0.34    0.74
  11   1   6    0.76    0.66
 -11   1  -6    1.58    0.69
  11  -1  -6    0.77    0.68
 -11  -1   6    2.02    0.89
 -11  -2  -6    9.77    1.01
  11  -2   6   12.55    1.09
 -11   2   6   13.50    1.69
  11   2  -6   10.43    1.07
 -11   2  -6   11.40    1.02
  11  -2  -6   13.95    1.11
 -11  -2   6   11.42    1.22
  11   2   6   10.83    1.01
  11   3  -6   -0.83    0.84
 -11  -3  -6   -0.14    0.65
 -11   3   6   -0.20    0.62
 -11   3   6   -0.35    0.75
  11  -3   6    0.83    0.80
  11   3   6   -0.09    0.73
 -11   3  -6    0.29    0.72
 -11  -3   6    0.48    0.95
  11   4  -6    1.83    0.95
 -11   4   6    2.86    0.77
 -11  -4  -6    2.37    0.78
  11  -4   6    2.48    0.95
 -11  -4   6    1.97    1.10
 -11   4  -6    3.09    0.85
  11   4   6    3.13    0.93
  11  -4  -6    2.49    0.89
  11  -5   6   17.14    1.55
 -11   5   6   16.76    1.24
 -11  -5  -6   19.79    1.50
  11   5  -6   13.99    1.41
  11   5   6   15.89    1.44
  11  -5  -6   17.87    1.40
 -11   5  -6   19.07    1.37
 -11  -6  -6    0.36    0.98
  11   6  -6    0.85    1.23
 -11   6   6    0.20    0.85
  11  -6   6    0.11    1.24
  11  -6  -6   -0.77    1.07
 -11   6  -6   -0.09    1.26
 -11   0   7    0.13    0.81
 -11   0  -7   -0.35    0.65
  11   0  -7   -0.28    0.74
  11   0   7    0.16    0.71
 -11  -1  -7    4.11    0.80
  11   1  -7    3.48    0.85
 -11   1   7    4.07    0.92
  11  -1   7    2.58    0.81
  11  -1  -7    3.25    0.81
 -11   1  -7    3.42    0.79
  11   1   7    4.93    0.84
 -11  -1   7    3.84    1.00
 -11  -2  -7    5.82    0.90
  11   2  -7    6.48    0.99
  11  -2   7    7.04    0.99
 -11   2   7    8.23    1.08
  11   2   7    8.99    1.01
  11  -2  -7    6.10    0.93
 -11   2  -7    7.34    0.95
 -11  -2   7    7.58    1.17
  11  -3   7   38.56    2.02
 -11   3   7   34.69    1.73
  11   3  -7   38.33    2.01
 -11  -3  -7   37.31    1.91
  11   3   7   34.12    1.93
 -11   3  -7   36.48    1.85
  11  -4   7   15.38    1.39
  11   4  -7   13.78    1.34
 -11  -4  -7   16.50    1.24
 -11   4   7   18.23    1.26
  11   4   7   14.69    1.34
 -11   4  -7   16.06    1.27
  11  -5   7   21.34    1.77
  11   5  -7   14.90    1.60
 -11  -5  -7   18.06    1.37
 -11   5   7   20.27    1.49
 -11   5  -7   21.98    1.74
  11   5   7   20.16    1.62
 -11  -5   7   19.46    1.89
  11  -5  -7   21.27    1.49
 -11  -6  -7   15.30    1.48
  11  -6   7   17.22    1.76
 -11   6   7   19.10    1.42
  11   6  -7   16.56    1.73
  11  -6  -7   17.99    1.59
 -11  -6   7   19.96    2.09
 -11   6  -7   20.94    1.59
 -11   0  -8   -0.28    0.72
  11   0   8    0.27    0.75
  11   0  -8   -0.16    0.80
 -11   0   8   -0.09    0.97
 -11  -1  -8    5.92    0.92
  11  -1   8    7.11    0.99
  11   1  -8    6.42    0.98
 -11   1  -8    6.64    0.95
  11  -1  -8    6.28    0.97
  11   1   8    6.92    0.98
 -11  -2  -8   11.59    1.14
  11  -2   8   12.32    1.17
 -11   2   8   11.38    1.32
  11   2  -8    9.17    1.15
  11  -2  -8   13.00    1.22
 -11  -2   8    9.43    1.47
  11   2   8   13.51    1.22
 -11   2  -8   11.54    1.11
  11   3  -8   11.07    1.33
 -11   3   8   10.30    1.05
 -11  -3  -8    8.70    1.11
  11  -3   8   11.41    1.23
  11   3   8   10.58    1.21
 -11   3  -8    9.95    1.10
 -11  -3   8   10.77    1.57
  11   4  -8    0.83    1.04
 -11   4   8    1.32    0.85
 -11  -4  -8    0.14    0.82
  11  -4   8    1.41    1.00
  11   4   8    0.46    1.01
 -11  -4   8    0.52    1.32
 -11   4  -8    0.79    0.90
 -11   5   8    0.86    0.93
  11  -5   8    0.42    1.11
 -11  -5  -8    1.46    0.96
  11   5  -8    1.45    1.21
 -11   5  -8    0.95    1.02
 -11  -5   8    0.98    1.50
  11   5   8   -0.37    1.12
  11   0  -9    0.42    0.89
 -11   0  -9    0.32    0.79
  11   0   9    0.24    0.87
 -11   0   9   -0.10    1.05
 -11   1   9    0.80    1.09
  11  -1   9    1.14    0.85
 -11  -1  -9    1.10    0.84
  11   1  -9    0.21    0.89
  11  -1  -9    0.62    0.89
  11   1   9    0.54    0.81
 -11   1  -9    1.00    0.81
 -11  -1   9    1.15    1.16
 -11  -2  -9   23.08    1.70
  11   2  -9   25.11    1.80
 -11   2   9   25.63    1.99
  11  -2   9   28.34    1.83
  11  -2  -9   28.72    1.83
  11   2   9   25.52    1.85
 -11   2  -9   26.82    1.72
 -11  -2   9   28.38    2.24
 -11  -3  -9    3.20    0.96
  11   3  -9    4.21    1.19
  11  -3   9    3.77    1.10
 -11   3   9    4.00    0.93
 -11   3  -9    3.70    0.99
  11   3   9    3.53    1.10
 -11  -3   9    3.52    1.36
  11   4  -9   21.91    2.01
 -11   4   9   27.79    1.80
  11  -4   9   32.09    2.23
 -11  -4  -9   28.93    1.89
 -11  -4   9   25.71    2.17
 -11   4  -9   30.13    1.90
  11   4   9   30.27    2.25
  11   0  10    0.01    0.93
 -11   0 -10    0.53    0.88
 -11   0  10   -0.31    1.12
  11   0 -10   -0.42    0.94
  11   1 -10    0.62    0.99
 -11   1  10   -0.08    1.09
 -11  -1 -10    0.14    0.89
  11  -1  10    0.57    0.94
  11   1  10    0.33    0.93
  11  -1 -10    0.52    0.96
 -11   1 -10    0.25    0.87
 -11  -1  10    0.57    1.19
 -11   2  10    3.91    1.23
 -11  -2 -10    3.14    0.98
  11  -2  10    3.54    1.05
  11   2 -10    3.74    1.16
 -11   2 -10    4.46    1.04
  11   2  10    2.57    1.11
  11  -2 -10    2.33    1.08
 -11  -2  10    3.40    1.34
 -11  -3 -10    0.15    0.93
  11   3 -10   -0.22    1.65
  11  -3  10    0.45    1.11
  11  -3 -10    1.02    1.06
 -11  -3  10   -0.52    1.29
 -11   3 -10   -0.10    1.35
  11   3  10    0.62    1.16
 -11   4  10    3.74    1.06
  11  -4  10    3.86    1.25
  11   4  10    3.20    1.35
 -11  -4  10    2.87    1.51
 -11   0 -11    0.02    1.13
 -11   0  11   -0.48    1.24
  11  -1  11    3.15    1.18
 -11   1  11    2.74    1.34
  11   1 -11    3.87    1.52
 -11  -1  11    3.34    1.37
  11   1  11    3.13    1.42
 -11   1 -11    3.09    1.06
  11  -1 -11    2.07    1.24
  11  -2  11   11.26    1.43
  11   2 -11   11.35    1.48
  11   2  11   10.24    1.46
 -11   2 -11    9.87    1.27
 -11  -2  11   12.53    1.72
  11  -2 -11   12.00    1.42
  12   0   0   37.27    1.66
  12   0   0   39.03    1.53
 -12   0   0   38.55    1.71
 -12  -1   0    3.73    0.72
  12   1   0    4.01    0.76
  12  -1   0    3.27    0.66
  12  -1   0    2.91    0.67
 -12   1   0    2.47    0.63
  12  -2   0   -0.05    0.71
 -12   2   0   -0.13    0.55
  12  -2   0    0.20    0.58
 -12  -2   0   -0.08    0.63
 -12   3   0    0.29    0.60
 -12   3   0   -0.65    0.52
 -12  -3   0    0.20    0.73
  12   3   0    0.75    0.83
 -12   4   0    2.74    0.77
  12  -4   0    2.82    1.01
 -12  -4   0    3.70    0.94
 -12   4   0    2.17    0.65
  12   4   0    1.79    0.93
 -12   5   0    3.42    0.74
  12   5   0    2.69    1.10
  12  -5   0    3.20    1.13
 -12  -5   0    2.10    1.06
 -12  -6   0    3.90    1.31
 -12   6   0    1.88    0.80
  12   6   0    4.07    1.25
  12  -6   0    3.91    1.27
  12   0   1   40.08    1.70
 -12   0  -1   41.00    1.76
 -12   0   1   40.05    1.82
  12   0   1   40.58    1.62
  12   0  -1   40.13    1.73
  12   1  -1   63.95    2.40
  12  -1   1   62.83    2.31
 -12  -1  -1   64.83    2.39
  12  -1   1   59.18    2.22
 -12   1   1   66.67    2.40
  12  -1  -1   59.33    2.28
 -12  -1   1   64.98    2.47
  12  -1  -1   63.16    2.28
  12   1   1   63.21    2.37
 -12   1  -1   61.55    2.35
  12   1   1   64.23    2.19
 -12  -2  -1   26.62    1.51
  12  -2   1   26.50    1.31
 -12   2   1   26.92    1.45
  12   2  -1   27.18    1.55
  12  -2   1   29.67    1.55
  12  -2  -1   26.12    1.36
  12   2   1   24.67    1.50
 -12  -2   1   25.54    1.54
 -12   2  -1   27.43    1.40
  12  -2  -1   25.67    1.51
 -12  -3  -1   29.33    1.61
  12   3  -1   25.72    1.58
  12  -3   1   26.66    1.68
 -12   3   1   25.44    1.32
  12   3   1   23.80    1.57
 -12  -3   1   28.95    1.71
 -12   3  -1   26.32    1.45
  12  -3  -1   25.70    1.70
  12  -4   1    0.97    1.02
 -12   4   1    2.42    0.80
 -12   4   1    2.34    0.69
  12   4  -1    2.45    0.96
 -12  -4  -1    1.28    0.83
 -12  -4   1    1.06    0.93
  12   4   1    1.89    0.93
 -12   4  -1    0.30    0.72
  12  -4  -1    0.96    0.93
 -12   4  -1    1.88    0.72
  12  -5   1   11.69    1.43
 -12  -5  -1   11.98    1.32
 -12   5   1   15.57    1.09
  12   5  -1   10.69    1.33
  12   5   1   15.74    1.41
 -12   5  -1   14.26    1.02
 -12  -5   1   12.82    1.42
  12  -5  -1   12.77    1.32
 -12  -6  -1    5.19    1.29
 -12   6   1    4.72    0.88
  12   6  -1    7.94    1.36
  12  -6   1    8.42    1.46
 -12  -6   1    6.65    1.42
  12   6   1    9.56    1.38
  12  -6  -1    4.94    1.25
 -12   0  -2   19.82    1.27
  12   0   2   19.12    1.20
  12   0   2   19.74    1.18
 -12   0   2   21.29    1.35
  12   0  -2   20.05    1.33
  12  -1   2    6.81    0.76
  12  -1   2    8.22    0.82
  12   1  -2    8.40    0.94
 -12  -1  -2    7.25    0.82
 -12   1   2    7.88    0.87
  12   1   2    7.48    0.85
  12  -1  -2    7.38    0.89
 -12  -1   2    8.06    0.92
  12   1   2    7.59    0.72
 -12   1  -2    7.69    0.84
  12   2  -2    4.79    0.91
 -12  -2  -2    5.35    0.77
 -12   2   2    4.76    0.79
  12  -2   2    4.94    0.69
  12  -2   2    4.23    0.85
  12  -2  -2    5.19    0.76
  12   2   2    5.41    0.69
 -12  -2   2    3.79    0.84
 -12   2  -2    4.47    0.74
  12  -2  -2    5.59    0.88
  12   2   2    4.96    0.84
 -12   3   2   -0.01    0.76
  12  -3   2    0.61    0.63
  12   3  -2    0.13    0.80
  12  -3   2    0.32    0.80
 -12  -3  -2    0.51    0.67
 -12   3   2   -0.05    0.56
  12   3   2   -0.62    1.33
 -12   3  -2   -0.41    0.63
 -12  -3   2   -0.07    0.82
  12  -3  -2   -0.05    0.80
  12   4  -2   32.77    1.96
 -12   4   2   36.27    1.71
 -12   4   2   36.25    1.62
  12  -4   2   35.01    2.05
 -12  -4  -2   34.91    1.86
 -12  -4   2   31.67    2.09
  12   4   2   34.94    1.89
 -12   4  -2   33.10    1.74
  12  -4  -2   36.24    1.95
 -12  -5  -2   10.57    1.21
 -12   5   2   10.28    0.96
  12  -5   2   11.37    1.46
  12   5  -2    9.51    1.29
 -12  -5   2   10.64    1.36
 -12   5  -2   12.95    1.13
  12   5   2    9.87    1.26
  12  -5  -2   10.38    1.22
 -12   6   2    0.90    0.83
  12  -6   2    0.34    1.30
 -12  -6  -2    1.65    1.17
  12   6  -2    1.16    1.24
 -12  -6   2    1.54    1.32
  12   6   2    1.89    1.18
  12  -6  -2    1.46    1.09
 -12   0  -3   18.74    1.24
  12   0  -3   17.04    1.18
  12   0   3   16.25    1.17
 -12   0   3   14.80    1.17
  12   0   3   15.97    1.16
 -12   1   3   65.07    2.46
  12  -1   3   63.07    2.35
 -12  -1  -3   61.93    2.37
  12   1  -3   65.57    2.45
  12   1   3   57.80    2.27
 -12   1  -3   63.32    2.39
  12   1   3   64.05    2.28
 -12  -1   3   57.35    2.51
  12  -1  -3   59.58    2.34
  12   2  -3   23.75    1.50
 -12  -2  -3   20.03    1.32
 -12   2   3   21.62    1.40
  12  -2   3   19.77    1.40
 -12   2  -3   20.49    1.36
  12  -2  -3   19.36    1.32
  12  -2  -3   18.96    1.41
  12   2   3   20.60    1.25
 -12  -2   3   19.95    1.57
  12   2   3   18.22    1.34
 -12   3   3   27.14    1.43
 -12  -3  -3   29.51    1.57
  12   3  -3   28.08    1.66
  12  -3   3   30.35    1.74
 -12   3  -3   27.38    1.61
  12  -3  -3   30.34    1.66
 -12  -3   3   25.63    1.87
  12   3   3   31.34    1.61
  12   3   3   28.81    1.67
  12  -4   3    7.41    1.13
 -12  -4  -3    7.98    0.98
  12   4  -3    8.39    1.15
 -12   4   3    8.00    0.87
 -12   4  -3    6.66    0.97
 -12  -4   3    8.68    1.24
  12  -4  -3    7.86    1.04
  12   4   3    6.88    1.06
  12   5  -3    6.80    1.22
 -12   5   3    7.68    0.93
 -12  -5  -3    7.37    1.14
  12  -5   3    8.28    1.35
 -12  -5   3    6.28    1.31
  12  -5  -3    6.15    1.09
  12   5   3    8.39    1.22
 -12   5  -3    9.32    1.10
 -12  -6  -3    0.50    1.10
 -12   6   3    0.52    0.82
  12  -6   3    1.28    1.41
 -12  -6   3    0.71    1.33
  12  -6  -3   -0.23    1.08
  12   6   3    0.95    1.21
  12   0   4   33.37    1.56
 -12   0  -4   30.53    1.62
 -12   0   4   31.09    1.73
  12   0  -4   30.13    1.58
  12  -1   4   33.32    1.63
  12   1  -4   32.89    1.68
 -12   1   4   30.88    1.69
  12  -1  -4   33.34    1.64
  12   1   4   36.25    1.62
 -12  -1   4   30.86    1.84
 -12   1  -4   31.82    1.67
  12   2  -4   34.21    1.74
 -12  -2  -4   33.84    1.68
 -12   2   4   34.35    1.73
  12  -2   4   35.13    1.74
  12   2   4   34.78    1.85
 -12   2  -4   34.82    1.72
 -12  -2   4   28.07    1.90
  12  -2  -4   33.32    1.70
  12   2   4   35.20    1.65
 -12   3   4   21.68    1.31
 -12  -3  -4   25.00    1.52
  12   3  -4   23.31    1.61
  12  -3   4   22.90    1.63
 -12  -3   4   22.40    1.78
  12  -3  -4   24.39    1.50
  12   3   4   25.42    1.57
  12   3   4   24.25    1.47
 -12   3  -4   23.13    1.53
 -12  -4  -4    4.22    0.87
  12   4  -4    4.10    1.04
  12  -4   4    4.42    1.05
 -12   4   4    6.05    0.86
 -12  -4   4    3.49    1.18
 -12   4  -4    5.41    0.92
  12   4   4    4.93    1.04
  12  -4  -4    4.35    0.96
 -12  -5  -4    1.43    0.91
 -12   5   4    1.54    0.79
  12   5  -4    0.81    1.08
  12  -5   4    1.81    1.10
  12   5   4    2.38    1.09
  12  -5  -4    1.36    1.01
 -12  -5   4    1.45    1.21
 -12   5  -4    1.38    0.95
  12  -6   4    1.62    1.46
  12   6  -4    3.07    1.34
 -12  -6  -4    1.26    1.15
 -12   6   4    1.94    0.96
 -12  -6   4    2.13    1.46
  12  -6  -4    0.77    1.15
  12   6   4    1.90    1.24
 -12   0   5    9.91    1.12
 -12   0  -5   13.35    1.11
  12   0   5   11.74    1.00
  12   0  -5   12.94    1.11
 -12  -1  -5   26.09    1.53
  12   1  -5   24.94    1.58
 -12   1   5   22.83    1.57
  12  -1   5   25.92    1.51
 -12  -1   5   23.26    1.72
 -12   1  -5   26.65    1.52
  12  -1  -5   24.78    1.45
  12   1   5   23.90    1.42
  12  -2   5   10.74    1.06
 -12  -2  -5   11.28    1.05
 -12   2   5    8.86    1.04
  12   2  -5   10.45    1.12
 -12   2  -5    7.87    0.96
  12  -2  -5   10.93    1.03
 -12  -2   5    8.40    1.18
  12   2   5    9.62    0.97
 -12  -3  -5   24.92    1.54
  12   3  -5   24.74    1.68
 -12   3   5   24.27    1.41
  12  -3   5   27.00    1.71
 -12   3   5   22.41    1.60
 -12  -3   5   26.44    2.04
  12   3   5   24.63    1.57
 -12   3  -5   24.46    1.58
  12   4  -5   31.57    2.00
 -12   4   5   33.31    1.69
 -12  -4  -5   33.54    1.80
  12  -4   5   33.26    2.07
  12  -4  -5   35.38    1.88
 -12   4  -5   32.81    1.80
  12   4   5   31.71    1.90
 -12  -4   5   33.54    2.33
 -12  -5  -5    5.64    1.08
  12   5  -5    7.41    1.26
 -12   5   5    5.45    0.94
  12  -5   5    6.44    1.28
 -12  -5   5    6.39    1.41
 -12   5  -5    5.61    1.06
  12  -5  -5    6.14    1.17
 -12   6   5    5.48    1.03
  12   6  -5    4.47    1.42
  12  -6   5    5.32    1.44
 -12  -6  -5    6.15    1.29
 -12  -6   5    2.61    1.62
  12  -6  -5    5.38    1.29
  12   0  -6   61.40    2.54
  12   0   6   66.85    2.55
 -12   0   6   60.65    2.68
 -12   0  -6   61.24    2.52
  12   1  -6    3.20    0.88
 -12  -1  -6    3.18    0.83
 -12   1   6    3.54    0.94
  12  -1   6    2.91    0.82
  12   1   6    3.16    0.78
  12  -1  -6    3.71    0.86
 -12   1  -6    2.98    0.81
 -12  -1   6    2.78    0.98
  12   2  -6    6.81    1.04
 -12  -2  -6    5.89    0.96
  12  -2   6    5.81    0.95
 -12   2   6    5.83    1.04
 -12   2  -6    5.07    0.90
  12  -2  -6    5.75    0.92
  12   2   6    4.37    0.87
 -12  -2   6    5.51    1.15
 -12   3   6    3.49    0.97
 -12   3   6    3.67    0.83
 -12  -3  -6    4.04    0.86
  12   3  -6    4.71    1.09
  12  -3   6    3.04    0.93
  12   3   6    4.10    0.93
 -12  -3   6    3.23    1.17
 -12   3  -6    4.78    0.93
 -12  -4  -6   29.31    1.73
  12   4  -6   20.14    1.61
  12  -4   6   29.88    1.97
 -12   4   6   28.72    1.59
  12   4   6   28.88    1.87
 -12  -4   6   23.27    1.87
 -12   4  -6   27.80    1.76
 -12   5   6    2.99    1.08
 -12  -5  -6    1.72    0.90
  12   5  -6    1.51    1.61
  12  -5  -6    1.07    1.46
  12   5   6    2.28    1.53
 -12   5  -6    2.29    1.04
 -12   0  -7   27.38    1.70
  12   0   7   29.10    1.71
  12   0  -7   27.06    1.71
 -12   0   7   28.83    1.96
  12  -1   7    2.23    0.83
 -12   1   7    2.29    0.96
  12   1  -7    1.55    0.89
 -12  -1  -7    2.28    0.85
  12  -1  -7    2.02    0.87
 -12  -1   7    1.85    1.04
 -12   1  -7    2.95    0.84
  12   1   7    2.24    0.83
 -12  -2  -7    1.84    0.87
  12  -2   7    1.60    0.88
  12   2  -7    1.98    0.89
 -12   2   7    2.05    0.99
  12   2   7    2.23    0.84
 -12   2  -7    2.64    0.90
 -12  -2   7    1.95    1.11
  12  -2  -7    0.49    0.85
  12  -3   7   11.60    1.24
 -12  -3  -7   10.63    1.15
 -12   3   7   12.78    1.16
  12   3  -7   12.05    1.35
  12   3   7   10.63    1.20
 -12  -3   7   12.83    1.57
 -12   3  -7   14.12    1.23
 -12   4   7    3.12    0.93
 -12  -4  -7    4.36    0.97
  12   4  -7    4.22    1.19
  12  -4   7    4.86    1.14
  12   4   7    3.37    1.10
 -12   4  -7    4.94    1.06
 -12  -4   7    1.85    1.42
 -12  -5  -7    1.67    0.99
 -12   5   7    3.12    0.98
  12   5  -7    1.28    1.25
  12  -5   7    2.59    1.20
  12   5   7    1.75    1.19
 -12  -5   7    3.03    1.69
 -12   5  -7    1.54    1.11
 -12   0  -8   38.59    2.02
  12   0  -8   40.86    2.07
  12   0   8   38.94    2.06
 -12  -1  -8   47.85    2.27
  12   1  -8   44.52    2.30
  12  -1   8   50.23    2.25
  12   1   8   49.83    2.27
  12  -1  -8   46.90    2.25
 -12   1  -8   47.41    2.26
  12   2  -8   45.74    2.36
  12  -2   8   50.03    2.33
 -12  -2  -8   44.54    2.26
 -12   2  -8   45.18    2.22
  12   2   8   43.79    2.27
  12  -2  -8   47.56    2.27
 -12  -3  -8   11.81    1.26
  12   3  -8   12.07    1.38
  12  -3   8   13.07    1.35
 -12  -3   8   14.04    1.83
  12   3   8   13.25    1.37
  12  -3  -8   13.39    1.31
 -12   3  -8   13.32    1.27
  12   4  -8    2.42    1.16
 -12   4   8    2.23    0.89
  12  -4   8    2.45    1.24
 -12  -4   8    2.56    1.52
 -12   4  -8    2.16    1.02
  12   4   8    1.97    1.14
  12   0   9   15.50    1.41
  12   0  -9   15.71    1.40
 -12   0  -9   16.15    1.38
 -12   0   9   16.97    1.76
  12  -1   9    6.82    1.14
  12   1  -9    4.36    1.12
 -12  -1  -9    5.68    1.04
 -12   1   9    5.36    1.32
  12  -1  -9    4.82    1.11
 -12  -1   9    5.59    1.49
 -12   1  -9    4.57    1.05
  12   1   9    4.79    1.02
 -12   2   9   12.29    1.54
 -12  -2  -9    7.66    1.17
  12   2  -9    8.18    1.27
  12  -2   9   10.81    1.27
 -12   2  -9    8.76    1.15
  12  -2  -9    9.42    1.25
 -12  -2   9    9.91    1.66
  12   2   9    9.70    1.27
  12  -3   9    1.73    1.45
  12   3  -9    0.50    1.15
 -12  -3  -9    0.65    1.01
  12  -3  -9    1.87    1.09
  12   3   9    0.82    1.11
 -12  -3   9   -0.38    1.37
  12  -4   9   -0.36    1.17
 -12  -4  -9    0.27    1.09
 -12   4   9    0.30    0.95
 -12  -4   9    0.91    1.62
 -12   0  10   56.91    2.87
 -12   0 -10   55.78    3.71
  12   0  10   54.80    2.70
  12   0 -10   53.96    3.25
  12   1 -10    7.06    1.44
 -12   1  10    8.66    1.45
  12   1  10    9.13    1.28
 -12  -1  10   10.60    1.66
 -12   1 -10    7.34    1.19
  12  -1 -10   10.81    1.41
  12   2 -10   17.62    1.64
  12  -2  10   19.25    1.57
 -12  -2 -10   18.84    2.54
  12  -2 -10   22.67    1.67
 -12  -2  10   19.04    1.98
 -12   2 -10   19.27    1.57
  12  -3  10    0.99    1.15
 -12  -3  10    0.51    1.48
  12   3  10    1.18    1.26
  12   0  11   18.19    1.63
  12   0 -11   17.67    1.63
 -12   0 -11   17.06    1.58
 -12   1  11    3.14    1.46
 -12  -1  11    4.20    1.52
  13   0   0    0.24    0.76
 -13   0   0    0.32    0.66
 -13  -1   0    4.55    0.84
  13  -1   0    3.99    0.75
  13  -1   0    4.37    0.77
  13   1   0    4.78    0.85
 -13   1   0    4.01    0.75
  13  -2   0    1.90    0.80
  13   2   0    0.88    0.83
 -13  -2   0    0.79    0.75
 -13   2   0    1.75    0.66
  13   3   0   12.01    1.21
  13  -3   0   15.75    1.32
 -13   3   0   15.37    1.11
  13  -3   0   15.39    1.12
 -13  -3   0   14.64    1.31
 -13   4   0   13.86    1.10
  13  -4   0   15.14    1.48
 -13  -4   0   12.57    1.32
 -13   4   0   14.20    1.05
  13   4   0   14.40    1.36
 -13  -5   0   60.81    2.96
 -13   5   0   64.82    2.42
  13   5   0   59.70    2.81
  13  -5   0   62.70    3.00
  13  -6   0   -0.03    1.44
 -13  -6   0   -0.22    1.34
  13   0   1    0.02    0.72
 -13   0   1   -0.12    0.65
 -13   0  -1   -0.15    0.62
  13   0   1    0.48    0.58
  13   0  -1   -0.02    0.73
 -13  -1  -1    3.98    0.77
  13   1  -1    4.36    0.87
  13  -1   1    5.40    0.80
 -13   1   1    4.98    0.84
  13  -1   1    4.95    0.77
 -13  -1   1    4.34    0.86
  13  -1  -1    3.58    0.77
 -13   1  -1    5.30    0.80
  13   1   1    4.48    0.86
  13   2  -1    0.26    0.84
  13  -2   1   -0.36    0.68
 -13   2   1    0.56    0.67
 -13  -2  -1    0.84    0.72
  13  -2  -1    0.82    0.80
  13  -2  -1    0.95    0.70
 -13  -2   1   -0.02    0.75
 -13   2  -1    0.56    0.65
  13   2   1   -0.03    0.84
  13   3  -1   36.47    2.00
 -13  -3  -1   39.10    2.01
  13  -3   1   40.06    1.92
 -13   3   1   39.80    1.82
  13  -3   1   35.35    1.97
  13   3   1   34.34    1.92
 -13   3  -1   35.76    1.80
 -13  -3   1   36.22    2.06
  13  -3  -1   37.63    2.06
  13  -3  -1   38.49    1.81
 -13  -4  -1    7.14    1.15
 -13   4   1    9.65    1.04
 -13   4   1    9.52    0.94
  13  -4   1    9.14    1.28
  13   4  -1    9.29    1.23
 -13   4  -1    9.69    1.00
 -13  -4   1    8.41    1.24
  13   4   1    8.09    1.20
  13  -4  -1    7.85    1.27
  13  -5   1    2.03    1.30
 -13   5   1    3.81    0.87
 -13  -5  -1    3.39    1.16
  13   5  -1    3.45    1.24
 -13  -5   1    2.94    1.28
  13   5   1    3.68    1.26
  13  -5  -1    3.19    1.24
 -13  -6  -1    3.06    1.38
 -13   6   1    2.11    0.93
  13   6  -1    2.71    1.36
  13  -6  -1    2.74    1.39
 -13  -6   1    2.40    1.45
  13   6   1    4.11    1.41
  13   0   2   -0.12    0.62
 -13   0  -2   -0.20    0.63
 -13   0   2    0.09    0.70
  13   0   2   -0.08    0.73
  13   0  -2   -0.34    0.73
  13  -1   2    3.20    0.74
  13  -1   2    3.37    0.77
 -13   1   2    3.48    0.79
 -13  -1  -2    3.24    0.74
  13   1  -2    3.43    0.87
  13   1   2    3.46    0.74
 -13   1  -2    2.81    0.75
  13  -1  -2    4.00    0.81
  13   1   2    3.74    0.83
 -13  -1   2    3.78    0.91
  13   2  -2    4.62    0.99
 -13   2   2    5.90    0.87
 -13  -2  -2    3.94    0.81
  13  -2   2    7.59    0.95
 -13  -2   2    5.25    1.01
  13   2   2    5.77    1.12
  13  -2  -2    4.36    0.83
 -13   2  -2    5.42    0.85
  13  -3   2    4.41    0.99
 -13   3   2    4.24    0.85
 -13  -3  -2    3.01    0.85
  13   3  -2    3.03    0.94
  13  -3  -2    3.06    1.26
  13  -3  -2    5.34    0.92
  13   3   2    4.94    1.04
 -13   3  -2    5.32    0.88
 -13  -3   2    3.25    1.05
  13   4  -2    7.37    1.20
 -13   4   2    7.57    0.93
  13  -4   2    8.50    1.26
 -13  -4  -2    7.43    1.11
 -13  -4   2    7.15    1.31
 -13   4  -2    8.04    1.01
  13  -4  -2    8.62    1.24
  13   4   2    9.68    1.21
  13  -5   2   11.75    1.52
 -13   5   2   10.64    1.08
  13   5  -2   11.72    1.47
 -13  -5  -2   12.88    1.42
  13  -5  -2   11.39    1.41
  13   5   2   15.81    1.49
 -13  -5   2   10.07    1.49
 -13   6   2    7.35    1.06
  13  -6   2    6.13    1.69
  13   6  -2    5.79    1.47
 -13  -6  -2    8.14    1.46
  13  -6  -2    7.77    1.49
  13   6   2    7.22    1.47
  13   0  -3    0.24    0.75
  13   0   3   -0.19    0.64
 -13   0  -3   -0.18    0.65
 -13   0   3   -0.11    0.77
  13  -1   3    0.79    0.69
 -13   1   3    0.00    0.73
  13   1  -3   -0.37    0.80
 -13  -1  -3    0.13    0.66
  13   1   3    0.42    0.65
 -13  -1   3    0.17    0.80
 -13   1  -3    0.10    0.68
  13   1   3    0.00    0.99
  13  -1  -3    0.67    0.75
 -13   2   3    3.42    0.85
 -13  -2  -3    4.13    0.84
  13  -2   3    4.20    0.90
  13   2  -3    2.28    0.89
  13   2   3    4.40    0.95
 -13  -2   3    4.54    1.04
 -13   2  -3    3.79    0.84
  13  -2  -3    3.57    0.83
 -13   3   3    4.43    0.91
 -13  -3  -3    4.48    0.89
  13  -3   3    3.67    1.00
  13   3  -3    3.45    0.96
 -13   3  -3    4.83    0.90
 -13  -3   3    4.15    1.13
  13  -3  -3    6.05    0.96
  13   3   3    3.40    1.01
 -13  -4  -3   17.14    1.37
  13  -4   3   17.42    1.51
  13   4  -3   15.58    1.42
 -13   4   3   16.52    1.21
  13   4   3   16.61    1.43
 -13  -4   3   15.86    1.58
  13  -4  -3   18.50    1.46
 -13   4  -3   16.78    1.29
  13  -5   3   33.91    2.32
 -13  -5  -3   33.36    2.15
 -13   5   3   33.20    1.80
  13   5  -3   29.12    2.24
 -13  -5   3   31.07    2.43
 -13   5  -3   30.99    1.97
  13  -5  -3   28.72    2.19
  13   5   3   34.29    2.16
 -13  -6  -3    6.60    1.44
  13  -6   3    6.55    1.55
  13   6  -3    5.53    1.45
  13  -6  -3    7.93    1.46
  13   6   3    8.49    1.46
 -13  -6   3    7.73    1.64
 -13   0   4   -0.19    0.80
  13   0   4    0.63    0.69
  13   0  -4   -0.18    0.77
 -13   0  -4    0.02    0.70
 -13  -1  -4    1.36    0.74
  13  -1   4    0.58    0.71
  13   1  -4    0.89    0.87
 -13   1   4    0.50    0.76
 -13  -1   4    1.20    0.92
  13   1   4    0.78    0.78
 -13   1  -4    1.36    0.77
  13  -1  -4    1.49    0.82
 -13   2   4    5.62    0.95
  13   2  -4    4.92    1.01
 -13  -2  -4    5.29    0.90
  13  -2   4    6.21    0.95
 -13   2  -4    6.02    0.96
 -13  -2   4    5.43    1.13
  13  -2  -4    4.85    0.92
 -13   3   4   11.92    1.16
  13  -3   4   11.31    1.19
  13   3  -4    9.27    1.22
 -13  -3  -4   14.42    1.19
 -13  -3   4   10.50    1.35
  13  -3  -4   10.27    1.12
 -13   3  -4   11.21    1.17
 -13  -4  -4    6.15    1.04
  13  -4   4    8.11    1.26
 -13   4   4    6.81    0.94
  13   4  -4    6.18    1.25
 -13   4  -4    7.07    1.10
 -13  -4   4    5.15    1.35
 -13   5   4   24.06    1.66
  13  -5   4   21.87    1.80
 -13  -5  -4   28.54    1.96
  13  -5  -4   22.83    1.69
 -13  -5   4   18.34    1.99
  13   5   4   22.11    1.81
 -13   5  -4   27.52    1.97
 -13   0   5   -0.19    0.88
  13   0   5    0.09    0.74
  13   0  -5    0.07    0.79
 -13   0  -5    0.12    0.79
  13   1  -5    1.12    0.88
  13  -1   5    1.73    0.80
 -13  -1  -5    1.02    0.78
 -13   1   5    1.18    0.87
 -13  -1   5    1.14    0.97
  13  -1  -5    0.55    0.84
  13   1   5    1.42    0.74
 -13   1  -5    2.09    0.86
  13  -2   5    3.89    0.91
  13   2  -5    3.29    1.00
 -13   2   5    3.11    0.92
 -13  -2  -5    3.54    0.89
  13   2   5    5.15    0.89
 -13  -2   5    3.22    1.12
 -13   2  -5    3.90    0.92
  13  -2  -5    2.77    0.91
 -13   3   5    7.29    1.10
  13  -3   5    7.29    1.11
  13   3  -5    5.92    1.10
 -13  -3  -5    5.85    0.98
  13   3   5    8.10    1.05
  13  -3  -5    7.02    1.07
 -13  -3   5    5.39    1.28
 -13   3  -5    6.95    1.06
  13   4  -5    1.79    1.11
 -13  -4  -5    3.18    0.91
  13  -4   5    3.17    1.11
 -13   4   5    2.70    0.85
 -13   4  -5    2.43    1.01
 -13  -4   5    2.94    1.30
  13  -5   5    5.25    1.69
 -13  -5  -5    7.87    1.23
  13   5  -5   10.05    1.49
 -13  -5   5    7.37    1.56
 -13   5  -5    9.21    1.30
  13   0   6    0.20    0.79
 -13   0   6    0.25    1.00
  13   0  -6   -0.49    0.82
 -13   0  -6    0.39    0.83
 -13   1   6    2.11    1.02
  13   1  -6    2.46    0.97
 -13  -1  -6    2.88    0.90
  13  -1   6    2.57    0.86
  13  -1  -6    2.14    0.94
 -13  -1   6    3.81    1.16
  13   1   6    3.92    0.88
 -13   1  -6    2.85    0.91
  13  -2   6   10.37    1.14
 -13   2   6   12.41    1.34
  13   2  -6   12.03    1.24
 -13  -2  -6   12.41    1.20
 -13  -2   6   10.98    1.43
  13  -2  -6   10.96    1.17
  13   2   6   13.49    1.17
 -13   2  -6   11.35    1.21
  13  -3   6    8.29    1.19
  13   3  -6    7.05    1.21
 -13  -3  -6    7.02    1.03
  13  -3  -6    8.39    1.17
 -13  -3   6    6.71    1.41
  13   3   6    7.28    1.10
 -13   3  -6    6.77    1.10
  13  -4   6   13.69    1.44
 -13   4   6   13.59    1.24
 -13  -4  -6   12.76    1.26
 -13   4  -6   14.55    1.37
 -13  -5  -6    0.35    1.05
 -13   5   6   -1.20    0.90
  13  -5   6    0.28    1.18
  13   5  -6   -0.81    1.30
 -13   5  -6   -0.70    1.11
 -13  -5   6    0.79    1.58
  13   0   7    0.05    0.85
  13   0  -7   -0.62    0.89
 -13   0  -7    0.00    0.86
 -13   0   7   -0.27    1.04
 -13  -1  -7    3.43    1.01
  13   1  -7    3.40    1.05
 -13   1   7    3.67    1.12
  13  -1   7    4.35    0.95
  13  -1  -7    5.15    1.07
 -13  -1   7    3.84    1.23
 -13   1  -7    3.48    0.99
  13   1   7    3.31    0.92
  13   2  -7   21.53    1.62
  13  -2   7   21.96    1.73
 -13  -2  -7   18.54    1.47
 -13   2   7   20.30    1.64
 -13   2  -7   21.92    1.70
  13   2   7   17.47    1.42
 -13  -2   7   19.70    1.77
  13  -2  -7   21.71    1.53
  13  -3   7    7.84    1.21
 -13  -3  -7    5.39    1.07
  13   3  -7    6.29    1.24
 -13   3  -7    6.61    1.14
  13   3   7    6.93    1.17
 -13  -3   7    6.69    1.54
  13  -3  -7    6.61    1.22
  13  -4   7   18.53    1.66
  13   4  -7   19.99    1.74
 -13   4   7   23.55    1.78
 -13  -4  -7   24.81    1.79
  13   4   7   24.36    2.00
 -13   4  -7   25.51    1.96
 -13   0  -8   -0.10    0.95
  13   0  -8   -0.22    0.99
  13   0   8   -0.39    0.93
 -13   0   8   -0.03    1.22
  13   1  -8   10.81    1.34
 -13   1   8    6.42    1.39
  13  -1   8   12.69    1.26
 -13  -1  -8   10.40    1.24
  13  -1  -8   12.42    1.33
 -13  -1   8    5.83    1.46
 -13   1  -8   13.37    1.29
  13   1   8   11.20    1.20
 -13   2   8    3.01    1.29
 -13  -2  -8    4.65    1.14
  13  -2   8    3.99    1.10
  13  -2  -8    6.98    1.57
 -13  -2   8    3.17    1.47
 -13   2  -8    4.31    1.10
  13   2   8    4.94    1.11
  13  -3   8    1.33    1.45
 -13  -3  -8    0.70    1.08
  13   3  -8    1.67    1.20
 -13  -3   8    0.04    1.64
  13  -3  -8    1.38    1.14
  13   3   8    1.24    1.09
 -13   0   9   -0.01    1.47
  13   0  -9   -0.09    1.07
  13   0   9    0.81    1.00
 -13   0  -9   -0.09    1.04
  13  -1   9    4.69    1.27
 -13   1   9    5.08    1.52
 -13  -1  -9    3.59    1.25
  13   1  -9    2.41    1.20
  13   1   9    3.38    1.08
  13  -1  -9    4.51    1.24
 -13  -1   9    2.13    1.69
 -13   1  -9    4.06    1.12
  13  -2   9    0.95    1.06
  13   2  -9    0.86    1.22
 -13  -2  -9   -0.20    1.08
 -13   2   9   -0.14    1.54
  13   2   9    0.16    1.05
 -13   2  -9   -0.14    1.07
 -13  -2   9    0.76    1.63
  13  -2  -9    0.92    1.13
  13   0 -10   -0.71    1.16
  13   0  10    0.51    1.12
 -13   0 -10    0.70    1.10
 -13   1  10    6.46    1.57
  13  -1  10    8.15    1.35
 -13  -1  10    7.53    1.76
  13   1  10    7.24    1.33
  14   0   0   50.05    2.18
 -14   0   0   50.63    2.23
 -14  -1   0   71.30    2.81
  14   1   0   71.90    2.72
 -14   1   0   69.29    2.73
  14  -1   0   66.60    2.60
  14   2   0    2.82    0.97
  14  -2   0    2.58    0.85
  14  -2   0    2.25    1.13
 -14   2   0    3.38    0.84
 -14  -2   0    3.72    0.97
 -14   3   0   19.41    1.48
  14  -3   0   20.44    1.49
  14  -3   0   17.56    1.27
 -14  -3   0   19.09    1.51
  14   3   0   18.96    1.47
 -14  -4   0    0.33    1.06
  14  -4   0    2.21    1.00
  14   4   0    0.04    1.16
  14  -4   0   -0.43    1.17
 -14   4   0    0.33    0.87
  14   5   0    0.73    1.32
 -14  -5   0    0.71    1.39
  14  -5   0    0.11    1.38
  14   0  -1   15.74    1.22
 -14   0   1   16.27    1.28
 -14   0  -1   17.18    1.37
  14   0   1   16.98    1.31
 -14   1   1   15.51    1.22
  14   1  -1   15.78    1.26
 -14  -1  -1   16.35    1.26
  14  -1   1   13.89    1.59
  14  -1  -1   14.51    1.16
 -14   1  -1   14.02    1.15
 -14  -1   1   16.93    1.36
  14   1   1   16.55    1.25
  14  -2   1    2.49    0.88
 -14  -2  -1    0.83    0.85
 -14   2   1    1.70    0.81
  14  -2   1    1.56    0.83
  14   2  -1    1.41    0.93
  14  -2  -1    0.77    0.82
 -14   2  -1    1.96    0.78
  14   2   1    0.35    0.95
 -14  -2   1    1.35    0.91
 -14  -3  -1   12.34    1.29
 -14   3   1   14.15    1.20
  14   3  -1   14.71    1.39
  14  -3   1   15.77    1.37
 -14  -3   1   14.38    1.43
 -14   3  -1   12.71    1.14
  14  -3  -1   13.09    1.17
  14   3   1   13.84    1.33
  14  -3  -1   14.73    1.41
  14  -4   1    1.58    1.19
 -14  -4  -1    1.01    1.05
 -14   4   1    2.01    1.10
  14   4  -1    0.97    1.12
 -14  -4   1    2.17    1.20
  14   4   1    1.18    1.22
  14  -4  -1    0.97    1.24
 -14   4  -1    0.42    0.86
 -14  -5  -1    5.21    1.33
  14   5  -1    5.54    1.41
  14  -5   1    6.07    1.48
 -14   5   1    6.69    1.05
  14  -5  -1    6.95    1.57
  14   5   1    6.43    1.45
 -14   0  -2    8.43    0.99
  14   0  -2   10.60    1.08
 -14   0   2   10.23    1.13
  14   1  -2   28.25    1.69
 -14   1   2   28.63    1.73
 -14  -1  -2   29.87    1.69
  14  -1   2   30.49    1.64
 -14   1  -2   28.31    1.67
 -14  -1   2   28.64    1.91
  14  -1  -2   31.22    1.70
  14   2  -2   10.32    1.18
 -14  -2  -2   10.07    1.11
 -14   2   2   11.78    1.11
  14  -2   2   11.53    1.14
 -14   2  -2   10.82    1.10
  14  -2  -2   11.80    1.12
 -14  -2   2   10.33    1.28
  14   2   2   10.85    1.21
  14  -3   2   12.06    1.30
  14   3  -2   11.41    1.34
 -14   3   2   13.77    1.19
 -14  -3  -2   11.40    1.23
 -14   3  -2   11.67    1.14
  14  -3  -2   12.73    1.20
 -14  -3   2   14.02    1.46
  14   3   2   11.93    1.31
 -14   4   2    9.49    1.06
  14   4  -2    7.26    1.34
  14  -4   2    6.61    1.31
 -14  -4  -2    9.19    1.28
 -14  -4   2    6.44    1.40
  14   4   2    7.54    1.32
 -14   4  -2    9.05    1.11
  14  -4  -2    7.13    1.47
  14  -5   2    3.10    1.37
 -14  -5  -2    3.38    1.30
  14   5  -2    6.14    1.95
 -14   5   2    3.03    1.00
 -14  -5   2    2.82    1.48
  14   5   2    3.16    1.37
  14  -5  -2    3.03    1.45
 -14   0  -3    5.59    0.94
  14   0  -3    4.60    0.98
 -14   0   3    6.02    1.06
  14   0   3    7.06    0.90
 -14  -1  -3   21.45    1.54
  14   1  -3   20.33    1.44
  14  -1   3   24.67    1.55
 -14   1   3   22.25    1.72
  14  -1  -3   21.05    1.58
 -14   1  -3   24.59    1.61
 -14  -1   3   18.94    1.55
  14  -2   3   14.97    1.22
 -14  -2  -3   15.87    1.26
  14   2  -3   13.49    1.33
 -14   2   3   12.85    1.27
  14  -2  -3   14.70    1.23
 -14  -2   3   15.29    1.48
 -14   2  -3   14.79    1.26
 -14   3   3    9.23    1.15
  14  -3   3    9.02    1.20
 -14  -3  -3    8.92    1.14
  14   3  -3   10.07    1.31
 -14  -3   3    8.16    1.37
 -14   3  -3   10.35    1.13
  14  -3  -3    8.84    1.15
 -14  -4  -3    5.44    1.15
  14   4  -3    6.69    1.31
  14  -4   3    5.79    1.28
 -14   4   3    4.79    0.97
  14   4   3    8.15    1.44
 -14   4  -3    7.94    1.11
 -14  -4   3    6.67    1.43
  14   5  -3   20.52    1.82
 -14   5   3   20.59    1.48
 -14  -5   3   18.09    1.93
  14   5   3   19.75    1.73
 -14   0   4    3.79    1.05
  14   0   4    4.77    0.90
  14   0  -4    3.88    0.98
 -14   0  -4    3.28    0.91
  14   1  -4   18.88    1.44
 -14  -1  -4   19.13    1.51
 -14   1   4   16.52    1.44
  14  -1   4   18.31    1.51
 -14  -1   4   17.07    1.55
 -14   1  -4   18.37    1.39
  14  -1  -4   19.75    1.37
  14   1   4   17.49    1.41
  14   2  -4    8.93    1.19
 -14  -2  -4    7.40    1.05
 -14   2   4    9.04    1.16
  14  -2   4    9.11    1.08
 -14  -2   4    7.61    1.34
 -14   2  -4    8.41    1.11
  14  -2  -4    7.57    1.09
 -14  -3  -4    6.77    1.06
  14   3  -4    6.01    1.17
  14  -3   4    7.45    1.18
 -14   3   4    6.90    1.12
  14  -3  -4    7.81    1.17
 -14  -3   4    5.37    1.30
 -14   3  -4    7.33    1.13
 -14   4   4   19.01    1.36
  14   4  -4   10.20    1.64
  14  -4   4   17.23    1.55
 -14  -4  -4   16.39    1.44
 -14   4  -4   17.16    1.45
  14   5  -4    1.79    1.36
 -14   5   4    3.49    1.07
 -14  -5  -4    3.63    2.05
  14  -5   4    3.49    1.36
 -14  -5   4    2.83    1.54
  14   0   5   29.59    1.77
 -14   0   5   26.20    1.97
 -14   0  -5   27.19    1.79
  14   0  -5   27.54    1.83
  14  -1   5    1.17    0.87
  14   1  -5   -0.45    0.97
 -14  -1  -5    0.70    0.87
 -14   1   5    1.97    1.03
  14  -1  -5    0.29    0.96
 -14  -1   5    1.31    1.11
 -14   1  -5    1.02    0.91
  14   1   5    0.65    0.80
 -14   2   5   17.53    1.48
  14  -2   5   21.23    1.65
 -14  -2  -5   19.12    1.42
  14   2  -5   16.06    1.44
 -14   2  -5   16.39    1.43
  14   2   5   20.63    1.72
 -14  -2   5   16.01    1.64
  14  -2  -5   19.34    1.44
  14  -3   5    5.58    1.15
 -14  -3  -5    4.24    1.02
 -14   3   5    4.08    2.00
  14   3  -5    3.29    1.14
 -14  -3   5    4.52    1.37
 -14   3  -5    4.98    1.15
  14  -3  -5    6.87    1.16
 -14   4   5    5.12    1.69
  14  -4   5    6.11    1.32
 -14  -4  -5    3.81    1.35
  14   4  -5    6.27    1.34
 -14  -4   5    4.60    1.50
 -14   4  -5    4.04    1.18
 -14   0  -6   10.26    1.23
  14   0  -6    7.68    1.18
 -14   0   6    9.20    1.37
  14   0   6    8.92    1.10
 -14  -1  -6   10.35    1.23
  14   1  -6   13.90    1.40
  14  -1   6   14.91    1.28
 -14   1   6   11.51    1.44
 -14   1  -6   13.45    1.38
  14  -1  -6   12.04    1.31
 -14  -1   6   13.38    1.57
  14   1   6   11.96    1.18
  14   2  -6   22.34    1.68
 -14   2   6   22.71    1.74
  14  -2   6   24.79    1.81
 -14  -2  -6   22.67    1.76
  14   2   6   25.90    1.80
 -14   2  -6   22.25    1.64
 -14  -2   6   18.59    1.81
  14  -2  -6   21.80    1.59
  14   3  -6    4.77    1.32
 -14  -3  -6    3.21    1.08
  14  -3   6    4.94    1.17
  14  -3  -6    4.76    1.91
 -14  -3   6    2.33    1.44
 -14   3  -6    4.44    1.16
  14  -4   6    7.93    1.33
  14   4  -6    8.69    1.48
 -14  -4  -6    8.29    1.22
 -14  -4   6    8.72    1.65
  14   0  -7   28.91    1.93
  14   0   7   28.29    1.87
 -14   0  -7   29.43    2.10
 -14   0   7   25.19    1.95
 -14  -1  -7   17.38    1.69
 -14   1   7   12.52    1.51
  14   1  -7   14.54    1.59
  14  -1   7   14.64    1.35
 -14  -1   7   13.20    1.62
 -14   1  -7   14.61    1.57
  14  -1  -7   15.87    1.49
  14   1   7   14.41    1.33
 -14   2   7   34.68    2.40
  14   2  -7   37.58    2.41
  14  -2   7   39.25    2.20
  14  -2  -7   35.03    2.89
  14   2   7   39.91    2.19
 -14  -2   7   31.50    2.80
  14   3  -7    1.22    1.21
 -14  -3  -7    4.13    1.10
  14  -3   7    3.03    1.23
 -14  -3   7    2.31    1.47
  14  -3  -7    2.65    1.22
 -14   3  -7    2.83    1.18
  14   3   7    2.50    1.16
  14   0  -8    4.56    1.24
 -14   0   8    3.65    1.47
  14   0   8    6.90    1.21
 -14   0  -8    5.17    1.20
  14   1  -8    0.21    1.16
 -14   1   8    2.18    1.38
  14  -1   8    1.39    1.09
 -14  -1  -8    1.25    1.15
 -14   1  -8    1.34    1.11
  14   1   8    2.10    1.03
  14  -1  -8    1.04    1.17
 -14  -1   8    1.37    1.63
  14  -2   8    6.67    1.24
  14   2  -8    4.35    1.31
 -14  -2  -8    6.47    1.29
 -14   2   8    1.98    1.45
  14  -2  -8    6.78    1.33
  14   2   8    5.93    1.20
 -14  -2   8    2.18    1.56
 -14   2  -8    6.77    1.30
  15   0   0    0.97    0.95
 -15   0   0    0.31    0.86
 -15  -1   0    4.65    1.04
  15   1   0    5.18    1.11
  15  -1   0    4.41    1.02
 -15   1   0    5.28    1.00
 -15  -2   0    0.82    0.96
 -15   2   0    1.02    0.89
  15  -2   0    0.25    0.94
  15   2   0    0.98    1.09
 -15  -3   0    0.01    1.06
 -15   3   0    0.19    0.88
  15   3   0    1.57    1.17
 -15  -4   0    0.93    1.25
 -15   4   0    2.40    1.27
  15  -4   0    3.35    1.34
  15   4   0    0.97    1.29
 -15   0   1    0.05    0.87
  15   0   1    0.37    0.98
 -15   0  -1    0.39    0.82
  15   0  -1   -0.59    0.97
  15   1  -1   13.34    1.29
 -15   1   1   13.06    1.25
 -15  -1  -1   10.59    1.18
  15   1   1   14.39    1.29
  15  -1  -1   13.88    1.25
 -15   1  -1   12.82    1.19
 -15  -1   1   12.16    1.29
 -15  -2  -1    4.28    1.06
 -15   2   1    4.78    0.96
  15   2  -1    4.18    1.16
  15  -2  -1    6.14    1.07
  15   2   1    6.39    1.22
 -15  -2   1    5.43    1.17
 -15   2  -1    5.12    0.95
 -15  -3  -1    8.84    1.30
  15   3  -1    8.21    1.34
 -15   3   1    9.95    1.18
  15  -3   1   10.28    1.31
 -15  -3   1    8.90    1.37
 -15   3  -1    8.65    1.11
  15  -3  -1    9.58    1.22
  15   3   1    7.53    1.34
 -15  -4  -1    0.91    1.22
  15   4  -1    1.14    1.30
  15  -4   1    1.17    1.30
 -15  -4   1    1.10    1.33
  15  -4  -1    2.19    1.17
 -15   4  -1    1.22    0.98
  15   4   1    2.58    1.39
  15   0  -2    0.06    0.99
 -15   0  -2    0.08    0.80
 -15   0   2    0.73    0.94
 -15   1   2    5.60    1.05
 -15  -1  -2    5.66    1.02
  15   1  -2    4.32    1.09
 -15   1  -2    5.17    0.97
  15  -1  -2    4.58    1.01
 -15  -1   2    5.06    1.15
  15  -2   2    1.12    0.93
 -15  -2  -2    0.86    0.93
  15   2  -2   -0.15    1.04
 -15   2   2    0.49    0.90
 -15   2  -2    0.98    0.89
  15  -2  -2    0.42    0.94
 -15  -2   2    0.66    1.07
  15   3  -2    0.60    1.19
  15  -3   2    0.70    1.09
 -15   3   2    0.56    0.95
 -15  -3  -2    0.65    1.02
  15   3   2    0.37    1.33
 -15   3  -2    0.24    0.92
  15  -3  -2    0.73    1.02
 -15  -3   2    0.12    1.25
 -15  -4  -2    1.60    1.18
  15   4  -2    2.01    2.09
  15  -4   2    1.62    1.26
  15  -4  -2    2.43    1.19
 -15  -4   2    1.48    1.41
 -15   4  -2    1.28    1.03
  15   4   2    2.61    1.36
 -15   0  -3   -0.68    0.84
  15   0  -3   -1.18    0.98
 -15   0   3    1.00    1.00
 -15  -1  -3   10.03    1.15
  15  -1   3   11.89    1.13
  15   1  -3   10.31    1.28
 -15   1   3   10.78    1.31
  15  -1  -3    9.91    1.21
 -15   1  -3   11.20    1.20
 -15  -1   3   10.04    1.38
  15   2  -3    0.56    1.06
  15  -2   3    0.94    0.93
 -15  -2  -3    0.21    0.89
 -15   2   3    1.34    1.00
 -15  -2   3    2.42    1.25
 -15   2  -3    0.21    0.91
  15  -2  -3    1.11    1.01
 -15  -3  -3   19.48    1.93
  15   3  -3   16.08    1.56
 -15   3   3   16.55    1.50
  15  -3   3   16.98    1.52
 -15  -3   3   15.68    2.60
  15  -3  -3   15.02    1.43
 -15   3  -3   14.53    1.35
  15   4  -3    5.25    1.44
  15  -4   3    7.72    1.41
 -15  -4  -3    7.48    1.32
 -15   4  -3    8.09    1.24
 -15  -4   3    7.88    1.58
  15  -4  -3    7.78    1.34
 -15   0   4   -0.45    1.06
 -15   0  -4   -0.14    0.86
  15   0  -4   -0.55    1.02
 -15   1   4    0.88    1.02
  15   1  -4   -0.45    1.02
 -15  -1  -4    0.04    0.87
  15  -1   4    1.24    0.91
  15  -1  -4    0.73    1.00
 -15  -1   4    0.61    1.14
 -15   1  -4    0.69    0.93
 -15  -2  -4    3.03    1.01
 -15   2   4    3.99    1.13
  15  -2   4    5.61    1.05
  15   2  -4    3.92    1.18
 -15   2  -4    3.00    1.03
 -15  -2   4    2.84    1.34
  15  -2  -4    3.38    1.11
 -15  -3  -4    2.39    1.24
  15  -3   4    1.76    1.10
 -15   3   4    1.97    1.24
  15  -3  -4    3.08    1.15
 -15  -3   4    2.63    1.36
 -15   3  -4    1.92    1.05
 -15  -4  -4   31.11    2.25
 -15  -4   4   25.12    2.20
 -15   0   5    0.03    1.11
  15   0  -5   -0.30    1.04
 -15   0  -5   -0.19    0.95
  15   0   5    0.46    0.87
 -15  -1  -5    2.40    1.12
 -15   1   5    2.35    1.14
  15   1  -5    0.55    1.08
  15  -1   5    1.95    0.97
 -15   1  -5    1.36    1.02
 -15  -1   5    2.54    1.26
  15  -1  -5    1.36    1.08
  15  -2   5    3.27    1.06
 -15   2   5    3.48    1.19
 -15  -2  -5    2.85    1.34
  15  -2  -5    3.71    1.17
 -15   2  -5    4.88    1.29
 -15  -2   5    4.30    1.73
  15  -3   5    3.07    1.17
  15   3  -5    3.35    1.22
 -15  -3  -5    3.93    1.11
  15  -3  -5    6.79    1.38
 -15  -3   5    3.84    1.52
 -15   0  -6    0.62    1.06
 -15   0   6   -0.16    1.25
  15   0   6    0.36    0.94
 -15   1   6    0.24    1.19
  15  -1   6    1.67    1.01
  15   1  -6   -0.10    1.28
 -15  -1  -6   -0.24    1.02
  15   1   6    1.17    0.98
 -15   1  -6    1.38    1.11
  15   2  -6   12.35    1.49
  15  -2   6   12.81    1.37
 -15  -2  -6   12.96    1.40
 -15   2   6   14.13    1.65
 -15  -2   6   16.19    1.82
 -15   2  -6   12.18    1.45
  15  -2  -6   14.98    1.52
 -15   0  -7    0.88    1.14
  15   0   7    0.62    1.06
  15   0  -7   -0.63    1.17
 -15  -1  -7    0.06    1.10
 -15   1   7    0.17    1.32
  15   1  -7    0.57    1.24
  15  -1   7    1.01    1.10
 -15  -1   7   -0.15    1.40
  15   1   7    0.88    1.03
 -15   1  -7    0.61    1.18
  15  -1  -7    0.78    1.24
 -16   0   0    3.26    1.07
  16   0   0    1.76    1.15
 -16  -1   0   11.74    1.54
  16   1   0   12.51    1.39
 -16   1   0   10.25    1.28
 -16   2   0    5.16    1.13
 -16  -2   0    3.40    1.19
  16   2   0    3.15    1.29
[truncated: 2,671 more chars]
