# Supplementary material
Source: MDPI journal article supplement (https://www.mdpi.com/2073-4352/12/9/1251)
Supplement: s1 [file s1 › Compound 3.cif]

 
data_siv72
 
_audit_creation_method            SHELXL-2014/6
_chemical_name_systematic         ?
_chemical_name_common             ?
_chemical_melting_point           ?
_chemical_formula_moiety          
 'C2 H9 B10 Cl3' 
_chemical_formula_sum
 'C2 H9 B10 Cl3' 
_chemical_formula_weight          247.54

loop_
 _atom_type_symbol
 _atom_type_description
 _atom_type_scat_dispersion_real
 _atom_type_scat_dispersion_imag
 _atom_type_scat_source
 'C'  'C'   0.0033   0.0016
 'International Tables Vol C Tables 4.2.6.8 and 6.1.1.4'
 'H'  'H'   0.0000   0.0000
 'International Tables Vol C Tables 4.2.6.8 and 6.1.1.4'
 'B'  'B'   0.0013   0.0007
 'International Tables Vol C Tables 4.2.6.8 and 6.1.1.4'
 'Cl'  'Cl'   0.1484   0.1585
 'International Tables Vol C Tables 4.2.6.8 and 6.1.1.4'
 
_space_group_crystal_system       monoclinic
_space_group_IT_number            9
_space_group_name_H-M_alt         'C c'
_space_group_name_Hall            'C -2yc'
 
_shelx_space_group_comment
;
The symmetry employed for this shelxl refinement is uniquely defined
by the following loop, which should always be used as a source of
symmetry information in preference to the above space-group names.
They are only intended as comments.
;
 
loop_
 _space_group_symop_operation_xyz
 'x, y, z'
 'x, -y, z+1/2'
 'x+1/2, y+1/2, z'
 'x+1/2, -y+1/2, z+1/2'
 
_cell_length_a                    12.5845(9)
_cell_length_b                    7.0519(5)
_cell_length_c                    13.8263(10)
_cell_angle_alpha                 90
_cell_angle_beta                  113.098(3)
_cell_angle_gamma                 90
_cell_volume                      1128.65(14)
_cell_formula_units_Z             4
_cell_measurement_temperature     120(2)
_cell_measurement_reflns_used     4428
_cell_measurement_theta_min       3.20
_cell_measurement_theta_max       26.02
 
_exptl_crystal_description        prizm
_exptl_crystal_colour             'colorless'
_exptl_crystal_density_meas       ?
_exptl_crystal_density_method     ?
_exptl_crystal_density_diffrn     1.457          
_exptl_crystal_F_000              488
_exptl_transmission_factor_min    ?
_exptl_transmission_factor_max    ?
_exptl_crystal_size_max           0.020
_exptl_crystal_size_mid           0.016
_exptl_crystal_size_min           0.013
_exptl_absorpt_coefficient_mu     0.754
_shelx_estimated_absorpt_T_min    ?
_shelx_estimated_absorpt_T_max    ?
_exptl_absorpt_correction_type    'multi-scan'
_exptl_absorpt_correction_T_min   0.953
_exptl_absorpt_correction_T_max   0.990
_exptl_absorpt_process_details    'SADABS-2014/5 (Bruker,2014/5)' 
_exptl_absorpt_special_details    ?
_diffrn_ambient_temperature       120(2)
_diffrn_radiation_wavelength      0.71073
_diffrn_radiation_type            MoK\a
_diffrn_source                    'sealed tube'
_diffrn_measurement_device_type   'Bruker APEX-II CCD' 
_diffrn_measurement_method        '\f and \w scans' 
_diffrn_detector_area_resol_mean  ?
_diffrn_reflns_number             5298
_diffrn_reflns_av_unetI/netI      0.0332
_diffrn_reflns_av_R_equivalents   0.0246
_diffrn_reflns_limit_h_min        -15
_diffrn_reflns_limit_h_max        15
_diffrn_reflns_limit_k_min        -8
_diffrn_reflns_limit_k_max        8
_diffrn_reflns_limit_l_min        -17
_diffrn_reflns_limit_l_max        17
_diffrn_reflns_theta_min          3.204
_diffrn_reflns_theta_max          26.027
_diffrn_reflns_theta_full         25.242
_diffrn_measured_fraction_theta_max   1.000
_diffrn_measured_fraction_theta_full  1.000
_diffrn_reflns_Laue_measured_fraction_max    1.000
_diffrn_reflns_Laue_measured_fraction_full   1.000
_diffrn_reflns_point_group_measured_fraction_max   0.989
_diffrn_reflns_point_group_measured_fraction_full  0.991
_reflns_number_total              2197
_reflns_number_gt                 2116
_reflns_threshold_expression      'I > 2\s(I)'
_reflns_Friedel_coverage          0.974
_reflns_Friedel_fraction_max      0.977
_reflns_Friedel_fraction_full     0.982
 
_reflns_special_details
;
 Reflections were merged by SHELXL according to the crystal
 class for the calculation of statistics and refinement.
 
 _reflns_Friedel_fraction is defined as the number of unique
 Friedel pairs measured divided by the number that would be
 possible theoretically, ignoring centric projections and
 systematic absences.
;
 
_computing_data_collection        'APEX (Bruker, 2014)' 
_computing_cell_refinement        'SAINT (Bruker, 2014)' 
_computing_data_reduction         'SAINT (Bruker, 2014)'
_computing_structure_solution   'SHELXL-2014/6 (Sheldrick, 2014)'
_computing_structure_refinement 'SHELXL-2014/6 (Sheldrick, 2014)'
_computing_molecular_graphics   'SHELXL-2014/6 (Sheldrick, 2014)'
_computing_publication_material   
'SHELXL-2014/6 (Sheldrick, 2014) and PLATON (Spek, 2009)'
_refine_special_details           
;
 One of Cl atoms is disordered over two cites: at B8 and B10 atoms in the ratio
 of 0.840(4):0.160(4). Both parts were refined anisotropically. The hydrogen 
 atoms at  B8 and B10 were added geometrically.
;
_refine_ls_structure_factor_coef  Fsqd
_refine_ls_matrix_type            full
_refine_ls_weighting_scheme       calc
_refine_ls_weighting_details
'w=1/[\s^2^(Fo^2^)+(0.0337P)^2^+0.6093P] where P=(Fo^2^+2Fc^2^)/3'
_atom_sites_solution_primary      direct
_atom_sites_solution_secondary    difmap
_atom_sites_solution_hydrogens    mixed
_refine_ls_hydrogen_treatment     mixed
_refine_ls_extinction_method      none
_refine_ls_extinction_coef        .
_refine_ls_abs_structure_details
;
 Flack x determined using 1000 quotients [(I+)-(I-)]/[(I+)+(I-)]
 (Parsons, Flack and Wagner, Acta Cryst. B69 (2013) 249-259).
;
_refine_ls_abs_structure_Flack    0.04(3)
_chemical_absolute_configuration  'ad'
_refine_ls_number_reflns          2197
_refine_ls_number_parameters      178
_refine_ls_number_restraints      2
_refine_ls_R_factor_all           0.0314
_refine_ls_R_factor_gt            0.0296
_refine_ls_wR_factor_ref          0.0700
_refine_ls_wR_factor_gt           0.0693
_refine_ls_goodness_of_fit_ref    1.124
_refine_ls_restrained_S_all       1.124
_refine_ls_shift/su_max           0.000
_refine_ls_shift/su_mean          0.000
 
loop_
 _atom_site_label
 _atom_site_type_symbol
 _atom_site_fract_x
 _atom_site_fract_y
 _atom_site_fract_z
 _atom_site_U_iso_or_equiv
 _atom_site_adp_type
 _atom_site_occupancy
 _atom_site_site_symmetry_order  
 _atom_site_calc_flag
 _atom_site_refinement_flags_posn
 _atom_site_refinement_flags_adp
 _atom_site_refinement_flags_occupancy
 _atom_site_disorder_assembly
 _atom_site_disorder_group
Cl9 Cl 1.22423(8) 0.51248(15) 1.01382(7) 0.0213(2) Uani 1 1 d . . . . .
Cl12 Cl 0.98356(11) 0.19072(13) 0.97849(9) 0.0246(2) Uani 1 1 d . . . . .
Cl8 Cl 1.22518(8) 0.03136(16) 0.92307(7) 0.0197(3) Uani 0.840(4) 1 d . . P A 1
Cl10 Cl 0.9525(7) 0.6882(11) 0.9054(6) 0.035(2) Uani 0.160(4) 1 d . . P A 2
C1 C 1.0566(4) 0.4446(6) 0.6724(3) 0.0185(8) Uani 1 1 d . . . . .
C2 C 0.9487(3) 0.3033(6) 0.6573(3) 0.0191(8) Uani 1 1 d . . . . .
B3 B 1.0862(4) 0.2083(6) 0.7022(4) 0.0189(9) Uani 1 1 d . . . . .
B4 B 1.1743(4) 0.3931(7) 0.7820(3) 0.0190(9) Uani 1 1 d . . . . .
B5 B 1.0840(4) 0.5926(6) 0.7752(3) 0.0174(9) Uani 1 1 d . . . . .
B6 B 0.9396(4) 0.5355(6) 0.6920(4) 0.0200(9) Uani 1 1 d . . . . .
B7 B 0.9831(4) 0.1432(6) 0.7551(3) 0.0168(8) Uani 1 1 d . . . . .
B8 B 1.1280(4) 0.2013(6) 0.8401(3) 0.0164(9) Uani 1 1 d . . . . .
H8 H 1.1894 0.0940 0.8924 0.020 Uiso 0.160(4) 1 d R U P A 2
B9 B 1.1264(4) 0.4390(6) 0.8855(3) 0.0167(9) Uani 1 1 d . . . . .
B10 B 0.9811(4) 0.5278(6) 0.8288(4) 0.0188(9) Uani 1 1 d . . . . .
H10 H 0.9625 0.6350 0.8799 0.023 Uiso 0.840(4) 1 d R U P A 1
B11 B 0.8936(4) 0.3439(7) 0.7489(4) 0.0189(9) Uani 1 1 d . . . . .
B12 B 1.0084(4) 0.2839(6) 0.8685(3) 0.0161(9) Uani 1 1 d . . . . .
H1 H 1.061(4) 0.472(5) 0.612(4) 0.011(10) Uiso 1 1 d . . . . .
H2 H 0.906(4) 0.270(7) 0.590(4) 0.033(13) Uiso 1 1 d . . . . .
H3 H 1.110(4) 0.118(6) 0.654(3) 0.020(11) Uiso 1 1 d . . . . .
H4 H 1.262(4) 0.408(6) 0.792(3) 0.018(11) Uiso 1 1 d . . . . .
H5 H 1.117(4) 0.717(8) 0.771(4) 0.045(15) Uiso 1 1 d . . . . .
H6 H 0.882(4) 0.619(7) 0.631(4) 0.035(13) Uiso 1 1 d . . . . .
H7 H 0.948(4) 0.007(6) 0.744(4) 0.024(12) Uiso 1 1 d . . . . .
H11 H 0.807(4) 0.328(6) 0.730(3) 0.015(10) Uiso 1 1 d . . . . .
 
loop_
 _atom_site_aniso_label
 _atom_site_aniso_U_11
 _atom_site_aniso_U_22
 _atom_site_aniso_U_33
 _atom_site_aniso_U_23
 _atom_site_aniso_U_13
 _atom_site_aniso_U_12
Cl9 0.0224(5) 0.0191(5) 0.0174(5) -0.0039(4) 0.0026(4) -0.0059(4)
Cl12 0.0342(6) 0.0233(5) 0.0205(5) -0.0001(4) 0.0154(4) -0.0069(5)
Cl8 0.0203(7) 0.0137(6) 0.0184(6) -0.0003(4) 0.0004(5) 0.0038(5)
Cl10 0.041(5) 0.035(4) 0.034(4) 0.012(3) 0.020(3) 0.022(3)
C1 0.023(2) 0.019(2) 0.015(2) 0.0029(16) 0.0088(16) -0.0001(16)
C2 0.019(2) 0.0183(19) 0.0160(19) 0.0011(15) 0.0027(17) -0.0033(15)
B3 0.021(2) 0.016(2) 0.020(2) -0.0025(17) 0.0096(18) -0.0011(17)
B4 0.019(2) 0.018(2) 0.020(2) 0.0023(17) 0.0080(18) -0.0004(17)
B5 0.022(2) 0.013(2) 0.018(2) -0.0001(18) 0.0094(17) -0.0031(17)
B6 0.019(2) 0.015(2) 0.023(2) 0.0025(17) 0.0052(17) 0.0012(17)
B7 0.016(2) 0.015(2) 0.0175(19) 0.0001(17) 0.0052(17) -0.0014(17)
B8 0.018(2) 0.014(2) 0.017(2) -0.0008(15) 0.0062(17) -0.0021(16)
B9 0.020(2) 0.014(2) 0.015(2) -0.0005(16) 0.0062(17) -0.0060(17)
B10 0.024(2) 0.013(2) 0.020(2) -0.0014(17) 0.0104(18) -0.0018(17)
B11 0.015(2) 0.017(2) 0.022(2) 0.0013(17) 0.0053(18) -0.0011(17)
B12 0.018(2) 0.015(2) 0.016(2) 0.0007(16) 0.0071(17) -0.0052(17)
 
_geom_special_details
;
 All esds (except the esd in the dihedral angle between two l.s. planes)
 are estimated using the full covariance matrix.  The cell esds are taken
 into account individually in the estimation of esds in distances, angles
 and torsion angles; correlations between esds in cell parameters are only
 used when they are defined by crystal symmetry.  An approximate (isotropic)
 treatment of cell esds is used for estimating esds involving l.s. planes.
;
 
loop_
 _geom_bond_atom_site_label_1
 _geom_bond_atom_site_label_2
 _geom_bond_distance
 _geom_bond_site_symmetry_2
 _geom_bond_publ_flag
Cl9 B9 1.794(4) . ?
Cl12 B12 1.793(4) . ?
Cl8 B8 1.774(5) . ?
Cl10 B10 1.682(8) . ?
C1 C2 1.630(5) . ?
C1 B5 1.686(6) . ?
C1 B4 1.692(6) . ?
C1 B6 1.722(6) . ?
C1 B3 1.722(6) . ?
C1 H1 0.88(4) . ?
C2 B7 1.682(5) . ?
C2 B11 1.689(6) . ?
C2 B6 1.723(6) . ?
C2 B3 1.727(6) . ?
C2 H2 0.90(5) . ?
B3 B8 1.768(6) . ?
B3 B7 1.781(6) . ?
B3 B4 1.785(7) . ?
B3 H3 1.05(5) . ?
B4 B8 1.784(6) . ?
B4 B9 1.787(6) . ?
B4 B5 1.788(6) . ?
B4 H4 1.06(4) . ?
B5 B6 1.774(6) . ?
B5 B9 1.774(6) . ?
B5 B10 1.785(6) . ?
B5 H5 0.98(6) . ?
B6 B10 1.755(6) . ?
B6 B11 1.771(6) . ?
B6 H6 1.05(5) . ?
B7 B12 1.776(6) . ?
B7 B8 1.787(6) . ?
B7 B11 1.790(6) . ?
B7 H7 1.04(5) . ?
B8 B9 1.793(6) . ?
B8 B12 1.795(6) . ?
B8 H8 1.1200 . ?
B9 B12 1.784(6) . ?
B9 B10 1.796(6) . ?
B10 B11 1.778(6) . ?
B10 B12 1.798(6) . ?
B10 H10 1.1200 . ?
B11 B12 1.769(6) . ?
B11 H11 1.02(4) . ?
 
loop_
 _geom_angle_atom_site_label_1
 _geom_angle_atom_site_label_2
 _geom_angle_atom_site_label_3
 _geom_angle
 _geom_angle_site_symmetry_1
 _geom_angle_site_symmetry_3
 _geom_angle_publ_flag
C2 C1 B5 111.8(3) . . ?
C2 C1 B4 112.1(3) . . ?
B5 C1 B4 63.9(3) . . ?
C2 C1 B6 61.8(2) . . ?
B5 C1 B6 62.7(3) . . ?
B4 C1 B6 116.2(3) . . ?
C2 C1 B3 62.0(2) . . ?
B5 C1 B3 116.4(3) . . ?
B4 C1 B3 63.0(3) . . ?
B6 C1 B3 116.2(3) . . ?
C2 C1 H1 112(3) . . ?
B5 C1 H1 127(3) . . ?
B4 C1 H1 122(3) . . ?
B6 C1 H1 116(3) . . ?
B3 C1 H1 110(3) . . ?
C1 C2 B7 111.7(3) . . ?
C1 C2 B11 111.5(3) . . ?
B7 C2 B11 64.1(3) . . ?
C1 C2 B6 61.7(3) . . ?
B7 C2 B6 116.0(3) . . ?
B11 C2 B6 62.5(3) . . ?
C1 C2 B3 61.6(2) . . ?
B7 C2 B3 63.0(3) . . ?
B11 C2 B3 116.4(3) . . ?
B6 C2 B3 115.8(3) . . ?
C1 C2 H2 115(3) . . ?
B7 C2 H2 121(3) . . ?
B11 C2 H2 124(3) . . ?
B6 C2 H2 117(3) . . ?
B3 C2 H2 112(3) . . ?
C1 B3 C2 56.4(2) . . ?
C1 B3 B8 103.3(3) . . ?
C2 B3 B8 103.3(3) . . ?
C1 B3 B7 102.9(3) . . ?
C2 B3 B7 57.3(2) . . ?
B8 B3 B7 60.5(2) . . ?
C1 B3 B4 57.6(2) . . ?
C2 B3 B4 103.3(3) . . ?
B8 B3 B4 60.3(2) . . ?
B7 B3 B4 108.1(3) . . ?
C1 B3 H3 121(2) . . ?
C2 B3 H3 120(2) . . ?
B8 B3 H3 129(2) . . ?
B7 B3 H3 123(2) . . ?
B4 B3 H3 125(2) . . ?
C1 B4 B8 103.9(3) . . ?
C1 B4 B3 59.3(3) . . ?
B8 B4 B3 59.4(3) . . ?
C1 B4 B9 103.1(3) . . ?
B8 B4 B9 60.3(2) . . ?
B3 B4 B9 107.7(3) . . ?
C1 B4 B5 57.9(2) . . ?
B8 B4 B5 107.9(3) . . ?
B3 B4 B5 108.3(3) . . ?
B9 B4 B5 59.5(2) . . ?
C1 B4 H4 127(2) . . ?
B8 B4 H4 121(2) . . ?
B3 B4 H4 121(2) . . ?
B9 B4 H4 123(2) . . ?
B5 B4 H4 123(2) . . ?
C1 B5 B6 59.6(2) . . ?
C1 B5 B9 103.9(3) . . ?
B6 B5 B9 107.8(3) . . ?
C1 B5 B10 104.5(3) . . ?
B6 B5 B10 59.1(3) . . ?
B9 B5 B10 60.6(2) . . ?
C1 B5 B4 58.2(2) . . ?
B6 B5 B4 108.9(3) . . ?
B9 B5 B4 60.2(2) . . ?
B10 B5 B4 109.1(3) . . ?
C1 B5 H5 117(3) . . ?
B6 B5 H5 121(3) . . ?
B9 B5 H5 127(3) . . ?
B10 B5 H5 131(3) . . ?
B4 B5 H5 115(3) . . ?
C1 B6 C2 56.5(2) . . ?
C1 B6 B10 104.3(3) . . ?
C2 B6 B10 104.3(3) . . ?
C1 B6 B11 103.5(3) . . ?
C2 B6 B11 57.8(3) . . ?
B10 B6 B11 60.6(3) . . ?
C1 B6 B5 57.7(2) . . ?
C2 B6 B5 103.5(3) . . ?
B10 B6 B5 60.8(3) . . ?
B11 B6 B5 108.4(3) . . ?
C1 B6 H6 116(3) . . ?
C2 B6 H6 114(3) . . ?
B10 B6 H6 135(3) . . ?
B11 B6 H6 123(3) . . ?
B5 B6 H6 127(3) . . ?
C2 B7 B12 103.6(3) . . ?
C2 B7 B3 59.8(2) . . ?
B12 B7 B3 108.1(3) . . ?
C2 B7 B8 104.4(3) . . ?
B12 B7 B8 60.5(2) . . ?
B3 B7 B8 59.4(2) . . ?
C2 B7 B11 58.1(2) . . ?
B12 B7 B11 59.5(2) . . ?
B3 B7 B11 108.8(3) . . ?
B8 B7 B11 108.1(3) . . ?
C2 B7 H7 123(3) . . ?
B12 B7 H7 124(2) . . ?
B3 B7 H7 121(2) . . ?
B8 B7 H7 125(3) . . ?
B11 B7 H7 120(2) . . ?
B3 B8 Cl8 123.7(3) . . ?
B3 B8 B4 60.3(2) . . ?
Cl8 B8 B4 122.6(3) . . ?
B3 B8 B7 60.1(2) . . ?
Cl8 B8 B7 122.5(3) . . ?
B4 B8 B7 107.9(3) . . ?
B3 B8 B9 108.2(3) . . ?
Cl8 B8 B9 120.3(3) . . ?
B4 B8 B9 60.0(2) . . ?
B7 B8 B9 107.2(3) . . ?
B3 B8 B12 107.9(3) . . ?
Cl8 B8 B12 120.1(3) . . ?
B4 B8 B12 107.6(3) . . ?
B7 B8 B12 59.5(2) . . ?
B9 B8 B12 59.6(2) . . ?
B3 B8 H8 123.6 . . ?
B4 B8 H8 122.6 . . ?
B7 B8 H8 122.5 . . ?
B9 B8 H8 120.3 . . ?
B12 B8 H8 120.2 . . ?
B5 B9 B12 107.9(3) . . ?
B5 B9 B4 60.3(2) . . ?
B12 B9 B4 108.0(3) . . ?
B5 B9 B8 108.1(3) . . ?
B12 B9 B8 60.2(2) . . ?
B4 B9 B8 59.8(2) . . ?
B5 B9 Cl9 122.2(3) . . ?
B12 B9 Cl9 121.3(3) . . ?
B4 B9 Cl9 121.9(3) . . ?
B8 B9 Cl9 121.3(3) . . ?
B5 B9 B10 60.0(2) . . ?
B12 B9 B10 60.3(2) . . ?
B4 B9 B10 108.6(3) . . ?
B8 B9 B10 108.8(3) . . ?
Cl9 B9 B10 121.1(3) . . ?
Cl10 B10 B6 127.7(4) . . ?
Cl10 B10 B11 130.4(4) . . ?
B6 B10 B11 60.2(3) . . ?
Cl10 B10 B5 117.3(4) . . ?
B6 B10 B5 60.1(3) . . ?
B11 B10 B5 107.6(3) . . ?
Cl10 B10 B9 113.1(4) . . ?
B6 B10 B9 107.6(3) . . ?
B11 B10 B9 107.0(3) . . ?
B5 B10 B9 59.4(2) . . ?
Cl10 B10 B12 120.9(4) . . ?
B6 B10 B12 107.4(3) . . ?
B11 B10 B12 59.3(2) . . ?
B5 B10 B12 106.8(3) . . ?
B9 B10 B12 59.5(2) . . ?
B6 B10 H10 127.7 . . ?
B11 B10 H10 130.7 . . ?
B5 B10 H10 117.0 . . ?
B9 B10 H10 112.9 . . ?
B12 B10 H10 121.0 . . ?
C2 B11 B12 103.6(3) . . ?
C2 B11 B6 59.7(3) . . ?
B12 B11 B6 108.0(3) . . ?
C2 B11 B10 104.7(3) . . ?
B12 B11 B10 60.9(2) . . ?
B6 B11 B10 59.3(3) . . ?
C2 B11 B7 57.7(2) . . ?
B12 B11 B7 59.9(2) . . ?
B6 B11 B7 108.4(3) . . ?
B10 B11 B7 108.8(3) . . ?
C2 B11 H11 120(2) . . ?
B12 B11 H11 128(2) . . ?
B6 B11 H11 118(2) . . ?
B10 B11 H11 125(2) . . ?
B7 B11 H11 121(2) . . ?
B11 B12 B7 60.7(2) . . ?
B11 B12 B9 108.0(3) . . ?
B7 B12 B9 108.1(3) . . ?
B11 B12 Cl12 122.1(3) . . ?
B7 B12 Cl12 120.9(3) . . ?
B9 B12 Cl12 121.7(3) . . ?
B11 B12 B8 108.7(3) . . ?
B7 B12 B8 60.0(2) . . ?
B9 B12 B8 60.1(2) . . ?
Cl12 B12 B8 120.5(3) . . ?
B11 B12 B10 59.8(3) . . ?
B7 B12 B10 108.6(3) . . ?
B9 B12 B10 60.2(3) . . ?
Cl12 B12 B10 122.3(3) . . ?
B8 B12 B10 108.6(3) . . ?
 
loop_
 _geom_torsion_atom_site_label_1
 _geom_torsion_atom_site_label_2
 _geom_torsion_atom_site_label_3
 _geom_torsion_atom_site_label_4
 _geom_torsion
 _geom_torsion_site_symmetry_1
 _geom_torsion_site_symmetry_2
 _geom_torsion_site_symmetry_3
 _geom_torsion_site_symmetry_4
 _geom_torsion_publ_flag
B5 C1 C2 B7 -69.6(4) . . . . ?
B4 C1 C2 B7 0.1(4) . . . . ?
B6 C1 C2 B7 -108.8(3) . . . . ?
B3 C1 C2 B7 39.6(3) . . . . ?
B5 C1 C2 B11 0.1(4) . . . . ?
B4 C1 C2 B11 69.7(4) . . . . ?
B6 C1 C2 B11 -39.2(3) . . . . ?
B3 C1 C2 B11 109.3(3) . . . . ?
B5 C1 C2 B6 39.3(3) . . . . ?
B4 C1 C2 B6 108.9(3) . . . . ?
B3 C1 C2 B6 148.5(3) . . . . ?
B5 C1 C2 B3 -109.2(3) . . . . ?
B4 C1 C2 B3 -39.6(3) . . . . ?
B6 C1 C2 B3 -148.5(3) . . . . ?
B5 C1 B3 C2 101.8(4) . . . . ?
B4 C1 B3 C2 138.5(3) . . . . ?
B6 C1 B3 C2 30.9(3) . . . . ?
C2 C1 B3 B8 -97.3(3) . . . . ?
B5 C1 B3 B8 4.5(4) . . . . ?
B4 C1 B3 B8 41.2(3) . . . . ?
B6 C1 B3 B8 -66.4(4) . . . . ?
C2 C1 B3 B7 -35.1(3) . . . . ?
B5 C1 B3 B7 66.8(4) . . . . ?
B4 C1 B3 B7 103.4(3) . . . . ?
B6 C1 B3 B7 -4.2(4) . . . . ?
C2 C1 B3 B4 -138.5(3) . . . . ?
B5 C1 B3 B4 -36.7(3) . . . . ?
B6 C1 B3 B4 -107.6(4) . . . . ?
B7 C2 B3 C1 -138.3(3) . . . . ?
B11 C2 B3 C1 -101.4(4) . . . . ?
B6 C2 B3 C1 -30.8(3) . . . . ?
C1 C2 B3 B8 97.2(3) . . . . ?
B7 C2 B3 B8 -41.0(3) . . . . ?
B11 C2 B3 B8 -4.1(4) . . . . ?
B6 C2 B3 B8 66.5(4) . . . . ?
C1 C2 B3 B7 138.3(3) . . . . ?
B11 C2 B3 B7 36.9(3) . . . . ?
B6 C2 B3 B7 107.5(4) . . . . ?
C1 C2 B3 B4 35.1(3) . . . . ?
B7 C2 B3 B4 -103.1(3) . . . . ?
B11 C2 B3 B4 -66.3(4) . . . . ?
B6 C2 B3 B4 4.3(4) . . . . ?
C2 C1 B4 B8 -1.7(4) . . . . ?
B5 C1 B4 B8 102.6(3) . . . . ?
B6 C1 B4 B8 66.7(4) . . . . ?
B3 C1 B4 B8 -40.8(3) . . . . ?
C2 C1 B4 B3 39.1(3) . . . . ?
B5 C1 B4 B3 143.4(3) . . . . ?
B6 C1 B4 B3 107.5(4) . . . . ?
C2 C1 B4 B9 -63.9(4) . . . . ?
B5 C1 B4 B9 40.4(3) . . . . ?
B6 C1 B4 B9 4.5(4) . . . . ?
B3 C1 B4 B9 -103.0(3) . . . . ?
C2 C1 B4 B5 -104.3(3) . . . . ?
B6 C1 B4 B5 -35.9(3) . . . . ?
B3 C1 B4 B5 -143.4(3) . . . . ?
C2 B3 B4 C1 -34.6(3) . . . . ?
B8 B3 B4 C1 -132.4(3) . . . . ?
B7 B3 B4 C1 -94.1(3) . . . . ?
C1 B3 B4 B8 132.4(3) . . . . ?
C2 B3 B4 B8 97.9(3) . . . . ?
B7 B3 B4 B8 38.4(3) . . . . ?
C1 B3 B4 B9 95.0(3) . . . . ?
C2 B3 B4 B9 60.4(4) . . . . ?
B8 B3 B4 B9 -37.5(3) . . . . ?
B7 B3 B4 B9 0.9(4) . . . . ?
C1 B3 B4 B5 32.1(3) . . . . ?
C2 B3 B4 B5 -2.5(4) . . . . ?
B8 B3 B4 B5 -100.4(3) . . . . ?
B7 B3 B4 B5 -62.0(4) . . . . ?
C2 C1 B5 B6 -38.9(3) . . . . ?
B4 C1 B5 B6 -143.7(3) . . . . ?
B3 C1 B5 B6 -107.3(4) . . . . ?
C2 C1 B5 B9 63.8(4) . . . . ?
B4 C1 B5 B9 -41.0(3) . . . . ?
B6 C1 B5 B9 102.7(3) . . . . ?
B3 C1 B5 B9 -4.6(4) . . . . ?
C2 C1 B5 B10 1.1(4) . . . . ?
B4 C1 B5 B10 -103.7(3) . . . . ?
B6 C1 B5 B10 40.0(3) . . . . ?
B3 C1 B5 B10 -67.4(4) . . . . ?
C2 C1 B5 B4 104.8(3) . . . . ?
B6 C1 B5 B4 143.7(3) . . . . ?
B3 C1 B5 B4 36.3(3) . . . . ?
B8 B4 B5 C1 -95.4(3) . . . . ?
B3 B4 B5 C1 -32.6(3) . . . . ?
B9 B4 B5 C1 -132.8(3) . . . . ?
C1 B4 B5 B6 32.7(3) . . . . ?
B8 B4 B5 B6 -62.7(4) . . . . ?
B3 B4 B5 B6 0.1(4) . . . . ?
B9 B4 B5 B6 -100.1(3) . . . . ?
C1 B4 B5 B9 132.8(3) . . . . ?
B8 B4 B5 B9 37.4(3) . . . . ?
B3 B4 B5 B9 100.2(3) . . . . ?
C1 B4 B5 B10 95.6(3) . . . . ?
B8 B4 B5 B10 0.1(4) . . . . ?
B3 B4 B5 B10 62.9(4) . . . . ?
B9 B4 B5 B10 -37.3(3) . . . . ?
B5 C1 B6 C2 -138.6(3) . . . . ?
B4 C1 B6 C2 -102.2(3) . . . . ?
B3 C1 B6 C2 -30.9(3) . . . . ?
C2 C1 B6 B10 97.8(3) . . . . ?
B5 C1 B6 B10 -40.8(3) . . . . ?
B4 C1 B6 B10 -4.4(4) . . . . ?
B3 C1 B6 B10 66.9(4) . . . . ?
C2 C1 B6 B11 35.2(3) . . . . ?
B5 C1 B6 B11 -103.4(3) . . . . ?
B4 C1 B6 B11 -67.0(4) . . . . ?
B3 C1 B6 B11 4.3(4) . . . . ?
C2 C1 B6 B5 138.6(3) . . . . ?
B4 C1 B6 B5 36.4(3) . . . . ?
B3 C1 B6 B5 107.7(4) . . . . ?
B7 C2 B6 C1 101.8(3) . . . . ?
B11 C2 B6 C1 138.5(3) . . . . ?
B3 C2 B6 C1 30.7(3) . . . . ?
C1 C2 B6 B10 -97.9(3) . . . . ?
B7 C2 B6 B10 3.9(4) . . . . ?
B11 C2 B6 B10 40.6(3) . . . . ?
B3 C2 B6 B10 -67.1(4) . . . . ?
C1 C2 B6 B11 -138.5(3) . . . . ?
B7 C2 B6 B11 -36.7(3) . . . . ?
B3 C2 B6 B11 -107.8(4) . . . . ?
C1 C2 B6 B5 -35.1(3) . . . . ?
B7 C2 B6 B5 66.7(4) . . . . ?
B11 C2 B6 B5 103.4(3) . . . . ?
B3 C2 B6 B5 -4.3(4) . . . . ?
B9 B5 B6 C1 -96.0(3) . . . . ?
B10 B5 B6 C1 -133.5(3) . . . . ?
B4 B5 B6 C1 -32.2(3) . . . . ?
C1 B5 B6 C2 34.5(3) . . . . ?
B9 B5 B6 C2 -61.4(4) . . . . ?
B10 B5 B6 C2 -99.0(3) . . . . ?
B4 B5 B6 C2 2.4(4) . . . . ?
C1 B5 B6 B10 133.5(3) . . . . ?
B9 B5 B6 B10 37.6(3) . . . . ?
B4 B5 B6 B10 101.4(3) . . . . ?
C1 B5 B6 B11 94.7(3) . . . . ?
B9 B5 B6 B11 -1.3(4) . . . . ?
B10 B5 B6 B11 -38.8(3) . . . . ?
B4 B5 B6 B11 62.5(4) . . . . ?
C1 C2 B7 B12 64.2(4) . . . . ?
B11 C2 B7 B12 -40.0(3) . . . . ?
B6 C2 B7 B12 -3.9(4) . . . . ?
B3 C2 B7 B12 103.3(3) . . . . ?
C1 C2 B7 B3 -39.1(3) . . . . ?
B11 C2 B7 B3 -143.3(3) . . . . ?
B6 C2 B7 B3 -107.2(4) . . . . ?
C1 C2 B7 B8 1.6(4) . . . . ?
B11 C2 B7 B8 -102.6(3) . . . . ?
B6 C2 B7 B8 -66.5(4) . . . . ?
B3 C2 B7 B8 40.7(3) . . . . ?
C1 C2 B7 B11 104.2(3) . . . . ?
B6 C2 B7 B11 36.1(3) . . . . ?
B3 C2 B7 B11 143.3(3) . . . . ?
C1 B3 B7 C2 34.7(3) . . . . ?
B8 B3 B7 C2 132.8(3) . . . . ?
B4 B3 B7 C2 94.5(3) . . . . ?
C1 B3 B7 B12 -60.8(4) . . . . ?
C2 B3 B7 B12 -95.5(3) . . . . ?
B8 B3 B7 B12 37.3(3) . . . . ?
B4 B3 B7 B12 -1.0(4) . . . . ?
C1 B3 B7 B8 -98.1(3) . . . . ?
C2 B3 B7 B8 -132.8(3) . . . . ?
B4 B3 B7 B8 -38.3(3) . . . . ?
C1 B3 B7 B11 2.2(4) . . . . ?
C2 B3 B7 B11 -32.4(3) . . . . ?
B8 B3 B7 B11 100.4(3) . . . . ?
B4 B3 B7 B11 62.1(4) . . . . ?
C1 B3 B8 Cl8 -151.3(3) . . . . ?
C2 B3 B8 Cl8 150.6(3) . . . . ?
B7 B3 B8 Cl8 111.2(4) . . . . ?
B4 B3 B8 Cl8 -111.5(4) . . . . ?
C1 B3 B8 B4 -39.8(3) . . . . ?
C2 B3 B8 B4 -97.9(3) . . . . ?
B7 B3 B8 B4 -137.3(3) . . . . ?
C1 B3 B8 B7 97.5(3) . . . . ?
C2 B3 B8 B7 39.4(3) . . . . ?
B4 B3 B8 B7 137.3(3) . . . . ?
C1 B3 B8 B9 -2.4(4) . . . . ?
C2 B3 B8 B9 -60.5(4) . . . . ?
B7 B3 B8 B9 -99.8(3) . . . . ?
B4 B3 B8 B9 37.5(3) . . . . ?
C1 B3 B8 B12 60.7(4) . . . . ?
C2 B3 B8 B12 2.6(4) . . . . ?
B7 B3 B8 B12 -36.8(3) . . . . ?
B4 B3 B8 B12 100.5(3) . . . . ?
C1 B4 B8 B3 40.8(3) . . . . ?
B9 B4 B8 B3 138.1(3) . . . . ?
B5 B4 B8 B3 101.1(4) . . . . ?
C1 B4 B8 Cl8 154.0(3) . . . . ?
B3 B4 B8 Cl8 113.1(4) . . . . ?
B9 B4 B8 Cl8 -108.7(4) . . . . ?
B5 B4 B8 Cl8 -145.8(3) . . . . ?
C1 B4 B8 B7 2.6(4) . . . . ?
B3 B4 B8 B7 -38.2(3) . . . . ?
B9 B4 B8 B7 100.0(3) . . . . ?
B5 B4 B8 B7 62.9(4) . . . . ?
C1 B4 B8 B9 -97.3(3) . . . . ?
B3 B4 B8 B9 -138.1(3) . . . . ?
B5 B4 B8 B9 -37.0(3) . . . . ?
C1 B4 B8 B12 -60.1(4) . . . . ?
B3 B4 B8 B12 -100.9(3) . . . . ?
B9 B4 B8 B12 37.2(3) . . . . ?
B5 B4 B8 B12 0.1(4) . . . . ?
C2 B7 B8 B3 -40.9(3) . . . . ?
B12 B7 B8 B3 -138.6(3) . . . . ?
B11 B7 B8 B3 -101.6(3) . . . . ?
C2 B7 B8 Cl8 -154.0(3) . . . . ?
B12 B7 B8 Cl8 108.4(3) . . . . ?
B3 B7 B8 Cl8 -113.1(4) . . . . ?
B11 B7 B8 Cl8 145.3(3) . . . . ?
C2 B7 B8 B4 -2.6(4) . . . . ?
B12 B7 B8 B4 -100.3(3) . . . . ?
B3 B7 B8 B4 38.3(3) . . . . ?
B11 B7 B8 B4 -63.3(4) . . . . ?
C2 B7 B8 B9 60.6(4) . . . . ?
B12 B7 B8 B9 -37.1(3) . . . . ?
B3 B7 B8 B9 101.5(3) . . . . ?
B11 B7 B8 B9 -0.1(4) . . . . ?
C2 B7 B8 B12 97.7(3) . . . . ?
B3 B7 B8 B12 138.6(3) . . . . ?
B11 B7 B8 B12 37.0(3) . . . . ?
C1 B5 B9 B12 -61.0(4) . . . . ?
B6 B5 B9 B12 1.1(4) . . . . ?
B10 B5 B9 B12 38.0(3) . . . . ?
B4 B5 B9 B12 -100.9(3) . . . . ?
C1 B5 B9 B4 39.9(3) . . . . ?
B6 B5 B9 B4 102.0(3) . . . . ?
B10 B5 B9 B4 138.9(3) . . . . ?
C1 B5 B9 B8 2.7(4) . . . . ?
B6 B5 B9 B8 64.8(4) . . . . ?
B10 B5 B9 B8 101.7(3) . . . . ?
B4 B5 B9 B8 -37.2(3) . . . . ?
C1 B5 B9 Cl9 151.0(3) . . . . ?
B6 B5 B9 Cl9 -146.9(3) . . . . ?
B10 B5 B9 Cl9 -110.0(4) . . . . ?
B4 B5 B9 Cl9 111.1(4) . . . . ?
C1 B5 B9 B10 -99.0(3) . . . . ?
B6 B5 B9 B10 -36.9(3) . . . . ?
B4 B5 B9 B10 -138.9(3) . . . . ?
C1 B4 B9 B5 -39.6(3) . . . . ?
B8 B4 B9 B5 -138.3(3) . . . . ?
B3 B4 B9 B5 -101.2(4) . . . . ?
C1 B4 B9 B12 61.1(4) . . . . ?
B8 B4 B9 B12 -37.5(3) . . . . ?
B3 B4 B9 B12 -0.5(4) . . . . ?
B5 B4 B9 B12 100.7(3) . . . . ?
C1 B4 B9 B8 98.7(3) . . . . ?
B3 B4 B9 B8 37.1(3) . . . . ?
B5 B4 B9 B8 138.3(3) . . . . ?
C1 B4 B9 Cl9 -151.1(3) . . . . ?
B8 B4 B9 Cl9 110.2(4) . . . . ?
B3 B4 B9 Cl9 147.3(3) . . . . ?
B5 B4 B9 Cl9 -111.5(4) . . . . ?
C1 B4 B9 B10 -2.7(4) . . . . ?
B8 B4 B9 B10 -101.4(3) . . . . ?
B3 B4 B9 B10 -64.3(4) . . . . ?
B5 B4 B9 B10 36.9(3) . . . . ?
B3 B8 B9 B5 -0.2(4) . . . . ?
Cl8 B8 B9 B5 150.0(3) . . . . ?
B4 B8 B9 B5 37.5(3) . . . . ?
B7 B8 B9 B5 -63.6(4) . . . . ?
B12 B8 B9 B5 -100.7(3) . . . . ?
B3 B8 B9 B12 100.5(3) . . . . ?
Cl8 B8 B9 B12 -109.4(3) . . . . ?
B4 B8 B9 B12 138.1(3) . . . . ?
B7 B8 B9 B12 37.0(3) . . . . ?
B3 B8 B9 B4 -37.6(3) . . . . ?
Cl8 B8 B9 B4 112.5(3) . . . . ?
B7 B8 B9 B4 -101.1(3) . . . . ?
B12 B8 B9 B4 -138.1(3) . . . . ?
B3 B8 B9 Cl9 -148.8(3) . . . . ?
Cl8 B8 B9 Cl9 1.4(5) . . . . ?
B4 B8 B9 Cl9 -111.2(3) . . . . ?
B7 B8 B9 Cl9 147.7(3) . . . . ?
B12 B8 B9 Cl9 110.7(3) . . . . ?
B3 B8 B9 B10 63.4(4) . . . . ?
Cl8 B8 B9 B10 -146.4(3) . . . . ?
B4 B8 B9 B10 101.1(3) . . . . ?
B7 B8 B9 B10 0.0(4) . . . . ?
B12 B8 B9 B10 -37.1(3) . . . . ?
C1 B6 B10 Cl10 142.2(5) . . . . ?
C2 B6 B10 Cl10 -159.3(5) . . . . ?
B11 B6 B10 Cl10 -120.1(6) . . . . ?
B5 B6 B10 Cl10 103.0(5) . . . . ?
C1 B6 B10 B11 -97.7(3) . . . . ?
C2 B6 B10 B11 -39.3(3) . . . . ?
B5 B6 B10 B11 -136.9(3) . . . . ?
C1 B6 B10 B5 39.2(3) . . . . ?
C2 B6 B10 B5 97.7(3) . . . . ?
B11 B6 B10 B5 136.9(3) . . . . ?
C1 B6 B10 B9 2.2(4) . . . . ?
C2 B6 B10 B9 60.7(4) . . . . ?
B11 B6 B10 B9 99.9(3) . . . . ?
B5 B6 B10 B9 -37.0(3) . . . . ?
C1 B6 B10 B12 -60.5(4) . . . . ?
C2 B6 B10 B12 -2.1(4) . . . . ?
B11 B6 B10 B12 37.2(3) . . . . ?
B5 B6 B10 B12 -99.7(3) . . . . ?
C1 B5 B10 Cl10 -160.0(4) . . . . ?
B6 B5 B10 Cl10 -119.8(5) . . . . ?
B9 B5 B10 Cl10 102.0(4) . . . . ?
B4 B5 B10 Cl10 139.1(4) . . . . ?
C1 B5 B10 B6 -40.2(3) . . . . ?
B9 B5 B10 B6 -138.2(3) . . . . ?
B4 B5 B10 B6 -101.1(3) . . . . ?
C1 B5 B10 B11 -1.8(4) . . . . ?
B6 B5 B10 B11 38.4(3) . . . . ?
B9 B5 B10 B11 -99.8(3) . . . . ?
B4 B5 B10 B11 -62.7(4) . . . . ?
C1 B5 B10 B9 98.0(3) . . . . ?
B6 B5 B10 B9 138.2(3) . . . . ?
B4 B5 B10 B9 37.1(3) . . . . ?
C1 B5 B10 B12 60.5(4) . . . . ?
B6 B5 B10 B12 100.8(3) . . . . ?
B9 B5 B10 B12 -37.4(3) . . . . ?
B4 B5 B10 B12 -0.3(4) . . . . ?
B5 B9 B10 Cl10 -109.1(4) . . . . ?
B12 B9 B10 Cl10 113.4(4) . . . . ?
B4 B9 B10 Cl10 -146.1(4) . . . . ?
B8 B9 B10 Cl10 150.4(4) . . . . ?
Cl9 B9 B10 Cl10 2.6(5) . . . . ?
B5 B9 B10 B6 37.3(3) . . . . ?
B12 B9 B10 B6 -100.2(3) . . . . ?
B4 B9 B10 B6 0.3(4) . . . . ?
B8 B9 B10 B6 -63.2(4) . . . . ?
Cl9 B9 B10 B6 149.0(3) . . . . ?
B5 B9 B10 B11 100.7(3) . . . . ?
B12 B9 B10 B11 -36.9(3) . . . . ?
B4 B9 B10 B11 63.7(4) . . . . ?
B8 B9 B10 B11 0.2(4) . . . . ?
Cl9 B9 B10 B11 -147.7(3) . . . . ?
B12 B9 B10 B5 -137.5(3) . . . . ?
B4 B9 B10 B5 -37.0(3) . . . . ?
B8 B9 B10 B5 -100.5(3) . . . . ?
Cl9 B9 B10 B5 111.7(3) . . . . ?
B5 B9 B10 B12 137.5(3) . . . . ?
B4 B9 B10 B12 100.5(3) . . . . ?
B8 B9 B10 B12 37.0(3) . . . . ?
Cl9 B9 B10 B12 -110.8(3) . . . . ?
C1 C2 B11 B12 -64.2(4) . . . . ?
B7 C2 B11 B12 40.2(3) . . . . ?
B6 C2 B11 B12 -103.1(3) . . . . ?
B3 C2 B11 B12 3.8(4) . . . . ?
C1 C2 B11 B6 38.8(3) . . . . ?
B7 C2 B11 B6 143.3(3) . . . . ?
B3 C2 B11 B6 106.9(4) . . . . ?
C1 C2 B11 B10 -1.2(4) . . . . ?
B7 C2 B11 B10 103.2(3) . . . . ?
B6 C2 B11 B10 -40.1(3) . . . . ?
B3 C2 B11 B10 66.8(4) . . . . ?
C1 C2 B11 B7 -104.5(3) . . . . ?
B6 C2 B11 B7 -143.3(3) . . . . ?
B3 C2 B11 B7 -36.5(3) . . . . ?
C1 B6 B11 C2 -34.6(3) . . . . ?
B10 B6 B11 C2 -133.6(3) . . . . ?
B5 B6 B11 C2 -94.6(3) . . . . ?
C1 B6 B11 B12 60.9(4) . . . . ?
C2 B6 B11 B12 95.5(3) . . . . ?
B10 B6 B11 B12 -38.0(3) . . . . ?
B5 B6 B11 B12 0.9(4) . . . . ?
C1 B6 B11 B10 98.9(3) . . . . ?
C2 B6 B11 B10 133.6(3) . . . . ?
B5 B6 B11 B10 38.9(3) . . . . ?
C1 B6 B11 B7 -2.5(4) . . . . ?
C2 B6 B11 B7 32.2(3) . . . . ?
B10 B6 B11 B7 -101.4(3) . . . . ?
B5 B6 B11 B7 -62.5(4) . . . . ?
Cl10 B10 B11 C2 156.2(5) . . . . ?
B6 B10 B11 C2 40.3(3) . . . . ?
B5 B10 B11 C2 1.9(4) . . . . ?
B9 B10 B11 C2 -60.6(4) . . . . ?
B12 B10 B11 C2 -97.6(3) . . . . ?
Cl10 B10 B11 B12 -106.2(5) . . . . ?
B6 B10 B11 B12 137.9(3) . . . . ?
B5 B10 B11 B12 99.5(3) . . . . ?
B9 B10 B11 B12 37.0(3) . . . . ?
Cl10 B10 B11 B6 115.9(5) . . . . ?
B5 B10 B11 B6 -38.4(3) . . . . ?
B9 B10 B11 B6 -100.9(3) . . . . ?
B12 B10 B11 B6 -137.9(3) . . . . ?
Cl10 B10 B11 B7 -143.4(5) . . . . ?
B6 B10 B11 B7 100.7(4) . . . . ?
B5 B10 B11 B7 62.3(4) . . . . ?
B9 B10 B11 B7 -0.2(4) . . . . ?
B12 B10 B11 B7 -37.2(3) . . . . ?
B12 B7 B11 C2 133.4(3) . . . . ?
B3 B7 B11 C2 33.0(3) . . . . ?
B8 B7 B11 C2 96.0(3) . . . . ?
C2 B7 B11 B12 -133.4(3) . . . . ?
B3 B7 B11 B12 -100.4(3) . . . . ?
B8 B7 B11 B12 -37.4(3) . . . . ?
C2 B7 B11 B6 -32.9(3) . . . . ?
B12 B7 B11 B6 100.5(3) . . . . ?
B3 B7 B11 B6 0.1(4) . . . . ?
B8 B7 B11 B6 63.1(4) . . . . ?
C2 B7 B11 B10 -95.8(3) . . . . ?
B12 B7 B11 B10 37.7(3) . . . . ?
B3 B7 B11 B10 -62.7(4) . . . . ?
B8 B7 B11 B10 0.2(4) . . . . ?
C2 B11 B12 B7 -39.2(3) . . . . ?
B6 B11 B12 B7 -101.3(3) . . . . ?
B10 B11 B12 B7 -138.6(3) . . . . ?
C2 B11 B12 B9 61.9(4) . . . . ?
B6 B11 B12 B9 -0.2(4) . . . . ?
B10 B11 B12 B9 -37.5(3) . . . . ?
B7 B11 B12 B9 101.1(3) . . . . ?
C2 B11 B12 Cl12 -149.2(3) . . . . ?
B6 B11 B12 Cl12 148.6(3) . . . . ?
B10 B11 B12 Cl12 111.4(4) . . . . ?
B7 B11 B12 Cl12 -110.1(4) . . . . ?
C2 B11 B12 B8 -1.8(4) . . . . ?
B6 B11 B12 B8 -63.9(4) . . . . ?
B10 B11 B12 B8 -101.2(3) . . . . ?
B7 B11 B12 B8 37.4(3) . . . . ?
C2 B11 B12 B10 99.4(3) . . . . ?
B6 B11 B12 B10 37.3(3) . . . . ?
B7 B11 B12 B10 138.6(3) . . . . ?
C2 B7 B12 B11 39.4(3) . . . . ?
B3 B7 B12 B11 101.6(3) . . . . ?
B8 B7 B12 B11 138.4(3) . . . . ?
C2 B7 B12 B9 -61.5(4) . . . . ?
B3 B7 B12 B9 0.7(4) . . . . ?
B8 B7 B12 B9 37.5(3) . . . . ?
B11 B7 B12 B9 -100.9(3) . . . . ?
C2 B7 B12 Cl12 151.3(3) . . . . ?
B3 B7 B12 Cl12 -146.5(3) . . . . ?
B8 B7 B12 Cl12 -109.7(3) . . . . ?
B11 B7 B12 Cl12 111.9(3) . . . . ?
C2 B7 B12 B8 -99.0(3) . . . . ?
B3 B7 B12 B8 -36.8(3) . . . . ?
B11 B7 B12 B8 -138.4(3) . . . . ?
C2 B7 B12 B10 2.3(4) . . . . ?
B3 B7 B12 B10 64.5(4) . . . . ?
B8 B7 B12 B10 101.3(3) . . . . ?
B11 B7 B12 B10 -37.1(3) . . . . ?
B5 B9 B12 B11 -0.6(4) . . . . ?
B4 B9 B12 B11 -64.3(4) . . . . ?
B8 B9 B12 B11 -101.6(3) . . . . ?
Cl9 B9 B12 B11 147.8(3) . . . . ?
B10 B9 B12 B11 37.3(3) . . . . ?
B5 B9 B12 B7 63.6(4) . . . . ?
B4 B9 B12 B7 -0.1(4) . . . . ?
B8 B9 B12 B7 -37.5(3) . . . . ?
Cl9 B9 B12 B7 -148.1(3) . . . . ?
B10 B9 B12 B7 101.5(3) . . . . ?
B5 B9 B12 Cl12 -149.5(3) . . . . ?
B4 B9 B12 Cl12 146.7(3) . . . . ?
B8 B9 B12 Cl12 109.4(4) . . . . ?
Cl9 B9 B12 Cl12 -1.2(5) . . . . ?
B10 B9 B12 Cl12 -111.6(4) . . . . ?
B5 B9 B12 B8 101.0(3) . . . . ?
B4 B9 B12 B8 37.3(3) . . . . ?
Cl9 B9 B12 B8 -110.6(4) . . . . ?
B10 B9 B12 B8 138.9(3) . . . . ?
B5 B9 B12 B10 -37.9(3) . . . . ?
B4 B9 B12 B10 -101.6(3) . . . . ?
B8 B9 B12 B10 -138.9(3) . . . . ?
Cl9 B9 B12 B10 110.4(4) . . . . ?
B3 B8 B12 B11 -0.6(4) . . . . ?
Cl8 B8 B12 B11 -149.9(3) . . . . ?
B4 B8 B12 B11 63.1(4) . . . . ?
B7 B8 B12 B11 -37.6(3) . . . . ?
B9 B8 B12 B11 100.5(3) . . . . ?
B3 B8 B12 B7 37.1(3) . . . . ?
Cl8 B8 B12 B7 -112.3(3) . . . . ?
B4 B8 B12 B7 100.8(3) . . . . ?
B9 B8 B12 B7 138.1(3) . . . . ?
B3 B8 B12 B9 -101.0(3) . . . . ?
Cl8 B8 B12 B9 109.6(3) . . . . ?
B4 B8 B12 B9 -37.3(3) . . . . ?
B7 B8 B12 B9 -138.1(3) . . . . ?
B3 B8 B12 Cl12 147.5(3) . . . . ?
Cl8 B8 B12 Cl12 -1.9(5) . . . . ?
B4 B8 B12 Cl12 -148.8(3) . . . . ?
B7 B8 B12 Cl12 110.4(3) . . . . ?
B9 B8 B12 Cl12 -111.5(3) . . . . ?
B3 B8 B12 B10 -64.1(4) . . . . ?
Cl8 B8 B12 B10 146.6(3) . . . . ?
B4 B8 B12 B10 -0.4(4) . . . . ?
B7 B8 B12 B10 -101.2(3) . . . . ?
B9 B8 B12 B10 37.0(3) . . . . ?
Cl10 B10 B12 B11 121.5(5) . . . . ?
B6 B10 B12 B11 -37.6(3) . . . . ?
B5 B10 B12 B11 -100.8(3) . . . . ?
B9 B10 B12 B11 -138.2(3) . . . . ?
Cl10 B10 B12 B7 159.0(4) . . . . ?
B6 B10 B12 B7 -0.1(4) . . . . ?
B11 B10 B12 B7 37.5(3) . . . . ?
B5 B10 B12 B7 -63.3(4) . . . . ?
B9 B10 B12 B7 -100.7(3) . . . . ?
Cl10 B10 B12 B9 -100.3(5) . . . . ?
B6 B10 B12 B9 100.6(3) . . . . ?
B11 B10 B12 B9 138.2(3) . . . . ?
B5 B10 B12 B9 37.4(3) . . . . ?
Cl10 B10 B12 Cl12 10.5(6) . . . . ?
B6 B10 B12 Cl12 -148.6(3) . . . . ?
B11 B10 B12 Cl12 -111.0(4) . . . . ?
B5 B10 B12 Cl12 148.2(3) . . . . ?
B9 B10 B12 Cl12 110.8(3) . . . . ?
Cl10 B10 B12 B8 -137.2(5) . . . . ?
B6 B10 B12 B8 63.7(4) . . . . ?
B11 B10 B12 B8 101.2(3) . . . . ?
B5 B10 B12 B8 0.4(4) . . . . ?
B9 B10 B12 B8 -36.9(3) . . . . ?
 
_refine_diff_density_max    0.266
_refine_diff_density_min   -0.269
_refine_diff_density_rms    0.054

_shelxl_version_number 2014/6

_shelx_res_file
;
TITL siv72 in Cc
CELL 0.71073  12.58450   7.05190  13.82630  90.0000 113.0975  90.0000
ZERR    4.00   0.00090   0.00050   0.00100   0.0000   0.0025   0.0000
LATT -7
SYMM X, -Y, 0.5+Z
SFAC C H B CL
UNIT 8 36 40 12
TEMP -153.150

ACTA
CONF
HTAB

L.S. 6
BOND $H
FMAP 2
PLAN 10

WGHT    0.033700    0.609300
FVAR       0.21610   0.83996
CL9   4    1.224231    0.512483    1.013821    11.00000    0.02242    0.01908 =
         0.01744   -0.00392    0.00258   -0.00587
CL12  4    0.983559    0.190717    0.978491    11.00000    0.03423    0.02329 =
         0.02050   -0.00007    0.01537   -0.00692
PART   1
CL8   4    1.225181    0.031363    0.923070    21.00000    0.02033    0.01374 =
         0.01843   -0.00029    0.00041    0.00380
PART   2
CL10  4    0.952503    0.688249    0.905421   -21.00000    0.04104    0.03547 =
         0.03362    0.01188    0.01966    0.02184
PART   0
C1    1    1.056576    0.444633    0.672430    11.00000    0.02274    0.01947 =
         0.01465    0.00291    0.00875   -0.00012
C2    1    0.948736    0.303310    0.657346    11.00000    0.01915    0.01826 =
         0.01598    0.00109    0.00268   -0.00329
B3    3    1.086175    0.208273    0.702215    11.00000    0.02125    0.01621 =
         0.02044   -0.00245    0.00961   -0.00106
B4    3    1.174345    0.393091    0.782013    11.00000    0.01870    0.01827 =
         0.02038    0.00234    0.00803   -0.00037
B5    3    1.083951    0.592613    0.775184    11.00000    0.02206    0.01301 =
         0.01835   -0.00006    0.00938   -0.00309
B6    3    0.939590    0.535543    0.691997    11.00000    0.01908    0.01478 =
         0.02317    0.00254    0.00518    0.00119
B7    3    0.983055    0.143167    0.755053    11.00000    0.01644    0.01504 =
         0.01751    0.00008    0.00522   -0.00143
B8    3    1.127961    0.201283    0.840052    11.00000    0.01824    0.01378 =
         0.01669   -0.00079    0.00618   -0.00208
AFIX   3
PART   2
H8    2    1.189371    0.093993    0.892371   -21.00000   -1.20000
AFIX   0
PART   0
B9    3    1.126420    0.438962    0.885515    11.00000    0.02042    0.01427 =
         0.01487   -0.00048    0.00623   -0.00604
B10   3    0.981136    0.527846    0.828818    11.00000    0.02425    0.01313 =
         0.02048   -0.00143    0.01044   -0.00181
AFIX   3
PART   1
H10   2    0.962536    0.634996    0.879908    21.00000   -1.20000
AFIX   0
PART   0
B11   3    0.893593    0.343942    0.748862    11.00000    0.01538    0.01741 =
         0.02199    0.00135    0.00528   -0.00110
B12   3    1.008414    0.283880    0.868516    11.00000    0.01791    0.01463 =
         0.01607    0.00071    0.00708   -0.00517
H1    2    1.061053    0.471543    0.612113    11.00000    0.01052
H2    2    0.906134    0.269546    0.590211    11.00000    0.03258
H3    2    1.110386    0.118112    0.653547    11.00000    0.02045
H4    2    1.262017    0.407575    0.792006    11.00000    0.01800
H5    2    1.117499    0.716918    0.771041    11.00000    0.04474
H6    2    0.881949    0.618825    0.630753    11.00000    0.03520
H7    2    0.947765    0.007211    0.744331    11.00000    0.02378
H11   2    0.807282    0.328164    0.729582    11.00000    0.01456

HKLF 4

REM  siv72 in Cc
REM R1 =  0.0296 for    2116 Fo > 4sig(Fo)  and  0.0314 for all    2197 data
REM    178 parameters refined using      2 restraints

END

WGHT      0.0337      0.6093

REM No hydrogen bonds found for HTAB generation

REM Highest difference peak  0.266,  deepest hole -0.269,  1-sigma level  0.054
Q1    1   1.2656  0.4652  0.9747  11.00000  0.05    0.27
Q2    1   1.1895 -0.0254  0.9553  11.00000  0.05    0.25
Q3    1   1.1840  0.5036  0.9362  11.00000  0.05    0.24
Q4    1   0.9573  0.5336  0.7634  11.00000  0.05    0.22
Q5    1   1.0262  0.2023  1.0638  11.00000  0.05    0.21
Q6    1   1.2970  0.5192  1.0020  11.00000  0.05    0.21
Q7    1   1.1615  0.0366  0.9353  11.00000  0.05    0.21
Q8    1   1.0808  0.1941  0.7799  11.00000  0.05    0.20
Q9    1   1.0522  0.2323  0.9694  11.00000  0.05    0.20
Q10   1   1.2599  0.0400  1.0065  11.00000  0.05    0.20
;
_shelx_res_checksum   28126

_shelx_hkl_file
;
   2   0   0  399.22    8.53
  -2   0   0  391.20    8.39
   2   0   0  392.28    8.38
  -2   0   0  398.12    8.51
   4   0   0  946.09   19.86
  -4   0   0  932.90   19.86
  -4   0   0  938.30   20.08
   4   0   0  951.39   20.15
  -6   0   0   28.71    1.47
   6   0   0   30.77    1.66
   8   0   0  344.46    8.99
  -8   0   0  348.18    8.53
  10   0   0   16.80    1.74
 -10   0   0   18.07    1.60
 -12   0   0  119.52    4.43
  12   0   0  117.58    4.96
 -14   0   0   22.29    2.32
  14   0   0   22.64    2.41
  -1  -1   0  268.25    5.71
  -1  -1   0  253.01    5.44
  -1  -1   0  252.43    5.48
   1  -1   0  253.23    5.46
   1  -1   0  260.71    5.67
   1  -1   0  267.21    5.51
  -1   1   0  254.14    5.49
   1   1   0  250.71    5.48
   1   1   0  270.48    5.72
  -1   1   0  249.89    5.45
  -1   1   0  263.71    5.67
  -3  -1   0   14.55    0.85
   3  -1   0   15.89    0.74
   3  -1   0   15.74    0.88
  -3  -1   0   14.15    0.76
   3   1   0   13.74    0.71
  -3   1   0   13.81    0.53
  -3   1   0   14.56    0.84
   3   1   0   14.89    0.91
  -3   1   0   14.07    0.74
   5  -1   0   16.79    1.02
  -5  -1   0   16.63    1.14
   5  -1   0   17.69    1.21
  -5  -1   0   16.58    1.10
  -5   1   0   17.59    1.12
   5   1   0   15.92    0.99
   5   1   0   17.52    1.24
  -5   1   0   16.62    1.06
   7  -1   0   38.76    2.00
  -7  -1   0   35.91    1.75
  -7   1   0   37.15    1.72
   7   1   0   37.44    2.01
  -9  -1   0   10.07    1.21
   9  -1   0    9.33    1.50
   9   1   0    9.45    1.30
  -9   1   0    9.09    1.10
 -11  -1   0    4.63    1.14
  11  -1   0    4.15    1.17
 -11   1   0    3.15    1.06
  11   1   0    5.70    1.42
 -13  -1   0    1.27    1.11
  13  -1   0   -0.33    1.04
 -13   1   0    1.01    1.06
  13   1   0    1.85    1.32
   0  -2   0  133.59    3.17
   0  -2   0  133.36    3.36
   0   2   0  126.94    3.13
   0   2   0  133.68    3.35
   2  -2   0  831.54   17.02
  -2  -2   0  798.74   16.88
  -2  -2   0  791.98   16.93
  -2  -2   0  818.19   17.42
   2  -2   0  822.25   16.94
  -2  -2   0  804.33   16.99
  -2   2   0  840.98   17.02
  -2   2   0  825.37   17.35
   2   2   0  807.03   16.99
  -2   2   0  802.63   16.92
  -4  -2   0   97.98    2.55
  -4  -2   0  102.45    2.88
   4  -2   0  107.20    2.61
   4  -2   0  103.72    3.13
   4  -2   0  104.97    2.82
  -4  -2   0  100.22    3.17
  -4  -2   0  100.64    2.74
  -4   2   0  102.20    2.81
   4   2   0   99.71    2.55
   4   2   0  106.33    3.27
  -4   2   0  104.77    2.59
  -4   2   0  106.73    3.12
  -6  -2   0  349.71    8.33
   6  -2   0  355.75    8.76
  -6   2   0  356.12    8.31
   6   2   0  352.19    8.92
   8  -2   0   49.07    2.46
  -8   2   0   45.98    2.11
   8   2   0   48.42    2.50
  10  -2   0  108.30    4.32
 -10  -2   0  108.34    3.91
  10   2   0  103.79    4.38
 -10   2   0  110.82    3.86
 -12  -2   0   36.59    2.45
 -12   2   0   33.37    2.38
  -1  -3   0  158.53    4.01
  -1  -3   0  164.47    4.39
   1  -3   0  162.37    4.02
   1  -3   0  167.65    4.39
  -1   3   0  159.77    4.28
   1   3   0  165.64    4.04
  -1   3   0  162.14    4.03
   3  -3   0   70.54    2.05
  -3  -3   0   62.76    2.36
  -3  -3   0   63.53    2.12
   3  -3   0   69.61    2.44
  -3  -3   0   65.29    1.87
   3  -3   0   65.85    1.92
  -3  -3   0   63.10    1.98
  -3   3   0   62.70    2.28
   3   3   0   65.06    2.00
  -3   3   0   65.14    2.00
  -3   3   0   62.66    2.01
   5  -3   0   42.60    1.67
  -5  -3   0   40.36    1.45
   5  -3   0   42.30    1.51
  -5  -3   0   41.17    1.60
  -5  -3   0   43.87    1.78
   5  -3   0   46.18    2.07
   5   3   0   40.90    1.51
  -5   3   0   42.75    1.54
  -5   3   0   44.55    1.68
   5   3   0   45.38    2.18
   7  -3   0   64.23    3.27
   7  -3   0   60.48    1.91
  -7  -3   0   59.57    2.40
   7   3   0   62.89    3.57
  -7   3   0   61.01    2.34
  -7   3   0   60.09    1.92
   9  -3   0   31.19    2.12
  -9  -3   0   30.73    1.88
  -9   3   0   33.70    1.87
   9   3   0   31.90    2.29
 -11  -3   0    8.35    1.52
  11  -3   0    7.34    1.64
 -11   3   0    9.84    1.39
  11   3   0    6.11    1.50
  13  -3   0   20.37    2.53
 -13  -3   0   26.26    2.35
 -13   3   0   28.33    2.27
  13   3   0   23.13    2.68
   0  -4   0  190.71    5.20
   0   4   0  190.01    4.81
  -2  -4   0   65.88    2.58
   2  -4   0   64.48    2.56
   2   4   0   64.56    2.17
  -2   4   0   65.78    2.19
  -4  -4   0  141.85    3.67
   4  -4   0  146.18    4.48
  -4  -4   0  147.10    4.61
   4  -4   0  145.82    3.77
  -4  -4   0  139.97    3.81
  -4   4   0  152.41    3.93
   4   4   0  145.04    3.89
  -4   4   0  146.04    3.76
  -6  -4   0   55.94    2.24
   6  -4   0   56.03    2.60
  -6   4   0   53.04    2.02
  -6   4   0   58.07    2.03
   6   4   0   56.38    2.81
   6   4   0   57.07    1.97
   8  -4   0   80.71    3.54
  -8  -4   0   80.45    3.07
   8   4   0   78.74    2.49
  -8   4   0   79.97    2.90
  -8   4   0   82.54    2.57
   8   4   0   79.41    3.69
  10  -4   0   63.87    3.38
 -10  -4   0   68.49    3.10
 -10   4   0   65.13    2.80
  10   4   0   64.05    3.55
  12  -4   0   22.47    2.40
 -12  -4   0   28.06    2.38
 -12   4   0   25.88    2.08
  12   4   0   22.28    2.63
  -1  -5   0   21.07    1.55
   1  -5   0   23.72    1.60
   1   5   0   22.85    1.57
  -3  -5   0   37.28    2.74
   3  -5   0   43.93    2.88
   3   5   0   39.59    2.04
  -3   5   0   36.87    2.59
   5  -5   0    7.38    1.33
  -5  -5   0    7.51    1.33
  -5  -5   0    6.55    0.97
  -5   5   0    7.71    0.95
  -7  -5   0   16.35    1.70
   7  -5   0   19.20    1.77
  -7   5   0   19.94    1.25
  -7   5   0   17.58    1.27
   9  -5   0   16.20    1.88
  -9  -5   0   13.57    1.59
   9   5   0   11.71    1.33
   9   5   0   12.99    2.01
  -9   5   0   10.82    1.24
  -9   5   0   13.43    1.12
  11  -5   0   23.39    2.37
 -11  -5   0   17.83    2.22
 -11   5   0   21.10    1.83
  11   5   0   19.18    2.46
   0  -6   0  110.98    4.06
   0   6   0  104.65    3.54
   2  -6   0   11.60    1.39
  -2  -6   0   11.92    1.40
   2   6   0   10.65    1.23
  -2   6   0   10.63    1.16
  -4  -6   0  126.78    4.73
   4  -6   0  131.58    4.69
  -4   6   0  131.62    4.05
   4   6   0  128.06    4.02
  -6  -6   0    4.82    1.36
   6  -6   0    7.98    1.55
  -6   6   0    8.48    1.09
   6   6   0    7.22    1.05
   8  -6   0   52.48    3.32
  -8  -6   0   53.05    3.61
  -8  -6   0   52.86    2.54
   8   6   0   50.03    2.22
  -8   6   0   50.10    2.27
  -8   6   0   50.36    2.33
  10  -6   0    9.94    2.00
 -10  -6   0    7.80    2.04
 -10  -6   0    7.77    1.63
 -10   6   0    9.96    1.24
 -10   6   0    6.74    1.36
   1  -7   0    6.92    1.36
  -1  -7   0    5.38    1.20
  -1   7   0    6.16    1.18
   1   7   0    6.10    1.14
  -3  -7   0   22.20    2.01
   3  -7   0   14.89    1.87
  -3   7   0   16.17    1.55
   3   7   0   18.25    1.57
  -5  -7   0    3.58    1.19
   5  -7   0    2.32    1.02
   5   7   0    3.39    1.00
  -5   7   0    3.49    1.00
  -7  -7   0    7.15    1.70
   7  -7   0    6.23    1.55
   7   7   0    4.08    1.23
  -7   7   0    6.64    1.17
   0   8   0   12.30    1.58
  -2  -8   0   55.50    3.39
   2  -8   0   58.99    3.67
   2   8   0   54.51    2.81
  -2   8   0   57.13    2.78
  -4  -8   0    4.38    1.47
   4  -8   0   -0.34    1.23
  -4   8   0    1.67    1.10
   4   8   0    2.84    1.15
 -14   0   1    0.94    1.13
  14   0  -1    0.14    1.15
 -12   0   1    0.74    0.99
  12   0  -1    0.98    0.88
 -10   0   1    0.76    0.75
  10   0  -1    0.64    0.69
   8   0  -1    0.29    0.59
  -8   0   1    0.10    0.42
   6   0  -1   -0.03    0.46
  -6   0   1   -0.41    0.44
   6   0  -1    0.12    0.45
  -6   0   1    0.15    0.40
   4   0  -1    1.08    0.34
  -4   0   1    0.69    0.37
  -4   0   1    0.80    0.41
   4   0  -1    0.29    0.57
  -2   0   1    0.45    0.23
  -2   0   1    0.68    0.24
   2   0  -1    0.47    0.22
  -2   0   1    0.31    0.19
   0   0  -1   -0.02    0.04
   2   0   1    0.84    0.33
  -2   0  -1    0.27    0.27
  -2   0  -1    0.54    0.29
   2   0   1    0.92    0.27
  -4   0  -1    0.65    0.39
   4   0   1    0.31    0.40
  -4   0  -1    0.09    0.33
  -6   0  -1    1.24    0.49
   6   0   1    0.89    0.47
   8   0   1    2.05    0.81
  -8   0  -1    1.27    0.66
 -10   0  -1    1.01    0.76
  10   0   1    0.17    0.68
 -13  -1   1   16.20    1.84
  13  -1  -1   15.29    2.07
  13   1  -1   13.49    2.19
 -13   1   1   13.74    1.76
 -11  -1   1   12.71    1.49
  11  -1  -1   12.08    1.61
 -11   1   1   13.26    1.55
  11   1  -1   12.94    1.75
  -9  -1   1   29.80    1.78
   9  -1  -1   28.98    2.01
   9   1  -1   31.77    1.99
  -9   1   1   30.22    1.70
  -7  -1   1   75.34    2.64
   7  -1  -1   75.90    2.92
   7   1  -1   75.26    2.93
  -7   1   1   75.88    2.62
   5  -1  -1  125.15    3.30
   5  -1  -1  124.28    3.64
  -5  -1   1  122.50    3.59
  -5  -1   1  127.96    3.43
  -5   1   1  125.43    3.37
  -5   1   1  120.42    3.54
   5   1  -1  125.56    3.66
  -3  -1   1   73.59    1.75
  -3  -1   1   74.78    2.14
   3  -1  -1   73.93    1.94
  -3  -1   1   68.39    1.97
   3  -1  -1   74.23    2.16
  -3  -1   1   71.59    1.94
   3  -1  -1   73.43    1.78
  -3   1   1   74.59    2.15
  -3   1   1   73.53    1.96
  -3   1   1   73.04    1.77
   3   1  -1   73.80    2.16
   1  -1  -1  464.96    9.70
  -1  -1   1  442.01    9.48
  -1  -1   1  462.21    9.58
   1  -1  -1  465.69    9.53
  -1  -1   1  444.24    9.50
  -1   1   1  464.96    9.53
   1   1  -1  445.60    9.50
  -1   1   1  452.89    9.68
   1   1  -1  455.16    9.49
   1  -1   1  410.44    8.73
   1  -1   1  422.42    8.61
  -1  -1  -1  413.96    8.89
   1  -1   1  405.28    8.67
  -1  -1  -1  399.19    8.60
  -1  -1  -1  417.90    8.60
   1   1   1  403.88    8.58
  -1   1  -1  414.38    8.73
  -1   1  -1  425.43    8.61
  -1   1  -1  403.70    8.67
   1   1   1  397.21    8.59
   1   1   1  410.48    8.91
  -3  -1  -1   41.59    1.60
   3  -1   1   38.71    1.37
  -3  -1  -1   40.82    1.41
   3   1   1   39.28    1.36
  -3   1  -1   42.62    1.52
   3   1   1   44.61    1.69
  -5  -1  -1   42.34    2.02
   5  -1   1   44.23    1.94
  -5  -1  -1   43.65    1.77
   5  -1   1   40.24    1.66
  -5   1  -1   42.80    1.82
  -5   1  -1   44.91    1.76
   5   1   1   43.95    2.00
   5   1   1   44.05    1.68
  -7  -1  -1   59.46    2.33
   7  -1   1   60.06    2.63
   7   1   1   58.11    2.66
  -7   1  -1   61.22    2.36
   9  -1   1   33.94    2.13
  -9  -1  -1   33.55    1.93
  -9   1  -1   35.07    1.95
   9   1   1   33.85    2.25
 -11  -1  -1    7.36    1.31
  11  -1   1    6.73    1.47
  11   1   1    7.07    1.53
 -11   1  -1   10.22    1.46
  13  -1   1    6.54    1.73
 -13  -1  -1    6.27    1.42
  13   1   1    5.64    1.67
 -13   1  -1    7.60    1.38
  14  -2  -1    3.54    1.46
 -14  -2   1    2.46    1.32
 -14   2   1    3.08    1.37
  14   2  -1    3.85    1.49
 -12  -2   1   11.12    1.70
  12  -2  -1   11.95    1.96
  12   2  -1    9.89    1.99
 -12   2   1    9.48    1.49
  10  -2  -1    1.05    0.81
 -10  -2   1    0.72    0.64
 -10   2   1    1.74    0.73
  10   2  -1    1.04    0.96
   8  -2  -1   78.49    3.91
  -8  -2   1   78.80    2.88
   8   2  -1   76.46    3.29
  -8   2   1   80.00    2.79
   6  -2  -1   23.44    1.27
   6  -2  -1   27.08    1.55
  -6  -2   1   23.05    1.38
  -6   2   1   24.48    1.28
   6   2  -1   26.46    1.60
  -4  -2   1   86.55    2.56
  -4  -2   1   89.21    2.33
   4  -2  -1   93.57    2.50
  -4  -2   1   91.24    2.50
  -4  -2   1   91.65    3.11
   4  -2  -1   94.34    2.38
   4  -2  -1   93.02    2.89
  -4   2   1   91.70    2.49
   4   2  -1   90.57    2.34
  -4   2   1   88.22    2.80
   4   2  -1   94.20    2.92
   2  -2  -1   18.11    0.81
  -2  -2   1   17.62    0.79
  -2  -2   1   19.08    0.94
   2  -2  -1   18.61    1.02
  -2  -2   1   16.53    0.73
   2   2  -1   17.43    0.76
   2   2  -1   17.36    0.79
  -2   2   1   17.29    0.95
  -2   2   1   17.77    0.81
   0  -2  -1  222.92    5.20
   0  -2   1  209.38    4.74
   0  -2  -1  214.05    4.89
   0  -2   1  218.46    4.89
   0  -2   1  215.85    5.02
   0   2  -1  220.92    5.03
   0   2   1  221.19    5.18
   0   2   1  216.09    4.88
   0   2  -1  207.10    4.72
   0   2  -1  219.21    4.91
  -2  -2  -1   78.41    2.04
  -2  -2  -1   75.89    2.06
   2  -2   1   78.46    2.06
  -2  -2  -1   76.07    2.43
   2  -2   1   77.86    2.11
  -2   2  -1   79.09    2.08
   2   2   1   78.77    2.49
  -2   2  -1   78.46    2.31
  -2   2  -1   77.37    2.10
   2   2   1   77.51    2.06
   4  -2   1  173.63    4.30
  -4  -2  -1  158.81    4.64
  -4  -2  -1  161.37    3.94
   4  -2   1  175.31    4.63
   4  -2   1  180.56    4.00
  -4  -2  -1  172.61    4.30
   4   2   1  172.44    4.80
  -4   2  -1  172.41    4.32
  -4   2  -1  168.31    4.51
   4   2   1  167.54    3.93
  -4   2  -1  169.31    4.14
  -6  -2  -1    6.91    0.86
   6  -2   1    6.09    1.03
  -6   2  -1    6.54    0.75
   6   2   1    6.46    1.08
  -8  -2  -1   70.60    2.77
   8  -2   1   70.97    3.11
   8   2   1   70.04    3.20
  -8   2  -1   71.14    2.75
 -10  -2  -1    2.11    1.00
  10  -2   1    3.22    1.08
  10   2   1    0.70    0.84
 -10   2  -1    3.55    1.01
  12  -2   1   21.34    2.22
 -12  -2  -1   24.14    2.15
 -12   2  -1   21.34    2.17
  12   2   1   24.72    2.54
 -13  -3   1    4.31    1.64
  13  -3  -1    6.27    1.71
 -13   3   1    5.48    1.38
  13   3  -1    9.05    1.99
  11  -3  -1    3.01    1.18
 -11  -3   1   -0.97    0.92
 -11   3   1    0.87    0.87
  11   3  -1    1.39    1.15
  -9  -3   1   11.09    1.28
   9  -3  -1   12.14    1.50
  -9   3   1   13.27    1.26
   9   3  -1   12.98    1.65
  -7  -3   1   28.86    1.21
  -7  -3   1   32.03    1.69
   7  -3  -1   32.14    1.28
   7   3  -1   32.13    1.98
   7   3  -1   33.14    1.26
  -7   3   1   31.42    1.56
  -7   3   1   31.38    1.27
   5  -3  -1   38.76    1.96
  -5  -3   1   33.81    1.39
   5  -3  -1   37.31    1.41
   5  -3  -1   40.94    1.52
  -5  -3   1   37.41    1.48
  -5  -3   1   36.95    1.59
  -5   3   1   38.15    1.48
  -5   3   1   37.89    1.43
   5   3  -1   39.75    1.98
   5   3  -1   36.64    1.40
  -3  -3   1   70.70    2.12
  -3  -3   1   74.55    2.55
  -3  -3   1   69.64    2.44
  -3  -3   1   70.75    2.03
   3  -3  -1   72.61    2.16
   3  -3  -1   74.65    2.61
  -3   3   1   68.34    2.47
   3   3  -1   69.30    2.03
   3   3  -1   70.56    2.14
  -3   3   1   72.60    2.16
  -1  -3   1   84.34    2.43
   1  -3  -1   84.62    2.46
  -1  -3   1   89.11    2.70
   1  -3  -1   88.63    2.80
  -1   3   1   86.88    2.75
   1   3  -1   84.43    2.46
  -1   3   1   85.47    2.46
   1   3  -1   87.70    2.66
   1  -3   1   32.95    1.54
   1  -3   1   33.04    1.32
  -1  -3  -1   33.11    1.32
  -1  -3  -1   36.86    1.68
   1  -3   1   32.29    1.14
   1   3   1   33.69    1.34
  -1   3  -1   34.27    1.35
  -3  -3  -1   56.16    1.67
   3  -3   1   57.15    2.18
  -3  -3  -1   53.15    1.80
   3  -3   1   58.64    1.83
   3  -3   1   54.00    1.82
  -3  -3  -1   52.55    1.93
   3   3   1   55.82    1.79
  -3   3  -1   55.49    2.10
  -3   3  -1   58.11    1.85
  -3   3  -1   56.11    1.83
   5  -3   1    5.16    0.57
  -5  -3  -1    5.46    0.54
   5  -3   1    6.20    0.85
  -5  -3  -1    4.80    0.73
  -5  -3  -1    5.99    0.85
   5   3   1    4.71    0.58
  -5   3  -1    4.87    0.62
  -5   3  -1    5.35    0.76
   5   3   1    5.82    0.94
   7  -3   1    0.71    0.41
   7  -3   1    0.20    0.54
  -7  -3  -1    1.44    0.64
  -7   3  -1    0.77    0.56
  -7   3  -1    0.49    0.34
   7   3   1    0.57    0.64
   9  -3   1    7.33    1.34
  -9  -3  -1    6.23    1.19
   9   3   1    6.78    1.46
  -9   3  -1    4.97    0.99
 -11  -3  -1   17.88    1.87
  11  -3   1   15.20    1.89
 -11   3  -1   15.67    1.69
  13  -3   1    7.45    1.71
 -13  -3  -1    5.99    1.58
 -13   3  -1    7.43    1.62
  13   3   1    5.49    1.73
  12  -4  -1    0.11    1.06
 -12  -4   1    1.41    1.06
 -12   4   1    0.72    1.03
  12   4  -1    0.78    1.24
 -10  -4   1   33.91    2.25
  10  -4  -1   30.01    2.33
 -10   4   1   30.52    1.80
  10   4  -1   23.87    2.25
   8  -4  -1    3.35    1.06
  -8  -4   1    3.39    1.02
   8   4  -1    3.03    0.58
   8   4  -1    1.80    0.92
  -8   4   1    2.39    0.69
  -8   4   1    3.29    0.67
  -6  -4   1  144.59    4.15
   6  -4  -1  147.97    4.80
  -6   4   1  146.98    3.94
   6   4  -1  143.14    4.79
  -6   4   1  146.87    3.91
   6   4  -1  143.05    3.89
  -4  -4   1   50.86    1.87
  -4  -4   1   53.48    2.36
  -4  -4   1   50.84    1.73
   4  -4  -1   52.68    2.37
   4   4  -1   51.31    1.90
  -4   4   1   53.23    1.91
   2  -4  -1   50.07    2.19
  -2  -4   1   49.29    2.14
   2   4  -1   47.36    1.81
  -2   4   1   47.80    1.80
   0  -4  -1   10.00    1.00
   0  -4   1    9.18    0.97
   0   4   1    9.17    0.84
   0   4  -1    9.31    0.86
  -2  -4  -1  348.77    8.76
   2  -4   1  360.25    8.62
   2   4   1  343.96    8.08
  -2   4  -1  350.65    8.14
   4  -4   1    9.62    1.06
   4  -4   1    6.75    0.73
  -4  -4  -1    8.61    1.14
  -4  -4  -1    6.47    0.79
  -4  -4  -1    7.11    0.65
  -4   4  -1    7.93    0.75
  -4   4  -1    7.37    0.71
   4   4   1    8.05    0.80
   6  -4   1  167.91    5.25
  -6  -4  -1  169.39    4.63
   6   4   1  161.47    5.42
  -6   4  -1  165.88    4.36
  -6   4  -1  164.37    4.55
   6   4   1  164.84    4.29
   8  -4   1    9.30    1.57
  -8  -4  -1    9.64    1.33
  -8   4  -1    9.12    0.89
  -8   4  -1    7.91    1.12
   8   4   1    8.09    1.53
   8   4   1    8.01    0.81
  10  -4   1   15.29    1.95
 -10  -4  -1   16.89    1.73
  10   4   1   14.43    1.91
 -10   4  -1   16.67    1.59
 -12  -4  -1    3.48    1.22
  12  -4   1    5.38    1.60
  12   4   1    2.41    1.53
 -12   4  -1    2.70    1.07
  11  -5  -1   17.10    2.10
 -11  -5   1   17.58    2.03
 -11   5   1   15.85    1.58
 -11   5   1   16.38    1.30
  11   5  -1   19.12    2.34
  -9  -5   1   12.09    1.44
   9  -5  -1    8.57    1.76
   9   5  -1   11.66    1.89
  -9   5   1   10.62    1.03
  -9   5   1   10.59    1.32
  -7  -5   1   17.13    1.69
   7  -5  -1   15.90    1.69
  -7   5   1   17.19    1.20
  -7   5   1   19.37    1.30
  -5  -5   1   30.28    2.05
  -5  -5   1   26.00    1.47
   5  -5  -1   26.95    1.94
  -5   5   1   27.93    1.49
  -3  -5   1   42.14    2.20
   3  -5  -1   38.42    2.61
  -3   5   1   42.64    2.27
   3   5  -1   36.72    2.58
   1  -5  -1   35.42    1.95
  -1  -5   1   32.80    1.80
   1  -5   1   26.01    1.62
  -1  -5  -1   26.18    1.72
   1   5   1   22.17    1.96
   3  -5   1    0.09    0.58
  -3  -5  -1    1.41    0.70
  -3   5  -1    1.44    0.68
   5  -5   1    9.16    1.31
  -5  -5  -1    8.07    1.38
  -5   5  -1    7.55    0.96
  -5   5  -1    8.19    0.87
   7  -5   1    3.74    1.08
  -7   5  -1    3.65    0.83
  -7   5  -1    3.80    0.77
  -9  -5  -1   11.00    1.49
   9  -5   1   10.62    2.08
   9   5   1    8.38    2.06
   9   5   1   10.43    1.34
  -9   5  -1   11.32    1.51
  11  -5   1   15.62    2.43
  11   5   1   16.45    2.64
 -10  -6   1    2.17    1.44
  10  -6  -1    2.69    1.39
 -10  -6   1    0.51    1.17
 -10   6   1    2.64    0.93
 -10   6   1    3.75    1.04
   8  -6  -1   56.53    3.25
  -8  -6   1   58.91    2.66
  -8  -6   1   58.26    3.37
   8   6  -1   57.09    2.43
  -8   6   1   58.54    2.43
   6  -6  -1    2.03    1.01
  -6  -6   1    1.54    1.10
  -6  -6   1    0.80    0.89
   6   6  -1    1.24    0.69
  -6   6   1   -0.08    0.62
  -4  -6   1  155.99    5.39
   4  -6  -1  159.67    5.47
  -4   6   1  167.26    4.74
   4   6  -1  160.69    4.70
   2  -6  -1    9.87    1.58
  -2  -6   1   10.68    1.43
   2   6  -1    9.36    1.08
  -2   6   1    9.01    1.10
   0  -6  -1  131.29    4.66
   0  -6   1  134.32    4.56
   0   6   1  130.14    4.05
   0   6  -1  136.43    4.14
   2  -6   1   11.36    1.46
  -2  -6  -1   10.90    1.67
  -2   6  -1   11.12    1.16
   2   6   1   12.88    1.27
  -4  -6  -1   53.81    2.97
   4  -6   1   57.83    2.87
  -4   6  -1   53.08    2.31
   4   6   1   53.63    2.33
  -6  -6  -1    9.49    1.67
   6  -6   1   12.25    1.75
   6   6   1   12.10    1.18
  -6   6  -1   10.07    1.18
  -6   6  -1   10.52    1.11
  -8  -6  -1   43.57    2.32
  -8  -6  -1   50.11    3.27
   8  -6   1   47.65    4.41
  -8   6  -1   47.62    2.21
   8   6   1   46.54    2.11
  -8   6  -1   50.28    2.28
   7  -7  -1   30.55    2.69
  -7  -7   1   27.93    2.84
   7   7  -1   29.60    1.95
  -7   7   1   32.95    1.91
   5  -7  -1    4.46    1.41
  -5  -7   1    5.41    1.49
   5   7  -1    3.31    1.04
  -5   7   1    3.56    1.12
   3  -7  -1    8.32    1.53
  -3  -7   1    9.43    1.66
  -3   7   1    8.53    1.40
   3   7  -1    7.97    1.26
  -1  -7   1    8.06    1.44
   1  -7  -1    8.70    1.50
   1   7  -1   10.93    1.41
  -1   7   1    9.76    1.40
   1  -7   1   29.78    2.20
  -1  -7  -1   24.52    2.07
  -1   7  -1   26.64    1.77
   1   7   1   27.17    1.77
  -3  -7  -1    7.04    1.57
   3  -7   1    6.78    1.23
  -3   7  -1    5.27    1.10
   3   7   1    7.10    1.28
  -5  -7  -1   30.82    3.52
   5  -7   1   29.66    2.31
   5   7   1   28.89    1.86
  -5   7  -1   25.63    1.79
   7  -7   1    3.16    1.28
  -7  -7  -1    1.25    1.41
  -7   7  -1   -0.49    0.96
   7   7   1    1.55    1.02
  -4  -8   1   71.13    3.81
   4  -8  -1   78.19    3.97
  -4   8   1   76.34    3.25
   4   8  -1   75.17    3.22
   2  -8  -1   18.41    2.21
  -2  -8   1   18.27    2.28
  -2   8   1   16.29    1.81
   2   8  -1   16.17    1.73
   0  -8  -1   31.62    2.59
   0  -8   1   31.03    2.54
   0   8   1   30.24    2.22
   0   8  -1   35.15    2.16
  -2  -8  -1   37.30    2.82
  -2   8  -1   43.18    2.42
   2   8   1   42.06    2.47
   4  -8   1   43.66    2.96
  -4  -8  -1   48.61    3.27
  -4   8  -1   44.15    2.50
   4   8   1   42.96    2.46
  14   0  -2   22.51    2.39
 -14   0   2   29.78    2.34
  12   0  -2   56.28    3.13
 -12   0   2   61.47    2.96
  10   0  -2  110.09    4.14
 -10   0   2  106.60    3.77
   8   0  -2  155.19    4.76
  -8   0   2  148.97    4.35
  -6   0   2  237.25    6.10
  -6   0   2  246.35    5.95
   6   0  -2  241.33    6.20
   4   0  -2  991.01   20.99
  -4   0   2 1000.00   20.73
  -4   0   2  989.87   20.95
   2   0  -2  754.56   15.46
  -2   0   2  736.58   15.52
   2   0  -2  761.17   15.52
   2   0  -2  747.17   15.54
  -2   0   2  743.59   15.51
  -2   0   2  753.14   15.46
   0   0  -2  254.82    5.34
   0   0   2  229.88    5.36
   0   0  -2  253.15    5.39
   0   0   2  247.38    5.35
   0   0  -2  265.85    5.35
   0   0   2  250.94    5.33
  -2   0  -2   84.16    2.28
  -2   0  -2   78.84    1.88
   2   0   2   75.85    2.13
   2   0   2   79.84    1.89
   2   0   2   82.82    2.29
  -2   0  -2   79.80    2.17
  -4   0  -2  466.78   10.80
  -4   0  -2  480.78   10.64
   4   0   2  489.13   10.91
   4   0   2  471.84   10.58
   6   0   2    6.57    1.12
  -6   0  -2    4.52    0.80
   8   0   2  325.05    8.85
  -8   0  -2  334.13    8.41
 -10   0  -2   35.04    2.18
  10   0   2   29.81    2.34
  12   0   2   69.41    3.86
 -12   0  -2   71.46    3.35
 -13  -1   2   15.45    2.40
  13  -1  -2   14.38    3.19
 -13   1   2   13.12    2.28
 -11  -1   2   70.50    3.15
  11  -1  -2   74.67    3.53
 -11   1   2   74.80    3.12
  11   1  -2   68.50    3.45
   9  -1  -2   27.06    1.83
   9   1  -2   25.31    2.32
   7  -1  -2   70.12    2.76
  -7  -1   2   73.81    2.61
   7   1  -2   73.67    2.79
  -7   1   2   74.05    2.52
  -5  -1   2  109.37    3.08
  -5  -1   2  109.29    2.99
   5  -1  -2  112.91    3.32
  -5  -1   2  110.26    3.54
   5  -1  -2  113.21    3.18
  -5   1   2  113.84    3.06
   5   1  -2  113.46    3.30
  -5   1   2  110.32    3.24
   3  -1  -2  257.75    5.59
  -3  -1   2  251.19    5.56
  -3  -1   2  251.50    5.55
   3  -1  -2  256.56    5.93
  -3  -1   2  251.37    5.72
  -3  -1   2  261.18    5.83
  -3   1   2  266.46    5.62
  -3   1   2  255.82    5.92
  -3   1   2  260.00    5.59
  -3   1   2  257.21    5.64
   3   1  -2  265.23    5.87
   3   1  -2  254.88    5.73
   1  -1  -2   25.78    0.89
  -1  -1   2   28.21    0.91
   1  -1  -2   30.35    1.06
  -1  -1   2   26.72    0.89
  -1   1   2   24.62    0.88
   1   1  -2   31.61    0.93
  -1   1   2   27.94    1.04
   1  -1   2  372.55    7.69
   1  -1   2  370.00    7.71
   1  -1   2  374.38    7.81
  -1  -1  -2  342.94    7.67
  -1  -1  -2  356.92    8.01
  -1  -1  -2  362.77    7.71
   1  -1   2  357.85    7.83
  -1   1  -2  362.80    7.85
   1   1   2  353.60    7.68
   1   1   2  352.83    7.69
  -1   1  -2  364.10    7.78
   1   1   2  369.89    8.06
  -3  -1  -2   35.51    1.08
   3  -1   2   38.82    1.11
   3  -1   2   41.19    1.56
  -3  -1  -2   36.07    1.55
   3  -1   2   39.73    1.43
   3  -1   2   38.22    1.10
  -3  -1  -2   36.69    1.38
  -3   1  -2   38.60    1.43
   3   1   2   38.33    1.64
   3   1   2   36.13    1.09
  -3   1  -2   38.00    1.48
   3   1   2   37.82    1.35
  -5  -1  -2   90.66    2.85
   5  -1   2   88.88    3.06
  -5   1  -2   89.71    2.83
   5   1   2   93.12    3.18
   7  -1   2   88.54    3.38
  -7  -1  -2   89.19    3.09
   7   1   2   88.20    3.45
  -7   1  -2   89.58    3.09
  -9  -1  -2   23.33    1.70
   9  -1   2   21.98    1.76
   9   1   2   21.82    1.90
  -9   1  -2   20.82    1.59
 -11  -1  -2   23.66    1.95
  11  -1   2   17.05    1.95
 -11   1  -2   21.18    1.81
  11   1   2   22.27    2.12
 -13  -1  -2    7.30    1.59
  13  -1   2    8.69    1.86
  13   1   2    5.76    1.61
 -13   1  -2    7.95    1.73
  14  -2  -2   24.32    2.48
 -14  -2   2   27.27    2.39
 -14   2   2   26.44    2.25
  14   2  -2   24.92    2.63
  12  -2  -2   16.10    1.88
 -12  -2   2   15.96    1.74
 -12   2   2   13.30    1.59
  12   2  -2   12.02    1.95
  10  -2  -2  100.16    4.14
 -10  -2   2  116.52    3.93
  10   2  -2  103.34    4.23
 -10   2   2  113.59    3.81
  -8  -2   2   56.22    2.40
   8  -2  -2   60.92    2.92
   8   2  -2   59.13    2.68
  -8   2   2   58.56    2.29
   6  -2  -2  192.93    4.48
   6  -2  -2  192.16    5.34
  -6  -2   2  194.46    4.99
   6  -2  -2  193.27    4.82
  -6  -2   2  187.68    4.42
   6   2  -2  191.47    5.32
  -6   2   2  193.79    4.48
  -6   2   2  201.04    4.91
  -4  -2   2   41.83    1.35
   4  -2  -2   42.99    1.41
   4  -2  -2   44.24    1.41
  -4  -2   2   42.47    1.66
   4  -2  -2   42.28    1.78
  -4   2   2   42.99    1.41
   4   2  -2   44.11    1.51
  -4   2   2   43.88    1.44
   4   2  -2   45.40    1.75
  -4   2   2   40.98    1.72
  -2  -2   2  606.40   13.25
   2  -2  -2  641.33   13.35
  -2  -2   2  626.80   13.31
   2  -2  -2  644.18   13.72
  -2  -2   2  637.79   13.45
   2   2  -2  613.78   13.27
  -2   2   2  641.67   13.49
  -2   2   2  621.67   13.63
   0  -2  -2   61.18    2.04
   0  -2   2   58.26    1.70
   0  -2   2   63.14    1.77
   0  -2   2   62.84    1.81
   0  -2  -2   60.31    1.76
   0   2   2   61.17    1.99
   0   2   2   66.52    2.38
   0   2  -2   60.28    1.77
   0   2  -2   58.92    1.70
   0   2  -2   64.76    1.93
   2  -2   2  705.72   14.90
   2  -2   2  728.16   14.76
  -2  -2  -2  669.23   14.71
  -2  -2  -2  695.77   15.42
  -2  -2  -2  696.55   14.71
  -2   2  -2  715.22   14.77
   2   2   2  709.93   15.39
  -2   2  -2  696.82   14.90
  -2   2  -2  696.59   15.00
   2   2   2  676.13   14.66
   4  -2   2   18.25    1.24
  -4  -2  -2   19.96    1.10
   4  -2   2   21.03    0.87
   4  -2   2   18.31    1.08
  -4  -2  -2   19.00    0.83
  -4   2  -2   20.22    1.20
   4   2   2   18.28    1.02
  -4   2  -2   21.57    1.14
   4   2   2   18.83    1.36
  -6  -2  -2  224.94    5.86
   6  -2   2  225.96    6.26
   6   2   2  228.15    6.52
  -6   2  -2  229.32    5.94
   8  -2   2   34.23    2.10
  -8  -2  -2   31.22    1.86
   8   2   2   33.23    2.24
  -8   2  -2   30.59    1.84
  10  -2   2   74.50    3.58
 -10  -2  -2   79.23    3.30
 -10   2  -2   76.05    3.23
  10   2   2   72.77    3.80
  12  -2   2   20.04    2.25
 -12  -2  -2   25.15    2.14
 -12   2  -2   23.39    2.18
  12   2   2   22.83    2.39
  13  -3  -2   34.20    2.70
 -13  -3   2   38.54    2.68
  13   3  -2   35.39    2.94
  11  -3  -2    1.32    0.97
 -11  -3   2    2.87    1.13
 -11   3   2    1.72    0.89
  11   3  -2    0.67    1.01
  -9  -3   2   49.88    2.44
   9  -3  -2   48.83    2.68
   9   3  -2   51.19    2.76
   7  -3  -2   42.44    2.38
  -7  -3   2   37.79    1.85
   7  -3  -2   38.83    1.46
  -7  -3   2   38.70    1.45
   7   3  -2   41.68    2.17
  -7   3   2   41.13    1.72
  -7   3   2   42.64    1.51
   5  -3  -2  210.12    5.71
  -5  -3   2  197.61    4.92
  -5  -3   2  211.05    5.27
   5  -3  -2  212.57    5.02
   5  -3  -2  210.41    4.93
   5   3  -2  205.00    4.98
  -5   3   2  198.54    4.92
   5   3  -2  209.11    5.67
  -5   3   2  211.26    5.00
   3  -3  -2   39.25    1.48
  -3  -3   2   38.62    1.42
   3  -3  -2   40.30    1.86
  -3  -3   2   39.21    1.69
  -3  -3   2   38.30    1.39
  -3  -3   2   38.58    1.81
   3   3  -2   39.64    1.48
  -3   3   2   39.59    1.89
   3   3  -2   38.07    1.39
  -3   3   2   37.49    1.46
  -1  -3   2  173.96    4.22
   1  -3  -2  186.36    4.84
   1  -3  -2  183.18    4.45
  -1  -3   2  179.79    4.40
  -1  -3   2  183.18    4.57
  -1   3   2  177.14    4.75
   1   3  -2  179.64    4.43
  -1   3   2  183.08    4.44
   1   3  -2  171.64    4.34
   1   3  -2  184.01    4.56
   1  -3   2    7.84    0.85
  -1  -3  -2    7.95    0.74
   1  -3   2    9.80    0.71
  -1  -3  -2    7.25    0.92
  -1  -3  -2    8.89    0.88
   1  -3   2    9.71    0.66
  -1   3  -2    8.32    0.73
  -1   3  -2    9.23    0.67
   1   3   2    8.32    0.73
  -1   3  -2    7.92    0.72
  -3  -3  -2  120.84    3.32
   3  -3   2  134.24    3.80
   3  -3   2  125.50    3.32
  -3  -3  -2  129.02    3.31
   3  -3   2  127.98    3.48
   3   3   2  121.83    3.32
  -3   3  -2  125.43    3.68
  -3   3  -2  132.00    3.49
  -3   3  -2  134.77    3.39
  -5  -3  -2   11.22    0.73
  -5  -3  -2   13.80    1.08
   5  -3   2   14.76    0.87
   5  -3   2   14.49    1.23
  -5   3  -2   14.66    1.02
   5   3   2   14.26    1.37
  -5   3  -2   13.34    0.86
   5   3   2   13.16    0.81
   7  -3   2   58.01    1.90
   7  -3   2   57.28    1.89
  -7  -3  -2   61.86    2.50
   7  -3   2   63.60    2.85
  -7   3  -2   63.55    2.53
   7   3   2   57.86    2.90
   9  -3   2   14.08    1.73
  -9  -3  -2   19.94    1.63
  -9   3  -2   15.93    1.47
   9   3   2   12.74    1.65
  11  -3   2   14.39    2.74
 -11  -3  -2   18.09    1.88
 -11   3  -2   18.11    2.13
  11   3   2   20.15    2.32
  12  -4  -2   41.32    3.05
  12   4  -2   40.84    3.08
 -12   4   2   39.90    2.37
  10  -4  -2   16.10    1.81
 -10  -4   2   17.65    1.80
 -10   4   2   16.23    1.10
 -10   4   2   17.99    1.42
  10   4  -2   15.80    1.98
   8  -4  -2   24.85    1.97
  -8  -4   2   25.30    1.77
  -8   4   2   23.91    1.38
   8   4  -2   20.84    1.91
  -8   4   2   23.75    1.23
  -6  -4   2   89.93    3.00
   6  -4  -2   91.91    3.52
   6   4  -2   88.48    3.44
   6   4  -2   89.98    2.79
  -6   4   2   91.37    2.76
  -4  -4   2   72.24    2.71
  -4  -4   2   65.03    2.10
   4  -4  -2   70.71    2.82
   4   4  -2   66.81    2.26
   4   4  -2   66.70    2.15
  -4   4   2   66.09    2.24
   2  -4  -2  107.23    3.57
  -2  -4   2  103.84    3.34
  -2  -4   2  107.52    3.35
   2   4  -2  104.84    3.08
  -2   4   2  107.41    3.10
   2   4  -2  105.22    2.82
   0  -4  -2  160.83    4.64
   0  -4   2  160.09    4.39
   0  -4   2  150.42    3.81
   0   4  -2  152.46    4.30
   0   4  -2  161.20    4.17
   0   4  -2  148.72    3.78
   0   4   2  153.91    4.11
  -2  -4  -2   86.98    3.20
   2  -4   2   84.68    2.49
   2  -4   2   81.45    2.90
  -2   4  -2   85.93    2.64
   2   4   2   83.00    2.60
  -2   4  -2   85.25    2.49
   4  -4   2  108.12    3.58
  -4  -4  -2  106.98    4.82
  -4  -4  -2   99.80    2.97
  -4  -4  -2  101.68    2.83
  -4   4  -2  104.71    3.08
  -4   4  -2  109.19    3.15
   4   4   2   97.48    2.98
   6  -4   2   33.19    2.06
  -6  -4  -2   35.84    1.76
  -6   4  -2   33.59    1.53
   6   4   2   33.16    1.46
  -6   4  -2   33.05    1.70
   6   4   2   32.88    2.25
   8  -4   2   76.76    2.46
  -8  -4  -2   79.27    3.03
   8  -4   2   78.94    3.51
   8   4   2   75.85    3.74
   8   4   2   75.87    2.42
  -8   4  -2   79.01    3.00
 -10  -4  -2   16.10    1.58
  10  -4   2   14.22    1.86
 -10   4  -2   15.06    1.50
  10   4   2    9.47    1.70
  11  -5  -2   31.38    2.66
 -11  -5   2   31.42    2.33
 -11   5   2   29.60    1.91
 -11   5   2   31.69    1.64
  11   5  -2   27.89    2.56
   9  -5  -2    0.65    0.96
  -9  -5   2    1.81    1.06
   9   5  -2    0.21    0.96
  -9   5   2    0.79    0.68
  -9   5   2    1.07    0.63
   7  -5  -2  102.96    4.11
  -7  -5   2   97.57    3.99
   7   5  -2   97.03    3.26
  -7   5   2  102.91    3.20
   5  -5  -2   43.17    2.38
  -5   5   2   40.35    1.83
   5   5  -2   42.32    2.12
   3  -5  -2  179.53    5.55
  -3  -5   2  181.96    5.31
   3   5  -2  175.96    6.22
  -3   5   2  180.88    4.89
  -1  -5   2   29.71    1.72
  -1   5   2   29.50    1.74
   1   5  -2   29.26    1.86
  -1  -5  -2  159.20    5.21
   1  -5   2  155.79    4.79
  -1   5  -2  161.94    4.51
   1   5   2  161.81    5.65
   3  -5   2   23.26    1.69
  -3  -5  -2   23.18    1.82
  -3   5  -2   22.81    1.21
   3   5   2   25.04    1.81
  -3   5  -2   25.16    1.42
  -5  -5  -2   43.59    2.63
   5  -5   2   46.25    2.46
  -5   5  -2   49.22    1.99
  -5   5  -2   45.52    1.99
   5   5   2   46.37    2.19
  -7  -5  -2   15.98    1.64
   7  -5   2   15.36    1.79
   7   5   2   12.35    1.39
  -7   5  -2   16.32    1.40
  -7   5  -2   13.92    1.19
  -9  -5  -2   11.36    1.61
   9  -5   2   11.29    1.81
   9  -5   2    9.49    1.17
   9   5   2    6.67    1.64
  -9   5  -2    9.60    1.39
 -10  -6   2    6.08    1.43
  10  -6  -2    6.73    1.61
 -10  -6   2    6.65    1.14
 -10  -6   2    4.78    1.54
 -10   6   2    7.96    1.16
 -10   6   2    3.25    0.93
  -8  -6   2   34.90    2.14
  -8  -6   2   35.01    2.68
   8  -6  -2   34.72    2.61
   8   6  -2   32.34    1.80
  -8   6   2   34.01    1.87
   6  -6  -2   13.53    1.74
  -6  -6   2   17.82    1.74
  -6  -6   2   19.21    1.50
   6   6  -2   19.83    1.40
  -6   6   2   16.56    1.39
  -4  -6   2   50.02    2.61
   4  -6  -2   46.14    2.68
   4   6  -2   46.65    2.22
  -4   6   2   47.20    2.20
   2  -6  -2   30.16    2.06
  -2  -6   2   30.75    2.01
  -2   6   2   30.59    1.76
   2   6  -2   31.76    1.71
   0  -6   2   66.80    2.96
   0  -6  -2   64.63    3.04
   0   6  -2   65.46    2.61
   0   6   2   62.36    2.55
  -2  -6  -2   26.39    2.05
   2  -6   2   26.08    1.89
  -2   6  -2   27.44    1.65
   2   6   2   25.02    1.63
  -4  -6  -2   41.46    2.74
   4  -6   2   51.03    2.69
  -4   6  -2   49.88    1.98
  -4   6  -2   49.92    2.20
   4   6   2   48.81    2.18
  -6  -6  -2    9.06    1.78
   6  -6   2    9.18    1.64
   6   6   2    9.28    1.19
  -6   6  -2   10.13    1.22
  -6   6  -2    8.43    1.11
  -8  -6  -2   27.00    1.92
  -8  -6  -2   29.07    2.69
   8   6   2   28.69    1.76
  -8   6  -2   28.32    1.88
  -9  -7   2   15.83    2.04
   9  -7  -2   21.13    2.37
  -9  -7   2   19.39    2.38
  -9   7   2   14.23    2.05
   7  -7  -2    9.57    1.90
  -7  -7   2   10.95    1.86
  -7  -7   2   12.29    1.64
   7   7  -2   13.36    1.52
  -7   7   2   16.74    1.66
  -5  -7   2   45.94    2.82
   5  -7  -2   40.52    2.79
   5   7  -2   41.09    2.24
  -5   7   2   45.77    2.32
   3  -7  -2   10.34    1.77
  -3  -7   2   12.48    1.62
   3   7  -2    9.61    1.42
  -3   7   2   11.10    1.35
  -1  -7   2   33.71    2.22
   1  -7  -2   31.05    2.34
  -1   7   2   32.50    1.96
   1   7  -2   30.98    1.98
   1  -7   2   11.30    1.60
  -1  -7  -2    8.87    1.65
  -1   7  -2   11.31    1.43
   1   7   2    9.37    1.38
  -3  -7  -2   25.65    2.23
   3  -7   2   24.55    2.19
  -3   7  -2   27.01    1.81
   3   7   2   25.16    1.80
   5  -7   2   14.46    1.95
  -5  -7  -2   15.64    2.06
  -5   7  -2   13.49    1.69
   5   7   2   14.01    1.55
  -7  -7  -2   10.90    2.15
   7  -7   2   16.62    2.04
  -7   7  -2   13.31    1.56
   7   7   2   13.93    1.61
   6  -8  -2   53.98    3.55
  -6  -8   2   57.98    3.47
  -6   8   2   57.58    2.88
   6   8  -2   53.47    2.73
   4  -8  -2    4.66    1.66
  -4   8   2    4.93    1.29
   4   8  -2    5.64    1.28
   2  -8  -2   28.39    2.52
  -2  -8   2   29.42    2.34
  -2   8   2   27.58    2.02
   0  -8  -2    1.98    1.25
   0  -8   2   -1.22    1.03
   0   8   2    0.46    0.89
   0   8  -2    2.44    1.01
   2  -8   2   42.98    2.92
  -2  -8  -2   32.81    2.79
   2   8   2   40.14    2.37
  -2   8  -2   35.60    2.19
   4  -8   2    1.13    1.15
  -4  -8  -2    1.28    1.28
  -4   8  -2   -0.03    0.94
   4   8   2   -0.57    1.06
 -14   0   3   -0.20    1.04
  14   0  -3    0.96    1.25
  12   0  -3    0.85    0.84
 -12   0   3    0.13    0.95
 -10   0   3    0.35    0.65
  10   0  -3    0.72    0.70
   8   0  -3    5.19    0.99
  -8   0   3    3.82    0.72
  -6   0   3    1.26    0.62
  -6   0   3    0.46    0.45
  -4   0   3    0.05    0.23
   4   0  -3    0.24    0.19
   4   0  -3    0.37    0.30
  -4   0   3    0.34    0.26
  -4   0   3    0.28    0.20
   4   0  -3    0.23    0.30
  -2   0   3    0.49    0.22
   2   0  -3    0.41    0.26
  -2   0   3    0.63    0.26
   2   0  -3    0.47    0.20
  -2   0   3    0.44    0.22
   2   0  -3    0.65    0.22
   0   0   3   -0.14    0.18
   0   0  -3   -0.06    0.20
   0   0  -3    0.23    0.21
   0   0   3   -0.05    0.18
   0   0   3    0.13    0.18
   0   0  -3   -0.09    0.18
  -2   0  -3    0.69    0.30
   2   0   3    0.36    0.22
  -2   0  -3    0.40    0.20
   2   0   3    0.34    0.25
   2   0   3    0.49    0.33
  -2   0  -3    0.46    0.31
  -4   0  -3   -0.03    0.43
  -4   0  -3    0.63    0.40
   4   0   3    0.14    0.49
   4   0   3    0.30    0.39
  -6   0  -3    1.85    0.58
   8   0   3    3.51    1.05
  -8   0  -3    2.24    0.72
 -10   0  -3    0.21    0.73
  10   0   3    0.59    0.86
 -12   0  -3    0.95    0.97
  12   0   3    2.70    1.38
  15  -1  -3   -0.06    1.24
 -15  -1   3   -0.20    1.33
  15   1  -3    0.85    1.42
 -15   1   3    2.49    1.37
  13  -1  -3    1.26    1.00
 -13  -1   3    0.72    1.22
 -13   1   3    1.38    1.17
  13   1  -3    1.98    1.25
  11  -1  -3   31.02    2.21
 -11  -1   3   33.06    2.14
 -11   1   3   31.53    2.02
  11   1  -3   32.40    2.34
  -9  -1   3   21.23    1.52
   9   1  -3   19.48    1.59
  -9   1   3   19.49    1.42
   7  -1  -3   25.86    1.55
  -7  -1   3   27.02    1.45
  -7   1   3   29.04    1.50
   7   1  -3   28.89    1.64
   5  -1  -3   10.55    0.94
  -5  -1   3    9.58    0.56
   5  -1  -3    9.79    0.57
  -5  -1   3    9.91    0.75
  -5  -1   3   11.69    0.85
   5   1  -3   12.07    0.80
  -5   1   3   10.52    0.86
  -5   1   3   10.12    0.60
  -5   1   3   10.14    0.71
   5   1  -3   12.00    0.92
  -5   1   3   10.78    0.84
   3  -1  -3  136.84    3.46
  -3  -1   3  134.37    3.25
  -3  -1   3  136.82    3.32
  -3  -1   3  134.33    3.21
   3  -1  -3  138.74    3.17
   3  -1  -3  139.02    3.23
   3   1  -3  133.24    3.19
   3   1  -3  130.52    3.63
  -3   1   3  139.31    3.25
   3   1  -3  139.03    3.28
  -3   1   3  134.98    3.45
  -3   1   3  140.52    3.18
   1  -1  -3   92.99    2.34
  -1  -1   3   94.09    2.38
   1  -1  -3   92.10    2.17
   1  -1  -3   95.93    2.47
  -1  -1   3   93.30    2.35
   1   1  -3   93.41    2.38
  -1   1   3   94.83    2.19
  -1   1   3   94.77    2.47
   1   1  -3   90.51    2.31
  -1   1   3   93.35    2.34
   1  -1   3  274.43    5.97
  -1  -1  -3  267.28    6.22
  -1  -1  -3  264.31    5.88
   1  -1   3  264.59    5.87
   1  -1   3  268.02    6.07
  -1  -1  -3  265.76    5.91
  -1   1  -3  260.94    5.84
  -1   1  -3  265.21    5.92
   1   1   3  262.45    5.91
   1   1   3  282.39    6.29
   1   1   3  265.32    5.89
   3  -1   3  166.70    4.19
   3  -1   3  155.85    3.60
  -3  -1  -3  147.57    3.57
   3  -1   3  154.66    4.01
  -3  -1  -3  157.16    3.97
  -3  -1  -3  147.67    4.19
  -3   1  -3  154.02    4.05
  -3   1  -3  155.01    4.02
   3   1   3  161.13    4.36
   3   1   3  148.00    3.57
  -5  -1  -3   36.46    1.68
   5  -1   3   40.35    1.88
  -5   1  -3   37.80    1.74
   5   1   3   40.06    1.99
   7  -1   3   42.68    2.46
  -7   1  -3   43.80    2.10
   7   1   3   42.63    2.37
  -9  -1  -3   52.22    2.57
   9  -1   3   55.07    2.85
  -9   1  -3   51.70    2.59
   9   1   3   52.17    2.94
  11  -1   3   14.01    2.13
 -11  -1  -3   11.22    2.03
  14  -2  -3    4.82    1.48
 -14  -2   3    2.69    1.18
 -14   2   3    6.10    1.37
  14   2  -3    3.65    1.42
  12  -2  -3   16.47    1.83
 -12  -2   3   19.18    1.86
  12   2  -3   15.12    1.92
 -12   2   3   17.27    1.70
  10  -2  -3   13.60    1.47
 -10  -2   3   12.73    1.49
 -10   2   3   11.37    1.36
  10   2  -3   10.77    1.52
   8  -2  -3   13.61    1.30
  -8  -2   3   12.00    1.17
  -8   2   3   13.06    1.08
   8   2  -3   12.26    1.25
  -6  -2   3    6.83    0.82
  -6   2   3    4.96    0.61
  -6   2   3    3.30    0.62
  -4  -2   3  124.07    3.18
  -4  -2   3  127.29    3.31
  -4  -2   3  132.56    3.46
  -4  -2   3  126.69    3.16
   4  -2  -3  127.36    3.65
   4  -2  -3  128.33    3.21
   4   2  -3  125.78    3.32
  -4   2   3  123.88    3.58
  -4   2   3  129.21    3.22
  -4   2   3  128.38    3.06
  -4   2   3  128.20    3.14
   2  -2  -3   51.64    1.85
  -2  -2   3   49.10    1.56
  -2  -2   3   48.52    1.52
  -2  -2   3   48.21    1.48
  -2  -2   3   52.26    1.57
   2  -2  -3   49.61    1.55
  -2   2   3   51.63    1.60
  -2   2   3   49.69    1.77
   2   2  -3   48.04    1.55
   0  -2  -3   60.91    1.78
   0  -2   3   59.61    1.71
   0  -2   3   62.40    1.78
   0  -2   3   57.60    1.77
   0  -2  -3   59.96    2.07
   0  -2   3   59.61    1.78
   0   2  -3   59.08    1.82
   0   2  -3   59.78    1.70
   0   2   3   61.51    1.81
  -2  -2  -3   30.33    1.19
   2  -2   3   35.35    1.40
  -2  -2  -3   32.52    1.55
  -2  -2  -3   33.89    1.24
   2  -2   3   36.07    1.24
   2  -2   3   33.79    1.23
   2  -2   3   35.29    1.61
  -2   2  -3   35.33    1.39
  -2   2  -3   32.86    1.37
   2   2   3   33.46    1.68
   2   2   3   34.38    1.24
   2   2   3   33.68    1.21
  -4  -2  -3   31.16    1.40
   4  -2   3   32.15    1.58
  -4  -2  -3   28.66    1.09
   4  -2   3   30.19    1.13
   4  -2   3   29.74    1.13
  -4   2  -3   30.89    1.45
   4   2   3   29.40    1.70
  -4   2  -3   31.67    1.50
   4   2   3   28.83    1.13
   4   2   3   29.06    1.31
   6  -2   3   42.72    2.13
  -6  -2  -3   40.82    1.88
  -6   2  -3   41.51    1.91
   6   2   3   39.37    2.35
  -8  -2  -3   20.62    1.49
   8  -2   3   24.50    1.86
   8   2   3   19.09    1.92
  -8   2  -3   21.39    1.61
 -10  -2  -3    9.54    1.43
  10  -2   3    8.37    1.60
  10   2   3   11.04    2.03
 -10   2  -3   11.40    1.58
  12  -2   3    1.11    1.19
 -12  -2  -3    1.91    1.17
 -12   2  -3    0.25    1.05
  12   2   3   -0.12    1.25
  13  -3  -3    4.16    1.41
 -13  -3   3    5.88    1.44
  13   3  -3    3.31    1.57
 -13   3   3    3.98    1.22
  11  -3  -3   12.05    1.56
 -11  -3   3   12.18    1.69
 -11   3   3   11.97    1.27
  11   3  -3    8.68    1.74
   9  -3  -3   22.55    1.88
  -9  -3   3   23.49    1.75
   9   3  -3   22.93    1.92
  -9   3   3   22.93    1.48
  -9   3   3   23.64    1.15
  -7  -3   3   26.65    1.54
   7  -3  -3   28.44    1.78
  -7  -3   3   24.55    1.13
  -7  -3   3   24.66    1.18
   7   3  -3   26.85    1.71
  -7   3   3   25.29    1.20
  -7   3   3   28.15    1.35
  -5  -3   3   42.97    1.60
   5  -3  -3   47.47    1.83
   5  -3  -3   46.78    2.11
  -5  -3   3   44.38    1.90
  -5   3   3   45.90    1.66
   5   3  -3   44.87    1.73
   5   3  -3   48.69    2.06
   3  -3  -3    8.94    1.01
  -3  -3   3    7.35    0.68
  -3  -3   3    8.70    0.70
   3  -3  -3    8.95    0.73
  -3  -3   3    9.24    0.77
  -3  -3   3    9.86    0.87
   3   3  -3    9.09    0.75
  -3   3   3    8.73    0.79
   3   3  -3    9.16    0.77
   1  -3  -3   59.85    1.96
   1  -3  -3   61.94    2.32
  -1  -3   3   56.34    1.84
  -1  -3   3   63.43    1.96
   1   3  -3   59.19    1.96
   1   3  -3   60.29    1.95
  -1   3   3   58.34    2.20
   1   3  -3   56.83    1.83
  -1   3   3   59.65    1.97
  -1  -3  -3   18.51    1.30
  -1  -3  -3   14.48    0.90
   1  -3   3   17.04    0.94
   1  -3   3   15.15    0.91
  -1   3  -3   16.10    0.98
   1   3   3   15.82    0.98
  -3  -3  -3   70.75    2.21
   3  -3   3   76.52    2.60
   3  -3   3   76.42    2.46
  -3  -3  -3   77.29    2.25
  -3   3  -3   76.65    2.54
   3   3   3   70.69    2.22
  -3   3  -3   76.83    2.45
   3   3   3   65.98    2.10
   5  -3   3   29.10    1.26
   5  -3   3   29.61    1.69
  -5  -3  -3   26.24    1.17
  -5  -3  -3   29.58    1.48
   5   3   3   29.52    1.26
  -5   3  -3   31.97    1.59
   5   3   3   28.28    2.89
   7  -3   3   53.72    2.62
   7  -3   3   48.81    2.17
  -7  -3  -3   52.02    2.55
   7  -3   3   53.74    1.82
   7   3   3   53.18    2.91
  -7   3  -3   56.60    2.42
  -9  -3  -3   -0.30    0.70
   9  -3   3    1.22    1.02
   9   3   3    0.08    0.98
  -9   3  -3    0.60    0.74
 -11  -3  -3   10.93    1.88
  11  -3   3    8.74    1.87
 -11   3  -3   13.33    1.76
  11   3   3    8.25    1.94
  12  -4  -3   33.60    2.63
  12   4  -3   27.93    2.80
 -12   4   3   37.78    2.30
 -10  -4   3   83.79    3.50
 -10  -4   3   83.17    2.63
  10  -4  -3   80.09    3.85
 -10   4   3   83.33    3.07
 -10   4   3   84.99    2.63
  10   4  -3   79.68    3.77
  -8  -4   3    4.21    1.07
  -8  -4   3    6.57    0.81
   8  -4  -3    4.37    1.11
   8   4  -3    4.84    1.11
  -8   4   3    4.88    0.73
  -8   4   3    4.58    0.86
   6  -4  -3  117.11    4.08
  -6   4   3  111.09    3.28
   4  -4  -3   41.60    2.12
  -4  -4   3   40.45    1.93
  -4   4   3   42.02    1.70
   4   4  -3   38.96    1.69
   4   4  -3   40.88    1.65
  -2  -4   3  208.48    5.46
  -2  -4   3  209.75    5.52
   2  -4  -3  219.78    5.96
  -2  -4   3  204.54    5.09
   2   4  -3  213.24    5.12
   2   4  -3  212.60    5.35
  -2   4   3  213.96    5.33
   0  -4   3    7.64    0.71
   0  -4   3    8.18    0.93
   0  -4  -3    8.72    1.12
   0   4   3    9.32    0.86
   0   4  -3    8.87    0.82
   0   4  -3    7.81    0.81
   0   4  -3    8.20    0.71
  -2  -4  -3  100.41    3.61
   2  -4   3  104.21    3.30
  -2   4  -3   97.37    2.93
   2   4   3   98.35    2.99
  -2   4  -3   99.87    3.01
  -4  -4  -3   89.11    3.62
   4  -4   3   91.25    3.27
  -4  -4  -3   85.96    2.70
  -4   4  -3   88.73    2.79
  -4   4  -3   91.56    2.94
   4   4   3   90.51    2.77
   6  -4   3    2.97    0.93
  -6  -4  -3    3.34    0.74
   6  -4   3    3.17    0.60
   6   4   3    3.16    1.11
  -6   4  -3    3.35    0.72
   6   4   3    4.00    0.66
  -8  -4  -3   14.13    1.43
   8  -4   3   11.44    1.61
   8  -4   3   14.25    1.01
  -8   4  -3   15.05    1.45
   8   4   3   11.22    1.76
   8   4   3   12.26    0.95
  10  -4   3   39.90    4.39
 -10  -4  -3   41.26    2.52
  10   4   3   41.24    3.08
 -10   4  -3   43.71    2.74
 -11  -5   3   33.02    2.44
  11  -5  -3   34.28    2.77
 -11  -5   3   30.32    1.73
 -11   5   3   29.80    1.68
  11   5  -3   29.70    2.52
 -11   5   3   27.21    1.77
   9  -5  -3   26.14    2.17
  -9  -5   3   28.90    1.57
  -9  -5   3   25.38    1.92
  -9   5   3   23.45    1.46
   9   5  -3   23.92    2.14
  -9   5   3   28.36    1.55
   7  -5  -3    5.56    1.30
  -7  -5   3    6.54    1.33
  -7  -5   3    4.79    1.06
  -7   5   3    7.40    1.03
   5  -5  -3   24.54    1.94
  -5  -5   3   27.81    1.80
   5   5  -3   23.65    1.50
  -5   5   3   26.37    1.48
   5   5  -3   24.50    1.38
  -3  -5   3   39.80    1.96
   3  -5  -3   36.00    2.16
  -3   5   3   37.67    1.81
   3   5  -3   38.49    1.57
   3   5  -3   37.99    1.80
   1  -5  -3   50.20    2.46
  -1  -5   3   48.84    2.14
  -1  -5   3   41.84    1.65
  -1   5   3   46.97    1.96
   1   5  -3   47.25    2.00
   1   5  -3   45.54    1.70
   1  -5   3   40.84    2.04
  -1  -5  -3   41.43    2.29
   1   5   3   40.55    1.86
  -1   5  -3   41.43    1.89
  -1   5  -3   40.09    1.61
   3  -5   3   48.28    2.38
  -3  -5  -3   50.03    2.72
  -3   5  -3   52.90    2.02
  -3   5  -3   51.38    2.13
   3   5   3   50.97    2.12
   5  -5   3    1.34    0.71
  -5  -5  -3    0.16    0.86
   5   5   3    2.40    0.67
   7  -5   3   17.43    1.29
   7  -5   3   16.07    1.83
  -7  -5  -3   17.04    1.45
   7   5   3   16.93    1.28
  -7   5  -3   18.88    1.47
   9  -5   3   27.67    1.62
  -9  -5  -3   23.61    1.99
  -9   5  -3   26.11    2.04
   9   5   3   25.97    2.07
 -10  -6   3    6.56    2.04
  10  -6  -3    5.38    1.48
 -10  -6   3    3.58    1.19
 -10  -6   3    3.06    1.40
 -10   6   3    6.80    1.22
  -8  -6   3   53.98    3.12
  -8  -6   3   55.64    2.73
   8  -6  -3   59.67    3.44
  -8   6   3   55.03    2.37
  -6  -6   3    2.19    1.05
  -6  -6   3    1.07    0.85
   6  -6  -3    3.44    1.25
   6   6  -3    0.52    0.70
  -6   6   3    1.73    0.82
   4  -6  -3   63.25    3.20
  -4  -6   3   62.96    2.91
   4   6  -3   59.96    2.54
  -4   6   3   58.85    2.48
   4   6  -3   63.65    2.28
  -2  -6   3    6.25    1.40
   2  -6  -3    6.17    1.24
   2   6  -3    7.68    1.07
   2   6  -3    6.56    0.84
  -2   6   3    8.52    1.24
   0  -6   3   33.38    2.43
   0  -6  -3   34.80    2.24
   0   6   3   35.54    1.81
   0   6  -3   31.64    1.45
   0   6  -3   32.47    1.79
  -2  -6  -3    2.40    1.03
   2  -6   3    4.52    1.16
   2   6   3    2.59    0.83
  -2   6  -3    3.61    0.75
  -2   6  -3    2.03    0.80
   4  -6   3   63.50    3.08
  -4  -6  -3   63.56    3.38
  -4   6  -3   64.63    2.60
  -4   6  -3   61.50    2.51
   4   6   3   61.39    2.54
  -6  -6  -3    4.91    2.19
   6  -6   3    8.76    1.51
  -6   6  -3    6.60    0.99
   6   6   3    4.62    1.04
   8  -6   3   31.22    2.58
   8  -6   3   32.98    1.95
  -8  -6  -3   29.43    1.87
  -8  -6  -3   32.82    2.83
  -8   6  -3   31.49    2.03
   8   6   3   30.41    1.86
  -9  -7   3    2.97    1.47
  -9  -7   3   -1.59    1.16
   9  -7  -3    2.02    1.44
  -9  -7   3    2.52    1.40
  -9   7   3    3.04    1.09
  -7  -7   3   33.55    2.62
  -7  -7   3   34.01    2.24
   7  -7  -3   36.58    2.74
  -7   7   3   36.20    2.49
   5  -7  -3   18.30    2.37
  -5  -7   3   20.09    1.90
   5   7  -3   18.41    1.56
   3  -7  -3   92.89    4.19
  -3  -7   3   97.74    3.87
   3   7  -3   95.84    3.61
  -3   7   3   98.35    3.57
   1  -7  -3    2.70    1.15
  -1  -7   3    1.63    0.90
   1   7  -3    2.06    0.94
  -1   7   3    2.40    0.90
   1  -7   3   96.13    3.81
  -1  -7  -3   85.27    4.01
  -1   7  -3   86.15    3.38
   1   7   3   89.80    3.41
   3  -7   3    1.97    0.97
  -3  -7  -3    5.33    2.09
  -3   7  -3    3.69    1.04
   3   7   3    2.36    0.92
   5  -7   3   48.86    2.93
  -5  -7  -3   53.50    3.31
  -5   7  -3   54.83    2.37
   5   7   3   48.58    2.42
  -5   7  -3   50.41    2.91
  -7  -7  -3    1.86    1.44
   7  -7   3    3.17    1.46
  -7   7  -3    1.85    1.12
   7   7   3    2.00    1.21
  -6  -8   3   48.02    3.21
   6  -8  -3   45.37    3.32
  -6   8   3   44.96    2.60
   6   8  -3   46.64    2.59
  -4  -8   3    1.09    1.30
   4  -8  -3    1.78    1.31
   4   8  -3   -0.81    1.01
  -4   8   3    2.13    1.12
  -2  -8   3   25.50    2.31
   2  -8  -3   27.12    2.55
   2   8  -3   25.57    1.94
  -2   8   3   27.90    1.97
   0  -8   3   15.42    2.04
   0  -8  -3   15.92    2.15
   0   8   3   15.21    1.58
   0   8  -3   15.15    1.59
   2  -8   3   15.75    2.33
  -2  -8  -3   12.71    2.05
  -2   8  -3   15.18    1.65
   2   8   3   14.46    1.75
 -14   0   4    4.66    1.45
  14   0  -4    7.85    1.90
 -12   0   4   98.83    3.82
  12   0  -4   96.27    4.09
  10   0  -4   64.85    2.94
 -10   0   4   63.85    2.70
   8   0  -4  198.51    5.62
  -8   0   4  198.71    5.28
  -6   0   4    2.86    0.54
   6   0  -4    3.12    0.40
  -6   0   4    2.99    0.44
  -6   0   4    4.08    0.69
   6   0  -4    3.96    0.73
  -4   0   4  239.98    5.47
   4   0  -4  236.96    5.53
  -4   0   4  229.84    5.46
  -4   0   4  240.55    5.38
   4   0  -4  242.91    5.48
   4   0  -4  242.20    5.38
   2   0  -4   27.38    0.98
   2   0  -4   27.19    0.99
  -2   0   4   26.36    0.97
  -2   0   4   27.68    1.01
   0   0   4  413.28    9.22
   0   0  -4  427.76    9.26
   0   0  -4  424.93    9.15
   0   0   4  423.06    9.16
   0   0  -4  432.47    9.12
   0   0   4  428.93    9.13
  -2   0  -4   69.46    1.91
   2   0   4   70.03    1.93
  -2   0  -4   70.96    2.19
   2   0   4   72.91    2.53
  -2   0  -4   69.19    2.19
   2   0   4   72.07    2.17
   4   0   4  174.97    4.80
  -4   0  -4  165.36    4.49
  -4   0  -4  161.97    4.63
  -6   0  -4   56.06    2.37
   6   0   4   56.64    2.58
   8   0   4   24.75    1.97
  -8   0  -4   31.19    1.95
 -10   0  -4   31.78    2.20
  10   0   4   29.19    2.42
 -12   0  -4   12.55    1.92
  12   0   4   16.44    2.24
 -15  -1   4   69.71    3.74
  15  -1  -4   66.78    3.98
 -15   1   4   78.37    3.76
  15   1  -4   78.51    4.34
  13  -1  -4   21.23    2.19
 -13  -1   4   19.90    2.02
  13   1  -4   21.49    2.24
 -13   1   4   21.27    1.90
  11  -1  -4   46.59    2.68
 -11  -1   4   43.88    2.41
 -11   1   4   44.52    2.35
  11   1  -4   46.06    2.63
   9  -1  -4   57.70    2.72
  -9  -1   4   62.72    2.59
  -9   1   4   61.70    2.49
   9   1  -4   57.87    2.61
   7  -1  -4  257.64    6.55
  -7  -1   4  237.65    6.32
   7  -1  -4  250.71    5.64
  -7  -1   4  233.25    5.77
  -7  -1   4  255.20    6.26
  -7   1   4  251.44    6.14
   7   1  -4  251.15    6.40
  -7   1   4  253.77    5.64
  -5  -1   4   85.24    2.31
  -5  -1   4   83.31    2.50
  -5  -1   4   83.70    2.48
   5  -1  -4   83.33    2.66
   5  -1  -4   86.62    2.30
   5   1  -4   90.08    2.58
   5   1  -4   82.60    2.24
  -5   1   4   89.06    2.70
  -5   1   4   86.88    2.32
  -5   1   4   90.11    2.41
  -3  -1   4  633.89   13.59
   3  -1  -4  644.21   13.41
   3  -1  -4  640.57   13.53
   3  -1  -4  632.37   13.70
  -3  -1   4  630.25   13.55
   3   1  -4  618.29   13.47
  -3   1   4  660.38   13.43
  -3   1   4  633.87   13.69
   3   1  -4  638.82   13.62
  -3   1   4  650.20   13.54
   1  -1  -4  230.09    5.15
  -1  -1   4  224.54    5.19
   1  -1  -4  228.91    5.00
  -1  -1   4  225.83    5.19
   1  -1  -4  229.18    5.26
  -1   1   4  228.86    5.31
   1   1  -4  229.02    5.23
  -1   1   4  219.84    5.22
  -1   1   4  216.41    4.99
   1   1  -4  220.73    5.09
   1  -1   4  582.38   12.10
  -1  -1  -4  557.28   12.04
  -1  -1  -4  576.26   12.32
   1  -1   4  569.89   12.08
  -1  -1  -4  572.69   12.43
   1   1   4  595.53   12.52
   1   1   4  563.12   12.21
   1   1   4  557.35   12.09
  -1   1  -4  559.10   12.04
  -1   1  -4  549.32   12.26
  -1   1  -4  539.04   11.99
  -3  -1  -4  170.31    4.69
   3  -1   4  172.92    4.10
  -3  -1  -4  171.74    4.06
   3  -1   4  176.81    4.58
  -3  -1  -4  175.72    4.44
  -3   1  -4  177.56    4.54
   3   1   4  167.62    4.35
  -3   1  -4  166.34    4.00
   3   1   4  174.71    4.81
  -5  -1  -4  279.53    7.03
   5  -1   4  286.13    7.31
   5   1   4  289.46    7.53
  -5   1  -4  276.17    7.06
  -7  -1  -4   40.97    2.00
   7  -1   4   40.14    2.23
  -7   1  -4   41.33    2.09
   7   1   4   38.69    2.33
  -9  -1  -4  127.51    4.45
   9  -1   4  123.03    4.77
  -9   1  -4  133.87    4.51
   9   1   4  124.42    4.95
 -11  -1  -4    5.20    1.38
  11  -1   4    5.07    1.43
  11   1   4    3.74    1.49
 -11   1  -4    5.86    1.33
 -14  -2   4   45.38    2.98
  14  -2  -4   46.97    3.17
 -14   2   4   47.56    2.85
  14   2  -4   42.65    3.18
 -12  -2   4    1.38    1.11
  12  -2  -4    1.37    0.98
  12   2  -4    1.32    0.98
 -12   2   4    1.83    0.95
 -10  -2   4   90.43    3.40
  10  -2  -4   87.86    3.64
 -10   2   4   87.05    3.22
  10   2  -4   87.78    3.67
   8  -2  -4   22.02    0.99
   8  -2  -4   22.49    1.56
  -8  -2   4   22.28    1.48
  -8  -2   4   24.86    1.03
  -8  -2   4   18.82    1.06
   8   2  -4   25.78    1.64
  -8   2   4   23.98    1.07
  -8   2   4   24.27    1.38
  -6  -2   4  110.74    2.98
   6  -2  -4  118.44    3.65
   6  -2  -4  114.64    3.03
  -6  -2   4  115.91    3.05
  -6  -2   4  113.41    3.43
  -6   2   4  118.82    3.22
   6   2  -4  118.11    3.32
  -6   2   4  117.88    3.09
  -6   2   4  116.34    3.07
   6   2  -4  117.46    3.52
  -4  -2   4   51.98    1.69
  -4  -2   4   50.40    1.62
   4  -2  -4   51.40    2.00
   4  -2  -4   49.51    1.64
  -4  -2   4   47.74    1.63
  -4  -2   4   50.01    1.73
  -4   2   4   48.79    1.92
   4   2  -4   49.34    1.71
   4   2  -4   50.35    1.75
  -4   2   4   49.52    1.67
  -2  -2   4  220.59    5.09
   2  -2  -4  218.86    5.11
   2  -2  -4  221.47    5.44
  -2  -2   4  216.66    5.12
   2   2  -4  219.73    5.14
  -2   2   4  207.55    6.56
  -2   2   4  218.48    5.14
   0  -2  -4    3.79    0.71
   0  -2   4    2.89    0.50
   0  -2   4    2.97    0.50
   0  -2  -4    3.44    0.63
   0  -2  -4    2.65    0.49
   0  -2   4    2.95    0.49
   0   2  -4    3.35    0.59
   0   2   4    2.50    0.49
   2  -2   4  104.28    3.00
   2  -2   4  102.63    2.95
   2  -2   4  107.04    2.81
  -2  -2  -4  104.00    2.81
  -2  -2  -4  101.58    3.27
  -2  -2  -4   99.31    2.74
   2  -2   4  105.03    2.75
   2   2   4   99.18    2.76
  -2   2  -4  103.19    3.01
  -2   2  -4  105.69    2.91
   2   2   4  103.10    2.79
   2   2   4  107.94    3.39
   4  -2   4    6.52    0.88
   4  -2   4    4.83    0.55
  -4  -2  -4    5.79    0.71
  -4  -2  -4    5.35    0.49
   4  -2   4    6.01    0.55
   4   2   4    4.95    0.55
  -4   2  -4    5.23    0.82
   4   2   4    7.61    1.23
   6  -2   4   56.69    1.80
  -6  -2  -4   59.56    2.40
   6  -2   4   56.58    1.78
   6  -2   4   61.35    2.69
  -6   2  -4   61.21    2.45
   6   2   4   56.72    2.82
  -8  -2  -4    1.45    0.75
   8  -2   4    0.56    0.73
  -8   2  -4    1.33    0.69
   8   2   4    1.92    0.94
  10  -2   4   58.02    3.27
 -10  -2  -4   59.54    2.94
  10   2   4   59.06    3.84
 -10   2  -4   56.69    2.96
 -12  -2  -4    9.79    1.69
  12  -2   4   10.37    2.02
 -12   2  -4    7.81    1.47
  12   2   4    6.68    1.91
  13  -3  -4   28.01    2.59
 -13  -3   4   27.14    2.40
  13   3  -4   24.41    2.59
 -13   3   4   29.32    2.15
 -11  -3   4   30.64    2.21
  11  -3  -4   31.49    2.34
 -11   3   4   25.37    1.76
  11   3  -4   27.15    2.18
  -9  -3   4  154.72    4.05
  -9  -3   4  156.81    4.83
   9  -3  -4  156.72    5.24
  -9   3   4  155.83    4.07
   9   3  -4  164.20    6.22
  -9   3   4  160.04    4.53
   7  -3  -4   49.64    2.38
  -7  -3   4   47.08    1.72
   7   3  -4   49.32    2.22
  -7   3   4   47.34    1.71
  -7   3   4   43.44    1.65
  -7   3   4   44.55    1.76
   5  -3  -4  311.50    7.84
  -5  -3   4  304.07    7.41
  -5  -3   4  309.93    7.19
   5   3  -4  308.13    7.28
   5   3  -4  304.49    7.48
  -5   3   4  313.13    7.18
  -3  -3   4   41.07    1.54
  -3  -3   4   39.85    1.51
  -3  -3   4   40.53    1.57
   3  -3  -4   40.81    1.91
  -3   3   4   41.36    1.60
   3   3  -4   41.25    1.56
  -1  -3   4  321.90    7.44
  -1  -3   4  307.52    7.33
  -1  -3   4  324.14    7.29
   1  -3  -4  322.86    7.88
  -1   3   4  338.04    7.49
   1   3  -4  315.16    7.26
   1   3  -4  319.46    7.35
   1  -3   4   32.66    1.39
  -1  -3  -4   31.90    1.67
   1  -3   4   28.39    1.33
   1  -3   4   32.74    1.35
  -1   3  -4   32.37    1.42
  -1   3  -4   31.92    1.34
   1   3   4   32.14    1.37
  -3  -3  -4  395.73    8.87
   3  -3   4  399.92    9.30
   3  -3   4  410.44    8.94
  -3   3  -4  386.77    9.19
   3   3   4  370.94    8.76
  -3   3  -4  388.21    9.15
   3   3   4  394.26    8.86
   5  -3   4   97.14    3.47
  -5  -3  -4   98.11    3.11
   5  -3   4   97.41    2.80
   5   3   4   92.77    2.73
   5   3   4   93.50    3.75
  -5   3  -4   96.81    3.53
  -7  -3  -4  117.07    3.88
   7  -3   4  114.30    4.22
   7  -3   4  117.58    3.18
   7   3   4  112.61    4.56
  -7   3  -4  116.00    3.90
   9  -3   4   17.86    1.94
  -9  -3  -4   17.14    1.66
   9   3   4   18.62    2.08
  -9   3  -4   16.29    1.62
 -11  -3  -4   46.88    2.87
  11  -3   4   49.40    3.21
  11   3   4   52.78    3.65
 -11   3  -4   53.13    2.95
  12  -4  -4    7.10    1.67
 -12   4   4    6.32    1.30
  12   4  -4    7.34    1.61
 -10  -4   4   15.64    1.16
  10  -4  -4   15.28    1.79
 -10  -4   4   18.53    1.82
  10   4  -4   14.95    1.64
 -10   4   4   15.23    1.39
 -10   4   4   14.43    1.10
  -8  -4   4   42.08    2.17
  -8  -4   4   41.20    1.79
   8  -4  -4   42.13    2.44
  -8   4   4   42.36    1.80
  -8   4   4   41.25    1.76
  -6  -4   4   29.07    1.42
   6  -4  -4   29.36    1.92
   6   4  -4   27.26    1.45
  -6   4   4   25.36    1.38
   4  -4  -4   21.67    1.56
  -4  -4   4   20.94    1.35
  -4  -4   4   22.01    1.27
   4   4  -4   19.95    1.17
  -4   4   4   21.44    1.25
   2  -4  -4   63.81    2.64
  -2  -4   4   59.27    2.18
  -2  -4   4   62.10    2.20
  -2   4   4   64.19    2.23
   2   4  -4   61.01    2.05
   0  -4   4   15.12    1.11
   0  -4  -4   17.40    1.35
   0   4  -4   17.66    1.08
   0   4   4   15.65    1.04
   0   4  -4   17.05    1.00
  -2  -4  -4   24.83    1.77
   2  -4   4   26.89    1.51
   2   4   4   25.74    1.33
  -2   4  -4   26.69    1.36
  -4  -4  -4    9.33    1.53
   4  -4   4    7.49    1.03
   4  -4   4    6.73    0.84
   4   4   4    7.73    0.88
  -4   4  -4    7.77    0.95
  -6  -4  -4   23.30    1.49
   6  -4   4   24.44    1.78
   6  -4   4   26.14    1.37
   6   4   4   24.61    1.31
  -6   4  -4   23.58    1.60
   6   4   4   18.89    1.95
   8  -4   4    4.84    0.77
  -8  -4  -4    5.64    0.96
   8  -4   4    6.93    1.46
  -8   4  -4    6.42    1.14
   8   4   4    4.04    1.26
 -10  -4  -4   19.42    1.90
  10  -4   4   21.30    2.37
 -10   4  -4   17.15    1.84
  10   4   4   18.58    2.30
 -11  -5   4   80.43    2.81
  11  -5  -4   72.66    3.92
 -11  -5   4   77.83    3.72
 -11   5   4   77.53    2.74
 -11   5   4   76.74    2.96
  11   5  -4   77.21    3.89
   9  -5  -4    3.97    1.22
  -9  -5   4    4.22    1.11
  -9  -5   4    4.04    0.94
  -9   5   4    5.43    0.90
  -7  -5   4   69.88    2.64
   7  -5  -4   75.12    3.47
  -7   5   4   74.29    2.66
   5  -5  -4    9.84    1.36
  -5  -5   4   11.55    1.26
   5   5  -4   11.09    1.01
  -5   5   4   10.51    1.11
   3  -5  -4  186.14    5.72
  -3  -5   4  175.92    5.11
   3   5  -4  181.42    4.98
  -3   5   4  187.80    5.03
   3   5  -4  179.74    4.71
   1  -5  -4   26.03    1.86
  -1  -5   4   25.28    1.55
   1   5  -4   28.26    1.35
   1   5  -4   27.07    1.53
  -1   5   4   29.32    1.58
   1  -5   4  166.27    4.83
  -1  -5  -4  163.69    5.36
  -1   5  -4  169.88    4.65
  -1   5  -4  162.08    4.40
   1   5   4  157.74    4.59
   3  -5   4   32.25    1.92
  -3  -5  -4   28.44    2.10
  -3   5  -4   28.90    1.57
   3   5   4   25.75    1.51
   5  -5   4  129.58    4.55
  -5  -5  -4  120.77    4.90
   5  -5   4  133.83    3.93
   5   5   4  129.38    3.82
  -5   5  -4  129.88    4.09
  -7  -5  -4    6.52    1.05
  -7  -5  -4    8.14    1.77
   7  -5   4    9.22    1.51
   7  -5   4   11.11    1.14
   7   5   4    7.60    1.00
  -7   5  -4    8.84    1.29
   9  -5   4  110.72    3.51
  -9  -5  -4  105.52    4.03
   9  -5   4  113.28    4.94
   9   5   4  109.71    3.43
  -9   5  -4  110.03    5.29
 -10  -6   4   16.64    2.24
 -10  -6   4   13.65    1.57
 -10  -6   4   15.20    1.98
  10  -6  -4   15.11    2.00
 -10   6   4   17.57    1.44
   8  -6  -4   47.48    3.29
  -8  -6   4   37.91    2.64
  -8  -6   4   41.54    2.10
  -8  -6   4   42.00    2.45
  -8   6   4   39.07    2.01
   6  -6  -4    8.41    1.62
  -6  -6   4    8.81    1.42
  -6   6   4    9.56    1.27
   4  -6  -4   44.29    2.65
  -4  -6   4   43.81    2.34
   4   6  -4   44.47    1.89
   4   6  -4   45.36    2.17
  -4   6   4   46.70    2.18
   2  -6  -4    1.05    0.86
  -2  -6   4    0.34    0.66
   2   6  -4    2.21    0.50
  -2   6   4    0.68    0.69
   2   6  -4    0.17    0.59
   0  -6   4   47.44    2.43
   0  -6  -4   45.35    2.68
   0   6   4   49.29    2.22
   0   6  -4   45.57    2.19
   0   6  -4   47.26    1.90
  -2  -6  -4    1.93    1.08
   2  -6   4    3.52    0.89
   2   6   4    2.57    0.88
  -2   6  -4    4.54    0.83
  -2   6  -4    3.93    0.99
   4  -6   4   18.87    1.62
  -4  -6  -4   15.86    1.90
   4   6   4   17.99    1.43
  -4   6  -4   17.20    1.45
  -6  -6  -4    2.51    1.20
   6  -6   4    1.70    1.18
   6  -6   4    3.21    0.99
   6   6   4    4.09    1.02
  -6   6  -4    2.83    1.13
   8  -6   4   15.41    2.05
   8  -6   4   12.61    1.59
  -8  -6  -4    9.65    2.01
  -8  -6  -4    9.75    1.31
  -8   6  -4   10.73    1.53
   8   6   4   10.83    1.49
  -9  -7   4   23.25    2.58
  -9  -7   4   21.99    3.07
  -9  -7   4   24.56    2.37
   9  -7  -4   22.58    2.52
  -9   7   4   26.81    1.92
   7  -7  -4    5.05    1.50
  -7  -7   4    4.90    1.43
  -7  -7   4    4.66    1.18
  -7   7   4    2.91    1.82
  -5  -7   4   14.00    1.75
   5   7  -4   10.14    1.26
  -5   7   4   12.62    1.42
   3  -7  -4    6.44    1.56
  -3  -7   4    9.51    1.55
  -3   7   4   11.34    1.40
   3   7  -4   11.12    1.39
   1  -7  -4   42.21    2.86
  -1  -7   4   47.10    2.60
   1   7  -4   45.72    2.32
  -1   7   4   47.93    2.37
   1   7  -4   44.22    1.89
  -1  -7  -4   13.73    1.87
   1  -7   4   10.93    1.73
   1   7   4   15.46    1.60
  -1   7  -4   13.27    1.51
  -1   7  -4   13.27    1.18
  -3  -7  -4   31.08    2.67
   3  -7   4   29.88    2.41
  -3   7  -4   33.49    1.81
   3   7   4   28.53    1.94
   5  -7   4   13.27    1.85
  -5  -7  -4   10.30    1.87
  -5   7  -4   12.01    1.49
   5   7   4   11.14    1.64
  -4  -8   4   21.98    2.19
   4  -8  -4   23.57    2.29
  -4   8   4   21.24    1.83
   2  -8  -4   17.77    2.22
  -2  -8   4   19.88    1.98
   2   8  -4   17.34    1.75
  -2   8   4   13.48    1.71
   0  -8   4   25.60    2.29
   0  -8  -4   29.55    2.60
   0   8   4   30.09    2.13
   0   8  -4   31.99    2.22
   2  -8   4   29.35    2.51
  -2  -8  -4   28.59    2.65
   2   8   4   29.23    2.16
 -14   0   5    0.27    1.19
  14   0  -5    0.99    1.35
  12   0  -5    2.99    1.10
 -12   0   5   -0.25    0.96
 -10   0   5    1.07    0.69
  10   0  -5    1.27    0.87
  -8   0   5    2.89    0.69
   8   0  -5    3.04    0.76
  -8   0   5    3.28    0.50
  -6   0   5    0.69    0.31
   6   0  -5    1.02    0.47
  -6   0   5    0.49    0.40
   6   0  -5    0.76    0.39
  -6   0   5    0.04    0.35
   6   0  -5   -0.03    0.26
  -4   0   5   -0.06    0.28
   4   0  -5   -0.04    0.28
   4   0  -5    0.42    0.28
   4   0  -5    0.17    0.24
  -4   0   5    0.26    0.31
  -2   0   5    0.42    0.27
   2   0  -5    0.59    0.26
  -2   0   5    0.30    0.25
   2   0  -5    0.59    0.29
   0   0  -5    0.27    0.27
   0   0  -5    0.30    0.20
   0   0   5    0.43    0.28
   0   0  -5    0.22    0.32
   0   0   5    0.22    0.24
   0   0   5    0.36    0.26
   2   0   5    0.25    0.29
   2   0   5    0.41    0.35
  -2   0  -5    0.71    0.32
  -2   0  -5    0.24    0.27
   2   0   5    0.69    0.39
  -2   0  -5    0.34    0.43
  -4   0  -5    0.40    0.38
   4   0   5    0.51    0.44
   4   0   5    0.55    0.29
  -4   0  -5    0.71    0.25
  -6   0  -5    1.70    0.63
   6   0   5    1.27    0.68
  -8   0  -5    1.14    0.70
   8   0   5    1.24    0.80
  10   0   5    0.47    0.96
 -15  -1   5   31.73    2.70
  15  -1  -5   35.05    2.97
  15   1  -5   39.49    3.11
 -15   1   5   35.82    2.68
  13  -1  -5    8.44    1.65
 -13  -1   5    6.18    1.48
 -13   1   5    5.20    1.26
  13   1  -5    5.20    1.45
  11  -1  -5   34.02    2.25
 -11  -1   5   31.77    2.15
 -11   1   5   33.70    2.03
  11   1  -5   36.18    2.27
   9  -1  -5   11.24    0.96
  -9  -1   5    9.92    1.16
   9  -1  -5   12.72    1.26
  -9   1   5   12.38    1.19
   9   1  -5   13.78    1.33
   7  -1  -5   40.49    1.90
   7  -1  -5   39.11    1.38
  -7  -1   5   37.84    1.36
  -7  -1   5   36.18    1.65
   7   1  -5   42.39    1.80
   7   1  -5   37.57    1.64
   7   1  -5   32.00    1.38
  -7   1   5   37.77    1.39
  -7   1   5   36.66    1.63
   5  -1  -5   40.01    1.68
  -5  -1   5   38.99    1.44
   5  -1  -5   40.87    1.46
   5  -1  -5   38.75    1.40
  -5  -1   5   38.93    1.41
  -5  -1   5   41.10    1.56
   5   1  -5   39.08    1.56
  -5   1   5   38.79    1.41
   5   1  -5   41.42    1.49
  -5   1   5   38.68    1.97
  -5   1   5   40.56    1.80
   5   1  -5   36.52    1.44
   3  -1  -5  200.39    4.96
   3  -1  -5  207.15    5.12
  -3  -1   5  202.99    4.92
   3  -1  -5  207.98    4.75
  -3  -1   5  210.82    4.92
  -3   1   5  206.27    4.97
   3   1  -5  208.46    4.95
  -3   1   5  207.86    4.90
  -3   1   5  208.52    4.75
   1  -1  -5   53.96    1.81
  -1  -1   5   49.89    1.86
  -1  -1   5   54.26    1.73
   1  -1  -5   56.25    1.63
   1   1  -5   55.75    1.80
  -1   1   5   55.59    1.73
  -1   1   5   51.91    1.59
  -1  -1  -5   31.25    1.30
   1  -1   5   31.37    1.24
  -1  -1  -5   32.34    1.43
   1  -1   5   30.88    1.35
  -1   1  -5   32.57    1.21
  -1   1  -5   33.33    1.31
   1   1   5   30.50    1.48
   1   1   5   30.74    1.23
  -1   1  -5   31.02    1.39
   1   1   5   28.97    1.34
   3  -1   5   43.02    1.84
   3  -1   5   45.07    1.52
  -3  -1  -5   45.41    1.78
   3   1   5   45.54    2.03
  -3   1  -5   44.51    1.58
  -3   1  -5   43.96    1.74
  -3   1  -5   45.73    1.86
   3   1   5   42.05    1.48
   5  -1   5  105.44    3.59
  -5  -1  -5  103.16    3.37
  -5   1  -5  103.78    3.50
   5   1   5  109.56    3.83
   5   1   5  103.10    2.74
   7  -1   5   21.44    1.71
  -7  -1  -5   19.01    1.52
   7   1   5   21.31    1.80
  -7   1  -5   20.91    1.59
   9  -1   5   27.71    2.23
  -9  -1  -5   31.21    2.09
   9   1   5   26.49    2.32
  -9   1  -5   29.81    2.08
  11  -1   5   21.64    2.33
 -11  -1  -5   21.47    2.07
 -11   1  -5   21.02    2.03
  11   1   5   20.85    2.44
 -14  -2   5    6.52    1.57
  14  -2  -5    5.61    1.67
  14   2  -5    3.37    1.56
 -14   2   5    4.84    1.32
  12  -2  -5    7.13    1.59
 -12  -2   5    7.56    1.38
 -12   2   5    9.53    1.48
  12   2  -5    6.77    1.46
 -10  -2   5   20.68    1.71
  10  -2  -5   21.66    1.85
 -10   2   5   21.21    1.56
 -10   2   5   17.57    1.07
  10   2  -5   21.07    1.75
  -8  -2   5   93.54    2.68
   8  -2  -5   92.47    3.42
   8  -2  -5   94.73    2.67
  -8  -2   5   90.27    2.59
  -8   2   5   96.15    3.03
   8   2  -5   95.36    3.31
  -8   2   5   95.59    2.70
   6  -2  -5   37.63    1.86
  -6  -2   5   37.06    1.38
  -6  -2   5   36.52    1.44
   6  -2  -5   34.96    1.39
  -6   2   5   36.84    1.37
  -6   2   5   37.97    1.46
   6   2  -5   39.59    1.66
   6   2  -5   38.46    1.67
  -6   2   5   38.24    1.48
  -4  -2   5  137.35    3.58
   4  -2  -5  138.74    3.93
   4  -2  -5  136.88    3.57
  -4  -2   5  129.36    3.60
   4  -2  -5  142.96    3.32
  -4   2   5  143.37    3.33
   4   2  -5  137.76    3.67
  -4   2   5  135.44    3.59
  -4   2   5  132.57    3.83
  -2  -2   5  111.80    3.03
  -2  -2   5  106.38    3.02
   2  -2  -5  111.26    3.26
   2  -2  -5  113.16    3.01
  -2   2   5  106.96    3.20
  -2   2   5  112.66    3.03
   2   2  -5  107.19    3.02
   0  -2  -5   72.84    2.52
   0  -2   5   71.10    2.26
   0  -2  -5   66.09    2.40
   0  -2   5   72.52    2.20
   0  -2  -5   70.80    2.16
   0   2  -5   71.14    2.31
   0   2   5   69.73    2.18
   2  -2   5   82.24    2.38
   2  -2   5   85.04    2.59
  -2  -2  -5   81.50    2.43
  -2  -2  -5   85.14    2.51
   2  -2   5   84.64    2.45
   2   2   5   83.31    2.46
  -2   2  -5   84.00    2.70
   2   2   5   78.47    2.40
  -2   2  -5   84.02    2.50
   2   2   5   89.38    3.06
   4  -2   5   26.65    1.55
   4  -2   5   25.09    1.11
   4  -2   5   24.74    1.12
  -4  -2  -5   23.89    1.32
  -4  -2  -5   23.77    1.07
   4   2   5   27.09    1.72
   4   2   5   25.27    1.15
  -4   2  -5   26.55    1.47
  -6  -2  -5    9.40    1.12
   6  -2   5    9.14    1.39
   6  -2   5    7.96    0.70
   6  -2   5    7.84    0.72
  -6   2  -5    9.83    1.07
   6   2   5    7.29    1.29
   8  -2   5    6.73    1.29
  -8  -2  -5    6.37    1.16
  -8   2  -5    7.33    1.29
   8   2   5    6.30    1.46
  10  -2   5    2.90    1.27
  10   2   5    1.05    1.14
 -10   2  -5    1.17    0.88
 -13  -3   5   34.83    2.63
  13  -3  -5   35.68    2.82
 -13   3   5   39.39    2.41
  13   3  -5   39.58    2.87
 -11  -3   5    5.46    1.34
  11  -3  -5    6.83    1.47
 -11   3   5    4.42    0.99
  11   3  -5    6.77    1.29
  -9  -3   5   54.78    1.97
  -9  -3   5   57.08    2.52
   9  -3  -5   53.30    2.75
  -9   3   5   52.56    1.95
  -9   3   5   51.86    2.22
   9   3  -5   53.66    2.59
   7  -3  -5   17.34    1.47
  -7  -3   5   15.59    1.01
   7   3  -5   17.53    1.27
   7   3  -5   18.06    1.22
  -7   3   5   16.51    1.06
  -7   3   5   15.23    0.90
  -7   3   5   17.46    1.07
  -5  -3   5    7.44    0.76
  -5  -3   5    5.44    0.65
   5  -3  -5    5.33    1.01
   5   3  -5    6.37    0.85
  -5   3   5    5.45    0.68
  -3  -3   5   36.14    1.53
   3  -3  -5   37.25    1.80
   3   3  -5   34.95    1.51
  -3   3   5   33.78    1.49
   1  -3  -5   50.22    2.15
  -1  -3   5   55.97    1.96
  -1   3   5   51.81    1.90
   1   3  -5   50.84    1.87
   1  -3   5   34.00    1.45
   1  -3   5   31.42    1.41
  -1  -3  -5   34.70    1.86
   1   3   5   30.87    1.40
  -1   3  -5   29.79    1.47
  -1   3  -5   30.24    1.32
   3  -3   5   39.92    1.58
   3  -3   5   35.91    1.72
  -3  -3  -5   33.61    1.50
  -3   3  -5   36.69    1.73
  -3   3  -5   33.36    1.81
   3   3   5   38.04    1.55
   3   3   5   34.82    1.45
   5  -3   5   32.87    1.86
  -5  -3  -5   30.73    1.64
   5  -3   5   29.72    1.38
  -5   3  -5   30.90    1.72
   5   3   5   30.75    1.38
   5   3   5   32.36    2.12
   7  -3   5   12.14    1.50
  -7  -3  -5   13.73    1.36
   7  -3   5   12.86    0.93
  -7   3  -5   15.75    1.41
   7   3   5   14.39    1.74
  -9  -3  -5    7.68    1.38
   9  -3   5    9.88    1.79
   9   3   5    5.00    2.25
  -9   3  -5    9.49    1.60
  12  -4  -5   -0.45    1.07
  12   4  -5    1.58    1.24
 -12   4   5    0.11    1.01
 -10  -4   5   26.26    2.05
  10  -4  -5   24.76    2.10
 -10  -4   5   27.10    1.44
 -10   4   5   23.20    1.91
  10   4  -5   28.06    2.04
  -8  -4   5   32.88    1.70
   8  -4  -5   39.08    2.32
  -8   4   5   36.14    1.61
  -8   4   5   36.39    1.94
   8   4  -5   38.04    2.14
   6  -4  -5  121.99    4.27
  -6  -4   5  126.01    3.67
  -6  -4   5  122.03    3.88
  -6   4   5  121.47    3.59
   6   4  -5  123.31    3.69
  -4  -4   5  127.37    3.70
   4  -4  -5  134.35    4.36
  -4  -4   5  123.76    3.69
  -4  -4   5  130.13    3.73
   4   4  -5  126.64    3.65
  -4   4   5  131.69    3.74
  -2  -4   5   57.51    2.30
  -2  -4   5   61.87    2.10
  -2  -4   5   63.07    2.26
   2  -4  -5   63.54    2.65
  -2   4   5   62.84    2.27
   2   4  -5   59.74    2.15
   0  -4   5   17.87    1.13
   0  -4   5   15.73    1.11
   0  -4  -5   20.34    1.47
   0   4   5   17.69    1.14
   0   4  -5   17.86    1.11
   0   4  -5   16.48    1.02
   2  -4   5  107.56    3.47
  -2  -4  -5  114.41    4.10
   2  -4   5  113.71    3.42
  -2   4  -5  116.23    3.50
   2   4   5  111.57    3.39
   4  -4   5   99.99    3.14
  -4  -4  -5  101.96    3.08
  -4  -4  -5   98.70    4.00
   4  -4   5  102.83    3.59
  -4   4  -5  102.57    3.44
   4   4   5   96.94    3.06
  -6  -4  -5   39.93    2.32
   6  -4   5   41.02    2.31
   6  -4   5   38.77    2.03
  -6   4  -5   41.52    2.14
   6   4   5   38.20    1.73
   8  -4   5    0.53    0.69
   8  -4   5    1.76    0.91
  -8  -4  -5    1.09    0.80
   8   4   5    3.25    2.36
  -8   4  -5    0.46    0.84
   8   4   5    1.73    0.73
  10  -4   5    9.36    1.74
 -10  -4  -5    8.15    1.48
  10   4   5    5.38    1.65
 -10   4  -5    8.59    1.59
 -11  -5   5    5.25    1.06
 -11  -5   5    9.54    1.69
  11  -5  -5    8.11    1.75
 -11   5   5    6.56    1.18
  11   5  -5    7.47    1.79
 -11   5   5    7.45    1.06
  -9  -5   5   37.06    2.36
  -9  -5   5   36.75    1.91
   9  -5  -5   37.43    2.64
  -9   5   5   37.16    1.81
  -7  -5   5   20.75    1.94
  -7  -5   5   19.54    1.44
   7  -5  -5   20.25    1.90
   7   5  -5   17.63    1.44
  -7   5   5   20.54    1.43
   5  -5  -5   38.07    2.32
  -5  -5   5   38.23    1.85
  -5  -5   5   36.30    1.93
   5   5  -5   39.27    1.75
  -5   5   5   37.37    1.82
   3  -5  -5   23.46    1.75
  -3  -5   5   21.16    1.38
  -3  -5   5   22.30    1.45
  -3   5   5   23.21    1.45
   3   5  -5   20.35    1.23
   1  -5  -5  160.49    5.26
  -1  -5   5  163.78    4.65
   1   5  -5  163.55    4.41
  -1   5   5  162.18    4.62
   1  -5   5   11.55    1.15
   1  -5   5   10.87    1.20
  -1  -5  -5   12.16    1.49
  -1   5  -5   11.52    1.04
   1   5   5   10.36    1.07
  -3  -5  -5   22.49    2.02
   3  -5   5   24.19    1.66
   3  -5   5   26.36    1.48
   3   5   5   26.31    1.55
  -3   5  -5   24.43    1.52
   5  -5   5   34.55    1.77
  -5  -5  -5   30.07    2.48
   5  -5   5   33.70    2.14
   5   5   5   31.18    1.71
  -5   5  -5   32.47    1.91
  -7  -5  -5   27.78    2.59
   7  -5   5   27.55    2.33
   7  -5   5   31.12    1.76
  -7  -5  -5   31.98    1.82
   7   5   5   30.44    1.63
  -7   5  -5   28.35    1.95
   9  -5   5   16.23    1.62
  -9  -5  -5   16.75    1.79
   9  -5   5   18.69    2.21
  -9   5  -5   16.18    1.87
 -10  -6   5    8.40    1.96
 -10  -6   5    9.57    1.37
 -10  -6   5    7.81    1.47
  10  -6  -5    5.80    1.66
 -10   6   5    7.98    1.28
  -8  -6   5   18.75    1.53
  -8  -6   5   19.39    2.00
  -8   6   5   15.62    1.49
  -6  -6   5   21.28    1.80
   6  -6  -5   17.38    1.97
  -6  -6   5   19.14    1.58
  -6   6   5   17.69    1.48
   6   6  -5   19.50    1.45
   4  -6  -5   18.74    1.88
  -4  -6   5   19.78    1.57
  -4   6   5   20.56    1.54
   2  -6  -5   16.21    1.76
  -2  -6   5   14.61    1.44
  -2   6   5   17.27    1.47
   2   6  -5   14.80    1.14
   0  -6  -5   31.72    2.35
   0  -6   5   35.62    2.06
   0   6   5   33.99    1.90
   0   6  -5   32.26    1.62
   2  -6   5    4.83    0.96
   2  -6   5    5.81    1.14
  -2  -6  -5    6.15    1.43
  -2   6  -5    6.57    1.00
   2   6   5    6.82    1.12
  -4  -6  -5   15.02    2.03
   4  -6   5   15.09    1.44
   4  -6   5   14.69    1.70
  -4   6  -5   13.06    1.37
   4   6   5   15.44    1.47
   6  -6   5   37.32    2.17
   6  -6   5   36.58    2.64
  -6  -6  -5   35.92    2.91
  -6   6  -5   41.76    2.39
   6   6   5   39.33    2.03
   9  -7  -5   11.34    2.02
  -9  -7   5   16.49    2.25
  -9  -7   5   20.79    2.27
  -9  -7   5   14.45    1.86
  -9   7   5   12.78    1.61
  -7  -7   5   50.25    3.33
   7  -7  -5   45.00    3.00
  -7  -7   5   43.50    2.81
  -7   7   5   50.37    2.45
  -5  -7   5   16.76    2.64
  -5  -7   5   21.56    1.80
   5  -7  -5   19.71    2.10
   5   7  -5   16.05    1.44
  -3  -7   5   95.66    3.74
   3  -7  -5  102.45    4.89
  -3   7   5  101.23    4.04
   3   7  -5  100.77    3.25
  -1  -7   5   13.83    1.55
   1   7  -5   13.59    1.27
  -1   7   5   13.24    1.52
  -1  -7  -5   79.36    4.27
   1  -7   5   79.29    3.40
  -1   7  -5   79.08    2.88
   1   7   5   84.75    3.43
   3  -7   5    3.79    1.18
  -3  -7  -5    3.56    1.39
   3  -7   5    4.22    1.22
   5  -7   5   39.43    2.81
  -5  -7  -5   48.45    3.41
   5  -7   5   52.04    2.67
  -5   7  -5   48.30    2.52
   5   7   5   48.18    2.74
  -4  -8   5    2.61    1.30
   4  -8  -5    0.68    1.36
  -4   8   5    0.61    1.11
   4   8  -5    1.36    0.91
  -2  -8   5    9.79    1.73
   2  -8  -5   12.31    2.24
  -2   8   5   12.60    1.69
   0  -8   5    0.49    1.21
   0  -8  -5    1.84    1.48
   0   8   5   -0.51    1.06
  -2  -8  -5   15.69    2.19
   2  -8   5   13.51    1.93
  14   0  -6   44.79    3.19
 -14   0   6   48.55    2.91
  12   0  -6    3.02    1.04
 -12   0   6    1.33    0.98
 -10   0   6   46.37    2.25
   8   0  -6   17.83    1.30
  -8   0   6   18.61    0.97
   8   0  -6   15.96    0.87
  -6   0   6   42.13    1.90
   6   0  -6   49.54    1.85
  -6   0   6   48.98    1.68
   6   0  -6   51.29    1.81
   6   0  -6   46.65    1.61
  -4   0   6  111.31    3.07
   4   0  -6  115.37    3.11
  -4   0   6  117.18    3.12
   4   0  -6  118.73    3.10
   2   0  -6  184.09    4.54
  -2   0   6  188.07    4.59
   2   0  -6  185.67    4.55
  -2   0   6  189.80    4.55
   0   0  -6   79.59    2.26
   0   0   6   76.01    2.36
   0   0   6   79.08    2.34
   0   0  -6   76.63    2.29
   0   0   6   80.85    2.31
   0   0  -6   80.97    2.47
   2   0   6   36.33    1.39
   2   0   6   37.03    1.65
  -2   0  -6   33.60    1.50
  -2   0  -6   34.29    1.54
  -2   0  -6   33.97    1.30
  -4   0  -6   28.82    1.53
  -4   0  -6   24.81    1.07
   4   0   6   28.69    1.66
   4   0   6   28.72    1.19
   6   0   6   59.36    2.81
  -6   0  -6   56.65    2.51
   8   0   6    5.34    1.37
  -8   0  -6    5.13    0.99
 -10   0  -6   51.17    2.83
  10   0   6   46.67    3.29
  15  -1  -6    8.37    1.98
 -15  -1   6    8.24    1.58
 -15   1   6    9.90    1.81
  15   1  -6    8.81    1.81
  13  -1  -6   28.44    2.50
 -13  -1   6   30.07    2.35
 -13   1   6   32.37    2.29
  13   1  -6   31.79    2.51
 -11  -1   6   87.13    3.43
  11  -1  -6   85.34    3.68
  11   1  -6   84.72    3.56
 -11   1   6   93.59    3.44
  -9  -1   6   82.11    2.98
   9  -1  -6   75.65    2.35
  -9  -1   6   80.58    2.37
   9  -1  -6   79.73    3.16
  -9   1   6   77.63    2.36
  -9   1   6   79.17    2.83
   9   1  -6   81.43    3.07
   7  -1  -6  262.46    6.63
  -7  -1   6  256.75    6.05
   7  -1  -6  258.15    6.04
  -7  -1   6  245.89    6.25
   7   1  -6  266.26    6.40
   7   1  -6  263.52    6.41
  -7   1   6  257.81    6.04
   7   1  -6  241.84    5.91
   5  -1  -6  162.18    4.00
  -5  -1   6  161.41    4.07
   5  -1  -6  154.94    4.21
   5  -1  -6  158.16    4.02
   5   1  -6  152.74    3.95
  -5   1   6  159.69    4.47
  -5   1   6  161.76    4.07
   5   1  -6  161.36    4.20
  -5   1   6  162.66    4.02
  -3  -1   6  272.10    6.65
   3  -1  -6  294.23    6.49
  -3  -1   6  287.07    6.67
   3  -1  -6  288.15    6.62
   3   1  -6  277.84    6.57
  -3   1   6  283.70    6.64
  -3   1   6  297.46    6.69
  -3   1   6  283.88    6.48
   3   1  -6  292.83    6.70
   1  -1  -6  143.56    4.01
  -1  -1   6  135.58    3.71
   1  -1  -6  138.96    3.63
  -1  -1   6  149.77    3.73
   1  -1  -6  140.62    3.73
   1  -1  -6  142.70    3.59
  -1   1   6  146.09    3.71
   1   1  -6  141.00    3.75
  -1   1   6  140.18    3.55
   1   1  -6  136.56    3.59
   1  -1   6  257.92    6.03
  -1  -1  -6  255.60    6.31
  -1  -1  -6  246.35    5.95
  -1  -1  -6  261.02    6.12
   1   1   6  249.69    5.98
   1   1   6  247.01    6.06
  -1   1  -6  257.83    6.29
  -1   1  -6  249.09    5.91
   1   1   6  269.68    6.42
   3  -1   6  135.72    3.89
   3  -1   6  137.12    3.47
  -3  -1  -6  132.33    3.78
  -3  -1  -6  122.12    3.35
  -3   1  -6  120.88    3.32
   3   1   6  136.04    4.13
  -3   1  -6  134.99    3.93
  -3   1  -6  123.19    3.69
   3   1   6  132.60    3.43
   5  -1   6  186.93    5.43
   5  -1   6  184.53    4.51
  -5  -1  -6  172.01    4.43
   5   1   6  182.29    5.62
  -5   1  -6  187.43    5.29
   5   1   6  180.31    4.46
  -7  -1  -6   69.26    2.95
   7  -1   6   70.10    3.19
   7   1   6   71.43    3.37
  -7   1  -6   67.95    2.98
   9  -1   6   35.53    2.58
  -9  -1  -6   31.90    2.14
   9   1   6   37.93    2.73
  11  -1   6   72.87    3.99
 -11  -1  -6   70.25    3.55
  11   1   6   71.28    4.10
 -11   1  -6   69.06    3.55
 -14  -2   6    5.78    1.42
  14  -2  -6    6.46    1.49
 -14   2   6    4.33    1.76
  14   2  -6    6.42    1.83
  12  -2  -6   14.81    1.83
  12   2  -6   18.24    1.81
 -12   2   6   15.91    1.69
  10  -2  -6    2.75    1.01
 -10  -2   6    2.53    0.57
 -10  -2   6    3.72    0.88
 -10   2   6    3.64    0.94
 -10   2   6    3.05    0.66
  10   2  -6    4.41    0.94
  -8  -2   6   39.96    1.59
   8  -2  -6   39.93    2.10
   8   2  -6   39.72    1.90
  -8   2   6   40.53    1.79
  -8   2   6   41.70    1.62
  -6  -2   6   40.13    1.56
   6  -2  -6   39.85    1.91
  -6  -2   6   44.30    1.63
   6   2  -6   41.62    1.67
  -6   2   6   44.12    1.66
  -6   2   6   44.22    1.55
   6   2  -6   44.58    1.80
  -4  -2   6   49.24    1.79
   4  -2  -6   48.90    1.57
   4  -2  -6   51.13    2.05
  -4   2   6   50.19    1.97
  -4   2   6   50.63    1.81
   4   2  -6   49.67    1.86
  -2  -2   6   29.50    1.34
   2  -2  -6   31.80    1.50
   2   2  -6   27.93    1.33
  -2   2   6   29.49    1.34
  -2   2   6   27.88    1.40
   0  -2  -6   27.34    1.14
   0  -2  -6   25.92    1.46
   0  -2   6   28.52    1.28
   0  -2  -6   25.94    1.42
   0   2   6   27.21    1.26
   0   2  -6   29.70    1.38
   0   2   6   26.53    1.11
   2  -2   6    0.71    0.40
   2  -2   6    1.11    0.45
  -2   2  -6    0.58    0.32
   2   2   6    0.15    0.34
   2   2   6    0.34    0.39
  -2   2  -6    0.80    0.34
   4  -2   6   35.90    1.48
  -4  -2  -6   36.84    1.73
   4  -2   6   36.70    1.87
  -4   2  -6   40.26    1.91
   4   2   6   34.11    2.10
   4   2   6   35.50    1.47
   6  -2   6   10.13    0.84
   6  -2   6   10.42    1.31
  -6  -2  -6   13.31    1.21
   6   2   6    9.41    1.59
  -6   2  -6   11.47    1.17
   8  -2   6    4.95    1.23
  -8  -2  -6    3.01    0.96
  -8   2  -6    4.28    1.09
   8   2   6    3.10    1.17
  10  -2   6    2.84    1.35
 -10  -2  -6    4.61    1.34
 -10   2  -6    3.67    1.25
  10   2   6    5.88    1.59
  13  -3  -6   71.18    3.87
 -13  -3   6   74.63    3.77
 -13   3   6   71.93    3.26
  13   3  -6   77.05    3.82
 -11  -3   6    9.08    0.95
  11  -3  -6    8.49    1.60
 -11  -3   6    9.80    1.47
  11   3  -6    8.95    1.50
 -11   3   6    8.60    0.93
 -11   3   6    7.90    1.21
  -9  -3   6  139.54    3.92
   9  -3  -6  142.40    4.92
  -9   3   6  142.08    3.93
   9   3  -6  148.56    4.64
  -9   3   6  142.06    4.15
  -7  -3   6   33.77    1.71
   7  -3  -6   38.42    2.31
  -7  -3   6   38.41    1.64
  -7   3   6   38.82    1.47
  -7   3   6   41.43    1.69
   7   3  -6   37.14    1.83
  -7   3   6   38.29    1.59
   5  -3  -6  223.77    6.06
  -5  -3   6  216.50    5.46
  -5   3   6  208.06    5.44
   5   3  -6  215.11    5.55
  -3  -3   6   21.05    1.19
   3  -3  -6   20.35    1.38
   3   3  -6   19.80    1.19
  -3   3   6   22.08    1.21
   1  -3  -6  407.18    9.84
  -1  -3   6  410.34    9.38
  -1   3   6  407.94    9.39
   1   3  -6  403.84    9.41
  -1  -3  -6   69.27    2.85
   1  -3   6   72.29    2.38
   1   3   6   64.64    2.31
  -1   3  -6   68.55    2.50
  -3  -3  -6  255.07    6.30
   3  -3   6  248.91    6.53
   3  -3   6  256.59    6.29
  -3   3  -6  276.22    8.52
   3   3   6  246.61    6.22
   5  -3   6   16.27    1.10
   5  -3   6   18.88    1.52
  -5  -3  -6   20.86    1.36
   5   3   6   16.11    1.08
  -5   3  -6   20.61    1.56
   5   3   6   18.67    1.65
  -7  -3  -6  117.85    4.02
   7  -3   6  116.01    3.39
   7  -3   6  118.81    4.39
   7   3   6  117.14    4.81
  -7   3  -6  121.58    4.32
  -9  -3  -6   36.67    2.22
   9  -3   6   33.15    2.49
  -9   3  -6   35.59    2.43
   9   3   6   31.86    2.78
 -12  -4   6   23.79    2.33
  12  -4  -6   17.06    2.15
 -12   4   6   14.45    1.63
  12   4  -6   16.98    2.19
 -12   4   6   14.74    1.28
 -10  -4   6    9.07    1.15
  10  -4  -6    9.95    1.68
 -10  -4   6    9.24    1.45
 -10   4   6    8.87    1.04
  10   4  -6    8.83    1.33
 -10   4   6    7.65    1.32
  -8  -4   6    7.19    1.15
   8  -4  -6    6.05    1.30
  -8   4   6    6.27    0.91
   8   4  -6    4.15    1.04
   8   4  -6    5.45    0.88
   6  -4  -6    6.29    1.13
  -6  -4   6    7.76    0.90
  -6   4   6    8.24    0.97
  -4   4   6   14.30    1.83
   4   4  -6   14.57    1.08
   2  -4  -6   21.24    1.56
   2   4  -6   21.93    1.30
   0   4  -6   77.73    2.68
   2  -4   6    1.14    0.64
  -2  -4  -6    0.61    0.79
   2  -4   6    1.58    0.64
  -2   4  -6    2.03    0.89
   4  -4   6    7.25    0.93
   4  -4   6    6.94    1.13
  -4  -4  -6    7.04    1.39
  -4  -4  -6    6.76    0.94
  -4   4  -6    5.98    1.04
   6  -4   6    6.65    0.96
  -6  -4  -6    5.17    1.01
   6  -4   6    6.13    1.18
  -6   4  -6    6.67    1.18
   8  -4   6    7.41    1.52
   8  -4   6    7.64    1.02
  -8  -4  -6    4.54    1.06
  -8   4  -6    7.86    1.65
   8   4   6    6.68    1.64
  11  -5  -6   43.14    3.03
 -11  -5   6   37.43    2.01
 -11  -5   6   39.43    3.00
 -11   5   6   37.58    2.05
  11   5  -6   38.31    2.76
 -11   5   6   35.85    1.96
   9  -5  -6    5.40    1.46
  -9  -5   6    5.82    0.95
  -9   5   6    4.98    1.02
  -7  -5   6   96.97    3.58
   7  -5  -6   97.16    4.15
  -7  -5   6   94.38    3.28
   7   5  -6   98.39    3.34
  -7   5   6   94.69    3.26
  -5  -5   6   12.85    1.24
  -5  -5   6   13.74    1.25
   5  -5  -6   12.84    1.51
  -5   5   6   13.33    1.17
   5   5  -6   15.95    1.23
  -3  -5   6  143.47    4.38
  -3  -5   6  161.82    4.66
  -3  -5   6  152.24    4.40
   3  -5  -6  162.98    5.27
  -3   5   6  160.39    4.60
   3   5  -6  159.17    4.45
  -1  -5   6    6.22    0.93
   1  -5  -6    7.90    1.31
  -1  -5   6    7.80    1.06
   1   5  -6    5.60    1.10
   1   5  -6    6.39    0.94
  -1   5   6    9.41    1.04
   1  -5   6  136.62    4.15
  -1  -5  -6  132.73    4.88
   1  -5   6  144.07    4.30
   1   5   6  135.91    4.13
  -1   5  -6  137.49    4.11
   3  -5   6   16.67    1.35
   3  -5   6   17.93    1.51
  -3  -5  -6   15.93    1.85
  -3   5  -6   16.17    1.35
   3   5   6   14.85    1.30
   5  -5   6  107.11    3.56
  -5  -5  -6  105.76    4.63
   5  -5   6  102.09    3.98
   5   5   6  107.76    3.49
  -5   5  -6  108.75    3.87
  -7  -5  -6   31.80    2.65
   7  -5   6   32.73    1.89
  -7  -5  -6   31.76    1.92
   7  -5   6   31.80    2.47
   7   5   6   32.75    1.78
  -7   5  -6   34.17    2.81
 -10  -6   6    5.48    1.69
  10  -6  -6    5.64    1.64
 -10  -6   6    2.66    1.13
 -10  -6   6    3.44    1.43
 -10   6   6    3.15    0.92
   8  -6  -6    4.28    1.71
  -8  -6   6    3.72    1.02
  -8  -6   6    6.49    1.29
  -8   6   6    3.13    0.99
  -6  -6   6   15.55    1.86
  -6  -6   6   14.49    1.52
   6  -6  -6   12.82    1.82
   6   6  -6   14.43    1.32
  -6   6   6   14.24    1.45
  -4  -6   6    7.34    1.06
   4  -6  -6    8.80    1.63
  -4  -6   6    8.39    1.14
  -4   6   6    9.22    1.29
   4   6  -6    8.03    1.05
  -2  -6   6   30.81    1.90
   2  -6  -6   36.69    2.45
  -2  -6   6   33.85    1.88
  -2   6   6   33.93    1.90
   2   6  -6   32.46    1.72
   0  -6   6   11.87    1.28
   0  -6  -6   13.84    1.77
   0  -6   6   12.36    1.34
   0   6   6   13.83    1.37
   0   6  -6   14.26    1.24
   2  -6   6    6.37    1.10
   2  -6   6    6.56    1.17
  -2  -6  -6    5.70    1.45
   2   6   6    8.54    1.37
  -2   6  -6    8.03    1.16
  -4  -6  -6   12.93    1.92
   4  -6   6   12.23    1.42
   4  -6   6   12.39    1.51
   4   6   6   14.55    1.46
  -4   6  -6   14.34    1.51
   6  -6   6   15.59    1.73
   6  -6   6   15.52    1.94
  -6  -6  -6   12.33    1.99
  -6   6  -6   16.84    1.83
   6   6   6   17.83    1.56
  -9  -7   6   20.27    2.31
   9  -7  -6   18.64    2.71
  -7  -7   6    3.43    1.34
  -7  -7   6   -1.29    0.95
   7  -7  -6    1.27    1.30
   7   7  -6    0.97    0.88
  -7   7   6    1.61    0.98
  -5  -7   6   44.53    2.40
  -5  -7   6   42.87    2.43
   5  -7  -6   40.78    2.94
   5   7  -6   39.10    2.00
  -5   7   6   43.99    2.36
  -3  -7   6    2.39    1.20
   3  -7  -6    1.80    1.26
  -3  -7   6    0.77    0.86
  -3   7   6    0.55    0.99
   3   7  -6    1.26    0.80
   1  -7  -6   50.97    3.25
  -1  -7   6   53.17    2.69
  -1  -7   6   52.37    2.67
   1   7  -6   50.33    2.28
  -1   7   6   57.66    3.06
   1  -7   6   11.73    1.56
   1  -7   6    9.49    1.46
  -1  -7  -6   12.74    2.20
   1   7   6   10.24    1.54
  -1   7  -6   13.41    1.30
   3  -7   6   19.39    1.86
  -3  -7  -6   16.58    2.31
   3  -7   6   18.35    1.97
  -3   7  -6   22.46    1.82
   3   7   6   23.22    1.81
   4  -8  -6   20.63    2.37
  -4  -8   6   18.11    1.89
  -4  -8   6   19.73    2.00
  -4   8   6   19.08    1.80
   4   8  -6   16.87    1.67
  -2  -8   6   42.15    2.65
   2  -8  -6   43.62    3.18
  -2  -8   6   47.28    2.67
  -2   8   6   46.38    2.57
   2   8  -6   44.43    2.25
   0  -8   6    6.40    1.49
   0  -8  -6    4.56    1.60
   0  -8   6    4.57    1.18
   0   8   6    8.28    1.43
   0   8  -6    5.66    1.19
 -14   0   7    0.55    1.36
  14   0  -7    2.66    1.17
  12   0  -7    1.17    0.84
 -12   0   7    0.12    0.85
 -10   0   7    1.49    0.50
  10   0  -7    2.15    0.78
 -10   0   7    0.64    0.77
  -6   0   7    0.56    0.39
   6   0  -7    0.85    0.43
  -6   0   7    0.55    0.39
   6   0  -7    0.78    0.39
   4   0  -7   -0.09    0.30
  -4   0   7    0.11    0.32
  -4   0   7   -0.04    0.32
  -2   0   7    0.26    0.35
   2   0  -7    1.29    0.45
  -2   0   7   -0.08    0.32
   0   0   7    0.24    0.28
   0   0  -7    0.35    0.40
   2   0   7   -0.15    0.27
  -2   0  -7    0.12    0.35
  -2   0  -7   -0.09    0.33
   2   0   7    0.40    0.43
   4   0   7    0.74    0.44
   4   0   7    0.50    0.53
  -4   0  -7    0.75    0.57
   6   0   7    0.33    0.60
  -6   0  -7    1.67    0.64
  -8   0  -7    0.40    0.76
   8   0   7   -0.36    0.83
  10   0   7   -0.87    1.26
 -10   0  -7    1.00    0.95
  15  -1  -7    4.96    1.57
 -15  -1   7    3.74    1.51
 -15   1   7    5.66    1.50
  15   1  -7    7.49    1.75
 -13  -1   7    8.11    1.59
  13  -1  -7    8.38    1.63
  13   1  -7    8.23    1.67
 -13   1   7    7.23    1.52
  11  -1  -7   32.06    2.10
 -11  -1   7   32.71    2.14
 -11  -1   7   31.64    1.40
  11   1  -7   35.89    2.13
 -11   1   7   35.47    2.13
 -11   1   7   33.12    1.44
  -9  -1   7   73.69    2.36
   9  -1  -7   75.56    2.99
  -9   1   7   77.44    2.43
   9   1  -7   72.87    2.82
  -9   1   7   78.77    2.81
  -7  -1   7  108.37    3.41
   7  -1  -7  114.18    3.60
   7  -1  -7  119.71    3.34
  -7  -1   7  114.23    3.26
   7   1  -7  114.19    3.35
  -7   1   7  119.99    3.28
   7   1  -7  119.63    3.49
   5  -1  -7   17.87    0.98
   5  -1  -7   16.16    1.07
  -5  -1   7   16.42    1.01
   5   1  -7   16.96    1.06
  -5   1   7   15.64    0.99
  -5   1   7   17.52    1.03
  -5   1   7   15.60    0.92
   3  -1  -7  127.13    3.38
   3  -1  -7  123.32    3.23
  -3  -1   7  123.29    3.40
  -3   1   7  122.31    3.39
   3   1  -7  124.81    3.42
  -3   1   7  115.51    3.28
  -3   1   7  118.76    3.21
   1  -1  -7   59.80    1.98
   1  -1  -7   59.70    2.04
  -1  -1   7   60.13    2.03
   1  -1  -7   61.31    2.08
  -1   1   7   58.31    2.02
   1   1  -7   59.30    2.12
  -1   1   7   57.52    1.93
  -1  -1  -7   88.55    2.79
  -1  -1  -7   85.07    2.86
   1  -1   7   92.38    2.72
  -1   1  -7   90.40    2.95
   1   1   7   92.39    2.71
  -3  -1  -7   16.32    1.19
   3  -1   7   15.96    0.99
   3  -1   7   16.71    1.24
   3   1   7   18.76    1.37
  -3   1  -7   14.40    1.41
   3   1   7   17.52    1.00
   5  -1   7   10.57    1.27
   5  -1   7   12.19    0.91
  -5  -1  -7   15.21    1.28
  -5   1  -7   12.50    1.29
   5   1   7   13.16    0.93
   5   1   7   12.58    1.37
   7  -1   7    2.52    1.00
  -7  -1  -7    3.87    1.01
  -7   1  -7    4.59    1.08
   7   1   7    3.27    1.19
  -9  -1  -7    0.36    0.81
   9  -1   7    0.69    1.11
  -9   1  -7    0.95    0.98
  14  -2  -7    7.34    1.63
 -14  -2   7    5.48    1.49
  14   2  -7    5.76    1.61
 -12  -2   7    1.09    0.95
  12  -2  -7    2.62    1.08
  12   2  -7    4.85    1.03
 -12   2   7    1.83    0.65
 -12   2   7    4.07    1.07
 -10  -2   7    1.11    0.48
  10  -2  -7    1.54    0.86
 -10   2   7    0.96    0.67
 -10   2   7    1.22    0.51
  10   2  -7    0.87    0.64
  -8  -2   7   30.02    1.41
   8  -2  -7   30.61    1.84
  -8  -2   7   24.44    1.43
  -8   2   7   31.12    1.57
   8   2  -7   32.68    1.72
   8   2  -7   31.13    1.64
  -8   2   7   31.25    1.44
   6  -2  -7   45.91    2.06
  -6  -2   7   47.14    1.83
   6  -2  -7   45.60    1.66
   6   2  -7   44.22    1.87
  -6   2   7   45.73    1.64
  -6   2   7   45.81    1.79
  -4  -2   7   32.06    1.43
   4  -2  -7   29.36    1.19
   4  -2  -7   30.38    1.59
   4   2  -7   30.57    1.47
  -4   2   7   28.46    1.28
  -4   2   7   30.43    1.42
  -4   2   7   33.48    1.58
  -2  -2   7   20.68    1.13
   2  -2  -7   19.00    0.91
   2  -2  -7   20.20    1.29
  -2   2   7   19.24    1.13
  -2   2   7   19.86    0.90
   2   2  -7   19.83    1.15
  -2   2   7   19.47    1.20
   0  -2  -7   17.06    1.24
   0  -2  -7   17.51    1.00
   0  -2   7   16.98    1.07
   0   2  -7   16.46    1.15
   0   2   7   18.03    1.09
   0   2   7   16.59    0.93
   2  -2   7    8.06    0.82
   2  -2   7    9.00    0.84
  -2  -2  -7    9.61    0.85
  -2   2  -7    9.41    1.00
  -2   2  -7    7.92    0.88
   2   2   7    8.79    0.81
   4  -2   7    2.18    0.60
  -4  -2  -7    2.82    0.71
   4  -2   7    2.86    0.76
   4   2   7    2.35    0.57
  -4   2  -7    2.54    0.69
   4   2   7    0.82    0.60
   6  -2   7   16.56    1.03
   6  -2   7   16.98    1.50
  -6  -2  -7   17.14    1.38
   6   2   7   15.27    1.69
  -6   2  -7   15.55    1.47
   6   2   7   16.62    1.02
  -8  -2  -7    8.86    1.38
   8  -2   7    6.01    1.22
   8   2   7    9.03    1.75
 -10  -2  -7   11.03    1.80
  10  -2   7   12.21    1.89
 -10   2  -7   12.35    1.73
  10   2   7   10.69    2.01
  13  -3  -7   21.82    2.29
 -13  -3   7   17.36    2.25
  13   3  -7   18.27    2.21
 -13   3   7   19.62    2.08
 -11  -3   7    1.67    0.67
  11  -3  -7    3.04    1.09
 -11  -3   7    2.50    1.09
  11   3  -7    1.57    0.97
 -11   3   7    2.69    0.75
 -11   3   7    2.88    0.94
   9  -3  -7   26.36    1.92
  -9  -3   7   26.23    1.43
   9   3  -7   27.50    1.70
   9   3  -7   25.55    1.68
  -9   3   7   24.64    1.44
  -9   3   7   23.87    1.49
  -7  -3   7   16.96    1.15
  -7  -3   7   13.33    1.02
  -7   3   7   16.81    1.08
  -7   3   7   18.90    1.20
  -7   3   7   16.27    0.98
   7   3  -7   17.48    1.24
   5  -3  -7  143.57    4.50
  -5  -3   7  149.00    4.09
  -5   3   7  146.29    4.09
   5   3  -7  141.61    4.12
   3  -3  -7   14.59    1.25
  -3  -3   7   14.24    1.04
   3   3  -7   13.67    1.04
  -3   3   7   13.49    1.02
   1  -3  -7  118.24    3.91
  -1  -3   7  122.96    3.54
  -1   3   7  119.46    3.51
   1   3  -7  116.81    3.56
   1  -3   7   25.16    1.33
  -1  -3  -7   27.90    1.75
  -1  -3  -7   23.01    1.17
  -1   3  -7   23.12    1.46
   1   3   7   23.06    1.30
   1   3   7   20.52    1.10
  -3  -3  -7   30.87    2.12
   3  -3   7   29.75    1.69
  -3  -3  -7   32.53    1.56
   3  -3   7   32.60    1.57
   3   3   7   33.25    1.58
  -3   3  -7   33.02    1.85
   5  -3   7    1.60    0.79
  -5  -3  -7    1.31    0.60
   5  -3   7    1.60    0.57
   5   3   7    0.20    0.74
  -5   3  -7    0.99    0.68
   5   3   7    0.51    0.61
   7  -3   7   28.64    2.14
  -7  -3  -7   29.92    1.90
   7  -3   7   26.64    1.47
   7   3   7   25.87    2.37
  -7   3  -7   28.96    2.11
  -9  -3  -7    5.20    1.13
   9  -3   7    4.20    1.87
   9   3   7    6.59    1.79
  -9   3  -7    7.92    1.58
  12  -4  -7   24.16    2.49
 -12  -4   7   24.63    1.63
 -12  -4   7   24.34    2.23
 -12   4   7   22.58    1.48
  12   4  -7   22.72    2.38
 -12   4   7   24.31    1.79
  10  -4  -7   17.99    1.89
 -10  -4   7   16.45    1.36
  10   4  -7   15.34    1.65
 -10   4   7   16.84    1.31
 -10   4   7   14.36    1.37
  -8  -4   7   28.50    1.66
   8  -4  -7   32.94    2.25
  -8   4   7   34.01    1.70
   8   4  -7   31.05    1.81
  -6  -4   7   26.07    1.50
   6  -4  -7   26.07    1.91
  -6   4   7   23.01    1.46
   6   4  -7   24.24    1.51
   4  -4  -7    8.56    1.23
  -4  -4   7    8.64    1.12
   4   4  -7    9.21    1.38
  -4   4   7    8.52    1.01
   2  -4  -7   16.17    1.62
  -2  -4   7   12.99    1.19
  -2   4   7   15.59    1.21
   2   4  -7   16.68    1.18
   0  -4  -7   65.79    2.96
   0  -4   7   64.42    2.48
   0   4   7   64.35    2.48
   0   4  -7   67.05    2.71
   2  -4   7    8.09    1.03
   2  -4   7    7.92    0.96
  -2  -4  -7    6.89    1.38
  -2   4  -7    7.90    1.20
   2   4   7    8.46    1.15
   4  -4   7   18.42    1.33
   4  -4   7   20.91    1.59
  -4  -4  -7   20.64    2.03
  -4  -4  -7   15.94    1.25
  -4   4  -7   16.78    1.53
   4   4   7   22.22    1.39
  -6  -4  -7    6.90    1.13
   6  -4   7    6.39    1.31
   6  -4   7    5.78    0.93
   6   4   7    7.38    0.98
  -6   4  -7    7.21    1.24
  -8  -4  -7   23.90    1.91
   8  -4   7   29.39    1.71
   8  -4   7   29.40    2.52
  -8   4  -7   29.74    2.10
 -11  -5   7   32.45    3.06
 -11  -5   7   27.83    1.91
  11  -5  -7   33.43    2.74
 -11   5   7   28.51    1.81
  -9  -5   7    6.86    1.40
  -9  -5   7    8.11    1.15
   9  -5  -7    7.24    1.59
  -9   5   7    7.31    1.07
   9   5  -7    6.05    1.15
   7  -5  -7    3.20    1.19
  -7  -5   7    4.81    0.91
  -7  -5   7    3.21    0.94
  -7   5   7    2.63    0.78
   7   5  -7    2.75    0.75
   5  -5  -7   74.45    3.43
  -5  -5   7   72.81    2.85
  -5   5   7   78.83    2.91
   5   5  -7   73.36    2.79
  -3  -5   7   22.35    1.55
   3  -5  -7   22.81    1.90
  -3   5   7   21.25    1.50
   3   5  -7   21.51    1.46
  -1  -5   7   30.72    1.71
   1  -5  -7   28.65    2.12
   1   5  -7   27.23    1.62
  -1   5   7   31.46    1.76
  -1  -5  -7   13.72    1.73
   1  -5   7   13.46    1.34
   1  -5   7   13.05    1.15
   1   5   7   15.97    1.41
  -1   5  -7   15.67    1.33
  -3  -5  -7   42.10    2.77
   3  -5   7   37.27    2.09
   3  -5   7   42.63    2.13
  -3   5  -7   42.22    2.23
   3   5   7   43.77    2.03
   5  -5   7    6.05    1.11
   5  -5   7    3.92    1.16
  -5   5  -7    5.19    1.20
   5   5   7    4.17    1.04
  -7  -5  -7   43.59    3.40
   7  -5   7   42.84    2.26
   7  -5   7   42.87    2.84
  -7  -5  -7   38.35    2.20
   7   5   7   41.22    2.09
  -7   5  -7   45.18    2.62
 -10  -6   7    7.00    1.71
  10  -6  -7    9.92    1.79
 -10  -6   7    7.16    1.73
 -10  -6   7    6.06    1.32
 -10   6   7    8.08    1.38
  -8  -6   7    2.37    1.05
   8  -6  -7    4.52    1.17
  -8  -6   7    2.69    1.13
   8   6  -7    2.47    0.95
  -8   6   7    3.81    0.99
  -6  -6   7   32.96    2.08
   6  -6  -7   30.55    2.42
  -6  -6   7   34.51    1.98
  -6   6   7   35.28    2.05
   6   6  -7   34.56    1.90
  -4  -6   7    2.60    0.86
   4  -6  -7    1.71    0.94
  -4  -6   7    5.16    1.01
  -4   6   7    2.70    0.84
   4   6  -7    1.68    0.70
   2  -6  -7   52.57    3.00
  -2  -6   7   53.50    2.55
  -2   6   7   52.53    2.47
   2   6  -7   55.12    2.32
   0  -6   7   15.28    1.54
   0  -6  -7   16.49    1.88
   0  -6   7   14.78    1.42
   0   6  -7   16.10    1.35
   0   6   7   18.14    1.58
   2  -6   7   54.73    3.08
  -2  -6  -7   50.27    3.17
   2  -6   7   58.00    2.62
  -2   6  -7   57.71    2.61
   2   6   7   56.46    2.59
   4  -6   7    2.09    1.07
   4  -6   7    1.11    1.06
  -4  -6  -7    0.73    1.15
   4   6   7    3.04    1.02
  -4   6  -7    1.42    0.93
   6  -6   7   54.56    2.84
  -6  -6  -7   57.87    3.60
   6  -6   7   55.55    3.15
  -6   6  -7   59.72    3.01
   6   6   7   62.58    2.78
   7  -7  -7   55.47    3.49
  -7  -7   7   57.53    2.90
  -7   7   7   52.67    2.70
   5  -7  -7    4.97    1.70
  -5  -7   7    4.51    1.28
  -5  -7   7    3.52    1.00
   5   7  -7    3.04    0.92
  -5   7   7    4.32    1.09
  -3  -7   7   39.88    2.45
  -3  -7   7   41.42    2.32
   3  -7  -7   42.51    2.89
   3   7  -7   45.95    2.14
  -3   7   7   41.08    2.35
   1  -7  -7    5.45    1.32
  -1  -7   7    4.92    1.20
  -1  -7   7    7.35    1.37
   1   7  -7    7.05    1.16
  -1   7   7    5.15    1.25
  -1  -7  -7   31.86    2.72
   1  -7   7   30.66    2.03
   1  -7   7   33.14    2.25
   1   7   7   32.65    2.12
  -1   7  -7   31.67    1.99
  -3  -7  -7   12.15    2.08
   3  -7   7    9.95    1.52
   3  -7   7    9.10    1.72
  -3   7  -7    9.09    1.39
   3   7   7   11.90    1.71
  14   0  -8   56.50    3.18
 -14   0   8   48.01    2.96
 -12   0   8    1.53    1.04
  12   0  -8    1.88    0.86
 -12   0   8    0.90    0.51
 -10   0   8  149.34    4.66
 -10   0   8  155.56    4.17
  10   0  -8  155.00    4.87
   8   0  -8   34.57    1.76
   8   0  -8   37.28    1.71
  -8   0   8   36.82    1.59
   6   0  -8  286.12    6.86
  -6   0   8  273.56    6.62
  -6   0   8  289.02    6.83
   6   0  -8  280.39    6.68
   4   0  -8   13.75    0.93
  -4   0   8   14.37    0.99
   2   0  -8  197.79    5.09
  -2   0   8  204.57    5.14
   0   0  -8   72.73    2.47
   0   0  -8   64.74    2.17
   0   0   8   73.40    2.38
  -2   0  -8  157.89    4.49
   2   0   8  161.67    4.52
  -2   0  -8  142.41    4.34
   2   0   8  153.92    4.16
   4   0   8   35.82    2.04
  -4   0  -8   35.25    1.92
   4   0   8   34.84    1.52
   6   0   8   64.92    3.13
  -6   0  -8   65.28    2.94
   6   0   8   65.20    2.18
   8   0   8   68.08    3.57
  -8   0  -8   72.54    3.36
 -15  -1   8   22.27    2.36
  15  -1  -8   26.29    2.49
  15   1  -8   25.80    2.53
 -15   1   8   27.54    2.49
  13  -1  -8   14.17    2.08
 -13  -1   8   14.45    1.77
  13   1  -8   10.72    1.73
 -13   1   8    8.68    1.47
 -11  -1   8   45.88    2.48
 -11  -1   8   46.79    1.84
  11  -1  -8   44.27    2.53
  11   1  -8   44.13    2.37
 -11   1   8   44.54    1.83
 -11   1   8   49.14    2.38
   9  -1  -8   68.71    2.83
  -9  -1   8   67.48    2.30
   9   1  -8   64.44    2.55
  -9   1   8   64.19    2.27
   9   1  -8   61.17    2.52
   7  -1  -8   65.07    2.24
  -7  -1   8   63.17    2.21
   7  -1  -8   62.01    2.40
  -7   1   8   61.41    2.17
   7   1  -8   60.71    2.31
   5  -1  -8   61.46    2.15
  -5  -1   8   64.15    2.21
   5  -1  -8   63.05    2.08
  -5   1   8   61.93    2.18
   5   1  -8   63.51    2.26
  -5   1   8   57.96    2.07
   3  -1  -8  110.33    3.15
   3  -1  -8  111.65    3.09
  -3  -1   8  116.60    3.30
  -3   1   8  107.30    3.08
   3   1  -8  111.43    3.29
  -3   1   8  114.42    3.28
  -3   1   8  105.01    3.06
   1  -1  -8   37.42    1.53
   1  -1  -8   36.25    1.58
   1  -1  -8   34.85    1.55
  -1  -1   8   38.34    1.60
   1   1  -8   36.05    1.65
  -1   1   8   36.04    1.57
   1  -1   8  229.01    5.78
  -1  -1  -8  231.69    5.91
   1   1   8  233.10    5.78
  -1   1  -8  229.39    6.07
   3  -1   8  112.67    3.28
   3  -1   8  110.28    3.60
   3   1   8  113.46    3.90
   3   1   8  114.57    3.28
  -3   1  -8  108.22    3.70
   5  -1   8   45.52    1.81
  -5  -1  -8   44.71    2.28
  -5   1  -8   46.55    2.39
   5   1   8   48.01    2.59
   5   1   8   48.35    1.85
   7  -1   8   31.91    2.23
  -7  -1  -8   29.43    2.02
   7   1   8   30.86    2.38
  -7   1  -8   29.58    2.11
  -9  -1  -8   58.54    3.14
   9   1   8   60.54    3.63
  -9   1  -8   61.66    3.19
 -14  -2   8    2.01    1.31
  14  -2  -8    2.85    1.30
  14   2  -8    2.83    1.20
 -12  -2   8   64.53    2.27
  12  -2  -8   59.87    3.19
 -12  -2   8   59.69    3.05
 -12   2   8   62.56    2.24
  12   2  -8   62.94    3.04
 -12   2   8   61.93    2.88
 -10  -2   8    7.79    0.91
  10  -2  -8    9.90    1.57
 -10   2   8    8.89    0.96
 -10   2   8    8.16    1.13
  10   2  -8    7.70    1.10
  10   2  -8    6.99    1.08
   8  -2  -8   87.26    3.26
  -8  -2   8   85.49    2.79
  -8  -2   8   77.92    2.63
   8   2  -8   88.21    3.07
  -8   2   8   88.14    2.81
   8   2  -8   86.20    2.86
  -6  -2   8   10.32    0.92
   6  -2  -8   13.40    1.14
   6  -2  -8    9.77    0.83
  -6   2   8   10.23    0.90
   6   2  -8   11.83    1.02
  -4  -2   8   67.32    2.38
   4  -2  -8   66.11    2.05
   4  -2  -8   64.54    2.48
  -4   2   8   62.34    2.02
  -4   2   8   69.48    2.37
   4   2  -8   64.15    2.37
   2  -2  -8   64.48    2.03
   2  -2  -8   64.21    2.46
  -2  -2   8   64.56    2.32
  -2   2   8   62.10    2.02
  -2   2   8   65.85    2.30
   2   2  -8   65.92    2.38
   0  -2  -8  175.75    5.04
   0  -2   8  174.28    4.74
   0  -2  -8  172.56    4.54
   0   2  -8  179.06    4.95
   0   2   8  175.80    4.72
   2  -2   8  122.38    3.56
  -2  -2  -8  126.58    3.65
   2  -2   8  114.31    3.51
  -2  -2  -8  121.39    4.11
  -2   2  -8  105.53    3.31
  -2   2  -8  126.11    3.94
   2   2   8  121.95    3.52
  -4  -2  -8   39.46    2.05
   4  -2   8   45.44    1.81
   4  -2   8   43.68    2.12
   4   2   8   41.74    1.78
  -4   2  -8   39.52    2.14
   4   2   8   43.42    2.47
   6  -2   8   46.60    1.86
  -6  -2  -8   45.91    2.38
   6  -2   8   46.31    2.56
  -6   2  -8   43.30    2.49
   6   2   8   46.90    2.89
   6   2   8   46.15    1.85
   8  -2   8   32.99    2.58
   8   2   8   32.36    2.83
  -8   2  -8   33.93    2.40
 -13  -3   8   33.17    1.96
  13  -3  -8   37.14    2.81
 -13  -3   8   40.34    2.71
 -13   3   8   38.20    2.45
 -13   3   8   36.04    1.74
  13   3  -8   29.88    2.48
  11  -3  -8    7.73    1.68
 -11  -3   8    5.35    0.81
 -11   3   8    4.12    0.85
  11   3  -8    4.45    1.14
 -11   3   8    4.65    1.01
  -9  -3   8  119.90    3.71
   9  -3  -8  117.57    4.36
  -9   3   8  123.23    3.74
   9   3  -8  123.20    4.00
   9   3  -8  117.15    3.89
  -9   3   8  123.04    3.72
  -7  -3   8    9.91    1.09
   7  -3  -8   11.09    1.54
  -7   3   8    9.63    0.92
  -7   3   8   10.12    0.99
   7   3  -8    8.89    1.05
   5  -3  -8  268.34    7.29
  -5   3   8  273.76    7.24
   5   3  -8  275.62    7.34
   3  -3  -8    1.21    0.63
   3   3  -8    1.55    0.61
   1  -3  -8  259.67    7.03
  -1  -3  -8    0.73    0.45
   1  -3   8   -0.14    0.51
  -1   3  -8    0.61    0.52
   3  -3   8  104.29    3.48
  -3  -3  -8  108.00    3.42
   3  -3   8  107.13    3.37
  -3  -3  -8  104.99    4.17
  -3   3  -8  106.89    3.76
   3   3   8  112.67    3.72
   5  -3   8    8.13    1.01
   5  -3   8    9.79    1.68
  -5  -3  -8    8.54    1.22
  -5   3  -8   10.32    1.43
   5   3   8    9.31    1.16
  -7  -3  -8   67.08    3.00
   7  -3   8   69.98    3.33
   7  -3   8   68.93    2.50
  -7   3  -8   68.90    3.28
  12  -4  -8   17.20    2.30
 -12  -4   8   23.23    2.26
 -12  -4   8   20.99    1.58
  12   4  -8   25.49    2.08
 -12   4   8   20.09    1.52
 -12   4   8   18.69    1.73
  10  -4  -8   44.09    2.69
 -10  -4   8   40.73    1.97
  10   4  -8   43.01    2.28
 -10   4   8   38.48    1.92
 -10   4   8   39.75    1.93
  10   4  -8   38.11    2.31
  -8  -4   8    9.26    1.16
   8  -4  -8   11.22    1.59
   8   4  -8   11.24    1.24
  -8   4   8    9.22    1.15
   6  -4  -8   50.92    2.72
  -6  -4   8   52.53    2.27
  -6   4   8   54.51    2.27
   6   4  -8   52.36    2.31
   4  -4  -8   18.17    1.63
  -4  -4   8   19.74    1.42
   4   4  -8   18.43    1.38
  -4   4   8   17.46    1.38
   2  -4  -8   72.22    3.11
  -2  -4   8   71.82    2.73
  -2   4   8   70.89    2.73
   2   4  -8   74.48    2.75
   0  -4  -8    6.70    1.35
   0  -4   8    5.91    0.98
   0   4   8    5.34    0.98
   0   4  -8    5.47    0.91
   2  -4   8   31.58    1.71
  -2  -4  -8   32.99    2.33
  -2   4  -8   30.51    1.93
   2   4   8   29.70    1.70
  -4  -4  -8   30.37    2.47
   4  -4   8   32.34    1.72
  -4  -4  -8   27.94    1.95
   4  -4   8   27.87    1.92
  -4   4  -8   31.30    2.04
   4   4   8   30.85    1.71
  -6  -4  -8   16.50    2.32
   6  -4   8   20.06    1.88
   6  -4   8   19.20    1.43
  -6  -4  -8   16.63    1.50
  -6   4  -8   18.39    2.21
   6   4   8   16.93    1.33
  11  -5  -8   34.22    2.72
 -11  -5   8   35.91    2.62
 -11  -5   8   34.17    2.05
 -11   5   8   36.14    2.01
   9  -5  -8    5.40    1.49
  -9  -5   8    7.41    1.09
  -9  -5   8    7.45    1.43
   9   5  -8    5.62    1.10
  -9   5   8    6.03    1.11
  -7  -5   8  111.31    3.83
   7  -5  -8  108.29    4.49
  -7   5   8  114.42    3.77
   7   5  -8  107.05    3.72
   5  -5  -8    9.65    1.65
  -5  -5   8    8.84    1.23
   5   5  -8   10.55    1.20
  -5   5   8   10.06    1.18
   3  -5  -8   92.48    3.93
  -3  -5   8   97.25    3.49
   3   5  -8   99.41    3.40
  -3   5   8   99.09    3.44
   1  -5  -8    2.64    1.09
  -1  -5   8    0.63    0.66
   1   5  -8    2.65    0.86
  -1   5   8    1.08    0.76
   1  -5   8   95.57    3.50
  -1  -5  -8   92.71    4.15
  -1   5  -8   99.92    3.51
   1   5   8   96.11    3.40
   3  -5   8    0.97    0.72
  -3  -5  -8    0.34    0.92
   3  -5   8    0.74    0.74
  -3   5  -8   -0.02    0.76
   3   5   8    0.61    0.86
   5  -5   8   58.79    2.93
  -5  -5  -8   52.44    3.43
   5  -5   8   60.71    2.71
   5   5   8   56.55    2.47
  10  -6  -8   30.27    2.82
 -10  -6   8   34.20    2.32
 -10   6   8   32.03    2.11
  -8  -6   8    0.32    1.04
   8  -6  -8    1.14    1.16
  -8  -6   8    1.47    0.94
   8   6  -8    2.69    0.94
  -8   6   8    1.64    1.20
   6  -6  -8   37.82    2.76
  -6  -6   8   34.07    2.20
   6   6  -8   33.75    1.96
  -6   6   8   40.12    2.19
  -4  -6   8   11.52    1.57
   4  -6  -8    9.02    1.65
  -4   6   8   11.92    1.38
   4   6  -8   11.04    1.27
  -2  -6   8   21.21    1.75
   2  -6  -8   18.32    2.06
  -2   6   8   18.13    1.58
   2   6  -8   17.37    1.47
   0  -6   8   11.19    1.61
   0  -6  -8   10.19    2.00
   0   6  -8   12.36    1.36
   0   6   8    9.50    1.37
   2  -6   8   29.92    2.11
  -2  -6  -8   27.98    2.62
  -2   6  -8   33.75    2.06
   2   6   8   36.62    2.06
  -4  -6  -8   17.11    2.71
   4  -6   8   19.61    2.86
   4  -6   8   20.20    1.83
   4   6   8   17.34    1.82
  -4   6  -8   20.30    2.44
  -7  -7   8    5.28    1.43
   7  -7  -8    5.49    1.53
  -7   7   8    4.42    1.33
   7   7  -8    5.02    1.21
   5  -7  -8   18.49    2.19
  -5  -7   8   22.03    1.96
  -5   7   8   24.36    1.95
   5   7  -8   18.31    1.74
  -3  -7   8   20.16    1.87
   3  -7  -8   16.26    2.06
   3   7  -8   18.93    1.72
  -3   7   8   19.28    1.83
   1  -7  -8   32.69    2.64
  -1  -7   8   35.42    2.28
  -1   7   8   34.22    2.27
   1   7  -8   34.34    2.12
   1  -7   8    8.57    1.57
  -1  -7  -8    7.89    1.83
  -1   7  -8    9.22    1.43
   1   7   8    9.15    1.51
 -14   0   9    0.17    1.21
  14   0  -9    1.18    1.04
  12   0  -9   -1.34    0.74
 -12   0   9   -0.05    0.52
 -12   0   9    0.42    0.98
 -10   0   9    1.02    0.54
  10   0  -9    2.19    0.71
  -6   0   9    1.48    0.51
   6   0  -9    2.01    0.52
   4   0  -9   -0.37    0.33
  -4   0   9   -0.25    0.32
   2   0  -9    0.72    0.38
  -2   0   9    1.04    0.47
   0   0  -9    0.15    0.42
   0   0   9   -0.49    0.36
   2   0   9    0.22    0.44
  -2   0  -9    0.86    0.48
   2   0   9    0.52    0.57
   4   0   9    0.05    0.49
   4   0   9    0.47    0.67
  -4   0  -9    0.10    0.46
  -6   0  -9    0.32    0.82
   6   0   9    0.93    0.57
   6   0   9    1.37    0.73
   8   0   9    0.99    1.23
  -8   0  -9   -0.23    0.98
 -15  -1   9    6.31    1.60
  15  -1  -9    9.05    1.67
 -15   1   9    9.11    1.74
  13  -1  -9   16.24    1.85
 -13  -1   9   15.63    1.17
 -13   1   9   16.73    1.84
 -13   1   9   13.44    1.19
  13   1  -9   15.16    1.73
  11  -1  -9   19.74    1.71
 -11  -1   9   18.41    1.26
  11   1  -9   19.46    1.70
 -11   1   9   17.58    1.60
 -11   1   9   17.27    1.28
   9  -1  -9    8.55    1.26
   9  -1  -9   10.96    1.07
  -9  -1   9    7.36    0.91
   9   1  -9   10.61    1.09
  -9   1   9    7.26    0.87
   9   1  -9    9.16    1.10
   7  -1  -9   90.09    2.85
  -7  -1   9   84.61    2.86
   7  -1  -9   85.53    2.95
   7   1  -9   89.79    3.03
  -7   1   9   89.46    2.89
  -5  -1   9  122.53    3.56
   5  -1  -9  111.42    3.34
   5  -1  -9  118.77    3.34
  -5   1   9  117.54    3.50
   5   1  -9  117.70    3.54
  -5   1   9  108.83    3.32
   3  -1  -9  102.51    3.07
   3  -1  -9  103.40    3.09
  -3  -1   9  109.11    3.32
   3   1  -9  109.80    3.33
  -3   1   9  107.81    3.29
  -1  -1   9   91.84    2.95
   1  -1  -9   92.10    2.88
   1  -1  -9   82.98    2.82
   1  -1  -9   90.01    2.90
  -1   1   9   93.06    2.95
   1   1  -9   91.71    3.05
  -1  -1  -9   86.66    3.09
   1  -1   9   88.37    2.89
  -1  -1  -9   88.24    2.99
  -1   1  -9   86.17    3.10
   1   1   9   83.33    2.82
   3  -1   9   57.66    2.51
  -3  -1  -9   61.73    2.52
   3  -1   9   60.39    2.24
   3   1   9   62.44    2.78
   3   1   9   59.16    2.22
  -3   1  -9   57.45    2.59
   5  -1   9   32.75    1.60
   5  -1   9   32.66    2.09
  -5  -1  -9   30.97    1.96
   5   1   9   34.43    1.60
  -5   1  -9   32.01    2.06
   5   1   9   32.78    2.24
   7  -1   9   11.42    1.83
   7  -1   9   12.29    1.05
  -7  -1  -9   11.91    1.80
   7   1   9   14.00    1.82
  -7   1  -9   10.67    1.62
 -14  -2   9   28.48    2.45
  14  -2  -9   30.27    2.57
 -14   2   9   22.50    1.49
  14   2  -9   29.56    2.38
  12  -2  -9   13.93    1.72
 -12  -2   9    8.85    1.53
 -12  -2   9   12.19    1.14
  12   2  -9   11.57    1.61
 -12   2   9    9.25    1.48
 -12   2   9   13.31    1.13
  10  -2  -9   50.28    2.65
 -10  -2   9   48.27    2.07
 -10   2   9   51.81    2.09
  10   2  -9   50.65    2.42
 -10   2   9   54.92    2.34
  10   2  -9   46.72    2.26
   8  -2  -9    6.16    1.08
  -8  -2   9    5.79    1.03
  -8   2   9    5.86    0.91
   8   2  -9    3.94    0.82
   6  -2  -9   51.32    1.88
   6  -2  -9   52.68    2.29
   6   2  -9   50.18    2.18
   4  -2  -9   15.98    0.98
  -4  -2   9   14.22    1.72
   4  -2  -9   13.34    1.16
   2  -2  -9   11.81    0.85
   2  -2  -9   10.66    1.03
  -2   2   9   11.47    1.59
   0  -2  -9    3.84    0.93
   0  -2  -9    3.51    0.70
   0   2  -9    3.30    0.87
   2  -2   9   44.15    2.19
  -2  -2  -9   41.46    2.34
  -2  -2  -9   42.49    2.00
  -2   2  -9   41.92    2.21
  -4  -2  -9    7.42    1.11
   4  -2   9    9.19    1.18
   4  -2   9    7.54    1.02
  -4   2  -9    9.24    1.31
   4   2   9   10.16    1.62
   6  -2   9   24.89    1.47
   6  -2   9   25.36    1.90
  -6  -2  -9   27.41    2.01
   6   2   9   24.71    2.26
  -8  -2  -9    4.83    1.31
   8  -2   9    5.23    1.52
  -8   2  -9    7.32    1.53
   8   2   9    7.89    1.85
 -13  -3   9   14.69    1.36
  13  -3  -9   18.10    2.13
 -13  -3   9   14.27    2.01
 -13   3   9   12.73    1.63
 -13   3   9   13.04    1.32
  13   3  -9   13.58    1.91
 -11  -3   9    2.33    0.83
  11  -3  -9    1.56    1.06
  11   3  -9    3.11    1.03
 -11   3   9    2.34    0.80
 -11   3   9    3.42    1.01
   9  -3  -9    6.19    1.27
  -9  -3   9   10.76    1.11
  -9   3   9    7.72    1.09
   9   3  -9    6.67    1.18
  -9   3   9    9.24    1.05
   7  -3  -9    4.85    1.07
  -7  -3   9    2.95    0.68
  -7   3   9    3.73    0.78
   7   3  -9    3.93    0.85
   5  -3  -9   41.43    2.21
  -5  -3   9   40.76    1.94
  -5   3   9   42.48    1.94
   5   3  -9   40.26    1.97
  -3  -3   9   15.49    1.27
   3  -3  -9   15.50    1.40
  -3   3   9   15.46    1.23
   3   3  -9   16.39    1.24
   1  -3  -9    9.23    1.22
  -1  -3   9   11.38    1.07
  -1   3   9    9.38    1.24
   1   3  -9   11.66    1.12
  -1  -3  -9    9.49    0.91
  -1  -3  -9    7.84    1.32
   1  -3   9    9.99    1.10
   1   3   9    8.70    1.19
  -1   3  -9    8.96    1.05
  -3  -3  -9   20.01    1.60
   3  -3   9   19.38    1.34
   3  -3   9   17.83    1.35
  -3  -3  -9   18.07    1.84
   3   3   9   20.96    1.39
  -3   3  -9   17.22    1.58
   5  -3   9    6.09    1.16
  -5  -3  -9    6.11    1.09
   5  -3   9    5.84    0.89
   5   3   9    6.75    1.03
  -5   3  -9    8.37    1.31
   7  -3   9   12.37    1.80
  -7  -3  -9   13.11    1.66
   7  -3   9   13.97    1.33
   7   3   9   14.33    1.33
  -7   3  -9   15.32    1.76
   7   3   9   11.33    1.86
 -12  -4   9   43.69    2.78
 -12  -4   9   37.74    2.12
  12  -4  -9   35.87    2.86
 -12   4   9   41.13    2.23
  12   4  -9   35.19    2.44
 -12   4   9   37.04    2.07
 -10  -4   9    6.82    1.12
  10  -4  -9    3.61    1.15
  10   4  -9    1.79    0.91
  10   4  -9    3.23    0.92
 -10   4   9    5.73    1.08
   8  -4  -9   75.76    3.50
  -8  -4   9   76.47    2.97
   8   4  -9   79.02    3.08
  -8   4   9   80.28    2.98
   6  -4  -9   20.95    1.85
  -6  -4   9   22.95    1.51
  -6   4   9   19.68    1.54
   6   4  -9   22.38    1.57
  -4  -4   9  103.77    3.56
   4  -4  -9  105.59    4.00
  -4   4   9  104.17    3.55
   4   4  -9  103.44    3.54
  -2  -4   9    2.95    0.82
   2  -4  -9    4.33    1.09
  -2   4   9    3.26    0.82
   2   4  -9    2.58    0.80
   0  -4  -9   45.37    2.58
   0  -4   9   41.92    2.09
   0   4   9   41.24    2.07
   0   4  -9   44.18    2.15
   2  -4   9    4.95    0.97
  -2  -4  -9    3.44    1.15
  -2   4  -9    3.68    0.94
   2   4   9    4.77    0.97
  -4  -4  -9   40.78    1.98
  -4  -4  -9   36.92    2.70
   4  -4   9   42.53    2.11
   4  -4   9   37.83    2.21
   4   4   9   37.61    2.00
  -4   4  -9   41.41    2.41
   6  -4   9    5.85    1.23
  -6  -4  -9    2.77    1.32
  -6  -4  -9    2.90    1.06
   6  -4   9    1.02    0.93
  -6   4  -9    2.29    1.01
   6   4   9    2.81    0.94
  11  -5  -9    6.98    1.72
 -11   5   9    8.44    1.32
  -9  -5   9   15.90    1.62
   9  -5  -9   17.64    2.05
  -9   5   9   15.27    1.56
   9   5  -9   17.28    1.66
   7  -5  -9    2.88    1.14
  -7  -5   9    4.39    1.00
   7   5  -9    1.54    0.91
  -7   5   9    3.69    0.96
   5  -5  -9    9.70    1.67
  -5  -5   9   11.96    1.30
  -5   5   9   10.95    1.50
   5   5  -9    9.26    1.29
   3  -5  -9   10.00    1.61
  -3  -5   9    8.53    1.34
   3   5  -9    7.80    1.20
  -3   5   9   10.70    1.31
   1  -5  -9   24.51    2.13
  -1  -5   9   25.98    1.76
   1   5  -9   26.91    1.77
  -1   5   9   26.19    1.80
  -1  -5  -9    0.36    0.94
   1  -5   9    2.23    0.87
  -1   5  -9    0.84    0.87
   1   5   9   -0.18    0.78
   3  -5   9   19.62    1.58
   3  -5   9   20.89    1.69
  -3  -5  -9   25.84    4.24
  -3   5  -9   18.55    1.81
   3   5   9   21.29    1.67
   5  -5   9   17.84    1.70
  -5  -5  -9   14.52    2.31
   5  -5   9   12.08    1.61
  -5   5  -9   14.69    1.78
   5   5   9   16.05    1.54
 -10  -6   9   31.68    2.13
  10  -6  -9   30.16    2.82
 -10  -6   9   25.88    2.17
  10   6  -9   25.80    2.15
 -10   6   9   30.59    2.03
   8  -6  -9   15.36    2.20
  -8  -6   9   18.67    1.75
  -8   6   9   18.95    1.73
   8   6  -9   15.99    1.79
  -6  -6   9   44.16    3.93
   6   6  -9   50.71    2.46
  -6   6   9   52.41    2.80
   4  -6  -9   20.14    2.14
   4   6  -9   17.08    1.63
   2  -6  -9    8.07    1.61
   2   6  -9    5.60    1.11
   0  -6   9   30.69    2.33
   0  -6  -9   24.38    2.49
   0   6  -9   34.50    2.05
  -2  -6  -9   33.84    2.77
   2  -6   9   35.61    2.26
   2   6   9   36.75    2.23
  -2   6  -9   33.31    2.88
   7  -7  -9   11.87    2.04
  -7  -7   9   14.34    1.84
  -7   7   9   14.03    1.76
   7   7  -9   12.82    1.67
  -5  -7   9    9.92    1.67
   5  -7  -9    5.72    1.58
  -5   7   9    9.63    1.53
   5   7  -9    9.27    1.46
  -3  -7   9   56.21    2.97
   3  -7  -9   50.10    3.48
   3   7  -9   55.11    2.79
  -3   7   9   58.49    2.85
   1  -7  -9   20.28    2.45
  -1  -7   9   14.98    1.93
   1   7  -9   20.68    1.91
  -1   7   9   18.72    1.88
 -14   0  10   50.65    2.10
 -14   0  10   55.64    3.07
  14   0 -10   51.55    3.10
 -12   0  10   20.76    1.32
  12   0 -10   18.22    1.89
 -12   0  10   20.92    1.84
  10   0 -10  122.47    4.08
 -10   0  10  120.09    3.70
  10   0 -10  120.48    3.95
  -8   0  10   65.24    2.44
  -8   0  10   59.42    2.23
   8   0 -10   63.67    2.48
   8   0 -10   65.92    2.43
  -6   0  10  159.80    4.56
   6   0 -10  155.80    4.54
   4   0 -10   16.84    1.16
  -4   0  10   18.98    1.47
   2   0 -10  423.41   10.01
  -2   0  10  425.46   10.58
   0   0 -10   19.90    1.39
   0   0  10   16.12    1.22
   2   0  10  175.90    5.12
  -2   0 -10  178.27    5.26
   2   0  10  172.41    4.85
  -4   0 -10   43.18    2.33
   4   0  10   42.35    1.87
   4   0  10   41.73    2.39
   6   0  10   97.70    4.23
   6   0  10   98.68    3.13
  -8   0 -10   17.05    1.98
   8   0  10   15.45    2.15
 -15  -1  10    1.04    1.26
  15  -1 -10    1.54    1.39
  15   1 -10    2.62    1.49
 -15   1  10    1.05    1.38
  13  -1 -10    2.36    1.14
 -13  -1  10    3.23    1.22
 -13  -1  10    2.90    0.77
 -13   1  10    2.76    0.81
  13   1 -10    1.93    1.03
 -13   1  10    2.02    1.03
 -11  -1  10   25.31    1.50
  11  -1 -10   23.27    1.87
  11   1 -10   24.71    1.70
 -11   1  10   23.63    1.77
 -11   1  10   24.86    1.47
  11   1 -10   23.96    1.70
   9  -1 -10    6.46    0.94
   9  -1 -10    6.02    1.04
  -9  -1  10    6.47    1.00
   9   1 -10    6.30    1.01
  -9   1  10    6.76    1.05
   7  -1 -10   59.15    2.24
   7  -1 -10   54.82    2.24
  -7  -1  10   58.13    2.31
   7   1 -10   56.64    2.36
  -7   1  10   57.71    2.29
  -5  -1  10   21.26    1.34
   5  -1 -10   18.86    1.20
   5  -1 -10   19.08    1.21
   5   1 -10   21.15    1.40
  -5   1  10   18.58    1.12
  -5   1  10   20.36    1.30
   3  -1 -10   66.31    2.31
  -3  -1  10   67.78    2.53
   3  -1 -10   62.47    2.29
   3  -1 -10   66.68    2.35
  -3   1  10   66.63    2.50
   3   1 -10   71.31    2.95
   1  -1 -10   29.13    1.55
   1  -1 -10   30.80    1.61
  -1  -1  10   32.21    1.66
   1  -1 -10   30.13    1.57
  -1   1  10   27.56    1.56
   1   1 -10   29.28    1.72
  -1  -1 -10   26.58    1.68
   1  -1  10   25.99    1.50
  -1  -1 -10   27.67    1.61
  -1   1 -10   28.83    1.74
   1   1  10   25.74    1.48
   3  -1  10    1.24    0.67
  -3  -1 -10    0.83    0.57
   3  -1  10    0.89    0.51
   3   1  10    1.21    0.54
  -3   1 -10    1.13    0.67
   3   1  10   -0.19    0.65
   5  -1  10   16.74    1.20
  -5  -1 -10   15.29    1.57
   5  -1  10   13.89    1.57
   5   1  10   16.32    1.75
   5   1  10   16.60    1.20
  -5   1 -10   15.88    1.64
   7  -1  10    0.39    1.16
  -7  -1 -10    2.18    1.03
  -7   1 -10    1.97    1.00
   7   1  10    0.37    1.05
  14  -2 -10   12.79    2.07
 -14  -2  10   11.63    1.21
 -14  -2  10   12.33    1.85
 -14   2  10   12.54    2.26
  14   2 -10   12.59    1.91
 -14   2  10    8.31    1.12
 -12  -2  10   94.57    3.20
  12  -2 -10   99.19    4.10
 -12   2  10   98.66    3.70
 -12   2  10  103.23    3.33
  12   2 -10   95.86    3.73
  10  -2 -10    9.68    1.34
 -10  -2  10   10.68    1.10
 -10   2  10    8.69    1.05
  10   2 -10    8.75    1.33
 -10   2  10    9.97    1.23
   8  -2 -10  129.08    4.24
   8  -2 -10  128.84    3.80
  -8  -2  10  129.19    3.98
  -8   2  10  128.81    3.97
   8   2 -10  130.05    4.14
   6  -2 -10    4.47    0.74
   6  -2 -10    4.07    0.90
  -6  -2  10    4.53    0.87
  -6   2  10    5.32    0.89
   6   2 -10    3.71    0.78
   4  -2 -10  356.90    8.32
   4  -2 -10  362.13    8.80
  -4  -2  10  357.52    8.77
   4   2 -10  352.85    8.78
  -4   2  10  358.81    8.73
   2  -2 -10   36.55    1.61
   2  -2 -10   37.04    1.90
  -2  -2  10   34.94    1.79
   2   2 -10   37.30    1.91
  -2   2  10   34.62    1.74
   0  -2 -10  159.19    4.85
   0  -2  10  154.81    4.54
   0  -2 -10  162.25    4.50
   0   2  10  151.31    4.50
   0   2 -10  153.42    4.76
  -2  -2 -10   19.89    1.44
  -2  -2 -10   18.22    1.69
   2  -2  10   18.16    1.35
   2   2  10   18.03    1.30
  -2   2 -10   18.00    1.54
  -4  -2 -10  114.43    3.97
   4  -2  10  114.65    3.63
   4  -2  10  111.52    3.92
   4   2  10  116.91    3.63
  -4   2 -10  110.35    4.16
   6  -2  10   32.62    1.71
  -6  -2 -10   36.21    2.21
   6  -2  10   29.34    2.23
  -6   2 -10   37.03    2.39
   6   2  10   32.83    1.73
   6   2  10   30.29    2.44
  13  -3 -10   17.13    2.17
 -13  -3  10   20.53    1.53
 -13  -3  10   20.43    2.26
 -13   3  10   15.78    1.91
 -13   3  10   17.80    1.60
  13   3 -10   17.41    1.95
  11  -3 -10    4.40    1.32
 -11  -3  10    5.66    1.02
  11   3 -10    4.74    1.09
 -11   3  10    4.94    1.00
 -11   3  10    4.81    1.00
  11   3 -10    3.99    1.02
   9  -3 -10   23.50    1.80
  -9  -3  10   24.63    1.62
   9   3 -10   24.40    1.82
  -9   3  10   27.86    1.64
  -9   3  10   26.19    1.58
   7  -3 -10    6.82    0.85
  -7  -3  10    3.56    0.84
   7  -3 -10    7.93    1.31
  -7   3  10    7.34    1.11
   7   3 -10    5.66    1.00
   5  -3 -10   28.68    1.83
  -5  -3  10   25.27    1.59
  -5   3  10   26.13    1.60
   5   3 -10   26.33    1.61
   3  -3 -10    0.32    0.53
  -3  -3  10    1.98    0.66
  -3   3  10    0.52    0.56
   3   3 -10    0.15    0.46
   1  -3 -10   38.93    2.27
  -1  -3  10   39.69    2.06
   1  -3 -10   39.21    1.65
   1   3 -10   41.03    2.06
  -1   3  10   40.93    2.02
  -1  -3 -10    3.65    0.82
   1  -3  10    2.31    0.72
  -1  -3 -10    4.15    1.01
   1   3  10    2.71    0.83
  -1   3 -10    3.68    1.07
   3  -3  10   44.85    2.10
  -3  -3 -10   42.60    2.68
  -3  -3 -10   42.27    2.14
  -3   3 -10   44.02    2.45
   3   3  10   44.17    2.07
  -5  -3 -10    1.80    0.86
  -5  -3 -10   -0.31    0.94
   5  -3  10    1.39    0.77
   5  -3  10   -0.66    0.78
  -5   3 -10   -0.09    0.88
   5   3  10    1.38    0.69
 -12  -4  10   30.47    1.98
  12  -4 -10   35.61    2.69
 -12   4  10   23.72    1.99
 -12   4  10   26.95    1.83
  12   4 -10   28.19    2.26
  10  -4 -10   12.58    1.80
 -10  -4  10   15.24    1.42
  10   4 -10   12.40    1.69
 -10   4  10   15.43    1.43
 -10   4  10   14.39    1.81
  -8  -4  10   40.99    2.17
   8  -4 -10   42.04    2.57
   8   4 -10   39.77    2.26
  -8   4  10   38.23    2.12
   6  -4 -10   30.35    2.16
  -6  -4  10   27.99    1.80
   6   4 -10   27.98    1.87
  -6   4  10   29.55    1.81
  -4  -4  10   44.48    2.23
   4  -4 -10   40.56    2.43
   4   4 -10   46.26    2.27
  -4   4  10   43.27    2.20
  -2  -4  10   44.63    2.20
   2  -4 -10   40.80    2.42
   2   4 -10   39.78    2.14
  -2   4  10   39.67    2.06
   0  -4 -10   73.30    3.42
   0  -4  10   79.62    3.07
   0   4  10   80.79    3.12
   0   4 -10   77.74    3.18
   2  -4  10   64.11    2.75
  -2  -4 -10   60.98    2.41
  -2  -4 -10   63.49    3.34
  -2   4 -10   59.18    2.89
   2   4  10   62.52    2.62
   4  -4  10   31.60    2.01
  -4  -4 -10   35.41    2.00
  -4  -4 -10   37.64    3.14
  -4   4 -10   33.11    2.30
   4   4  10   34.00    2.01
  11  -5 -10   58.48    3.57
 -11  -5  10   61.40    3.16
 -11   5  10   56.60    4.09
  11   5 -10   67.63    3.18
   9  -5 -10   14.71    3.73
  -9  -5  10   12.96    1.62
  -9   5  10   12.58    1.48
   7  -5 -10   23.58    2.19
  -7  -5  10   27.39    1.94
  -7   5  10   25.69    1.83
   7   5 -10   24.90    1.83
  -5  -5  10    6.58    1.31
   5  -5 -10    7.06    1.51
  -5   5  10    7.51    1.33
   5   5 -10    6.11    1.12
  -3  -5  10   32.70    2.04
   3  -5 -10   30.86    2.30
  -3   5  10   32.64    2.03
   3   5 -10   32.10    2.03
  -1  -5  10    2.71    1.07
   1  -5 -10    3.81    1.28
  -1   5  10    4.80    1.07
   1   5 -10    5.39    1.09
  -1  -5 -10   40.01    2.81
   1  -5  10   43.31    2.35
   1   5  10   38.26    2.17
  -1   5 -10   43.02    2.33
   3  -5  10    0.01    0.89
  -3  -5 -10    0.71    1.32
   3   5  10    2.03    1.00
  -3   5 -10    0.72    0.98
   8  -6 -10    7.92    1.62
  -8  -6  10    7.05    1.50
  -8   6  10    7.17    1.40
   8   6 -10    5.55    1.32
  -6  -6  10   44.90    2.61
   6  -6 -10   41.04    2.96
  -6   6  10   41.52    2.41
   6   6 -10   44.79    2.41
  -4  -6  10    7.03    1.33
   4  -6 -10    7.61    1.86
  -4   6  10    6.29    1.22
   4   6 -10    3.44    1.05
  -2  -6  10   41.35    2.47
   2  -6 -10   38.40    2.79
   2   6 -10   39.97    2.30
  -2   6  10   37.49    2.34
   0  -6 -10   18.80    2.30
   0  -6  10   25.81    1.99
   0   6  10   21.99    1.88
  -2  -6 -10   37.98    3.12
   2  -6  10   35.13    2.39
   2   6  10   38.74    2.33
  -2   6 -10   41.49    2.56
   5  -7 -10   22.69    2.55
  -3  -7  10    7.02    1.41
   3  -7 -10    6.74    2.00
  -3   7  10    9.33    1.48
   3   7 -10    5.39    1.50
 -14   0  11    1.41    0.76
  14   0 -11    0.90    1.20
 -14   0  11    1.49    1.09
  12   0 -11   -1.15    0.80
 -12   0  11    0.30    0.54
  10   0 -11    2.98    0.74
 -10   0  11    1.45    0.66
  10   0 -11    2.37    0.80
  -8   0  11    0.84    0.58
   8   0 -11    1.67    0.58
   6   0 -11    0.74    0.44
  -6   0  11    0.83    0.45
   4   0 -11    0.06    0.48
  -4   0  11    0.33    0.61
  -2   0  11   -0.19    0.46
   2   0 -11    0.29    0.50
   0   0 -11    0.70    0.58
   0   0  11    0.39    0.53
   2   0  11    0.36    0.52
  -2   0 -11   -0.90    0.65
  -4   0 -11    0.02    0.77
   4   0  11   -0.17    0.52
   4   0  11    0.52    0.79
   6   0  11    0.81    0.70
   6   0  11   -1.65    0.98
  -6   0 -11    0.29    0.82
 -13  -1  11    6.53    1.42
 -13  -1  11    6.29    0.96
  13  -1 -11    5.95    1.42
 -13   1  11    7.18    1.08
 -13   1  11    6.82    1.28
  13   1 -11    5.40    1.29
  11  -1 -11   21.61    1.85
 -11  -1  11   22.57    1.47
  11   1 -11   24.17    1.87
 -11   1  11   22.15    1.42
  11   1 -11   26.89    1.76
  -9  -1  11   29.39    1.67
   9  -1 -11   30.34    1.74
   9  -1 -11   28.70    1.82
   9   1 -11   31.81    1.85
  -9   1  11   31.64    1.71
  -7  -1  11    8.29    1.01
   7  -1 -11    9.11    1.00
   7  -1 -11    8.30    0.99
  -7   1  11    8.45    1.18
   7   1 -11    9.02    1.02
   5  -1 -11   30.50    1.59
  -5  -1  11   28.99    1.71
   5   1 -11   31.46    1.67
  -5   1  11   28.87    1.66
   3  -1 -11   26.61    1.51
  -3  -1  11   27.47    1.63
   3   1 -11   27.27    1.57
  -3   1  11   25.21    1.56
   1  -1 -11   11.82    1.15
   1  -1 -11   10.42    1.08
  -1  -1  11   12.02    1.11
  -1   1  11   10.22    1.08
   1   1 -11   12.82    1.21
  -1  -1 -11    8.01    1.25
  -1  -1 -11    8.07    1.25
   1  -1  11    9.72    1.06
  -1   1 -11    8.42    1.30
   1   1  11    7.39    1.12
   3  -1  11    8.72    1.06
   3  -1  11    9.08    1.29
  -3  -1 -11    9.88    1.51
   3   1  11    9.94    1.07
  -3   1 -11   10.27    1.49
   5  -1  11    9.93    1.50
   5  -1  11    8.84    1.06
  -5  -1 -11    9.87    1.56
   5   1  11    8.28    1.59
   5   1  11    8.50    1.00
  -5   1 -11    9.57    1.54
  14  -2 -11    0.46    1.22
 -14  -2  11    0.13    1.14
 -14  -2  11    2.74    0.81
  14   2 -11   -1.65    1.30
 -14   2  11    2.84    0.95
 -14   2  11    0.52    1.07
  12  -2 -11    2.28    0.99
 -12  -2  11    1.69    0.79
 -12   2  11    1.81    0.87
  12   2 -11   -0.43    1.83
 -12   2  11    0.66    0.96
 -10  -2  11   18.39    1.42
  10  -2 -11   18.54    1.70
  10   2 -11   16.44    1.56
 -10   2  11   20.50    1.43
   8  -2 -11    3.18    0.73
  -8  -2  11    2.75    0.76
   8  -2 -11    2.79    0.80
  -8   2  11    2.43    0.75
   8   2 -11    2.02    0.77
   6  -2 -11   13.96    1.08
  -6  -2  11   13.37    1.21
   6  -2 -11   12.03    1.30
  -6   2  11   14.75    1.23
   6   2 -11   13.13    1.29
   4  -2 -11    4.59    0.76
   4  -2 -11    3.84    0.78
  -4  -2  11    3.70    0.87
  -4   2  11    3.04    0.87
   4   2 -11    3.36    0.83
  -2  -2  11   55.92    2.36
   2  -2 -11   57.25    2.47
   2  -2 -11   54.65    2.13
  -2   2  11   54.09    2.33
   2   2 -11   55.41    2.48
   0  -2 -11   10.46    1.24
   0  -2 -11    9.01    1.01
   0  -2  11    7.93    1.15
   0   2  11    8.08    1.12
   0   2 -11    9.26    1.43
  -2  -2 -11   45.27    2.55
  -2  -2 -11   39.64    2.11
   2  -2  11   40.70    2.00
   2   2  11   39.71    1.99
  -2   2 -11   40.17    2.36
   4  -2  11    9.24    1.79
  -4  -2 -11   11.17    1.30
   4  -2  11   10.47    1.22
   4   2  11    8.46    1.13
  -4   2 -11    9.20    1.56
   6  -2  11    3.30    0.97
   6  -2  11    4.72    1.39
  -6  -2 -11    4.12    1.18
  -6   2 -11    5.48    1.34
  13  -3 -11    0.06    1.16
 -13  -3  11    1.96    0.87
 -13   3  11    1.97    0.92
 -13   3  11   -1.10    1.08
  13   3 -11    1.90    1.15
  11  -3 -11    7.68    1.58
 -11  -3  11    8.29    1.24
  11   3 -11    5.84    1.17
 -11   3  11    6.74    1.10
 -11   3  11    7.07    1.24
   9  -3 -11    2.87    0.93
  -9  -3  11    2.49    0.83
  -9   3  11    3.54    1.00
   9   3 -11    3.29    0.90
   7  -3 -11    6.54    0.89
  -7  -3  11    4.61    0.98
   7  -3 -11    7.68    1.29
  -7   3  11    8.79    1.26
   7   3 -11    6.52    1.12
  -5  -3  11    3.65    0.92
   5  -3 -11    4.92    0.74
   5  -3 -11    6.76    1.21
   5   3 -11    4.85    0.93
  -5   3  11    3.65    0.91
  -3  -3  11   16.92    1.44
   3  -3 -11   15.28    1.02
   3  -3 -11   14.71    1.47
  -3   3  11   15.36    1.35
   3   3 -11   17.87    1.47
   1  -3 -11    7.07    0.91
   1  -3 -11    6.67    1.24
  -1  -3  11    6.13    1.16
   1   3 -11    9.09    1.40
  -1   3  11    7.55    1.08
  -1  -3 -11    6.43    1.09
  -1  -3 -11    5.57    1.15
   1   3  11    6.36    1.14
  -1   3 -11    5.95    1.17
  -3  -3 -11   12.12    1.49
  -3  -3 -11    7.89    1.42
   3  -3  11   11.17    1.32
  -3   3 -11    9.21    1.88
   3   3  11   10.19    1.26
  -5  -3 -11   12.66    1.62
  -5  -3 -11   14.18    2.59
   5  -3  11    7.81    1.48
  -5   3 -11   13.70    1.90
   5   3  11   14.23    1.44
  12  -4 -11   43.23    3.02
 -12  -4  11   40.13    2.33
 -12   4  11   41.85    2.40
  12   4 -11   35.86    2.55
 -12   4  11   44.49    2.40
  10  -4 -11    8.41    1.60
 -10  -4  11    9.49    1.43
 -10   4  11   11.00    1.41
  10   4 -11    9.23    1.44
   8  -4 -11   64.42    3.22
  -8  -4  11   65.03    2.88
  -8   4  11   65.04    2.85
   8   4 -11   65.42    2.98
   6  -4 -11    9.33    1.52
  -6  -4  11    8.79    1.31
  -6   4  11    8.88    1.32
   6   4 -11    9.44    1.34
  -4  -4  11   50.79    2.52
   4  -4 -11   50.26    2.66
   4   4 -11   51.21    2.50
  -4   4  11   52.72    2.51
   2  -4 -11   16.97    1.63
  -2  -4  11   15.03    1.44
   2   4 -11   15.51    1.54
  -2   4  11   15.24    1.44
   0  -4  11   80.05    3.24
   0  -4 -11   78.97    3.69
   0   4 -11   75.65    3.29
   0   4  11   83.77    3.23
  -2  -4 -11   13.15    1.88
   2  -4  11   10.68    1.39
  -2  -4 -11   11.60    1.25
  -2   4 -11   13.48    1.70
   2   4  11   14.28    1.42
  -4  -4 -11   37.78    2.87
  -4  -4 -11   34.33    2.13
   4  -4  11   38.90    2.23
   4   4  11   34.41    2.10
  -4   4 -11   36.94    2.50
  11  -5 -11   -1.02    1.14
 -11  -5  11    2.94    1.24
  11   5 -11    1.61    1.26
 -11   5  11    2.43    1.04
   9  -5 -11    1.40    1.29
  -9  -5  11    2.67    1.12
   9   5 -11    2.29    1.07
  -9   5  11    3.69    1.10
   7  -5 -11    3.93    1.26
  -7   5  11    1.62    1.11
   7   5 -11    1.97    1.03
   5  -5 -11   12.67    2.01
  -5  -5  11   14.77    2.63
   5   5 -11   10.25    1.56
   3  -5 -11    7.71    1.55
   3   5 -11    8.24    1.33
  -3   5  11    8.68    2.12
   1  -5 -11    1.59    1.04
   1   5 -11    2.77    0.98
  -1  -5 -11    2.53    1.69
   1  -5  11    3.31    1.07
  -1   5 -11    3.73    1.18
   1   5  11    5.35    1.54
  -3  -5 -11    0.05    1.31
   3  -5  11    2.20    1.08
   3   5  11    1.52    0.99
  -3   5 -11    2.85    1.21
   8  -6 -11   38.18    3.02
  -8  -6  11   38.78    2.42
   8   6 -11   35.07    2.34
  -8   6  11   37.03    2.45
  -6  -6  11   35.57    2.42
   6  -6 -11   38.21    2.88
  -6   6  11   40.99    2.40
   6   6 -11   41.12    2.44
   4  -6 -11   15.78    2.32
  -4  -6  11   10.51    1.76
   4   6 -11   12.69    1.66
  -4   6  11   12.87    1.65
  -2  -6  11   76.18    3.45
   2  -6 -11   74.37    4.02
  -2   6  11   76.65    3.38
   2   6 -11   78.66    3.37
   0  -6  11   17.53    2.00
   0  -6 -11   16.56    2.49
   0   6 -11   21.09    1.91
   0   6  11   19.74    1.92
 -14   0  12   65.02    2.66
  14   0 -12   58.83    3.36
 -14   0  12   62.59    3.35
 -12   0  12   67.58    2.75
  12   0 -12   61.67    3.02
  10   0 -12   50.81    2.45
 -10   0  12   53.70    2.38
  10   0 -12   48.62    2.25
   8   0 -12    5.34    0.92
  -8   0  12    4.96    0.93
   6   0 -12  172.03    4.98
  -6   0  12  171.89    5.06
   4   0 -12   57.68    2.40
  -4   0  12   57.66    2.48
   2   0 -12   84.73    3.11
  -2   0  12   81.66    3.07
   0   0 -12   83.93    3.25
   0   0  12   83.41    3.08
  -2   0 -12  145.94    4.83
   2   0  12  143.69    4.43
   4   0  12   45.69    2.11
   4   0  12   42.77    2.58
  -4   0 -12   47.82    2.68
  13  -1 -12   14.19    1.94
 -13  -1  12   17.09    1.53
 -13   1  12   12.21    1.49
  13   1 -12   16.82    1.85
 -13   1  12   16.70    2.89
  11  -1 -12    4.26    1.10
 -11  -1  12    4.30    0.87
  11   1 -12    4.14    1.12
 -11   1  12    4.59    1.00
  -9  -1  12   15.84    1.38
   9  -1 -12   16.05    1.47
   9  -1 -12   15.21    1.34
  -9   1  12   16.62    1.37
   9   1 -12   16.84    1.51
  -7  -1  12   19.45    1.44
   7  -1 -12   20.53    1.35
   7  -1 -12   20.23    1.38
   7   1 -12   22.33    1.54
  -7   1  12   18.95    1.43
   5  -1 -12    5.16    1.00
  -5  -1  12    5.32    1.01
  -5   1  12    4.40    0.88
   5   1 -12    5.35    0.86
   3  -1 -12   -0.78    0.51
  -3  -1  12    0.41    0.51
   3   1 -12    0.15    0.53
  -3   1  12    0.77    0.51
   1  -1 -12   34.79    1.78
   1  -1 -12   37.25    1.98
  -1  -1  12   35.91    1.93
   1   1 -12   37.87    2.05
  -1   1  12   39.66    2.01
   1  -1  12    4.41    0.95
  -1  -1 -12    4.19    1.01
  -1  -1 -12    4.84    1.02
  -1   1 -12    5.64    1.12
   1   1  12    5.62    1.02
  -3  -1 -12   17.06    1.68
   3  -1  12   15.56    1.43
  -3  -1 -12   16.48    1.79
   3   1  12   17.10    1.41
   5  -1  12    9.25    1.47
   5  -1  12    9.94    1.26
  -5  -1 -12   10.12    1.62
   5   1  12   12.00    1.33
  -5   1 -12   11.69    1.65
   5   1  12   10.76    1.93
 -12  -2  12   24.47    1.86
  12  -2 -12   29.40    2.27
  12   2 -12   25.39    2.16
 -12   2  12   24.71    2.07
 -12   2  12   27.20    1.84
 -10  -2  12   12.54    1.40
  10  -2 -12   14.41    1.55
 -10   2  12   12.91    1.38
  10   2 -12   14.21    1.53
   8  -2 -12   63.63    2.90
  -8  -2  12   67.67    2.84
   8  -2 -12   66.08    2.55
   8   2 -12   69.37    2.94
  -8   2  12   67.52    2.78
   6  -2 -12   62.71    2.64
   6  -2 -12   63.61    2.70
  -6  -2  12   63.35    2.68
   6   2 -12   64.20    2.76
  -6   2  12   64.45    2.69
   4  -2 -12   82.56    3.09
  -4  -2  12   77.65    3.17
   4   2 -12   83.05    3.20
  -4   2  12   87.05    4.00
   2  -2 -12   32.56    1.66
   2  -2 -12   30.99    1.85
  -2  -2  12   31.42    1.88
   2   2 -12   33.92    1.96
  -2   2  12   33.08    1.92
   0  -2  12  117.19    3.99
   0  -2 -12  117.64    4.32
   0  -2 -12  118.24    3.89
   0   2 -12  123.53    4.29
   0   2  12  118.52    3.96
   2  -2  12   10.25    1.26
  -2  -2 -12   11.37    1.59
  -2  -2 -12   11.94    1.35
   2   2  12    9.32    1.27
  -2   2 -12   10.40    1.70
  -4  -2 -12  142.79    4.92
   4  -2  12  143.43    4.47
   4  -2  12  131.13    4.74
  -4  -2 -12  149.81    5.47
  -4   2 -12  138.31    5.08
   4   2  12  153.41    4.55
 -13  -3  12   13.28    1.60
  13  -3 -12    9.84    1.94
 -13   3  12   10.78    1.49
 -13   3  12   11.04    1.74
 -11  -3  12   34.29    2.11
  11  -3 -12   35.69    2.63
 -11   3  12   34.67    2.08
  11   3 -12   32.07    2.26
 -11   3  12   39.07    2.10
   9  -3 -12   15.00    1.66
  -9  -3  12   14.65    1.51
  -9   3  12   16.72    1.51
   9   3 -12   18.18    1.68
   7  -3 -12   55.43    2.19
  -7  -3  12   60.74    2.66
   7  -3 -12   61.24    2.90
  -7   3  12   58.06    2.59
   7   3 -12   61.62    2.77
   5  -3 -12   31.36    1.52
   5  -3 -12   30.22    2.00
  -5  -3  12   31.20    1.90
  -5   3  12   32.31    1.89
   5   3 -12   31.19    1.98
  -3  -3  12   37.96    2.12
   3  -3 -12   37.32    2.23
   3  -3 -12   38.55    1.73
   3   3 -12   38.30    2.16
  -3   3  12   37.12    2.01
  -1  -3  12    8.58    1.33
   1  -3 -12   10.18    1.43
   1  -3 -12    9.73    1.39
   1   3 -12   11.19    1.42
  -1   3  12   12.81    1.31
  -1  -3 -12    2.59    1.11
   1  -3  12    2.41    0.94
  -1  -3 -12    4.72    0.98
   1   3  12    2.79    0.94
  -3  -3 -12   13.03    1.51
  -3  -3 -12   11.67    1.90
   3  -3  12   14.53    1.50
   3   3  12   12.67    1.38
  -3   3 -12   12.12    1.72
  12  -4 -12    9.57    1.82
 -12  -4  12    8.82    1.46
 -12   4  12    9.91    1.51
  12   4 -12   10.48    1.62
 -12   4  12   11.30    1.58
  10  -4 -12   24.18    2.33
  10   4 -12   25.42    2.00
  -8  -4  12   29.56    2.02
   8  -4 -12   30.09    2.30
  -8   4  12   29.68    2.05
  -6  -4  12   37.25    2.25
   6  -4 -12   39.65    2.48
  -6   4  12   38.15    2.23
   6   4 -12   37.22    2.32
   4  -4 -12   41.53    2.50
  -4  -4  12   39.74    2.29
  -4   4  12   36.76    2.21
   4   4 -12   37.58    2.30
   2  -4 -12   62.57    3.14
  -2  -4  12   56.56    2.82
  -2   4  12   56.77    2.75
   2   4 -12   57.21    2.85
   0  -4 -12   26.72    2.28
   0  -4  12   29.77    2.04
   0   4  12   26.75    1.91
   0   4 -12   26.55    2.03
  -2  -4 -12   32.09    1.90
  -2  -4 -12   32.37    2.82
  -2   4 -12   30.81    2.26
   2   4  12   32.53    2.64
  -9  -5  12   58.40    2.91
   9  -5 -12   48.17    3.12
   9   5 -12   55.67    2.89
  -9   5  12   52.47    2.74
   7  -5 -12   23.40    2.34
  -7  -5  12   26.15    2.05
  -7   5  12   26.64    2.08
   7   5 -12   27.99    2.09
  -5  -5  12   38.12    2.50
   5  -5 -12   44.99    2.88
   5   5 -12   45.08    2.62
  -5   5  12   46.64    2.48
  -3  -5  12   27.08    2.12
   3  -5 -12   29.11    2.35
  -3   5  12   23.55    1.93
   3   5 -12   31.66    2.17
   1  -5 -12    9.03    2.87
  -1  -5  12    8.82    1.49
  -1   5  12    7.98    1.44
   1   5 -12   13.48    1.65
   1  -5  12    2.65    1.13
  -1  -5 -12    3.34    1.34
  -1   5 -12    4.43    1.39
   1   5  12    5.83    1.22
   6  -6 -12   17.52    2.28
  -6  -6  12   18.11    1.98
  -6   6  12   20.53    1.90
   6   6 -12   19.31    1.97
  -4  -6  12   10.70    1.67
   4  -6 -12    9.68    1.89
  -4   6  12   14.15    1.87
   4   6 -12   12.54    1.83
   2  -6 -12   34.22    2.87
  -2  -6  12   32.81    2.31
   2   6 -12   36.37    2.46
  -2   6  12   32.20    2.27
 -12   0  13    1.68    0.82
  12   0 -13    0.30    0.84
  12   0 -13   -0.72    0.92
 -10   0  13    1.17    0.81
  10   0 -13    1.17    0.77
  -8   0  13   -0.48    0.58
   8   0 -13    0.34    0.67
  -6   0  13    0.11    0.59
   6   0 -13    0.94    0.63
   4   0 -13    0.30    0.55
  -4   0  13   -0.46    0.57
   2   0 -13   -0.62    0.50
  -2   0  13    0.50    0.69
   0   0 -13    0.55    0.79
   0   0  13    1.12    0.73
   2   0  13   -0.05    0.73
  -2   0 -13    0.14    0.95
  -2   0 -13   -0.47    0.90
   4   0  13   -0.41    0.72
  -4   0 -13   -1.06    0.92
  13  -1 -13   31.30    2.53
 -13  -1  13   34.27    2.01
 -13   1  13   32.39    2.02
  13   1 -13   35.72    2.37
 -13   1  13   34.77    2.33
  11  -1 -13   15.62    1.75
  11  -1 -13   18.55    1.69
 -11  -1  13   18.64    1.49
 -11   1  13   18.26    1.44
   9  -1 -13   28.69    1.86
  -9  -1  13   28.52    1.87
   9   1 -13   29.46    1.93
  -9   1  13   29.91    1.88
   7  -1 -13   19.92    1.43
  -7  -1  13   20.20    1.57
  -7   1  13   22.78    1.58
   7   1 -13   21.55    1.64
  -5  -1  13   18.31    1.47
   5  -1 -13   15.90    1.29
  -5   1  13   16.57    1.40
   5   1 -13   16.32    1.47
   3  -1 -13   20.95    1.49
  -3  -1  13   21.19    1.59
  -3   1  13   19.95    1.56
   3   1 -13   20.66    1.61
   1  -1 -13   33.35    1.93
  -1  -1  13   31.89    1.96
  -1   1  13   31.64    1.89
   1   1 -13   29.48    1.93
  -1  -1 -13   11.32    2.51
  -1  -1 -13    9.78    1.49
   1  -1  13    9.77    1.25
   1   1  13    8.99    1.25
  -1   1 -13    9.72    1.45
  -3  -1 -13   13.77    1.93
  -3  -1 -13   13.69    1.79
   3  -1  13   15.12    1.43
   3   1  13   14.48    1.43
  -3   1 -13   15.66    1.87
 -12  -2  13    1.58    0.96
  12  -2 -13    2.32    1.28
 -12   2  13    2.59    0.92
  12   2 -13    0.43    1.01
 -12   2  13    2.13    1.08
 -10  -2  13   20.45    1.68
  10  -2 -13   17.48    1.72
  10  -2 -13   19.32    1.57
 -10   2  13   19.49    1.62
  10   2 -13   18.99    2.14
  -8  -2  13    6.84    1.26
   8  -2 -13    7.30    1.06
  -8   2  13    7.70    1.30
   8   2 -13    6.05    1.23
   6  -2 -13   36.97    1.83
   6  -2 -13   33.22    1.95
  -6  -2  13   36.59    2.12
   6   2 -13   38.16    2.20
  -6   2  13   36.09    2.04
   4  -2 -13   24.87    1.52
  -4  -2  13   25.04    1.79
   4  -2 -13   24.69    1.65
  -4   2  13   25.52    1.72
   4   2 -13   23.92    1.80
  -2  -2  13   23.61    1.82
   2  -2 -13   24.63    1.58
   2  -2 -13   26.23    1.75
  -2   2  13   28.84    1.85
   2   2 -13   27.17    1.92
   0  -2 -13   25.97    1.81
   0  -2 -13   27.89    1.97
   0  -2  13   29.87    1.93
   0   2 -13   27.80    2.12
   0   2  13   31.89    1.92
  -2  -2 -13    4.23    1.07
   2  -2  13    4.62    1.13
  -2  -2 -13    1.23    0.76
   2   2  13    2.74    0.93
  -2   2 -13    4.39    1.34
  -4  -2 -13   18.85    2.38
  -4  -2 -13   17.68    1.85
  -4   2 -13   15.73    1.92
  11  -3 -13    8.26    1.60
  11   3 -13    8.61    1.61
 -11   3  13   10.14    1.43
 -11   3  13    5.63    1.80
   9  -3 -13    1.06    1.01
  -9  -3  13    1.97    0.86
   9  -3 -13    1.48    0.77
   9   3 -13    1.64    0.99
  -9   3  13    1.89    0.87
  -7  -3  13    7.52    1.37
   7  -3 -13    7.81    1.00
   7  -3 -13    9.03    1.38
   7   3 -13    8.69    1.32
  -7   3  13    8.76    1.45
   5  -3 -13    1.66    0.87
   5  -3 -13    1.55    1.03
  -5  -3  13    1.52    0.87
   5   3 -13    0.00    0.74
  -5   3  13    1.54    0.70
   3  -3 -13   15.04    1.59
   3  -3 -13   15.29    1.19
  -3  -3  13   16.58    1.52
   3   3 -13   14.38    1.55
  -3   3  13   14.85    1.45
   1  -3 -13    5.74    0.87
   1  -3 -13    3.49    1.11
  -1  -3  13    3.48    1.04
   1   3 -13   10.31    2.44
  -1   3  13    5.41    1.18
   1  -3  13    0.67    0.88
  -1  -3 -13    3.22    1.15
  -1  -3 -13    1.29    0.84
  -1   3 -13    0.16    0.90
   1   3  13    1.36    0.85
  -3  -3 -13   13.80    1.70
  -3  -3 -13   12.15    2.01
   3  -3  13    9.49    1.55
  -3   3 -13    9.79    1.55
  10  -4 -13    2.62    1.26
 -10  -4  13    4.14    1.31
 -10   4  13    2.43    1.03
  10   4 -13    3.27    1.18
  -8  -4  13   32.65    2.18
   8  -4 -13   33.15    2.48
  -8   4  13   30.89    2.13
   8   4 -13   29.16    2.21
   6  -4 -13    9.95    1.61
  -6  -4  13    8.63    1.57
   6   4 -13   14.71    1.58
  -6   4  13   13.72    1.75
  -4  -4  13   44.08    2.56
   4  -4 -13   48.69    2.75
  -4   4  13   47.42    2.48
   4   4 -13   54.15    2.68
   2  -4 -13   14.82    1.99
  -2  -4  13    9.99    1.59
  -2   4  13   12.22    1.78
   2   4 -13   11.72    1.63
   0  -4 -13   36.50    2.63
   0  -4  13   34.38    2.28
   0   4 -13   38.33    2.44
   0   4  13   34.64    2.20
   7  -5 -13   18.31    2.74
  -7  -5  13   20.03    1.96
   7   5 -13   15.54    1.96
  -7   5  13   18.36    1.80
  -5  -5  13    4.69    1.15
   5  -5 -13    4.41    1.69
   5   5 -13    2.67    1.19
  -5   5  13    1.60    1.00
  -3  -5  13   20.67    1.88
   3   5 -13   16.56    1.90
  -3   5  13   17.85    1.82
   1  -5 -13    8.21    1.72
  -1  -5  13    8.83    1.48
   1   5 -13   10.09    1.54
  -1   5  13    8.66    1.47
 -12   0  14   33.14    2.57
  12   0 -14   26.97    2.09
 -10   0  14   88.74    3.42
  10   0 -14   87.87    3.47
   8   0 -14    4.39    1.05
  -8   0  14    3.28    0.96
   6   0 -14   78.63    3.15
  -6   0  14   80.19    3.26
   4   0 -14    6.09    1.09
  -4   0  14    8.14    1.29
   2   0 -14  149.60    4.85
  -2   0  14  149.09    4.84
   0   0 -14   12.68    1.52
   0   0  14   10.40    1.27
   2   0  14   55.17    2.65
  -2   0 -14   61.60    3.05
  13  -1 -14   16.19    2.17
  13   1 -14   14.55    1.88
  11  -1 -14   22.26    1.73
 -11  -1  14   19.32    1.93
  11  -1 -14   25.80    2.01
  11   1 -14   23.61    1.97
 -11   1  14   21.72    2.17
  -9  -1  14   58.87    2.81
   9  -1 -14   60.67    2.56
  -9   1  14   59.21    2.76
   9   1 -14   58.61    2.81
   7  -1 -14   11.11    1.24
  -7  -1  14    7.66    1.29
  -7   1  14   10.63    1.32
   7   1 -14   10.92    1.39
   5  -1 -14   64.94    2.66
  -5  -1  14   59.14    2.79
   5   1 -14   63.36    2.82
  -5   1  14   58.17    2.73
  -3  -1  14   16.70    1.59
   3  -1 -14   15.05    1.44
   3   1 -14   16.90    1.55
  -3   1  14   17.33    1.56
  -1  -1  14   32.74    2.01
   1  -1 -14   30.87    1.97
  -1   1  14   33.43    1.99
   1   1 -14   31.75    2.21
  -1  -1 -14   42.33    2.40
  -1  -1 -14   44.44    2.59
   1  -1  14   42.57    2.31
   1   1  14   42.39    2.26
  -1   1 -14   43.12    2.60
  -3  -1 -14   14.76    1.99
  -3  -1 -14   19.18    1.75
  -3   1 -14   16.32    1.98
  12  -2 -14   26.99    2.48
 -12  -2  14   29.18    2.07
  12   2 -14   23.12    2.13
 -12   2  14   29.45    1.95
  10  -2 -14   -0.12    0.81
 -10  -2  14    2.02    1.55
  10  -2 -14    0.74    0.90
 -10   2  14    1.54    0.98
  10   2 -14    1.82    0.95
   8  -2 -14   44.34    2.74
  -8  -2  14   49.20    3.11
   8  -2 -14   54.77    2.36
  -8   2  14   48.86    3.08
   6  -2 -14   11.35    1.51
   6  -2 -14   12.90    1.30
  -6  -2  14   11.28    1.37
   6   2 -14   11.83    1.49
  -6   2  14   10.10    1.29
   4  -2 -14   34.63    2.05
   4  -2 -14   36.69    1.95
  -4  -2  14   34.06    2.13
  -4   2  14   38.46    2.16
   4   2 -14   37.62    2.26
   2  -2 -14    8.27    1.59
  -2  -2  14    6.97    1.35
   2  -2 -14    5.67    1.03
  -2   2  14    5.73    1.17
   0  -2 -14   27.09    1.97
   0  -2 -14   25.54    1.89
   0   2 -14   27.75    2.09
  -2  -2 -14   45.13    3.21
  -2  -2 -14   46.04    2.96
   2  -2  14   42.75    2.36
   2   2  14   46.30    2.46
  -2   2 -14   43.83    2.77
 -11  -3  14   44.37    2.54
  11  -3 -14   44.64    2.93
  11   3 -14   50.42    2.80
 -11   3  14   47.79    2.58
 -11   3  14   46.73    2.58
  -9  -3  14    2.40    1.16
   9  -3 -14    4.66    1.21
   9  -3 -14    5.99    1.12
   9   3 -14    5.56    1.27
  -9   3  14    7.02    1.26
   7  -3 -14   83.38    3.51
  -7  -3  14   87.27    3.58
   7  -3 -14   83.87    2.92
  -7   3  14   85.11    3.46
   7   3 -14   86.43    3.56
   5  -3 -14    7.77    1.01
  -5  -3  14    6.13    1.28
   5  -3 -14    6.70    1.20
  -5   3  14    6.91    1.16
   5   3 -14    5.91    1.19
   3  -3 -14   72.80    3.26
   3  -3 -14   75.54    2.81
  -3  -3  14   73.07    3.27
  -3   3  14   77.08    3.26
   3   3 -14   80.46    3.43
   1  -3 -14   13.54    1.77
   1  -3 -14   12.54    1.34
  -1  -3  14   13.69    1.54
   1   3 -14   12.51    1.83
  -1   3  14   14.35    1.52
  -1  -3 -14   78.10    3.32
  -1  -3 -14   86.98    4.00
   1  -3  14   81.32    3.49
   1   3  14   89.62    3.50
  -1   3 -14   80.47    3.70
   8  -4 -14   10.14    1.69
  -8  -4  14    7.99    1.37
   8   4 -14   11.25    1.67
  -8   4  14    9.46    1.59
   6  -4 -14   14.77    1.86
  -6  -4  14   11.19    1.69
   6   4 -14   13.82    1.69
  -6   4  14   11.68    1.51
   4  -4 -14   14.31    1.81
  -4  -4  14   14.31    1.68
  -4   4  14   16.79    1.69
   4   4 -14   15.04    1.67
  -2  -4  14    5.86    1.17
   2  -4 -14    4.91    1.37
  -2   4  14    5.34    1.41
   2   4 -14    5.68    1.25
  12   0 -15    0.17    0.98
 -12   0  15    0.84    0.88
  10   0 -15   -1.09    0.72
 -10   0  15    0.07    0.85
  -8   0  15    1.96    0.90
   8   0 -15    1.90    0.88
   6   0 -15   -0.42    0.79
  -6   0  15   -0.53    0.73
   4   0 -15    0.24    0.72
  -4   0  15    0.89    0.68
  -2   0  15    0.54    0.85
   2   0 -15    0.39    1.44
   0   0  15   -0.69    0.72
   0   0 -15    0.38    0.86
  11  -1 -15    2.28    1.08
 -11  -1  15    4.10    1.21
 -11   1  15    4.17    1.11
  11   1 -15    2.80    1.06
   9  -1 -15    8.90    1.28
  -9  -1  15    9.34    1.48
   9   1 -15    9.02    1.45
  -9   1  15    8.43    1.35
  -7  -1  15   14.01    1.54
   7  -1 -15   11.36    1.32
  -7   1  15   12.74    1.50
   5  -1 -15   28.29    1.77
  -5  -1  15   30.31    2.07
   5   1 -15   27.70    3.01
  -5   1  15   30.37    2.05
  -3  -1  15    6.35    1.26
   3  -1 -15    5.33    1.03
  -3   1  15    6.18    1.29
   3   1 -15    6.38    1.32
  -1  -1  15    6.12    1.27
   1  -1 -15    6.40    1.20
  -1   1  15    5.32    1.29
   1   1 -15    4.31    1.16
  -1  -1 -15    6.35    1.34
   1  -1  15    8.34    1.31
   1   1  15    8.49    1.39
  -1   1 -15    6.64    1.54
  10  -2 -15   14.26    1.56
  10  -2 -15   14.22    1.75
 -10  -2  15   16.27    1.79
  10   2 -15   18.12    1.78
 -10   2  15   17.53    1.73
   8  -2 -15   21.21    1.64
  -8  -2  15   21.82    1.91
   8  -2 -15   19.80    1.77
  -8   2  15   23.59    1.89
   8   2 -15   21.81    1.86
   6  -2 -15    5.18    1.04
  -6  -2  15    4.98    1.19
   6   2 -15    2.82    1.12
  -6   2  15    2.40    0.96
   4  -2 -15    5.49    1.03
   4  -2 -15    1.81    1.03
  -4  -2  15    1.31    0.93
  -4   2  15    3.88    1.03
   4   2 -15    4.97    1.27
  -2  -2  15   28.29    2.03
   2  -2 -15   27.81    2.01
   2  -2 -15   26.41    1.80
   2   2 -15   29.67    2.12
  -2   2  15   25.23    1.92
   0  -2 -15   19.93    2.20
   0  -2 -15   17.47    1.85
   0  -2  15   16.49    1.77
   0   2 -15   17.33    1.95
   0   2  15   18.37    1.68
   9  -3 -15    6.39    1.14
  -9  -3  15    2.46    1.20
   9  -3 -15    2.71    1.43
   9   3 -15    5.51    1.40
  -9   3  15    5.26    1.05
  -7  -3  15   23.12    1.94
   7  -3 -15   26.16    2.08
   7  -3 -15   27.32    1.67
   7   3 -15   29.74    2.18
  -7   3  15   27.79    2.02
   5  -3 -15   19.82    1.45
  -5  -3  15   16.60    1.79
   5  -3 -15   16.20    1.76
  -5   3  15   21.11    1.81
   5   3 -15   16.95    1.85
   3  -3 -15   10.79    1.36
   3  -3 -15   12.75    1.66
  -3  -3  15   10.87    1.77
  -3   3  15   12.63    1.79
   3   3 -15    9.25    1.56
   1  -3 -15    3.14    0.96
   1  -3 -15    2.75    1.35
  -1  -3  15    1.94    1.16
   1   3 -15    1.43    1.06
  -1   3  15    2.99    1.07
  -6  -4  15   19.97    1.93
   6  -4 -15   23.21    2.24
  -6   4  15   22.74    2.03
   6   4 -15   20.57    2.14
  -4  -4  15   19.45    1.86
   4  -4 -15   20.86    2.21
  -4   4  15   19.28    1.80
   4   4 -15   19.89    2.07
 -10   0  16   20.31    1.77
  10   0 -16   21.08    1.81
  -8   0  16    5.74    1.15
  -6   0  16   50.08    2.68
   6   0 -16   48.97    2.60
  -4   0  16   19.68    1.76
   4   0 -16   18.79    1.73
  -2   0  16    3.66    0.99
   2   0 -16    2.62    1.05
   9  -1 -16   29.05    2.04
  -9  -1  16   32.98    2.23
  -9   1  16   25.62    2.06
   9   1 -16   30.91    2.30
   7  -1 -16   23.04    1.91
  -7  -1  16   25.25    2.08
   7   1 -16   23.80    2.10
  -7   1  16   23.12    2.00
   5  -1 -16   27.41    1.96
  -5  -1  16   29.33    2.14
   5   1 -16   27.71    2.19
  -5   1  16   28.16    2.07
   3  -1 -16   38.13    2.64
  -3  -1  16   37.14    2.33
  -3   1  16   34.13    2.18
   3   1 -16   36.47    2.37
   8  -2 -16   31.12    2.08
  -8  -2  16   39.27    2.40
  -8   2  16   38.16    2.35
   8   2 -16   37.81    2.45
   6  -2 -16   35.00    2.05
  -6  -2  16   33.58    2.25
  -6   2  16   38.79    2.36
   6   2 -16   34.66    2.33
   4  -2 -16   35.29    2.12
  -4  -2  16   39.39    2.41
   4   2 -16   38.00    2.44
  -4   2  16   38.22    2.39
   2   2 -16    1.75    1.14
   5  -3 -16   13.72    1.92
  -6   0  17    0.98    0.99
   6   0 -17   -0.02    0.99
   0   0   0    0.00    0.00
;
_shelx_hkl_checksum   53211
