# Supplementary material
Source: MDPI journal article supplement (https://www.mdpi.com/2073-4352/12/9/1251)
Supplement: s1 [file s1 › Compound 5.cif]

 
data_siv71
 
_audit_creation_method            SHELXL-2014/6
_chemical_name_systematic         ?
_chemical_name_common             ?
_chemical_melting_point           ?
_chemical_formula_moiety          
 '(C4 H18 B18 Cl4 Co) -,Cs +, 2(C3 H6 O)' 
_chemical_formula_sum
 'C10 H30 B18 Cl4 Co Cs O2' 
_chemical_formula_weight          710.56

loop_
 _atom_type_symbol
 _atom_type_description
 _atom_type_scat_dispersion_real
 _atom_type_scat_dispersion_imag
 _atom_type_scat_source
 'C'  'C'   0.0033   0.0016
 'International Tables Vol C Tables 4.2.6.8 and 6.1.1.4'
 'H'  'H'   0.0000   0.0000
 'International Tables Vol C Tables 4.2.6.8 and 6.1.1.4'
 'B'  'B'   0.0013   0.0007
 'International Tables Vol C Tables 4.2.6.8 and 6.1.1.4'
 'Cl'  'Cl'   0.1484   0.1585
 'International Tables Vol C Tables 4.2.6.8 and 6.1.1.4'
 'Co'  'Co'   0.3494   0.9721
 'International Tables Vol C Tables 4.2.6.8 and 6.1.1.4'
 'Cs'  'Cs'  -0.3680   2.1192
 'International Tables Vol C Tables 4.2.6.8 and 6.1.1.4'
 'O'  'O'   0.0106   0.0060
 'International Tables Vol C Tables 4.2.6.8 and 6.1.1.4'
 
_space_group_crystal_system       tetragonal
_space_group_IT_number            92
_space_group_name_H-M_alt         'P 41 21 2'
_space_group_name_Hall            'P 4abw 2nw'
 
_shelx_space_group_comment
;
The symmetry employed for this shelxl refinement is uniquely defined
by the following loop, which should always be used as a source of
symmetry information in preference to the above space-group names.
They are only intended as comments.
;
 
loop_
 _space_group_symop_operation_xyz
 'x, y, z'
 '-x, -y, z+1/2'
 '-y+1/2, x+1/2, z+1/4'
 'y+1/2, -x+1/2, z+3/4'
 '-x+1/2, y+1/2, -z+1/4'
 'x+1/2, -y+1/2, -z+3/4'
 'y, x, -z'
 '-y, -x, -z+1/2'
 
_cell_length_a                    15.1995(3)
_cell_length_b                    15.1995(3)
_cell_length_c                    24.6019(7)
_cell_angle_alpha                 90
_cell_angle_beta                  90
_cell_angle_gamma                 90
_cell_volume                      5683.6(3)
_cell_formula_units_Z             8
_cell_measurement_temperature     120(2)
_cell_measurement_reflns_used     9780
_cell_measurement_theta_min       2.52
_cell_measurement_theta_max       26.78
 
_exptl_crystal_description        prizm
_exptl_crystal_colour             'orange'
_exptl_crystal_density_meas       ?
_exptl_crystal_density_method     ?
_exptl_crystal_density_diffrn     1.661          
_exptl_crystal_F_000              2768
_exptl_transmission_factor_min    ?
_exptl_transmission_factor_max    ?
_exptl_crystal_size_max           0.012
_exptl_crystal_size_mid           0.008
_exptl_crystal_size_min           0.006
_exptl_absorpt_coefficient_mu     2.255
_shelx_estimated_absorpt_T_min    ?
_shelx_estimated_absorpt_T_max    ?
_exptl_absorpt_correction_type    'multi-scan'
_exptl_absorpt_correction_T_min   0.938
_exptl_absorpt_correction_T_max   0.987
_exptl_absorpt_process_details    'SADABS-2014/5 (Bruker,2014/5)' 
_exptl_absorpt_special_details    ?
_diffrn_ambient_temperature       120(2)
_diffrn_radiation_wavelength      0.71073
_diffrn_radiation_type            MoK\a
_diffrn_source                    'sealed tube'
_diffrn_measurement_device_type   'Bruker APEX-II CCD' 
_diffrn_measurement_method        '\f and \w scans' 
_diffrn_detector_area_resol_mean  ?
_diffrn_reflns_number             74784
_diffrn_reflns_av_unetI/netI      0.0188
_diffrn_reflns_av_R_equivalents   0.0376
_diffrn_reflns_limit_h_min        -19
_diffrn_reflns_limit_h_max        19
_diffrn_reflns_limit_k_min        -19
_diffrn_reflns_limit_k_max        19
_diffrn_reflns_limit_l_min        -31
_diffrn_reflns_limit_l_max        31
_diffrn_reflns_theta_min          1.895
_diffrn_reflns_theta_max          26.777
_diffrn_reflns_theta_full         25.242
_diffrn_measured_fraction_theta_max   0.997
_diffrn_measured_fraction_theta_full  0.996
_diffrn_reflns_Laue_measured_fraction_max    0.997
_diffrn_reflns_Laue_measured_fraction_full   0.996
_diffrn_reflns_point_group_measured_fraction_max   0.998
_diffrn_reflns_point_group_measured_fraction_full  0.998
_reflns_number_total              6074
_reflns_number_gt                 5678
_reflns_threshold_expression      'I > 2\s(I)'
_reflns_Friedel_coverage          0.739
_reflns_Friedel_fraction_max      1.000
_reflns_Friedel_fraction_full     1.000
 
_reflns_special_details
;
 Reflections were merged by SHELXL according to the crystal
 class for the calculation of statistics and refinement.
 
 _reflns_Friedel_fraction is defined as the number of unique
 Friedel pairs measured divided by the number that would be
 possible theoretically, ignoring centric projections and
 systematic absences.
;
 
_computing_data_collection        'APEX (Bruker, 2014)' 
_computing_cell_refinement        'SAINT (Bruker, 2014)' 
_computing_data_reduction         'SAINT (Bruker, 2014)'
_computing_structure_solution   'SHELXL-2014/6 (Sheldrick, 2014)'
_computing_structure_refinement 'SHELXL-2014/6 (Sheldrick, 2014)'
_computing_molecular_graphics   'SHELXL-2014/6 (Sheldrick, 2014)'
_computing_publication_material   
'SHELXL-2014/6 (Sheldrick, 2014) and PLATON (Spek, 2009)'
_refine_special_details           ?
_refine_ls_structure_factor_coef  Fsqd
_refine_ls_matrix_type            full
_refine_ls_weighting_scheme       calc
_refine_ls_weighting_details
'w=1/[\s^2^(Fo^2^)+(0.0288P)^2^+13.5863P] where P=(Fo^2^+2Fc^2^)/3'
_atom_sites_solution_primary      direct
_atom_sites_solution_secondary    difmap
_atom_sites_solution_hydrogens    mixed
_refine_ls_hydrogen_treatment     constr
_refine_ls_extinction_method      none
_refine_ls_extinction_coef        .
_refine_ls_abs_structure_details
;
 Flack x determined using 2331 quotients [(I+)-(I-)]/[(I+)+(I-)]
 (Parsons, Flack and Wagner, Acta Cryst. B69 (2013) 249-259).
;
_refine_ls_abs_structure_Flack    0.013(5)
_chemical_absolute_configuration  'ad'
_refine_ls_number_reflns          6074
_refine_ls_number_parameters      330
_refine_ls_number_restraints      0
_refine_ls_R_factor_all           0.0339
_refine_ls_R_factor_gt            0.0311
_refine_ls_wR_factor_ref          0.0772
_refine_ls_wR_factor_gt           0.0757
_refine_ls_goodness_of_fit_ref    1.051
_refine_ls_restrained_S_all       1.051
_refine_ls_shift/su_max           0.001
_refine_ls_shift/su_mean          0.000
 
loop_
 _atom_site_label
 _atom_site_type_symbol
 _atom_site_fract_x
 _atom_site_fract_y
 _atom_site_fract_z
 _atom_site_U_iso_or_equiv
 _atom_site_adp_type
 _atom_site_occupancy
 _atom_site_site_symmetry_order  
 _atom_site_calc_flag
 _atom_site_refinement_flags_posn
 _atom_site_refinement_flags_adp
 _atom_site_refinement_flags_occupancy
 _atom_site_disorder_assembly
 _atom_site_disorder_group
Co1 Co 1.00167(4) 0.49346(4) 0.28492(2) 0.01209(13) Uani 1 1 d . . . . .
Cl1 Cl 0.75216(9) 0.47682(9) 0.40816(5) 0.0282(3) Uani 1 1 d . . . . .
Cl2 Cl 0.82266(8) 0.25693(8) 0.36069(5) 0.0225(3) Uani 1 1 d . . . . .
C1 C 0.8839(3) 0.5310(3) 0.2532(2) 0.0148(9) Uani 1 1 d . . . . .
H1 H 0.8963 0.5894 0.2287 0.018 Uiso 1 1 d R U . . .
C2 C 0.9141(3) 0.4346(3) 0.23263(18) 0.0150(9) Uani 1 1 d . . . . .
H2 H 0.9476 0.4255 0.1939 0.018 Uiso 1 1 d R U . . .
B4 B 0.8889(4) 0.5407(4) 0.3224(2) 0.0172(11) Uani 1 1 d . . . . .
H4 H 0.9020 0.6025 0.3459 0.021 Uiso 1 1 calc R U . . .
B5 B 0.7866(4) 0.5264(4) 0.2864(2) 0.0200(12) Uani 1 1 d . . . . .
H5 H 0.7357 0.5796 0.2861 0.024 Uiso 1 1 calc R U . . .
B6 B 0.8039(4) 0.4610(4) 0.2282(2) 0.0181(11) Uani 1 1 d . . . . .
H6 H 0.7657 0.4706 0.1898 0.022 Uiso 1 1 calc R U . . .
B7 B 0.9434(3) 0.3687(4) 0.2851(2) 0.0135(10) Uani 1 1 d . . . . .
H7 H 0.9938 0.3151 0.2835 0.016 Uiso 1 1 calc R U . . .
B8 B 0.9246(4) 0.4334(4) 0.3450(2) 0.0162(11) Uani 1 1 d . . . . .
H8 H 0.9608 0.4226 0.3841 0.019 Uiso 1 1 calc R U . . .
B9 B 0.8104(4) 0.4614(4) 0.3446(2) 0.0176(11) Uani 1 1 d . . . . .
B10 B 0.7577(3) 0.4132(4) 0.2873(2) 0.0178(11) Uani 1 1 d . . . . .
H10 H 0.6876 0.3905 0.2888 0.021 Uiso 1 1 calc R U . . .
B11 B 0.8404(3) 0.3562(4) 0.2497(2) 0.0171(10) Uani 1 1 d . . . . .
H11 H 0.8254 0.2961 0.2250 0.020 Uiso 1 1 calc R U . . .
B12 B 0.8440(4) 0.3555(4) 0.3219(2) 0.0163(11) Uani 1 1 d . . . . .
Cl1' Cl 1.25467(8) 0.51309(9) 0.40463(5) 0.0242(3) Uani 1 1 d . . . . .
Cl2' Cl 1.17915(8) 0.73313(8) 0.35664(5) 0.0215(3) Uani 1 1 d . . . . .
C1' C 1.1188(3) 0.4562(3) 0.2517(2) 0.0142(9) Uani 1 1 d . . . . .
H1' H 1.1062 0.3972 0.2278 0.017 Uiso 1 1 d R U . . .
C2' C 1.0871(3) 0.5519(3) 0.23087(18) 0.0155(9) Uani 1 1 d . . . . .
H2' H 1.0523 0.5597 0.1924 0.019 Uiso 1 1 d R U . . .
B4' B 1.1162(3) 0.4471(4) 0.3209(2) 0.0151(10) Uani 1 1 d . . . . .
H4' H 1.1045 0.3854 0.3447 0.018 Uiso 1 1 calc R U . . .
B5' B 1.2176(4) 0.4623(4) 0.2837(2) 0.0187(11) Uani 1 1 d . . . . .
H5' H 1.2692 0.4098 0.2830 0.022 Uiso 1 1 calc R U . . .
B6' B 1.1972(4) 0.5274(4) 0.2253(2) 0.0175(11) Uani 1 1 d . . . . .
H6' H 1.2341 0.5181 0.1863 0.021 Uiso 1 1 calc R U . . .
B7' B 1.0590(3) 0.6184(4) 0.2831(2) 0.0142(10) Uani 1 1 d . . . . .
H7' H 1.0080 0.6715 0.2817 0.017 Uiso 1 1 calc R U . . .
B8' B 1.0806(3) 0.5545(4) 0.3435(2) 0.0146(10) Uani 1 1 d . . . . .
H8' H 1.0459 0.5655 0.3830 0.018 Uiso 1 1 calc R U . . .
B9' B 1.1948(4) 0.5275(4) 0.3419(2) 0.0158(11) Uani 1 1 d . . . . .
B10' B 1.2450(4) 0.5755(4) 0.2836(2) 0.0179(11) Uani 1 1 d . . . . .
H10' H 1.3150 0.5986 0.2841 0.021 Uiso 1 1 calc R U . . .
B11' B 1.1609(3) 0.6317(4) 0.2468(2) 0.0168(11) Uani 1 1 d . . . . .
H11' H 1.1748 0.6918 0.2219 0.020 Uiso 1 1 calc R U . . .
B12' B 1.1593(3) 0.6325(4) 0.3188(2) 0.0153(11) Uani 1 1 d . . . . .
Cs1 Cs 0.60705(2) 0.60705(2) 0.5000 0.02476(12) Uani 1 2 d S T P . .
Cs2 Cs 0.40040(2) 0.40040(2) 0.5000 0.02720(13) Uani 1 2 d S T P . .
O1S O 0.6016(3) 0.4028(3) 0.50109(19) 0.0416(10) Uani 1 1 d . . . . .
O2S O 0.5065(3) 0.5042(3) 0.40912(16) 0.0386(9) Uani 1 1 d . . . . .
C1S C 0.6608(5) 0.3618(6) 0.5238(3) 0.057(2) Uani 1 1 d . . . . .
C2S C 0.6983(5) 0.3935(5) 0.5792(4) 0.063(2) Uani 1 1 d . . . . .
H2SA H 0.6739 0.3574 0.6086 0.094 Uiso 1 1 calc R U . . .
H2SB H 0.6821 0.4552 0.5850 0.094 Uiso 1 1 calc R U . . .
H2SC H 0.7626 0.3880 0.5790 0.094 Uiso 1 1 calc R U . . .
C3S C 0.7014(5) 0.2852(5) 0.5003(3) 0.0556(19) Uani 1 1 d . . . . .
H3SA H 0.7022 0.2374 0.5271 0.083 Uiso 1 1 calc R U . . .
H3SB H 0.7619 0.2993 0.4895 0.083 Uiso 1 1 calc R U . . .
H3SC H 0.6679 0.2666 0.4683 0.083 Uiso 1 1 calc R U . . .
C4S C 0.5066(3) 0.4989(3) 0.3599(2) 0.0291(11) Uani 1 1 d . . . . .
C5S C 0.5398(5) 0.5725(4) 0.3247(3) 0.0437(16) Uani 1 1 d . . . . .
H5SA H 0.5655 0.6185 0.3477 0.066 Uiso 1 1 calc R U . . .
H5SB H 0.4908 0.5972 0.3038 0.066 Uiso 1 1 calc R U . . .
H5SC H 0.5847 0.5499 0.2998 0.066 Uiso 1 1 calc R U . . .
C6S C 0.4723(5) 0.4199(5) 0.3307(3) 0.052(2) Uani 1 1 d . . . . .
H6SA H 0.4570 0.3741 0.3572 0.078 Uiso 1 1 calc R U . . .
H6SB H 0.5175 0.3975 0.3059 0.078 Uiso 1 1 calc R U . . .
H6SC H 0.4198 0.4361 0.3099 0.078 Uiso 1 1 calc R U . . .
 
loop_
 _atom_site_aniso_label
 _atom_site_aniso_U_11
 _atom_site_aniso_U_22
 _atom_site_aniso_U_33
 _atom_site_aniso_U_23
 _atom_site_aniso_U_13
 _atom_site_aniso_U_12
Co1 0.0107(3) 0.0180(3) 0.0075(3) 0.0006(2) 0.0003(2) -0.0023(2)
Cl1 0.0274(7) 0.0364(7) 0.0206(6) -0.0111(5) 0.0137(5) -0.0098(5)
Cl2 0.0241(6) 0.0246(6) 0.0187(6) 0.0022(5) 0.0002(5) -0.0084(5)
C1 0.012(2) 0.018(2) 0.014(2) -0.0024(19) 0.001(2) -0.0013(17)
C2 0.015(2) 0.020(2) 0.010(2) -0.0013(17) -0.0020(17) -0.0004(18)
B4 0.018(3) 0.023(3) 0.011(2) -0.004(2) 0.000(2) -0.002(2)
B5 0.012(3) 0.025(3) 0.023(3) -0.001(2) 0.001(2) -0.002(2)
B6 0.011(3) 0.025(3) 0.018(3) -0.001(2) -0.004(2) 0.000(2)
B7 0.016(2) 0.017(3) 0.007(2) -0.001(2) -0.0013(19) -0.0035(19)
B8 0.014(2) 0.024(3) 0.010(2) -0.002(2) 0.001(2) -0.007(2)
B9 0.014(3) 0.024(3) 0.014(3) -0.004(2) 0.005(2) -0.009(2)
B10 0.009(2) 0.025(3) 0.019(3) -0.004(2) 0.000(2) -0.004(2)
B11 0.015(2) 0.023(3) 0.013(2) -0.003(2) -0.003(2) -0.003(2)
B12 0.017(3) 0.021(3) 0.011(2) -0.001(2) -0.001(2) -0.005(2)
Cl1' 0.0265(6) 0.0263(6) 0.0197(6) 0.0085(5) -0.0119(5) -0.0086(5)
Cl2' 0.0249(6) 0.0201(6) 0.0196(6) -0.0001(5) 0.0001(5) -0.0069(5)
C1' 0.010(2) 0.020(2) 0.013(2) -0.002(2) 0.0019(19) 0.0000(17)
C2' 0.017(2) 0.021(2) 0.009(2) 0.0026(17) 0.0027(18) -0.0010(19)
B4' 0.014(3) 0.019(3) 0.013(2) 0.003(2) -0.003(2) -0.005(2)
B5' 0.014(3) 0.023(3) 0.019(3) 0.003(2) -0.001(2) -0.001(2)
B6' 0.013(3) 0.021(3) 0.018(3) -0.001(2) 0.005(2) 0.002(2)
B7' 0.014(2) 0.018(3) 0.011(2) 0.002(2) 0.0014(19) -0.0008(19)
B8' 0.014(2) 0.021(3) 0.009(2) 0.001(2) -0.003(2) -0.005(2)
B9' 0.015(2) 0.021(3) 0.012(2) 0.004(2) -0.004(2) -0.006(2)
B10' 0.013(3) 0.023(3) 0.018(3) 0.007(2) 0.001(2) -0.002(2)
B11' 0.017(2) 0.020(3) 0.013(2) 0.003(2) 0.001(2) -0.002(2)
B12' 0.015(3) 0.019(3) 0.012(2) 0.003(2) 0.003(2) -0.005(2)
Cs1 0.02415(16) 0.02415(16) 0.0260(2) -0.00504(15) 0.00504(15) -0.00849(18)
Cs2 0.02701(17) 0.02701(17) 0.0276(2) 0.00943(15) -0.00943(15) -0.0045(2)
O1S 0.029(2) 0.041(2) 0.055(3) 0.017(2) 0.007(2) 0.0015(19)
O2S 0.041(3) 0.046(3) 0.029(2) 0.0012(18) -0.0011(18) -0.0011(19)
C1S 0.040(4) 0.063(5) 0.066(5) 0.027(4) 0.007(4) -0.012(3)
C2S 0.048(4) 0.055(5) 0.086(6) 0.024(5) -0.024(4) -0.018(4)
C3S 0.053(4) 0.058(5) 0.056(4) 0.013(4) 0.018(4) 0.014(3)
C4S 0.023(3) 0.032(3) 0.033(3) -0.002(2) -0.002(2) 0.000(2)
C5S 0.047(4) 0.039(4) 0.045(4) 0.009(3) -0.005(3) -0.009(3)
C6S 0.064(5) 0.039(4) 0.053(5) -0.016(3) 0.016(4) -0.016(3)
 
_geom_special_details
;
 All esds (except the esd in the dihedral angle between two l.s. planes)
 are estimated using the full covariance matrix.  The cell esds are taken
 into account individually in the estimation of esds in distances, angles
 and torsion angles; correlations between esds in cell parameters are only
 used when they are defined by crystal symmetry.  An approximate (isotropic)
 treatment of cell esds is used for estimating esds involving l.s. planes.
;
 
loop_
 _geom_bond_atom_site_label_1
 _geom_bond_atom_site_label_2
 _geom_bond_distance
 _geom_bond_site_symmetry_2
 _geom_bond_publ_flag
Co1 C1 2.034(4) . ?
Co1 C1' 2.038(4) . ?
Co1 C2 2.055(5) . ?
Co1 C2' 2.060(5) . ?
Co1 B4 2.074(6) . ?
Co1 B4' 2.077(5) . ?
Co1 B7' 2.090(5) . ?
Co1 B8' 2.092(5) . ?
Co1 B7 2.093(5) . ?
Co1 B8 2.096(5) . ?
Cl1 B9 1.812(6) . ?
Cl1 Cs1 3.7267(13) . ?
Cl2 B12 1.806(6) . ?
Cl2 Cs2 3.8119(13) 4_554 ?
C1 C2 1.616(6) . ?
C1 B5 1.690(7) . ?
C1 B4 1.710(7) . ?
C1 B6 1.730(7) . ?
C1 H1 1.0899 . ?
C2 B11 1.689(7) . ?
C2 B7 1.693(7) . ?
C2 B6 1.726(7) . ?
C2 H2 1.0901 . ?
B4 B9 1.783(8) . ?
B4 B5 1.803(8) . ?
B4 B8 1.807(8) . ?
B4 H4 1.1200 . ?
B5 B6 1.762(8) . ?
B5 B10 1.776(8) . ?
B5 B9 1.777(8) . ?
B5 H5 1.1200 . ?
B6 B11 1.767(8) . ?
B6 B10 1.771(8) . ?
B6 H6 1.1200 . ?
B7 B12 1.772(7) . ?
B7 B8 1.796(7) . ?
B7 B11 1.802(7) . ?
B7 H7 1.1200 . ?
B8 B9 1.787(8) . ?
B8 B12 1.796(7) . ?
B8 H8 1.1200 . ?
B9 B12 1.778(8) . ?
B9 B10 1.779(8) . ?
B10 B11 1.785(8) . ?
B10 B12 1.793(8) . ?
B10 H10 1.1200 . ?
B11 B12 1.779(8) . ?
B11 H11 1.1200 . ?
Cl1' B9' 1.806(5) . ?
Cl1' Cs2 3.6531(12) 1_655 ?
Cl2' B12' 1.815(6) . ?
Cl2' Cs1 3.7396(13) 4_564 ?
C1' C2' 1.615(6) . ?
C1' B5' 1.698(7) . ?
C1' B4' 1.708(7) . ?
C1' B6' 1.737(7) . ?
C1' H1' 1.0900 . ?
C2' B7' 1.690(7) . ?
C2' B11' 1.698(7) . ?
C2' B6' 1.720(7) . ?
C2' H2' 1.0901 . ?
B4' B9' 1.785(7) . ?
B4' B8' 1.807(8) . ?
B4' B5' 1.808(8) . ?
B4' H4' 1.1200 . ?
B5' B10' 1.770(8) . ?
B5' B6' 1.771(8) . ?
B5' B9' 1.775(8) . ?
B5' H5' 1.1200 . ?
B6' B11' 1.759(8) . ?
B6' B10' 1.767(8) . ?
B6' H6' 1.1200 . ?
B7' B12' 1.772(7) . ?
B7' B11' 1.800(7) . ?
B7' B8' 1.804(7) . ?
B7' H7' 1.1200 . ?
B8' B9' 1.783(8) . ?
B8' B12' 1.791(7) . ?
B8' H8' 1.1200 . ?
B9' B12' 1.777(8) . ?
B9' B10' 1.779(7) . ?
B10' B11' 1.784(8) . ?
B10' B12' 1.788(8) . ?
B10' H10' 1.1200 . ?
B11' B12' 1.773(8) . ?
B11' H11' 1.1200 . ?
Cs1 O1S 3.106(4) . ?
Cs1 O1S 3.106(4) 7_556 ?
Cs1 O2S 3.127(4) . ?
Cs1 O2S 3.127(4) 7_556 ?
Cs1 Cl1 3.7267(13) 7_556 ?
Cs1 Cl2' 3.7397(13) 3_645 ?
Cs1 Cl2' 3.7397(13) 6_465 ?
Cs1 C1S 3.861(8) . ?
Cs1 C1S 3.861(8) 7_556 ?
Cs1 Cs2 4.4421(6) . ?
Cs2 O1S 3.058(4) . ?
Cs2 O1S 3.058(4) 7_556 ?
Cs2 O2S 3.177(4) . ?
Cs2 O2S 3.177(4) 7_556 ?
Cs2 Cl1' 3.6532(12) 1_455 ?
Cs2 Cl1' 3.6532(12) 7_546 ?
Cs2 Cl2 3.8118(13) 6_455 ?
Cs2 Cl2 3.8118(13) 3_545 ?
O1S C1S 1.230(9) . ?
O2S C4S 1.213(7) . ?
C1S C3S 1.440(11) . ?
C1S C2S 1.554(12) . ?
C2S H2SA 0.9800 . ?
C2S H2SB 0.9800 . ?
C2S H2SC 0.9800 . ?
C3S H3SA 0.9800 . ?
C3S H3SB 0.9800 . ?
C3S H3SC 0.9800 . ?
C4S C6S 1.494(8) . ?
C4S C5S 1.502(8) . ?
C5S H5SA 0.9800 . ?
C5S H5SB 0.9800 . ?
C5S H5SC 0.9800 . ?
C6S H6SA 0.9800 . ?
C6S H6SB 0.9800 . ?
C6S H6SC 0.9800 . ?
 
loop_
 _geom_angle_atom_site_label_1
 _geom_angle_atom_site_label_2
 _geom_angle_atom_site_label_3
 _geom_angle
 _geom_angle_site_symmetry_1
 _geom_angle_site_symmetry_3
 _geom_angle_publ_flag
C1 Co1 C1' 133.9(2) . . ?
C1 Co1 C2 46.55(18) . . ?
C1' Co1 C2 101.19(19) . . ?
C1 Co1 C2' 100.7(2) . . ?
C1' Co1 C2' 46.43(18) . . ?
C2 Co1 C2' 101.05(19) . . ?
C1 Co1 B4 49.2(2) . . ?
C1' Co1 B4 174.6(2) . . ?
C2 Co1 B4 83.9(2) . . ?
C2' Co1 B4 131.2(2) . . ?
C1 Co1 B4' 175.2(2) . . ?
C1' Co1 B4' 49.0(2) . . ?
C2 Co1 B4' 131.5(2) . . ?
C2' Co1 B4' 83.9(2) . . ?
B4 Co1 B4' 128.4(2) . . ?
C1 Co1 B7' 96.0(2) . . ?
C1' Co1 B7' 83.1(2) . . ?
C2 Co1 B7' 130.71(19) . . ?
C2' Co1 B7' 48.07(19) . . ?
B4 Co1 B7' 92.2(2) . . ?
B4' Co1 B7' 88.1(2) . . ?
C1 Co1 B8' 130.1(2) . . ?
C1' Co1 B8' 84.1(2) . . ?
C2 Co1 B8' 174.4(2) . . ?
C2' Co1 B8' 83.78(19) . . ?
B4 Co1 B8' 90.8(2) . . ?
B4' Co1 B8' 51.4(2) . . ?
B7' Co1 B8' 51.1(2) . . ?
C1 Co1 B7 83.2(2) . . ?
C1' Co1 B7 96.8(2) . . ?
C2 Co1 B7 48.16(19) . . ?
C2' Co1 B7 131.20(19) . . ?
B4 Co1 B7 87.9(2) . . ?
B4' Co1 B7 92.7(2) . . ?
B7' Co1 B7 178.8(2) . . ?
B8' Co1 B7 130.0(2) . . ?
C1 Co1 B8 84.3(2) . . ?
C1' Co1 B8 130.5(2) . . ?
C2 Co1 B8 83.70(19) . . ?
C2' Co1 B8 174.6(2) . . ?
B4 Co1 B8 51.3(2) . . ?
B4' Co1 B8 91.1(2) . . ?
B7' Co1 B8 130.1(2) . . ?
B8' Co1 B8 91.6(2) . . ?
B7 Co1 B8 50.8(2) . . ?
B9 Cl1 Cs1 151.8(2) . . ?
B12 Cl2 Cs2 95.01(18) . 4_554 ?
C2 C1 B5 111.2(4) . . ?
C2 C1 B4 112.2(4) . . ?
B5 C1 B4 64.0(3) . . ?
C2 C1 B6 62.0(3) . . ?
B5 C1 B6 62.0(3) . . ?
B4 C1 B6 116.0(4) . . ?
C2 C1 Co1 67.4(2) . . ?
B5 C1 Co1 125.0(3) . . ?
B4 C1 Co1 66.7(2) . . ?
B6 C1 Co1 125.7(3) . . ?
C2 C1 H1 121.1 . . ?
B5 C1 H1 116.8 . . ?
B4 C1 H1 118.2 . . ?
B6 C1 H1 115.2 . . ?
Co1 C1 H1 106.8 . . ?
C1 C2 B11 111.9(4) . . ?
C1 C2 B7 111.8(4) . . ?
B11 C2 B7 64.4(3) . . ?
C1 C2 B6 62.2(3) . . ?
B11 C2 B6 62.3(3) . . ?
B7 C2 B6 116.1(4) . . ?
C1 C2 Co1 66.0(2) . . ?
B11 C2 Co1 125.6(3) . . ?
B7 C2 Co1 67.1(2) . . ?
B6 C2 Co1 124.5(3) . . ?
C1 C2 H2 121.5 . . ?
B11 C2 H2 115.9 . . ?
B7 C2 H2 117.9 . . ?
B6 C2 H2 115.4 . . ?
Co1 C2 H2 107.5 . . ?
C1 B4 B9 102.5(4) . . ?
C1 B4 B5 57.5(3) . . ?
B9 B4 B5 59.4(3) . . ?
C1 B4 B8 104.0(4) . . ?
B9 B4 B8 59.7(3) . . ?
B5 B4 B8 107.5(4) . . ?
C1 B4 Co1 64.2(2) . . ?
B9 B4 Co1 117.1(3) . . ?
B5 B4 Co1 116.9(3) . . ?
B8 B4 Co1 64.9(2) . . ?
C1 B4 H4 126.5 . . ?
B9 B4 H4 121.8 . . ?
B5 B4 H4 120.5 . . ?
B8 B4 H4 123.0 . . ?
Co1 B4 H4 111.9 . . ?
C1 B5 B6 60.1(3) . . ?
C1 B5 B10 105.2(4) . . ?
B6 B5 B10 60.1(3) . . ?
C1 B5 B9 103.5(4) . . ?
B6 B5 B9 108.1(4) . . ?
B10 B5 B9 60.1(3) . . ?
C1 B5 B4 58.5(3) . . ?
B6 B5 B4 109.8(4) . . ?
B10 B5 B4 108.9(4) . . ?
B9 B5 B4 59.7(3) . . ?
C1 B5 H5 124.9 . . ?
B6 B5 H5 120.4 . . ?
B10 B5 H5 122.0 . . ?
B9 B5 H5 123.2 . . ?
B4 B5 H5 120.8 . . ?
C2 B6 C1 55.8(3) . . ?
C2 B6 B5 102.9(4) . . ?
C1 B6 B5 57.9(3) . . ?
C2 B6 B11 57.8(3) . . ?
C1 B6 B11 103.1(4) . . ?
B5 B6 B11 108.2(4) . . ?
C2 B6 B10 103.8(4) . . ?
C1 B6 B10 103.8(4) . . ?
B5 B6 B10 60.4(3) . . ?
B11 B6 B10 60.6(3) . . ?
C2 B6 H6 125.9 . . ?
C1 B6 H6 125.8 . . ?
B5 B6 H6 122.4 . . ?
B11 B6 H6 122.2 . . ?
B10 B6 H6 122.8 . . ?
C2 B7 B12 103.5(4) . . ?
C2 B7 B8 105.1(4) . . ?
B12 B7 B8 60.4(3) . . ?
C2 B7 B11 57.7(3) . . ?
B12 B7 B11 59.7(3) . . ?
B8 B7 B11 108.5(4) . . ?
C2 B7 Co1 64.8(2) . . ?
B12 B7 Co1 117.6(3) . . ?
B8 B7 Co1 64.7(2) . . ?
B11 B7 Co1 117.6(3) . . ?
C2 B7 H7 125.8 . . ?
B12 B7 H7 121.2 . . ?
B8 B7 H7 122.4 . . ?
B11 B7 H7 120.1 . . ?
Co1 B7 H7 111.7 . . ?
B9 B8 B12 59.5(3) . . ?
B9 B8 B7 106.3(4) . . ?
B12 B8 B7 59.1(3) . . ?
B9 B8 B4 59.5(3) . . ?
B12 B8 B4 107.1(4) . . ?
B7 B8 B4 106.8(4) . . ?
B9 B8 Co1 115.8(3) . . ?
B12 B8 Co1 116.4(3) . . ?
B7 B8 Co1 64.5(2) . . ?
B4 B8 Co1 63.7(2) . . ?
B9 B8 H8 121.1 . . ?
B12 B8 H8 120.7 . . ?
B7 B8 H8 123.1 . . ?
B4 B8 H8 123.0 . . ?
Co1 B8 H8 113.3 . . ?
B5 B9 B12 108.0(4) . . ?
B5 B9 B10 59.9(3) . . ?
B12 B9 B10 60.5(3) . . ?
B5 B9 B4 60.8(3) . . ?
B12 B9 B4 108.9(4) . . ?
B10 B9 B4 109.7(4) . . ?
B5 B9 B8 109.5(4) . . ?
B12 B9 B8 60.5(3) . . ?
B10 B9 B8 110.1(4) . . ?
B4 B9 B8 60.8(3) . . ?
B5 B9 Cl1 121.6(4) . . ?
B12 B9 Cl1 121.9(4) . . ?
B10 B9 Cl1 121.1(3) . . ?
B4 B9 Cl1 120.3(4) . . ?
B8 B9 Cl1 120.0(4) . . ?
B6 B10 B5 59.6(3) . . ?
B6 B10 B9 107.7(4) . . ?
B5 B10 B9 60.0(3) . . ?
B6 B10 B11 59.6(3) . . ?
B5 B10 B11 106.8(4) . . ?
B9 B10 B11 107.1(4) . . ?
B6 B10 B12 107.5(4) . . ?
B5 B10 B12 107.4(4) . . ?
B9 B10 B12 59.7(3) . . ?
B11 B10 B12 59.6(3) . . ?
B6 B10 H10 122.0 . . ?
B5 B10 H10 122.2 . . ?
B9 B10 H10 121.9 . . ?
B11 B10 H10 122.5 . . ?
B12 B10 H10 122.0 . . ?
C2 B11 B6 59.9(3) . . ?
C2 B11 B12 103.3(4) . . ?
B6 B11 B12 108.3(4) . . ?
C2 B11 B10 104.7(4) . . ?
B6 B11 B10 59.8(3) . . ?
B12 B11 B10 60.4(3) . . ?
C2 B11 B7 57.9(3) . . ?
B6 B11 B7 108.8(4) . . ?
B12 B11 B7 59.3(3) . . ?
B10 B11 B7 108.0(4) . . ?
C2 B11 H11 125.2 . . ?
B6 B11 H11 120.6 . . ?
B12 B11 H11 122.9 . . ?
B10 B11 H11 122.3 . . ?
B7 B11 H11 121.6 . . ?
B7 B12 B9 107.7(4) . . ?
B7 B12 B11 61.0(3) . . ?
B9 B12 B11 107.4(4) . . ?
B7 B12 B10 109.0(4) . . ?
B9 B12 B10 59.7(3) . . ?
B11 B12 B10 60.0(3) . . ?
B7 B12 B8 60.5(3) . . ?
B9 B12 B8 60.0(3) . . ?
B11 B12 B8 109.5(4) . . ?
B10 B12 B8 109.1(4) . . ?
B7 B12 Cl2 121.2(4) . . ?
B9 B12 Cl2 122.2(3) . . ?
B11 B12 Cl2 121.8(4) . . ?
B10 B12 Cl2 121.6(3) . . ?
B8 B12 Cl2 120.2(4) . . ?
B9' Cl1' Cs2 155.76(19) . 1_655 ?
B12' Cl2' Cs1 97.98(18) . 4_564 ?
C2' C1' B5' 111.2(4) . . ?
C2' C1' B4' 112.5(4) . . ?
B5' C1' B4' 64.1(3) . . ?
C2' C1' B6' 61.6(3) . . ?
B5' C1' B6' 62.1(3) . . ?
B4' C1' B6' 116.1(4) . . ?
C2' C1' Co1 67.5(2) . . ?
B5' C1' Co1 124.9(3) . . ?
B4' C1' Co1 66.7(2) . . ?
B6' C1' Co1 125.2(3) . . ?
C2' C1' H1' 121.1 . . ?
B5' C1' H1' 116.8 . . ?
B4' C1' H1' 117.9 . . ?
B6' C1' H1' 115.5 . . ?
Co1 C1' H1' 107.0 . . ?
C1' C2' B7' 111.8(4) . . ?
C1' C2' B11' 111.9(4) . . ?
B7' C2' B11' 64.2(3) . . ?
C1' C2' B6' 62.7(3) . . ?
B7' C2' B6' 115.8(4) . . ?
B11' C2' B6' 61.9(3) . . ?
C1' C2' Co1 66.1(2) . . ?
B7' C2' Co1 66.9(2) . . ?
B11' C2' Co1 125.2(3) . . ?
B6' C2' Co1 124.9(3) . . ?
C1' C2' H2' 121.2 . . ?
B7' C2' H2' 118.2 . . ?
B11' C2' H2' 116.3 . . ?
B6' C2' H2' 115.2 . . ?
Co1 C2' H2' 107.5 . . ?
C1' B4' B9' 102.5(4) . . ?
C1' B4' B8' 103.8(4) . . ?
B9' B4' B8' 59.5(3) . . ?
C1' B4' B5' 57.7(3) . . ?
B9' B4' B5' 59.2(3) . . ?
B8' B4' B5' 107.1(4) . . ?
C1' B4' Co1 64.3(2) . . ?
B9' B4' Co1 116.8(3) . . ?
B8' B4' Co1 64.7(2) . . ?
B5' B4' Co1 117.1(3) . . ?
C1' B4' H4' 126.3 . . ?
B9' B4' H4' 122.0 . . ?
B8' B4' H4' 123.3 . . ?
B5' B4' H4' 120.5 . . ?
Co1 B4' H4' 112.0 . . ?
C1' B5' B10' 105.1(4) . . ?
C1' B5' B6' 60.0(3) . . ?
B10' B5' B6' 59.9(3) . . ?
C1' B5' B9' 103.4(4) . . ?
B10' B5' B9' 60.3(3) . . ?
B6' B5' B9' 108.0(4) . . ?
C1' B5' B4' 58.2(3) . . ?
B10' B5' B4' 109.0(4) . . ?
B6' B5' B4' 109.5(4) . . ?
B9' B5' B4' 59.8(3) . . ?
C1' B5' H5' 125.0 . . ?
B10' B5' H5' 121.9 . . ?
B6' B5' H5' 120.6 . . ?
B9' B5' H5' 123.1 . . ?
B4' B5' H5' 120.9 . . ?
C2' B6' C1' 55.7(3) . . ?
C2' B6' B11' 58.4(3) . . ?
C1' B6' B11' 103.5(4) . . ?
C2' B6' B10' 104.2(4) . . ?
C1' B6' B10' 103.6(4) . . ?
B11' B6' B10' 60.8(3) . . ?
C2' B6' B5' 103.1(4) . . ?
C1' B6' B5' 57.9(3) . . ?
B11' B6' B5' 108.3(4) . . ?
B10' B6' B5' 60.0(3) . . ?
C2' B6' H6' 125.6 . . ?
C1' B6' H6' 125.9 . . ?
B11' B6' H6' 121.8 . . ?
B10' B6' H6' 122.9 . . ?
B5' B6' H6' 122.5 . . ?
C2' B7' B12' 103.4(4) . . ?
C2' B7' B11' 58.1(3) . . ?
B12' B7' B11' 59.5(3) . . ?
C2' B7' B8' 105.0(4) . . ?
B12' B7' B8' 60.1(3) . . ?
B11' B7' B8' 108.2(4) . . ?
C2' B7' Co1 65.0(2) . . ?
B12' B7' Co1 117.3(3) . . ?
B11' B7' Co1 118.1(3) . . ?
B8' B7' Co1 64.5(2) . . ?
C2' B7' H7' 125.6 . . ?
B12' B7' H7' 121.6 . . ?
B11' B7' H7' 119.9 . . ?
B8' B7' H7' 122.7 . . ?
Co1 B7' H7' 111.6 . . ?
B9' B8' B12' 59.6(3) . . ?
B9' B8' B7' 106.4(4) . . ?
B12' B8' B7' 59.1(3) . . ?
B9' B8' B4' 59.6(3) . . ?
B12' B8' B4' 107.1(4) . . ?
B7' B8' B4' 106.8(4) . . ?
B9' B8' Co1 116.2(3) . . ?
B12' B8' Co1 116.3(3) . . ?
B7' B8' Co1 64.4(2) . . ?
B4' B8' Co1 63.9(2) . . ?
B9' B8' H8' 120.9 . . ?
B12' B8' H8' 120.7 . . ?
B7' B8' H8' 123.2 . . ?
B4' B8' H8' 122.9 . . ?
Co1 B8' H8' 113.2 . . ?
B5' B9' B12' 107.6(4) . . ?
B5' B9' B10' 59.7(3) . . ?
B12' B9' B10' 60.3(3) . . ?
B5' B9' B8' 109.6(4) . . ?
B12' B9' B8' 60.4(3) . . ?
B10' B9' B8' 109.9(4) . . ?
B5' B9' B4' 61.0(3) . . ?
B12' B9' B4' 108.7(4) . . ?
B10' B9' B4' 109.6(4) . . ?
B8' B9' B4' 60.9(3) . . ?
B5' B9' Cl1' 121.6(4) . . ?
B12' B9' Cl1' 122.3(4) . . ?
B10' B9' Cl1' 121.5(3) . . ?
B8' B9' Cl1' 119.9(4) . . ?
B4' B9' Cl1' 120.0(3) . . ?
B6' B10' B5' 60.1(3) . . ?
B6' B10' B9' 107.9(4) . . ?
B5' B10' B9' 60.0(3) . . ?
B6' B10' B11' 59.4(3) . . ?
B5' B10' B11' 107.3(4) . . ?
B9' B10' B11' 107.4(4) . . ?
B6' B10' B12' 107.1(4) . . ?
B5' B10' B12' 107.4(4) . . ?
B9' B10' B12' 59.8(3) . . ?
B11' B10' B12' 59.5(3) . . ?
B6' B10' H10' 122.0 . . ?
B5' B10' H10' 121.9 . . ?
B9' B10' H10' 121.8 . . ?
B11' B10' H10' 122.4 . . ?
B12' B10' H10' 122.3 . . ?
C2' B11' B6' 59.7(3) . . ?
C2' B11' B12' 103.1(4) . . ?
B6' B11' B12' 108.1(4) . . ?
C2' B11' B10' 104.4(4) . . ?
B6' B11' B10' 59.8(3) . . ?
B12' B11' B10' 60.3(3) . . ?
C2' B11' B7' 57.7(3) . . ?
B6' B11' B7' 108.6(4) . . ?
B12' B11' B7' 59.5(3) . . ?
B10' B11' B7' 108.1(4) . . ?
C2' B11' H11' 125.5 . . ?
B6' B11' H11' 120.8 . . ?
B12' B11' H11' 122.9 . . ?
B10' B11' H11' 122.3 . . ?
B7' B11' H11' 121.7 . . ?
B7' B12' B11' 61.1(3) . . ?
B7' B12' B9' 108.1(4) . . ?
B11' B12' B9' 107.9(4) . . ?
B7' B12' B10' 109.2(4) . . ?
B11' B12' B10' 60.1(3) . . ?
B9' B12' B10' 59.9(3) . . ?
B7' B12' B8' 60.8(3) . . ?
B11' B12' B8' 110.1(4) . . ?
B9' B12' B8' 60.0(3) . . ?
B10' B12' B8' 109.2(4) . . ?
B7' B12' Cl2' 119.9(4) . . ?
B11' B12' Cl2' 121.1(3) . . ?
B9' B12' Cl2' 122.8(3) . . ?
B10' B12' Cl2' 122.4(3) . . ?
B8' B12' Cl2' 119.7(3) . . ?
O1S Cs1 O1S 86.93(15) . 7_556 ?
O1S Cs1 O2S 59.56(11) . . ?
O1S Cs1 O2S 59.47(11) 7_556 . ?
O1S Cs1 O2S 59.47(11) . 7_556 ?
O1S Cs1 O2S 59.56(11) 7_556 7_556 ?
O2S Cs1 O2S 91.31(15) . 7_556 ?
O1S Cs1 Cl1 59.35(8) . . ?
O1S Cs1 Cl1 124.90(8) 7_556 . ?
O2S Cs1 Cl1 65.80(8) . . ?
O2S Cs1 Cl1 118.02(8) 7_556 . ?
O1S Cs1 Cl1 124.90(8) . 7_556 ?
O1S Cs1 Cl1 59.35(8) 7_556 7_556 ?
O2S Cs1 Cl1 118.03(8) . 7_556 ?
O2S Cs1 Cl1 65.80(8) 7_556 7_556 ?
Cl1 Cs1 Cl1 175.08(4) . 7_556 ?
O1S Cs1 Cl2' 107.72(9) . 3_645 ?
O1S Cs1 Cl2' 131.55(9) 7_556 3_645 ?
O2S Cs1 Cl2' 164.92(8) . 3_645 ?
O2S Cs1 Cl2' 88.06(8) 7_556 3_645 ?
Cl1 Cs1 Cl2' 101.34(3) . 3_645 ?
Cl1 Cs1 Cl2' 75.30(3) 7_556 3_645 ?
O1S Cs1 Cl2' 131.55(9) . 6_465 ?
O1S Cs1 Cl2' 107.72(8) 7_556 6_465 ?
O2S Cs1 Cl2' 88.06(8) . 6_465 ?
O2S Cs1 Cl2' 164.92(8) 7_556 6_465 ?
Cl1 Cs1 Cl2' 75.30(3) . 6_465 ?
Cl1 Cs1 Cl2' 101.34(3) 7_556 6_465 ?
Cl2' Cs1 Cl2' 96.40(4) 3_645 6_465 ?
O1S Cs1 C1S 16.11(14) . . ?
O1S Cs1 C1S 100.77(14) 7_556 . ?
O2S Cs1 C1S 74.30(15) . . ?
O2S Cs1 C1S 61.66(14) 7_556 . ?
Cl1 Cs1 C1S 56.91(12) . . ?
Cl1 Cs1 C1S 126.27(12) 7_556 . ?
Cl2' Cs1 C1S 92.23(13) 3_645 . ?
Cl2' Cs1 C1S 132.20(12) 6_465 . ?
O1S Cs1 C1S 100.77(14) . 7_556 ?
O1S Cs1 C1S 16.11(14) 7_556 7_556 ?
O2S Cs1 C1S 61.66(14) . 7_556 ?
O2S Cs1 C1S 74.30(15) 7_556 7_556 ?
Cl1 Cs1 C1S 126.27(12) . 7_556 ?
Cl1 Cs1 C1S 56.91(12) 7_556 7_556 ?
Cl2' Cs1 C1S 132.20(12) 3_645 7_556 ?
Cl2' Cs1 C1S 92.23(13) 6_465 7_556 ?
C1S Cs1 C1S 115.6(2) . 7_556 ?
O1S Cs1 Cs2 43.46(7) . . ?
O1S Cs1 Cs2 43.46(7) 7_556 . ?
O2S Cs1 Cs2 45.65(7) . . ?
O2S Cs1 Cs2 45.65(7) 7_556 . ?
Cl1 Cs1 Cs2 92.46(2) . . ?
Cl1 Cs1 Cs2 92.46(2) 7_556 . ?
Cl2' Cs1 Cs2 131.80(2) 3_645 . ?
Cl2' Cs1 Cs2 131.80(2) 6_465 . ?
C1S Cs1 Cs2 57.79(11) . . ?
C1S Cs1 Cs2 57.78(11) 7_556 . ?
O1S Cs2 O1S 88.63(16) . 7_556 ?
O1S Cs2 O2S 59.50(11) . . ?
O1S Cs2 O2S 59.41(12) 7_556 . ?
O1S Cs2 O2S 59.41(12) . 7_556 ?
O1S Cs2 O2S 59.50(11) 7_556 7_556 ?
O2S Cs2 O2S 89.48(15) . 7_556 ?
O1S Cs2 Cl1' 127.32(8) . 1_455 ?
O1S Cs2 Cl1' 62.15(8) 7_556 1_455 ?
O2S Cs2 Cl1' 67.84(7) . 1_455 ?
O2S Cs2 Cl1' 121.01(8) 7_556 1_455 ?
O1S Cs2 Cl1' 62.15(8) . 7_546 ?
O1S Cs2 Cl1' 127.32(8) 7_556 7_546 ?
O2S Cs2 Cl1' 121.01(8) . 7_546 ?
O2S Cs2 Cl1' 67.84(7) 7_556 7_546 ?
Cl1' Cs2 Cl1' 168.85(4) 1_455 7_546 ?
O1S Cs2 Cl2 108.89(9) . 6_455 ?
O1S Cs2 Cl2 128.66(8) 7_556 6_455 ?
O2S Cs2 Cl2 88.06(8) . 6_455 ?
O2S Cs2 Cl2 167.25(8) 7_556 6_455 ?
Cl1' Cs2 Cl2 69.35(3) 1_455 6_455 ?
Cl1' Cs2 Cl2 102.94(3) 7_546 6_455 ?
O1S Cs2 Cl2 128.66(8) . 3_545 ?
O1S Cs2 Cl2 108.89(9) 7_556 3_545 ?
O2S Cs2 Cl2 167.25(8) . 3_545 ?
O2S Cs2 Cl2 88.06(8) 7_556 3_545 ?
Cl1' Cs2 Cl2 102.94(3) 1_455 3_545 ?
Cl1' Cs2 Cl2 69.35(3) 7_546 3_545 ?
Cl2 Cs2 Cl2 96.98(4) 6_455 3_545 ?
O1S Cs2 Cs1 44.32(8) . . ?
O1S Cs2 Cs1 44.32(8) 7_556 . ?
O2S Cs2 Cs1 44.74(7) . . ?
O2S Cs2 Cs1 44.74(7) 7_556 . ?
Cl1' Cs2 Cs1 95.58(2) 1_455 . ?
Cl1' Cs2 Cs1 95.58(2) 7_546 . ?
Cl2 Cs2 Cs1 131.51(2) 6_455 . ?
Cl2 Cs2 Cs1 131.51(2) 3_545 . ?
C1S O1S Cs2 136.9(4) . . ?
C1S O1S Cs1 119.4(5) . . ?
Cs2 O1S Cs1 92.22(12) . . ?
C4S O2S Cs1 138.3(4) . . ?
C4S O2S Cs2 132.0(3) . . ?
Cs1 O2S Cs2 89.61(10) . . ?
O1S C1S C3S 122.7(8) . . ?
O1S C1S C2S 120.7(8) . . ?
C3S C1S C2S 116.5(7) . . ?
O1S C1S Cs1 44.5(4) . . ?
C3S C1S Cs1 144.2(5) . . ?
C2S C1S Cs1 84.9(5) . . ?
C1S C2S H2SA 109.5 . . ?
C1S C2S H2SB 109.5 . . ?
H2SA C2S H2SB 109.5 . . ?
C1S C2S H2SC 109.5 . . ?
H2SA C2S H2SC 109.5 . . ?
H2SB C2S H2SC 109.5 . . ?
C1S C3S H3SA 109.5 . . ?
C1S C3S H3SB 109.5 . . ?
H3SA C3S H3SB 109.5 . . ?
C1S C3S H3SC 109.5 . . ?
H3SA C3S H3SC 109.5 . . ?
H3SB C3S H3SC 109.5 . . ?
O2S C4S C6S 122.2(5) . . ?
O2S C4S C5S 121.7(5) . . ?
C6S C4S C5S 116.1(6) . . ?
C4S C5S H5SA 109.5 . . ?
C4S C5S H5SB 109.5 . . ?
H5SA C5S H5SB 109.5 . . ?
C4S C5S H5SC 109.5 . . ?
H5SA C5S H5SC 109.5 . . ?
H5SB C5S H5SC 109.5 . . ?
C4S C6S H6SA 109.5 . . ?
C4S C6S H6SB 109.5 . . ?
H6SA C6S H6SB 109.5 . . ?
C4S C6S H6SC 109.5 . . ?
H6SA C6S H6SC 109.5 . . ?
H6SB C6S H6SC 109.5 . . ?
 
loop_
 _geom_torsion_atom_site_label_1
 _geom_torsion_atom_site_label_2
 _geom_torsion_atom_site_label_3
 _geom_torsion_atom_site_label_4
 _geom_torsion
 _geom_torsion_site_symmetry_1
 _geom_torsion_site_symmetry_2
 _geom_torsion_site_symmetry_3
 _geom_torsion_site_symmetry_4
 _geom_torsion_publ_flag
B5 C1 C2 B11 0.2(5) . . . . ?
B4 C1 C2 B11 69.8(5) . . . . ?
B6 C1 C2 B11 -38.9(4) . . . . ?
Co1 C1 C2 B11 120.5(3) . . . . ?
B5 C1 C2 B7 -69.9(5) . . . . ?
B4 C1 C2 B7 -0.3(5) . . . . ?
B6 C1 C2 B7 -109.0(4) . . . . ?
Co1 C1 C2 B7 50.4(3) . . . . ?
B5 C1 C2 B6 39.0(4) . . . . ?
B4 C1 C2 B6 108.6(4) . . . . ?
Co1 C1 C2 B6 159.4(3) . . . . ?
B5 C1 C2 Co1 -120.3(4) . . . . ?
B4 C1 C2 Co1 -50.7(3) . . . . ?
B6 C1 C2 Co1 -159.4(3) . . . . ?
C2 C1 B4 B9 -63.1(5) . . . . ?
B5 C1 B4 B9 40.6(4) . . . . ?
B6 C1 B4 B9 5.5(5) . . . . ?
Co1 C1 B4 B9 -114.2(3) . . . . ?
C2 C1 B4 B5 -103.7(4) . . . . ?
B6 C1 B4 B5 -35.1(4) . . . . ?
Co1 C1 B4 B5 -154.8(3) . . . . ?
C2 C1 B4 B8 -1.6(5) . . . . ?
B5 C1 B4 B8 102.0(4) . . . . ?
B6 C1 B4 B8 67.0(5) . . . . ?
Co1 C1 B4 B8 -52.7(3) . . . . ?
C2 C1 B4 Co1 51.1(3) . . . . ?
B5 C1 B4 Co1 154.8(3) . . . . ?
B6 C1 B4 Co1 119.7(4) . . . . ?
C2 C1 B5 B6 -39.0(4) . . . . ?
B4 C1 B5 B6 -144.2(4) . . . . ?
Co1 C1 B5 B6 -115.7(4) . . . . ?
C2 C1 B5 B10 2.0(5) . . . . ?
B4 C1 B5 B10 -103.1(4) . . . . ?
B6 C1 B5 B10 41.1(4) . . . . ?
Co1 C1 B5 B10 -74.6(5) . . . . ?
C2 C1 B5 B9 64.3(5) . . . . ?
B4 C1 B5 B9 -40.9(4) . . . . ?
B6 C1 B5 B9 103.3(4) . . . . ?
Co1 C1 B5 B9 -12.4(5) . . . . ?
C2 C1 B5 B4 105.2(4) . . . . ?
B6 C1 B5 B4 144.2(4) . . . . ?
Co1 C1 B5 B4 28.5(4) . . . . ?
B9 B4 B5 C1 -132.5(4) . . . . ?
B8 B4 B5 C1 -95.7(4) . . . . ?
Co1 B4 B5 C1 -25.5(3) . . . . ?
C1 B4 B5 B6 32.6(4) . . . . ?
B9 B4 B5 B6 -99.9(5) . . . . ?
B8 B4 B5 B6 -63.1(5) . . . . ?
Co1 B4 B5 B6 7.1(5) . . . . ?
C1 B4 B5 B10 96.6(4) . . . . ?
B9 B4 B5 B10 -35.9(4) . . . . ?
B8 B4 B5 B10 0.9(5) . . . . ?
Co1 B4 B5 B10 71.2(5) . . . . ?
C1 B4 B5 B9 132.5(4) . . . . ?
B8 B4 B5 B9 36.8(4) . . . . ?
Co1 B4 B5 B9 107.0(4) . . . . ?
B11 C2 B6 C1 138.9(4) . . . . ?
B7 C2 B6 C1 102.1(4) . . . . ?
Co1 C2 B6 C1 23.0(4) . . . . ?
C1 C2 B6 B5 -35.3(4) . . . . ?
B11 C2 B6 B5 103.6(4) . . . . ?
B7 C2 B6 B5 66.8(5) . . . . ?
Co1 C2 B6 B5 -12.3(5) . . . . ?
C1 C2 B6 B11 -138.9(4) . . . . ?
B7 C2 B6 B11 -36.7(4) . . . . ?
Co1 C2 B6 B11 -115.8(4) . . . . ?
C1 C2 B6 B10 -97.5(4) . . . . ?
B11 C2 B6 B10 41.3(4) . . . . ?
B7 C2 B6 B10 4.6(5) . . . . ?
Co1 C2 B6 B10 -74.5(5) . . . . ?
B5 C1 B6 C2 -138.3(4) . . . . ?
B4 C1 B6 C2 -102.5(4) . . . . ?
Co1 C1 B6 C2 -23.6(4) . . . . ?
C2 C1 B6 B5 138.3(4) . . . . ?
B4 C1 B6 B5 35.8(4) . . . . ?
Co1 C1 B6 B5 114.7(4) . . . . ?
C2 C1 B6 B11 34.9(3) . . . . ?
B5 C1 B6 B11 -103.4(4) . . . . ?
B4 C1 B6 B11 -67.7(5) . . . . ?
Co1 C1 B6 B11 11.2(5) . . . . ?
C2 C1 B6 B10 97.4(4) . . . . ?
B5 C1 B6 B10 -40.9(4) . . . . ?
B4 C1 B6 B10 -5.1(5) . . . . ?
Co1 C1 B6 B10 73.8(5) . . . . ?
C1 B5 B6 C2 34.3(3) . . . . ?
B10 B5 B6 C2 -98.6(4) . . . . ?
B9 B5 B6 C2 -61.2(5) . . . . ?
B4 B5 B6 C2 2.4(5) . . . . ?
B10 B5 B6 C1 -133.0(4) . . . . ?
B9 B5 B6 C1 -95.5(4) . . . . ?
B4 B5 B6 C1 -32.0(4) . . . . ?
C1 B5 B6 B11 94.4(4) . . . . ?
B10 B5 B6 B11 -38.6(4) . . . . ?
B9 B5 B6 B11 -1.1(5) . . . . ?
B4 B5 B6 B11 62.4(5) . . . . ?
C1 B5 B6 B10 133.0(4) . . . . ?
B9 B5 B6 B10 37.4(4) . . . . ?
B4 B5 B6 B10 101.0(4) . . . . ?
C1 C2 B7 B12 64.6(4) . . . . ?
B11 C2 B7 B12 -40.1(4) . . . . ?
B6 C2 B7 B12 -4.1(5) . . . . ?
Co1 C2 B7 B12 114.5(3) . . . . ?
C1 C2 B7 B8 2.1(5) . . . . ?
B11 C2 B7 B8 -102.6(4) . . . . ?
B6 C2 B7 B8 -66.6(5) . . . . ?
Co1 C2 B7 B8 51.9(3) . . . . ?
C1 C2 B7 B11 104.7(4) . . . . ?
B6 C2 B7 B11 36.0(4) . . . . ?
Co1 C2 B7 B11 154.5(3) . . . . ?
C1 C2 B7 Co1 -49.8(3) . . . . ?
B11 C2 B7 Co1 -154.5(3) . . . . ?
B6 C2 B7 Co1 -118.6(4) . . . . ?
C2 B7 B8 B9 59.3(4) . . . . ?
B12 B7 B8 B9 -37.8(4) . . . . ?
B11 B7 B8 B9 -1.1(5) . . . . ?
Co1 B7 B8 B9 111.3(3) . . . . ?
C2 B7 B8 B12 97.2(4) . . . . ?
B11 B7 B8 B12 36.7(4) . . . . ?
Co1 B7 B8 B12 149.2(3) . . . . ?
C2 B7 B8 B4 -3.0(5) . . . . ?
B12 B7 B8 B4 -100.2(4) . . . . ?
B11 B7 B8 B4 -63.4(4) . . . . ?
Co1 B7 B8 B4 49.0(3) . . . . ?
C2 B7 B8 Co1 -52.0(3) . . . . ?
B12 B7 B8 Co1 -149.2(3) . . . . ?
B11 B7 B8 Co1 -112.4(3) . . . . ?
C1 B4 B8 B9 -96.5(4) . . . . ?
B5 B4 B8 B9 -36.7(4) . . . . ?
Co1 B4 B8 B9 -148.7(3) . . . . ?
C1 B4 B8 B12 -59.3(4) . . . . ?
B9 B4 B8 B12 37.2(3) . . . . ?
B5 B4 B8 B12 0.5(5) . . . . ?
Co1 B4 B8 B12 -111.5(3) . . . . ?
C1 B4 B8 B7 2.8(5) . . . . ?
B9 B4 B8 B7 99.3(4) . . . . ?
B5 B4 B8 B7 62.6(4) . . . . ?
Co1 B4 B8 B7 -49.5(3) . . . . ?
C1 B4 B8 Co1 52.3(3) . . . . ?
B9 B4 B8 Co1 148.7(3) . . . . ?
B5 B4 B8 Co1 112.1(3) . . . . ?
C1 B5 B9 B12 -61.7(5) . . . . ?
B6 B5 B9 B12 0.8(5) . . . . ?
B10 B5 B9 B12 38.2(3) . . . . ?
B4 B5 B9 B12 -102.0(4) . . . . ?
C1 B5 B9 B10 -100.0(4) . . . . ?
B6 B5 B9 B10 -37.4(4) . . . . ?
B4 B5 B9 B10 -140.3(4) . . . . ?
C1 B5 B9 B4 40.3(3) . . . . ?
B6 B5 B9 B4 102.8(4) . . . . ?
B10 B5 B9 B4 140.3(4) . . . . ?
C1 B5 B9 B8 2.5(5) . . . . ?
B6 B5 B9 B8 65.1(5) . . . . ?
B10 B5 B9 B8 102.5(4) . . . . ?
B4 B5 B9 B8 -37.8(4) . . . . ?
C1 B5 B9 Cl1 149.8(4) . . . . ?
B6 B5 B9 Cl1 -147.6(4) . . . . ?
B10 B5 B9 Cl1 -110.2(4) . . . . ?
B4 B5 B9 Cl1 109.5(4) . . . . ?
C1 B4 B9 B5 -39.5(4) . . . . ?
B8 B4 B9 B5 -138.6(4) . . . . ?
Co1 B4 B9 B5 -106.7(4) . . . . ?
C1 B4 B9 B12 61.0(5) . . . . ?
B5 B4 B9 B12 100.5(4) . . . . ?
B8 B4 B9 B12 -38.1(4) . . . . ?
Co1 B4 B9 B12 -6.2(5) . . . . ?
C1 B4 B9 B10 -3.6(5) . . . . ?
B5 B4 B9 B10 36.0(4) . . . . ?
B8 B4 B9 B10 -102.6(4) . . . . ?
Co1 B4 B9 B10 -70.7(5) . . . . ?
C1 B4 B9 B8 99.0(4) . . . . ?
B5 B4 B9 B8 138.6(4) . . . . ?
Co1 B4 B9 B8 31.9(3) . . . . ?
C1 B4 B9 Cl1 -151.2(4) . . . . ?
B5 B4 B9 Cl1 -111.7(5) . . . . ?
B8 B4 B9 Cl1 109.7(5) . . . . ?
Co1 B4 B9 Cl1 141.6(3) . . . . ?
B12 B8 B9 B5 -100.1(4) . . . . ?
B7 B8 B9 B5 -62.4(5) . . . . ?
B4 B8 B9 B5 37.8(4) . . . . ?
Co1 B8 B9 B5 6.7(5) . . . . ?
B7 B8 B9 B12 37.7(3) . . . . ?
B4 B8 B9 B12 137.9(4) . . . . ?
Co1 B8 B9 B12 106.8(4) . . . . ?
B12 B8 B9 B10 -36.0(4) . . . . ?
B7 B8 B9 B10 1.7(5) . . . . ?
B4 B8 B9 B10 101.9(4) . . . . ?
Co1 B8 B9 B10 70.8(4) . . . . ?
B12 B8 B9 B4 -137.9(4) . . . . ?
B7 B8 B9 B4 -100.2(4) . . . . ?
Co1 B8 B9 B4 -31.1(3) . . . . ?
B12 B8 B9 Cl1 112.0(4) . . . . ?
B7 B8 B9 Cl1 149.6(4) . . . . ?
B4 B8 B9 Cl1 -110.1(4) . . . . ?
Co1 B8 B9 Cl1 -141.2(3) . . . . ?
Cs1 Cl1 B9 B5 -15.2(7) . . . . ?
Cs1 Cl1 B9 B12 -159.3(3) . . . . ?
Cs1 Cl1 B9 B10 -86.8(5) . . . . ?
Cs1 Cl1 B9 B4 57.2(6) . . . . ?
Cs1 Cl1 B9 B8 128.8(4) . . . . ?
C2 B6 B10 B5 97.2(4) . . . . ?
C1 B6 B10 B5 39.7(3) . . . . ?
B11 B6 B10 B5 137.2(4) . . . . ?
C2 B6 B10 B9 60.0(5) . . . . ?
C1 B6 B10 B9 2.4(5) . . . . ?
B5 B6 B10 B9 -37.3(4) . . . . ?
B11 B6 B10 B9 99.9(4) . . . . ?
C2 B6 B10 B11 -39.9(3) . . . . ?
C1 B6 B10 B11 -97.5(4) . . . . ?
B5 B6 B10 B11 -137.2(4) . . . . ?
C2 B6 B10 B12 -3.0(5) . . . . ?
C1 B6 B10 B12 -60.6(4) . . . . ?
B5 B6 B10 B12 -100.3(4) . . . . ?
B11 B6 B10 B12 36.9(4) . . . . ?
C1 B5 B10 B6 -41.1(4) . . . . ?
B9 B5 B10 B6 -138.2(4) . . . . ?
B4 B5 B10 B6 -102.5(4) . . . . ?
C1 B5 B10 B9 97.1(4) . . . . ?
B6 B5 B10 B9 138.2(4) . . . . ?
B4 B5 B10 B9 35.7(4) . . . . ?
C1 B5 B10 B11 -3.3(5) . . . . ?
B6 B5 B10 B11 37.8(4) . . . . ?
B9 B5 B10 B11 -100.4(4) . . . . ?
B4 B5 B10 B11 -64.7(5) . . . . ?
C1 B5 B10 B12 59.3(5) . . . . ?
B6 B5 B10 B12 100.5(4) . . . . ?
B9 B5 B10 B12 -37.7(4) . . . . ?
B4 B5 B10 B12 -2.0(5) . . . . ?
B5 B9 B10 B6 37.1(4) . . . . ?
B12 B9 B10 B6 -100.3(4) . . . . ?
B4 B9 B10 B6 0.7(5) . . . . ?
B8 B9 B10 B6 -64.4(5) . . . . ?
Cl1 B9 B10 B6 148.1(4) . . . . ?
B12 B9 B10 B5 -137.4(4) . . . . ?
B4 B9 B10 B5 -36.4(4) . . . . ?
B8 B9 B10 B5 -101.5(4) . . . . ?
Cl1 B9 B10 B5 111.0(5) . . . . ?
B5 B9 B10 B11 99.9(4) . . . . ?
B12 B9 B10 B11 -37.6(4) . . . . ?
B4 B9 B10 B11 63.5(5) . . . . ?
B8 B9 B10 B11 -1.6(5) . . . . ?
Cl1 B9 B10 B11 -149.2(4) . . . . ?
B5 B9 B10 B12 137.4(4) . . . . ?
B4 B9 B10 B12 101.1(4) . . . . ?
B8 B9 B10 B12 35.9(4) . . . . ?
Cl1 B9 B10 B12 -111.6(5) . . . . ?
C1 C2 B11 B6 38.9(4) . . . . ?
B7 C2 B11 B6 143.4(4) . . . . ?
Co1 C2 B11 B6 114.3(4) . . . . ?
C1 C2 B11 B12 -64.7(5) . . . . ?
B7 C2 B11 B12 39.9(4) . . . . ?
B6 C2 B11 B12 -103.6(4) . . . . ?
Co1 C2 B11 B12 10.7(5) . . . . ?
C1 C2 B11 B10 -2.3(5) . . . . ?
B7 C2 B11 B10 102.3(4) . . . . ?
B6 C2 B11 B10 -41.1(4) . . . . ?
Co1 C2 B11 B10 73.2(5) . . . . ?
C1 C2 B11 B7 -104.6(4) . . . . ?
B6 C2 B11 B7 -143.4(4) . . . . ?
Co1 C2 B11 B7 -29.1(4) . . . . ?
C1 B6 B11 C2 -33.9(3) . . . . ?
B5 B6 B11 C2 -94.1(4) . . . . ?
B10 B6 B11 C2 -132.6(4) . . . . ?
C2 B6 B11 B12 95.1(4) . . . . ?
C1 B6 B11 B12 61.2(4) . . . . ?
B5 B6 B11 B12 1.0(5) . . . . ?
B10 B6 B11 B12 -37.4(3) . . . . ?
C2 B6 B11 B10 132.6(4) . . . . ?
C1 B6 B11 B10 98.6(4) . . . . ?
B5 B6 B11 B10 38.5(3) . . . . ?
C2 B6 B11 B7 32.2(3) . . . . ?
C1 B6 B11 B7 -1.7(5) . . . . ?
B5 B6 B11 B7 -61.9(5) . . . . ?
B10 B6 B11 B7 -100.4(4) . . . . ?
B6 B10 B11 C2 41.2(4) . . . . ?
B5 B10 B11 C2 3.4(5) . . . . ?
B9 B10 B11 C2 -59.6(5) . . . . ?
B12 B10 B11 C2 -97.2(4) . . . . ?
B5 B10 B11 B6 -37.8(4) . . . . ?
B9 B10 B11 B6 -100.8(4) . . . . ?
B12 B10 B11 B6 -138.4(4) . . . . ?
B6 B10 B11 B12 138.4(4) . . . . ?
B5 B10 B11 B12 100.6(4) . . . . ?
B9 B10 B11 B12 37.6(4) . . . . ?
B6 B10 B11 B7 101.7(4) . . . . ?
B5 B10 B11 B7 63.9(5) . . . . ?
B9 B10 B11 B7 0.9(5) . . . . ?
B12 B10 B11 B7 -36.7(4) . . . . ?
B12 B7 B11 C2 133.5(4) . . . . ?
B8 B7 B11 C2 96.5(4) . . . . ?
Co1 B7 B11 C2 26.0(3) . . . . ?
C2 B7 B11 B6 -33.0(4) . . . . ?
B12 B7 B11 B6 100.6(4) . . . . ?
B8 B7 B11 B6 63.5(5) . . . . ?
Co1 B7 B11 B6 -7.0(5) . . . . ?
C2 B7 B11 B12 -133.5(4) . . . . ?
B8 B7 B11 B12 -37.0(4) . . . . ?
Co1 B7 B11 B12 -107.5(4) . . . . ?
C2 B7 B11 B10 -96.3(4) . . . . ?
B12 B7 B11 B10 37.2(4) . . . . ?
B8 B7 B11 B10 0.1(5) . . . . ?
Co1 B7 B11 B10 -70.3(4) . . . . ?
C2 B7 B12 B9 -61.5(4) . . . . ?
B8 B7 B12 B9 38.4(4) . . . . ?
B11 B7 B12 B9 -100.5(4) . . . . ?
Co1 B7 B12 B9 6.8(5) . . . . ?
C2 B7 B12 B11 39.1(3) . . . . ?
B8 B7 B12 B11 138.9(4) . . . . ?
Co1 B7 B12 B11 107.4(4) . . . . ?
C2 B7 B12 B10 1.8(5) . . . . ?
B8 B7 B12 B10 101.7(4) . . . . ?
B11 B7 B12 B10 -37.2(4) . . . . ?
Co1 B7 B12 B10 70.1(4) . . . . ?
C2 B7 B12 B8 -99.9(4) . . . . ?
B11 B7 B12 B8 -138.9(4) . . . . ?
Co1 B7 B12 B8 -31.5(3) . . . . ?
C2 B7 B12 Cl2 150.7(3) . . . . ?
B8 B7 B12 Cl2 -109.4(4) . . . . ?
B11 B7 B12 Cl2 111.7(4) . . . . ?
Co1 B7 B12 Cl2 -141.0(3) . . . . ?
B5 B9 B12 B7 64.1(5) . . . . ?
B10 B9 B12 B7 102.1(4) . . . . ?
B4 B9 B12 B7 -0.4(5) . . . . ?
B8 B9 B12 B7 -38.6(3) . . . . ?
Cl1 B9 B12 B7 -147.6(4) . . . . ?
B5 B9 B12 B11 -0.2(5) . . . . ?
B10 B9 B12 B11 37.8(3) . . . . ?
B4 B9 B12 B11 -64.7(5) . . . . ?
B8 B9 B12 B11 -102.9(4) . . . . ?
Cl1 B9 B12 B11 148.1(4) . . . . ?
B5 B9 B12 B10 -38.0(4) . . . . ?
B4 B9 B12 B10 -102.5(4) . . . . ?
B8 B9 B12 B10 -140.7(4) . . . . ?
Cl1 B9 B12 B10 110.3(4) . . . . ?
B5 B9 B12 B8 102.7(4) . . . . ?
B10 B9 B12 B8 140.7(4) . . . . ?
B4 B9 B12 B8 38.2(4) . . . . ?
Cl1 B9 B12 B8 -109.0(4) . . . . ?
B5 B9 B12 Cl2 -148.5(4) . . . . ?
B10 B9 B12 Cl2 -110.5(4) . . . . ?
B4 B9 B12 Cl2 147.0(4) . . . . ?
B8 B9 B12 Cl2 108.8(4) . . . . ?
Cl1 B9 B12 Cl2 -0.2(6) . . . . ?
C2 B11 B12 B7 -39.2(3) . . . . ?
B6 B11 B12 B7 -101.5(4) . . . . ?
B10 B11 B12 B7 -138.6(4) . . . . ?
C2 B11 B12 B9 61.8(4) . . . . ?
B6 B11 B12 B9 -0.5(5) . . . . ?
B10 B11 B12 B9 -37.7(4) . . . . ?
B7 B11 B12 B9 100.9(4) . . . . ?
C2 B11 B12 B10 99.5(4) . . . . ?
B6 B11 B12 B10 37.2(4) . . . . ?
B7 B11 B12 B10 138.6(4) . . . . ?
C2 B11 B12 B8 -1.8(5) . . . . ?
B6 B11 B12 B8 -64.1(5) . . . . ?
B10 B11 B12 B8 -101.3(4) . . . . ?
B7 B11 B12 B8 37.3(4) . . . . ?
C2 B11 B12 Cl2 -149.8(4) . . . . ?
B6 B11 B12 Cl2 147.9(4) . . . . ?
B10 B11 B12 Cl2 110.8(4) . . . . ?
B7 B11 B12 Cl2 -110.6(5) . . . . ?
B6 B10 B12 B7 0.8(5) . . . . ?
B5 B10 B12 B7 -62.0(5) . . . . ?
B9 B10 B12 B7 -99.8(4) . . . . ?
B11 B10 B12 B7 37.7(4) . . . . ?
B6 B10 B12 B9 100.6(4) . . . . ?
B5 B10 B12 B9 37.9(4) . . . . ?
B11 B10 B12 B9 137.5(4) . . . . ?
B6 B10 B12 B11 -36.9(4) . . . . ?
B5 B10 B12 B11 -99.7(4) . . . . ?
B9 B10 B12 B11 -137.5(4) . . . . ?
B6 B10 B12 B8 65.2(5) . . . . ?
B5 B10 B12 B8 2.4(5) . . . . ?
B9 B10 B12 B8 -35.5(4) . . . . ?
B11 B10 B12 B8 102.0(4) . . . . ?
B6 B10 B12 Cl2 -147.9(4) . . . . ?
B5 B10 B12 Cl2 149.3(4) . . . . ?
B9 B10 B12 Cl2 111.4(4) . . . . ?
B11 B10 B12 Cl2 -111.0(4) . . . . ?
B9 B8 B12 B7 136.9(4) . . . . ?
B4 B8 B12 B7 99.7(4) . . . . ?
Co1 B8 B12 B7 31.1(3) . . . . ?
B7 B8 B12 B9 -136.9(4) . . . . ?
B4 B8 B12 B9 -37.2(3) . . . . ?
Co1 B8 B12 B9 -105.8(4) . . . . ?
B9 B8 B12 B11 99.3(4) . . . . ?
B7 B8 B12 B11 -37.6(4) . . . . ?
B4 B8 B12 B11 62.1(5) . . . . ?
Co1 B8 B12 B11 -6.4(5) . . . . ?
B9 B8 B12 B10 35.4(4) . . . . ?
B7 B8 B12 B10 -101.5(4) . . . . ?
B4 B8 B12 B10 -1.8(5) . . . . ?
Co1 B8 B12 B10 -70.4(5) . . . . ?
B9 B8 B12 Cl2 -112.1(4) . . . . ?
B7 B8 B12 Cl2 111.0(4) . . . . ?
B4 B8 B12 Cl2 -149.3(4) . . . . ?
Co1 B8 B12 Cl2 142.1(3) . . . . ?
Cs2 Cl2 B12 B7 -44.9(4) 4_554 . . . ?
Cs2 Cl2 B12 B9 172.0(4) 4_554 . . . ?
Cs2 Cl2 B12 B11 28.1(4) 4_554 . . . ?
Cs2 Cl2 B12 B10 100.1(4) 4_554 . . . ?
Cs2 Cl2 B12 B8 -116.5(4) 4_554 . . . ?
B5' C1' C2' B7' -70.0(5) . . . . ?
B4' C1' C2' B7' -0.3(5) . . . . ?
B6' C1' C2' B7' -108.8(4) . . . . ?
Co1 C1' C2' B7' 50.2(3) . . . . ?
B5' C1' C2' B11' -0.2(5) . . . . ?
B4' C1' C2' B11' 69.6(5) . . . . ?
B6' C1' C2' B11' -38.9(4) . . . . ?
Co1 C1' C2' B11' 120.1(3) . . . . ?
B5' C1' C2' B6' 38.7(4) . . . . ?
B4' C1' C2' B6' 108.5(4) . . . . ?
Co1 C1' C2' B6' 159.0(3) . . . . ?
B5' C1' C2' Co1 -120.2(4) . . . . ?
B4' C1' C2' Co1 -50.5(3) . . . . ?
B6' C1' C2' Co1 -159.0(3) . . . . ?
C2' C1' B4' B9' -63.1(4) . . . . ?
B5' C1' B4' B9' 40.5(4) . . . . ?
B6' C1' B4' B9' 5.2(5) . . . . ?
Co1 C1' B4' B9' -114.0(3) . . . . ?
C2' C1' B4' B8' -1.8(5) . . . . ?
B5' C1' B4' B8' 101.7(4) . . . . ?
B6' C1' B4' B8' 66.5(4) . . . . ?
Co1 C1' B4' B8' -52.7(3) . . . . ?
C2' C1' B4' B5' -103.5(4) . . . . ?
B6' C1' B4' B5' -35.2(4) . . . . ?
Co1 C1' B4' B5' -154.4(3) . . . . ?
C2' C1' B4' Co1 50.9(3) . . . . ?
B5' C1' B4' Co1 154.4(3) . . . . ?
B6' C1' B4' Co1 119.2(3) . . . . ?
C2' C1' B5' B10' 2.3(5) . . . . ?
B4' C1' B5' B10' -103.3(4) . . . . ?
B6' C1' B5' B10' 40.9(4) . . . . ?
Co1 C1' B5' B10' -74.4(5) . . . . ?
C2' C1' B5' B6' -38.5(4) . . . . ?
B4' C1' B5' B6' -144.1(4) . . . . ?
Co1 C1' B5' B6' -115.2(4) . . . . ?
C2' C1' B5' B9' 64.7(4) . . . . ?
B4' C1' B5' B9' -40.9(3) . . . . ?
B6' C1' B5' B9' 103.2(4) . . . . ?
Co1 C1' B5' B9' -12.0(5) . . . . ?
C2' C1' B5' B4' 105.6(4) . . . . ?
B6' C1' B5' B4' 144.1(4) . . . . ?
Co1 C1' B5' B4' 28.9(4) . . . . ?
B9' B4' B5' C1' -132.5(4) . . . . ?
B8' B4' B5' C1' -95.8(4) . . . . ?
Co1 B4' B5' C1' -25.9(3) . . . . ?
C1' B4' B5' B10' 96.4(4) . . . . ?
B9' B4' B5' B10' -36.1(4) . . . . ?
B8' B4' B5' B10' 0.6(5) . . . . ?
Co1 B4' B5' B10' 70.5(4) . . . . ?
C1' B4' B5' B6' 32.6(4) . . . . ?
B9' B4' B5' B6' -99.9(4) . . . . ?
B8' B4' B5' B6' -63.2(5) . . . . ?
Co1 B4' B5' B6' 6.7(5) . . . . ?
C1' B4' B5' B9' 132.5(4) . . . . ?
B8' B4' B5' B9' 36.7(3) . . . . ?
Co1 B4' B5' B9' 106.6(4) . . . . ?
B7' C2' B6' C1' 102.4(4) . . . . ?
B11' C2' B6' C1' 138.7(4) . . . . ?
Co1 C2' B6' C1' 23.6(4) . . . . ?
C1' C2' B6' B11' -138.7(4) . . . . ?
B7' C2' B6' B11' -36.3(4) . . . . ?
Co1 C2' B6' B11' -115.1(4) . . . . ?
C1' C2' B6' B10' -97.0(4) . . . . ?
B7' C2' B6' B10' 5.4(5) . . . . ?
B11' C2' B6' B10' 41.7(4) . . . . ?
Co1 C2' B6' B10' -73.4(5) . . . . ?
C1' C2' B6' B5' -35.0(4) . . . . ?
B7' C2' B6' B5' 67.4(5) . . . . ?
B11' C2' B6' B5' 103.6(4) . . . . ?
Co1 C2' B6' B5' -11.5(5) . . . . ?
B5' C1' B6' C2' -138.7(4) . . . . ?
B4' C1' B6' C2' -102.7(4) . . . . ?
Co1 C1' B6' C2' -23.9(4) . . . . ?
C2' C1' B6' B11' 35.3(3) . . . . ?
B5' C1' B6' B11' -103.3(4) . . . . ?
B4' C1' B6' B11' -67.4(5) . . . . ?
Co1 C1' B6' B11' 11.4(5) . . . . ?
C2' C1' B6' B10' 98.1(4) . . . . ?
B5' C1' B6' B10' -40.6(4) . . . . ?
B4' C1' B6' B10' -4.7(5) . . . . ?
Co1 C1' B6' B10' 74.1(5) . . . . ?
C2' C1' B6' B5' 138.7(4) . . . . ?
B4' C1' B6' B5' 35.9(4) . . . . ?
Co1 C1' B6' B5' 114.7(4) . . . . ?
C1' B5' B6' C2' 34.1(3) . . . . ?
B10' B5' B6' C2' -99.0(4) . . . . ?
B9' B5' B6' C2' -61.3(5) . . . . ?
B4' B5' B6' C2' 2.2(5) . . . . ?
B10' B5' B6' C1' -133.1(4) . . . . ?
B9' B5' B6' C1' -95.4(4) . . . . ?
B4' B5' B6' C1' -31.9(3) . . . . ?
C1' B5' B6' B11' 94.7(4) . . . . ?
B10' B5' B6' B11' -38.4(4) . . . . ?
B9' B5' B6' B11' -0.6(5) . . . . ?
B4' B5' B6' B11' 62.8(5) . . . . ?
C1' B5' B6' B10' 133.1(4) . . . . ?
B9' B5' B6' B10' 37.7(4) . . . . ?
B4' B5' B6' B10' 101.2(4) . . . . ?
C1' C2' B7' B12' 64.4(4) . . . . ?
B11' C2' B7' B12' -40.2(3) . . . . ?
B6' C2' B7' B12' -4.8(5) . . . . ?
Co1 C2' B7' B12' 114.2(3) . . . . ?
C1' C2' B7' B11' 104.6(4) . . . . ?
B6' C2' B7' B11' 35.5(4) . . . . ?
Co1 C2' B7' B11' 154.4(3) . . . . ?
C1' C2' B7' B8' 2.2(5) . . . . ?
B11' C2' B7' B8' -102.4(4) . . . . ?
B6' C2' B7' B8' -67.0(5) . . . . ?
Co1 C2' B7' B8' 52.0(3) . . . . ?
C1' C2' B7' Co1 -49.8(3) . . . . ?
B11' C2' B7' Co1 -154.4(3) . . . . ?
B6' C2' B7' Co1 -118.9(4) . . . . ?
C2' B7' B8' B9' 59.3(4) . . . . ?
B12' B7' B8' B9' -37.8(3) . . . . ?
B11' B7' B8' B9' -1.5(5) . . . . ?
Co1 B7' B8' B9' 111.6(3) . . . . ?
C2' B7' B8' B12' 97.1(4) . . . . ?
B11' B7' B8' B12' 36.3(4) . . . . ?
Co1 B7' B8' B12' 149.4(3) . . . . ?
C2' B7' B8' B4' -3.2(4) . . . . ?
B12' B7' B8' B4' -100.3(4) . . . . ?
B11' B7' B8' B4' -64.0(4) . . . . ?
Co1 B7' B8' B4' 49.1(3) . . . . ?
C2' B7' B8' Co1 -52.3(3) . . . . ?
B12' B7' B8' Co1 -149.4(3) . . . . ?
B11' B7' B8' Co1 -113.1(3) . . . . ?
C1' B4' B8' B9' -96.5(4) . . . . ?
B5' B4' B8' B9' -36.6(3) . . . . ?
Co1 B4' B8' B9' -148.9(3) . . . . ?
C1' B4' B8' B12' -59.0(4) . . . . ?
B9' B4' B8' B12' 37.5(3) . . . . ?
B5' B4' B8' B12' 0.9(5) . . . . ?
Co1 B4' B8' B12' -111.5(3) . . . . ?
C1' B4' B8' B7' 3.0(4) . . . . ?
B9' B4' B8' B7' 99.5(4) . . . . ?
B5' B4' B8' B7' 63.0(4) . . . . ?
Co1 B4' B8' B7' -49.4(3) . . . . ?
C1' B4' B8' Co1 52.4(3) . . . . ?
B9' B4' B8' Co1 148.9(3) . . . . ?
B5' B4' B8' Co1 112.4(3) . . . . ?
C1' B5' B9' B12' -61.9(4) . . . . ?
B10' B5' B9' B12' 38.1(3) . . . . ?
B6' B5' B9' B12' 0.6(5) . . . . ?
B4' B5' B9' B12' -102.0(4) . . . . ?
C1' B5' B9' B10' -100.0(4) . . . . ?
B6' B5' B9' B10' -37.5(4) . . . . ?
B4' B5' B9' B10' -140.1(4) . . . . ?
C1' B5' B9' B8' 2.2(5) . . . . ?
B10' B5' B9' B8' 102.2(4) . . . . ?
B6' B5' B9' B8' 64.6(5) . . . . ?
B4' B5' B9' B8' -37.9(4) . . . . ?
C1' B5' B9' B4' 40.1(3) . . . . ?
B10' B5' B9' B4' 140.1(4) . . . . ?
B6' B5' B9' B4' 102.6(4) . . . . ?
C1' B5' B9' Cl1' 149.4(4) . . . . ?
B10' B5' B9' Cl1' -110.6(4) . . . . ?
B6' B5' B9' Cl1' -148.1(4) . . . . ?
B4' B5' B9' Cl1' 109.3(4) . . . . ?
B12' B8' B9' B5' -99.6(4) . . . . ?
B7' B8' B9' B5' -62.1(5) . . . . ?
B4' B8' B9' B5' 38.0(4) . . . . ?
Co1 B8' B9' B5' 6.9(5) . . . . ?
B7' B8' B9' B12' 37.5(3) . . . . ?
B4' B8' B9' B12' 137.6(4) . . . . ?
Co1 B8' B9' B12' 106.5(4) . . . . ?
B12' B8' B9' B10' -35.7(4) . . . . ?
B7' B8' B9' B10' 1.8(5) . . . . ?
B4' B8' B9' B10' 101.9(4) . . . . ?
Co1 B8' B9' B10' 70.8(4) . . . . ?
B12' B8' B9' B4' -137.6(4) . . . . ?
B7' B8' B9' B4' -100.1(4) . . . . ?
Co1 B8' B9' B4' -31.1(3) . . . . ?
B12' B8' B9' Cl1' 112.5(4) . . . . ?
B7' B8' B9' Cl1' 150.0(3) . . . . ?
B4' B8' B9' Cl1' -109.9(4) . . . . ?
Co1 B8' B9' Cl1' -141.0(3) . . . . ?
C1' B4' B9' B5' -39.7(3) . . . . ?
B8' B4' B9' B5' -138.5(4) . . . . ?
Co1 B4' B9' B5' -107.0(4) . . . . ?
C1' B4' B9' B12' 60.6(4) . . . . ?
B8' B4' B9' B12' -38.2(3) . . . . ?
B5' B4' B9' B12' 100.3(4) . . . . ?
Co1 B4' B9' B12' -6.7(5) . . . . ?
C1' B4' B9' B10' -3.6(5) . . . . ?
B8' B4' B9' B10' -102.5(4) . . . . ?
B5' B4' B9' B10' 36.0(4) . . . . ?
Co1 B4' B9' B10' -71.0(5) . . . . ?
C1' B4' B9' B8' 98.8(4) . . . . ?
B5' B4' B9' B8' 138.5(4) . . . . ?
Co1 B4' B9' B8' 31.5(3) . . . . ?
C1' B4' B9' Cl1' -151.4(3) . . . . ?
B8' B4' B9' Cl1' 109.7(4) . . . . ?
B5' B4' B9' Cl1' -111.8(4) . . . . ?
Co1 B4' B9' Cl1' 141.3(3) . . . . ?
Cs2 Cl1' B9' B5' -14.1(7) 1_655 . . . ?
Cs2 Cl1' B9' B12' -158.2(3) 1_655 . . . ?
Cs2 Cl1' B9' B10' -85.6(6) 1_655 . . . ?
Cs2 Cl1' B9' B8' 129.9(4) 1_655 . . . ?
Cs2 Cl1' B9' B4' 58.3(7) 1_655 . . . ?
C2' B6' B10' B5' 97.1(4) . . . . ?
C1' B6' B10' B5' 39.5(3) . . . . ?
B11' B6' B10' B5' 137.5(4) . . . . ?
C2' B6' B10' B9' 59.5(5) . . . . ?
C1' B6' B10' B9' 1.9(5) . . . . ?
B11' B6' B10' B9' 99.9(4) . . . . ?
B5' B6' B10' B9' -37.6(4) . . . . ?
C2' B6' B10' B11' -40.5(3) . . . . ?
C1' B6' B10' B11' -98.0(4) . . . . ?
B5' B6' B10' B11' -137.5(4) . . . . ?
C2' B6' B10' B12' -3.5(5) . . . . ?
C1' B6' B10' B12' -61.1(4) . . . . ?
B11' B6' B10' B12' 36.9(4) . . . . ?
B5' B6' B10' B12' -100.6(4) . . . . ?
C1' B5' B10' B6' -41.0(3) . . . . ?
B9' B5' B10' B6' -137.9(4) . . . . ?
B4' B5' B10' B6' -102.0(4) . . . . ?
C1' B5' B10' B9' 97.0(4) . . . . ?
B6' B5' B10' B9' 137.9(4) . . . . ?
B4' B5' B10' B9' 35.9(4) . . . . ?
C1' B5' B10' B11' -3.5(5) . . . . ?
B6' B5' B10' B11' 37.5(4) . . . . ?
B9' B5' B10' B11' -100.4(4) . . . . ?
B4' B5' B10' B11' -64.5(5) . . . . ?
C1' B5' B10' B12' 59.2(5) . . . . ?
B6' B5' B10' B12' 100.1(4) . . . . ?
B9' B5' B10' B12' -37.8(4) . . . . ?
B4' B5' B10' B12' -1.9(5) . . . . ?
B5' B9' B10' B6' 37.6(4) . . . . ?
B12' B9' B10' B6' -99.8(4) . . . . ?
B8' B9' B10' B6' -64.0(5) . . . . ?
B4' B9' B10' B6' 1.1(5) . . . . ?
Cl1' B9' B10' B6' 148.3(4) . . . . ?
B12' B9' B10' B5' -137.4(4) . . . . ?
B8' B9' B10' B5' -101.7(4) . . . . ?
B4' B9' B10' B5' -36.6(4) . . . . ?
Cl1' B9' B10' B5' 110.7(5) . . . . ?
B5' B9' B10' B11' 100.3(4) . . . . ?
B12' B9' B10' B11' -37.1(4) . . . . ?
B8' B9' B10' B11' -1.4(5) . . . . ?
B4' B9' B10' B11' 63.7(5) . . . . ?
Cl1' B9' B10' B11' -149.0(4) . . . . ?
B5' B9' B10' B12' 137.4(4) . . . . ?
B8' B9' B10' B12' 35.7(4) . . . . ?
B4' B9' B10' B12' 100.9(4) . . . . ?
Cl1' B9' B10' B12' -111.9(4) . . . . ?
C1' C2' B11' B6' 39.2(4) . . . . ?
B7' C2' B11' B6' 143.7(4) . . . . ?
Co1 C2' B11' B6' 114.6(4) . . . . ?
C1' C2' B11' B12' -64.3(4) . . . . ?
B7' C2' B11' B12' 40.2(3) . . . . ?
B6' C2' B11' B12' -103.6(4) . . . . ?
Co1 C2' B11' B12' 11.1(5) . . . . ?
C1' C2' B11' B10' -2.0(5) . . . . ?
B7' C2' B11' B10' 102.5(4) . . . . ?
B6' C2' B11' B10' -41.2(4) . . . . ?
Co1 C2' B11' B10' 73.4(5) . . . . ?
C1' C2' B11' B7' -104.5(4) . . . . ?
B6' C2' B11' B7' -143.7(4) . . . . ?
Co1 C2' B11' B7' -29.1(4) . . . . ?
C1' B6' B11' C2' -34.1(3) . . . . ?
B10' B6' B11' C2' -132.4(4) . . . . ?
B5' B6' B11' C2' -94.4(4) . . . . ?
C2' B6' B11' B12' 94.8(4) . . . . ?
C1' B6' B11' B12' 60.7(4) . . . . ?
B10' B6' B11' B12' -37.5(4) . . . . ?
B5' B6' B11' B12' 0.5(5) . . . . ?
C2' B6' B11' B10' 132.4(4) . . . . ?
C1' B6' B11' B10' 98.2(4) . . . . ?
B5' B6' B11' B10' 38.0(4) . . . . ?
C2' B6' B11' B7' 31.8(3) . . . . ?
C1' B6' B11' B7' -2.3(5) . . . . ?
B10' B6' B11' B7' -100.5(4) . . . . ?
B5' B6' B11' B7' -62.5(5) . . . . ?
B6' B10' B11' C2' 41.2(3) . . . . ?
B5' B10' B11' C2' 3.4(5) . . . . ?
B9' B10' B11' C2' -59.8(5) . . . . ?
B12' B10' B11' C2' -97.1(4) . . . . ?
B5' B10' B11' B6' -37.8(4) . . . . ?
B9' B10' B11' B6' -101.0(4) . . . . ?
B12' B10' B11' B6' -138.2(4) . . . . ?
B6' B10' B11' B12' 138.2(4) . . . . ?
B5' B10' B11' B12' 100.4(4) . . . . ?
B9' B10' B11' B12' 37.2(4) . . . . ?
B6' B10' B11' B7' 101.4(4) . . . . ?
B5' B10' B11' B7' 63.6(5) . . . . ?
B9' B10' B11' B7' 0.4(5) . . . . ?
B12' B10' B11' B7' -36.8(4) . . . . ?
B12' B7' B11' C2' 133.2(4) . . . . ?
B8' B7' B11' C2' 96.6(4) . . . . ?
Co1 B7' B11' C2' 26.4(3) . . . . ?
C2' B7' B11' B6' -32.6(4) . . . . ?
B12' B7' B11' B6' 100.6(4) . . . . ?
B8' B7' B11' B6' 64.0(5) . . . . ?
Co1 B7' B11' B6' -6.2(5) . . . . ?
C2' B7' B11' B12' -133.2(4) . . . . ?
B8' B7' B11' B12' -36.5(4) . . . . ?
Co1 B7' B11' B12' -106.8(4) . . . . ?
C2' B7' B11' B10' -96.0(4) . . . . ?
B12' B7' B11' B10' 37.2(4) . . . . ?
B8' B7' B11' B10' 0.7(5) . . . . ?
Co1 B7' B11' B10' -69.6(4) . . . . ?
C2' B7' B12' B11' 39.5(3) . . . . ?
B8' B7' B12' B11' 139.3(4) . . . . ?
Co1 B7' B12' B11' 108.1(4) . . . . ?
C2' B7' B12' B9' -61.4(4) . . . . ?
B11' B7' B12' B9' -100.9(4) . . . . ?
B8' B7' B12' B9' 38.3(4) . . . . ?
Co1 B7' B12' B9' 7.2(5) . . . . ?
C2' B7' B12' B10' 2.1(5) . . . . ?
B11' B7' B12' B10' -37.4(3) . . . . ?
B8' B7' B12' B10' 101.9(4) . . . . ?
Co1 B7' B12' B10' 70.7(4) . . . . ?
C2' B7' B12' B8' -99.7(4) . . . . ?
B11' B7' B12' B8' -139.3(4) . . . . ?
Co1 B7' B12' B8' -31.1(3) . . . . ?
C2' B7' B12' Cl2' 150.8(3) . . . . ?
B11' B7' B12' Cl2' 111.3(4) . . . . ?
B8' B7' B12' Cl2' -109.5(4) . . . . ?
Co1 B7' B12' Cl2' -140.6(3) . . . . ?
C2' B11' B12' B7' -39.3(3) . . . . ?
B6' B11' B12' B7' -101.3(4) . . . . ?
B10' B11' B12' B7' -138.6(4) . . . . ?
C2' B11' B12' B9' 61.9(4) . . . . ?
B6' B11' B12' B9' -0.1(5) . . . . ?
B10' B11' B12' B9' -37.4(4) . . . . ?
B7' B11' B12' B9' 101.1(4) . . . . ?
C2' B11' B12' B10' 99.3(4) . . . . ?
B6' B11' B12' B10' 37.3(4) . . . . ?
B7' B11' B12' B10' 138.6(4) . . . . ?
C2' B11' B12' B8' -1.9(5) . . . . ?
B6' B11' B12' B8' -63.9(5) . . . . ?
B10' B11' B12' B8' -101.2(4) . . . . ?
B7' B11' B12' B8' 37.4(4) . . . . ?
C2' B11' B12' Cl2' -148.7(4) . . . . ?
B6' B11' B12' Cl2' 149.3(4) . . . . ?
B10' B11' B12' Cl2' 112.0(4) . . . . ?
B7' B11' B12' Cl2' -109.4(4) . . . . ?
B5' B9' B12' B7' 64.3(4) . . . . ?
B10' B9' B12' B7' 102.1(4) . . . . ?
B8' B9' B12' B7' -38.7(3) . . . . ?
B4' B9' B12' B7' -0.3(5) . . . . ?
Cl1' B9' B12' B7' -147.3(4) . . . . ?
B5' B9' B12' B11' -0.3(5) . . . . ?
B10' B9' B12' B11' 37.6(3) . . . . ?
B8' B9' B12' B11' -103.3(4) . . . . ?
B4' B9' B12' B11' -64.9(5) . . . . ?
Cl1' B9' B12' B11' 148.1(4) . . . . ?
B5' B9' B12' B10' -37.8(4) . . . . ?
B8' B9' B12' B10' -140.8(4) . . . . ?
B4' B9' B12' B10' -102.4(4) . . . . ?
Cl1' B9' B12' B10' 110.5(4) . . . . ?
B5' B9' B12' B8' 103.0(4) . . . . ?
B10' B9' B12' B8' 140.8(4) . . . . ?
B4' B9' B12' B8' 38.4(3) . . . . ?
Cl1' B9' B12' B8' -108.6(4) . . . . ?
B5' B9' B12' Cl2' -149.1(4) . . . . ?
B10' B9' B12' Cl2' -111.3(4) . . . . ?
B8' B9' B12' Cl2' 107.9(4) . . . . ?
B4' B9' B12' Cl2' 146.3(4) . . . . ?
Cl1' B9' B12' Cl2' -0.7(6) . . . . ?
B6' B10' B12' B7' 0.9(5) . . . . ?
B5' B10' B12' B7' -62.4(5) . . . . ?
B9' B10' B12' B7' -100.3(4) . . . . ?
B11' B10' B12' B7' 37.8(4) . . . . ?
B6' B10' B12' B11' -36.9(4) . . . . ?
B5' B10' B12' B11' -100.1(4) . . . . ?
B9' B10' B12' B11' -138.0(4) . . . . ?
B6' B10' B12' B9' 101.2(4) . . . . ?
B5' B10' B12' B9' 37.9(3) . . . . ?
B11' B10' B12' B9' 138.0(4) . . . . ?
B6' B10' B12' B8' 65.8(5) . . . . ?
B5' B10' B12' B8' 2.5(5) . . . . ?
B9' B10' B12' B8' -35.4(3) . . . . ?
B11' B10' B12' B8' 102.6(4) . . . . ?
B6' B10' B12' Cl2' -146.8(4) . . . . ?
B5' B10' B12' Cl2' 149.9(4) . . . . ?
B9' B10' B12' Cl2' 112.0(4) . . . . ?
B11' B10' B12' Cl2' -110.0(4) . . . . ?
B9' B8' B12' B7' 137.1(4) . . . . ?
B4' B8' B12' B7' 99.6(4) . . . . ?
Co1 B8' B12' B7' 30.8(3) . . . . ?
B9' B8' B12' B11' 99.7(4) . . . . ?
B7' B8' B12' B11' -37.4(4) . . . . ?
B4' B8' B12' B11' 62.2(5) . . . . ?
Co1 B8' B12' B11' -6.6(5) . . . . ?
B7' B8' B12' B9' -137.1(4) . . . . ?
B4' B8' B12' B9' -37.5(3) . . . . ?
Co1 B8' B12' B9' -106.3(4) . . . . ?
B9' B8' B12' B10' 35.4(4) . . . . ?
B7' B8' B12' B10' -101.7(4) . . . . ?
B4' B8' B12' B10' -2.1(5) . . . . ?
Co1 B8' B12' B10' -70.9(4) . . . . ?
B9' B8' B12' Cl2' -113.1(4) . . . . ?
B7' B8' B12' Cl2' 109.8(4) . . . . ?
B4' B8' B12' Cl2' -150.5(3) . . . . ?
Co1 B8' B12' Cl2' 140.7(3) . . . . ?
Cs1 Cl2' B12' B7' -46.6(4) 4_564 . . . ?
Cs1 Cl2' B12' B11' 25.7(4) 4_564 . . . ?
Cs1 Cl2' B12' B9' 170.5(3) 4_564 . . . ?
Cs1 Cl2' B12' B10' 97.9(4) 4_564 . . . ?
Cs1 Cl2' B12' B8' -118.0(4) 4_564 . . . ?
Cs2 O1S C1S C3S 92.1(9) . . . . ?
Cs1 O1S C1S C3S -136.1(6) . . . . ?
Cs2 O1S C1S C2S -90.6(9) . . . . ?
Cs1 O1S C1S C2S 41.2(8) . . . . ?
Cs2 O1S C1S Cs1 -131.8(9) . . . . ?
Cs1 O2S C4S C6S 157.1(5) . . . . ?
Cs2 O2S C4S C6S -18.6(8) . . . . ?
Cs1 O2S C4S C5S -24.1(9) . . . . ?
Cs2 O2S C4S C5S 160.1(4) . . . . ?
 
_refine_diff_density_max    1.290
_refine_diff_density_min   -0.847
_refine_diff_density_rms    0.084

_shelxl_version_number 2014/6

_shelx_res_file
;
TITL siv71.res in P4(1)2(1)2
CELL  0.71073  15.1995  15.1995  24.6019   90.000   90.000   90.000
ZERR   8.000   0.0003   0.0003   0.0007    0.000    0.000    0.000
LATT -1
SYMM -X, -Y, 1/2+Z
SYMM 1/2-Y, 1/2+X, 1/4+Z
SYMM 1/2+Y, 1/2-X, 3/4+Z
SYMM 1/2-X, 1/2+Y, 1/4-Z
SYMM 1/2+X, 1/2-Y, 3/4-Z
SYMM Y, X, -Z
SYMM -Y, -X, 1/2-Z
SFAC C H B CL CO CS O
UNIT 80 240 144 32 8 8 16
TEMP -153.150

ACTA
CONF
HTAB

L.S. 4
BOND $H
FMAP 2
PLAN 10

OMIT     0   4  10
OMIT     0   5   4
OMIT     4   4   2
OMIT     1   1   6
OMIT     5   5   0
OMIT     0   2   3
OMIT     2   2   1
OMIT     1   1   3
OMIT     0   1   3
OMIT     0   3   1
OMIT     0   1   1

WGHT    0.028800   13.586300
FVAR       0.04937
CO1   5    1.001671    0.493460    0.284920    11.00000    0.01073    0.01801 =
         0.00752    0.00055    0.00025   -0.00230
CL1   4    0.752157    0.476819    0.408158    11.00000    0.02742    0.03642 =
         0.02062   -0.01105    0.01374   -0.00983
CL2   4    0.822658    0.256932    0.360693    11.00000    0.02413    0.02465 =
         0.01872    0.00217    0.00023   -0.00843
C1    1    0.883938    0.530977    0.253234    11.00000    0.01229    0.01766 =
         0.01442   -0.00237    0.00099   -0.00127
AFIX   3
H1    2    0.896267    0.589437    0.228734    11.00000   -1.20000
AFIX   0
C2    1    0.914108    0.434647    0.232634    11.00000    0.01494    0.01966 =
         0.01047   -0.00130   -0.00203   -0.00043
AFIX   3
H2    2    0.947628    0.425487    0.193874    11.00000   -1.20000
AFIX   0
B4    3    0.888944    0.540745    0.322390    11.00000    0.01844    0.02250 =
         0.01060   -0.00417    0.00019   -0.00202
AFIX 153
H4    2    0.901986    0.602474    0.345909    11.00000   -1.20000
AFIX   0
B5    3    0.786635    0.526381    0.286393    11.00000    0.01211    0.02479 =
         0.02304   -0.00131    0.00111   -0.00230
AFIX 153
H5    2    0.735712    0.579640    0.286130    11.00000   -1.20000
AFIX   0
B6    3    0.803872    0.460974    0.228215    11.00000    0.01119    0.02527 =
         0.01778   -0.00078   -0.00391   -0.00017
AFIX 153
H6    2    0.765652    0.470619    0.189751    11.00000   -1.20000
AFIX   0
B7    3    0.943361    0.368695    0.285065    11.00000    0.01571    0.01738 =
         0.00748   -0.00126   -0.00128   -0.00345
AFIX 153
H7    2    0.993817    0.315051    0.283507    11.00000   -1.20000
AFIX   0
B8    3    0.924584    0.433427    0.345036    11.00000    0.01438    0.02376 =
         0.01031   -0.00232    0.00130   -0.00715
AFIX 153
H8    2    0.960786    0.422617    0.384121    11.00000   -1.20000
AFIX   0
B9    3    0.810396    0.461390    0.344615    11.00000    0.01431    0.02424 =
         0.01426   -0.00434    0.00498   -0.00892
B10   3    0.757721    0.413178    0.287328    11.00000    0.00926    0.02514 =
         0.01888   -0.00373   -0.00001   -0.00373
AFIX 153
H10   2    0.687640    0.390537    0.288811    11.00000   -1.20000
AFIX   0
B11   3    0.840352    0.356203    0.249652    11.00000    0.01501    0.02285 =
         0.01332   -0.00308   -0.00278   -0.00270
AFIX 153
H11   2    0.825360    0.296107    0.224990    11.00000   -1.20000
AFIX   0
B12   3    0.844049    0.355522    0.321916    11.00000    0.01715    0.02096 =
         0.01076   -0.00149   -0.00149   -0.00516
CL1'  4    1.254674    0.513086    0.404625    11.00000    0.02647    0.02634 =
         0.01974    0.00853   -0.01193   -0.00856
CL2'  4    1.179152    0.733132    0.356638    11.00000    0.02486    0.02011 =
         0.01963   -0.00011    0.00008   -0.00686
C1'   1    1.118775    0.456227    0.251744    11.00000    0.01000    0.01976 =
         0.01298   -0.00158    0.00194    0.00000
AFIX   3
H1'   2    1.106205    0.397237    0.227774    11.00000   -1.20000
AFIX   0
C2'   1    1.087103    0.551895    0.230875    11.00000    0.01669    0.02051 =
         0.00942    0.00255    0.00267   -0.00101
AFIX   3
H2'   2    1.052293    0.559705    0.192435    11.00000   -1.20000
AFIX   0
B4'   3    1.116237    0.447071    0.320923    11.00000    0.01379    0.01862 =
         0.01279    0.00334   -0.00313   -0.00519
AFIX 153
H4'   2    1.104513    0.385357    0.344720    11.00000   -1.20000
AFIX   0
B5'   3    1.217596    0.462344    0.283674    11.00000    0.01401    0.02318 =
         0.01905    0.00309   -0.00082   -0.00110
AFIX 153
H5'   2    1.269230    0.409784    0.283011    11.00000   -1.20000
AFIX   0
B6'   3    1.197227    0.527404    0.225286    11.00000    0.01301    0.02138 =
         0.01811   -0.00115    0.00495    0.00164
AFIX 153
H6'   2    1.234060    0.518115    0.186277    11.00000   -1.20000
AFIX   0
B7'   3    1.059023    0.618396    0.283149    11.00000    0.01368    0.01755 =
         0.01142    0.00241    0.00138   -0.00076
AFIX 153
H7'   2    1.008034    0.671539    0.281686    11.00000   -1.20000
AFIX   0
B8'   3    1.080644    0.554487    0.343485    11.00000    0.01447    0.02067 =
         0.00865    0.00114   -0.00290   -0.00537
AFIX 153
H8'   2    1.045863    0.565514    0.383037    11.00000   -1.20000
AFIX   0
B9'   3    1.194809    0.527540    0.341856    11.00000    0.01472    0.02097 =
         0.01159    0.00437   -0.00426   -0.00596
B10'  3    1.244997    0.575521    0.283618    11.00000    0.01349    0.02251 =
         0.01759    0.00701    0.00064   -0.00185
AFIX 153
H10'  2    1.314957    0.598641    0.284138    11.00000   -1.20000
AFIX   0
B11'  3    1.160942    0.631657    0.246766    11.00000    0.01739    0.02008 =
         0.01299    0.00285    0.00150   -0.00163
AFIX 153
H11'  2    1.174768    0.691760    0.221851    11.00000   -1.20000
AFIX   0
B12'  3    1.159334    0.632534    0.318806    11.00000    0.01529    0.01889 =
         0.01172    0.00337    0.00256   -0.00452
CS1   6    0.607050    0.607050    0.500000    10.50000    0.02415    0.02415 =
         0.02600   -0.00504    0.00504   -0.00849
CS2   6    0.400397    0.400397    0.500000    10.50000    0.02701    0.02701 =
         0.02758    0.00943   -0.00943   -0.00445
O1S   7    0.601564    0.402806    0.501087    11.00000    0.02865    0.04134 =
         0.05486    0.01696    0.00694    0.00145
O2S   7    0.506526    0.504218    0.409116    11.00000    0.04132    0.04598 =
         0.02856    0.00120   -0.00113   -0.00109
C1S   1    0.660799    0.361784    0.523845    11.00000    0.04026    0.06339 =
         0.06632    0.02734    0.00727   -0.01218
C2S   1    0.698323    0.393526    0.579214    11.00000    0.04782    0.05510 =
         0.08596    0.02383   -0.02412   -0.01838
AFIX 137
H2SA  2    0.673937    0.357406    0.608570    11.00000   -1.50000
H2SB  2    0.682144    0.455222    0.585042    11.00000   -1.50000
H2SC  2    0.762558    0.387975    0.578956    11.00000   -1.50000
AFIX   0
C3S   1    0.701418    0.285161    0.500308    11.00000    0.05279    0.05826 =
         0.05585    0.01261    0.01799    0.01430
AFIX 137
H3SA  2    0.702169    0.237438    0.527089    11.00000   -1.50000
H3SB  2    0.761856    0.299305    0.489531    11.00000   -1.50000
H3SC  2    0.667877    0.266585    0.468282    11.00000   -1.50000
AFIX   0
C4S   1    0.506599    0.498907    0.359908    11.00000    0.02263    0.03153 =
         0.03327   -0.00220   -0.00220    0.00045
C5S   1    0.539786    0.572521    0.324723    11.00000    0.04711    0.03886 =
         0.04520    0.00858   -0.00533   -0.00884
AFIX 137
H5SA  2    0.565541    0.618497    0.347674    11.00000   -1.50000
H5SB  2    0.490821    0.597210    0.303772    11.00000   -1.50000
H5SC  2    0.584652    0.549889    0.299764    11.00000   -1.50000
AFIX   0
C6S   1    0.472256    0.419859    0.330704    11.00000    0.06420    0.03891 =
         0.05348   -0.01615    0.01556   -0.01578
AFIX 137
H6SA  2    0.456999    0.374148    0.357168    11.00000   -1.50000
H6SB  2    0.517490    0.397476    0.305914    11.00000   -1.50000
H6SC  2    0.419753    0.436105    0.309875    11.00000   -1.50000

AFIX   0
HKLF 4

REM  siv71.res in P4(1)2(1)2
REM R1 =  0.0311 for    5678 Fo > 4sig(Fo)  and  0.0339 for all    6074 data
REM    330 parameters refined using      0 restraints

END

WGHT      0.0288     13.5861

REM Instructions for potential hydrogen bonds
EQIV $1 y, x-1, -z+1
HTAB C2S Cl1'_$1
HTAB C2S Cl2'_$1
EQIV $2 x-1/2, -y+1/2, -z+3/4
HTAB C6S Cl2_$2

REM Highest difference peak  1.290,  deepest hole -0.847,  1-sigma level  0.084
Q1    1   0.3628  0.3981  0.5171  11.00000  0.05    1.29
Q2    1   0.6330  0.3475  0.4755  11.00000  0.05    0.77
Q3    1   0.5868  0.3231  0.4061  11.00000  0.05    0.72
Q4    1   0.5827  0.5633  0.5015  11.00000  0.05    0.57
Q5    1   0.5735  0.4210  0.4708  11.00000  0.05    0.52
Q6    1   0.9794  0.5424  0.2881  11.00000  0.05    0.45
Q7    1   1.2361  0.5594  0.4211  11.00000  0.05    0.38
Q8    1   0.5877  0.4344  0.5289  11.00000  0.05    0.35
Q9    1   0.5996  0.6206  0.5155  11.00000  0.05    0.35
Q10   1   0.9984  0.5000  0.3144  11.00000  0.05    0.29
;
_shelx_res_checksum   90749

_shelx_hkl_file
;
  -1   1   0   53.86    1.87
   1   1   0   55.88    1.87
   1  -1   0   49.94    1.88
  -2  -1   0   52.87    1.88
  -1   2   0   52.42    1.95
   1  -2   0   51.44    1.94
   2   1   0   52.69    1.89
   2   1   0   52.94    1.88
  -2  -1   0   55.03    1.93
   2   1   0   54.19    1.93
  -2  -1   0   53.87    1.90
   1  -2   0   55.00    1.93
  -1   2   0   53.15    1.92
   0   2   0  394.61   13.36
  -2   0   0  388.16   14.02
   0  -2   0  396.25   13.38
   2   0   0  380.71   14.01
   1   2   0   53.82    1.89
   1   2   0   50.68    1.92
  -1  -2   0   50.71    1.92
   2  -1   0   54.31    1.91
  -2   1   0   54.23    1.90
   2  -1   0   54.46    1.90
  -2   1   0   53.39    1.91
  -1  -2   0   58.04    1.92
   2  -1   0   52.43    1.94
  -1  -2   0   54.66    1.89
   1   2   0   54.11    1.92
  -2   1   0   53.18    1.94
   2   2   0   96.54    3.52
   2  -2   0  105.82    3.60
   2  -2   0  100.92    3.59
  -2  -2   0  110.64    3.53
  -2  -2   0  101.55    3.54
   2  -2   0   95.97    3.54
  -2   2   0   98.29    3.55
   2  -2   0  102.19    3.48
  -2   2   0  100.27    3.47
   2   2   0   99.83    3.54
   2   2   0  100.25    3.54
  -2  -2   0  100.83    3.54
   3   2   0  236.98    8.17
  -2   3   0  233.07    8.25
  -2   3   0  229.49    8.20
   3   2   0  249.32    8.22
   2  -3   0  241.53    8.06
   2  -3   0  233.61    8.25
   2  -3   0  235.26    8.20
  -3  -2   0  232.21    8.17
  -3  -2   0  238.42    8.15
  -3  -2   0  244.52    8.15
  -3  -2   0  246.19    8.21
  -3  -1   0   43.04    1.53
   3   1   0   40.84    1.52
   3   1   0   40.53    1.54
  -1   3   0   38.73    1.60
  -3  -1   0   41.26    1.55
  -3  -1   0   41.68    1.58
   3   1   0   42.74    1.59
   1  -3   0   40.77    1.60
  -1   3   0   44.52    1.59
   3   0   0    0.07    0.06
   0  -3   0    0.09    0.06
   0  -3   0    0.18    0.09
  -3   0   0    0.02    0.06
   0   3   0    0.07    0.03
   0   3   0    0.17    0.07
  -3   0   0    0.05    0.05
   3   0   0    0.05    0.06
   3   0   0    0.06    0.06
   0   3   0    0.07    0.07
  -3   0   0    0.10    0.07
   1   3   0   41.63    1.62
   1   3   0   43.36    1.62
  -3   1   0   44.27    1.59
  -3   1   0   40.53    1.62
   1   3   0   43.38    1.55
   3  -1   0   42.12    1.59
  -3   1   0   43.23    1.59
  -1  -3   0   43.36    1.54
  -1  -3   0   41.24    1.61
   3  -1   0   43.37    1.58
   3  -1   0   40.81    1.62
  -1  -3   0   46.65    1.62
  -2  -3   0  238.63    8.22
  -2  -3   0  243.25    8.19
   3  -2   0  238.25    8.20
   2   3   0  237.55    8.19
   3  -2   0  243.67    8.16
  -3   2   0  238.20    8.21
   2   3   0  227.71    8.20
   3  -2   0  247.00    8.27
  -2  -3   0  244.38    8.18
   2   3   0  234.42    8.20
  -3   2   0  238.28    8.15
  -3   2   0  235.24    8.25
   3   3   0    3.43    0.25
  -3   3   0    2.45    0.18
  -3  -3   0    2.82    0.24
   3  -3   0    2.86    0.25
   3   3   0    2.81    0.24
  -3   3   0    2.72    0.24
   3  -3   0    3.64    0.30
   3   3   0    3.09    0.26
   3  -3   0    2.90    0.28
   3  -3   0    2.88    0.19
  -3  -3   0    2.65    0.24
  -3  -3   0    2.84    0.23
   4   3   0  284.32    9.73
   3  -4   0  280.31    9.85
   3  -4   0  288.90    9.59
  -4  -3   0  285.13    9.76
  -3   4   0  293.04    9.91
  -3   4   0  276.52    9.84
  -3   4   0  286.84    9.59
   3  -4   0  280.90    9.78
  -4  -3   0  281.79    9.71
   4   3   0  271.02    9.89
  -4  -3   0  276.83    9.70
  -4  -3   0  286.28    9.75
   4   2   0   14.01    0.71
  -4  -2   0   13.96    0.66
   2  -4   0   13.05    0.71
  -4  -2   0   13.63    0.64
   2  -4   0   14.25    0.51
  -2   4   0   13.67    0.73
   2  -4   0   13.68    0.69
   4   2   0   14.39    0.66
  -4  -2   0   14.37    0.70
  -2   4   0   13.33    0.69
  -2   4   0   14.37    0.51
  -1   4   0    1.11    0.19
  -4  -1   0    1.02    0.16
   4   1   0    1.17    0.20
  -1   4   0    1.08    0.20
   1  -4   0    0.81    0.17
  -4  -1   0    1.36    0.16
   4   1   0    1.21    0.17
  -4  -1   0    1.02    0.19
   4   1   0    1.02    0.15
   1  -4   0    1.16    0.19
   4   0   0   24.52    1.06
  -4   0   0   25.72    1.06
   0   4   0   25.06    0.90
   4   0   0   24.89    1.00
   0   4   0   23.38    1.05
   0  -4   0   24.44    0.92
   0  -4   0   24.85    1.05
   0   4   0   23.49    1.07
  -4   0   0   25.64    1.00
   0  -4   0   26.25    1.08
  -4   0   0   25.72    1.05
   4   0   0   26.03    1.04
   4  -1   0    1.20    0.19
  -4   1   0    0.89    0.15
   4  -1   0    1.30    0.15
  -1  -4   0    1.40    0.21
  -4   1   0    0.80    0.15
  -1  -4   0    1.15    0.18
  -1  -4   0    0.78    0.12
   1   4   0    0.86    0.13
   1   4   0    0.96    0.18
  -4   1   0    1.16    0.19
   1   4   0    1.02    0.18
   4  -1   0    1.22    0.19
   2   4   0   14.58    0.65
   4  -2   0   14.23    0.72
   2   4   0   13.90    0.69
  -4   2   0   14.04    0.67
  -2  -4   0   14.31    0.64
  -4   2   0   14.07    0.72
   2   4   0   14.09    0.69
  -2  -4   0   14.72    0.68
   4  -2   0   13.47    0.66
  -4   2   0   14.03    0.65
  -2  -4   0   14.21    0.69
   4  -2   0   14.68    0.66
  -4   3   0  280.27    9.95
   4  -3   0  286.26   10.03
  -4   3   0  286.45    9.86
   3   4   0  283.27    9.95
   3   4   0  290.43    9.95
  -3  -4   0  281.22    9.96
  -3  -4   0  291.29    9.92
   4  -3   0  292.32    9.87
   3   4   0  287.68    9.94
   4  -3   0  291.27   10.03
  -3  -4   0  307.95    9.93
   4  -3   0  283.84    9.94
   4  -4   0 1000.00   33.86
  -4   5   0   75.10    2.58
  -4   5   0   72.61    2.80
   4  -5   0   72.33    2.79
   4  -5   0   69.55    2.85
  -5  -4   0   69.85    2.75
   5   4   0   72.40    2.80
   4  -5   0   69.71    2.85
   4  -5   0   72.82    2.58
  -5  -4   0   74.36    2.71
  -5  -4   0   75.46    2.91
   5   4   0   71.58    2.74
   3  -5   0   19.63    1.02
  -3   5   0   18.80    0.71
  -5  -3   0   17.80    0.85
  -5  -3   0   18.56    0.88
   5   3   0   17.79    0.86
  -5  -3   0   18.70    0.84
  -3   5   0   18.62    0.92
  -5  -3   0   18.52    0.91
   3  -5   0   18.67    0.71
   5   3   0   18.94    0.94
   3  -5   0   18.43    0.96
  -3   5   0   17.96    1.07
  -5  -2   0    1.03    0.21
   5   2   0    0.67    0.15
   5   2   0    0.52    0.17
  -5  -2   0    0.89    0.18
  -2   5   0    0.48    0.16
   5   2   0    0.85    0.17
  -2   5   0    0.40    0.17
   2  -5   0    0.84    0.19
   2  -5   0    0.86    0.21
  -5  -2   0    0.73    0.15
   5   1   0  371.86   13.01
  -1   5   0  371.27   13.16
  -5  -1   0  379.68   13.08
   5   1   0  387.64   13.06
  -5  -1   0  368.04   13.02
   1  -5   0  409.49   13.14
  -5  -1   0  381.74   13.11
   1  -5   0  376.99   13.16
  -1   5   0  386.58   13.14
   5   1   0  385.34   13.14
   0   5   0    0.12    0.11
   0  -5   0    0.04    0.08
   0  -5   0    0.15    0.05
   5   0   0    0.04    0.07
   0  -5   0    0.10    0.10
   5   0   0   -0.01    0.11
  -5   0   0    0.13    0.08
   5   0   0   -0.01    0.07
   0   5   0    0.08    0.05
  -5   0   0   -0.04    0.08
  -5   0   0    0.04    0.09
   0   5   0    0.10    0.10
   1   5   0  384.67   13.32
   1   5   0  384.65   13.04
   5  -1   0  374.43   13.18
   1   5   0  371.41   13.21
   5  -1   0  392.60   13.12
   5  -1   0  385.70   13.18
  -5   1   0  373.75   13.11
  -1  -5   0  388.17   13.03
  -1  -5   0  404.29   13.19
  -5   1   0  383.26   13.21
  -1  -5   0  387.38   13.22
  -5   1   0  380.99   13.16
   2   5   0    0.73    0.17
   2   5   0    0.69    0.18
   5  -2   0    0.87    0.20
  -5   2   0    0.88    0.18
   2   5   0    0.66    0.15
  -2  -5   0    1.02    0.20
   5  -2   0    0.97    0.18
  -5   2   0    0.91    0.20
  -2  -5   0    0.65    0.15
  -2  -5   0    1.04    0.20
   5  -2   0    0.89    0.17
  -5   2   0    1.00    0.18
  -3  -5   0   19.11    0.89
  -3  -5   0   17.80    0.91
   3   5   0   19.20    0.92
   3   5   0   18.12    0.87
   5  -3   0   19.09    0.90
  -5   3   0   18.95    0.86
   3   5   0   19.35    0.93
  -3  -5   0   18.68    0.86
   5  -3   0   18.92    0.86
  -5   3   0   20.83    0.93
   5  -3   0   18.82    0.96
   4   5   0   78.52    2.78
  -5   4   0   74.24    2.78
   4   5   0   73.95    2.77
   4   5   0   71.03    2.76
  -5   4   0   73.31    2.65
   5  -4   0   71.27    3.01
  -4  -5   0   68.49    2.76
  -4  -5   0   72.88    2.73
   5  -4   0   66.90    2.83
   5  -4   0   71.35    2.65
  -4  -5   0   72.77    2.72
   5  -5   0   15.24    0.92
  -5  -5   0   14.36    0.82
  -5   5   0   14.64    0.70
  -5  -5   0   16.22    0.84
   5  -5   0   15.56    0.71
   5  -5   0   15.84    0.86
   5   5   0   14.95    0.85
  -5  -5   0   14.83    0.78
   5  -5   0   16.67    0.93
   5   5   0   15.39    0.82
  -5   5   0   15.34    0.85
   5   5   0   16.25    0.91
  -5   6   0    4.61    0.30
   5  -6   0    4.01    0.29
   6   5   0    4.05    0.39
  -6  -5   0    3.62    0.40
   6   5   0    4.97    0.47
  -5   6   0    4.41    0.43
  -6  -5   0    4.20    0.39
   5  -6   0    5.53    0.90
   5  -6   0    4.55    0.50
  -6  -5   0    3.86    0.39
   5  -6   0    4.03    0.44
  -6  -5   0    4.69    0.45
   6   4   0  430.99   14.95
  -6  -4   0  442.30   14.94
  -6  -4   0  434.23   14.91
   6   4   0  434.87   15.06
   4  -6   0  427.40   15.11
   4  -6   0  434.30   15.04
  -6  -4   0  436.92   15.02
  -4   6   0  417.71   15.12
  -4   6   0  427.59   15.04
   4  -6   0  447.02   14.73
  -6  -4   0  444.28   14.99
  -4   6   0  444.16   14.72
  -6  -3   0    2.84    0.32
  -6  -3   0    2.61    0.29
   3  -6   0    2.91    0.34
   3  -6   0    2.95    0.43
   6   3   0    2.93    0.40
  -3   6   0    2.51    0.41
  -6  -3   0    2.57    0.26
  -3   6   0    3.35    0.35
   6   3   0    2.58    0.28
  -2   6   0   42.80    1.88
   6   2   0   45.47    1.75
   6   2   0   43.53    1.71
  -6  -2   0   41.61    1.80
  -6  -2   0   42.49    1.71
  -2   6   0   41.29    1.81
   2  -6   0   44.63    1.87
   6   2   0   43.27    1.84
  -6  -2   0   43.69    1.88
   2  -6   0   46.24    1.84
  -6  -1   0   31.78    1.40
   6   1   0   32.38    1.34
   6   1   0   32.38    1.46
   1  -6   0   35.75    1.47
   1  -6   0   34.01    1.49
  -6  -1   0   33.51    1.35
  -1   6   0   33.93    1.46
  -6  -1   0   33.78    1.44
  -1   6   0   31.74    1.48
   6   1   0   31.83    1.37
   6   0   0   50.71    2.05
   0   6   0   51.53    2.23
   0  -6   0   51.63    2.06
   6   0   0   50.93    1.94
   0   6   0   48.84    2.03
   0   6   0   50.17    1.79
   6   0   0   50.04    1.99
   0  -6   0   49.10    1.78
  -6   0   0   51.65    1.95
   0  -6   0   49.55    2.13
  -6   0   0   51.45    2.03
  -6   1   0   32.37    1.41
  -1  -6   0   32.65    1.25
  -1  -6   0   33.02    1.44
   6  -1   0   33.40    1.43
   6  -1   0   31.76    1.41
   1   6   0   32.88    1.26
  -6   1   0   33.07    1.37
   6  -1   0   32.48    1.35
   1   6   0   34.02    1.45
  -6   1   0   33.35    1.57
  -2  -6   0   44.17    1.84
  -6   2   0   44.04    1.77
   6  -2   0   42.17    1.75
  -6   2   0   44.82    1.79
   6  -2   0   44.84    1.85
  -2  -6   0   46.11    1.70
   2   6   0   43.43    1.83
  -6   2   0   42.93    1.85
   6  -2   0   45.05    1.81
   2   6   0   44.77    1.71
  -3  -6   0    3.01    0.33
  -6   3   0    2.48    0.31
   3   6   0    3.04    0.30
  -3  -6   0    3.28    0.28
  -6   3   0    3.17    0.30
  -6   3   0    3.26    0.33
   3   6   0    3.29    0.35
   6  -3   0    2.89    0.31
   6  -3   0    3.15    0.30
   3   6   0    2.65    0.31
  -6   4   0  442.14   14.97
  -4  -6   0  406.10   14.90
   6  -4   0  438.92   15.08
   4   6   0  445.33   14.99
   4   6   0  441.81   14.94
   6  -4   0  427.31   15.06
   6  -4   0  431.06   14.95
  -4  -6   0  442.55   14.90
  -4  -6   0  431.92   14.99
  -6   4   0  441.96   14.86
   4   6   0  427.90   14.98
   5   6   0    3.54    0.38
   5   6   0    4.43    0.41
  -5  -6   0    4.01    0.37
   6  -5   0    4.03    0.41
   6  -5   0    4.23    0.34
  -5  -6   0    4.65    0.44
  -6   5   0    3.76    0.41
   6  -5   0    4.39    0.59
   6  -5   0    3.81    0.44
  -6   5   0    4.00    0.33
   5   6   0    4.57    0.42
  -5  -6   0    4.77    0.42
   6   6   0  115.22    4.34
   6  -6   0  119.70    4.46
   6   6   0  115.62    4.28
  -6  -6   0  118.97    4.33
   6  -6   0  117.49    4.11
  -6   6   0  117.40    4.34
  -6  -6   0  110.11    4.28
  -6  -6   0  104.66    4.20
  -6   6   0  112.81    4.09
  -7  -6   0   80.83    3.01
   7   6   0   77.07    3.15
  -7  -6   0   75.41    3.08
   6  -7   0   77.35    3.22
  -6   7   0   77.28    2.82
  -6   7   0   76.58    3.12
   7   6   0   78.58    3.06
  -7  -6   0   77.82    3.04
   6  -7   0   76.99    2.83
   7   5   0   11.52    0.73
   5  -7   0   11.74    0.83
  -5   7   0   13.31    0.83
   5  -7   0   12.09    0.56
  -7  -5   0   11.72    0.76
  -7  -5   0   12.38    0.71
   7   5   0   11.65    0.80
  -5   7   0   14.22    0.58
  -7  -5   0   12.53    0.74
  -7  -4   0    4.16    0.39
  -4   7   0    3.70    0.43
  -4   7   0    3.88    0.21
   4  -7   0    4.11    0.21
   7   4   0    3.98    0.43
   4  -7   0    3.79    0.44
   7   4   0    3.65    0.37
  -7  -4   0    4.29    0.38
   7   3   0    6.13    0.53
   7   3   0    6.32    0.46
   3  -7   0    6.18    0.54
  -7  -3   0    6.24    0.45
  -7  -3   0    5.34    0.46
  -3   7   0    6.18    0.52
   2  -7   0  294.21   10.51
  -7  -2   0  306.02   10.34
   7   2   0  303.34   10.36
  -7  -2   0  300.36   10.46
  -2   7   0  287.42   10.56
   7   2   0  305.04   10.52
  -7  -2   0  302.56   10.42
   2  -7   0  306.06   10.48
  -2   7   0  288.18   10.47
   7   2   0  293.21   10.32
  -1   7   0   14.34    0.80
   7   1   0   12.20    0.77
  -7  -1   0   11.52    0.74
   7   1   0   13.70    0.72
   7   1   0   13.38    0.69
  -1   7   0   12.70    0.81
  -7  -1   0   12.41    0.68
   1  -7   0   13.11    0.76
  -7  -1   0   13.34    0.75
   1  -7   0   11.80    0.76
   0  -7   0    0.03    0.12
  -7   0   0    0.01    0.12
   0  -7   0    0.09    0.15
  -7   0   0    0.14    0.15
   7   0   0    0.05    0.12
   7   0   0    0.65    0.21
   0   7   0    0.05    0.06
   0   7   0    0.05    0.14
   0   7   0    0.50    0.20
   7   0   0    0.32    0.14
  -7   0   0    0.34    0.15
   0  -7   0    0.24    0.07
   1   7   0   13.43    0.79
   7  -1   0   13.73    0.77
  -7   1   0   12.57    0.70
   1   7   0   12.48    0.59
  -7   1   0   12.91    0.77
  -1  -7   0   12.19    0.58
  -7   1   0   12.50    0.74
  -1  -7   0   13.30    0.77
   7  -1   0   13.18    0.70
   1   7   0   13.81    0.82
   7  -1   0   13.52    0.79
  -1  -7   0   12.75    0.77
   2   7   0  294.31   10.60
   2   7   0  292.54   10.63
  -2  -7   0  294.08   10.60
   7  -2   0  307.06   10.64
  -2  -7   0  312.34   10.40
  -7   2   0  306.49   10.65
   7  -2   0  310.54   10.58
  -7   2   0  305.40   10.52
   7  -2   0  292.43   10.60
   2   7   0  311.12   10.43
  -2  -7   0  308.50   10.58
  -7   2   0  302.82   10.55
  -3  -7   0    5.99    0.47
   3   7   0    6.41    0.51
  -7   3   0    6.33    0.48
  -3  -7   0    6.04    0.42
  -3  -7   0    5.89    0.49
   3   7   0    5.52    0.50
   7  -3   0    6.24    0.47
  -7   3   0    5.54    0.51
   7  -3   0    4.91    0.47
  -7   3   0    6.42    0.49
   7  -3   0    6.40    0.48
  -4  -7   0    4.10    0.39
  -4  -7   0    4.32    0.44
   7  -4   0    4.02    0.38
   7  -4   0    4.34    0.47
   7  -4   0    3.29    0.38
  -7   4   0    3.31    0.38
   4   7   0    3.51    0.37
   4   7   0    4.88    0.44
  -7   4   0    4.18    0.37
   7  -4   0    4.04    0.45
   4   7   0    3.95    0.42
  -7   5   0   12.68    0.80
   7  -5   0   12.62    0.71
  -5  -7   0   13.33    0.76
   5   7   0   14.43    0.81
  -5  -7   0   12.66    0.81
   7  -5   0   11.22    0.84
   5   7   0   12.54    0.79
  -7   5   0   13.07    0.71
  -5  -7   0   14.33    0.78
   5   7   0   10.97    0.76
  -7   6   0   78.46    3.15
   7  -6   0   78.59    2.95
  -6  -7   0   79.97    3.07
  -7   6   0   81.87    2.96
  -6  -7   0   74.89    3.13
   6   7   0   77.10    3.13
   6   7   0   84.29    3.16
   7  -6   0   75.05    3.24
   7   7   0   53.94    2.35
   7  -7   0   52.75    2.44
  -7  -7   0   49.83    2.29
  -7   7   0   57.77    2.38
  -7   7   0   55.88    2.09
  -7  -7   0   52.69    2.27
  -8  -7   0   67.56    2.81
   8   7   0   69.01    2.89
  -7   8   0   64.07    2.49
  -7   8   0   69.45    2.87
  -8  -7   0   67.00    2.76
   7  -8   0   66.62    2.50
   7  -8   0   65.85    2.94
  -8  -6   0  109.92    4.21
   6  -8   0  109.03    3.84
   8   6   0  112.74    4.30
  -8  -6   0  110.17    4.13
   6  -8   0  110.04    4.34
  -8  -6   0  110.42    4.20
  -6   8   0  105.65    3.83
  -6   8   0  102.98    4.22
  -8  -5   0    1.39    0.32
  -5   8   0    1.73    0.35
   5  -8   0    1.78    0.42
  -8  -5   0    1.55    0.30
   8   5   0    1.70    0.38
  -5   8   0    1.34    0.15
   5  -8   0    1.20    0.15
  -8  -5   0    1.00    0.25
   8   5   0    1.39    0.32
  -8  -4   0   19.64    1.00
  -4   8   0   19.89    1.11
   8   4   0   19.46    1.01
  -8  -4   0   20.50    0.99
   8   4   0   19.70    1.13
   4  -8   0   18.51    1.12
  -8  -4   0   19.08    1.04
   8   3   0   74.98    2.99
  -8  -3   0   74.81    2.97
  -8  -3   0   74.42    2.90
   8   3   0   75.55    3.08
   3  -8   0   77.85    3.11
   8   3   0   74.25    2.91
  -3   8   0   78.14    3.08
   8   2   0  132.20    4.99
   2  -8   0  127.44    4.98
  -8  -2   0  135.04    4.91
   8   2   0  132.03    4.83
   8   2   0  132.56    4.79
  -8  -2   0  136.08    4.81
  -2   8   0  132.59    4.97
   8   1   0   16.12    0.96
   8   1   0   15.25    0.84
  -1   8   0   15.19    0.92
   8   1   0   15.27    0.80
   1  -8   0   16.41    0.95
  -8  -1   0   15.44    0.81
  -8  -1   0   14.86    0.88
   8   0   0  296.54   10.31
   0  -8   0  292.79    9.96
   8   0   0  293.84   10.27
   0   8   0  297.08    9.97
  -8   0   0  294.66   10.34
   0   8   0  288.03   10.36
   8   0   0  294.26   10.37
   0  -8   0  296.17   10.39
  -8   0   0  291.63   10.21
   8  -1   0   15.58    0.87
  -8   1   0   16.06    0.97
  -1  -8   0   13.52    0.87
   1   8   0   16.87    0.94
  -8   1   0   14.91    0.81
   8  -1   0   15.14    0.81
   8  -1   0   15.10    0.90
  -8   1   0   15.24    0.90
  -1  -8   0   15.00    0.67
   1   8   0   15.03    0.69
   8  -2   0  137.85    4.97
  -8   2   0  130.61    4.92
   8  -2   0  131.60    4.97
   2   8   0  139.12    5.01
  -8   2   0  136.00    5.02
   8  -2   0  129.08    4.85
  -2  -8   0  132.67    4.73
  -2  -8   0  133.27    4.99
   2   8   0  133.11    4.75
  -8   2   0  136.52    4.89
   3   8   0   74.44    3.02
  -3  -8   0   74.69    3.01
   8  -3   0   73.93    3.03
   8  -3   0   78.96    2.94
  -8   3   0   76.59    3.07
  -8   3   0   75.42    2.94
   3   8   0   76.05    2.85
  -8   3   0   71.46    2.91
  -3  -8   0   74.54    2.81
   8  -3   0   75.48    2.96
  -8   4   0   18.82    1.00
  -8   4   0   19.34    1.05
   8  -4   0   20.11    1.03
   4   8   0   20.68    1.11
  -4  -8   0   20.05    0.98
  -4  -8   0   19.59    1.10
   4   8   0   20.09    1.01
  -8   5   0    1.54    0.29
  -8   5   0    1.13    0.31
  -5  -8   0    1.29    0.30
   8  -5   0    1.29    0.27
   5   8   0    1.61    0.31
   8  -5   0    1.64    0.39
  -5  -8   0    1.29    0.33
   5   8   0    1.44    0.37
   8  -6   0  110.92    4.07
  -8   6   0  110.82    4.25
   8  -6   0  112.59    4.38
   6   8   0  110.69    4.23
   6   8   0  105.94    4.22
  -8   6   0  109.75    4.05
  -6  -8   0  107.98    4.24
  -8   7   0   69.46    2.83
  -8   7   0   67.06    2.70
  -7  -8   0   64.13    2.79
   8  -7   0   68.12    2.96
   7   8   0   65.27    2.82
   8  -7   0   66.16    2.59
  -8  -8   0   35.62    1.76
  -8  -8   0   37.48    1.73
  -8   8   0   34.89    1.77
   8   8   0   34.21    1.78
  -8   8   0   35.95    1.50
   8  -8   0   35.53    1.50
   8  -8   0   33.57    1.87
   8  -9   0    6.33    0.70
  -9  -8   0    6.97    0.67
  -9  -8   0    6.68    0.63
  -8   9   0    6.30    0.46
   9   8   0    7.32    0.83
  -8   9   0    6.54    0.69
   7  -9   0   30.97    1.72
   7  -9   0   31.47    1.24
   9   7   0   30.80    1.66
  -9  -7   0   31.02    1.52
  -7   9   0   29.34    1.23
  -9  -7   0   30.58    1.58
  -7   9   0   30.15    1.63
   6  -9   0   36.61    1.94
  -6   9   0   37.80    1.87
  -6   9   0   39.81    1.44
  -9  -6   0   37.35    1.82
   9   6   0   42.10    1.98
  -9  -6   0   40.21    1.78
   6  -9   0   38.17    1.44
  -9  -5   0  282.34    9.66
   5  -9   0  263.75    9.87
  -9  -5   0  267.00    9.72
   9   5   0  275.52    9.87
  -9  -5   0  274.10    9.61
  -5   9   0  276.32    9.83
  -9  -4   0   24.19    1.20
  -4   9   0   23.07    1.31
  -9  -4   0   25.61    1.29
   4  -9   0   24.14    1.37
   9   4   0   25.58    1.39
  -9  -4   0   24.43    1.18
   9   4   0   23.93    1.21
   9   3   0  128.55    4.81
   9   3   0  128.88    5.05
  -9  -3   0  135.95    4.86
   9   3   0  133.82    4.87
  -3   9   0  134.86    5.04
  -9  -3   0  131.24    4.94
   3  -9   0  131.81    5.07
   9   2   0    1.48    0.31
   2  -9   0    0.96    0.30
   9   2   0    1.07    0.25
  -9  -2   0    1.70    0.30
   9   2   0    0.83    0.30
  -9  -2   0    1.98    0.37
  -2   9   0    1.32    0.34
  -1   9   0   22.74    1.28
   9   1   0   24.56    1.15
   9   1   0   25.57    1.21
   9   1   0   24.49    1.32
   1  -9   0   24.85    1.32
  -9  -1   0   23.70    1.25
  -9  -1   0   25.30    1.17
   0  -9   0    0.19    0.08
   9   0   0   -0.08    0.14
   0  -9   0    0.20    0.17
  -9   0   0    0.12    0.15
   9   0   0   -0.08    0.15
   0   9   0    0.42    0.21
   0   9   0    0.02    0.08
  -9   0   0    0.02    0.14
   9   0   0   -0.27    0.13
  -1  -9   0   23.64    0.98
   9  -1   0   24.94    1.24
  -9   1   0   25.04    1.18
   1   9   0   24.77    1.00
   1   9   0   22.06    1.26
  -1  -9   0   23.89    1.29
  -9   1   0   24.91    1.28
   9  -1   0   24.09    1.27
   9  -1   0   23.15    1.14
   2   9   0    0.65    0.23
   9  -2   0    1.31    0.32
  -9   2   0    0.98    0.25
  -2  -9   0    0.92    0.20
  -2  -9   0    1.43    0.32
   9  -2   0    1.07    0.27
  -9   2   0    1.40    0.34
   9  -2   0    0.99    0.27
   2   9   0    0.90    0.19
   9  -3   0  132.91    4.98
  -9   3   0  135.29    5.09
  -3  -9   0  130.72    4.77
   3   9   0  134.63    5.06
  -9   3   0  134.98    4.95
   3   9   0  134.10    4.82
  -3  -9   0  130.29    5.02
  -4  -9   0   22.34    1.15
  -9   4   0   24.31    1.26
   4   9   0   26.09    1.22
   4   9   0   26.13    1.35
   9  -4   0   28.11    1.31
  -4  -9   0   23.53    1.32
   5   9   0  275.53    9.70
   9  -5   0  265.01    9.90
  -5  -9   0  277.37    9.83
  -9   5   0  272.58    9.67
   5   9   0  270.99    9.82
  -9   5   0  282.47    9.78
   9  -5   0  283.43    9.70
  -5  -9   0  265.85    9.62
  -6  -9   0   38.51    1.89
  -9   6   0   40.62    1.74
   6   9   0   37.84    1.87
   9  -6   0   39.46    1.75
   9  -6   0   38.18    1.97
   6   9   0   40.24    1.85
  -9   6   0   42.56    1.91
   7   9   0   29.14    1.58
   7   9   0   32.29    1.61
   9  -7   0   30.85    1.43
   9  -7   0   32.09    1.74
  -9   7   0   30.96    1.42
  -9   7   0   30.50    1.60
  -7  -9   0   31.70    1.62
   8   9   0    7.34    0.70
   9  -8   0    7.77    0.78
  -9   8   0    6.56    0.52
  -9   8   0    5.55    0.61
   9  -8   0    6.29    0.51
  -8  -9   0    6.74    0.64
  -8  -9   0    6.59    0.64
  -9  -9   0   82.59    3.48
  -9   9   0   83.18    3.52
  -9  -9   0   84.29    3.44
   9  -9   0   82.80    3.63
   9   9   0   83.28    3.54
   9  -9   0   80.54    3.13
  10   9   0   26.80    1.57
  -9  10   0   26.02    1.52
   9 -10   0   21.84    1.52
   9 -10   0   22.94    1.11
 -10  -9   0   26.81    1.70
  -9  10   0   23.91    1.11
 -10  -9   0   24.92    1.40
  -8  10   0   89.53    3.90
  -8  10   0   96.10    3.41
   8 -10   0   91.94    3.41
 -10  -8   0   95.21    3.89
 -10  -8   0   97.48    3.82
   8 -10   0   95.54    4.07
  10   8   0   98.30    4.02
   7 -10   0   19.19    1.31
 -10  -7   0   18.42    1.17
   7 -10   0   19.44    0.80
 -10  -7   0   18.94    1.12
  -7  10   0   20.42    0.80
  10   7   0   18.83    1.29
  -7  10   0   21.72    1.29
 -10  -6   0   29.04    1.54
  -6  10   0   29.41    1.62
  10   6   0   31.88    1.72
   6 -10   0   30.89    1.69
 -10  -6   0   30.49    1.50
   5 -10   0   19.69    1.22
 -10  -5   0   17.33    1.00
  10   5   0   15.52    1.21
  -5  10   0   16.75    1.12
 -10  -5   0   17.21    1.07
 -10  -4   0    6.01    0.58
  10   4   0    7.98    0.73
   4 -10   0    6.25    0.67
 -10  -4   0    6.73    0.56
  -4  10   0    6.41    0.64
   3 -10   0   36.51    1.84
 -10  -3   0   35.37    1.72
  10   3   0   34.65    1.60
 -10  -3   0   38.01    1.66
  10   3   0   35.65    1.83
  -3  10   0   39.01    1.84
  -2  10   0   82.20    3.36
  10   2   0   81.76    3.39
 -10  -2   0   80.03    3.14
   2 -10   0   81.46    3.38
  10   2   0   79.70    3.13
 -10  -2   0   81.54    3.27
  -1  10   0   52.77    2.43
   1 -10   0   56.24    2.49
  10   1   0   52.57    2.24
 -10  -1   0   57.08    2.28
 -10  -1   0   55.71    2.41
  10   1   0   58.68    2.50
 -10   0   0  197.62    7.14
  10   0   0  190.21    7.16
   0  10   0  196.35    7.18
   0 -10   0  195.78    7.18
  10   0   0  187.39    6.94
   0  10   0  197.68    6.63
   0 -10   0  190.86    6.62
 -10   0   0  199.81    6.98
 -10   1   0   55.84    2.27
  -1 -10   0   57.26    2.45
  10  -1   0   54.66    2.41
  10  -1   0   57.75    2.39
   1  10   0   54.24    2.03
 -10   1   0   56.45    2.41
   1  10   0   49.53    2.37
  -1 -10   0   51.60    2.01
  -2 -10   0   78.46    2.94
  10  -2   0   84.84    3.30
  -2 -10   0   82.50    3.31
   2  10   0   81.66    2.98
 -10   2   0   80.21    3.31
   2  10   0   74.33    3.26
 -10   2   0   79.42    3.15
  10  -3   0   38.20    1.77
   3  10   0   33.17    1.76
  -3 -10   0   36.15    1.53
 -10   3   0   34.31    1.79
   3  10   0   38.86    1.58
  -3 -10   0   36.61    1.79
 -10   3   0   38.12    1.71
   4  10   0    6.57    0.65
   4  10   0    6.59    0.54
  10  -4   0    6.93    0.62
  -4 -10   0    6.52    0.53
  -4 -10   0    6.93    0.62
 -10   4   0    7.49    0.64
 -10   5   0   17.40    1.07
   5  10   0   17.97    1.03
  10  -5   0   17.18    1.04
   5  10   0   20.23    1.19
  10  -5   0   18.92    1.22
  -5 -10   0   18.44    1.15
  -6 -10   0   30.54    1.62
  10  -6   0   31.15    1.49
  10  -6   0   32.45    1.73
 -10   6   0   29.28    1.54
   6  10   0   29.49    1.51
   6  10   0   27.22    1.55
  -7 -10   0   20.44    1.23
   7  10   0   21.24    1.25
   7  10   0   17.94    1.16
  10  -7   0   16.82    1.24
 -10   7   0   21.66    1.40
  10  -7   0   18.08    1.04
  10  -8   0   93.42    3.66
   8  10   0   99.22    3.94
  -8 -10   0   97.24    4.77
 -10   8   0   92.37    3.73
  10  -8   0   95.06    4.08
 -10   8   0   96.09    3.93
 -10   9   0   23.51    1.45
  10  -9   0   22.19    1.53
  10  -9   0   24.82    1.22
 -10   9   0   25.00    1.21
   9  10   0   25.65    1.50
  -9 -10   0   25.17    1.47
  10 -10   0   91.66    4.05
  10 -10   0   89.54    3.47
 -10 -10   0   95.57    3.86
  10  10   0   98.54    4.01
 -10 -10   0   90.46    3.90
 -10  10   0   89.99    3.47
 -10  10   0   92.90    3.94
 -11 -10   0   13.44    1.01
 -11 -10   0   14.02    1.08
 -10  11   0   11.95    1.02
  10 -11   0   10.86    1.06
  10 -11   0   12.20    0.70
 -10  11   0   11.34    0.70
  11  10   0   12.68    1.10
 -11  -9   0    0.53    0.32
   9 -11   0    0.57    0.43
  -9  11   0    0.70    0.33
  -9  11   0    0.42    0.21
   9 -11   0    0.28    0.17
  11   9   0   -0.18    0.31
  11   8   0    8.98    0.86
  -8  11   0    8.64    0.85
 -11  -8   0    7.52    0.90
   8 -11   0    8.00    0.89
   8 -11   0    8.66    0.43
 -11  -8   0    9.55    0.78
 -11  -7   0    9.30    0.77
  11   7   0    9.70    0.95
  -7  11   0    9.51    0.87
 -11  -7   0    9.41    0.85
   7 -11   0   11.28    0.97
   6 -11   0   13.91    1.06
  11   6   0   11.56    1.03
  -6  11   0   14.07    1.04
 -11  -6   0   12.59    0.87
 -11  -6   0   13.10    0.96
  11   5   0  101.01    4.17
  -5  11   0   94.15    4.07
 -11  -5   0   98.92    4.00
 -11  -5   0  104.94    3.91
   5 -11   0  100.09    4.16
  -4  11   0   45.04    2.24
 -11  -4   0   51.45    2.10
 -11  -4   0   44.93    2.15
  11   4   0   49.96    2.35
   4 -11   0   44.27    2.27
 -11  -3   0  113.49    4.25
  -3  11   0  114.26    4.50
  11   3   0  111.20    4.52
   3 -11   0  110.81    4.51
 -11  -3   0  109.46    4.37
  11   2   0   71.17    3.05
 -11  -2   0   65.58    2.89
 -11  -2   0   71.07    2.79
  -2  11   0   69.70    3.13
   2 -11   0   67.99    3.03
  -1  11   0   19.86    1.37
 -11  -1   0   16.93    0.99
   1 -11   0   19.10    1.34
 -11  -1   0   18.34    1.12
 -11   0   0   -0.12    0.18
 -11   0   0    0.23    0.23
  11   0   0    0.01    0.24
   1  11   0   18.70    0.81
   1  11   0   18.88    1.20
  -1 -11   0   18.95    1.33
  -1 -11   0   16.45    0.78
  11  -1   0   19.07    1.17
 -11   1   0   17.34    1.02
 -11   1   0   19.88    1.17
  -2 -11   0   67.06    3.12
   2  11   0   69.53    3.01
   2  11   0   68.91    2.61
  11  -2   0   69.88    2.97
 -11   2   0   66.12    2.95
  -2 -11   0   69.77    2.58
 -11   2   0   71.03    2.83
  11  -3   0  111.68    4.42
  -3 -11   0  107.48    4.68
 -11   3   0  113.68    4.50
  -3 -11   0  108.25    4.11
   3  11   0  115.11    4.16
   3  11   0  112.22    4.51
 -11   3   0  118.27    4.36
 -11   4   0   50.12    2.33
   4  11   0   49.21    2.06
  -4 -11   0   46.32    1.99
   4  11   0   45.44    2.45
 -11   4   0   50.64    2.20
  11  -4   0   47.78    2.20
  11  -5   0  100.60    4.14
   5  11   0  100.03    3.85
 -11   5   0   98.22    3.94
  -5 -11   0   98.40    4.06
  11  -5   0   97.64    3.91
  -6 -11   0   11.95    0.93
   6  11   0   11.06    0.93
  11  -6   0   11.48    1.00
   6  11   0   11.91    0.88
  11  -6   0   13.39    0.89
  11  -7   0    9.86    0.75
  11  -7   0   10.72    0.97
 -11   7   0   11.68    0.90
   7  11   0    9.32    0.81
  -7 -11   0    9.32    0.84
   7  11   0   10.44    0.90
  11  -8   0    9.95    0.74
   8  11   0    8.81    0.84
  -8 -11   0    8.47    0.81
  11  -8   0    8.66    0.89
 -11   8   0    9.07    0.82
   8  11   0    9.49    1.00
  11  -9   0    0.74    0.38
  -9 -11   0    0.35    0.30
 -11   9   0    0.67    0.39
   9  11   0    0.23    0.32
  -9 -11   0    0.85    0.33
  11  -9   0    0.47    0.27
  10  11   0   13.74    1.13
 -11  10   0   12.34    1.20
 -10 -11   0   11.27    0.98
  11 -10   0   12.35    1.14
 -10 -11   0   13.15    1.07
  11 -10   0   12.95    0.81
 -11  10   0   14.31    1.10
 -11 -11   0    7.26    0.81
  11 -11   0    6.60    0.56
 -11 -11   0    5.95    0.72
 -11  11   0    5.75    0.86
  11  11   0    7.23    1.01
  11 -11   0    6.98    1.04
 -11  11   0    4.82    0.57
 -12 -11   0   13.24    1.08
 -11  12   0   13.84    0.76
  12  11   0   15.14    1.28
  11 -12   0   11.95    0.71
 -11  12   0   11.60    1.09
 -12 -11   0   13.25    1.14
  11 -12   0   12.03    1.16
 -12 -10   0    5.01    0.81
 -10  12   0    4.18    0.39
 -12 -10   0    5.35    0.77
  12  10   0    5.68    0.91
  10 -12   0    4.20    0.36
  10 -12   0    4.52    0.80
 -10  12   0    5.27    0.82
  -9  12   0   16.22    1.22
 -12  -9   0   14.72    1.14
  12   9   0   14.88    1.24
   9 -12   0   16.16    1.28
 -12  -9   0   15.74    1.10
  12   8   0   55.17    2.73
  -8  12   0   53.05    2.64
 -12  -8   0   52.98    2.56
 -12  -8   0   54.74    2.49
 -12  -7   0   20.72    1.49
  12   7   0   19.30    1.41
   7 -12   0   22.60    1.49
 -12  -7   0   20.02    1.22
  -7  12   0   20.68    1.40
  -6  12   0   23.76    1.47
   6 -12   0   21.55    1.48
 -12  -6   0   25.60    1.34
 -12  -6   0   21.73    1.37
  12   6   0   24.27    1.55
 -12  -5   0    4.50    0.59
   5 -12   0    4.25    0.69
  -5  12   0    2.99    0.57
  12   5   0    3.85    0.66
 -12  -5   0    4.62    0.68
 -12  -4   0   61.51    2.53
  12   4   0   55.71    2.76
 -12  -4   0   58.26    2.63
  -4  12   0   60.81    2.76
   4 -12   0   58.65    2.78
 -12  -3   0   56.77    2.33
  -3  12   0   51.43    2.51
 -12  -3   0   54.08    2.44
  12   3   0   49.75    2.54
   3 -12   0   54.83    2.58
  -2  12   0   23.46    1.44
   2 -12   0   24.10    1.47
 -12  -2   0   23.91    1.28
  12   2   0   27.06    1.55
 -12  -2   0   24.54    1.40
  -1  12   0   41.39    2.03
   1 -12   0   39.03    2.01
 -12  -1   0   40.18    1.80
  12   1   0   38.11    2.01
 -12  -1   0   36.80    1.91
  12   0   0  101.37    4.09
 -12   0   0   94.82    3.97
   0 -12   0   93.63    4.01
   0  12   0   99.73    4.06
 -12   0   0  100.02    3.81
   1  12   0   38.23    1.98
 -12   1   0   41.00    1.82
  -1 -12   0   38.78    1.98
 -12   1   0   37.52    1.93
   1  12   0   39.51    1.50
  -1 -12   0   36.81    1.48
  12  -1   0   39.71    2.00
  -2 -12   0   23.52    1.06
  12  -2   0   25.15    1.46
   2  12   0   24.63    1.09
 -12   2   0   23.33    1.29
 -12   2   0   23.32    1.41
  -2 -12   0   25.35    1.45
   2  12   0   24.42    1.47
 -12   3   0   54.62    2.41
 -12   3   0   53.86    2.55
  12  -3   0   56.34    2.77
   3  12   0   55.17    2.56
  -3 -12   0   52.21    2.51
   3  12   0   55.12    2.20
   4  12   0   57.79    2.76
  -4 -12   0   61.54    2.78
  12  -4   0   62.52    2.76
   4  12   0   61.82    2.50
 -12   4   0   64.13    2.68
  -4 -12   0   58.71    2.44
   5  12   0    5.26    0.76
  12  -5   0    4.10    0.72
   5  12   0    3.46    0.53
  12  -5   0    3.86    0.62
  -5 -12   0    5.03    0.73
  12  -6   0   22.20    1.49
 -12   6   0   25.61    1.43
  12  -6   0   24.95    1.39
   6  12   0   24.25    1.34
   6  12   0   22.02    1.43
  -6 -12   0   23.02    1.44
  -7 -12   0   20.42    1.34
   7  12   0   22.58    1.33
  12  -7   0   21.97    1.47
   7  12   0   21.46    1.41
 -12   7   0   22.51    1.36
  12  -7   0   20.27    1.24
   8  12   0   55.71    2.67
  12  -8   0   55.04    2.45
  -8 -12   0   54.23    2.65
  12  -8   0   54.02    2.76
 -12   8   0   57.99    2.65
   8  12   0   59.20    2.64
 -12   9   0   16.12    1.20
  12  -9   0   15.68    1.01
  -9 -12   0   16.35    1.17
  -9 -12   0   16.64    1.21
  12  -9   0   15.64    1.32
   9  12   0   15.54    1.20
 -12  10   0    6.06    0.88
 -10 -12   0    4.92    0.78
 -10 -12   0    5.07    0.81
  12 -10   0    4.82    0.85
  12 -10   0    5.30    0.56
  10  12   0    3.98    0.74
  12 -11   0   13.68    0.89
 -11 -12   0   14.32    1.16
  11  12   0   14.71    1.25
 -11 -12   0   14.59    1.20
  12 -11   0   15.03    1.28
 -12  11   0   12.68    1.18
 -12 -12   0   41.87    2.17
 -12  12   0   36.04    2.21
  12 -12   0   41.06    1.74
 -12 -12   0   39.00    2.23
  12  12   0   40.09    2.29
 -12  13   0   27.03    1.82
  12 -13   0   26.09    1.87
 -13 -12   0   29.87    1.74
 -13 -12   0   26.11    1.77
 -11  13   0   41.63    2.40
  13  11   0   45.75    2.51
  11 -13   0   43.68    1.79
 -13 -11   0   42.10    2.22
 -13 -11   0   40.26    2.29
  11 -13   0   41.43    2.44
 -10  13   0    0.27    0.39
 -13 -10   0    0.26    0.42
  10 -13   0    0.04    0.40
  13  10   0    0.64    0.50
 -13 -10   0    0.41    0.42
  -9  13   0    7.68    0.87
 -13  -9   0    7.43    0.81
  13   9   0    8.39    1.16
   9 -13   0    7.24    0.85
 -13  -9   0    7.06    0.85
   8 -13   0   19.81    1.49
  -8  13   0   20.39    1.44
 -13  -8   0   20.11    1.27
 -13  -8   0   20.41    1.38
  13   8   0   19.35    1.45
   7 -13   0    6.66    0.80
  13   7   0    6.02    0.89
 -13  -7   0    5.61    0.80
 -13  -7   0    7.79    0.74
  -7  13   0    7.73    1.01
  13   6   0   40.34    2.25
 -13  -6   0   39.70    2.30
   6 -13   0   39.53    2.22
  -6  13   0   41.39    2.19
 -13  -6   0   43.83    2.00
 -13  -5   0    7.00    0.68
 -13  -5   0    7.44    0.75
  13   5   0    7.11    0.83
  -5  13   0    6.59    0.75
   5 -13   0    6.59    0.77
 -13  -4   0   -0.20    0.25
  13   4   0    0.01    0.36
  -4  13   0    0.54    0.35
 -13  -4   0    0.36    0.27
   4 -13   0    0.15    0.32
 -13  -3   0    1.30    0.39
  -3  13   0    0.34    0.34
  13   3   0    0.51    0.38
 -13  -3   0    0.67    0.31
   3 -13   0    1.04    0.42
  13   2   0   17.42    1.29
   2 -13   0   18.75    1.30
  -2  13   0   18.31    1.29
 -13  -2   0   19.86    1.25
 -13  -2   0   19.87    1.13
   1 -13   0   38.44    2.04
  13   1   0   39.65    2.09
  -1  13   0   38.83    2.06
 -13  -1   0   37.67    1.97
 -13  -1   0   40.57    1.84
  13   0   0   -0.29    0.28
 -13   0   0   -0.03    0.27
 -13   0   0    0.15    0.25
   0 -13   0    0.22    0.35
   0  13   0   -0.01    0.23
   1  13   0   40.48    1.51
 -13   1   0   41.67    1.90
  -1 -13   0   37.65    1.50
  13  -1   0   41.14    2.11
 -13   1   0   39.44    2.04
   1  13   0   41.04    2.10
  -1 -13   0   39.38    2.05
  -2 -13   0   17.31    0.87
   2  13   0   18.65    0.91
 -13   2   0   18.37    1.13
   2  13   0   19.72    1.30
  -2 -13   0   18.11    1.25
  13  -2   0   19.68    1.30
 -13   2   0   20.94    1.32
 -13   3   0    0.78    0.30
   3  13   0    0.95    0.37
  -3 -13   0    1.17    0.45
   3  13   0    1.11    0.30
  13  -3   0    0.92    0.43
 -13   3   0    0.95    0.39
  13  -4   0    0.38    0.27
 -13   4   0    0.36    0.25
   4  13   0   -0.04    0.24
   4  13   0    0.36    0.26
  -4 -13   0    0.10    0.25
  -4 -13   0    0.26    0.26
  13  -5   0    6.19    0.72
   5  13   0    7.93    0.67
 -13   5   0    7.43    0.74
  -5 -13   0    7.86    0.81
  13  -5   0    7.06    0.83
   5  13   0    7.13    0.80
   6  13   0   40.14    2.16
 -13   6   0   40.60    2.06
  -6 -13   0   37.28    2.08
  13  -6   0   40.61    2.22
   6  13   0   41.63    1.96
  13  -6   0   43.71    2.07
  13  -7   0    6.92    0.86
 -13   7   0    5.93    0.71
   7  13   0    6.92    0.85
   7  13   0    5.47    0.80
  13  -7   0    6.21    0.69
  -7 -13   0    6.11    0.74
  13  -8   0   21.60    1.54
  13  -8   0   19.36    1.31
  -8 -13   0   20.25    1.41
   8  13   0   22.68    1.48
   8  13   0   20.85    1.36
 -13   8   0   20.41    1.37
  13  -9   0    8.18    0.73
  -9 -13   0    6.64    0.96
  -9 -13   0    7.02    0.83
   9  13   0    7.58    0.99
 -13   9   0    7.23    0.81
  13  -9   0    5.83    0.95
 -10 -13   0    0.31    0.37
  13 -10   0    0.66    0.45
  13 -10   0    0.45    0.33
  10  13   0    0.24    0.46
 -10 -13   0    0.01    0.37
 -13  10   0    0.40    0.40
 -11 -13   0   45.27    2.33
  11  13   0   43.53    2.37
 -13  11   0   45.51    2.38
  13 -11   0   41.51    1.94
 -11 -13   0   43.40    2.35
  13 -11   0   38.97    2.38
  12  13   0   26.44    1.88
 -12 -13   0   29.83    1.87
  13 -12   0   26.96    1.38
 -12 -13   0   29.97    1.81
 -13  12   0   26.19    1.82
  13 -12   0   27.51    1.91
  13  13   0    1.99    0.71
 -13 -13   0    2.91    0.71
 -13  13   0    2.35    0.68
 -13 -13   0    2.04    0.62
  13 -13   0    1.41    0.68
  14  13   0    3.43    0.92
 -14 -13   0    3.51    0.74
  13 -14   0    2.96    0.81
 -14 -13   0    3.71    1.16
 -13  14   0    4.32    0.87
 -14 -12   0    6.39    1.01
  12 -14   0    4.36    1.01
  14  12   0    5.11    0.95
 -12  14   0    4.68    0.96
 -14 -12   0    5.95    0.92
  14  11   0    0.49    0.51
 -14 -11   0   -0.22    0.44
  11 -14   0    0.20    0.43
 -11  14   0   -0.28    0.47
 -14 -11   0    0.28    0.42
 -14 -10   0    9.72    0.93
  14  10   0    8.45    1.22
  10 -14   0   10.85    1.09
 -14 -10   0    8.60    1.03
 -10  14   0    9.62    1.03
  14   9   0    2.43    0.71
 -14  -9   0    2.44    0.62
   9 -14   0    1.79    0.76
 -14  -9   0    2.09    0.55
   8 -14   0    0.27    0.37
  -8  14   0    0.49    0.39
 -14  -8   0    0.40    0.42
 -14  -8   0   -0.27    0.33
  14   8   0   -0.31    0.38
   7 -14   0    1.22    0.50
 -14  -7   0    2.13    0.57
  -7  14   0    1.66    0.50
 -14  -7   0    2.03    0.51
  14   7   0    1.20    0.58
   6 -14   0   76.02    3.57
 -14  -6   0   75.34    3.39
  14   6   0   79.97    3.65
  -6  14   0   76.34    3.52
  14   5   0   -0.30    0.40
   5 -14   0    0.81    0.47
 -14  -5   0    0.35    0.30
 -14  -5   0    0.82    0.37
  -5  14   0    0.22    0.38
 -14  -4   0   51.59    2.29
  14   4   0   50.57    2.63
   4 -14   0   50.00    2.57
 -14  -4   0   47.67    2.42
  -4  14   0   50.05    2.55
 -14  -3   0   35.58    1.72
  14   3   0   32.85    1.97
  -3  14   0   33.04    1.92
   3 -14   0   34.70    1.97
 -14  -2   0   15.17    0.97
  -2  14   0   13.34    1.11
 -14  -2   0   13.80    1.23
  14   2   0   14.49    1.20
   2 -14   0   13.68    1.11
 -14  -1   0    0.09    0.31
   1 -14   0    0.13    0.30
  14   1   0    0.48    0.34
 -14  -1   0    0.81    0.36
  -1  14   0    0.22    0.28
  14   0   0   57.83    2.79
   0 -14   0   57.67    2.76
 -14   0   0   56.09    2.50
   0  14   0   56.98    2.75
   1  14   0    0.80    0.37
 -14   1   0    0.39    0.32
 -14   1   0    1.13    0.40
  -1 -14   0    0.76    0.37
  14  -1   0    0.33    0.40
   2  14   0   14.39    0.73
  -2 -14   0   14.49    0.71
 -14   2   0   13.25    1.07
  -2 -14   0   14.73    1.14
   2  14   0   14.83    1.15
  14  -2   0   12.85    1.06
   3  14   0   33.19    1.48
   3  14   0   31.07    1.87
  -3 -14   0   34.39    1.89
 -14   3   0   35.22    1.91
 -14   3   0   32.67    1.73
  14  -3   0   32.02    1.84
  -4 -14   0   49.73    2.14
  -4 -14   0   52.11    2.58
   4  14   0   53.36    2.22
  14  -4   0   53.92    2.55
   4  14   0   49.64    2.57
 -14   4   0   54.41    2.46
  -5 -14   0   -0.09    0.31
   5  14   0    0.52    0.33
   5  14   0    0.15    0.32
  14  -5   0    0.16    0.37
  14  -5   0    0.32    0.35
 -14   5   0    0.46    0.38
   6  14   0   83.85    3.38
  -6 -14   0   82.79    3.64
 -14   6   0   78.56    3.48
  14  -6   0   81.10    3.50
   6  14   0   83.95    3.67
  14  -6   0   75.96    3.66
  -7 -14   0    1.71    0.52
 -14   7   0    2.43    0.59
   7  14   0    2.22    0.63
  14  -7   0    1.94    0.53
   7  14   0    1.84    0.73
  14  -7   0    1.33    0.55
  14  -8   0    0.04    0.41
   8  14   0    0.15    0.36
  14  -8   0    0.02    0.38
  -8 -14   0    0.25    0.40
   8  14   0   -0.10    0.38
 -14   8   0    0.85    0.39
 -14   9   0    2.38    0.59
   9  14   0    2.72    0.65
  -9 -14   0    2.07    0.60
  14  -9   0    2.78    0.75
  14  -9   0    2.91    0.57
 -14  10   0    8.71    0.94
  14 -10   0    8.87    1.10
 -10 -14   0    7.86    0.96
 -10 -14   0    9.93    1.03
  14 -10   0    9.33    0.84
  10  14   0    8.93    1.10
  14 -11   0    0.00    0.36
  11  14   0    0.23    0.55
 -14  11   0   -0.13    0.42
 -11 -14   0    0.05    0.46
  14 -11   0    0.68    0.50
 -11 -14   0   -0.05    0.47
 -12 -14   0    4.11    0.85
 -14  12   0    6.38    0.96
  14 -12   0    4.87    0.65
  14 -12   0    3.35    0.82
 -12 -14   0    4.32    0.87
  12  14   0    4.87    0.92
 -14  13   0    4.08    0.80
 -13 -14   0    3.83    0.85
  14 -13   0    3.66    0.92
  13  14   0    4.84    0.93
 -13 -14   0    2.86    0.77
 -15 -12   0    0.06    0.52
  12 -15   0    0.41    0.59
  15  12   0    0.10    0.64
 -12  15   0    0.36    0.53
 -15 -12   0    0.32    0.57
  11 -15   0   21.96    1.71
 -15 -11   0   19.79    1.56
 -11  15   0   22.08    1.68
  15  11   0   21.69    1.78
 -15 -11   0   22.20    1.53
 -15 -10   0   12.51    1.18
  15  10   0   13.48    1.32
  10 -15   0   12.22    1.28
 -10  15   0   13.96    1.24
 -15 -10   0   13.98    1.17
  15   9   0   38.11    2.28
  -9  15   0   35.31    2.12
   9 -15   0   32.60    2.12
 -15  -9   0   36.76    1.96
 -15  -9   0   34.05    2.04
 -15  -8   0    1.78    0.53
 -15  -8   0    1.21    0.50
  15   8   0    2.37    0.79
   8 -15   0    1.29    0.51
  -8  15   0    1.12    0.53
   7 -15   0    7.31    0.92
 -15  -7   0    7.14    0.87
  15   7   0    8.34    1.43
  -7  15   0    7.34    0.89
 -15  -7   0    8.16    0.82
 -15  -6   0    3.41    0.63
   6 -15   0    3.73    0.79
  -6  15   0    4.09    0.79
 -15  -6   0    4.27    0.75
  15   6   0    2.75    0.71
   5 -15   0   24.97    1.69
 -15  -5   0   25.69    1.46
  -5  15   0   24.09    1.66
 -15  -5   0   27.01    1.62
  15   5   0   22.96    1.68
   4 -15   0    1.39    0.48
 -15  -4   0    1.30    0.46
  15   4   0    1.64    0.50
  -4  15   0    1.91    0.58
  15   3   0   12.67    1.20
   3 -15   0   12.58    1.11
 -15  -3   0   12.73    1.06
  -3  15   0   11.13    1.05
  -2  15   0    4.58    0.77
 -15  -2   0    4.75    0.77
   2 -15   0    6.39    0.79
  15   2   0    7.48    1.09
 -15  -2   0    7.33    0.83
 -15  -1   0   64.77    3.03
   1 -15   0   64.26    3.13
  15   1   0   66.67    3.19
  -1  15   0   67.20    3.15
 -15   0   0    0.35    0.35
 -15   0   0    0.36    0.28
   0 -15   0    0.21    0.37
   0  15   0    0.00    0.30
  15   0   0    0.25    0.44
   1  15   0   63.16    3.07
 -15   1   0   65.96    3.05
 -15   1   0   68.09    2.84
  15  -1   0   61.71    3.06
  -1 -15   0   63.25    3.05
   2  15   0    5.52    0.42
  15  -2   0    5.99    0.85
  -2 -15   0    6.67    0.94
   2  15   0    5.10    0.82
 -15   2   0    6.28    0.69
  -2 -15   0    4.87    0.41
 -15   2   0    5.73    0.90
   3  15   0   12.81    0.75
 -15   3   0   12.13    1.07
   3  15   0   10.33    1.01
  -3 -15   0   14.22    1.14
 -15   3   0   11.38    0.95
  -3 -15   0   11.68    0.78
  15  -3   0   12.49    1.09
  15  -4   0    2.05    0.56
   4  15   0    2.17    0.58
  -4 -15   0    1.83    0.57
 -15   4   0    1.74    0.49
  -4 -15   0    1.46    0.39
  15  -4   0    1.33    0.46
   4  15   0    2.07    0.40
  -5 -15   0   23.14    1.60
   5  15   0   27.38    1.39
  15  -5   0   26.97    1.75
   5  15   0   26.87    1.71
  15  -5   0   24.00    1.57
 -15   5   0   23.72    1.51
  -6 -15   0    3.76    0.73
  15  -6   0    3.05    0.67
   6  15   0    3.93    0.61
   6  15   0    3.17    0.77
  15  -6   0    2.65    0.66
 -15   6   0    2.67    0.66
   7  15   0    6.84    1.00
 -15   7   0    8.58    0.89
  15  -7   0    7.41    0.82
  -7 -15   0    7.59    0.88
  15  -7   0    7.40    0.91
   7  15   0    7.94    0.86
   8  15   0    1.55    0.52
   8  15   0    1.30    0.59
 -15   8   0    1.36    0.54
  15  -8   0    1.79    0.56
  -8 -15   0    1.65    0.53
  15  -8   0    2.58    0.67
   9  15   0   34.45    1.98
  -9 -15   0   32.72    2.01
  15  -9   0   36.28    2.18
  15  -9   0   32.82    1.84
 -15   9   0   33.43    1.97
 -15  10   0   11.85    1.40
 -10 -15   0   12.23    1.37
  10  15   0   11.69    1.15
  15 -10   0   12.89    1.02
  15 -10   0   12.63    1.29
 -10 -15   0   13.96    1.23
 -15  11   0   16.42    1.44
  11  15   0   20.04    1.52
  15 -11   0   19.70    1.29
 -11 -15   0   22.33    1.60
  15 -11   0   19.78    1.63
 -11 -15   0   20.87    1.59
  15 -12   0   -0.18    0.50
 -15  12   0   -0.14    0.45
 -12 -15   0   -0.98    0.48
  12  15   0   -0.31    0.57
 -16 -10   0   -0.33    0.50
 -16 -10   0    0.34    0.55
  16  10   0   -0.28    0.59
  10 -16   0    0.65    0.58
 -10  16   0    0.65    0.50
  16   9   0    2.09    0.73
 -16  -9   0    3.49    0.79
  -9  16   0    2.61    0.71
 -16  -9   0    2.76    0.62
   9 -16   0    1.98    0.66
  16   8   0    2.23    0.72
 -16  -8   0    1.46    0.56
   8 -16   0    2.64    0.79
 -16  -8   0    1.64    0.55
  -8  16   0    2.56    0.68
 -16  -7   0   82.65    3.50
   7 -16   0   79.15    3.89
 -16  -7   0   86.45    3.77
  16   7   0   81.94    3.97
  -7  16   0   76.13    3.79
  -6  16   0   27.77    1.88
   6 -16   0   29.07    1.92
 -16  -6   0   26.80    1.76
 -16  -6   0   27.63    1.61
  16   6   0   28.35    1.94
 -16  -5   0    0.16    0.43
   5 -16   0   -0.44    0.35
  -5  16   0    0.14    0.41
 -16  -5   0    0.50    0.39
  16   5   0    0.28    0.46
  16   4   0   66.73    3.34
 -16  -4   0   72.97    2.97
 -16  -4   0   65.61    3.12
  -4  16   0   60.13    3.23
 -16  -3   0    1.59    0.52
 -16  -3   0    1.58    0.49
  -2  16   0   25.57    1.74
  16   2   0   26.16    1.79
 -16  -2   0   24.31    1.61
 -16  -2   0   26.83    1.50
   2 -16   0   27.10    1.77
  -1  16   0   24.18    1.66
   1 -16   0   26.05    1.71
 -16  -1   0   25.57    1.63
  16   1   0   23.90    1.71
 -16  -1   0   26.14    1.48
 -16   0   0   10.76    0.88
 -16   0   0    7.05    0.87
   0  16   0    8.66    0.98
  16   0   0    7.87    1.13
   0 -16   0    7.77    0.93
  -1 -16   0   26.39    1.68
  16  -1   0   24.14    1.68
 -16   1   0   26.06    1.51
   1  16   0   25.26    1.72
 -16   1   0   23.47    1.61
 -16   2   0   26.92    1.76
 -16   2   0   27.86    1.60
   2  16   0   27.05    1.81
  -2 -16   0   29.42    1.81
   3  16   0    2.14    0.39
 -16   3   0    1.38    0.53
   3  16   0    1.78    0.58
  -3 -16   0    2.14    0.62
  16  -3   0    2.01    0.61
  -3 -16   0    2.18    0.38
 -16   3   0    1.48    0.52
   4  16   0   67.49    2.76
   4  16   0   69.56    3.34
 -16   4   0   71.64    3.13
  -4 -16   0   68.17    3.29
  16  -4   0   68.11    3.32
  16  -4   0   69.34    3.28
  16  -5   0   -0.21    0.45
  16  -5   0    0.54    0.46
   5  16   0   -0.03    0.34
   5  16   0    0.90    0.53
 -16   5   0    0.60    0.42
  -5 -16   0    0.63    0.44
  16  -6   0   27.32    1.83
 -16   6   0   25.62    1.64
  16  -6   0   29.41    1.76
   6  16   0   27.56    1.82
   6  16   0   27.38    1.53
  -6 -16   0   26.39    1.81
  16  -7   0   78.63    3.81
   7  16   0   80.19    3.80
   7  16   0   80.83    3.43
  16  -7   0   81.60    3.59
 -16   7   0   78.30    3.58
  16  -8   0    2.62    0.61
  -8 -16   0    2.09    0.68
   8  16   0    1.69    0.52
 -16   8   0    2.08    0.67
  16  -8   0    1.79    0.66
   9  16   0    3.59    0.73
 -16   9   0    2.84    0.76
  16  -9   0    1.77    0.68
  -9 -16   0    1.64    0.65
  16  -9   0    2.81    0.68
  16 -10   0    0.46    0.45
 -16  10   0   -0.61    0.48
  16 -10   0   -0.01    0.51
 -10 -16   0    0.14    0.51
  10  16   0    0.77    0.65
 -10 -16   0    0.98    0.54
  -9  17   0    0.88    0.61
  17   9   0    0.49    0.63
 -17  -9   0    1.50    0.63
   9 -17   0    1.32    0.72
 -17  -9   0    0.54    0.55
  17   8   0   11.69    1.55
 -17  -8   0   12.73    1.12
   8 -17   0   11.83    1.27
 -17  -8   0   12.80    1.21
  -8  17   0   11.48    1.33
 -17  -7   0    1.73    0.55
 -17  -7   0    1.36    0.60
   7 -17   0    1.23    0.56
  -7  17   0    2.15    0.68
  17   7   0    1.26    0.65
 -17  -6   0   -0.79    0.41
   6 -17   0    0.30    0.43
  17   6   0    0.55    0.61
  -6  17   0    0.14    0.43
 -17  -6   0    0.32    0.43
   5 -17   0    2.45    0.71
 -17  -5   0    1.20    0.56
 -17  -5   0    3.36    0.64
  -5  17   0    2.59    0.69
  17   5   0    2.99    0.77
 -17  -4   0   20.90    1.32
 -17  -4   0   20.01    1.50
  17   4   0   18.70    1.57
   4 -17   0   21.29    1.59
  -4  17   0   19.23    1.55
 -17  -3   0    0.81    0.48
  -3  17   0    1.17    0.58
  17   3   0    1.70    0.62
   3 -17   0    1.22    0.59
 -17  -3   0    2.28    0.55
 -17  -2   0   15.62    1.29
  -2  17   0   14.21    1.28
   2 -17   0   16.22    1.35
  17   2   0   17.67    1.52
 -17  -2   0   17.35    1.18
  17   1   0    9.83    1.29
   1 -17   0   11.20    1.08
 -17  -1   0   11.32    1.08
 -17  -1   0    9.69    0.91
  -1  17   0   10.85    1.14
 -17   0   0   -0.21    0.40
 -17   0   0   -0.28    0.32
   0  17   0    0.36    0.47
   0 -17   0   -0.53    0.37
  17   0   0    1.14    0.62
 -17   1   0   11.98    1.16
  -1 -17   0   10.49    1.07
   1  17   0   11.61    1.12
 -17   1   0   11.32    0.98
  17  -1   0   10.60    1.63
 -17   2   0   17.61    1.24
   2  17   0   16.82    1.37
  -2 -17   0   16.44    1.36
 -17   2   0   16.23    1.36
 -17   3   0    2.10    0.55
  -3 -17   0    1.58    0.54
   3  17   0    1.23    0.29
  17  -3   0    1.81    0.58
   3  17   0    1.84    0.63
 -17   4   0   19.44    1.36
   4  17   0   20.18    1.08
   4  17   0   17.36    1.52
  17  -4   0   18.88    1.53
  17  -4   0   19.06    1.50
  -4 -17   0   21.02    1.59
  17  -5   0    2.13    0.67
  -5 -17   0    3.10    0.71
   5  17   0    1.99    0.47
  17  -5   0    2.17    0.70
 -17   5   0    3.20    0.69
   5  17   0    2.07    0.61
  17  -6   0   -0.32    0.46
  17  -6   0    0.29    0.54
  -6 -17   0   -0.15    0.44
 -17   6   0    0.89    0.51
   6  17   0    0.19    0.43
   6  17   0    0.36    0.55
   7  17   0    1.31    0.56
  17  -7   0    1.21    0.60
  17  -7   0    1.55    0.75
 -17   7   0    2.55    0.69
   7  17   0    1.88    0.69
  -7 -17   0    1.03    0.62
  17  -8   0   11.30    1.17
 -17   8   0   11.91    1.20
  -8 -17   0   13.61    1.28
   8  17   0   11.07    1.12
  17  -8   0   10.38    1.26
   8  17   0   14.85    1.35
   9  17   0    0.98    0.63
  -9 -17   0    1.37    0.63
  17  -9   0    0.40    0.56
  17  -9   0    0.52    0.61
 -17   9   0    0.63    0.56
 -18  -6   0    0.09    0.48
   6 -18   0    0.61    0.48
 -18  -6   0   -0.18    0.55
  18   6   0   -0.15    0.62
  -6  18   0    0.60    0.51
 -18  -5   0    3.21    0.69
  18   5   0    3.28    0.89
   5 -18   0    2.87    0.77
 -18  -5   0    3.97    0.80
  -5  18   0    3.01    0.73
 -18  -4   0    2.42    0.60
  -4  18   0    2.46    0.76
  18   4   0    2.80    0.86
 -18  -4   0    1.43    0.62
   4 -18   0    1.65    0.59
   3 -18   0   12.32    1.26
 -18  -3   0   12.83    1.09
  -3  18   0   13.33    1.28
  18   3   0   14.99    1.51
 -18  -3   0   12.17    1.19
  -2  18   0    9.04    1.26
 -18  -2   0    8.49    0.90
   2 -18   0    7.99    1.17
 -18  -2   0    8.48    1.01
  18   2   0    9.94    1.42
  18   1   0   10.95    1.15
  -1  18   0    8.37    1.18
   1 -18   0    6.90    1.11
 -18  -1   0    8.80    1.05
 -18  -1   0    9.46    0.92
  18   0   0   13.83    1.40
   0  18   0   12.57    1.28
 -18   0   0   12.65    1.19
 -18   0   0   10.48    1.03
   0 -18   0   11.88    1.21
  -1 -18   0    9.91    1.10
   1  18   0    7.15    1.09
  18  -1   0   10.61    1.20
 -18   1   0   10.00    0.99
 -18   1   0    9.39    1.03
  -2 -18   0    8.16    1.16
 -18   2   0   10.38    1.04
   2  18   0   10.93    1.18
  18  -2   0    9.72    1.27
 -18   2   0   10.36    1.15
 -18   3   0   11.50    1.12
  -3 -18   0   14.42    1.28
   3  18   0   11.33    1.19
  18  -3   0   13.91    1.28
  18  -4   0    2.19    0.78
  18  -4   0    2.37    0.79
   4  18   0    1.55    0.61
  -4 -18   0    1.21    0.63
 -18   4   0    1.86    0.60
 -18   5   0    2.20    0.62
  -5 -18   0    3.46    0.79
  18  -5   0    1.93    0.72
  18  -5   0    4.05    0.90
   5  18   0    3.29    0.56
   5  18   0    2.74    0.81
  -6 -18   0    0.39    0.50
   6  18   0   -0.07    0.46
  18  -6   0    0.75    0.61
   6  18   0    0.25    0.48
  18  -6   0   -0.07    0.68
 -18   6   0    0.31    0.53
 -19  -3   0   22.86    1.48
 -19  -3   0   18.78    1.57
  -3  19   0   23.78    1.80
  19   3   0   24.25    1.95
   3 -19   0   23.32    1.77
 -19  -2   0    0.37    0.52
  -2  19   0   -0.22    0.49
   2 -19   0    0.12    0.46
  19   2   0   -0.04    0.62
 -19  -2   0   -0.79    0.55
 -19  -1   0    2.36    0.63
  -1  19   0    2.76    0.77
  19   1   0    2.41    0.75
 -19  -1   0    2.78    0.76
   1 -19   0    2.81    0.78
   0  19   0    0.52    0.61
  19   0   0   -0.49    0.60
 -19   0   0    0.17    0.49
   0 -19   0   -0.25    0.49
 -19   0   0   -0.05    0.52
   1  19   0    1.70    0.73
  -1 -19   0    3.24    0.87
 -19   1   0    1.38    0.58
  19  -1   0    2.75    0.87
 -19   1   0    2.41    0.76
  19  -2   0    0.28    0.58
 -19   2   0   -0.41    0.50
   2  19   0    0.74    0.59
  -2 -19   0   -0.29    0.46
   3  19   0   20.76    1.72
  19  -3   0   18.30    1.66
 -19   3   0   25.04    1.57
  -3 -19   0   22.65    1.75
  19  -3   0   23.32    1.80
   0   1  -1   -0.01    0.01
   0   1   1    0.01    0.01
   1   1  -1    0.15    0.05
   1  -1  -1    0.18    0.06
  -1   1  -1    0.12    0.04
  -1  -1  -1    0.11    0.04
   1   1  -1    0.10    0.04
  -1   1  -1    0.07    0.03
   1   1   1    0.12    0.03
   1   1   1    0.10    0.04
  -1  -1   1    0.21    0.05
  -1  -1   1    0.13    0.03
  -1   1   1    0.16    0.04
  -1   1   1    0.23    0.06
   1  -1   1    0.17    0.04
   1   1   1    0.20    0.05
  -1   1   1    0.16    0.04
   1  -1   1    0.11    0.03
   1  -2  -1    0.30    0.08
   1  -2  -1    0.21    0.04
   1  -2  -1    0.41    0.10
  -2  -1  -1    0.43    0.07
  -1   2  -1    0.35    0.08
  -1   2  -1    0.22    0.08
  -1   2  -1    0.21    0.04
   2   1  -1    0.32    0.08
   2   1  -1    0.28    0.08
  -2  -1  -1    0.35    0.08
  -2  -1  -1    0.26    0.07
   1  -2   1    0.25    0.04
  -1   2   1    0.37    0.09
  -2  -1   1    0.29    0.07
   2   1   1    0.28    0.08
   2   1   1    0.22    0.05
  -2  -1   1    0.33    0.06
   2   1   1    0.18    0.07
  -1   2   1    0.22    0.04
   1  -2   1    0.34    0.08
  -1   2   1    0.26    0.07
  -2  -1   1    0.20    0.07
   1  -2   1    0.42    0.09
   2   0  -1    0.02    0.04
  -2   0  -1    0.00    0.04
   0  -2  -1    0.00    0.03
   2   0  -1    0.00    0.03
  -2   0  -1    0.07    0.04
   0   2  -1    0.04    0.02
  -2   0  -1   -0.01    0.03
   0   2  -1    0.01    0.04
   2   0  -1   -0.01    0.03
   0  -2  -1    0.02    0.02
   0   2  -1    0.02    0.04
   0  -2  -1    0.07    0.04
  -2   0   1    0.02    0.02
   0  -2   1    0.03    0.03
   0   2   1    0.03    0.02
   0   2   1   -0.02    0.04
   0  -2   1    0.01    0.04
   0  -2   1    0.02    0.04
   2   0   1    0.02    0.04
  -2   0   1    0.01    0.03
   2   0   1   -0.01    0.03
   0   2   1    0.03    0.04
  -2   0   1   -0.01    0.03
  -1  -2  -1    0.27    0.06
   2  -1  -1    0.21    0.06
   1   2  -1    0.25    0.06
   1   2  -1    0.34    0.08
   2  -1  -1    0.31    0.07
   2  -1  -1    0.35    0.09
  -2   1  -1    0.29    0.08
   1   2  -1    0.26    0.06
  -1  -2  -1    0.30    0.08
  -1  -2  -1    0.35    0.07
  -2   1  -1    0.19    0.06
   2  -1   1    0.41    0.08
  -1  -2   1    0.31    0.06
   1   2   1    0.33    0.07
   2  -1   1    0.39    0.08
   1   2   1    0.29    0.08
  -2   1   1    0.34    0.07
  -2   1   1    0.39    0.09
   2  -1   1    0.26    0.07
   1   2   1    0.30    0.06
  -2   1   1    0.29    0.06
  -1  -2   1    0.36    0.07
  -1  -2   1    0.36    0.08
   2  -1   1    0.39    0.08
   2   2  -1    1.14    0.13
  -2  -2  -1    1.27    0.12
  -2  -2  -1    0.89    0.13
   2  -2  -1    1.18    0.13
  -2  -2  -1    1.19    0.14
  -2   2  -1    0.87    0.14
  -2   2  -1    1.26    0.11
   2  -2  -1    0.97    0.10
   2   2  -1    0.66    0.12
   2   2  -1    1.30    0.12
   2  -2  -1    1.21    0.15
  -2   2  -1    1.07    0.15
  -2   2   1    0.86    0.09
  -2   2   1    0.97    0.16
  -2  -2   1    1.01    0.15
   2   2   1    1.17    0.13
  -2   2   1    0.95    0.14
   2  -2   1    0.91    0.10
  -2  -2   1    0.99    0.11
  -2  -2   1    1.20    0.14
   2   2   1    1.23    0.12
   2  -2   1    1.02    0.15
   2   2   1    0.79    0.13
   2  -2   1    1.21    0.14
  -3  -2  -1    0.71    0.13
   3   2  -1    0.92    0.15
  -3  -2  -1    0.75    0.15
  -3  -2  -1    0.93    0.14
   2  -3  -1    0.83    0.14
   2  -3  -1    0.61    0.14
   2  -3  -1    0.62    0.08
   3   2  -1    0.75    0.15
  -2   3  -1    0.66    0.14
  -2   3  -1    0.72    0.15
  -3  -2  -1    0.85    0.13
  -2   3  -1    0.71    0.08
   2  -3   1    0.95    0.17
  -3  -2   1    0.61    0.11
  -3  -2   1    0.81    0.15
   3   2   1    0.47    0.12
  -2   3   1    0.52    0.08
   2  -3   1    0.59    0.08
  -2   3   1    0.49    0.13
   3   2   1    0.97    0.14
   2  -3   1    0.66    0.14
  -3  -2   1    0.60    0.12
  -3  -2   1    0.60    0.10
  -3  -1  -1    0.38    0.08
   1  -3  -1    0.22    0.04
   1  -3  -1    0.46    0.11
   3   1  -1    0.38    0.08
  -1   3  -1    0.41    0.11
   3   1  -1    0.41    0.10
  -1   3  -1    0.24    0.04
  -3  -1  -1    0.28    0.08
   3   1  -1    0.23    0.09
   1  -3  -1    0.22    0.04
   1  -3  -1    0.43    0.11
  -1   3  -1    0.22    0.08
  -3  -1  -1    0.22    0.09
  -3  -1   1    0.31    0.09
  -3  -1   1    0.27    0.07
   3   1   1    0.30    0.08
  -1   3   1    0.22    0.09
   3   1   1    0.34    0.10
   1  -3   1    0.22    0.04
   1  -3   1    0.21    0.09
   1  -3   1    0.35    0.11
  -3  -1   1    0.17    0.08
   3   1   1    0.26    0.08
  -1   3   1    0.36    0.11
   0   3  -1    3.24    0.24
   3   0  -1    3.38    0.25
   0  -3  -1    3.66    0.25
   0  -3  -1    4.02    0.27
   0   3  -1    4.05    0.27
   0  -3  -1    3.32    0.19
   3   0  -1    3.00    0.19
  -3   0  -1    4.30    0.24
  -3   0  -1    3.07    0.22
  -3   0  -1    3.55    0.25
   0   3  -1    2.77    0.17
   0  -3   1    3.55    0.25
   3   0   1    4.25    0.27
   0   3   1    3.54    0.18
   0   3   1    3.76    0.26
  -3   0   1    3.20    0.20
   0  -3   1    3.74    0.27
   0  -3   1    3.20    0.19
  -3   0   1    3.56    0.25
   3   0   1    3.35    0.23
  -3   1  -1    0.23    0.09
   1   3  -1    0.16    0.06
   3  -1  -1    0.20    0.07
  -1  -3  -1    0.40    0.10
   3  -1  -1    0.28    0.08
   1   3  -1    0.34    0.10
  -3   1  -1    0.45    0.10
  -3   1  -1    0.19    0.08
   3  -1  -1    0.43    0.11
  -1  -3  -1    0.27    0.07
   1   3  -1    0.30    0.09
  -1  -3  -1    0.21    0.08
  -3   1   1    0.42    0.10
   3  -1   1    0.29    0.08
  -3   1   1    0.42    0.12
   3  -1   1    0.29    0.08
   1   3   1    0.22    0.08
   1   3   1    0.29    0.07
  -1  -3   1    0.29    0.08
  -3   1   1    0.32    0.08
  -1  -3   1    0.35    0.11
   1   3   1    0.29    0.10
  -1  -3   1    0.21    0.07
   3  -1   1    0.22    0.08
   2   3  -1    0.60    0.12
  -3   2  -1    0.66    0.11
  -2  -3  -1    0.44    0.11
   2   3  -1    0.61    0.13
   3  -2  -1    0.49    0.12
   3  -2  -1    0.86    0.17
  -3   2  -1    0.62    0.14
   2   3  -1    0.50    0.11
  -2  -3  -1    0.71    0.14
   3  -2  -1    0.61    0.11
  -2  -3  -1    0.78    0.13
  -2  -3   1    0.78    0.13
  -3   2   1    0.84    0.16
   3  -2   1    0.51    0.13
   3  -2   1    0.62    0.11
   2   3   1    0.57    0.11
  -2  -3   1    0.82    0.15
   2   3   1    0.84    0.13
   2   3   1    0.69    0.13
   3  -2   1    0.83    0.15
  -3   2   1    0.57    0.12
  -2  -3   1    0.75    0.12
   3  -2   1    0.60    0.13
  -3   2   1    0.64    0.11
   3  -3  -1    0.06    0.08
  -3   3  -1   -0.04    0.07
  -3  -3  -1   -0.02    0.06
   3   3  -1    0.01    0.07
   3  -3  -1   -0.08    0.09
   3  -3  -1    0.04    0.05
   3   3  -1    0.09    0.08
  -3  -3  -1    0.07    0.07
  -3   3  -1    0.02    0.06
   3  -3  -1    0.04    0.08
  -3  -3  -1   -0.07    0.06
  -3   3  -1    0.04    0.08
   3   3  -1    0.01    0.06
  -3   3   1   -0.04    0.07
  -3  -3   1    0.02    0.08
   3  -3   1   -0.01    0.07
   3   3   1   -0.02    0.05
  -3  -3   1    0.01    0.06
   3   3   1    0.07    0.08
   3  -3   1    0.13    0.08
  -3   3   1   -0.04    0.05
  -3  -3   1    0.04    0.06
   3   3   1    0.02    0.09
   3  -3   1    0.01    0.05
  -4  -3  -1    1.10    0.20
  -3   4  -1    1.02    0.11
   3  -4  -1    1.55    0.27
  -3   4  -1    1.24    0.23
  -3   4  -1    1.06    0.21
   4   3  -1    1.36    0.21
   3  -4  -1    0.97    0.11
   3  -4  -1    1.44    0.26
  -4  -3  -1    1.17    0.19
  -4  -3  -1    1.15    0.19
   3  -4  -1    1.37    0.23
  -4  -3  -1    1.16    0.19
  -4  -3   1    1.29    0.21
   3  -4   1    1.04    0.12
  -4  -3   1    1.07    0.17
  -4  -3   1    0.99    0.19
   4   3   1    1.16    0.18
   3  -4   1    0.83    0.19
  -4  -3   1    0.80    0.14
  -3   4   1    0.96    0.12
  -4  -2  -1    1.56    0.18
  -2   4  -1    1.09    0.20
   4   2  -1    1.51    0.23
   2  -4  -1    1.20    0.10
   4   2  -1    1.79    0.20
   2  -4  -1    1.29    0.22
  -2   4  -1    1.54    0.24
   2  -4  -1    1.04    0.18
  -4  -2  -1    1.27    0.20
  -2   4  -1    1.40    0.10
  -4  -2  -1    1.78    0.18
   2  -4   1    1.33    0.10
   4   2   1    1.42    0.17
  -2   4   1    1.53    0.23
   4   2   1    1.65    0.24
  -4  -2   1    1.48    0.22
  -4  -2   1    1.56    0.16
  -4  -2   1    1.48    0.15
  -4  -2   1    1.36    0.17
   2  -4   1    1.82    0.22
   2  -4   1    1.39    0.22
  -2   4   1    1.58    0.25
   4   2   1    1.66    0.16
  -2   4   1    1.29    0.10
   4   1  -1    1.30    0.13
   4   1  -1    1.12    0.19
   1  -4  -1    1.41    0.22
   1  -4  -1    1.55    0.24
  -1   4  -1    1.64    0.24
  -4  -1  -1    1.35    0.20
  -4  -1  -1    1.76    0.17
   4   1  -1    1.54    0.18
  -4  -1  -1    1.51    0.17
   1  -4  -1    1.25    0.07
  -1   4  -1    1.04    0.18
  -1   4  -1    1.12    0.07
  -1   4   1    1.33    0.21
   4   1   1    1.14    0.19
   4   1   1    1.50    0.15
  -4  -1   1    1.41    0.17
   4   1   1    1.20    0.14
  -4  -1   1    1.15    0.19
   1  -4   1    1.86    0.20
  -4  -1   1    0.99    0.14
   1  -4   1    1.62    0.22
  -1   4   1    1.76    0.22
  -4   0  -1    0.07    0.08
   0   4  -1    0.06    0.07
   4   0  -1    0.18    0.09
   0   4  -1    0.05    0.04
   4   0  -1    0.07    0.09
   4   0  -1    0.24    0.07
   0  -4  -1    0.19    0.08
   0   4  -1    0.12    0.10
   0  -4  -1    0.22    0.10
   0  -4  -1    0.08    0.04
  -4   0  -1    0.12    0.07
  -4   0  -1    0.06    0.06
   0  -4   1    0.15    0.09
   0   4   1    0.08    0.04
   4   0   1    0.08    0.06
   0  -4   1    0.07    0.04
   4   0   1    0.09    0.08
  -4   0   1    0.13    0.09
   4   0   1    0.10    0.07
  -4   0   1    0.00    0.05
   0  -4   1    0.05    0.08
   0   4   1    0.05    0.07
  -4   0   1    0.15    0.08
   0   4   1    0.13    0.09
  -4   1  -1    1.45    0.17
  -1  -4  -1    1.27    0.13
  -1  -4  -1    1.25    0.19
   1   4  -1    1.31    0.14
  -1  -4  -1    1.10    0.18
   4  -1  -1    1.45    0.22
  -4   1  -1    1.21    0.19
  -4   1  -1    1.45    0.17
   1   4  -1    1.96    0.20
   4  -1  -1    1.03    0.15
   1   4  -1    1.20    0.19
   4  -1  -1    1.17    0.19
   4  -1   1    1.28    0.19
   1   4   1    1.73    0.19
   1   4   1    1.64    0.15
  -4   1   1    1.21    0.18
   4  -1   1    1.79    0.18
  -4   1   1    1.97    0.21
   1   4   1    1.49    0.19
  -1  -4   1    1.26    0.13
   4  -1   1    1.14    0.18
  -1  -4   1    1.37    0.20
  -4   1   1    1.39    0.15
  -1  -4   1    1.33    0.19
  -2  -4  -1    1.51    0.18
  -4   2  -1    1.25    0.20
  -2  -4  -1    1.16    0.17
   2   4  -1    1.72    0.18
  -2  -4  -1    1.50    0.22
   4  -2  -1    1.26    0.18
   2   4  -1    1.93    0.22
   4  -2  -1    1.60    0.25
   2   4  -1    1.22    0.17
  -4   2  -1    1.33    0.19
   4  -2  -1    1.39    0.16
  -2  -4   1    1.35    0.15
   2   4   1    1.35    0.21
   2   4   1    1.29    0.18
   4  -2   1    1.34    0.19
   4  -2   1    1.24    0.19
   2   4   1    1.85    0.21
   4  -2   1    1.76    0.21
  -2  -4   1    1.72    0.20
  -4   2   1    1.37    0.19
  -4   2   1    1.48    0.24
  -4   2   1    1.08    0.18
  -2  -4   1    1.26    0.19
   3   4  -1    1.03    0.20
   3   4  -1    1.05    0.20
   3   4  -1    1.22    0.20
   4  -3  -1    1.29    0.23
   4  -3  -1    1.13    0.17
  -3  -4  -1    1.33    0.20
   4  -3  -1    1.35    0.21
  -3  -4  -1    1.23    0.21
  -3  -4  -1    1.01    0.17
  -4   3  -1    1.09    0.16
   3   4   1    1.16    0.19
   4  -3   1    1.06    0.22
   4  -3   1    1.45    0.23
   4  -3   1    0.95    0.19
   4  -3   1    0.75    0.14
  -4   3   1    1.00    0.15
   3   4   1    0.72    0.16
   3   4   1    1.34    0.22
  -4   3   1    0.90    0.17
  -3  -4   1    0.83    0.16
  -3  -4   1    0.85    0.16
  -3  -4   1    1.46    0.24
  -4   4  -1    6.36    0.36
   4  -4  -1    6.03    0.44
   4  -4  -1    7.88    0.54
  -4  -4  -1    6.52    0.43
   4   4  -1    6.94    0.48
   4  -4  -1    7.81    0.54
   4  -4  -1    5.52    0.35
  -4   4  -1    6.29    0.45
   4   4  -1    7.17    0.47
   4   4  -1    6.87    0.43
  -4  -4  -1    6.94    0.44
  -4  -4  -1    5.58    0.41
  -4   4   1    5.40    0.35
  -4  -4   1    6.61    0.45
  -4  -4   1    7.45    0.48
   4  -4   1    6.57    0.37
   4  -4   1    7.22    0.51
   4   4   1    6.83    0.43
   4  -4   1    7.72    0.52
  -4   4   1    5.80    0.43
   4   4   1    7.31    0.47
  -4  -4   1    6.99    0.42
   4  -4   1    5.72    0.43
  -5  -4  -1    6.91    0.46
   5   4  -1    7.25    0.49
  -5  -4  -1    6.86    0.52
  -5  -4  -1    6.07    0.44
   4  -5  -1    6.25    0.34
   4  -5  -1    7.98    0.57
   5   4  -1    6.15    0.48
  -4   5  -1    6.31    0.49
  -4   5  -1    5.66    0.33
   4  -5  -1    7.10    0.54
   4  -5  -1    5.46    0.45
  -5  -4  -1    5.18    0.48
  -4   5  -1    6.96    0.53
   5   4   1    6.33    0.43
  -4   5   1    5.64    0.34
  -5  -4   1    7.78    0.51
  -4   5   1    5.90    0.46
   4  -5   1    7.00    0.52
  -5  -4   1    7.03    0.42
   4  -5   1    5.48    0.34
  -5  -4   1    5.98    0.50
   4  -5   1    6.05    0.47
  -5  -4   1    6.64    0.43
   5   4   1    5.05    0.44
   3  -5  -1    0.50    0.16
   3  -5  -1    0.48    0.08
   5   3  -1    0.81    0.19
  -3   5  -1    0.43    0.07
  -3   5  -1    0.71    0.18
  -5  -3  -1    0.45    0.14
  -5  -3  -1    0.61    0.16
  -3   5  -1    0.36    0.17
  -5  -3  -1    0.63    0.18
   3  -5  -1    0.58    0.18
   5   3  -1    0.50    0.16
  -5  -3  -1    0.45    0.13
   3  -5   1    0.50    0.16
  -5  -3   1    0.52    0.13
   3  -5   1    0.40    0.08
  -5  -3   1    0.40    0.15
  -5  -3   1    0.42    0.18
  -3   5   1    0.52    0.16
   5   3   1    0.84    0.20
  -3   5   1    0.56    0.09
  -5  -3   1    0.56    0.14
   5   3   1    0.59    0.14
   5   2  -1    0.27    0.13
   2  -5  -1    0.21    0.14
   5   2  -1    0.34    0.10
  -5  -2  -1    0.31    0.14
  -2   5  -1    0.56    0.19
  -5  -2  -1    0.45    0.13
  -5  -2  -1    0.54    0.14
  -2   5  -1    0.39    0.14
   2  -5  -1    0.38    0.15
   5   2  -1    0.36    0.11
   5   2   1    0.44    0.11
   5   2   1    0.30    0.12
   5   2   1    0.26    0.14
   2  -5   1    0.30    0.13
  -2   5   1    0.35    0.14
  -5  -2   1    0.55    0.16
  -2   5   1    0.34    0.15
  -5  -2   1    0.48    0.12
   2  -5   1    0.17    0.14
  -5  -2   1    0.28    0.14
  -1   5  -1    3.54    0.31
  -1   5  -1    4.31    0.36
   5   1  -1    3.03    0.28
  -5  -1  -1    2.96    0.27
   5   1  -1    3.41    0.32
   5   1  -1    3.40    0.25
  -5  -1  -1    3.52    0.28
   1  -5  -1    3.75    0.33
   1  -5  -1    3.37    0.30
  -5  -1  -1    2.73    0.29
  -5  -1   1    3.43    0.31
   1  -5   1    2.81    0.28
   5   1   1    3.19    0.31
   5   1   1    3.78    0.27
  -5  -1   1    3.18    0.25
  -1   5   1    4.65    0.38
   5   1   1    4.04    0.29
  -5  -1   1    4.19    0.33
  -1   5   1    3.87    0.33
   1  -5   1    4.16    0.35
   5   0  -1    5.88    0.42
   5   0  -1    6.19    0.41
  -5   0  -1    5.81    0.38
   0   5  -1    6.50    0.44
   0  -5  -1    5.83    0.41
   5   0  -1    5.76    0.34
   0  -5  -1    5.51    0.27
   0   5  -1    5.69    0.28
  -5   0  -1    7.32    0.42
  -5   0  -1    6.12    0.42
   0   5  -1    7.70    0.48
   0  -5  -1    7.22    0.47
   0  -5   1    5.08    0.39
  -5   0   1    5.55    0.34
  -5   0   1    5.46    0.40
   5   0   1    6.15    0.39
   0   5   1    6.28    0.44
   0  -5   1    5.48    0.28
   5   0   1    5.82    0.37
   0  -5   1    5.61    0.42
   5   0   1    6.14    0.43
   0   5   1    5.93    0.29
  -5   0   1    6.87    0.45
   0   5   1    6.34    0.45
  -1  -5  -1    4.02    0.32
  -1  -5  -1    3.49    0.23
   1   5  -1    3.21    0.23
  -5   1  -1    4.01    0.32
  -5   1  -1    3.41    0.28
  -5   1  -1    3.51    0.30
   5  -1  -1    4.02    0.33
   5  -1  -1    3.59    0.31
   1   5  -1    3.89    0.34
   5  -1  -1    3.18    0.25
   5  -1   1    3.83    0.32
  -5   1   1    2.76    0.28
   1   5   1    3.74    0.33
  -1  -5   1    2.64    0.21
   1   5   1    3.54    0.32
  -5   1   1    2.83    0.25
  -1  -5   1    2.93    0.28
   5  -1   1    3.75    0.30
  -1  -5   1    4.17    0.35
  -5   1   1    3.34    0.31
   1   5   1    3.09    0.23
   5  -1   1    2.95    0.27
   2   5  -1    0.32    0.11
  -5   2  -1    0.24    0.12
  -2  -5  -1    0.45    0.15
  -5   2  -1    0.33    0.11
   2   5  -1    0.12    0.13
   2   5  -1    0.32    0.14
   5  -2  -1    0.41    0.12
   5  -2  -1    0.47    0.16
   5  -2  -1    0.33    0.12
  -2  -5  -1    0.44    0.12
   5  -2   1    0.24    0.10
  -2  -5   1    0.26    0.10
   2   5   1    0.29    0.10
  -2  -5   1    0.46    0.13
  -5   2   1    0.36    0.16
   2   5   1    0.37    0.13
  -5   2   1    0.36    0.12
  -5   2   1    0.23    0.11
   2   5   1    0.34    0.14
   5  -2   1    0.31    0.11
   5  -2   1    0.29    0.12
  -2  -5   1    0.40    0.15
  -3  -5  -1    0.64    0.14
   3   5  -1    0.25    0.12
  -5   3  -1    0.44    0.16
  -3  -5  -1    0.63    0.17
  -3  -5  -1    0.46    0.15
   5  -3  -1    0.39    0.13
   5  -3  -1    0.38    0.13
  -5   3  -1    0.71    0.15
   3   5  -1    0.69    0.16
   5  -3  -1    0.56    0.19
  -5   3   1    0.59    0.18
   5  -3   1    0.56    0.18
   3   5   1    0.51    0.14
  -3  -5   1    0.54    0.18
   5  -3   1    0.53    0.16
   5  -3   1    0.41    0.15
   5  -3   1    0.59    0.15
  -3  -5   1    0.89    0.18
  -5   3   1    0.56    0.17
   3   5   1    0.55    0.16
  -5   3   1    0.44    0.12
   3   5   1    0.64    0.17
  -3  -5   1    0.49    0.13
  -4  -5  -1    6.91    0.46
   4   5  -1    6.47    0.45
   4   5  -1    6.07    0.46
   5  -4  -1    6.30    0.52
   4   5  -1    5.70    0.44
  -5   4  -1    5.79    0.38
   5  -4  -1    7.32    0.55
  -5   4  -1    5.85    0.48
   5  -4  -1    6.27    0.40
   5  -4  -1    5.94    0.45
  -4  -5  -1    6.46    0.46
  -4  -5  -1    6.68    0.45
  -5   4   1    6.14    0.47
   4   5   1    7.00    0.49
  -4  -5   1    6.39    0.43
   5  -4   1    5.35    0.44
   5  -4   1    7.95    0.55
   4   5   1    7.93    0.49
   5  -4   1    6.74    0.52
   4   5   1    6.87    0.48
  -5   4   1    5.27    0.37
  -4  -5   1    6.52    0.45
   5  -4   1    5.33    0.38
  -4  -5   1    6.79    0.49
   5   5  -1    0.31    0.17
   5  -5  -1    0.29    0.11
   5  -5  -1    0.02    0.18
  -5   5  -1    0.26    0.16
   5  -5  -1    0.38    0.19
  -5  -5  -1    0.28    0.16
  -5  -5  -1    0.32    0.15
   5   5  -1    0.28    0.15
   5  -5  -1    0.14    0.16
   5   5  -1    0.32    0.16
  -5   5  -1    0.17    0.11
  -5   5   1    0.36    0.18
   5   5   1    0.11    0.11
  -5   5   1    0.25    0.12
   5  -5   1    0.17    0.10
  -5  -5   1    0.18    0.15
   5  -5   1    0.17    0.17
  -5  -5   1    0.14    0.14
   5   5   1    0.22    0.16
  -5  -5   1    0.13    0.12
   5  -5   1    0.51    0.20
   5  -5   1    0.16    0.16
   5  -6  -1    1.80    0.19
  -6  -5  -1    2.10    0.31
  -5   6  -1    1.85    0.34
  -6  -5  -1    1.79    0.30
   6   5  -1    2.62    0.41
   5  -6  -1    2.34    0.39
  -6  -5  -1    2.20    0.30
  -5   6  -1    2.46    0.22
   6   5  -1    2.35    0.36
   5  -6  -1    1.43    0.31
  -6  -5  -1    2.45    0.30
  -6  -5   1    2.33    0.36
  -6  -5   1    2.52    0.37
  -6  -5   1    2.45    0.28
   5  -6   1    2.00    0.36
  -5   6   1    1.63    0.21
  -5   6   1    1.94    0.34
   5  -6   1    1.98    0.20
   5  -6   1    2.39    0.41
  -6  -5   1    2.38    0.28
   6   5   1    2.05    0.37
  -6  -4  -1    7.57    0.56
   4  -6  -1    9.50    0.68
   6   4  -1    8.09    0.61
  -6  -4  -1    9.02    0.55
   4  -6  -1    8.26    0.59
  -4   6  -1    7.34    0.39
   6   4  -1    8.08    0.63
  -4   6  -1    8.27    0.60
   4  -6  -1    9.86    0.68
  -4   6  -1    8.77    0.66
   4  -6  -1    7.96    0.40
  -6  -4  -1    9.31    0.57
  -6  -4  -1    8.89    0.56
  -6  -4   1    9.60    0.61
   6   4   1    8.41    0.60
  -6  -4   1    9.35    0.53
  -6  -4   1    7.85    0.57
   6   4   1    8.77    0.54
   4  -6   1    8.39    0.40
   4  -6   1    8.99    0.63
   4  -6   1    7.52    0.58
  -4   6   1    7.17    0.39
  -6  -4   1    7.86    0.58
  -4   6   1    8.44    0.60
  -3   6  -1    3.11    0.36
   3  -6  -1    2.61    0.16
   3  -6  -1    2.94    0.16
  -6  -3  -1    3.52    0.32
   6   3  -1    3.25    0.32
   6   3  -1    3.01    0.35
   3  -6  -1    3.46    0.39
  -3   6  -1    3.15    0.21
  -6  -3  -1    3.13    0.31
  -6  -3  -1    2.88    0.32
  -6  -3  -1    2.97    0.29
  -3   6  -1    4.03    0.40
   3  -6  -1    2.74    0.32
   6   3   1    3.57    0.31
  -6  -3   1    3.56    0.28
  -6  -3   1    3.82    0.36
  -3   6   1    3.33    0.39
   3  -6   1    2.71    0.38
   3  -6   1    3.01    0.16
  -6  -3   1    2.96    0.33
   3  -6   1    3.83    0.39
  -6  -3   1    3.04    0.28
  -3   6   1    2.11    0.34
   6   3   1    2.95    0.41
  -6  -2  -1    0.21    0.16
  -2   6  -1    0.21    0.15
  -6  -2  -1    0.26    0.18
  -2   6  -1    0.19    0.16
   6   2  -1    0.14    0.09
  -6  -2  -1    0.33    0.12
   2  -6  -1    0.02    0.12
   6   2  -1    0.34    0.16
   2  -6  -1    0.26    0.15
   6   2  -1    0.32    0.17
  -6  -2   1    0.09    0.11
  -6  -2   1    0.15    0.10
   2  -6   1    0.13    0.15
   6   2   1    0.06    0.11
  -2   6   1    0.60    0.19
   6   2   1    0.20    0.12
  -6  -2   1    0.19    0.16
  -2   6   1    0.47    0.19
   2  -6   1    0.21    0.14
   6   2   1    0.19    0.11
  -6  -1  -1    0.29    0.14
  -1   6  -1    0.29    0.15
   1  -6  -1    0.31    0.16
  -6  -1  -1    0.25    0.14
  -1   6  -1    0.37    0.15
  -6  -1  -1    0.33    0.13
   6   1  -1    0.20    0.15
   6   1  -1    0.44    0.15
   6   1  -1    0.31    0.10
   1  -6  -1    0.26    0.15
   6   1   1    0.38    0.13
  -6  -1   1    0.30    0.15
  -1   6   1    0.24    0.15
   6   1   1    0.05    0.11
   1  -6   1    0.32    0.13
   6   1   1    0.57    0.14
  -6  -1   1    0.18    0.10
  -1   6   1    0.09    0.14
  -6  -1   1    0.24    0.14
   1  -6   1    0.18    0.14
   0   6  -1    0.13    0.14
   6   0  -1   -0.03    0.08
   0  -6  -1    0.09    0.11
   6   0  -1    0.00    0.10
   0   6  -1    0.15    0.10
  -6   0  -1    0.05    0.09
   0  -6  -1    0.16    0.05
   6   0  -1    0.09    0.10
   0   6  -1    0.08    0.05
   0  -6  -1    0.25    0.12
  -6   0   1    0.12    0.11
   6   0   1    0.00    0.10
   6   0   1    0.01    0.10
   6   0   1    0.06    0.10
   0  -6   1    0.11    0.11
  -6   0   1    0.12    0.09
   0  -6   1    0.05    0.05
   0   6   1    0.07    0.11
   0   6   1    0.15    0.06
  -6   1  -1    0.34    0.16
  -1  -6  -1    0.20    0.08
   1   6  -1    0.16    0.11
   1   6  -1    0.19    0.12
  -1  -6  -1    0.18    0.15
  -6   1  -1    0.22    0.14
   1   6  -1    0.23    0.08
   6  -1  -1    0.15    0.11
  -1  -6  -1    0.15    0.08
   6  -1  -1    0.24    0.16
   6  -1  -1    0.33    0.13
  -6   1  -1    0.30    0.14
  -1  -6   1    0.23    0.09
   1   6   1    0.23    0.16
  -1  -6   1    0.10    0.10
  -1  -6   1    0.25    0.15
  -6   1   1    0.26    0.16
  -6   1   1    0.16    0.13
   6  -1   1    0.36    0.13
   6  -1   1    0.37    0.16
  -6   1   1    0.34    0.12
   1   6   1    0.24    0.14
   1   6   1    0.15    0.08
   6  -1   1    0.20    0.12
   2   6  -1    0.20    0.12
   6  -2  -1   -0.03    0.10
  -6   2  -1    0.11    0.13
  -2  -6  -1    0.20    0.16
  -2  -6  -1    0.07    0.12
   2   6  -1    0.05    0.13
   2   6  -1    0.28    0.14
  -6   2  -1    0.23    0.12
   6  -2  -1    0.24    0.13
  -2  -6  -1    0.06    0.10
   6  -2  -1    0.15    0.13
  -6   2  -1    0.24    0.13
  -6   2   1    0.32    0.15
   6  -2   1    0.09    0.12
   6  -2   1    0.37    0.15
  -2  -6   1    0.21    0.14
  -6   2   1   -0.01    0.10
  -2  -6   1    0.09    0.10
   2   6   1    0.15    0.12
   2   6   1    0.20    0.13
  -2  -6   1    0.07    0.11
   6  -2   1    0.06    0.12
   2   6   1    0.17    0.12
   3   6  -1    2.70    0.28
  -3  -6  -1    3.61    0.35
  -6   3  -1    2.44    0.27
   3   6  -1    2.91    0.32
  -3  -6  -1    3.32    0.32
   6  -3  -1    2.90    0.29
  -3  -6  -1    3.04    0.28
  -6   3  -1    3.21    0.35
   3   6  -1    3.28    0.35
   6  -3  -1    3.86    0.39
   6  -3  -1    2.52    0.28
   3   6   1    3.11    0.36
  -6   3   1    3.09    0.32
  -3  -6   1    3.17    0.34
   3   6   1    3.09    0.30
   6  -3   1    2.98    0.35
  -3  -6   1    3.35    0.32
   6  -3   1    3.71    0.37
   6  -3   1    3.08    0.30
  -6   3   1    2.61    0.28
  -3  -6   1    2.73    0.26
  -6   3   1    3.05    0.35
   6  -3   1    3.04    0.32
   3   6   1    2.86    0.33
  -6   4  -1    7.76    0.50
   4   6  -1    7.72    0.54
  -6   4  -1    7.46    0.56
  -4  -6  -1    8.77    0.57
   6  -4  -1    9.49    0.66
  -4  -6  -1    7.53    0.51
   6  -4  -1    6.82    0.52
   4   6  -1    8.94    0.60
  -4  -6  -1    8.82    0.56
   4   6  -1    8.26    0.56
  -6   4   1    7.76    0.55
   4   6   1    7.49    0.55
   6  -4   1    7.15    0.53
   4   6   1    8.53    0.59
  -4  -6   1    8.92    0.60
  -4  -6   1    7.33    0.51
   6  -4   1    9.20    0.64
   6  -4   1    8.68    0.61
   4   6   1    8.49    0.55
  -6   4   1    7.44    0.50
   6  -5  -1    1.79    0.26
   5   6  -1    2.36    0.36
  -6   5  -1    1.58    0.32
   5   6  -1    1.79    0.31
   6  -5  -1    2.00    0.33
   6  -5  -1    1.93    0.36
  -5  -6  -1    2.70    0.31
   5   6  -1    2.15    0.33
  -5  -6  -1    1.83    0.31
  -6   5  -1    1.91    0.26
  -5  -6  -1    2.01    0.32
   6  -5  -1    2.36    0.40
  -6   5   1    2.06    0.27
   5   6   1    2.40    0.36
  -6   5   1    2.02    0.35
  -5  -6   1    2.00    0.34
   6  -5   1    1.84    0.37
   5   6   1    2.46    0.36
   6  -5   1    2.23    0.26
  -5  -6   1    1.75    0.31
   6  -5   1    1.75    0.34
   5   6   1    1.77    0.32
  -5  -6   1    2.52    0.28
   6  -5   1    2.29    0.37
  -6   6  -1    5.91    0.40
   6   6  -1    6.13    0.49
   6   6  -1    6.16    0.51
   6   6  -1    6.13    0.54
  -6  -6  -1    6.62    0.52
   6  -6  -1    5.91    0.40
  -6  -6  -1    6.43    0.50
  -6  -6  -1    7.01    0.62
  -6  -6  -1    7.26    0.54
   6  -6  -1    8.53    0.67
  -6   6  -1    5.98    0.53
  -6  -6   1    6.85    0.56
  -6   6   1    4.87    0.49
   6  -6   1    7.20    0.60
   6   6   1    5.64    0.53
  -6   6   1    5.14    0.39
   6  -6   1    6.56    0.41
  -6  -6   1    6.50    0.46
   6   6   1    6.59    0.50
  -6  -6   1    5.66    0.57
   6  -7  -1    0.57    0.16
   6  -7  -1    0.81    0.27
  -6   7  -1    0.92    0.26
  -7  -6  -1    0.82    0.24
   7   6  -1    0.41    0.25
  -7  -6  -1    0.88    0.25
  -6   7  -1    0.52    0.16
  -7  -6  -1    0.83    0.25
   7   6   1    0.57    0.27
   6  -7   1    0.75    0.24
  -6   7   1    0.80    0.26
  -7  -6   1    1.02    0.24
  -6   7   1    0.97    0.19
  -7  -6   1    0.98    0.26
  -7  -6   1    0.85    0.24
   7   6   1    0.67    0.24
   6  -7   1    0.72    0.17
  -5   7  -1    1.70    0.17
  -5   7  -1    1.23    0.30
   5  -7  -1    2.02    0.39
  -7  -5  -1    2.07    0.35
  -7  -5  -1    1.80    0.28
   7   5  -1    1.69    0.33
   5  -7  -1    1.77    0.18
   7   5  -1    1.99    0.39
  -7  -5  -1    1.86    0.32
  -5   7   1    1.56    0.18
  -7  -5   1    1.65    0.29
   7   5   1    1.50    0.29
  -5   7   1    1.44    0.31
   5  -7   1    1.61    0.19
  -7  -5   1    1.75    0.31
   7   5   1    1.60    0.35
  -7  -5   1    1.82    0.36
   5  -7   1    2.07    0.38
  -7  -4  -1    1.24    0.26
   4  -7  -1    0.99    0.10
   4  -7  -1    1.08    0.28
  -7  -4  -1    0.85    0.23
  -7  -4  -1    1.17    0.21
  -4   7  -1    0.98    0.11
  -4   7  -1    0.75    0.24
   7   4  -1    1.27    0.26
   7   4  -1    0.99    0.27
  -7  -4   1    1.07    0.20
  -4   7   1    1.03    0.26
   4  -7   1    1.33    0.30
  -7  -4   1    1.00    0.26
   4  -7   1    0.93    0.10
  -7  -4   1    0.84    0.21
   7   4   1    0.88    0.26
   7   4   1    0.89    0.20
  -7  -3  -1    4.40    0.39
  -3   7  -1    4.49    0.44
   3  -7  -1    5.38    0.49
   7   3  -1    3.56    0.42
  -7  -3  -1    5.10    0.42
   7   3  -1    4.07    0.37
   7   3   1    4.09    0.36
   7   3   1    4.42    0.45
  -7  -3   1    4.33    0.40
  -7  -3   1    5.29    0.45
   7   3   1    4.11    0.42
  -3   7   1    4.07    0.42
  -7  -3   1    4.16    0.34
   3  -7   1    4.12    0.44
  -7  -2  -1    2.76    0.31
  -2   7  -1    1.89    0.35
   2  -7  -1    2.52    0.37
  -2   7  -1    2.76    0.42
   2  -7  -1    3.12    0.37
   7   2  -1    2.87    0.41
  -7  -2  -1    2.12    0.26
   7   2  -1    2.32    0.25
  -7  -2  -1    2.11    0.34
  -7  -2   1    2.71    0.27
   7   2   1    3.00    0.29
  -7  -2   1    2.16    0.35
   2  -7   1    3.33    0.40
   7   2   1    2.72    0.30
  -7  -2   1    2.25    0.35
  -2   7   1    3.05    0.38
   7   2   1    2.70    0.40
  -2   7   1    2.18    0.38
   2  -7   1    1.70    0.31
   7   1  -1    1.41    0.23
  -7  -1  -1    1.70    0.33
   7   1  -1    1.80    0.32
   7   1  -1    1.84    0.29
   1  -7  -1    1.49    0.29
  -7  -1  -1    1.32    0.25
  -1   7  -1    1.19    0.28
  -1   7  -1    1.10    0.26
  -7  -1  -1    1.49    0.28
   1  -7  -1    1.84    0.31
  -7  -1   1    0.56    0.19
  -7  -1   1    1.26    0.21
   1  -7   1    1.35    0.29
  -1   7   1    1.39    0.31
  -1   7   1    0.88    0.26
  -7  -1   1    1.48    0.28
   7   1   1    1.72    0.26
   7   1   1    1.31    0.27
   7   1   1    1.53    0.25
   1  -7   1    1.14    0.26
  -7   0  -1   -0.07    0.11
   7   0  -1   -0.12    0.10
   0  -7  -1   -0.04    0.05
   7   0  -1    0.10    0.12
   0   7  -1    0.03    0.06
  -7   0  -1   -0.13    0.15
   0  -7  -1    0.12    0.14
  -7   0  -1    0.03    0.11
   0   7  -1    0.03    0.16
   0  -7  -1    0.11    0.12
   0   7  -1   -0.03    0.12
   7   0  -1   -0.06    0.12
  -7   0   1   -0.07    0.09
   0  -7   1    0.07    0.15
   7   0   1    0.06    0.13
  -7   0   1    0.00    0.10
   0   7   1    0.12    0.15
   0   7   1    0.07    0.14
  -7   0   1    0.01    0.16
   7   0   1    0.16    0.12
   7   0   1    0.03    0.12
   0  -7   1    0.08    0.06
   0  -7   1   -0.09    0.11
   0   7   1   -0.02    0.06
  -1  -7  -1    1.06    0.26
   7  -1  -1    1.24    0.32
  -1  -7  -1    1.07    0.15
  -7   1  -1    1.33    0.26
   1   7  -1    1.02    0.24
   7  -1  -1    1.15    0.22
  -1  -7  -1    1.59    0.30
  -7   1  -1    1.02    0.26
  -7   1  -1    1.00    0.24
   1   7  -1    0.94    0.17
   7  -1  -1    0.89    0.24
   1   7  -1    0.86    0.24
   1   7   1    1.25    0.28
  -1  -7   1    1.09    0.25
  -1  -7   1    1.54    0.30
   7  -1   1    1.23    0.24
  -1  -7   1    1.34    0.18
   7  -1   1    1.14    0.27
   1   7   1    1.43    0.28
   1   7   1    1.38    0.19
  -7   1   1    1.43    0.25
  -7   1   1    2.32    0.36
   7  -1   1    1.80    0.27
  -7   1   1    1.34    0.27
   2   7  -1    2.36    0.38
   2   7  -1    2.40    0.25
   2   7  -1    2.38    0.37
  -2  -7  -1    2.35    0.23
  -7   2  -1    2.66    0.30
   7  -2  -1    2.50    0.37
  -7   2  -1    2.53    0.37
   7  -2  -1    3.66    0.38
  -7   2  -1    2.05    0.32
  -2  -7  -1    2.43    0.36
   7  -2  -1    2.16    0.30
  -2  -7  -1    2.75    0.33
   7  -2   1    2.06    0.31
  -2  -7   1    2.27    0.34
  -2  -7   1    1.62    0.23
  -2  -7   1    2.38    0.36
   7  -2   1    2.44    0.31
   2   7   1    2.23    0.24
   2   7   1    2.79    0.40
  -7   2   1    2.37    0.38
  -7   2   1    2.85    0.31
   2   7   1    2.59    0.38
  -7   2   1    1.98    0.30
   7  -2   1    2.88    0.32
  -7   3  -1    4.27    0.42
   7  -3  -1    4.68    0.47
   3   7  -1    3.98    0.41
   3   7  -1    4.23    0.42
  -3  -7  -1    3.84    0.33
   7  -3  -1    3.56    0.35
  -3  -7  -1    4.62    0.41
  -7   3  -1    3.82    0.36
  -7   3  -1    4.77    0.45
   7  -3  -1    4.27    0.39
   3   7  -1    3.68    0.38
  -3  -7  -1    4.81    0.44
  -3  -7   1    4.86    0.46
  -7   3   1    4.48    0.46
   7  -3   1    3.90    0.39
   7  -3   1    3.75    0.37
  -3  -7   1    3.57    0.36
   3   7   1    4.51    0.43
   7  -3   1    4.40    0.43
  -7   3   1    3.83    0.37
   3   7   1    4.22    0.41
   3   7   1    4.12    0.42
  -3  -7   1    4.26    0.35
  -7   3   1    3.40    0.35
  -7   4  -1    0.87    0.23
   7  -4  -1    1.03    0.23
   7  -4  -1    1.04    0.31
   4   7  -1    0.93    0.23
  -4  -7  -1    0.85    0.22
   4   7  -1    1.43    0.28
  -4  -7  -1    0.94    0.25
   4   7  -1    1.32    0.31
   7  -4  -1    1.31    0.25
  -7   4  -1    0.78    0.24
   4   7   1    0.75    0.25
   7  -4   1    1.33    0.25
  -7   4   1    1.29    0.27
  -4  -7   1    0.90    0.22
   7  -4   1    1.45    0.30
  -7   4   1    0.98    0.25
  -7   4   1    0.90    0.27
   4   7   1    1.20    0.29
   7  -4   1    0.82    0.26
   7  -4   1    0.91    0.25
   4   7   1    0.76    0.21
  -4  -7   1    0.77    0.24
  -5  -7  -1    1.98    0.37
  -5  -7  -1    2.04    0.35
  -7   5  -1    1.81    0.35
   5   7  -1    1.40    0.30
   7  -5  -1    2.37    0.43
   5   7  -1    1.65    0.32
  -7   5  -1    1.51    0.27
   7  -5  -1    2.64    0.30
   7  -5  -1    1.47    0.35
  -5  -7  -1    1.63    0.28
  -5  -7   1    1.76    0.33
  -7   5   1    1.70    0.34
   5   7   1    1.31    0.29
   7  -5   1    1.51    0.26
   7  -5   1    2.06    0.38
  -5  -7   1    1.23    0.26
  -5  -7   1    1.65    0.29
   5   7   1    1.91    0.34
   5   7   1    1.81    0.32
  -7   5   1    1.42    0.26
   6   7  -1    0.91    0.28
  -7   6  -1    0.87    0.20
  -6  -7  -1    0.85    0.25
   6   7  -1    1.37    0.31
  -7   6  -1    0.59    0.24
   7  -6  -1    0.70    0.25
   7  -6  -1    0.48    0.17
  -6  -7   1    0.86    0.23
   6   7   1    0.85    0.28
   7  -6   1    0.59    0.28
   6   7   1    0.57    0.22
  -7   6   1    0.69    0.21
   7  -6   1    0.50    0.18
  -6  -7   1    0.70    0.22
   6   7   1    0.68    0.27
  -7   6   1    0.51    0.24
  -7  -7  -1    3.69    0.44
  -7   7  -1    2.78    0.31
  -7   7  -1    3.10    0.48
   7  -7  -1    4.61    0.67
   7   7  -1    2.78    0.47
  -7  -7  -1    2.88    0.44
   7  -7   1    4.03    0.49
  -7  -7   1    3.58    0.38
  -7   7   1    3.08    0.50
  -7   7   1    3.26    0.32
  -7  -7   1    4.07    0.46
  -7  -7   1    3.36    0.40
   7   7   1    3.15    0.50
  -7   8  -1    2.59    0.46
  -8  -7  -1    3.40    0.41
   7  -8  -1    2.30    0.29
   8   7  -1    2.29    0.46
  -8  -7  -1    3.48    0.48
   7  -8  -1    2.36    0.51
  -7   8  -1    2.67    0.28
   8   7   1    2.12    0.44
  -7   8   1    2.19    0.46
  -8  -7   1    2.82    0.48
  -8  -7   1    2.58    0.40
   7  -8   1    2.60    0.27
   7  -8   1    3.11    0.56
  -7   8   1    2.17    0.28
  -8  -6  -1    0.71    0.25
  -8  -6  -1    0.72    0.26
  -6   8  -1    0.79    0.29
   6  -8  -1    0.71    0.16
   6  -8  -1    1.40    0.35
  -6   8  -1    0.93    0.17
   8   6  -1    0.93    0.32
   6  -8   1    1.03    0.18
  -8  -6   1    1.05    0.27
  -6   8   1    0.73    0.16
   8   6   1    1.05    0.32
   8   6   1    0.82    0.25
  -8  -6   1    1.06    0.26
  -8  -6   1    1.15    0.30
   6  -8   1    1.52    0.40
  -6   8   1    1.02    0.30
   5  -8  -1    5.98    0.58
  -8  -5  -1    4.95    0.46
  -8  -5  -1    5.18    0.46
  -5   8  -1    4.43    0.26
  -8  -5  -1    5.09    0.49
   8   5  -1    4.79    0.52
   5  -8  -1    4.43    0.26
  -5   8  -1    5.86    0.54
  -5   8   1    3.77    0.25
   8   5   1    5.32    0.46
   5  -8   1    5.04    0.53
   5  -8   1    4.43    0.26
  -8  -5   1    5.38    0.51
   8   5   1    4.52    0.51
  -8  -5   1    4.07    0.38
  -8  -5   1    3.96    0.39
  -5   8   1    4.54    0.49
  -4   8  -1    1.62    0.37
   8   4  -1    1.84    0.36
   4  -8  -1    2.46    0.45
  -8  -4  -1    2.12    0.34
   8   4  -1    1.97    0.34
  -8  -4  -1    1.51    0.29
  -8  -4  -1    1.91    0.31
   8   4   1    1.36    0.34
  -8  -4   1    2.34    0.39
   4  -8   1    2.03    0.39
  -4   8   1    1.62    0.35
  -8  -4   1    1.75    0.30
   8   4   1    1.56    0.28
   8   3  -1    0.44    0.21
  -8  -3  -1    0.30    0.18
  -8  -3  -1    0.40    0.17
   8   3  -1    0.40    0.16
  -3   8  -1    0.33    0.20
   3  -8  -1    0.35    0.21
  -8  -3   1    0.29    0.15
   8   3   1    0.38    0.20
   8   3   1    0.31    0.19
  -3   8   1    0.04    0.18
  -8  -3   1    0.36    0.19
   8   3   1    0.31    0.19
   3  -8   1    0.24    0.20
  -8  -2  -1    9.31    0.62
  -8  -2  -1    7.52    0.55
   8   2  -1    9.18    0.54
  -2   8  -1    8.11    0.64
   8   2  -1    8.13    0.65
   2  -8  -1    8.93    0.68
   8   2  -1    9.39    0.61
  -2   8   1    8.86    0.66
   2  -8   1    8.87    0.67
  -8  -2   1    8.31    0.54
  -8  -2   1    8.51    0.63
   8   2   1    8.28    0.54
   8   2   1    8.02    0.65
   8   2   1    8.72    0.58
   1  -8  -1    5.80    0.53
   8   1  -1    5.95    0.47
   8   1  -1    3.44    0.50
   8   1  -1    4.69    0.38
  -1   8  -1    5.12    0.51
  -8  -1  -1    5.84    0.48
  -8  -1  -1    4.91    0.43
  -8  -1   1    4.40    0.38
   1  -8   1    5.21    0.50
   8   1   1    5.61    0.44
  -8  -1   1    4.71    0.45
   8   1   1    5.24    0.51
   8   1   1    5.47    0.43
  -1   8   1    5.73    0.51
   8   0  -1    6.72    0.50
   0  -8  -1    5.30    0.50
   0  -8  -1    4.57    0.26
   0   8  -1    4.64    0.27
  -8   0  -1    3.79    0.39
   8   0  -1    5.13    0.39
   0   8  -1    5.20    0.49
   8   0  -1    5.43    0.49
  -8   0  -1    5.66    0.48
   8   0   1    4.95    0.42
   0  -8   1    4.11    0.27
  -8   0   1    5.82    0.50
  -8   0   1    4.59    0.38
   8   0   1    5.29    0.50
   0  -8   1    5.58    0.51
   0   8   1    4.84    0.27
   0   8   1    5.80    0.52
   8   0   1    5.78    0.44
  -8   1  -1    4.15    0.40
  -8   1  -1    5.09    0.52
  -8   1  -1    5.41    0.48
   8  -1  -1    4.67    0.46
  -1  -8  -1    4.31    0.29
   1   8  -1    4.73    0.32
   8  -1  -1    4.98    0.45
  -1  -8  -1    5.62    0.50
   8  -1  -1    4.74    0.39
   1   8  -1    4.00    0.44
   1   8   1    4.98    0.48
  -8   1   1    4.23    0.38
   8  -1   1    5.28    0.44
   1   8   1    4.63    0.31
  -8   1   1    5.42    0.49
  -8   1   1    4.98    0.52
   8  -1   1    4.50    0.41
  -1  -8   1    3.85    0.29
   8  -1   1    4.56    0.45
  -1  -8   1    5.28    0.48
  -8   2  -1    7.71    0.56
  -2  -8  -1    7.31    0.45
  -2  -8  -1    8.76    0.63
   2   8  -1    7.47    0.47
   8  -2  -1    6.73    0.51
  -8   2  -1    8.70    0.64
   8  -2  -1    8.85    0.65
   8  -2  -1    8.26    0.61
  -8   2  -1    7.39    0.55
   2   8  -1    8.85    0.63
   2   8   1    7.65    0.48
  -8   2   1    6.90    0.52
  -8   2   1    9.40    0.67
  -8   2   1    7.01    0.54
   8  -2   1    8.84    0.61
  -2  -8   1    9.39    0.66
  -2  -8   1    6.72    0.44
   2   8   1    8.38    0.65
   8  -2   1    8.27    0.61
   8  -2   1    8.18    0.56
  -8   3  -1    0.16    0.17
   8  -3  -1    0.22    0.18
   8  -3  -1    0.47    0.21
   3   8  -1    0.28    0.16
  -3  -8  -1    0.12    0.13
   8  -3  -1    0.36    0.27
   3   8  -1   -0.07    0.14
  -8   3  -1    0.27    0.20
  -3  -8  -1    0.35    0.18
  -8   3  -1    0.08    0.14
  -8   3   1   -0.10    0.16
   8  -3   1    0.46    0.21
  -8   3   1    0.20    0.18
   8  -3   1    0.29    0.19
  -8   3   1    0.29    0.20
   3   8   1    0.33    0.17
   8  -3   1    0.32    0.21
  -3  -8   1    0.25    0.17
   3   8   1    0.28    0.16
  -3  -8   1    0.38    0.15
  -4  -8  -1    2.05    0.31
   8  -4  -1    1.89    0.30
   4   8  -1    1.88    0.34
  -8   4  -1    1.61    0.32
  -8   4  -1    2.17    0.33
   8  -4  -1    1.53    0.29
   4   8  -1    1.57    0.28
  -4  -8  -1    1.99    0.35
  -4  -8   1    1.77    0.30
  -8   4   1    1.86    0.32
   8  -4   1    1.68    0.29
  -8   4   1    1.71    0.30
  -8   4   1    2.31    0.42
  -4  -8   1    2.03    0.37
   8  -4   1    2.06    0.38
   4   8   1    2.16    0.37
   4   8   1    1.88    0.30
  -5  -8  -1    4.14    0.43
   5   8  -1    5.18    0.47
   5   8  -1    5.05    0.49
   8  -5  -1    4.40    0.42
  -5  -8  -1    4.66    0.48
   8  -5  -1    4.70    0.55
  -8   5  -1    4.30    0.48
  -8   5  -1    4.16    0.41
  -8   5   1    4.07    0.45
  -8   5   1    4.62    0.41
  -5  -8   1    4.53    0.43
   5   8   1    4.75    0.46
   8  -5   1    5.51    0.54
   5   8   1    5.67    0.53
  -5  -8   1    5.06    0.51
   8  -5   1    5.20    0.45
   8  -6  -1    1.02    0.34
   8  -6  -1    1.15    0.25
  -8   6  -1    1.13    0.26
   6   8  -1    1.00    0.29
  -6  -8  -1    1.19    0.28
   6   8  -1    0.95    0.30
  -8   6  -1    0.65    0.26
  -6  -8   1    0.85    0.27
   6   8   1    1.17    0.33
  -8   6   1    0.48    0.22
  -8   6   1    0.72    0.25
   8  -6   1    0.79    0.22
   8  -6   1    1.00    0.35
   6   8   1    0.91    0.29
  -8   7  -1    2.34    0.44
  -7  -8  -1    2.79    0.44
   7   8  -1    2.63    0.43
   7   8  -1    1.50    0.37
   8  -7  -1    2.94    0.55
   8  -7  -1    2.47    0.36
  -7  -8  -1    2.14    0.42
   8  -7   1    2.45    0.36
   7   8   1    2.71    0.48
  -8   7   1    2.78    0.47
  -7  -8   1    3.12    0.52
   8  -7   1    2.31    0.47
  -8   8  -1   -0.03    0.22
  -8  -8  -1    0.01    0.20
  -8  -8  -1    0.10    0.20
   8  -8  -1   -0.08    0.14
   8   8  -1   -0.12    0.22
  -8   8  -1   -0.13    0.18
  -8   8   1    0.02    0.20
  -8   8   1    0.09    0.22
  -8  -8   1    0.35    0.21
  -8  -8   1   -0.20    0.19
   8   8   1   -0.17    0.19
   8  -8   1    0.02    0.14
   8  -8   1    0.15    0.27
  -9  -8  -1    1.14    0.34
  -8   9  -1    0.88    0.32
  -9  -8  -1    0.55    0.30
   8  -9  -1    0.98    0.36
   9   8  -1    0.43    0.32
  -8   9  -1    0.89    0.22
   9   8   1    0.61    0.38
  -8   9   1    0.40    0.20
   8  -9   1    0.77    0.33
  -9  -8   1    0.35    0.25
  -8   9   1    0.57    0.32
  -9  -8   1    0.30    0.20
  -9  -7  -1    6.76    0.60
   7  -9  -1    5.48    0.37
   7  -9  -1    6.39    0.70
  -7   9  -1    4.74    0.37
  -7   9  -1    5.21    0.58
   9   7  -1    5.65    0.64
  -9  -7  -1    5.28    0.55
  -9  -7   1    6.04    0.61
  -7   9   1    5.42    0.38
   9   7   1    7.27    0.71
   7  -9   1    5.36    0.37
  -9  -7   1    6.12    0.57
   7  -9   1    6.01    0.93
   6  -9  -1    6.82    0.37
  -9  -6  -1    7.78    0.61
  -9  -6  -1    7.75    0.64
   9   6  -1    6.31    0.68
  -6   9  -1    6.51    0.64
  -6   9  -1    6.03    0.36
   6  -9  -1    7.37    0.72
  -9  -6   1    7.42    0.59
   6  -9   1    7.06    0.37
  -6   9   1    7.32    0.68
   6  -9   1    9.34    0.77
  -6   9   1    6.61    0.37
   9   6   1    7.91    0.72
  -9  -6   1    9.85    0.74
   5  -9  -1    6.15    0.63
  -5   9  -1    4.09    0.59
  -9  -5  -1    5.39    0.49
  -9  -5  -1    5.99    0.54
   9   5  -1    5.01    0.58
   9   5   1    4.19    0.60
   5  -9   1    7.33    0.65
  -5   9   1    4.90    0.53
  -9  -5   1    5.83    0.56
  -9  -5   1    5.76    0.49
  -9  -5   1    4.99    0.47
   9   5   1    5.67    0.50
  -4   9  -1    4.97    0.52
   9   4  -1    4.02    0.58
  -9  -4  -1    3.90    0.42
  -9  -4  -1    4.74    0.46
   4  -9  -1    5.00    0.55
  -9  -4  -1    4.93    0.47
  -9  -4   1    4.21    0.39
   4  -9   1    4.82    0.54
  -9  -4   1    4.93    0.51
   9   4   1    3.96    0.59
  -4   9   1    4.34    0.50
  -9  -4   1    4.86    0.42
   9   4   1    4.70    0.44
   3  -9  -1    2.22    0.43
   9   3  -1    3.02    0.43
  -3   9  -1    2.89    0.48
  -9  -3  -1    2.42    0.39
   9   3  -1    1.58    0.35
  -9  -3  -1    1.83    0.34
  -9  -3   1    1.95    0.30
   9   3   1    2.16    0.32
  -9  -3   1    2.22    0.38
   9   3   1    2.75    0.37
   3  -9   1    1.97    0.42
   9   3   1    1.55    0.37
  -3   9   1    2.10    0.42
   2  -9  -1    2.65    0.44
  -9  -2  -1    2.41    0.36
  -9  -2  -1    3.49    0.39
   9   2  -1    2.72    0.40
   9   2  -1    3.05    0.36
   9   2  -1    3.02    0.48
  -2   9  -1    2.66    0.44
  -9  -2   1    3.45    0.42
  -2   9   1    2.71    0.46
   9   2   1    3.25    0.37
  -9  -2   1    2.64    0.31
   2  -9   1    3.32    0.51
   9   2   1    3.09    0.35
   9   2   1    3.19    0.52
   1  -9  -1    2.41    0.44
   9   1  -1    1.54    0.37
  -9  -1  -1    1.31    0.27
  -9  -1  -1    1.64    0.32
  -1   9  -1    0.66    0.26
   9   1  -1    1.92    0.33
   9   1  -1    1.47    0.30
  -9  -1   1    1.44    0.32
   9   1   1    1.37    0.35
   1  -9   1    1.56    0.35
   9   1   1    1.46    0.27
  -1   9   1    1.31    0.31
  -9  -1   1    1.44    0.28
   9   1   1    1.47    0.29
   9   0  -1    0.03    0.14
   9   0  -1    0.20    0.19
   0  -9  -1    0.17    0.16
  -9   0  -1    0.40    0.20
   0   9  -1    0.38    0.18
  -9   0  -1    0.59    0.20
   9   0  -1    0.00    0.17
   0   9  -1    0.14    0.09
   0  -9  -1    0.20    0.09
   9   0   1    0.13    0.17
   0  -9   1    0.29    0.08
  -9   0   1    0.41    0.18
   0   9   1    0.20    0.09
   0   9   1    0.01    0.15
  -9   0   1    0.24    0.17
   0  -9   1    0.12    0.18
   9   0   1    0.09    0.17
   9   0   1    0.19    0.16
  -9   1  -1    1.86    0.35
   1   9  -1    1.36    0.18
   9  -1  -1    1.82    0.38
  -9   1  -1    1.11    0.26
   9  -1  -1    1.36    0.33
   1   9  -1    1.43    0.31
  -1  -9  -1    1.59    0.18
  -1  -9  -1    1.23    0.31
   9  -1  -1    1.12    0.25
   9  -1   1    1.58    0.36
  -9   1   1    1.61    0.35
  -1  -9   1    1.71    0.36
   9  -1   1    1.45    0.30
  -9   1   1    0.93    0.22
   1   9   1    1.85    0.20
   9  -1   1    1.72    0.32
  -1  -9   1    1.26    0.18
   1   9   1    0.92    0.28
  -9   2  -1    3.92    0.44
  -9   2  -1    3.02    0.36
  -2  -9  -1    2.98    0.29
   2   9  -1    3.27    0.30
   9  -2  -1    2.81    0.45
   9  -2  -1    2.60    0.36
  -2  -9  -1    3.89    0.43
   2   9  -1    2.42    0.43
  -9   2   1    3.59    0.53
  -9   2   1    2.83    0.39
   2   9   1    2.49    0.28
  -2  -9   1    3.28    0.41
   2   9   1    3.00    0.46
   9  -2   1    2.52    0.41
  -2  -9   1    1.91    0.28
   9  -2   1    3.34    0.41
  -9   3  -1    2.53    0.43
   3   9  -1    1.82    0.28
   9  -3  -1    1.85    0.34
  -3  -9  -1    1.85    0.29
   3   9  -1    2.10    0.38
   9  -3  -1    1.85    0.34
  -3  -9  -1    2.43    0.41
  -9   3  -1    2.06    0.37
   3   9   1    2.14    0.30
  -3  -9   1    1.64    0.29
  -3  -9   1    2.70    0.44
  -9   3   1    2.59    0.46
  -9   3   1    2.17    0.36
   3   9   1    2.74    0.45
   9  -3   1    1.68    0.33
  -4  -9  -1    3.65    0.39
   9  -4  -1    4.37    0.47
   4   9  -1    4.66    0.43
  -4  -9  -1    4.54    0.50
  -9   4  -1    3.93    0.47
   4   9  -1    5.48    0.52
  -9   4   1    4.75    0.53
  -4  -9   1    3.64    0.40
  -9   4   1    4.25    0.46
   9  -4   1    5.29    0.50
  -4  -9   1    4.26    0.49
   4   9   1    4.70    0.44
   9  -4   1    5.98    0.59
   4   9   1    4.60    0.50
  -9   5  -1    4.88    0.48
  -9   5  -1    4.84    0.52
  -5  -9  -1    4.44    0.47
  -5  -9  -1    6.15    0.58
   9  -5  -1    6.71    0.65
   5   9  -1    5.81    0.51
   9  -5  -1    4.74    0.48
   5   9  -1    4.99    0.52
   5   9   1    4.61    0.50
  -9   5   1    4.47    0.46
  -5  -9   1    4.85    0.48
   5   9   1    6.03    0.58
  -9   5   1    4.93    0.51
   9  -5   1    6.49    0.63
   9  -5   1    5.24    0.50
  -5  -9   1    6.01    0.60
  -9   6  -1    6.85    0.64
  -6  -9  -1    7.65    0.67
   6   9  -1    8.23    0.66
   9  -6  -1    8.21    0.60
   9  -6  -1    9.43    0.81
  -9   6  -1    5.69    0.54
   6   9  -1    8.26    0.68
   9  -6   1    7.21    0.58
   9  -6   1    7.75    0.72
  -6  -9   1    7.98    0.71
  -9   6   1    6.93    0.57
   6   9   1    8.00    0.68
  -9   6   1    5.41    0.57
   6   9   1    7.89    0.65
   7   9  -1    5.58    0.61
   7   9  -1    6.05    0.59
   9  -7  -1    5.83    0.49
  -9   7  -1    5.24    0.60
  -9   7  -1    5.16    0.48
  -7  -9  -1    6.76    0.63
   9  -7  -1    7.28    0.74
   7   9   1    5.38    0.58
  -9   7   1    5.48    0.49
   7   9   1    5.63    0.61
  -9   7   1    4.47    0.53
  -7  -9   1    6.22    0.64
   9  -7   1    5.93    0.50
   9  -7   1    6.72    0.67
  -8  -9  -1    0.44    0.27
   8   9  -1    0.57    0.28
  -9   8  -1    0.67    0.33
   9  -8  -1    0.76    0.22
  -9   8  -1    0.68    0.24
   9  -8  -1    0.62    0.34
  -8  -9  -1    0.94    0.27
  -9   8   1    0.82    0.32
   9  -8   1    0.87    0.24
  -8  -9   1    0.85    0.34
  -9   8   1    0.41    0.26
  -8  -9   1    0.82    0.31
   9  -8   1    1.35    0.42
   8   9   1    0.99    0.32
  -9  -9  -1    1.10    0.32
   9   9  -1    0.72    0.35
   9  -9  -1    1.48    0.29
  -9  -9  -1    1.27    0.36
   9  -9  -1    1.94    0.51
  -9   9  -1    1.71    0.47
   9  -9   1    1.81    0.49
  -9  -9   1    1.67    0.43
   9  -9   1    1.08    0.25
  -9   9   1    1.36    0.41
   9   9   1    1.76    0.49
  10   9  -1   12.70    1.02
 -10  -9  -1   12.48    0.94
  -9  10  -1    9.60    0.61
   9 -10  -1   13.01    1.09
  -9  10  -1    9.65    0.89
   9 -10  -1   10.70    0.65
  -9  10   1   11.69    0.93
 -10  -9   1   10.51    0.84
  -9  10   1    9.31    0.61
 -10  -9   1   11.21    0.90
   9 -10   1   10.73    0.64
  10   9   1   12.11    0.99
   9 -10   1   12.41    1.03
 -10  -8  -1    7.51    0.71
 -10  -8  -1    6.64    0.65
  -8  10  -1    5.95    0.71
  10   8  -1    6.71    0.76
   8 -10  -1    6.91    0.78
   8 -10  -1    5.94    0.41
  -8  10  -1    5.93    0.42
   8 -10   1    7.86    0.83
  10   8   1    9.13    0.85
 -10  -8   1    8.15    0.67
   8 -10   1    6.60    0.42
 -10  -8   1    8.04    0.73
  -8  10   1    5.77    0.41
  -8  10   1    7.49    0.76
  -7  10  -1    1.80    0.20
 -10  -7  -1    1.35    0.37
 -10  -7  -1    1.36    0.35
  10   7  -1    1.62    0.46
   7 -10  -1    1.37    0.17
  -7  10  -1    1.67    0.40
   7 -10  -1    1.69    0.43
  -7  10   1    0.99    0.35
 -10  -7   1    1.52    0.38
  10   7   1    0.95    0.34
   7 -10   1    1.47    0.18
   7 -10   1    2.03    0.50
 -10  -7   1    1.07    0.33
 -10  -6  -1    1.30    0.35
   6 -10  -1    1.64    0.42
  10   6  -1    1.06    0.34
 -10  -6  -1    1.05    0.32
  -6  10  -1    1.31    0.38
   6 -10   1    1.17    0.38
 -10  -6   1    1.41    0.36
  -6  10   1    1.06    0.37
 -10  -6   1    1.10    0.31
  10   6   1    1.75    0.43
 -10  -5  -1    2.74    0.44
  10   5  -1    2.42    0.46
  -5  10  -1    2.57    0.47
   5 -10  -1    2.71    0.51
 -10  -5  -1    2.90    0.46
 -10  -5   1    2.28    0.45
   5 -10   1    3.02    0.54
  -5  10   1    2.88    0.54
  10   5   1    3.66    0.59
 -10  -5   1    2.71    0.42
 -10  -5   1    2.71    0.59
 -10  -4  -1    0.91    0.30
  -4  10  -1    0.56    0.31
  10   4  -1    1.04    0.34
 -10  -4  -1    1.34    0.29
   4 -10  -1    0.96    0.38
 -10  -4   1    0.95    0.25
 -10  -4   1    1.56    0.31
  10   4   1    1.30    0.40
   4 -10   1    0.87    0.35
  -4  10   1    1.05    0.33
 -10  -4   1    1.72    0.39
 -10  -3  -1    3.09    0.46
  10   3  -1    3.38    0.55
  -3  10  -1    2.35    0.47
   3 -10  -1    2.90    0.52
  10   3  -1    3.25    0.36
 -10  -3  -1    3.07    0.44
  10   3   1    2.42    0.38
 -10  -3   1    3.66    0.46
  -3  10   1    3.10    0.52
 -10  -3   1    2.21    0.35
  10   3   1    3.30    0.55
   3 -10   1    2.69    0.47
 -10  -2  -1    2.26    0.40
   2 -10  -1    2.25    0.44
 -10  -2  -1    1.82    0.33
  10   2  -1    2.40    0.36
  -2  10  -1    1.96    0.42
  10   2  -1    2.00    0.45
  10   2   1    1.66    0.41
  10   2   1    2.74    0.40
 -10  -2   1    2.16    0.34
   2 -10   1    2.43    0.45
 -10  -2   1    3.18    0.49
  -2  10   1    2.44    0.44
  10   1  -1    1.49    0.29
   1 -10  -1    1.18    0.34
  -1  10  -1    1.35    0.34
  10   1  -1    1.09    0.32
 -10  -1  -1    0.81    0.26
 -10  -1  -1    1.62    0.34
  -1  10   1    1.25    0.34
  10   1   1    0.80    0.30
   1 -10   1    1.28    0.35
 -10  -1   1    0.99    0.24
 -10  -1   1    0.92    0.30
  10   1   1    1.05    0.22
  10   0  -1    1.91    0.44
   0  10  -1    1.66    0.16
   0 -10  -1    1.65    0.15
   0  10  -1    1.58    0.40
   0 -10  -1    2.52    0.47
  10   0  -1    1.73    0.31
 -10   0  -1    2.04    0.38
 -10   0  -1    1.70    0.34
   0  10   1    2.09    0.42
  10   0   1    2.21    0.37
 -10   0   1    2.28    0.39
 -10   0   1    1.62    0.31
   0 -10   1    2.11    0.43
  10   0   1    1.45    0.37
   0  10   1    1.62    0.15
  -1 -10  -1    1.12    0.31
  10  -1  -1    0.91    0.34
   1  10  -1    1.43    0.36
   1  10  -1    1.30    0.20
  -1 -10  -1    0.69    0.15
 -10   1  -1    1.36    0.36
 -10   1  -1    1.17    0.28
  10  -1  -1    1.33    0.30
 -10   1   1    0.82    0.23
  -1 -10   1    0.66    0.15
  10  -1   1    1.22    0.36
  10  -1   1    1.41    0.37
  -1 -10   1    1.17    0.31
 -10   1   1    1.41    0.34
   1  10   1    1.04    0.27
   1  10   1    1.24    0.21
 -10   2  -1    2.17    0.41
   2  10  -1    1.90    0.39
 -10   2  -1    2.26    0.40
  -2 -10  -1    2.53    0.44
  -2 -10  -1    1.72    0.26
  10  -2  -1    2.23    0.43
   2  10  -1    1.57    0.25
  10  -2  -1    1.67    0.38
  -2 -10   1    2.60    0.46
   2  10   1    2.45    0.31
 -10   2   1    2.31    0.45
 -10   2   1    2.02    0.35
   2  10   1    2.47    0.46
  -2 -10   1    1.97    0.28
  10  -2   1    2.69    0.46
 -10   3  -1    3.00    0.49
  -3 -10  -1    2.48    0.34
   3  10  -1    2.37    0.48
   3  10  -1    2.89    0.32
  10  -3  -1    4.09    0.56
 -10   3  -1    2.38    0.42
  -3 -10  -1    3.71    0.54
   3  10   1    3.33    0.54
 -10   3   1    2.33    0.40
  -3 -10   1    3.45    0.56
 -10   3   1    3.37    0.55
   3  10   1    2.83    0.32
  -3 -10   1    2.62    0.35
  10  -3   1    3.34    0.52
  -4 -10  -1    0.89    0.25
   4  10  -1    1.48    0.30
 -10   4  -1    1.05    0.31
  -4 -10  -1    1.48    0.38
  10  -4  -1    1.93    0.39
   4  10  -1    1.33    0.38
   4  10   1    0.98    0.30
  10  -4   1    1.01    0.33
  -4 -10   1    0.38    0.22
   4  10   1    1.08    0.27
 -10   4   1    1.07    0.31
  -4 -10   1    1.03    0.34
 -10   4   1    0.99    0.36
  10  -4   1    0.97    0.29
  -5 -10  -1    2.87    0.48
  10  -5  -1    3.35    0.59
  10  -5  -1    2.60    0.46
 -10   5  -1    2.57    0.46
   5  10  -1    2.86    0.49
   5  10  -1    2.86    0.45
  10  -5   1    3.05    0.53
  -5 -10   1    3.19    0.53
 -10   5   1    2.29    0.42
  10  -5   1    2.63    0.45
   5  10   1    3.21    0.57
   5  10   1    1.90    0.38
 -10   6  -1    1.52    0.37
  -6 -10  -1    1.33    0.38
  10  -6  -1    1.39    0.34
   6  10  -1    0.69    0.31
   6  10  -1    2.01    0.44
  10  -6  -1    1.58    0.44
   6  10   1    1.53    0.38
 -10   6   1    1.28    0.35
   6  10   1    1.55    0.40
  10  -6   1    1.44    0.35
  10  -6   1    1.69    0.43
  -6 -10   1    1.76    0.41
  10  -7  -1    1.20    0.44
 -10   7  -1    1.20    0.38
   7  10  -1    1.89    0.43
  -7 -10  -1    1.60    0.38
   7  10  -1    0.97    0.34
  10  -7  -1    1.22    0.28
   7  10   1    2.16    0.46
  10  -7   1    1.72    0.34
 -10   7   1    1.29    0.45
   7  10   1    1.35    0.39
  10  -8  -1    6.40    0.56
 -10   8  -1    4.96    0.64
  -8 -10  -1    7.53    0.70
   8  10  -1    5.85    0.69
  10  -8  -1    7.55    0.83
 -10   8  -1    6.93    0.72
  10  -8   1    6.28    0.56
 -10   8   1    5.93    0.64
   8  10   1    7.25    0.73
  -8 -10   1    7.96    0.77
 -10   8   1    5.28    0.62
  10  -8   1    6.34    0.71
  -9 -10  -1   13.08    0.98
 -10   9  -1   10.88    0.96
   9  10  -1   11.88    0.99
  10  -9  -1   11.13    0.74
 -10   9  -1   10.14    0.71
  -9 -10  -1   12.64    0.98
  10  -9  -1   14.36    1.12
  10  -9   1   12.40    0.77
 -10   9   1   11.71    0.95
 -10   9   1    9.42    0.71
   9  10   1   11.19    0.97
  10  -9   1   13.93    1.09
  -9 -10   1   12.58    0.99
  -9 -10   1   13.39    0.95
  10 -10  -1    2.55    0.64
 -10  10  -1    1.81    0.48
  10  10  -1    1.24    0.51
 -10 -10  -1    2.68    0.57
 -10 -10  -1    1.82    0.41
 -10  10  -1    0.91    0.32
  10 -10  -1    1.47    0.31
  10 -10   1    2.04    0.52
 -10  10   1    0.96    0.43
 -10  10   1    1.34    0.32
 -10 -10   1    1.84    0.48
  10 -10   1    1.03    0.29
  10  10   1    1.47    0.58
 -10  11  -1    0.79    0.29
  10 -11  -1    0.34    0.36
  11  10  -1    0.89    0.47
 -10  11  -1    0.96    0.42
 -11 -10  -1    0.71    0.37
 -11 -10  -1    1.01    0.39
  10 -11  -1    1.00    0.27
  11  10   1    1.43    0.51
 -10  11   1    0.56    0.38
 -10  11   1    1.47    0.30
  10 -11   1    0.97    0.26
  10 -11   1    0.98    0.41
 -11 -10   1    0.90    0.40
 -11 -10   1    1.01    0.40
 -11  -9  -1    3.94    0.62
 -11  -9  -1    3.72    0.61
  -9  11  -1    3.64    0.62
  11   9  -1    2.65    0.61
  -9  11  -1    2.78    0.33
   9 -11  -1    3.06    0.31
   9 -11  -1    3.07    0.62
  11   9   1    3.02    0.64
  -9  11   1    2.85    0.32
  -9  11   1    3.22    0.66
 -11  -9   1    3.86    0.58
   9 -11   1    2.98    0.31
   9 -11   1    3.61    0.71
 -11  -9   1    3.94    0.67
 -11  -8  -1    2.70    0.52
   8 -11  -1    2.61    0.57
 -11  -8  -1    2.74    0.54
   8 -11  -1    2.64    0.22
  11   8  -1    2.11    0.52
  -8  11  -1    2.40    0.50
  -8  11  -1    2.31    0.23
   8 -11  -1    2.10    0.22
 -11  -8   1    2.10    0.45
  11   8   1    2.46    0.52
 -11  -8   1    2.81    0.56
  -8  11   1    2.21    0.53
   8 -11   1    3.37    0.68
   8 -11   1    2.46    0.23
  11   7  -1    1.96    0.52
 -11  -7  -1    2.01    0.42
   7 -11  -1    2.60    0.51
 -11  -7  -1    1.20    0.37
  -7  11  -1    1.66    0.44
 -11  -7   1    2.41    0.44
   7 -11   1    2.25    0.50
 -11  -7   1    2.00    0.47
  -7  11   1    1.94    0.41
  11   7   1    1.07    0.47
 -11  -6  -1    0.28    0.24
   6 -11  -1    0.16    0.27
  11   6  -1    0.19    0.35
 -11  -6  -1    0.67    0.30
  -6  11  -1    0.12    0.29
  -6  11   1   -0.13    0.25
   6 -11   1    0.71    0.35
  11   6   1    0.37    0.37
 -11  -6   1    0.46    0.30
 -11  -6   1    0.09    0.24
   5 -11  -1    5.24    0.65
 -11  -5  -1    5.09    0.54
  -5  11  -1    3.57    0.63
 -11  -5  -1    4.70    0.54
  11   5  -1    3.88    0.64
 -11  -5   1    5.19    0.50
   5 -11   1    5.70    0.65
 -11  -5   1    5.89    0.61
  11   5   1    5.74    0.66
  -5  11   1    5.47    0.65
 -11  -4  -1    9.45    0.73
   4 -11  -1   11.25    0.92
  -4  11  -1   10.31    0.87
 -11  -4  -1   11.14    0.81
  11   4  -1    9.55    0.88
 -11  -4   1   11.56    0.86
   4 -11   1   11.96    0.93
 -11  -4   1    9.78    0.70
  -4  11   1   10.89    0.89
  11   4   1    9.18    0.87
 -11  -3  -1    2.67    0.45
  -3  11  -1    2.72    0.53
  11   3  -1    2.45    0.51
  11   3  -1    2.40    0.44
 -11  -3  -1    2.26    0.41
   3 -11  -1    2.02    0.49
 -11  -3   1    1.93    0.34
 -11  -3   1    2.64    0.48
   3 -11   1    2.30    0.51
  11   3   1    2.58    0.50
  -3  11   1    1.82    0.43
 -11  -2  -1    3.36    0.49
  11   2  -1    3.24    0.57
  11   2  -1    3.21    0.43
 -11  -2  -1    2.86    0.43
  -2  11  -1    3.95    0.62
   2 -11  -1    3.60    0.61
  11   2   1    2.97    0.57
   2 -11   1    3.11    0.54
 -11  -2   1    3.20    0.35
 -11  -2   1    3.65    0.57
  -2  11   1    2.05    0.45
  11   1  -1    1.33    0.32
   1 -11  -1    1.83    0.48
 -11  -1  -1    2.14    0.40
 -11  -1  -1    1.82    0.37
 -11  -1   1    1.96    0.37
 -11  -1   1    2.07    0.42
   1 -11   1    2.14    0.46
  -1  11   1    1.69    0.42
 -11   0  -1    6.13    0.60
 -11   0  -1    5.01    0.52
   0  11  -1    5.82    0.70
   0 -11  -1    6.86    0.76
  11   0  -1    6.08    0.63
 -11   0   1    4.89    0.49
  11   0   1    6.92    0.68
 -11   0   1    6.83    0.67
 -11   1  -1    2.41    0.45
   1  11  -1    1.40    0.37
  11  -1  -1    1.49    0.36
  -1 -11  -1    1.62    0.21
   1  11  -1    1.80    0.23
 -11   1  -1    1.51    0.35
  -1 -11  -1    2.17    0.46
 -11   1   1    1.69    0.41
  -1 -11   1    1.42    0.21
   1  11   1    1.94    0.23
  11  -1   1    1.36    0.36
 -11   1   1    1.60    0.34
   2  11  -1    3.41    0.34
  11  -2  -1    4.13    0.61
   2  11  -1    3.18    0.53
 -11   2  -1    2.76    0.45
  -2 -11  -1    3.96    0.59
 -11   2  -1    4.14    0.50
  -2 -11  -1    2.85    0.30
 -11   2   1    2.28    0.42
  11  -2   1    2.62    0.49
  -2 -11   1    2.69    0.31
 -11   2   1    2.25    0.52
   2  11   1    2.87    0.32
  11  -3  -1    2.35    0.46
   3  11  -1    2.22    0.46
  -3 -11  -1    2.45    0.45
 -11   3  -1    2.97    0.51
   3  11  -1    2.16    0.34
 -11   3  -1    1.78    0.41
  -3 -11  -1    1.67    0.33
  -3 -11   1    2.78    0.63
 -11   3   1    2.40    0.41
 -11   3   1    3.62    0.60
   3  11   1    2.68    0.36
  -3 -11   1    1.41    0.33
  11  -3   1    2.49    0.48
   4  11  -1    9.78    0.81
   4  11  -1    9.79    0.68
  11  -4  -1    9.90    0.78
  -4 -11  -1   10.37    0.84
  -4 -11  -1    9.05    0.65
 -11   4  -1    9.23    0.76
  11  -4   1    8.91    0.76
   4  11   1   10.11    0.69
  -4 -11   1   10.80    0.84
 -11   4   1    8.71    0.72
  -4 -11   1    7.47    0.62
  11  -4   1   12.17    0.92
 -11   4   1   11.39    0.90
  11  -5  -1    5.47    0.78
   5  11  -1    5.08    0.58
 -11   5  -1    4.17    0.61
  11  -5  -1    4.92    0.53
   5  11  -1    4.15    0.54
  11  -5   1    5.26    0.56
   5  11   1    3.89    0.53
 -11   5   1    3.70    0.56
  -5 -11   1    5.47    0.63
   5  11   1    4.56    0.65
  11  -5   1    5.49    0.64
  -6 -11  -1    0.64    0.30
  11  -6  -1    0.76    0.34
 -11   6  -1    0.18    0.26
  11  -6  -1    0.31    0.25
   6  11  -1    0.31    0.26
   6  11   1    0.33    0.32
   6  11   1    0.10    0.27
  -6 -11   1    1.13    0.37
 -11   6   1    0.32    0.24
  11  -6   1    0.13    0.22
  -7 -11  -1    1.57    0.43
  11  -7  -1    2.23    0.58
  11  -7  -1    2.16    0.41
   7  11  -1    1.30    0.42
 -11   7  -1    1.72    0.44
   7  11  -1    1.30    0.37
 -11   7   1    1.61    0.41
  11  -7   1    1.74    0.39
   7  11   1    1.80    0.44
  -7 -11   1    2.01    0.46
  11  -7   1    2.74    0.55
   7  11   1    1.50    0.40
  11  -8  -1    2.49    0.60
   8  11  -1    2.78    0.66
  -8 -11  -1    1.68    0.44
  11  -8  -1    2.64    0.47
 -11   8  -1    2.26    0.52
   8  11  -1    2.59    0.53
 -11   8   1    2.94    0.56
  11  -8   1    1.65    0.48
   8  11   1    3.86    0.79
  11  -8   1    2.60    0.47
  -8 -11   1    3.49    0.59
  -9 -11  -1    2.82    0.56
  11  -9  -1    3.12    0.47
 -11   9  -1    3.32    0.65
   9  11  -1    2.40    0.54
  11  -9  -1    3.84    0.72
  -9 -11  -1    3.60    0.64
  11  -9   1    3.07    0.46
   9  11   1    2.41    0.56
  -9 -11   1    3.26    0.55
  11  -9   1    3.20    0.62
 -11   9   1    2.80    0.56
  -9 -11   1    3.77    0.65
  11 -10  -1    1.34    0.54
 -10 -11  -1    1.05    0.44
  11 -10  -1    1.57    0.32
  10  11  -1    1.30    0.47
 -10 -11  -1    1.32    0.45
 -11  10  -1    1.20    0.43
  10  11   1    1.36    0.51
  11 -10   1    1.28    0.31
 -10 -11   1    0.74    0.40
 -10 -11   1    1.13    0.41
 -11  10   1    1.33    0.43
  11 -10   1    0.84    0.40
  11  11  -1    0.38    0.44
 -11 -11  -1    0.21    0.35
 -11  11  -1    0.60    0.40
 -11  11  -1    0.19    0.31
  11 -11  -1    0.36    0.37
  11 -11  -1    0.08    0.24
 -11 -11  -1   -0.12    0.33
  11  11   1    0.13    0.38
  11 -11   1    0.09    0.25
 -11 -11   1    0.17    0.34
 -11 -11   1   -0.13    0.36
 -11  11   1   -0.15    0.34
 -11  11   1   -0.63    0.31
  11 -11   1    0.07    0.40
  11 -12  -1    0.96    0.26
 -11  12  -1    0.10    0.31
  12  11  -1    0.32    0.41
 -12 -11  -1    0.20    0.38
  11 -12  -1    1.15    0.53
 -12 -11  -1    1.14    0.39
 -11  12  -1    0.60    0.44
  11 -12   1    0.62    0.25
 -11  12   1    0.86    0.45
 -11  12   1    0.09    0.31
  11 -12   1    0.50    0.44
 -12 -11   1    0.83    0.42
 -12 -11   1    0.50    0.45
  12  11   1    1.07    0.56
 -12 -10  -1    2.32    0.56
 -10  12  -1    2.43    0.58
  12  10  -1    1.67    0.56
 -10  12  -1    1.67    0.29
 -12 -10  -1    1.69    0.50
  10 -12  -1    2.04    0.26
  10 -12  -1    2.63    0.66
 -12 -10   1    3.05    0.64
 -12 -10   1    2.07    0.50
 -10  12   1    2.57    0.64
  10 -12   1    2.55    0.63
  10 -12   1    1.77    0.25
  12  10   1    2.34    0.63
  -9  12  -1    0.77    0.37
 -12  -9  -1    2.27    0.53
 -12  -9  -1    1.40    0.44
  12   9  -1    1.46    0.50
   9 -12  -1    1.45    0.51
 -12  -9   1    1.33    0.47
   9 -12   1    1.46    0.50
  -9  12   1    1.66    0.47
  12   9   1    1.59    0.49
  12   8  -1    6.69    0.94
 -12  -8  -1    8.00    0.77
   8 -12  -1    9.13    0.92
 -12  -8  -1    6.88    0.88
  -8  12  -1    7.80    0.84
 -12  -8   1    7.89    0.72
   8 -12   1    9.18    0.91
  12   8   1    6.34    0.89
  -8  12   1    6.94    0.79
 -12  -8   1    8.33    0.83
 -12  -7  -1    5.00    0.61
   7 -12  -1    4.09    0.73
  -7  12  -1    5.04    0.80
 -12  -7  -1    3.52    0.56
  12   7  -1    4.12    0.77
  12   7   1    3.33    0.66
 -12  -7   1    4.06    0.56
   7 -12   1    4.22    0.77
 -12  -7   1    5.13    0.76
  -7  12   1    3.98    0.69
 -12  -6  -1    7.16    0.66
  -6  12  -1    4.95    0.73
  12   6  -1    4.51    0.78
   6 -12  -1    6.75    0.76
 -12  -6  -1    7.55    0.71
 -12  -6   1    5.95    0.57
   6 -12   1    6.69    0.74
 -12  -6   1    6.88    0.72
  -6  12   1    4.13    0.68
  12   6   1    3.78    0.69
   5 -12  -1    2.03    0.50
 -12  -5  -1    1.29    0.37
 -12  -5  -1    1.74    0.37
  12   5  -1    2.52    0.54
  -5  12  -1    1.72    0.41
  -5  12   1    1.70    0.44
 -12  -5   1    2.09    0.40
 -12  -5   1    2.10    0.46
   5 -12   1    2.34    0.51
  12   5   1    2.17    0.50
  12   4  -1    1.98    0.50
 -12  -4  -1    1.97    0.39
   4 -12  -1    1.65    0.45
 -12  -4  -1    1.64    0.41
  -4  12  -1    2.10    0.51
   4 -12   1    2.09    0.47
  12   4   1    2.79    0.59
  -4  12   1    1.65    0.41
 -12  -4   1    1.92    0.46
 -12  -4   1    1.48    0.36
 -12  -3  -1    3.43    0.50
   3 -12  -1    3.40    0.58
  12   3  -1    3.31    0.63
  -3  12  -1    3.72    0.59
 -12  -3  -1    4.74    0.56
  12   3   1    3.61    0.63
 -12  -3   1    4.67    0.57
 -12  -3   1    3.18    0.47
  -3  12   1    2.33    0.52
   3 -12   1    4.91    0.74
 -12  -2  -1    9.79    0.80
  12   2  -1   10.19    0.90
   2 -12  -1   10.41    0.90
 -12  -2  -1    8.85    0.71
  -2  12  -1    9.39    0.86
 -12  -2   1    9.45    0.70
  -2  12   1    9.49    0.85
   2 -12   1   10.05    0.87
 -12  -2   1   10.24    0.83
  12   2   1   10.27    0.90
 -12  -1  -1    3.37    0.51
 -12  -1  -1    4.99    0.56
  -1  12  -1    3.83    0.60
   1 -12  -1    4.95    0.60
  12   1  -1    4.58    0.69
  -1  12   1    4.15    0.65
  12   1   1    3.43    0.60
 -12  -1   1    4.00    0.46
   1 -12   1    5.88    0.65
 -12  -1   1    5.58    0.62
   0 -12  -1    2.63    0.51
 -12   0  -1    2.41    0.48
   0  12  -1    2.44    0.48
 -12   0  -1    1.82    0.41
  12   0  -1    2.66    0.56
  12   0   1    2.19    0.48
   0 -12   1    3.30    0.59
   0  12   1    1.94    0.45
 -12   0   1    1.66    0.36
 -12   0   1    3.08    0.51
  -1 -12  -1    4.65    0.58
 -12   1  -1    5.04    0.57
   1  12  -1    4.27    0.65
 -12   1  -1    4.32    0.51
   1  12  -1    4.15    0.32
  -1 -12  -1    3.65    0.30
  12  -1  -1    5.20    0.72
 -12   1   1    4.65    0.68
   1  12   1    4.54    0.69
  -1 -12   1    3.65    0.31
 -12   1   1    4.12    0.47
   1  12   1    4.55    0.33
  -1 -12   1    5.01    0.61
  12  -1   1    4.02    0.62
  -2 -12  -1    9.80    0.82
   2  12  -1    9.99    0.83
   2  12  -1    9.20    0.57
 -12   2  -1    7.92    0.71
  -2 -12  -1    8.13    0.53
 -12   2  -1   10.88    0.85
  12  -2  -1    8.79    0.79
 -12   2   1    8.07    0.68
 -12   2   1   10.84    0.90
  -2 -12   1    9.99    0.85
  12  -2   1    8.70    0.79
  -2 -12   1    8.19    0.53
   2  12   1    9.56    0.58
   2  12   1   10.35    0.88
  -3 -12  -1    3.53    0.58
   3  12  -1    4.03    0.63
  12  -3  -1    3.85    0.69
 -12   3  -1    3.36    0.56
 -12   3  -1    5.20    0.59
   3  12  -1    4.36    0.42
 -12   3   1    4.15    0.64
   3  12   1    3.52    0.39
  -3 -12   1    3.70    0.61
  12  -3   1    3.86    0.70
   3  12   1    4.08    0.66
 -12   3   1    3.93    0.55
 -12   4  -1    1.35    0.36
   4  12  -1    1.62    0.34
  -4 -12  -1    1.62    0.33
  12  -4  -1    1.15    0.38
   4  12  -1    1.47    0.41
  -4 -12  -1    1.66    0.44
 -12   4   1    0.92    0.34
  -4 -12   1    1.13    0.32
  12  -4   1    1.42    0.45
  12  -4   1    2.29    0.52
  -4 -12   1    1.79    0.47
   4  12   1    1.37    0.31
 -12   4   1    1.93    0.55
   4  12   1    1.18    0.38
   5  12  -1    2.05    0.44
 -12   5  -1    1.55    0.40
   5  12  -1    1.69    0.42
  -5 -12  -1    2.39    0.53
  12  -5  -1    1.75    0.42
  12  -5  -1    1.53    0.38
   5  12   1    1.60    0.39
 -12   5   1    1.62    0.42
   5  12   1    2.85    0.57
  -5 -12   1    2.13    0.52
  12  -5   1    2.10    0.47
  -6 -12  -1    6.20    0.72
  12  -6  -1    7.33    0.82
   6  12  -1    5.11    0.65
  12  -6  -1    7.14    0.68
   6  12  -1    5.34    0.77
 -12   6  -1    6.22    0.65
   6  12   1    6.49    0.63
  -6 -12   1    7.51    0.79
 -12   6   1    5.72    0.66
  12  -6   1    6.65    0.66
  12  -6   1    5.72    0.73
   6  12   1    4.66    0.71
  -7 -12  -1    4.69    0.70
  12  -7  -1    4.36    0.77
 -12   7  -1    3.77    0.63
   7  12  -1    3.68    0.55
  12  -7  -1    3.44    0.56
   7  12  -1    4.81    0.70
  12  -7   1    4.25    0.72
 -12   7   1    3.18    0.58
   7  12   1    4.27    0.61
  -7 -12   1    3.91    0.69
   7  12   1    3.32    0.59
  12  -7   1    3.53    0.53
   8  12  -1    9.61    0.84
  12  -8  -1    8.01    0.70
  12  -8  -1    7.00    0.86
 -12   8  -1    6.79    0.75
  -8 -12  -1    9.88    0.87
   8  12  -1    8.19    0.82
  -8 -12   1    8.16    0.86
   8  12   1    8.20    0.84
 -12   8   1    7.11    0.77
  12  -8   1    8.22    0.87
  12  -8   1    6.97    0.67
   8  12   1    7.90    0.79
  12  -9  -1    1.51    0.54
 -12   9  -1    1.28    0.46
  12  -9  -1    1.63    0.39
  -9 -12  -1    2.13    0.52
  -9 -12  -1    1.45    0.48
   9  12  -1    2.24    0.55
  -9 -12   1    1.60    0.52
  -9 -12   1    1.85    0.49
  12  -9   1    1.04    0.35
   9  12   1    1.79    0.55
  12  -9   1    1.92    0.55
 -12   9   1    1.78    0.50
  10  12  -1    2.55    0.62
  12 -10  -1    1.80    0.42
 -10 -12  -1    2.32    0.51
  12 -10  -1    2.90    0.72
 -12  10  -1    1.92    0.54
 -10 -12  -1    1.76    0.44
  12 -10   1    2.14    0.44
  12 -10   1    1.80    0.50
 -12  10   1    1.93    0.52
 -10 -12   1    1.96    0.53
  10  12   1    2.06    0.58
 -10 -12   1    1.60    0.50
 -12  11  -1    0.78    0.45
 -11 -12  -1    0.79    0.41
  11  12  -1    0.72    0.48
  12 -11  -1    0.71    0.51
 -11 -12  -1    0.44    0.41
  12 -11  -1    0.77    0.36
 -12  11   1    0.72    0.42
  12 -11   1    0.55    0.44
 -11 -12   1    0.54    0.45
 -11 -12   1    1.10    0.46
  11  12   1    1.93    0.60
  12 -11   1    0.64    0.32
 -12 -12  -1    0.49    0.41
  12 -12  -1   -0.15    0.27
 -12 -12  -1    0.10    0.41
  12  12  -1    0.51    0.49
  12 -12  -1   -0.51    0.74
 -12 -12   1   -0.26    0.39
  12 -12   1    0.17    0.45
 -12 -12   1    0.07    0.43
  12  12   1   -0.12    0.47
 -12  12   1    0.53    0.44
  12 -12   1    0.05    0.28
 -13 -12  -1    6.51    0.92
 -12  13  -1    5.89    0.95
 -13 -12  -1    9.58    0.99
  12 -13  -1    9.00    1.05
 -13 -12   1    7.37    0.85
  12 -13   1    7.24    0.81
  12 -13   1    9.81    1.13
 -12  13   1    6.66    1.02
 -13 -12   1   10.30    1.08
 -13 -11  -1    4.67    0.75
 -11  13  -1    3.93    0.77
  11 -13  -1    6.88    1.04
  13  11  -1    6.33    1.04
 -13 -11  -1    4.68    0.81
  11 -13  -1    5.21    0.54
  11 -13   1    5.19    0.56
 -13 -11   1    5.14    0.88
  11 -13   1    6.34    1.18
 -13 -11   1    5.17    0.75
  13  11   1    4.17    0.85
  13  10  -1    2.16    0.71
  10 -13  -1    2.24    0.61
 -13 -10  -1    2.31    0.61
 -10  13  -1    1.62    0.55
 -13 -10  -1    1.85    0.54
  10 -13   1    2.08    0.60
 -13 -10   1    2.01    0.64
 -10  13   1    2.23    0.58
  13  10   1    1.81    0.59
 -13 -10   1    1.59    0.48
 -13  -9  -1    1.88    0.51
  13   9  -1    1.10    0.57
 -13  -9  -1    2.09    0.59
   9 -13  -1    2.12    0.58
  -9  13  -1    2.37    0.60
 -13  -9   1    1.89    0.47
   9 -13   1    1.73    0.60
  -9  13   1    1.79    0.54
 -13  -9   1    1.89    0.54
  13   9   1    2.35    0.69
 -13  -8  -1    2.76    0.56
  -8  13  -1    2.73    0.58
   8 -13  -1    2.58    0.66
 -13  -8  -1    3.01    0.59
  13   8  -1    2.98    0.67
   8 -13   1    3.16    0.66
  13   8   1    3.62    0.72
 -13  -8   1    2.77    0.62
 -13  -8   1    2.98    0.59
  -8  13   1    2.52    0.61
   7 -13  -1    2.53    0.57
 -13  -7  -1    2.66    0.54
  -7  13  -1    2.03    0.51
  13   7  -1    2.30    0.56
 -13  -7  -1    2.25    0.48
  13   7   1    2.46    0.60
  -7  13   1    2.23    0.54
   7 -13   1    2.72    0.65
 -13  -7   1    1.89    0.55
 -13  -7   1    2.03    0.43
  13   6  -1    3.08    0.69
 -13  -6  -1    4.62    0.64
   6 -13  -1    4.31    0.77
  -6  13  -1    3.70    0.70
 -13  -6  -1    4.20    0.64
  -6  13   1    3.47    0.67
  13   6   1    2.88    0.65
 -13  -6   1    4.02    0.69
   6 -13   1    4.62    0.78
 -13  -6   1    3.59    0.56
   5 -13  -1    0.18    0.32
 -13  -5  -1    0.01    0.26
 -13  -5  -1    0.01    0.26
  13   5  -1   -0.22    0.32
   5 -13   1    0.23    0.32
 -13  -5   1   -0.03    0.22
  13   5   1   -0.08    0.27
  -5  13   1    0.00    0.28
 -13  -5   1    0.17    0.33
   4 -13  -1   -0.04    0.27
  -4  13  -1    0.23    0.31
 -13  -4  -1    0.08    0.27
 -13  -4  -1    0.18    0.24
  13   4  -1    0.11    0.36
  13   4   1   -0.20    0.31
 -13  -4   1    0.26    0.28
  -4  13   1    0.12    0.26
   4 -13   1    0.30    0.28
 -13  -4   1    0.12    0.26
 -13  -3  -1    0.44    0.30
   3 -13  -1    0.13    0.27
  13   3  -1    0.38    0.34
  -3  13  -1    0.12    0.31
 -13  -3  -1    0.29    0.27
   3 -13   1    0.65    0.38
 -13  -3   1    0.60    0.27
  13   3   1    0.42    0.39
  -3  13   1    0.32    0.31
 -13  -3   1   -0.05    0.27
 -13  -2  -1    1.55    0.35
   2 -13  -1    2.59    0.55
  13   2  -1    1.62    0.51
  -2  13  -1    1.56    0.47
 -13  -2  -1    1.84    0.43
 -13  -2   1    1.49    0.43
   2 -13   1    1.53    0.45
 -13  -2   1    1.93    0.37
  13   2   1    1.41    0.46
  -2  13   1    2.15    0.52
  13   1  -1    5.30    0.80
  -1  13  -1    4.41    0.68
 -13  -1  -1    4.96    0.69
 -13  -1  -1    3.40    0.53
   1 -13  -1    4.59    0.72
  -1  13   1    4.24    0.67
 -13  -1   1    4.95    0.73
 -13  -1   1    5.05    0.54
   1 -13   1    4.76    0.70
  13   1   1    5.37    0.81
   0 -13  -1    2.08    0.48
 -13   0  -1    2.21    0.46
  13   0  -1    2.38    0.53
 -13   0  -1    2.41    0.43
   0  13  -1    2.13    0.48
 -13   0   1    2.07    0.40
   0  13   1    1.82    0.47
  13   0   1    2.62    0.55
   0 -13   1    1.92    0.48
 -13   0   1    2.70    0.58
 -13   1  -1    4.59    0.52
 -13   1  -1    5.68    0.64
  -1 -13  -1    5.59    0.68
  13  -1  -1    3.26    0.63
   1  13  -1    5.60    0.66
   1  13  -1    4.55    0.32
  -1 -13  -1    3.93    0.30
 -13   1   1    5.23    0.77
   1  13   1    4.38    0.31
  13  -1   1    6.15    0.85
 -13   1   1    4.91    0.52
  -1 -13   1    5.03    0.61
   1  13   1    4.07    0.70
 -13   2  -1    1.93    0.40
  13  -2  -1    2.92    0.58
   2  13  -1    1.98    0.31
 -13   2  -1    2.26    0.52
  -2 -13  -1    1.96    0.26
   2  13  -1    2.06    0.49
  -2 -13  -1    1.75    0.46
 -13   2   1    1.39    0.36
 -13   2   1    2.30    0.61
  13  -2   1    1.91    0.46
   2  13   1    1.46    0.41
  -2 -13   1    2.44    0.51
   2  13   1    1.74    0.30
  -2 -13   1    1.63    0.26
  -3 -13  -1    0.14    0.26
 -13   3  -1    0.26    0.32
   3  13  -1    0.36    0.24
   3  13  -1    0.30    0.30
  13  -3  -1    0.02    0.32
   3  13   1    0.09    0.28
 -13   3   1    0.42    0.31
 -13   3   1    0.21    0.25
  -3 -13   1    0.66    0.30
  13  -3   1    0.66    0.40
   3  13   1    0.04    0.22
   4  13  -1    0.35    0.26
  -4 -13  -1    0.18    0.25
  -4 -13  -1    0.26    0.27
   4  13  -1    0.25    0.27
 -13   4  -1   -0.06    0.29
  13  -4  -1    0.03    0.25
  13  -4   1    0.48    0.30
  13  -4   1    0.35    0.30
   4  13   1    0.54    0.27
 -13   4   1    0.26    0.27
   4  13   1    0.09    0.29
 -13   4   1    0.38    0.28
  -4 -13   1    0.44    0.26
  -4 -13   1    0.13    0.32
   5  13  -1   -0.07    0.28
  -5 -13  -1    0.24    0.32
  13  -5  -1    0.09    0.34
  13  -5  -1    0.09    0.30
   5  13  -1   -0.11    0.28
 -13   5  -1    0.05    0.27
  13  -5   1    0.26    0.32
  -5 -13   1   -0.08    0.29
  13  -5   1   -0.10    0.29
   5  13   1    0.31    0.34
   5  13   1   -0.07    0.27
 -13   5   1    0.00    0.26
 -13   6  -1    3.83    0.66
   6  13  -1    3.62    0.58
  -6 -13  -1    4.38    0.73
   6  13  -1    3.98    0.68
  13  -6  -1    4.89    0.79
  13  -6  -1    4.20    0.66
   6  13   1    4.14    0.70
  -6 -13   1    4.40    0.72
  13  -6   1    3.76    0.63
  13  -6   1    5.58    0.83
 -13   6   1    3.98    0.65
   6  13   1    4.25    0.59
  -7 -13  -1    3.05    0.60
   7  13  -1    1.91    0.50
  13  -7  -1    1.88    0.46
  13  -7  -1    2.56    0.63
 -13   7  -1    1.90    0.54
   7  13  -1    2.36    0.52
   7  13   1    2.77    0.57
   7  13   1    2.21    0.51
  13  -7   1    3.45    0.70
 -13   7   1    2.30    0.52
  -7 -13   1    1.98    0.52
  13  -7   1    3.05    0.55
  -8 -13  -1    2.85    0.58
  13  -8  -1    4.02    0.79
  13  -8  -1    3.28    0.62
   8  13  -1    2.04    0.54
 -13   8  -1    3.19    0.63
   8  13  -1    2.56    0.57
   8  13   1    3.09    0.68
  13  -8   1    3.85    0.74
 -13   8   1    2.18    0.54
  13  -8   1    2.66    0.57
   8  13   1    2.97    0.63
  -8 -13   1    3.71    0.66
  -9 -13  -1    2.36    0.55
 -13   9  -1    2.19    0.60
  13  -9  -1    2.52    0.64
  13  -9  -1    2.77    0.51
  -9 -13  -1    2.58    0.58
   9  13  -1    1.50    0.53
  13  -9   1    1.77    0.42
   9  13   1    1.75    0.56
  -9 -13   1    1.45    0.51
 -13   9   1    1.98    0.54
  13  -9   1    2.67    0.66
  13 -10  -1    3.10    0.70
 -10 -13  -1    2.03    0.53
  13 -10  -1    1.29    0.41
  10  13  -1    2.03    0.59
 -10 -13  -1    2.06    0.57
 -13  10  -1    2.00    0.55
  13 -10   1    1.22    0.40
 -13  10   1    1.29    0.48
  13 -10   1    2.17    0.63
  10  13   1    1.28    0.51
 -10 -13   1    3.03    0.66
 -10 -13   1    1.33    0.48
 -11 -13  -1    5.69    0.89
  13 -11  -1    5.87    1.11
  11  13  -1    6.00    0.94
 -13  11  -1    4.03    0.76
 -11 -13  -1    6.65    0.97
  13 -11  -1    6.12    0.61
 -11 -13   1    6.80    0.98
  13 -11   1    6.58    1.01
 -13  11   1    5.56    0.90
  13 -11   1    5.01    0.61
  11  13   1    4.94    0.85
 -11 -13   1    6.07    0.89
  13 -12  -1    6.50    0.66
 -12 -13  -1   10.30    1.04
 -13  12  -1    8.22    0.95
  13 -12  -1    9.83    1.17
 -12 -13  -1    8.92    0.97
  12  13  -1    6.81    1.09
  13 -12   1    7.12    0.66
  13 -12   1    8.63    1.19
  12  13   1    6.49    1.03
 -13  12   1    6.27    0.98
 -12 -13   1    8.75    1.00
 -12 -13   1    8.43    0.91
 -13  13  -1    7.37    1.11
  13 -13  -1   10.71    1.24
  13  13  -1    5.13    0.96
 -13 -13  -1    9.24    1.01
 -13 -13  -1    7.89    0.99
  13  13   1    7.94    1.17
 -13  13   1    7.99    1.09
 -13 -13   1    6.90    0.96
 -13 -13   1    9.81    1.10
  13 -13   1    8.97    1.25
 -14 -13  -1    4.97    0.89
  13 -14  -1    5.93    1.08
  14  13  -1    4.41    0.90
 -14 -13  -1    5.46    0.94
 -13  14  -1    4.60    0.86
  14  13   1    4.19    0.90
 -13  14   1    4.88    0.92
 -14 -13   1    6.26    1.06
  13 -14   1    4.03    0.87
 -14 -13   1    4.86    0.83
 -12  14  -1    0.62    0.55
  14  12  -1   -0.02    0.50
 -14 -12  -1    0.83    0.51
  12 -14  -1    0.42    0.54
 -14 -12  -1    0.23    0.52
 -14 -12   1    0.24    0.52
  14  12   1    0.28    0.63
 -12  14   1    1.49    0.61
 -14 -12   1    0.85    0.57
  12 -14   1    0.35    0.51
 -14 -11  -1    2.80    0.66
  11 -14  -1    3.92    0.78
 -14 -11  -1    1.71    0.65
 -11  14  -1    2.59    0.74
  14  11  -1    2.75    0.79
  11 -14   1    2.74    0.75
 -11  14   1    3.42    0.70
 -14 -11   1    2.44    0.68
  14  11   1    3.33    0.78
 -14 -11   1    3.08    0.71
 -14 -10  -1    2.57    0.61
 -14 -10  -1    2.78    0.70
  10 -14  -1    3.59    0.81
 -10  14  -1    2.63    0.60
  14  10  -1    3.05    0.81
  10 -14   1    3.62    0.78
 -10  14   1    4.01    0.79
 -14 -10   1    3.34    0.65
  14  10   1    2.46    0.80
 -14 -10   1    3.35    0.72
 -14  -9  -1    0.48    0.44
 -14  -9  -1    1.18    0.50
   9 -14  -1    0.37    0.41
  14   9  -1    0.76    0.49
  -9  14  -1    0.55    0.43
 -14  -9   1    0.35    0.44
  14   9   1    0.52    0.50
 -14  -9   1    0.44    0.38
 -14  -8  -1    2.38    0.57
 -14  -8  -1    1.58    0.50
   8 -14  -1    1.86    0.61
  14   8  -1    2.40    0.62
  -8  14  -1    0.96    0.42
 -14  -8   1    1.35    0.55
  -8  14   1    1.01    0.49
 -14  -8   1    1.31    0.40
   8 -14   1    1.95    0.57
  14   8   1    0.81    0.48
  14   7  -1    1.38    0.60
 -14  -7  -1    2.99    0.57
  -7  14  -1    2.91    0.61
   7 -14  -1    2.82    0.66
 -14  -7  -1    2.27    0.57
   7 -14   1    1.44    0.53
 -14  -7   1    2.04    0.56
  14   7   1    3.56    0.73
  -7  14   1    2.00    0.60
 -14  -7   1    2.52    0.58
 -14  -6  -1    9.28    0.85
 -14  -6  -1    6.49    0.72
   6 -14  -1   10.56    1.00
  -6  14  -1    7.75    0.85
  14   6  -1    6.00    0.90
 -14  -6   1    7.24    0.70
   6 -14   1   10.14    0.97
  14   6   1    6.67    0.96
 -14  -6   1    8.09    0.87
  -6  14   1    7.32    0.84
 -14  -5  -1    2.43    0.59
  -5  14  -1    2.62    0.57
   5 -14  -1    3.61    0.69
  14   5  -1    3.91    0.80
   5 -14   1    3.31    0.68
 -14  -5   1    3.63    0.67
  14   5   1    2.27    0.60
  -5  14   1    2.99    0.65
 -14  -5   1    2.69    0.48
  14   4  -1    4.30    0.82
 -14  -4  -1    4.11    0.67
 -14  -4  -1    4.00    0.61
  -4  14  -1    3.45    0.68
   4 -14  -1    3.95    0.72
 -14  -4   1    3.62    0.54
   4 -14   1    3.81    0.69
  -4  14   1    3.41    0.65
 -14  -4   1    4.04    0.66
  14   4   1    2.49    0.60
 -14  -3  -1    4.11    0.65
 -14  -3  -1    3.23    0.54
   3 -14  -1    3.45    0.70
  -3  14  -1    3.77    0.72
  14   3  -1    2.67    0.62
  -3  14   1    4.10    0.73
  14   3   1    3.18    0.66
 -14  -3   1    3.56    0.54
 -14  -3   1    3.60    0.64
   3 -14   1    3.31    0.66
 -14  -2  -1    0.05    0.26
 -14  -2  -1    0.67    0.37
   2 -14  -1    0.32    0.27
  -2  14  -1   -0.03    0.29
  14   2  -1    0.07    0.34
   2 -14   1    0.15    0.33
 -14  -2   1    0.29    0.29
 -14  -2   1    0.04    0.28
  -2  14   1    0.24    0.32
  14   2   1   -0.26    0.35
 -14  -1  -1    1.84    0.43
  -1  14  -1    1.95    0.51
   1 -14  -1    1.22    0.38
  14   1  -1    1.80    0.52
 -14  -1  -1    2.01    0.49
 -14  -1   1    2.04    0.43
  14   1   1    1.53    0.46
   1 -14   1    1.21    0.44
  -1  14   1    1.80    0.51
 -14  -1   1    1.85    0.51
 -14   0  -1    3.01    0.52
 -14   0  -1    2.99    0.56
   0 -14  -1    3.57    0.66
  14   0  -1    3.30    0.65
   0  14  -1    2.99    0.63
  14   0   1    3.06    0.62
 -14   0   1    3.42    0.62
   0  14   1    2.70    0.58
   0 -14   1    3.61    0.67
 -14   0   1    2.69    0.49
 -14   1  -1    2.41    0.55
   1  14  -1    2.56    0.58
  14  -1  -1    2.06    0.52
  -1 -14  -1    1.67    0.46
   1  14   1    2.35    0.57
  -1 -14   1    1.55    0.48
 -14   1   1    1.75    0.48
 -14   1   1    0.92    0.38
  14  -1   1    0.95    0.39
 -14   2  -1   -0.17    0.26
  -2 -14  -1    0.08    0.19
 -14   2  -1    0.08    0.29
   2  14  -1   -0.11    0.29
  -2 -14  -1   -0.08    0.29
   2  14  -1   -0.10    0.17
  14  -2  -1    0.08    0.30
   2  14   1    0.46    0.20
  -2 -14   1    0.85    0.38
  14  -2   1   -0.05    0.30
 -14   2   1    0.27    0.35
   2  14   1   -0.09    0.31
  -2 -14   1    0.07    0.19
 -14   2   1    0.11    0.27
  -3 -14  -1    4.15    0.69
 -14   3  -1    3.57    0.60
 -14   3  -1    4.26    0.71
  14  -3  -1    3.36    0.63
   3  14  -1    3.45    0.43
   3  14  -1    4.07    0.72
   3  14   1    2.81    0.40
  14  -3   1    4.21    0.70
 -14   3   1    4.16    0.72
   3  14   1    3.52    0.70
  -3 -14   1    3.65    0.68
 -14   4  -1    3.07    0.56
   4  14  -1    3.67    0.49
  -4 -14  -1    2.01    0.41
  -4 -14  -1    3.03    0.59
  14  -4  -1    3.44    0.64
   4  14  -1    2.49    0.56
   4  14   1    3.70    0.68
  -4 -14   1    4.82    0.74
  -4 -14   1    2.51    0.41
 -14   4   1    3.40    0.59
  14  -4   1    4.13    0.73
 -14   4   1    5.19    0.84
  14  -4   1    2.74    0.58
   4  14   1    3.72    0.49
 -14   5  -1    3.04    0.58
   5  14  -1    2.80    0.62
   5  14  -1    3.14    0.51
  -5 -14  -1    3.07    0.61
  14  -5  -1    3.61    0.65
  14  -5  -1    3.30    0.70
 -14   5   1    2.92    0.55
   5  14   1    3.05    0.50
  14  -5   1    3.09    0.59
   5  14   1    3.27    0.67
  -5 -14   1    3.26    0.64
  14  -5   1    3.99    0.73
   6  14  -1    8.51    0.79
   6  14  -1    8.74    0.92
  14  -6  -1    8.66    0.86
  -6 -14  -1    9.20    0.90
 -14   6  -1    8.61    0.87
  14  -6  -1    8.90    0.98
 -14   6   1    8.89    0.84
   6  14   1    9.46    0.97
   6  14   1    9.71    0.82
  14  -6   1    9.83    0.89
  -6 -14   1    8.65    0.90
  14  -6   1    9.00    0.95
  14  -7  -1    1.62    0.50
 -14   7  -1    1.88    0.56
  14  -7  -1    3.83    0.81
   7  14  -1    3.06    0.66
  -7 -14  -1    1.82    0.52
   7  14   1    2.14    0.57
  -7 -14   1    2.89    0.57
  14  -7   1    1.62    0.61
  14  -7   1    2.61    0.54
 -14   7   1    2.20    0.54
   8  14  -1    1.36    0.50
  14  -8  -1    1.23    0.47
 -14   8  -1    1.63    0.48
  -8 -14  -1    1.74    0.51
  14  -8  -1    1.92    0.64
   8  14  -1    1.42    0.49
  14  -8   1    1.56    0.46
 -14   8   1    1.14    0.44
  -8 -14   1    2.49    0.58
   8  14   1    2.01    0.56
  14  -8   1    1.18    0.43
   8  14   1    1.13    0.46
  -9 -14  -1    0.24    0.41
  14  -9  -1    0.82    0.51
   9  14  -1    1.37    0.53
  -9 -14  -1    0.16    0.43
 -14   9  -1   -0.19    0.40
  14  -9  -1    0.69    0.37
  14  -9   1    0.86    0.39
   9  14   1    1.71    0.55
 -14   9   1    0.36    0.37
  14  -9   1    1.13    0.54
  -9 -14   1    0.46    0.45
  10  14  -1    1.77    0.57
 -14  10  -1    2.03    0.59
 -10 -14  -1    2.34    0.66
  14 -10  -1    2.44    0.57
  14 -10  -1    3.26    0.77
 -10 -14  -1    2.78    0.67
 -10 -14   1    3.84    0.72
  14 -10   1    3.26    0.80
 -10 -14   1    3.60    0.76
 -14  10   1    2.49    0.61
  10  14   1    2.74    0.64
  14 -10   1    2.78    0.56
 -11 -14  -1    2.43    0.72
  14 -11  -1    3.50    0.83
 -14  11  -1    2.65    0.65
  11  14  -1    2.99    0.74
  14 -11  -1    2.89    0.50
 -11 -14  -1    3.55    0.75
 -11 -14   1    2.61    0.67
  14 -11   1    3.15    0.65
 -11 -14   1    1.61    0.57
 -14  11   1    2.36    0.69
  11  14   1    3.57    0.77
  14 -11   1    2.57    0.52
  12  14  -1    0.16    0.55
 -12 -14  -1    0.24    0.53
 -12 -14  -1    0.40    0.53
  14 -12  -1    0.36    0.39
 -14  12  -1    1.14    0.62
  14 -12  -1    0.45    0.53
  14 -12   1    1.23    0.62
 -14  12   1    0.47    0.49
 -12 -14   1    0.66    0.52
  14 -12   1    0.78    0.41
  12  14   1    0.59    0.57
  14 -13  -1    5.14    1.05
  13  14  -1    4.49    0.89
 -13 -14  -1    4.22    0.91
 -14  13  -1    3.54    0.84
  14 -13   1    5.17    0.96
 -13 -14   1    5.85    0.95
 -13 -14   1    5.27    0.97
  13  14   1    4.22    0.85
 -14  13   1    4.49    0.85
  12 -15  -1    0.44    0.53
  15  12  -1   -0.05    0.63
 -12  15  -1    1.34    0.62
 -15 -12  -1    0.53    0.61
 -15 -12  -1    1.04    0.60
 -12  15   1    1.05    0.66
  12 -15   1    0.60    0.56
 -15 -12   1    1.65    0.63
  15  12   1    1.78    0.79
  11 -15  -1    1.69    0.69
 -15 -11  -1    1.26    0.53
 -11  15  -1    0.82    0.56
  15  11  -1    2.45    0.83
 -15 -11  -1    0.95    0.55
 -15 -11   1    1.15    0.62
  15  11   1   -0.34    0.56
 -11  15   1    1.55    0.62
 -15 -11   1    1.48    0.56
  11 -15   1    1.66    0.56
  15  10  -1    2.65    0.71
  10 -15  -1    3.33    0.78
 -10  15  -1    2.20    0.60
 -15 -10  -1    3.28    0.67
 -15 -10  -1    2.48    0.65
 -10  15   1    2.44    0.74
  15  10   1    1.37    0.69
 -15 -10   1    1.86    0.60
  10 -15   1    2.97    0.71
 -15 -10   1    1.53    0.59
 -15  -9  -1    5.28    0.78
   9 -15  -1    5.17    0.92
  -9  15  -1    4.35    0.81
 -15  -9  -1    4.43    0.80
  15   9  -1    3.99    0.83
   9 -15   1    5.17    0.91
 -15  -9   1    4.66    0.73
  15   9   1    6.07    0.95
 -15  -9   1    8.07    0.91
  -9  15   1    4.37    0.84
 -15  -8  -1    3.09    0.72
   8 -15  -1    2.25    0.62
 -15  -8  -1    2.28    0.56
  15   8  -1    2.22    0.75
  -8  15  -1    2.06    0.57
  15   8   1    1.77    0.70
   8 -15   1    2.13    0.64
 -15  -8   1    2.23    0.56
  -8  15   1    1.92    0.62
 -15  -8   1    1.32    0.56
  -7  15  -1    0.53    0.47
   7 -15  -1    0.47    0.44
  15   7  -1    0.23    0.59
 -15  -7  -1    1.41    0.50
 -15  -7  -1    1.35    0.49
 -15  -7   1    0.80    0.46
  -7  15   1    0.94    0.60
  15   7   1    0.35    0.56
   7 -15   1    0.75    0.45
 -15  -7   1    1.20    0.40
   6 -15  -1    2.04    0.65
  -6  15  -1    1.64    0.57
  15   6  -1    1.72    0.61
 -15  -6  -1    1.80    0.50
 -15  -6  -1    1.78    0.49
  15   6   1    2.31    0.70
 -15  -6   1    1.65    0.55
 -15  -6   1    1.12    0.47
  -6  15   1    1.72    0.59
   6 -15   1    1.14    0.53
 -15  -5  -1    3.46    0.65
  -5  15  -1    2.79    0.65
 -15  -5  -1    2.87    0.57
   5 -15  -1    3.06    0.67
  15   5  -1    2.57    0.70
 -15  -5   1    3.61    0.71
  -5  15   1    2.67    0.58
   5 -15   1    3.62    0.73
  15   5   1    3.83    0.84
 -15  -5   1    3.08    0.56
  15   4  -1    1.43    0.51
  -4  15  -1    1.61    0.46
   4 -15  -1    1.58    0.51
 -15  -4  -1    2.90    0.58
 -15  -4  -1    2.15    0.49
  15   4   1    2.40    0.63
 -15  -4   1    1.91    0.47
   4 -15   1    2.76    0.62
  -4  15   1    2.05    0.57
 -15  -4   1    1.57    0.50
 -15  -3  -1    1.04    0.43
   3 -15  -1    1.58    0.50
  15   3  -1    1.67    0.56
 -15  -3  -1    1.98    0.44
  -3  15  -1    1.19    0.46
  -3  15   1    2.13    0.61
   3 -15   1    2.23    0.64
  15   3   1    1.26    0.53
 -15  -3   1    1.29    0.49
 -15  -3   1    1.43    0.40
  15   2  -1    4.29    0.79
  -2  15  -1    5.82    0.90
   2 -15  -1    5.60    0.86
 -15  -2  -1    4.55    0.72
 -15  -2  -1    5.31    0.70
  -2  15   1    4.48    0.77
   2 -15   1    6.44    0.80
 -15  -2   1    4.64    0.76
 -15  -2   1    5.96    0.63
  15   2   1    6.29    0.96
  15   1  -1    5.25    0.88
  -1  15  -1    4.82    0.76
   1 -15  -1    6.80    0.83
 -15  -1  -1    5.86    0.66
 -15  -1  -1    6.45    0.76
 -15  -1   1    5.30    0.70
   1 -15   1    5.85    0.91
  15   1   1    7.08    1.07
 -15  -1   1    7.39    0.81
  -1  15   1    5.62    0.87
  15   0  -1    2.37    0.65
   0 -15  -1    3.02    0.69
 -15   0  -1    2.27    0.55
 -15   0  -1    1.84    0.43
   0  15  -1    3.26    0.66
   0  15   1    2.72    0.62
 -15   0   1    3.04    0.66
  15   0   1    2.69    0.64
   0 -15   1    1.81    0.58
 -15   0   1    2.42    0.49
  -1 -15  -1    6.49    0.76
   1  15  -1    4.65    0.79
 -15   1  -1    6.39    0.76
  15  -1  -1    5.09    0.87
 -15   1  -1    5.53    0.64
 -15   1   1    7.24    0.82
  15  -1   1    4.34    0.80
   1  15   1    5.91    0.90
  -1 -15   1    6.87    0.80
   2  15  -1    4.98    0.40
  15  -2  -1    6.88    0.77
 -15   2  -1    5.34    0.80
 -15   2  -1    4.64    0.65
   2  15  -1    4.44    0.76
  -2 -15  -1    4.42    0.37
  -2 -15  -1    5.92    0.86
   2  15   1    4.60    0.39
  -2 -15   1    4.77    0.77
   2  15   1    4.09    0.74
  15  -2   1    4.78    0.75
 -15   2   1    5.29    0.82
 -15   2   1    4.27    0.64
 -15   3  -1    1.84    0.48
  -3 -15  -1    1.32    0.47
   3  15  -1    1.39    0.32
  15  -3  -1    1.45    0.47
  -3 -15  -1    0.89    0.39
   3  15  -1    1.58    0.48
   3  15   1    1.51    0.32
  15  -3   1    1.25    0.47
 -15   3   1    1.69    0.46
   3  15   1    1.62    0.55
  -3 -15   1    2.37    0.55
  -3 -15   1    1.45    0.52
 -15   3   1    1.93    0.55
   4  15  -1    2.64    0.43
  -4 -15  -1    2.52    0.57
  15  -4  -1    1.71    0.55
  -4 -15  -1    1.89    0.41
 -15   4  -1    2.99    0.62
   4  15  -1    2.57    0.65
  -4 -15   1    1.75    0.39
  -4 -15   1    2.45    0.58
  15  -4   1    2.54    0.57
   4  15   1    2.13    0.40
   4  15   1    2.17    0.57
 -15   4   1    1.80    0.50
  15  -4   1    2.68    0.64
   5  15  -1    3.73    0.69
   5  15  -1    2.96    0.51
  15  -5  -1    3.99    0.72
  -5 -15  -1    3.39    0.69
 -15   5  -1    3.32    0.67
  15  -5  -1    3.35    0.69
  15  -5   1    3.81    0.70
 -15   5   1    3.18    0.60
   5  15   1    3.51    0.55
   5  15   1    3.63    0.73
  -5 -15   1    4.18    0.79
  15  -5   1    4.60    0.75
  15  -6  -1    1.80    0.58
 -15   6  -1    1.29    0.47
  -6 -15  -1    1.85    0.59
  15  -6  -1    1.80    0.54
   6  15  -1    3.06    0.64
   6  15  -1    2.72    0.54
   6  15   1    1.18    0.43
  -6 -15   1    1.24    0.46
  15  -6   1    1.48    0.50
   6  15   1    1.28    0.53
  15  -6   1    1.26    0.52
 -15   6   1    0.95    0.44
   7  15  -1    0.49    0.49
 -15   7  -1    1.10    0.48
   7  15  -1    1.00    0.45
  15  -7  -1    0.84    0.51
  -7 -15  -1    0.88    0.45
  15  -7  -1    1.20    0.46
  15  -7   1    0.99    0.45
   7  15   1    1.64    0.52
  -7 -15   1    1.61    0.49
  15  -7   1    1.72    0.56
 -15   7   1    0.91    0.44
   7  15   1    0.31    0.52
  -8 -15  -1    1.91    0.61
   8  15  -1    2.48    0.66
   8  15  -1    2.40    0.58
 -15   8  -1    1.80    0.55
  15  -8  -1    2.89    0.73
  15  -8  -1    2.64    0.65
 -15   8   1    1.71    0.55
  15  -8   1    2.01    0.58
  -8 -15   1    2.00    0.61
   8  15   1    2.35    0.66
  15  -8   1    1.30    0.55
   8  15   1    2.21    0.55
  -9 -15  -1    6.53    0.94
   9  15  -1    5.33    0.89
   9  15  -1    5.85    0.87
  15  -9  -1    5.95    1.01
  15  -9  -1    7.74    0.84
 -15   9  -1    5.67    0.85
  15  -9   1    5.53    0.92
 -15   9   1    5.00    0.83
   9  15   1    3.77    0.78
  15  -9   1    5.77    0.79
  -9 -15   1    4.90    0.87
 -15  10  -1    1.91    0.62
 -10 -15  -1    1.58    0.56
  10  15  -1    2.75    0.72
  15 -10  -1    3.42    0.84
  15 -10  -1    2.19    0.55
 -10 -15  -1    2.70    0.64
  10  15   1    2.54    0.73
  15 -10   1    2.00    0.52
 -10 -15   1    3.56    0.94
 -10 -15   1    2.54    0.65
  15 -10   1    3.22    0.79
  15 -11  -1    1.68    0.69
 -15  11  -1    1.62    0.56
  15 -11  -1    0.86    0.47
  11  15  -1    2.12    0.64
  15 -11   1    1.51    0.62
  11  15   1    2.19    0.69
 -11 -15   1    2.29    0.70
  15 -11   1    1.15    0.52
 -11 -15   1    2.05    0.69
 -15  11   1    1.24    0.63
 -12 -15  -1    0.79    0.65
  15 -12  -1    1.98    0.67
  12  15  -1    1.88    0.74
 -12 -15  -1    2.11    0.74
 -15  12  -1    1.52    0.63
 -12 -15   1    0.95    0.58
 -15  12   1    0.98    0.63
 -12 -15   1    0.56    0.61
  15 -12   1    1.23    0.66
  12  15   1    1.84    0.74
 -10  16  -1    0.92    0.55
 -16 -10  -1    0.77    0.56
  10 -16  -1    0.80    0.58
 -16 -10  -1    0.73    0.54
  16  10  -1    1.55    0.76
  10 -16   1    0.81    0.57
 -10  16   1    0.32    0.48
 -16 -10   1    1.28    0.54
 -16 -10   1    1.01    0.61
  16  10   1    0.80    0.64
 -16  -9  -1    2.63    0.65
   9 -16  -1    3.32    0.84
  -9  16  -1    2.04    0.61
 -16  -9  -1    2.66    0.73
  16   9  -1    2.44    0.72
  16   9   1    2.75    0.73
 -16  -9   1    2.86    0.62
   9 -16   1    3.33    0.80
 -16  -9   1    3.31    0.79
  -9  16   1    3.15    0.74
  16   8  -1    0.95    0.60
   8 -16  -1   -0.21    0.49
  -8  16  -1    0.72    0.48
 -16  -8  -1    0.48    0.47
 -16  -8  -1    0.71    0.46
 -16  -8   1    0.88    0.46
 -16  -8   1    0.92    0.50
  16   8   1    0.73    0.60
   8 -16   1    0.46    0.52
  -8  16   1    0.59    0.47
  16   7  -1    2.37    0.68
  -7  16  -1    3.14    0.77
 -16  -7  -1    2.07    0.53
   7 -16  -1    3.78    0.82
 -16  -7  -1    2.17    0.59
 -16  -7   1    2.53    0.68
 -16  -7   1    3.43    0.62
   7 -16   1    3.03    0.67
  16   7   1    3.29    0.83
  -7  16   1    3.28    0.74
  16   6  -1    3.61    0.80
   6 -16  -1    4.21    0.84
  -6  16  -1    4.32    0.87
 -16  -6  -1    2.80    0.60
 -16  -6  -1    3.33    0.68
   6 -16   1    4.08    0.88
 -16  -6   1    2.63    0.65
 -16  -6   1    3.23    0.59
  16   6   1    3.39    0.77
  -6  16   1    4.17    0.79
  16   5  -1    1.63    0.68
 -16  -5  -1    2.62    0.61
 -16  -5  -1    2.37    0.55
  -5  16  -1    1.56    0.61
   5 -16  -1    2.80    0.73
  -5  16   1    2.21    0.57
   5 -16   1    3.36    0.74
 -16  -5   1    2.80    0.54
 -16  -5   1    3.08    0.71
  16   5   1    2.95    0.76
 -16  -4  -1   12.33    1.01
  16   4  -1   14.48    1.33
   4 -16  -1   14.41    1.27
  -4  16  -1   13.62    1.25
 -16  -4  -1   14.28    1.13
   4 -16   1   13.41    1.20
 -16  -4   1   12.88    1.15
  16   4   1   13.78    1.31
 -16  -4   1   11.14    0.93
  -4  16   1   11.09    1.13
 -16  -3  -1    2.50    0.55
 -16  -3  -1    2.73    0.64
 -16  -3   1    2.81    0.62
 -16  -3   1    3.34    0.56
 -16  -2  -1    5.31    0.79
  16   2  -1    3.12    0.71
  -2  16  -1    3.76    0.79
   2 -16  -1    4.78    0.84
 -16  -2  -1    4.68    0.70
 -16  -2   1    3.00    0.57
  -2  16   1    4.07    0.77
  16   2   1    3.81    0.77
   2 -16   1    4.71    0.87
 -16  -2   1    4.53    0.82
 -16  -1  -1    0.37    0.38
  -1  16  -1    0.48    0.45
  16   1  -1    1.23    0.53
 -16  -1  -1    0.63    0.44
   1 -16  -1    0.52    0.39
 -16  -1   1    0.60    0.37
  16   1   1    1.26    0.54
 -16  -1   1    0.72    0.47
   1 -16   1    1.03    0.53
  -1  16   1    1.33    0.53
 -16   0  -1    0.54    0.41
   0 -16  -1    0.08    0.38
   0  16  -1    0.63    0.46
 -16   0  -1   -0.18    0.35
  16   0  -1   -0.31    0.38
   0 -16   1    0.29    0.37
   0  16   1    0.41    0.41
 -16   0   1    0.37    0.34
  16   0   1   -0.16    0.44
 -16   0   1    0.18    0.44
  -1 -16  -1    0.89    0.48
 -16   1  -1    1.31    0.48
 -16   1  -1    0.97    0.41
   1  16  -1    0.38    0.41
  16  -1  -1    0.63    0.43
  -1 -16   1    1.32    0.50
 -16   1   1    0.45    0.39
 -16   1   1    0.46    0.38
  16  -1   1    0.34    0.43
   1  16   1    0.80    0.48
 -16   2  -1    4.77    0.79
   2  16  -1    4.71    0.83
  16  -2  -1    5.24    0.90
  -2 -16  -1    4.29    0.79
 -16   2  -1    3.84    0.66
  16  -2   1    5.01    0.89
 -16   2   1    4.93    0.71
 -16   2   1    4.22    0.81
   2  16   1    4.92    0.85
  -2 -16   1    4.58    0.77
   3  16  -1    3.62    0.46
   3  16  -1    3.45    0.63
  -3 -16  -1    3.82    0.79
  16  -3  -1    2.55    0.65
  -3 -16  -1    2.43    0.43
 -16   3  -1    2.62    0.55
   3  16   1    3.36    0.44
   3  16   1    2.02    0.65
 -16   3   1    3.35    0.61
  -3 -16   1    2.33    0.42
  16  -3   1    3.05    0.69
 -16   3   1    2.98    0.72
  -3 -16   1    2.82    0.63
   4  16  -1   12.22    1.12
  -4 -16  -1   14.38    1.21
   4  16  -1   12.14    0.84
  16  -4  -1   12.17    1.16
 -16   4  -1   10.36    0.99
   4  16   1   13.63    0.85
  16  -4   1   15.83    1.25
  -4 -16   1   11.90    1.17
   4  16   1   13.57    1.18
  16  -4   1   12.72    1.18
 -16   4   1   11.69    1.00
  16  -5  -1    2.16    0.69
   5  16  -1    2.30    0.47
  16  -5  -1    3.15    0.76
 -16   5  -1    1.47    0.48
  -5 -16  -1    2.63    0.62
   5  16  -1    2.65    0.68
  16  -5   1    2.45    0.69
 -16   5   1    2.04    0.51
  16  -5   1    2.32    0.64
   5  16   1    1.03    0.49
   5  16   1    1.75    0.45
  -5 -16   1    2.32    0.64
  -6 -16  -1    2.83    0.68
   6  16  -1    4.53    0.86
  16  -6  -1    3.72    0.71
  16  -6  -1    4.96    0.93
 -16   6  -1    2.72    0.61
   6  16  -1    4.57    0.68
  16  -6   1    3.58    0.70
   6  16   1    3.16    0.78
   6  16   1    3.55    0.63
  16  -6   1    4.69    0.80
 -16   6   1    3.59    0.69
  16  -7  -1    5.65    0.96
  16  -7  -1    3.18    0.66
   7  16  -1    3.31    0.66
  -7 -16  -1    3.18    0.71
 -16   7  -1    4.25    0.76
   7  16  -1    2.68    0.69
 -16   7   1    3.56    0.72
  16  -7   1    3.37    0.79
  16  -7   1    3.04    0.64
   7  16   1    1.85    0.54
  -7 -16   1    3.62    0.74
   8  16  -1    0.48    0.49
  16  -8  -1    0.80    0.51
 -16   8  -1    0.22    0.51
   8  16  -1    1.03    0.53
   8  16   1    0.49    0.52
   8  16   1    0.87    0.48
  -8 -16   1    0.83    0.51
  16  -8   1    0.35    0.50
 -16   8   1    0.28    0.43
  16  -8   1    1.17    0.50
 -16   9  -1    2.75    0.68
  16  -9  -1    3.05    0.77
  16  -9  -1    2.09    0.61
  -9 -16  -1    2.79    0.67
   9  16  -1    4.00    0.71
  16  -9   1    2.90    0.67
  -9 -16   1    2.54    0.69
   9  16   1    3.05    0.67
  16  -9   1    2.81    0.74
 -10 -16  -1    1.46    0.60
  16 -10  -1    0.64    0.47
  16 -10  -1    0.30    0.55
 -10 -16  -1    0.08    0.54
  10  16  -1    0.42    0.60
 -16  10  -1    0.53    0.54
  16 -10   1    0.58    0.57
  16 -10   1    1.06    0.50
 -10 -16   1    0.47    0.58
  10  16   1    0.43    0.60
 -10 -16   1    1.16    0.71
 -16  10   1    0.52    0.53
   9 -17  -1    4.31    0.91
 -17  -9  -1    3.16    0.78
 -17  -9  -1    2.56    0.79
  17   9  -1    2.46    0.81
  -9  17  -1    1.91    0.71
 -17  -9   1    2.95    0.69
  17   9   1    2.32    0.76
 -17  -9   1    2.98    0.79
   9 -17   1    3.45    0.91
  -9  17   1    3.30    0.83
   8 -17  -1    0.35    0.58
  17   8  -1    0.12    0.64
 -17  -8  -1    0.21    0.48
  -8  17  -1    0.22    0.52
 -17  -8  -1    0.83    0.51
 -17  -8   1    0.25    0.45
 -17  -8   1    0.11    0.53
  -8  17   1   -0.65    0.55
  17   8   1    0.56    0.66
   8 -17   1   -0.26    0.47
 -17  -7  -1    2.57    0.64
   7 -17  -1    3.16    0.71
 -17  -7  -1    3.89    0.75
  -7  17  -1    2.56    0.68
  17   7  -1    3.40    0.85
 -17  -7   1    3.51    0.64
   7 -17   1    3.15    0.72
 -17  -7   1    2.28    0.76
  -7  17   1    2.95    0.71
  17   7   1    4.11    0.93
 -17  -6  -1    1.15    0.56
 -17  -6  -1    1.58    0.56
  17   6  -1    0.41    0.62
   6 -17  -1    1.51    0.58
  -6  17  -1    1.30    0.54
 -17  -6   1    2.11    0.55
  17   6   1    1.90    0.74
   6 -17   1    2.12    0.59
  -6  17   1    1.06    0.47
 -17  -6   1    1.67    0.60
 -17  -5  -1    0.42    0.41
  17   5  -1    0.92    0.55
 -17  -5  -1    0.07    0.41
  -5  17  -1    0.49    0.45
   5 -17  -1    0.79    0.50
 -17  -5   1    0.37    0.44
  -5  17   1    0.88    0.50
  17   5   1   -0.28    0.48
   5 -17   1    0.48    0.49
 -17  -5   1    0.06    0.42
   4 -17  -1    2.60    0.76
 -17  -4  -1    3.72    0.71
 -17  -4  -1    3.03    0.63
  17   4  -1    2.80    0.73
  -4  17  -1    3.92    0.83
 -17  -4   1    3.59    0.75
  17   4   1    3.02    0.71
 -17  -4   1    3.48    0.58
  -4  17   1    3.31    0.82
   4 -17   1    3.97    0.80
  17   3  -1    1.82    0.67
  -3  17  -1    2.98    0.67
   3 -17  -1    3.20    0.69
 -17  -3  -1    2.79    0.60
 -17  -3  -1    3.40    0.68
 -17  -3   1    2.34    0.54
 -17  -3   1    3.46    0.75
  17   3   1    3.58    0.76
  -3  17   1    2.32    0.67
   3 -17   1    3.49    0.72
   2 -17  -1    4.23    0.86
 -17  -2  -1    4.07    0.72
 -17  -2  -1    3.27    0.65
  17   2  -1    3.07    0.77
  -2  17  -1    3.21    0.67
 -17  -2   1    2.67    0.68
   2 -17   1    2.26    0.63
  -2  17   1    3.22    0.70
 -17  -2   1    2.91    0.58
  17   2   1    3.94    0.83
   1 -17  -1    0.34    0.47
 -17  -1  -1    0.48    0.44
  17   1  -1    0.72    0.52
 -17  -1  -1    0.55    0.52
  -1  17  -1    0.80    0.52
   1 -17   1    0.68    0.42
  -1  17   1    1.21    0.59
  17   1   1    1.27    0.55
 -17  -1   1    0.89    0.51
 -17  -1   1    1.24    0.47
 -17   0  -1    0.62    0.50
   0  17  -1    0.84    0.42
  17   0  -1    0.00    0.43
 -17   0  -1    0.71    0.43
   0 -17  -1    0.10    0.39
 -17   0   1    0.38    0.41
 -17   0   1    0.26    0.44
   0  17   1    0.07    0.48
   0 -17   1   -0.09    0.37
  17   0   1    0.79    0.52
   1  17  -1    0.50    0.52
  -1 -17  -1    1.22    0.49
 -17   1  -1    0.74    0.50
  17  -1  -1    0.23    0.63
 -17   1  -1    0.54    0.45
 -17   1   1    0.56    0.46
  17  -1   1    0.26    0.55
  -1 -17   1    0.66    0.53
 -17   1   1    0.63    0.48
   1  17   1    0.94    0.45
   2  17  -1    2.59    0.64
 -17   2  -1    3.92    0.71
  17  -2  -1    3.81    1.09
 -17   2  -1    2.67    0.59
  -2 -17  -1    2.52    0.69
  -2 -17   1    4.19    0.74
 -17   2   1    3.13    0.64
 -17   2   1    3.58    0.78
   2  17   1    2.26    0.66
 -17   3  -1    2.51    0.54
  17  -3  -1    3.07    0.78
   3  17  -1    2.75    0.36
  -3 -17  -1    3.85    0.78
   3  17  -1    2.28    0.73
   3  17   1    3.31    0.38
  -3 -17   1    4.10    0.78
  17  -3   1    4.16    0.87
 -17   3   1    3.00    0.64
  17  -3   1    3.24    0.70
   3  17   1    2.90    0.75
 -17   3   1    3.24    0.72
 -17   4  -1    3.74    0.71
  17  -4  -1    3.37    0.73
   4  17  -1    3.16    0.74
  -4 -17  -1    3.48    0.79
  17  -4  -1    4.27    0.83
   4  17  -1    3.79    0.51
   4  17   1    3.35    0.46
  -4 -17   1    3.91    0.78
   4  17   1    2.88    0.81
 -17   4   1    2.82    0.60
  17  -4   1    1.78    0.59
  17  -4   1    3.11    0.77
  -5 -17  -1    0.52    0.46
  17  -5  -1    0.26    0.51
  17  -5  -1    0.58    0.54
   5  17  -1    0.20    0.52
 -17   5  -1    0.28    0.43
   5  17  -1    0.21    0.38
   5  17   1    0.13    0.46
 -17   5   1    0.50    0.42
   5  17   1    0.63    0.37
  17  -5   1   -0.01    0.53
  17  -5   1    0.07    0.47
  -5 -17   1    0.85    0.56
  17  -6  -1    1.95    0.73
   6  17  -1    2.05    0.69
  17  -6  -1    2.39    0.67
  -6 -17  -1    1.21    0.60
   6  17  -1    1.44    0.48
 -17   6  -1    1.70    0.62
  -6 -17   1    2.16    0.66
  17  -6   1    1.48    0.63
 -17   6   1    1.57    0.55
  17  -6   1    2.86    0.74
   6  17   1    1.29    0.48
   6  17   1    1.45    0.59
  17  -7  -1    3.81    0.90
 -17   7  -1    3.11    0.66
  17  -7  -1    2.90    0.75
   7  17  -1    2.46    0.70
   7  17  -1    2.58    0.59
  -7 -17  -1    2.46    0.70
  17  -7   1    2.57    0.73
 -17   7   1    3.71    0.75
   7  17   1    2.65    0.63
  17  -7   1    4.08    0.87
  -7 -17   1    3.63    0.75
   7  17   1    1.97    0.68
 -17   8  -1    0.15    0.42
   8  17  -1   -0.09    0.51
  17  -8  -1    0.23    0.51
  -8 -17  -1    0.42    0.55
   8  17  -1    0.55    0.57
  17  -8  -1    0.75    0.57
  -8 -17   1    0.41    0.56
   8  17   1    0.58    0.57
  17  -8   1   -0.25    0.50
   8  17   1    0.11    0.55
  17  -8   1    0.85    0.56
   9  17  -1    3.57    0.86
 -17   9  -1    2.01    0.70
  17  -9  -1    3.71    0.86
   9  17  -1    3.07    0.76
  17  -9  -1    2.86    0.71
  -9 -17  -1    3.29    0.80
  -9 -17   1    2.75    0.78
  17  -9   1    2.89    0.82
   9  17   1    2.30    0.67
  17  -9   1    2.26    0.67
 -17   9   1    2.45    0.70
  18   6  -1   -0.56    0.63
  -6  18  -1    0.41    0.52
   6 -18  -1    0.35    0.54
 -18  -6  -1    0.38    0.55
 -18  -6  -1    0.88    0.55
  18   6   1   -0.18    0.59
   6 -18   1    0.68    0.52
  -6  18   1    0.67    0.53
 -18  -6   1    1.17    0.50
 -18  -6   1    0.91    0.57
  18   5  -1    0.72    0.67
 -18  -5  -1    0.73    0.55
 -18  -5  -1    1.07    0.57
  -5  18  -1    1.25    0.54
   5 -18  -1    2.04    0.64
 -18  -5   1    1.39    0.52
  -5  18   1    1.12    0.55
 -18  -5   1    1.21    0.67
   5 -18   1    0.72    0.51
  18   5   1    1.78    0.68
 -18  -4  -1    0.02    0.45
  18   4  -1    0.81    0.60
 -18  -4  -1    0.53    0.48
  -4  18  -1    0.92    0.53
   4 -18  -1    0.62    0.55
  18   4   1    0.78    0.62
 -18  -4   1    0.58    0.57
   4 -18   1    0.25    0.43
 -18  -4   1    0.48    0.43
  -4  18   1    0.17    0.43
 -18  -3  -1    4.54    0.82
  -3  18  -1    4.30    0.93
 -18  -3  -1    5.07    0.80
  18   3  -1    5.02    1.04
   3 -18  -1    6.34    1.04
 -18  -3   1    6.00    0.95
  18   3   1    4.15    0.93
 -18  -3   1    4.33    0.68
   3 -18   1    5.57    0.99
  -3  18   1    6.04    1.01
 -18  -2  -1    9.09    0.96
   2 -18  -1    5.88    0.93
  18   2  -1    8.20    1.28
  -2  18  -1    7.46    1.07
 -18  -2  -1    4.92    0.75
  18   2   1    4.99    1.07
  -2  18   1    6.40    0.97
 -18  -2   1    6.71    0.79
   2 -18   1    8.73    1.02
 -18  -2   1    8.30    1.00
 -18  -1  -1    3.09    0.70
  18   1  -1    2.22    0.66
   1 -18  -1    2.71    0.69
  -1  18  -1    1.25    0.57
 -18  -1  -1    1.93    0.58
 -18  -1   1    3.34    0.77
   1 -18   1    2.84    0.70
 -18  -1   1    1.65    0.52
  18   1   1    2.43    0.65
  -1  18   1    1.15    0.64
   0 -18  -1    1.41    0.59
 -18   0  -1   -0.04    0.47
 -18   0  -1    0.90    0.49
   0  18  -1    1.39    0.53
  18   0  -1    0.25    0.63
   0  18   1    1.27    0.57
 -18   0   1    0.98    0.57
   0 -18   1    0.47    0.44
 -18   0   1    0.36    0.40
  18   0   1    1.03    0.65
   1  18  -1    2.57    0.70
  -1 -18  -1    2.65    0.69
 -18   1  -1    2.20    0.59
 -18   1  -1    1.57    0.59
  18  -1  -1    2.71    0.79
 -18   1   1    2.72    0.68
  18  -1   1    1.53    0.67
  -1 -18   1    2.27    0.64
   1  18   1    2.04    0.61
 -18   1   1    2.85    0.65
   2  18  -1    6.77    0.99
 -18   2  -1    6.46    0.95
  -2 -18  -1    8.67    1.04
  18  -2  -1    9.45    1.05
 -18   2   1    7.53    0.93
   2  18   1    7.41    1.11
  -2 -18   1    9.11    1.03
  18  -2   1    6.78    1.08
 -18   2   1    6.94    1.07
  18  -3  -1    4.15    0.88
 -18   3  -1    4.55    0.83
   3  18  -1    6.77    1.05
  -3 -18  -1    4.64    0.83
 -18   3   1    3.89    0.73
   3  18   1    4.29    0.93
  18  -3   1    4.97    0.96
  18  -3   1    3.09    0.78
  -3 -18   1    5.30    0.96
  18  -4  -1    0.05    0.60
 -18   4  -1    0.26    0.44
  18  -4  -1    0.87    0.59
   4  18  -1    0.37    0.49
  -4 -18  -1    0.63    0.55
  18  -4   1    0.13    0.57
 -18   4   1    0.05    0.52
  -4 -18   1   -0.07    0.47
   4  18   1    1.09    0.65
  18  -4   1    0.16    0.60
  18  -5  -1    1.30    0.65
   5  18  -1    1.43    0.48
 -18   5  -1    2.35    0.65
  -5 -18  -1    1.82    0.62
   5  18  -1    1.15    0.63
  -5 -18   1    1.32    0.67
  18  -5   1    1.16    0.70
  18  -5   1    1.70    0.72
   5  18   1    1.57    0.49
   5  18   1    1.90    0.70
 -18   5   1    1.00    0.60
  -6 -18  -1    0.36    0.55
   6  18  -1    0.79    0.51
  18  -6  -1   -0.15    0.54
  18  -6  -1    0.73    0.65
   6  18  -1    0.23    0.49
   6  18   1    0.33    0.48
   6  18   1    0.06    0.47
  18  -6   1    1.02    0.71
  18  -6   1   -0.06    0.56
  -6 -18   1    0.13    0.49
 -18   6   1    0.96    0.65
  -3  19  -1    1.10    0.67
  19   3  -1    1.12    0.72
   3 -19  -1    0.93    0.62
 -19  -3  -1    0.13    0.56
 -19  -3  -1    1.70    0.69
 -19  -3   1    0.89    0.54
   3 -19   1    1.60    0.71
  -3  19   1    0.90    0.62
 -19  -3   1    0.95    0.64
  19   3   1    3.06    0.91
  19   2  -1    2.18    0.74
 -19  -2  -1    1.37    0.58
  -2  19  -1    2.84    0.82
   2 -19  -1    1.58    0.61
 -19  -2  -1    1.54    0.71
 -19  -2   1    1.96    0.59
  19   2   1    1.40    0.73
   2 -19   1    1.40    0.61
  -2  19   1    2.21    0.77
 -19  -2   1    1.78    0.68
  -1  19  -1    0.56    0.57
 -19  -1  -1   -0.08    0.56
  19   1  -1   -0.22    0.51
 -19  -1  -1    0.43    0.56
   1 -19  -1    0.33    0.46
 -19  -1   1    0.21    0.48
  -1  19   1    0.36    0.59
   1 -19   1    0.80    0.50
 -19  -1   1    0.53    0.61
  19   1   1    0.38    0.64
   0 -19  -1    6.37    0.98
  19   0  -1    6.79    1.19
 -19   0  -1    7.62    1.09
   0  19  -1    6.93    1.16
 -19   0  -1    6.35    0.90
 -19   0   1    5.76    0.85
   0 -19   1   10.15    1.19
  19   0   1    6.57    1.20
 -19   0   1    6.98    1.01
   0  19   1    7.08    1.08
  19  -1  -1    0.76    0.66
 -19   1  -1    1.31    0.63
 -19   1  -1   -0.52    0.46
   1  19  -1    0.82    0.54
  -1 -19  -1    0.77    0.51
 -19   1   1   -0.21    0.55
   1  19   1   -0.25    0.49
  -1 -19   1    0.08    0.53
 -19   1   1    0.15    0.47
  19  -1   1    0.81    0.69
 -19   2  -1    2.27    0.62
  19  -2  -1    2.95    0.81
   2  19  -1    1.28    0.63
  -2 -19  -1    1.96    0.73
 -19   2   1    1.92    0.63
  19  -2   1    1.57    0.70
 -19   2   1    1.41    0.77
  19  -2   1    2.00    0.74
   2  19   1    1.87    0.68
  -2 -19   1    2.87    0.73
  19  -3  -1    1.75    0.71
  -3 -19  -1    1.36    0.65
 -19   3  -1    0.88    0.58
   3  19  -1    1.30    0.64
   3  19   1    0.82    0.65
  -3 -19   1    1.08    0.65
 -19   3   1    1.30    0.62
  19  -3   1    0.62    0.70
  19  -3   1    1.62    0.66
   0   0   2    0.04    0.02
   0   0   2   -0.01    0.01
  -1   0  -2  238.66    9.70
   1   0  -2  276.78    9.83
   0   1  -2  283.48    9.65
   1   0   2  282.53    9.82
  -1   0   2  242.96    9.74
   0   1   2  279.67    9.65
  -1   1  -2  104.19    3.52
   1  -1  -2  102.52    3.52
   1  -1  -2  100.25    3.56
  -1   1  -2  102.63    3.53
   1  -1  -2  106.79    3.52
   1   1  -2  103.17    3.54
  -1  -1  -2  100.39    3.53
  -1  -1  -2   99.40    3.54
  -1  -1  -2   98.06    3.48
  -1   1  -2  100.87    3.51
   1   1  -2  109.58    3.49
   1   1  -2   99.52    3.54
   1   1   2   99.10    3.53
  -1   1   2  101.42    3.56
   1  -1   2   98.70    3.50
   1   1   2   98.58    3.47
   1  -1   2  102.17    3.52
  -1  -1   2  100.98    3.54
  -1   1   2  103.80    3.50
  -1   1   2  105.77    3.52
  -1  -1   2   97.99    3.54
   1  -1   2  104.25    3.54
  -1  -1   2  106.74    3.47
   1   1   2  102.66    3.54
   1  -2  -2  133.16    4.78
  -1   2  -2  131.79    4.73
  -1   2  -2  137.59    4.74
  -2  -1  -2  135.59    4.74
  -1   2  -2  134.93    4.67
   1  -2  -2  138.22    4.68
   1  -2  -2  138.36    4.78
   1  -2  -2  136.16    4.67
   2   1  -2  136.44    4.75
  -2  -1  -2  134.33    4.74
   1  -2  -2  138.19    4.73
   2   1  -2  136.17    4.75
  -2  -1  -2  134.21    4.64
  -2  -1   2  138.36    4.76
   2   1   2  142.20    4.74
  -2  -1   2  140.13    4.75
  -2  -1   2  139.47    4.63
   1  -2   2  132.71    4.73
   2   1   2  134.93    4.75
   1  -2   2  134.84    4.73
   1  -2   2  140.83    4.67
  -2  -1   2  135.24    4.63
   2   1   2  133.83    4.64
  -1   2   2  144.69    4.74
   2   0  -2  134.40    4.74
  -2   0  -2  136.11    4.72
   2   0  -2  141.76    4.63
   0   2  -2  137.43    4.67
  -2   0  -2  137.91    4.65
   0  -2  -2  137.94    4.67
   0   2  -2  133.63    4.73
   0  -2  -2  139.13    4.73
   0   2  -2  142.67    4.68
   0   2  -2  140.45    4.71
   0  -2  -2  138.71    4.73
  -2   0  -2  141.01    4.73
   2   0  -2  135.46    4.73
   0  -2   2  129.44    4.70
  -2   0   2  136.06    4.63
   0   2   2  131.43    4.73
   2   0   2  131.36    4.72
   0   2   2  139.68    4.73
   2   0   2  134.48    4.64
   0   2   2  137.40    4.67
  -2   0   2  138.26    4.73
  -2   0   2  135.46    4.75
   0  -2   2  134.08    4.73
   2   0   2  136.57    4.73
  -1  -2  -2  151.07    4.75
   2  -1  -2  140.23    4.78
   2  -1  -2  136.17    4.68
   1   2  -2  138.98    4.69
  -2   1  -2  137.35    4.70
   1   2  -2  139.49    4.72
  -2   1  -2  137.40    4.73
  -1  -2  -2  139.41    4.71
  -1  -2  -2  135.70    4.70
   2  -1  -2  140.73    4.72
   1   2  -2  133.40    4.75
  -2   1  -2  138.14    4.72
   2  -1   2  132.39    4.73
  -2   1   2  137.61    4.79
   1   2   2  144.91    4.76
  -1  -2   2  132.23    4.71
  -2   1   2  134.75    4.68
  -2   1   2  136.39    4.72
   2  -1   2  132.22    4.69
  -1  -2   2  131.41    4.75
   1   2   2  132.11    4.70
  -1  -2   2  128.51    4.68
   2  -1   2  138.07    4.72
   1   2   2  133.29    4.71
  -2  -2  -2   23.38    0.92
  -2  -2  -2   22.46    0.86
   2  -2  -2   23.58    0.88
  -2  -2  -2   22.37    0.92
   2   2  -2   22.44    0.92
  -2   2  -2   21.38    0.92
   2  -2  -2   23.00    0.90
  -2   2  -2   23.73    0.94
   2   2  -2   21.52    0.85
   2   2  -2   23.24    0.94
  -2   2  -2   22.26    0.87
   2  -2  -2   22.46    0.97
  -2  -2  -2   23.50    0.93
  -2   2   2   23.36    0.98
   2   2   2   21.68    0.86
  -2  -2   2   23.97    0.93
  -2  -2   2   22.88    0.85
   2  -2   2   22.56    0.93
   2  -2   2   20.93    0.91
   2   2   2   22.62    0.93
   2  -2   2   23.56    0.88
  -2   2   2   23.18    0.90
  -2  -2   2   20.37    0.93
  -2   2   2   23.03    0.88
   3   2  -2   23.26    0.95
  -3  -2  -2   21.17    0.93
  -2   3  -2   22.91    0.96
   2  -3  -2   23.33    0.94
   2  -3  -2   22.18    0.84
  -3  -2  -2   22.03    0.94
  -3  -2  -2   21.30    0.86
  -2   3  -2   22.66    0.84
   2  -3  -2   21.98    0.99
   3   2  -2   24.27    0.97
   3   2  -2   22.92    0.85
  -2   3  -2   20.21    0.94
   2  -3  -2   21.68    0.99
   2  -3   2   21.06    0.94
  -2   3   2   21.54    0.84
   2  -3   2   20.90    0.83
   3   2   2   20.17    0.85
  -3  -2   2   23.19    0.85
  -2   3   2   21.33    0.93
   2  -3   2   21.25    0.94
  -3  -2   2   22.81    0.95
  -3  -2   2   22.83    0.96
   3   2   2   20.47    0.94
   1  -3  -2  147.42    4.94
   1  -3  -2  147.60    5.04
  -3  -1  -2  140.39    5.04
  -1   3  -2  133.12    5.04
  -1   3  -2  139.08    4.91
   3   1  -2  141.49    5.03
   3   1  -2  137.63    4.91
   1  -3  -2  142.19    5.08
  -3  -1  -2  140.14    4.93
  -1   3  -2  139.32    5.03
  -3  -1  -2  141.13    5.02
   3   1  -2  139.24    5.04
   1  -3   2  142.02    5.03
   1  -3   2  141.84    5.04
   1  -3   2  147.20    4.91
  -1   3   2  152.19    4.92
   3   1   2  150.86    5.06
   3   1   2  148.44    4.93
  -1   3   2  150.44    5.09
  -3  -1   2  147.40    4.91
   3   1   2  147.18    5.02
  -3  -1   2  144.04    5.05
  -1   3   2  150.79    5.04
  -3  -1   2  145.74    5.04
  -3   0  -2  399.32   13.81
   3   0  -2  402.95   13.84
   3   0  -2  404.40   13.71
   0   3  -2  405.83   13.73
  -3   0  -2  404.54   13.75
   0  -3   2  405.62   13.73
   3   0   2  417.32   13.81
   3   0   2  402.39   13.74
   0  -3   2  423.82   13.82
   0   3   2  393.29   13.84
  -3   0   2  411.37   13.83
  -1  -3  -2  153.25    4.98
   3  -1  -2  144.98    5.02
   3  -1  -2  145.08    5.08
   3  -1  -2  148.42    4.95
   1   3  -2  146.95    4.98
  -3   1  -2  148.87    5.02
   1   3  -2  152.69    5.01
  -3   1  -2  147.29    5.03
   1   3  -2  139.97    5.05
  -1  -3  -2  148.85    5.02
  -1  -3  -2  151.84    5.05
  -1  -3   2  136.36    4.97
  -3   1   2  139.55    5.08
   3  -1   2  138.76    5.02
   3  -1   2  142.61    4.99
  -1  -3   2  137.41    5.04
   3  -1   2  138.98    4.99
  -1  -3   2  146.98    5.00
  -3   1   2  139.48    4.95
   3  -1   2  144.15    5.02
   1   3   2  139.04    4.97
   1   3   2  146.63    5.05
  -3   1   2  144.10    5.01
   1   3   2  137.08    5.01
  -3   2  -2   23.00    0.94
  -3   2  -2   21.45    0.93
   3  -2  -2   20.38    0.97
   2   3  -2   20.44    0.94
   3  -2  -2   20.40    0.88
   3  -2  -2   20.23    0.88
  -2  -3  -2   21.30    0.92
   2   3  -2   21.67    0.88
  -2  -3  -2   21.92    0.90
   2   3  -2   21.52    0.91
  -3   2  -2   21.99    0.89
  -2  -3  -2   21.19    0.88
  -2  -3   2   22.16    0.87
  -3   2   2   22.32    0.99
  -2  -3   2   22.71    0.91
   3  -2   2   23.35    0.90
  -3   2   2   22.05    0.89
   3  -2   2   23.35    0.94
   2   3   2   20.93    0.89
  -2  -3   2   21.65    0.95
  -3   2   2   22.81    0.89
   3  -2   2   21.77    0.92
   2   3   2   21.15    0.90
   2   3   2   22.37    0.94
   3   3  -2  194.91    6.31
   3  -3  -2  185.69    6.28
  -3  -3  -2  171.10    6.36
  -3  -3  -2  180.02    6.32
  -3   3  -2  190.82    6.29
  -3   3  -2  185.15    6.40
   3  -3  -2  176.62    6.35
  -3   3  -2  180.16    6.41
   3  -3  -2  185.65    6.47
   3   3  -2  181.47    6.38
  -3  -3  -2  185.79    6.37
   3   3  -2  178.83    6.39
   3   3   2  180.40    6.38
  -3  -3   2  182.81    6.41
  -3   3   2  184.91    6.47
   3  -3   2  174.58    6.38
  -3  -3   2  188.16    6.29
   3  -3   2  176.60    6.39
  -3   3   2  183.99    6.36
  -3   3   2  184.68    6.29
   3  -3   2  187.57    6.29
   3   3   2  180.76    6.31
  -3  -3   2  182.52    6.37
  -4  -3  -2   57.80    2.27
  -4  -3  -2   56.97    2.19
  -3   4  -2   54.89    2.30
   4   3  -2   64.59    2.44
  -4  -3  -2   60.19    2.27
   3  -4  -2   58.42    2.27
   3  -4  -2   59.28    2.13
   3  -4  -2   59.56    2.37
   3  -4  -2   56.19    2.35
  -4  -3  -2   60.19    2.26
   4   3  -2   58.60    2.28
  -3   4  -2   59.80    2.30
  -3   4  -2   58.83    2.13
  -4  -3   2   57.04    2.39
  -4  -3   2   61.56    2.17
   4   3   2   59.30    2.19
   4   3   2   65.72    2.45
   3  -4   2   60.48    2.30
  -4  -3   2   59.68    2.28
  -3   4   2   61.30    2.14
   3  -4   2   60.15    2.13
  -2   4  -2  303.25   10.44
  -2   4  -2  287.26   10.13
   4   2  -2  291.74   10.33
   2  -4  -2  294.49   10.13
   2  -4  -2  290.67   10.51
  -2   4  -2  286.30   10.34
   2  -4  -2  291.33   10.13
  -4  -2  -2  292.13   10.31
  -4  -2  -2  290.39   10.21
  -4  -2  -2  275.71   10.27
   4   2  -2  286.03   10.29
   2  -4  -2  286.42   10.30
   4   2   2  312.43   10.35
  -4  -2   2  308.29   10.18
  -4  -2   2  314.24   10.33
   2  -4   2  300.12   10.34
   2  -4   2  316.21   10.14
   4   2   2  307.21   10.29
  -2   4   2  324.33   10.34
   2  -4   2  302.52   10.33
  -4  -2   2  312.10   10.34
   4   2   2  306.15   10.21
  -4  -2   2  306.03   10.19
  -1   4  -2  118.33    4.58
  -4  -1  -2  120.85    4.46
  -1   4  -2  123.96    4.39
   1  -4  -2  131.61    4.48
  -1   4  -2  121.02    4.55
   4   1  -2  125.78    4.42
   1  -4  -2  121.00    4.59
   1  -4  -2  133.13    4.58
   4   1  -2  124.76    4.55
  -4  -1  -2  122.48    4.53
  -1   4  -2  125.65    4.39
  -4  -1  -2  122.90    4.56
   4   1  -2  126.73    4.58
   1  -4   2  134.95    4.58
  -4  -1   2  133.79    4.43
  -1   4   2  142.42    4.60
   4   1   2  135.27    4.55
  -1   4   2  126.79    4.62
   4   1   2  127.78    4.45
   4   1   2  133.57    4.60
  -4  -1   2  131.09    4.59
   1  -4   2  126.12    4.58
  -4  -1   2  139.01    4.59
  -1   4   2  137.09    4.39
  -4   0  -2   24.02    0.97
   4   0  -2   25.03    1.05
   4   0  -2   24.18    1.04
   4   0  -2   23.94    0.92
   0   4  -2   24.40    1.06
  -4   0  -2   24.24    1.01
  -4   0  -2   24.47    1.03
   0   4  -2   24.48    0.91
   0  -4  -2   24.01    0.90
   0   4  -2   22.66    1.01
   0  -4  -2   23.45    1.03
   0  -4  -2   22.95    1.03
   4   0   2   22.97    1.00
  -4   0   2   23.69    1.06
   0  -4   2   24.31    1.02
   4   0   2   24.75    1.04
   0   4   2   23.12    1.04
  -4   0   2   23.53    1.02
   0   4   2   23.85    0.90
   4   0   2   24.81    0.96
   0  -4   2   24.40    0.91
  -4   0   2   23.21    0.92
   0   4   2   22.31    1.04
   0  -4   2   24.65    1.05
  -4   1  -2  134.09    4.55
  -4   1  -2  136.69    4.53
  -4   1  -2  136.23    4.56
   1   4  -2  136.34    4.55
  -1  -4  -2  130.43    4.55
   4  -1  -2  128.81    4.60
   1   4  -2  135.79    4.47
  -1  -4  -2  130.05    4.56
   4  -1  -2  132.25    4.46
   1   4  -2  128.69    4.59
   4  -1  -2  134.01    4.56
  -1  -4  -2  131.27    4.46
  -1  -4   2  121.28    4.57
  -4   1   2  123.77    4.53
   1   4   2  118.27    4.54
   1   4   2  135.23    4.60
   1   4   2  122.30    4.46
   4  -1   2  122.45    4.51
   4  -1   2  126.22    4.55
  -4   1   2  118.96    4.60
  -1  -4   2  129.68    4.53
  -4   1   2  122.95    4.46
   4  -1   2  123.16    4.53
  -1  -4   2  125.30    4.46
   4  -2  -2  306.59   10.22
  -4   2  -2  309.29   10.25
  -2  -4  -2  311.45   10.23
  -2  -4  -2  304.63   10.29
   2   4  -2  323.78   10.26
   4  -2  -2  305.72   10.37
   2   4  -2  319.84   10.24
  -2  -4  -2  305.72   10.26
  -4   2  -2  301.59   10.28
   2   4  -2  291.08   10.31
   4  -2  -2  310.68   10.25
  -4   2   2  286.94   10.36
   2   4   2  291.19   10.23
  -2  -4   2  289.20   10.21
  -2  -4   2  280.13   10.22
   4  -2   2  292.71   10.28
  -4   2   2  290.10   10.23
   4  -2   2  295.03   10.27
   4  -2   2  282.05   10.26
   2   4   2  283.17   10.25
   4  -2   2  293.63   10.25
  -2  -4   2  288.06   10.31
   2   4   2  316.13   10.32
  -4   2   2  290.90   10.22
   3   4  -2   61.12    2.22
   3   4  -2   59.81    2.29
   3   4  -2   60.53    2.26
  -3  -4  -2   61.77    2.27
   4  -3  -2   56.20    2.33
  -4   3  -2   61.42    2.29
  -3  -4  -2   59.74    2.23
   4  -3  -2   62.15    2.24
  -3  -4  -2   61.17    2.24
   4  -3  -2   61.33    2.20
  -4   3  -2   59.66    2.19
  -3  -4   2   57.21    2.22
  -3  -4   2   55.04    2.37
  -3  -4   2   64.38    2.21
   3   4   2   56.67    2.22
  -4   3   2   59.62    2.24
   4  -3   2   59.14    2.20
   4  -3   2   56.34    2.28
   4  -3   2   58.81    2.29
  -4   3   2   60.51    2.20
  -4   3   2   59.00    2.36
   3   4   2   56.49    2.24
   4  -3   2   55.63    2.25
  -4   4  -2    4.03    0.26
   4   4  -2    2.92    0.30
   4  -4  -2    2.15    0.35
   4  -4  -2    2.67    0.39
  -4   4  -2    3.39    0.32
  -4   4  -2    2.80    0.31
  -4  -4  -2    2.33    0.27
   4   4  -2    3.13    0.27
  -4  -4  -2    3.40    0.31
   4  -4  -2    2.85    0.23
   4  -4  -2    3.42    0.31
  -4  -4  -2    3.48    0.31
  -4  -4  -2    2.74    0.27
   4   4  -2    3.51    0.32
  -4   4   2    3.05    0.29
   4  -4   2    3.62    0.33
  -4  -4   2    3.59    0.32
   4   4   2    2.58    0.25
   4   4   2    2.97    0.30
  -4   4   2    3.18    0.25
   4  -4   2    2.44    0.29
  -4  -4   2    3.15    0.25
  -4  -4   2    3.12    0.31
   4  -4   2    3.23    0.25
   4  -5  -2  338.62   11.96
  -4   5  -2  346.92   11.63
  -5  -4  -2  338.81   11.76
   4  -5  -2  336.46   11.84
   4  -5  -2  344.24   11.97
  -5  -4  -2  361.96   11.82
   4  -5  -2  346.12   11.63
  -4   5  -2  346.83   11.87
  -5  -4  -2  340.39   11.83
  -4   5  -2  324.75   11.91
  -5  -4  -2  342.44   11.82
   5   4  -2  351.44   11.87
   5   4  -2  352.48   11.97
   5   4   2  337.27   11.86
  -4   5   2  341.42   11.83
  -4   5   2  341.62   11.63
  -5  -4   2  331.88   11.82
   4  -5   2  344.91   11.64
   4  -5   2  336.30   11.85
  -5  -4   2  345.38   11.70
   4  -5   2  336.35   11.88
   5   4   2  334.04   11.73
  -5  -4   2  338.50   11.86
   3  -5  -2    2.83    0.18
   3  -5  -2    1.99    0.33
  -5  -3  -2    2.66    0.27
   5   3  -2    3.36    0.33
  -3   5  -2    2.07    0.33
   3  -5  -2    3.36    0.32
  -5  -3  -2    2.32    0.23
   5   3  -2    2.31    0.27
  -3   5  -2    3.35    0.32
   3  -5  -2    2.04    0.34
  -5  -3  -2    2.44    0.38
  -3   5  -2    2.57    0.18
  -5  -3  -2    2.33    0.25
  -5  -3   2    2.12    0.21
  -5  -3   2    2.45    0.22
   3  -5   2    2.26    0.28
   3  -5   2    2.04    0.17
   5   3   2    2.04    0.31
  -3   5   2    2.61    0.29
  -5  -3   2    2.39    0.29
   3  -5   2    3.00    0.39
   5   3   2    2.44    0.23
  -3   5   2    2.55    0.18
  -5  -3   2    2.95    0.34
   2  -5  -2   61.11    2.16
  -2   5  -2   60.89    2.16
  -2   5  -2   61.36    2.40
  -2   5  -2   58.97    2.43
   5   2  -2   59.39    2.36
   2  -5  -2   60.06    2.45
  -5  -2  -2   62.08    2.42
   2  -5  -2   64.05    2.41
   5   2  -2   60.77    2.42
  -5  -2  -2   61.36    2.40
  -5  -2  -2   62.30    2.29
  -2   5   2   60.29    2.46
  -5  -2   2   64.63    2.41
   5   2   2   62.79    2.35
  -5  -2   2   62.27    2.26
   2  -5   2   63.57    2.16
   2  -5   2   60.74    2.42
   2  -5   2   65.59    2.43
   5   2   2   63.87    2.44
  -2   5   2   62.68    2.41
  -5  -2   2   63.85    2.53
   5   2   2   63.73    2.28
  -5  -1  -2   12.38    0.64
   5   1  -2   11.99    0.55
  -1   5  -2   12.47    0.49
  -1   5  -2   13.27    0.72
  -1   5  -2   12.22    0.67
   1  -5  -2   13.25    0.69
  -1   5  -2   12.63    0.52
   1  -5  -2   12.77    0.71
   5   1  -2   12.39    0.66
   5   1  -2   13.85    0.71
  -5  -1  -2   11.85    0.66
  -5  -1  -2   12.20    0.60
  -1   5   2   12.29    0.71
  -5  -1   2   12.10    0.69
   1  -5   2   11.81    0.68
  -5  -1   2   11.99    0.55
  -1   5   2   12.41    0.68
   1  -5   2   12.44    0.67
   5   1   2   11.53    0.67
  -1   5   2   13.24    0.49
  -5  -1   2   13.64    0.69
   5   1   2   12.40    0.58
   5   1   2   11.75    0.63
   0  -5  -2  206.21    7.26
   5   0  -2  203.26    7.11
   0   5  -2  203.51    7.30
   5   0  -2  202.88    7.26
   0  -5  -2  201.33    7.38
   0   5  -2  213.34    7.07
   0  -5  -2  207.80    7.06
   0   5  -2  220.28    7.40
   5   0  -2  204.88    7.26
  -5   0  -2  201.74    7.21
  -5   0  -2  209.76    7.19
  -5   0  -2  208.51    7.26
  -5   0   2  204.07    7.11
  -5   0   2  207.08    7.26
   5   0   2  207.11    7.16
   0  -5   2  205.12    7.28
   0   5   2  209.35    7.07
   0  -5   2  210.00    7.25
   0   5   2  210.50    7.29
   0  -5   2  207.17    7.07
   5   0   2  210.40    7.28
  -5   0   2  213.37    7.32
   0   5   2  200.76    7.29
   5   0   2  206.22    7.21
  -1  -5  -2   11.42    0.72
   1   5  -2   13.30    0.58
  -5   1  -2   12.64    0.66
  -5   1  -2   12.76    0.72
   5  -1  -2   11.84    0.58
   5  -1  -2   11.19    0.67
  -1  -5  -2   13.58    0.69
  -1  -5  -2   12.47    0.56
  -5   1  -2   12.40    0.64
   1   5  -2   13.89    0.75
   1   5  -2   12.47    0.70
  -1  -5   2   12.93    0.57
  -1  -5   2   12.62    0.65
  -1  -5   2   13.29    0.70
   1   5   2   12.79    0.57
   5  -1   2   12.38    0.63
  -5   1   2   12.46    0.66
   5  -1   2   13.21    0.65
   1   5   2   12.03    0.68
   1   5   2   11.59    0.68
  -5   1   2   12.41    0.59
  -5   2  -2   63.70    2.36
  -5   2  -2   65.25    2.40
   5  -2  -2   61.46    2.36
  -2  -5  -2   63.09    2.39
   5  -2  -2   60.24    2.45
   2   5  -2   63.15    2.31
  -2  -5  -2   63.22    2.30
   2   5  -2   62.18    2.43
   5  -2  -2   62.28    2.31
  -2  -5  -2   63.90    2.40
   2   5  -2   65.42    2.38
   2   5   2   60.79    2.38
  -5   2   2   59.69    2.34
  -2  -5   2   58.44    2.41
  -2  -5   2   60.84    2.30
   2   5   2   65.62    2.44
   5  -2   2   62.22    2.38
   5  -2   2   57.49    2.35
  -2  -5   2   63.76    2.35
  -5   2   2   63.58    2.48
  -5   2   2   61.59    2.32
   5  -2   2   64.06    2.38
   2   5   2   61.78    2.31
   3   5  -2    2.86    0.27
  -5   3  -2    2.23    0.24
   3   5  -2    2.46    0.29
   3   5  -2    2.96    0.28
  -3  -5  -2    2.24    0.31
   5  -3  -2    2.48    0.26
  -3  -5  -2    2.08    0.33
   5  -3  -2    2.30    0.37
  -5   3  -2    3.02    0.30
  -3  -5  -2    2.33    0.25
   5  -3  -2    2.83    0.27
   3   5   2    2.32    0.26
  -3  -5   2    3.06    0.32
  -5   3   2    1.66    0.30
   5  -3   2    2.64    0.29
  -3  -5   2    3.44    0.28
   5  -3   2    2.99    0.28
  -5   3   2    2.91    0.32
   3   5   2    2.54    0.27
  -3  -5   2    3.15    0.27
   3   5   2    2.35    0.28
  -5   3   2    2.64    0.26
   5  -3   2    2.93    0.30
  -4  -5  -2  348.60   11.89
   5  -4  -2  343.32   11.90
   4   5  -2  338.37   11.96
  -5   4  -2  341.94   11.95
   5  -4  -2  359.69   11.82
   5  -4  -2  344.43   12.05
  -4  -5  -2  343.14   12.01
   4   5  -2  340.84   11.92
  -5   4  -2  342.31   11.80
   4   5  -2  349.86   11.99
   4   5   2  351.74   11.96
   4   5   2  332.06   11.87
   5  -4   2  343.31   11.94
  -5   4   2  340.76   11.90
   5  -4   2  351.29   11.82
  -5   4   2  348.87   11.82
  -4  -5   2  354.74   11.84
   5  -4   2  341.87   11.98
  -4  -5   2  332.69   11.96
   5  -4   2  332.73   11.98
   4   5   2  354.88   11.94
  -4  -5   2  347.26   11.89
   5   5  -2    0.29    0.14
   5  -5  -2    0.37    0.16
   5   5  -2    0.29    0.17
  -5  -5  -2    0.29    0.16
  -5   5  -2    0.22    0.17
   5   5  -2    0.58    0.22
  -5  -5  -2    0.13    0.16
  -5   5  -2    0.44    0.14
  -5  -5  -2    0.23    0.13
   5  -5  -2    0.52    0.23
   5  -5  -2    0.21    0.17
  -5  -5  -2    0.15    0.14
   5  -5  -2    0.40    0.13
  -5   5   2    0.38    0.15
  -5  -5   2    0.15    0.13
   5  -5   2    0.40    0.14
   5  -5   2    0.41    0.16
  -5  -5   2    0.13    0.16
  -5   5   2    0.25    0.12
   5   5   2    0.16    0.14
   5  -5   2    0.05    0.16
  -5  -5   2    0.19    0.16
   5   5   2    0.13    0.13
   5  -6  -2  111.05    4.37
   6   5  -2  118.52    4.43
  -5   6  -2  114.26    4.15
  -6  -5  -2  111.99    4.36
   6   5  -2  113.31    4.37
  -6  -5  -2  116.95    4.37
  -5   6  -2  110.02    4.46
   5  -6  -2  113.20    4.51
   5  -6  -2  114.08    4.15
  -5   6  -2  114.81    4.42
  -6  -5  -2  123.88    4.36
  -6  -5  -2  114.99    4.31
   5  -6   2  121.22    4.17
  -5   6   2  118.32    4.16
  -6  -5   2  122.31    4.25
   5  -6   2  122.67    4.48
  -6  -5   2  121.35    4.39
  -6  -5   2  116.97    4.28
  -5   6   2  121.11    4.41
   6   5   2  128.19    4.47
  -6  -5   2  122.13    4.44
   6   5   2  121.56    4.31
   4  -6  -2   50.64    2.12
  -4   6  -2   52.81    2.15
   4  -6  -2   49.92    2.22
  -6  -4  -2   51.14    2.11
  -6  -4  -2   50.89    2.06
   6   4  -2   50.20    2.14
   6   4  -2   50.49    2.09
  -4   6  -2   49.53    2.18
  -6  -4  -2   50.28    2.08
   4  -6  -2   50.84    2.22
   4  -6  -2   51.45    1.86
  -4   6  -2   52.09    1.86
  -6  -4   2   51.79    2.12
   4  -6   2   53.20    1.87
   4  -6   2   49.64    2.15
  -4   6   2   53.63    1.87
  -6  -4   2   48.76    1.96
   6   4   2   53.72    2.17
  -6  -4   2   50.46    2.13
   4  -6   2   51.84    2.14
   6   4   2   49.45    2.00
  -6  -4   2   52.60    2.00
  -4   6   2   51.68    2.13
  -3   6  -2   38.98    1.76
  -3   6  -2   39.96    1.72
  -6  -3  -2   41.27    1.67
  -6  -3  -2   38.93    1.60
   6   3  -2   41.88    1.75
   3  -6  -2   41.37    1.72
  -3   6  -2   40.57    1.43
   3  -6  -2   40.96    1.42
   3  -6  -2   38.84    1.77
  -6  -3  -2   39.22    1.70
   3  -6  -2   39.84    1.42
   3  -6   2   38.86    1.71
  -6  -3   2   41.10    1.72
   3  -6   2   40.00    1.43
   3  -6   2   38.36    1.73
  -6  -3   2   40.03    1.55
  -3   6   2   35.57    1.76
  -3   6   2   38.94    1.71
   6   3   2   38.65    1.58
  -6  -3   2   38.24    1.55
  -6  -3   2   39.66    1.71
   6   3   2   41.70    1.76
  -2   6  -2  148.11    4.94
  -2   6  -2  141.52    4.94
  -6  -2  -2  138.37    5.25
  -2   6  -2  135.32    5.31
  -2   6  -2  151.25    5.30
   6   2  -2  141.55    5.22
  -6  -2  -2  139.01    5.14
  -6  -2  -2  137.00    5.19
   2  -6  -2  141.25    5.26
   2  -6  -2  140.22    5.32
   6   2  -2  147.73    5.31
   2  -6  -2  141.56    4.93
   6   2  -2  136.85    5.08
  -2   6   2  154.21    5.31
   2  -6   2  149.96    5.29
   6   2   2  149.35    5.32
  -6  -2   2  151.24    5.29
  -6  -2   2  150.73    5.29
   2  -6   2  149.14    5.32
  -6  -2   2  154.26    5.11
   6   2   2  152.32    5.13
   6   2   2  154.47    5.22
  -2   6   2  145.61    5.36
  -6  -1  -2  135.74    4.62
  -6  -1  -2  133.80    4.66
  -6  -1  -2  134.26    4.72
  -1   6  -2  134.71    4.73
   6   1  -2  131.04    4.53
   6   1  -2  136.58    4.76
   6   1  -2  135.38    4.70
   1  -6  -2  126.62    4.74
   1  -6  -2  133.21    4.72
  -1   6  -2  131.61    4.77
  -1   6  -2  133.07    4.41
  -1   6  -2  139.01    4.52
  -1   6   2  124.17    4.40
   6   1   2  128.92    4.57
   6   1   2  118.22    4.61
  -1   6   2  122.45    4.76
   6   1   2  126.50    4.73
  -6  -1   2  123.10    4.53
  -6  -1   2  119.18    4.68
   1  -6   2  121.82    4.72
   1  -6   2  124.92    4.69
  -1   6   2  133.45    4.74
  -6  -1   2  125.24    4.72
   0  -6  -2    1.74    0.31
   0   6  -2    1.58    0.27
   0   6  -2    1.54    0.28
  -6   0  -2    1.42    0.31
   0  -6  -2    1.58    0.27
   0  -6  -2    1.30    0.13
   6   0  -2    1.54    0.26
  -6   0  -2    1.48    0.25
   6   0  -2    1.84    0.31
  -6   0  -2    1.88    0.27
   6   0  -2    1.69    0.19
   0   6  -2    1.32    0.14
   0  -6   2    1.23    0.14
   0  -6   2    1.90    0.32
  -6   0   2    1.88    0.31
   6   0   2    1.57    0.26
  -6   0   2    1.74    0.35
   0   6   2    1.58    0.15
  -6   0   2    1.43    0.20
   6   0   2    1.70    0.24
   0   6   2    1.60    0.28
   6   0   2    1.65    0.28
   6  -1  -2  125.36    4.65
  -6   1  -2  125.53    4.61
   6  -1  -2  126.99    4.69
   6  -1  -2  124.60    4.51
   1   6  -2  125.35    4.47
  -1  -6  -2  121.03    4.64
  -1  -6  -2  122.23    4.46
  -6   1  -2  122.40    4.63
   1   6  -2  119.81    4.68
   1   6  -2  116.85    4.62
  -1  -6  -2  123.00    4.64
  -6   1  -2  116.56    4.59
  -1  -6   2  130.11    4.48
  -1  -6   2  139.55    4.65
  -1  -6   2  131.24    4.70
  -6   1   2  135.88    4.66
  -6   1   2  133.66    4.54
  -6   1   2  140.01    4.76
   1   6   2  132.61    4.49
   6  -1   2  133.22    4.61
   1   6   2  130.21    4.69
   6  -1   2  132.92    4.62
   1   6   2  130.50    4.70
   6  -1   2  134.85    4.68
   2   6  -2  143.89    5.31
   2   6  -2  154.82    5.15
  -2  -6  -2  149.46    5.12
  -6   2  -2  149.97    5.23
   6  -2  -2  154.86    5.16
   2   6  -2  151.83    5.26
  -2  -6  -2  160.89    5.30
  -2  -6  -2  151.45    5.27
  -6   2  -2  155.65    5.26
  -6   2  -2  146.77    5.40
   6  -2  -2  151.99    5.25
   2   6   2  141.62    5.14
  -2  -6   2  141.87    5.12
  -6   2   2  142.52    5.16
   6  -2   2  140.41    5.23
  -2  -6   2  134.77    5.27
   2   6   2  136.71    5.28
  -6   2   2  143.15    5.22
   6  -2   2  139.73    5.32
  -6   2   2  140.05    5.33
  -2  -6   2  153.00    5.23
   2   6   2  134.09    5.24
   6  -2   2  137.14    5.23
  -6   3  -2   40.31    1.68
  -3  -6  -2   39.08    1.67
   6  -3  -2   39.96    1.62
   6  -3  -2   38.78    1.75
  -6   3  -2   39.31    1.62
  -3  -6  -2   39.39    1.66
  -3  -6  -2   39.24    1.59
   3   6  -2   35.45    1.69
   6  -3  -2   40.75    1.64
   3   6  -2   39.73    1.67
  -3  -6   2   39.75    1.60
   6  -3   2   40.62    1.65
  -3  -6   2   42.58    1.65
   3   6   2   37.83    1.70
   3   6   2   38.28    1.66
  -6   3   2   40.68    1.79
   6  -3   2   40.98    1.71
   6  -3   2   40.44    1.71
  -3  -6   2   38.85    1.72
  -6   3   2   40.77    1.64
   6  -3   2   38.92    1.66
  -6   3   2   39.37    1.62
   4   6  -2   51.86    2.14
   4   6  -2   51.86    2.07
   6  -4  -2   49.86    2.20
  -4  -6  -2   52.80    2.05
  -4  -6  -2   53.33    2.10
   6  -4  -2   51.27    2.07
   4   6  -2   52.28    2.08
  -4  -6  -2   51.58    2.09
  -6   4  -2   52.89    2.01
  -6   4  -2   52.71    2.13
   6  -4  -2   52.83    2.02
   6  -4   2   47.47    2.11
   6  -4   2   51.07    2.15
   4   6   2   52.41    2.08
   6  -4   2   52.39    2.03
  -6   4   2   51.31    2.07
  -4  -6   2   50.91    2.04
  -6   4   2   50.07    2.00
  -4  -6   2   50.49    2.15
  -4  -6   2   54.26    2.04
   4   6   2   49.20    2.08
  -6   4   2   48.58    2.19
   6  -4   2   50.78    2.10
   4   6   2   48.57    2.11
   6  -5  -2  118.22    4.50
   6  -5  -2  115.41    4.32
   6  -5  -2  120.32    4.22
   5   6  -2  122.51    4.36
  -5  -6  -2  118.88    4.31
   5   6  -2  112.98    4.28
  -6   5  -2  121.31    4.20
  -5  -6  -2  120.04    4.32
   5   6  -2  115.90    4.37
  -5  -6  -2  123.84    4.34
  -6   5  -2  125.04    4.41
  -6   5   2  113.84    4.19
   5   6   2  112.46    4.42
  -5  -6   2  111.61    4.38
   5   6   2  112.27    4.36
  -5  -6   2  117.94    4.30
   6  -5   2  116.76    4.31
  -6   5   2  112.33    4.32
   6  -5   2  114.83    4.41
   6  -5   2  114.69    4.42
  -5  -6   2  112.26    4.29
   5   6   2  113.31    4.34
  -6  -6  -2    5.01    0.43
   6   6  -2    4.03    0.39
   6  -6  -2    3.95    0.47
   6   6  -2    3.67    0.42
   6  -6  -2    4.15    0.33
  -6  -6  -2    4.04    0.41
  -6   6  -2    4.28    0.44
  -6  -6  -2    4.16    0.39
  -6   6  -2    3.54    0.32
   6  -6   2    4.17    0.47
  -6   6   2    4.37    0.34
  -6   6   2    4.41    0.45
  -6  -6   2    3.83    0.44
  -6  -6   2    3.70    0.35
   6  -6   2    3.80    0.32
   6   6   2    4.45    0.42
   6   6   2    4.01    0.53
  -7  -6  -2    1.48    0.32
   7   6  -2    2.22    0.44
  -6   7  -2    2.73    0.46
   6  -7  -2    1.69    0.24
  -7  -6  -2    2.87    0.41
   6  -7  -2    1.54    0.38
  -6   7  -2    1.97    0.26
  -7  -6   2    2.79    0.31
  -6   7   2    2.01    0.27
   7   6   2    1.90    0.39
   6  -7   2    3.07    0.48
   7   6   2    2.27    0.35
  -6   7   2    2.65    0.45
   6  -7   2    2.30    0.24
  -7  -6   2    2.93    0.38
  -7  -6   2    1.99    0.37
   5  -7  -2    3.71    0.47
  -5   7  -2    5.21    0.50
  -7  -5  -2    4.50    0.42
   5  -7  -2    5.60    0.32
   7   5  -2    3.85    0.45
  -5   7  -2    4.85    0.31
   7   5  -2    4.99    0.48
  -7  -5  -2    4.61    0.45
  -7  -5  -2    4.66    0.44
  -7  -5   2    5.01    0.39
   7   5   2    4.45    0.50
   5  -7   2    4.57    0.50
   7   5   2    5.05    0.49
  -5   7   2    5.42    0.32
  -7  -5   2    4.41    0.39
  -5   7   2    5.98    0.53
   5  -7   2    4.74    0.31
  -7  -5   2    5.28    0.49
  -7  -4  -2    6.43    0.48
   7   4  -2    6.34    0.51
   7   4  -2    5.13    0.50
  -7  -4  -2    6.59    0.47
   4  -7  -2    6.25    0.57
  -7  -4  -2    6.76    0.51
   4  -7  -2    6.30    0.31
  -4   7  -2    6.29    0.53
   4  -7  -2    6.43    0.31
  -4   7  -2    5.74    0.30
   4  -7   2    5.90    0.53
   4  -7   2    5.68    0.31
   7   4   2    6.57    0.46
  -4   7   2    6.05    0.53
  -7  -4   2    5.74    0.41
  -7  -4   2    5.81    0.43
  -7  -4   2    5.95    0.52
   7   4   2    6.39    0.55
  -7  -3  -2  119.50    4.17
  -7  -3  -2  121.90    4.25
   3  -7  -2  111.33    4.29
   7   3  -2  115.36    4.17
  -3   7  -2  113.53    4.24
   7   3  -2  113.87    4.26
   3  -7   2  109.68    4.26
  -7  -3   2  110.51    4.21
   7   3   2  108.97    4.11
  -7  -3   2  107.54    4.02
   7   3   2  108.82    4.25
   7   3   2  110.02    4.05
  -3   7   2  112.39    4.23
  -7  -3   2  105.39    4.00
  -7  -2  -2   16.44    0.92
   7   2  -2   17.85    0.97
  -2   7  -2   17.71    1.01
   7   2  -2   17.68    0.91
  -2   7  -2   17.69    0.95
   2  -7  -2   16.14    0.92
  -7  -2  -2   17.97    0.86
   2  -7  -2   16.07    0.96
  -7  -2  -2   18.14    0.90
   7   2  -2   16.39    0.78
   2  -7   2   16.35    0.93
  -7  -2   2   16.57    0.93
   7   2   2   17.69    0.97
   7   2   2   17.73    0.82
   2  -7   2   15.70    0.94
  -2   7   2   16.58    0.94
  -7  -2   2   16.82    0.79
  -7  -2   2   15.45    0.91
  -2   7   2   16.56    0.99
   7   2   2   16.65    0.96
  -7  -1  -2   70.37    2.75
   7   1  -2   70.12    2.56
  -7  -1  -2   73.21    2.70
   1  -7  -2   76.52    2.79
   1  -7  -2   67.92    2.43
  -1   7  -2   71.13    2.76
  -7  -1  -2   68.87    2.65
   7   1  -2   68.18    2.70
  -1   7  -2   66.16    2.80
   1  -7  -2   70.39    2.80
   7   1  -2   73.05    2.79
  -1   7  -2   71.63    2.40
  -1   7   2   68.44    2.76
  -1   7   2   70.32    2.40
   7   1   2   65.20    2.76
   1  -7   2   68.91    2.78
  -7  -1   2   67.70    2.76
  -7  -1   2   71.06    2.57
   7   1   2   68.22    2.60
  -1   7   2   64.75    2.80
  -7  -1   2   68.00    2.74
   1  -7   2   68.09    2.74
   0   7  -2    4.96    0.46
   7   0  -2    4.62    0.34
   0  -7  -2    4.32    0.41
   0   7  -2    4.88    0.27
   0   7  -2    4.94    0.44
  -7   0  -2    4.80    0.45
   7   0  -2    4.75    0.42
   0  -7  -2    4.24    0.43
  -7   0  -2    4.83    0.40
  -7   0  -2    4.94    0.41
   0  -7  -2    4.04    0.25
   7   0  -2    5.67    0.47
   0   7   2    3.53    0.43
   0  -7   2    4.97    0.45
   0   7   2    4.68    0.27
  -7   0   2    4.50    0.34
   0  -7   2    4.68    0.44
  -7   0   2    5.20    0.46
   7   0   2    5.31    0.47
  -7   0   2    3.37    0.38
   7   0   2    5.52    0.39
   0  -7   2    4.69    0.28
   0   7   2    4.88    0.45
  -7   1  -2   69.76    2.71
  -1  -7  -2   69.66    2.51
  -7   1  -2   69.96    2.72
  -1  -7  -2   67.65    2.74
   1   7  -2   64.11    2.71
   1   7  -2   64.97    2.77
  -1  -7  -2   68.64    2.73
   1   7  -2   69.17    2.52
   7  -1  -2   71.59    2.77
   7  -1  -2   68.90    2.74
   7  -1  -2   65.12    2.57
  -7   1  -2   71.69    2.69
  -1  -7   2   71.15    2.72
   1   7   2   77.73    2.82
   7  -1   2   69.52    2.68
  -1  -7   2   69.56    2.52
  -1  -7   2   69.36    2.77
  -7   1   2   71.33    2.81
  -7   1   2   71.99    2.61
   7  -1   2   70.72    2.75
   7  -1   2   70.26    2.68
  -7   1   2   69.37    2.72
   1   7   2   70.83    2.53
   1   7   2   66.07    2.76
   2   7  -2   16.93    0.80
  -2  -7  -2   17.90    0.80
   7  -2  -2   17.06    0.83
   7  -2  -2   16.51    0.91
  -7   2  -2   17.63    0.92
   2   7  -2   16.22    0.90
   2   7  -2   16.46    0.95
  -7   2  -2   16.25    0.88
   7  -2  -2   17.61    0.97
  -2  -7  -2   17.26    0.93
  -7   2  -2   16.80    0.89
  -2  -7  -2   20.32    0.97
  -2  -7   2   17.16    0.95
   7  -2   2   19.02    0.94
  -7   2   2   15.97    0.97
  -2  -7   2   16.30    0.79
   7  -2   2   17.67    0.91
  -2  -7   2   16.34    0.88
   2   7   2   16.17    0.93
  -7   2   2   17.02    0.89
  -7   2   2   16.98    0.85
   7  -2   2   16.13    0.87
   2   7   2   18.04    0.82
   2   7   2   17.93    0.97
   3   7  -2  115.41    4.23
   7  -3  -2  110.57    4.32
   7  -3  -2  113.21    4.19
  -3  -7  -2  112.33    4.10
   3   7  -2  113.17    4.13
   3   7  -2  103.30    4.25
  -7   3  -2  106.96    4.20
  -3  -7  -2  121.76    4.26
  -7   3  -2  108.47    4.16
  -3  -7  -2  108.68    4.21
   7  -3   2  111.36    4.25
   3   7   2  113.50    4.29
  -3  -7   2  112.03    4.10
   7  -3   2  113.19    4.27
   7  -3   2  114.79    4.21
   3   7   2  112.52    4.24
  -7   3   2  114.68    4.18
  -3  -7   2  113.89    4.29
  -3  -7   2  129.71    4.23
   3   7   2  117.39    4.15
   7  -3   2  110.97    4.20
  -7   3   2  116.00    4.36
  -7   3   2  118.58    4.18
   7  -4  -2    5.92    0.46
  -4  -7  -2    6.25    0.50
  -7   4  -2    6.02    0.52
   4   7  -2    5.60    0.46
  -4  -7  -2    5.65    0.51
   4   7  -2    6.04    0.49
   7  -4  -2    5.08    0.45
  -4  -7  -2    6.23    0.56
  -7   4   2    5.86    0.56
   4   7   2    6.34    0.54
   4   7   2    6.18    0.49
  -4  -7   2    5.48    0.44
   7  -4   2    6.70    0.60
  -4  -7   2    5.60    0.50
   7  -4   2    6.09    0.53
  -7   4   2    5.79    0.46
   7  -4   2    5.84    0.46
   7  -4   2    6.58    0.54
  -4  -7   2    6.45    0.55
   4   7   2    6.19    0.48
  -5  -7  -2    4.04    0.43
   7  -5  -2    4.35    0.51
  -5  -7  -2    5.36    0.46
  -7   5  -2    4.51    0.39
   7  -5  -2    5.00    0.41
  -7   5  -2    4.76    0.47
   5   7  -2    4.18    0.43
   5   7  -2    4.41    0.45
   7  -5  -2    4.54    0.45
   7  -5   2    5.00    0.42
   5   7   2    4.42    0.44
  -5  -7   2    4.17    0.40
   5   7   2    4.78    0.47
  -7   5   2    4.91    0.41
  -5  -7   2    5.03    0.49
  -7   5   2    6.08    0.47
   7  -5   2    4.92    0.49
   5   7   2    4.83    0.43
  -5  -7   2    4.69    0.44
   7  -5   2    5.31    0.53
   7  -6  -2    1.88    0.29
  -6  -7  -2    2.71    0.42
   6   7  -2    1.85    0.39
  -7   6  -2    2.29    0.43
   6   7  -2    2.35    0.37
   7  -6  -2    2.27    0.46
  -7   6  -2    2.57    0.32
  -7   6   2    2.06    0.30
   6   7   2    1.81    0.39
   7  -6   2    2.17    0.32
  -6  -7   2    1.89    0.39
   6   7   2    2.19    0.37
  -7   6   2    2.22    0.41
   7  -6   2    1.96    0.39
  -6  -7   2    2.66    0.36
  -7  -7  -2  168.82    6.17
  -7   7  -2  177.11    6.30
   7  -7  -2  163.16    6.38
   7   7  -2  166.63    6.25
   7  -7  -2  171.77    5.98
  -7  -7  -2  171.97    6.22
  -7   7  -2  171.94    5.96
  -7  -7   2  169.63    6.06
  -7  -7   2  167.55    6.26
  -7   7   2  166.38    5.96
   7   7   2  163.45    6.14
   7  -7   2  165.78    5.97
   7   7   2  168.99    6.26
   7  -7   2  169.62    6.32
  -7   7   2  166.68    6.22
   8   7  -2   12.02    0.88
  -8  -7  -2   12.09    0.83
  -7   8  -2   11.45    0.84
  -7   8  -2   10.26    0.61
   7  -8  -2   11.34    0.92
  -8  -7  -2   10.84    0.77
   7  -8  -2   11.34    0.62
  -7   8   2   11.93    0.84
  -8  -7   2   11.81    0.86
  -7   8   2   12.03    0.63
   8   7   2   11.35    0.86
   7  -8   2   12.34    0.91
   7  -8   2   12.35    0.64
  -8  -7   2   11.42    0.72
  -8  -7   2   10.71    0.73
  -8  -6  -2   65.41    2.78
  -8  -6  -2   64.33    2.73
  -6   8  -2   68.74    2.49
   8   6  -2   71.18    2.92
   6  -8  -2   69.85    2.50
  -6   8  -2   66.00    2.86
   6  -8  -2   67.18    2.97
   6  -8   2   66.02    2.90
  -6   8   2   71.58    2.50
  -6   8   2   65.13    2.83
  -8  -6   2   69.86    2.67
   6  -8   2   69.78    2.50
   8   6   2   64.98    2.87
  -8  -6   2   71.11    2.72
  -8  -6   2   71.70    2.89
   8   6   2   66.42    2.71
  -5   8  -2   23.77    0.86
   8   5  -2   24.23    1.28
   5  -8  -2   22.73    1.28
   5  -8  -2   22.23    0.84
   5  -8  -2   22.16    0.84
  -8  -5  -2   22.23    1.14
  -5   8  -2   24.35    1.25
  -8  -5  -2   21.21    1.09
  -8  -5   2   20.99    1.01
   8   5   2   19.29    1.18
   5  -8   2   19.94    0.84
   5  -8   2   18.31    1.17
   8   5   2   17.86    1.01
  -8  -5   2   20.80    1.17
  -5   8   2   17.47    1.12
  -8  -5   2   19.44    1.01
  -8  -4  -2   13.17    0.77
  -4   8  -2   11.91    0.83
  -8  -4  -2   12.86    0.75
   4  -8  -2   11.51    0.86
  -8  -4  -2   11.62    0.76
   8   4  -2   12.96    0.87
  -8  -4   2   13.59    0.70
  -8  -4   2   13.13    0.72
   4  -8   2   14.35    0.91
   8   4   2   12.06    0.87
  -8  -4   2   12.57    0.83
  -4   8   2   12.50    0.83
   8   3  -2    9.36    0.66
  -8  -3  -2   10.06    0.64
  -8  -3  -2    8.92    0.64
  -3   8  -2   10.97    0.74
   8   3  -2   11.98    0.80
   3  -8  -2   10.58    0.80
  -8  -3   2   10.88    0.73
   8   3   2    9.76    0.61
   8   3   2   10.68    0.67
  -8  -3   2   10.63    0.60
   3  -8   2   11.18    0.79
   8   3   2    9.37    0.74
  -3   8   2   10.12    0.73
  -8  -3   2   10.60    0.59
  -8  -2  -2  221.72    7.42
   8   2  -2  213.29    7.57
  -8  -2  -2  217.53    7.44
   8   2  -2  220.18    7.30
   8   2  -2  211.40    7.45
   2  -8  -2  217.90    7.61
  -2   8  -2  220.70    7.56
  -8  -2   2  203.80    7.52
   8   2   2  202.42    7.32
   2  -8   2  193.64    7.52
   8   2   2  193.54    7.53
   8   2   2  200.22    7.39
  -2   8   2  198.13    7.51
   8   1  -2   55.76    2.21
  -8  -1  -2   59.71    2.35
  -8  -1  -2   58.05    2.33
   1  -8  -2   57.72    2.47
  -1   8  -2   64.29    2.47
   8   1  -2   55.20    2.35
   8   1  -2   56.58    2.44
   1  -8   2   58.04    2.45
   8   1   2   60.73    2.48
  -8  -1   2   59.09    2.45
   8   1   2   56.55    2.31
  -1   8   2   57.40    2.45
   8   1   2   59.03    2.28
   0   8  -2   15.53    0.62
   8   0  -2   15.15    0.74
   8   0  -2   14.77    0.89
   8   0  -2   14.65    0.86
  -8   0  -2   14.56    0.82
   0  -8  -2   15.19    0.90
  -8   0  -2   14.01    0.81
   0  -8  -2   14.73    0.61
   0   8  -2   14.04    0.88
   0  -8   2   14.11    0.88
   8   0   2   13.84    0.80
   0   8   2   14.78    0.62
  -8   0   2   15.50    0.76
   8   0   2   14.66    0.78
   0   8   2   12.11    0.84
   8   0   2   14.39    0.89
  -8   0   2   13.93    0.89
  -8   1  -2   63.17    2.40
   1   8  -2   60.49    2.17
  -1  -8  -2   60.97    2.44
   8  -1  -2   57.26    2.41
  -1  -8  -2   60.60    2.15
   8  -1  -2   60.40    2.44
   8  -1  -2   57.92    2.25
   1   8  -2   58.91    2.42
  -8   1  -2   59.01    2.35
  -1  -8   2   56.66    2.15
   1   8   2   55.54    2.43
   8  -1   2   57.15    2.41
  -8   1   2   58.60    2.27
   8  -1   2   56.47    2.32
  -1  -8   2   57.46    2.44
  -8   1   2   55.52    2.45
   1   8   2   57.99    2.16
   8  -1   2   55.12    2.32
   2   8  -2  204.53    7.32
  -8   2  -2  199.42    7.47
  -2  -8  -2  203.31    7.53
  -8   2  -2  204.36    7.51
   2   8  -2  201.65    7.52
   8  -2  -2  200.01    7.57
  -8   2  -2  194.73    7.47
   8  -2  -2  202.87    7.51
  -2  -8  -2  203.54    7.30
  -8   2   2  219.50    7.42
   8  -2   2  216.23    7.54
   2   8   2  217.82    7.62
  -8   2   2  215.63    7.65
  -8   2   2  214.87    7.51
  -2  -8   2  215.03    7.60
   8  -2   2  210.43    7.47
  -2  -8   2  241.87    7.71
   8  -2   2  212.35    7.50
   2   8   2  217.82    7.34
  -2  -8   2  210.86    7.31
  -3  -8  -2   10.32    0.70
   8  -3  -2    9.66    0.62
  -3  -8  -2   10.65    0.60
  -8   3  -2   10.24    0.67
  -8   3  -2   10.52    0.69
   3   8  -2   10.21    0.61
   3   8  -2   10.65    0.70
   8  -3  -2   10.46    0.69
  -3  -8   2   10.51    0.75
  -8   3   2    9.17    0.63
   3   8   2    9.39    0.60
  -3  -8   2    9.06    0.65
  -3  -8   2    9.66    0.58
  -8   3   2   10.13    0.76
   8  -3   2    9.98    0.70
  -8   3   2    8.79    0.64
   3   8   2   10.07    0.73
   8  -3   2    9.73    0.67
   8  -3   2    9.85    0.69
   4   8  -2   12.69    0.75
   4   8  -2   13.86    0.82
  -4  -8  -2   12.73    0.79
   8  -4  -2   11.27    0.73
  -8   4  -2   13.25    0.82
  -8   4  -2   11.60    0.73
  -4  -8  -2   12.12    0.71
   8  -4  -2   12.70    0.76
   8  -4   2   12.04    0.82
   4   8   2   12.72    0.74
  -4  -8   2   12.68    0.83
  -4  -8   2   11.67    0.71
   8  -4   2   12.51    0.82
  -4  -8   2   12.63    0.84
  -8   4   2   13.29    0.91
   8  -4   2   11.92    0.75
  -8   4   2   10.81    0.71
   4   8   2   11.70    0.81
  -8   4   2   12.97    0.77
  -5  -8  -2   18.43    1.08
   8  -5  -2   17.97    1.20
   5   8  -2   17.24    1.05
  -5  -8  -2   19.01    1.03
   8  -5  -2   19.44    1.03
   5   8  -2   19.21    1.07
  -8   5  -2   18.21    1.00
  -8   5  -2   19.44    1.12
   5   8   2   22.68    1.20
  -5  -8   2   24.85    1.25
   5   8   2   22.70    1.13
  -5  -8   2   22.75    1.08
  -8   5   2   23.52    1.08
   8  -5   2   21.70    1.20
  -8   5   2   22.40    1.13
   8  -5   2   22.31    1.08
   8  -6  -2   67.75    2.97
  -6  -8  -2   67.85    2.78
  -8   6  -2   68.05    2.63
  -8   6  -2   71.28    2.85
   6   8  -2   67.66    2.76
   8  -6  -2   69.51    2.65
   6   8  -2   68.54    2.79
   6   8   2   64.12    2.81
  -8   6   2   65.86    2.76
   8  -6   2   67.43    2.65
   6   8   2   67.00    2.79
   8  -6   2   65.67    2.86
  -6  -8   2   66.83    2.85
  -8   6   2   65.03    2.62
  -8   7  -2   11.38    0.94
  -7  -8  -2   12.53    0.81
  -8   7  -2   13.03    0.89
   8  -7  -2   11.94    0.70
   7   8  -2   10.76    0.83
   7   8  -2   11.11    0.79
  -7  -8  -2   12.59    0.85
   8  -7  -2   11.31    0.93
   7   8   2   10.85    0.83
   8  -7   2   11.53    0.69
  -8   7   2   10.83    0.80
  -7  -8   2    9.96    0.81
   8  -7   2   10.99    0.86
   8  -8  -2   22.01    1.03
  -8  -8  -2   22.25    1.22
  -8   8  -2   19.07    1.39
   8  -8  -2   24.82    1.47
   8   8  -2   20.85    1.27
  -8  -8  -2   22.93    1.28
  -8   8  -2   21.80    1.03
  -8  -8   2   21.33    1.17
   8   8   2   21.33    1.27
  -8   8   2   21.39    1.26
   8  -8   2   20.98    1.31
  -8   8   2   19.85    1.01
   8  -8   2   21.55    1.03
  -8  -8   2   21.21    1.28
   8  -9  -2   24.96    1.07
  -8   9  -2   21.55    1.33
  -9  -8  -2   24.30    1.29
   9   8  -2   25.29    1.44
   8  -9  -2   24.36    1.50
  -8   9  -2   24.39    1.05
  -9  -8  -2   23.88    1.32
   9   8   2   20.60    1.35
  -8   9   2   20.88    1.30
  -9  -8   2   21.85    1.22
  -8   9   2   20.71    1.02
   8  -9   2   19.40    1.34
   8  -9   2   21.00    1.03
  -9  -8   2   23.66    1.38
   7  -9  -2   25.55    1.50
   7  -9  -2   24.91    1.05
  -9  -7  -2   25.37    1.36
  -7   9  -2   22.25    1.36
  -9  -7  -2   23.90    1.30
  -7   9  -2   23.90    1.04
   9   7  -2   24.56    1.46
  -9  -7   2   24.86    1.26
   9   7   2   27.65    1.52
  -7   9   2   24.56    1.04
   7  -9   2   24.40    1.05
  -9  -7   2   24.73    1.41
  -9  -6  -2   71.64    2.92
  -9  -6  -2   72.45    2.96
   6  -9  -2   70.05    3.39
   9   6  -2   72.56    3.10
   6  -9  -2   71.43    2.57
  -6   9  -2   73.31    2.57
   6  -9  -2   70.36    2.57
  -6   9  -2   71.56    3.28
   6  -9   2   73.07    2.58
   6  -9   2   73.11    3.11
   9   6   2   72.34    3.09
  -9  -6   2   72.74    2.85
  -9  -6   2   68.31    3.02
  -9  -6   2   70.96    2.80
  -6   9   2   74.69    3.07
   9   5  -2   16.51    1.09
  -9  -5  -2   16.64    0.96
  -5   9  -2   16.50    1.06
  -9  -5  -2   16.58    0.99
   5  -9  -2   18.21    1.16
  -5   9   2   15.97    1.05
   5  -9   2   18.09    1.13
  -9  -5   2   16.01    0.87
   9   5   2   17.02    1.10
   9   5   2   17.22    0.95
  -9  -5   2   18.38    0.95
  -9  -5   2   16.96    1.05
  -9  -4  -2   51.50    2.14
   4  -9  -2   52.53    2.38
  -4   9  -2   52.50    2.29
  -9  -4  -2   53.68    2.19
   9   4  -2   53.97    2.35
  -4   9   2   49.58    2.27
   4  -9   2   49.04    2.30
  -9  -4   2   47.61    2.02
  -9  -4   2   48.03    2.23
   9   4   2   51.86    2.33
  -9  -4   2   52.62    2.08
   9   4   2   48.97    2.08
  -3   9  -2   25.74    1.40
   9   3  -2   27.03    1.46
   3  -9  -2   25.18    1.44
  -9  -3  -2   26.22    1.29
  -9  -3  -2   25.14    1.30
   9   3   2   26.73    1.41
  -9  -3   2   29.59    1.25
   9   3   2   27.44    1.25
   9   3   2   28.68    1.48
  -9  -3   2   27.53    1.41
  -9  -3   2   29.58    1.24
   3  -9   2   26.61    1.44
  -3   9   2   25.81    1.41
  -2   9  -2   44.92    2.00
  -9  -2  -2   44.00    1.87
  -9  -2  -2   45.43    1.89
   9   2  -2   44.61    2.03
   9   2  -2   40.41    1.74
   2  -9  -2   45.52    2.04
   9   2   2   42.03    1.85
   9   2   2   42.12    2.01
  -2   9   2   43.26    2.00
  -9  -2   2   41.58    1.96
  -9  -2   2   43.99    1.77
   2  -9   2   45.05    2.02
   9   2   2   40.34    1.89
  -9  -1  -2   14.41    0.84
   1  -9  -2   14.00    0.93
   9   1  -2   13.86    0.74
  -1   9  -2   14.42    0.91
   9   1  -2   14.08    0.93
  -9  -1  -2   14.91    0.84
   9   1   2   14.51    0.95
  -1   9   2   11.91    0.87
  -9  -1   2   14.25    0.75
   9   1   2   13.60    0.81
  -9  -1   2   13.77    0.91
   1  -9   2   14.92    0.95
   9   1   2   14.80    0.89
   0   9  -2  235.59    7.74
   0  -9  -2  223.93    8.18
   9   0  -2  218.86    7.92
   0   9  -2  211.38    8.13
   0   9  -2  230.12    7.74
  -9   0  -2  231.64    8.09
   0  -9  -2  227.41    7.72
  -9   0  -2  227.81    8.05
   9   0  -2  218.46    8.16
  -9   0   2  229.43    8.21
   9   0   2  219.13    8.02
   0  -9   2  222.45    8.19
   0   9   2  232.88    7.74
   9   0   2  223.06    8.00
   0   9   2  239.43    8.23
   9   0   2  233.13    8.21
  -9   0   2  224.98    7.94
   1   9  -2   14.54    0.68
  -1  -9  -2   13.69    0.66
  -9   1  -2   13.26    0.83
   9  -1  -2   14.48    0.92
  -1  -9  -2   14.28    0.91
   1   9  -2   14.38    0.90
   9  -1  -2   13.56    0.76
  -9   1  -2   16.19    0.90
   1   9   2   14.14    0.68
   9  -1   2   15.09    0.85
  -9   1   2   15.21    0.96
  -1  -9   2   15.31    0.94
   1   9   2   14.57    0.93
  -9   1   2   14.55    0.78
   9  -1   2   14.35    0.91
  -1  -9   2   13.94    0.68
  -2  -9  -2   44.71    1.98
  -2  -9  -2   41.52    1.71
   2   9  -2   43.68    1.75
   9  -2  -2   41.90    1.95
  -9   2  -2   43.53    1.95
  -9   2  -2   42.93    1.91
   9  -2  -2   41.89    1.81
   2   9  -2   45.00    1.98
  -9   2   2   43.64    1.84
   2   9   2   48.22    2.07
   9  -2   2   45.59    1.98
  -2  -9   2   43.41    1.73
   2   9   2   44.86    1.76
  -9   2   2   43.28    2.04
   9  -2   2   45.30    1.94
  -2  -9   2   43.97    2.01
  -9   3  -2   26.39    1.32
  -3  -9  -2   28.49    1.38
   3   9  -2   27.34    1.37
   9  -3  -2   26.37    1.33
  -3  -9  -2   25.23    1.17
   3   9  -2   29.54    1.24
   9  -3  -2   26.37    1.24
  -9   3   2   23.77    1.24
  -3  -9   2   24.80    1.17
   9  -3   2   26.25    1.33
   9  -3   2   27.00    1.35
  -3  -9   2   26.33    1.39
   3   9   2   24.84    1.38
  -9   3   2   24.58    1.41
   3   9   2   25.94    1.20
   4   9  -2   43.07    2.16
   4   9  -2   50.93    2.11
  -9   4  -2   49.29    2.20
  -4  -9  -2   49.66    2.21
  -4  -9  -2   47.77    2.04
   9  -4  -2   50.50    2.17
  -9   4   2   54.13    2.39
   4   9   2   48.96    2.26
   9  -4   2   54.00    2.20
  -9   4   2   53.18    2.16
  -4  -9   2   51.64    2.07
   9  -4   2   52.25    2.28
   4   9   2   51.54    2.11
  -4  -9   2   53.27    2.30
  -9   5  -2   16.96    1.04
  -5  -9  -2   17.40    1.04
  -5  -9  -2   16.58    0.95
   9  -5  -2   17.95    0.99
   5   9  -2   17.30    1.00
   5   9  -2   18.26    1.06
   9  -5   2   17.40    1.09
  -5  -9   2   18.15    1.08
   9  -5   2   17.81    1.00
  -9   5   2   16.84    1.00
  -5  -9   2   16.27    1.07
   5   9   2   18.15    1.11
   5   9   2   16.62    0.98
   6   9  -2   71.74    2.98
  -9   6  -2   72.96    3.03
  -9   6  -2   66.84    2.81
   9  -6  -2   71.19    3.16
   6   9  -2   73.90    2.97
   9  -6  -2   74.54    2.87
  -6  -9  -2   70.70    2.98
   9  -6   2   71.53    2.86
  -9   6   2   74.10    2.98
  -9   6   2   72.25    2.85
  -6  -9   2   72.76    3.06
   6   9   2   69.54    3.03
   9  -6   2   72.64    3.09
   6   9   2   72.07    2.96
  -9   7  -2   24.46    1.20
   9  -7  -2   24.98    1.22
   7   9  -2   24.85    1.37
   7   9  -2   26.97    1.37
  -9   7  -2   27.24    1.61
  -7  -9  -2   24.03    1.33
   9  -7   2   24.74    1.43
  -9   7   2   22.61    1.19
  -9   7   2   25.38    1.36
  -7  -9   2   22.89    1.38
   9  -7   2   23.68    1.20
   7   9   2   23.93    1.36
  -8  -9  -2   23.55    1.33
  -8  -9  -2   21.48    1.26
  -9   8  -2   21.33    1.10
   9  -8  -2   21.13    1.42
   8   9  -2   22.03    1.32
  -9   8  -2   19.38    1.27
   9  -8  -2   21.44    1.09
   9  -8   2   23.50    1.12
   8   9   2   25.55    1.39
   9  -8   2   20.04    1.52
  -8  -9   2   22.96    1.37
  -9   8   2   24.12    1.13
  -9  -9  -2    5.75    0.64
  -9   9  -2    7.09    0.52
   9   9  -2    6.06    0.71
   9  -9  -2    4.90    0.78
   9  -9  -2    5.35    0.47
  -9  -9  -2    6.24    0.87
  -9   9  -2    7.13    0.75
  -9   9   2    6.64    0.57
   9  -9   2    5.33    0.47
   9   9   2    7.00    0.72
  -9  -9   2    6.38    0.62
  -9   9   2    7.27    0.71
   9  -9   2    4.37    0.71
  -9  -9   2    5.43    0.66
 -10  -9  -2   74.92    3.16
   9 -10  -2   72.88    2.75
   9 -10  -2   75.70    3.38
  -9  10  -2   72.02    3.21
  10   9  -2   74.76    3.26
 -10  -9  -2   73.73    3.11
  -9  10  -2   71.60    2.74
  -9  10   2   68.50    2.72
   9 -10   2   70.36    2.74
 -10  -9   2   72.99    3.05
   9 -10   2   74.16    3.30
  -9  10   2   70.28    3.18
  10   9   2   71.94    3.24
 -10  -9   2   69.54    3.19
  -8  10  -2   14.44    1.09
 -10  -8  -2   15.50    1.03
   8 -10  -2   12.88    0.69
  -8  10  -2   13.91    0.71
 -10  -8  -2   13.50    0.97
   8 -10  -2   13.95    1.15
  10   8  -2   13.70    1.09
   8 -10   2   14.64    0.71
  10   8   2   15.97    1.15
 -10  -8   2   13.98    0.92
  -8  10   2   15.47    1.09
  -8  10   2   15.20    0.72
   8 -10   2   14.35    1.09
 -10  -8   2   15.51    1.25
   7 -10  -2    9.72    0.90
  -7  10  -2    9.38    0.47
  10   7  -2    9.34    0.87
  -7  10  -2   11.35    0.90
 -10  -7  -2    9.20    0.76
   7 -10  -2    8.77    0.45
 -10  -7  -2    9.06    0.74
   7 -10  -2    9.20    0.46
   7 -10   2    8.17    0.79
 -10  -7   2    8.88    0.70
  10   7   2    8.86    0.83
 -10  -7   2    8.58    0.77
   7 -10   2    9.08    0.46
  -7  10   2    7.53    0.78
 -10  -6  -2    1.74    0.40
  10   6  -2    1.53    0.42
 -10  -6  -2    2.11    0.41
  -6  10  -2    1.43    0.39
   6 -10  -2    2.31    0.54
 -10  -6   2    1.84    0.36
   6 -10   2    1.14    0.40
  -6  10   2    1.37    0.37
  10   6   2    1.75    0.42
 -10  -6   2    1.90    0.44
  10   5  -2  156.16    5.95
 -10  -5  -2  150.45    5.72
 -10  -5  -2  156.21    5.76
   5 -10  -2  153.82    6.01
  -5  10  -2  147.09    5.86
  10   5   2  151.44    5.93
 -10  -5   2  159.45    5.90
   5 -10   2  159.71    6.00
 -10  -5   2  156.24    5.63
  -5  10   2  157.93    5.94
 -10  -5   2  152.45    5.58
 -10  -4  -2   26.39    1.38
 -10  -4  -2   28.87    1.43
  10   4  -2   28.75    1.77
  10   4   2   27.64    1.34
  -4  10   2   29.17    1.57
 -10  -4   2   30.29    1.34
  10   4   2   28.35    1.75
   4 -10   2   29.12    1.60
 -10  -4   2   25.80    1.46
 -10  -4   2   29.40    1.31
 -10  -3  -2   37.08    1.71
 -10  -3  -2   36.59    1.70
  -3  10  -2   35.22    1.81
  10   3  -2   35.62    1.85
   3 -10  -2   36.94    1.87
 -10  -3   2   37.78    1.83
  -3  10   2   38.75    1.86
   3 -10   2   36.78    1.85
 -10  -3   2   36.11    1.59
  10   3   2   37.47    1.89
  10   3   2   38.77    1.65
   2 -10  -2   24.46    1.39
 -10  -2  -2   25.53    1.28
  -2  10  -2   24.82    1.36
 -10  -2  -2   24.58    1.26
  10   2  -2   24.23    1.15
  10   2  -2   25.76    1.43
   2 -10   2   22.67    1.35
 -10  -2   2   26.26    1.17
  10   2   2   23.13    1.38
  -2  10   2   25.19    1.39
 -10  -2   2   24.87    1.37
  10   2   2   23.87    1.18
  10   1  -2   27.84    1.52
  -1  10  -2   29.55    1.53
  10   1  -2   29.60    1.31
   1 -10  -2   28.15    1.53
 -10  -1  -2   28.70    1.40
 -10  -1  -2   27.93    1.41
  10   1   2   30.43    1.37
 -10  -1   2   29.44    1.53
 -10  -1   2   29.16    1.31
  10   1   2   29.50    1.56
  -1  10   2   28.02    1.53
   1 -10   2   31.30    1.57
 -10   0  -2   -0.05    0.18
 -10   0  -2   -0.02    0.19
   0 -10  -2    0.19    0.09
   0  10  -2    0.31    0.21
   0  10  -2    0.07    0.09
  10   0  -2    0.25    0.18
   0 -10  -2   -0.18    0.16
   0  10  -2    0.21    0.10
  10   0  -2   -0.05    0.21
 -10   0   2    0.08    0.21
  10   0   2   -0.02    0.16
   0 -10   2    0.26    0.20
  10   0   2   -0.26    0.18
   0  10   2    0.24    0.10
   0  10   2   -0.01    0.19
 -10   0   2    0.16    0.16
  -1 -10  -2   30.12    1.51
   1  10  -2   26.87    1.45
  -1 -10  -2   27.46    1.13
 -10   1  -2   27.69    1.38
 -10   1  -2   29.18    1.44
   1  10  -2   29.75    1.17
  10  -1  -2   28.02    1.48
  10  -1  -2   28.15    1.30
  -1 -10   2   26.81    1.15
  10  -1   2   30.15    1.39
 -10   1   2   26.70    1.30
  -1 -10   2   29.85    1.52
   1  10   2   24.92    1.45
   1  10   2   29.33    1.17
  10  -1   2   27.72    1.47
 -10   1   2   29.77    1.54
 -10   2  -2   25.61    1.29
  10  -2  -2   25.14    1.35
   2  10  -2   23.17    1.32
  -2 -10  -2   23.75    1.07
 -10   2  -2   25.01    1.32
   2  10  -2   23.79    1.10
  -2 -10  -2   24.59    1.34
  10  -2  -2   23.70    1.19
  -2 -10   2   26.76    1.11
   2  10   2   26.00    1.41
 -10   2   2   22.37    1.36
  -2 -10   2   23.88    1.35
 -10   2   2   26.13    1.24
   2  10   2   24.85    1.11
  10  -2   2   26.07    1.37
  -3 -10  -2   37.99    1.81
  -3 -10  -2   38.64    1.58
   3  10  -2   35.83    1.59
  10  -3  -2   39.24    1.80
   3  10  -2   37.78    1.80
 -10   3  -2   37.43    1.75
   3  10   2   37.18    1.60
  -3 -10   2   37.53    1.84
 -10   3   2   37.71    1.69
   3  10   2   36.69    1.85
  10  -3   2   35.89    1.77
 -10   3   2   38.02    1.90
  -3 -10   2   35.84    1.57
 -10   4  -2   29.10    1.48
   4  10  -2   29.70    1.52
   4  10  -2   29.08    1.37
  -4 -10  -2   29.10    1.33
  -4 -10  -2   29.34    1.51
  10  -4  -2   27.63    1.45
 -10   4   2   27.69    1.59
  -4 -10   2   29.52    1.34
   4  10   2   29.31    1.38
   4  10   2   27.50    1.53
  -4 -10   2   31.71    1.59
  10  -4   2   27.36    1.51
  10  -4   2   27.12    1.45
 -10   4   2   30.16    1.44
 -10   5  -2  154.75    5.86
  -5 -10  -2  159.20    5.89
   5  10  -2  161.60    5.90
  10  -5  -2  153.86    5.77
   5  10  -2  162.57    5.78
  10  -5   2  152.04    5.93
   5  10   2  148.58    5.93
  10  -5   2  160.79    5.81
 -10   5   2  155.72    5.80
   5  10   2  154.38    5.75
  -5 -10   2  153.69    5.94
  10  -6  -2    1.65    0.35
   6  10  -2    1.56    0.37
   6  10  -2    1.89    0.41
 -10   6  -2    2.54    0.51
  -6 -10  -2    1.36    0.36
   6  10   2    1.51    0.37
  10  -6   2    1.82    0.39
   6  10   2    2.21    0.47
 -10   6   2    2.09    0.38
  10  -6   2    1.74    0.43
 -10   7  -2    8.96    0.80
   7  10  -2    8.83    0.77
  10  -7  -2    9.71    0.93
  -7 -10  -2    8.52    0.74
  10  -7  -2    9.70    0.69
   7  10  -2   10.13    0.79
  10  -7   2    8.77    0.85
   7  10   2   10.17    0.82
 -10   7   2    9.76    0.80
  10  -7   2    8.79    0.68
  -7 -10   2    9.69    0.83
  -8 -10  -2   16.57    1.09
  10  -8  -2   12.87    0.84
  10  -8  -2   13.69    1.14
   8  10  -2   14.74    1.01
  -8 -10  -2   15.25    1.03
 -10   8  -2   15.37    1.09
   8  10  -2   15.07    1.07
   8  10   2   13.81    1.05
  -8 -10   2   13.92    1.05
  10  -8   2   13.78    0.86
 -10   8   2   13.70    1.00
  10  -8   2   13.44    1.06
 -10   9  -2   72.82    3.25
  10  -9  -2   73.65    2.91
  -9 -10  -2   69.54    3.17
  -9 -10  -2   74.95    3.23
 -10   9  -2   69.62    2.88
  10  -9  -2   74.47    3.43
   9  10  -2   76.29    3.28
  10  -9   2   74.26    3.34
  -9 -10   2   80.08    3.18
  10  -9   2   75.07    2.92
  -9 -10   2   72.12    3.26
 -10   9   2   75.42    3.24
 -10   9   2   72.06    2.89
   9  10   2   77.17    3.30
 -10 -10  -2   10.80    0.89
 -10 -10  -2   12.41    0.95
 -10  10  -2   10.40    0.71
  10 -10  -2   10.84    0.70
  10  10  -2   10.21    1.00
  10 -10  -2   11.40    1.07
 -10  10  -2   10.18    0.97
  10  10   2   10.34    1.00
  10 -10   2   10.97    0.70
 -10 -10   2   10.78    0.96
 -10  10   2   11.55    0.96
 -10  10   2   10.42    0.71
  10 -10   2   11.24    1.03
 -10 -10   2   12.80    0.94
 -10  11  -2   16.85    0.90
 -10  11  -2   17.78    1.28
 -11 -10  -2   17.71    1.24
  10 -11  -2   17.56    0.90
  11  10  -2   18.68    1.36
 -11 -10  -2   17.81    1.22
  10 -11  -2   17.70    1.38
 -11 -10   2   18.97    1.34
  10 -11   2   18.67    1.33
 -10  11   2   15.79    0.88
  10 -11   2   16.62    0.89
  11  10   2   18.34    1.35
 -10  11   2   18.18    1.30
 -11  -9  -2   10.01    0.87
   9 -11  -2    9.79    1.01
 -11  -9  -2   10.35    0.99
  -9  11  -2   10.36    0.57
  11   9  -2    9.43    0.97
  -9  11  -2   10.01    0.95
   9 -11  -2    9.37    0.56
 -11  -9   2   11.05    0.83
  -9  11   2   10.97    0.98
   9 -11   2    9.58    0.56
 -11  -9   2    8.53    0.89
   9 -11   2    9.04    0.95
  11   9   2    8.91    0.92
   8 -11  -2    8.95    0.90
  -8  11  -2    7.84    0.45
   8 -11  -2    8.28    0.44
  11   8  -2    9.59    0.88
 -11  -8  -2    8.09    0.76
  -8  11  -2    8.54    0.85
 -11  -8  -2    8.20    0.83
   8 -11  -2    7.81    0.44
 -11  -8   2    9.74    0.88
  -8  11   2    9.86    0.91
   8 -11   2   10.29    0.47
   8 -11   2    9.44    0.93
 -11  -8   2    9.88    0.77
  11   8   2    9.22    0.90
 -11  -7  -2   16.81    1.07
 -11  -7  -2   17.91    1.12
  -7  11  -2   18.11    1.20
   7 -11  -2   18.21    1.31
  11   7  -2   15.55    1.21
   7 -11   2   15.23    1.17
  -7  11   2   16.02    1.16
 -11  -7   2   15.84    1.29
  11   7   2   15.63    1.20
 -11  -7   2   17.41    1.03
  -6  11  -2   23.28    1.46
 -11  -6  -2   26.87    1.40
  11   6  -2   24.97    1.54
 -11  -6  -2   25.09    1.39
   6 -11  -2   30.59    1.67
 -11  -6   2   24.88    1.28
  11   6   2   22.46    1.49
 -11  -6   2   25.02    1.47
   6 -11   2   25.48    1.55
  -6  11   2   25.00    1.50
   5 -11  -2   11.99    0.99
 -11  -5  -2   11.37    0.85
  11   5  -2   11.30    0.96
  -5  11  -2   12.59    0.98
 -11  -5  -2   11.34    0.83
  11   5   2   12.23    0.98
 -11  -5   2   12.72    0.79
  -5  11   2   11.70    0.93
 -11  -5   2   12.00    0.92
   5 -11   2   12.83    0.99
  11   4  -2   38.75    1.99
  -4  11  -2   39.68    1.93
   4 -11  -2   37.03    1.95
 -11  -4  -2   39.12    1.79
 -11  -4  -2   39.14    1.79
  -4  11   2   33.04    1.85
 -11  -4   2   34.90    1.84
   4 -11   2   36.83    1.92
 -11  -4   2   35.43    1.62
  11   4   2   36.28    1.94
 -11  -4   2   37.00    1.66
  -3  11  -2   37.35    1.89
 -11  -3  -2   35.41    1.72
 -11  -3  -2   33.32    1.70
  11   3  -2   35.41    1.90
   3 -11  -2   34.85    1.89
 -11  -3   2   37.56    1.86
  11   3   2   35.79    1.89
 -11  -3   2   40.09    1.65
   3 -11   2   37.52    1.90
  -3  11   2   39.36    1.92
 -11  -2  -2   14.79    0.96
  11   2  -2   16.56    1.15
 -11  -2  -2   16.48    0.99
  11   2  -2   15.23    0.89
  -2  11  -2   16.32    1.09
   2 -11  -2   17.82    1.17
 -11  -2   2   17.25    1.10
 -11  -2   2   16.38    0.90
  11   2   2   17.50    1.01
  -2  11   2   17.61    1.14
   2 -11   2   16.12    1.12
  11   2   2   16.86    1.13
 -11  -1  -2    9.85    0.71
  11   1  -2   10.22    0.96
 -11  -1   2    6.98    0.55
  11   1   2    7.04    0.98
   1 -11   2    6.70    0.68
  -1  11   2    6.88    0.69
 -11  -1   2    7.02    0.71
  11   1   2    6.68    0.62
   0 -11  -2  134.98    5.25
  11   0  -2  131.61    5.25
   0  11  -2  137.20    4.63
   0  11  -2  131.57    5.22
   0 -11  -2  129.75    4.61
  11   0  -2  130.39    4.91
 -11   0  -2  137.00    5.10
 -11   0  -2  142.56    5.08
   0  11  -2  137.65    4.63
 -11   0   2  135.93    4.94
   0  11   2  135.44    4.62
 -11   0   2  134.07    5.23
   0  11   2  128.59    5.23
   0 -11   2  131.81    5.24
  11   0   2  136.72    5.27
   1  11  -2    7.24    0.69
  -1 -11  -2    7.16    0.44
 -11   1  -2    6.99    0.65
  11  -1  -2    7.77    0.73
 -11   1  -2    7.49    0.64
   1  11  -2    7.26    0.46
  11  -1  -2    7.26    0.60
  -1 -11  -2    8.00    0.74
  11  -1   2   10.55    0.82
  -1 -11   2   10.13    0.50
   1  11   2   10.16    0.95
 -11   1   2    9.93    0.82
 -11   1   2   10.73    0.67
   1  11   2   10.14    0.51
  -1 -11   2    8.97    0.86
   2  11  -2   18.35    1.11
   2  11  -2   17.78    1.10
 -11   2  -2   17.04    1.01
  -2 -11  -2   16.37    1.07
  11  -2  -2   16.43    1.08
 -11   2  -2   18.18    1.08
  -2 -11  -2   15.95    0.79
  -2 -11   2   14.62    0.79
 -11   2   2   15.43    0.93
   2  11   2   14.66    1.22
   2  11   2   16.03    0.89
  -2 -11   2   15.53    1.08
 -11   2   2   13.86    1.06
  11  -2   2   16.41    1.08
   3  11  -2   39.08    1.61
 -11   3  -2   38.67    1.79
  11  -3  -2   38.97    1.85
   3  11  -2   37.38    1.86
  -3 -11  -2   37.79    1.84
 -11   3   2   36.25    1.70
  -3 -11   2   35.07    1.84
 -11   3   2   34.53    1.89
   3  11   2   35.59    1.58
   3  11   2   34.08    1.88
  11  -3   2   37.02    1.83
  11  -4  -2   35.75    1.79
  -4 -11  -2   33.67    1.59
  -4 -11  -2   37.99    1.86
 -11   4  -2   36.97    1.81
   4  11  -2   35.78    1.66
   4  11  -2   34.80    1.84
 -11   4   2   38.58    1.99
   4  11   2   35.48    1.65
   4  11   2   38.12    1.92
  -4 -11   2   35.78    1.61
  11  -4   2   40.08    1.85
 -11   4   2   38.07    1.76
  11  -4   2   37.53    1.88
  -4 -11   2   39.37    1.93
  -5 -11  -2   13.18    0.95
   5  11  -2   11.62    0.84
   5  11  -2   14.04    0.99
  11  -5  -2   14.05    0.92
 -11   5  -2   13.37    1.08
   5  11   2   12.19    0.85
  11  -5   2   12.87    0.90
  -5 -11   2   13.19    0.99
 -11   5   2   11.88    0.87
   5  11   2   12.61    0.98
  11  -5   2   11.70    0.94
   6  11  -2   26.66    1.41
  11  -6  -2   25.00    1.37
  11  -6  -2   26.56    1.61
   6  11  -2   25.04    1.45
 -11   6  -2   23.24    1.41
   6  11   2   27.49    1.56
   6  11   2   27.01    1.42
 -11   6   2   23.34    1.37
  11  -6   2   24.84    1.37
  -6 -11   2   26.55    1.53
  11  -6   2   28.33    1.58
  -7 -11  -2   15.88    1.12
  11  -7  -2   14.95    1.00
   7  11  -2   15.57    1.25
  11  -7  -2   16.86    1.28
 -11   7  -2   17.26    1.16
   7  11  -2   16.70    1.11
  11  -7   2   15.80    1.18
  -7 -11   2   18.91    1.23
   7  11   2   17.46    1.13
   7  11   2   16.21    1.17
 -11   7   2   17.82    1.14
  11  -7   2   17.80    1.05
  -8 -11  -2    9.77    0.89
  -8 -11  -2    8.72    0.81
   8  11  -2   10.62    0.89
  11  -8  -2    9.85    0.95
  11  -8  -2   10.19    0.75
   8  11  -2    9.75    0.95
 -11   8  -2   11.52    0.96
   8  11   2    9.50    0.85
 -11   8   2    7.21    0.77
  11  -8   2    8.59    0.87
  11  -8   2    7.63    0.70
  -8 -11   2    8.90    0.86
  11  -9  -2    8.89    0.71
 -11   9  -2   11.04    0.96
   9  11  -2   11.09    0.95
  -9 -11  -2   11.21    0.96
  11  -9  -2   10.11    1.02
  -9 -11  -2    9.60    0.88
   9  11   2    8.70    0.88
  11  -9   2    9.92    0.74
  -9 -11   2    9.75    0.92
 -11   9   2    7.95    0.84
  11  -9   2    8.51    0.91
  -9 -11   2    9.83    0.84
 -10 -11  -2   16.94    1.22
 -11  10  -2   17.67    1.25
  11 -10  -2   16.79    1.34
 -10 -11  -2   18.10    1.24
  11 -10  -2   18.29    1.00
  10  11  -2   17.85    1.31
  11 -10   2   17.95    1.37
  11 -10   2   17.25    0.98
  10  11   2   17.75    1.31
 -10 -11   2   15.36    1.23
 -11  10   2   16.86    1.23
 -10 -11   2   17.52    1.17
 -11  11  -2   21.77    1.13
  11 -11  -2   20.51    1.56
  11  11  -2   22.62    1.54
 -11 -11  -2   22.09    1.44
 -11  11  -2   20.53    1.48
 -11 -11  -2   21.89    1.43
  11 -11  -2   21.85    1.11
 -11 -11   2   24.14    1.43
  11 -11   2   23.71    1.13
 -11  11   2   22.38    1.13
  11  11   2   23.28    1.57
 -11 -11   2   22.99    1.53
 -11  11   2   21.18    1.46
  11 -11   2   19.12    1.47
 -11  12  -2    2.66    0.61
 -12 -11  -2    1.34    0.48
  11 -12  -2    1.24    0.30
  12  11  -2    1.63    0.60
  11 -12  -2    2.40    0.66
 -12 -11  -2    1.69    0.55
 -11  12  -2    1.23    0.53
 -12 -11   2    2.69    0.69
 -11  12   2    0.39    0.42
 -12 -11   2    1.65    0.49
  11 -12   2    1.48    0.30
  12  11   2    0.79    0.51
  11 -12   2    1.61    0.61
  10 -12  -2    0.82    0.25
 -10  12  -2    1.47    0.50
  10 -12  -2    0.78    0.51
 -12 -10  -2    1.51    0.49
  10 -12  -2    1.22    0.24
  12  10  -2    1.15    0.49
 -10  12  -2    1.00    0.29
 -12 -10  -2    1.32    0.45
  10 -12   2    1.48    0.52
  12  10   2    1.70    0.61
 -12 -10   2    1.67    0.52
  10 -12   2    1.71    0.27
 -12 -10   2    2.43    0.52
 -10  12   2    1.05    0.49
 -12  -9  -2   11.01    0.94
  -9  12  -2   10.85    1.03
 -12  -9  -2   10.93    0.94
  12   9  -2    9.85    1.04
  -9  12  -2   11.70    0.51
   9 -12  -2   11.06    1.12
  12   9   2    9.79    0.99
   9 -12   2   10.85    0.51
 -12  -9   2   13.32    0.95
 -12  -9   2   11.34    1.03
   9 -12   2   10.88    1.02
  -9  12   2   10.40    0.97
  12   8  -2   34.14    1.93
   8 -12  -2   33.84    1.95
 -12  -8  -2   34.34    1.76
  -8  12  -2   33.17    1.87
 -12  -8  -2   34.44    1.77
  12   8   2   29.53    1.87
  -8  12   2   29.06    1.79
 -12  -8   2   30.45    1.61
 -12  -8   2   29.56    1.79
   8 -12   2   30.43    1.86
  12   7  -2   20.51    1.45
 -12  -7  -2   21.80    1.47
   7 -12  -2   20.13    1.45
 -12  -7  -2   20.40    1.29
  -7  12  -2   20.25    1.39
   7 -12   2   21.53    1.47
  12   7   2   22.04    1.50
  -7  12   2   21.39    1.43
 -12  -7   2   23.40    1.24
 -12  -7   2   21.33    1.40
  12   6  -2   42.26    2.23
  -6  12  -2   43.14    2.18
   6 -12  -2   40.34    2.21
 -12  -6  -2   39.44    1.98
 -12  -6  -2   41.90    2.01
  12   6   2   46.13    2.31
 -12  -6   2   43.99    2.16
 -12  -6   2   41.38    1.89
  -6  12   2   39.93    2.14
   6 -12   2   39.68    2.17
  12   5  -2   18.67    1.33
 -12  -5  -2   20.95    1.20
   5 -12  -2   19.80    1.36
 -12  -5  -2   19.41    1.16
  -5  12  -2   21.40    1.33
  -5  12   2   21.67    1.34
   5 -12   2   16.75    1.23
 -12  -5   2   16.43    1.22
  12   5   2   16.85    1.26
 -12  -5   2   18.32    1.07
  12   4  -2   19.12    1.34
  -4  12  -2   19.09    1.31
 -12  -4  -2   21.59    1.23
 -12  -4  -2   19.76    1.19
   4 -12  -2   19.54    1.36
   4 -12   2   21.59    1.38
 -12  -4   2   21.06    1.32
 -12  -4   2   21.69    1.12
  12   4   2   21.44    1.41
  -4  12   2   21.21    1.35
  12   3  -2   18.92    1.28
   3 -12  -2   16.05    1.21
 -12  -3  -2   18.33    1.11
  -3  12  -2   16.92    1.19
 -12  -3  -2   17.07    1.10
  -3  12   2   19.03    1.26
 -12  -3   2   20.51    1.26
  12   3   2   19.00    1.28
 -12  -3   2   19.50    1.03
   3 -12   2   18.76    1.27
 -12  -2  -2  109.71    4.41
   2 -12  -2  114.37    4.62
  -2  12  -2  112.75    4.58
  12   2  -2  111.18    4.63
 -12  -2  -2  112.60    4.39
  12   2   2  116.36    4.65
 -12  -2   2  117.57    4.28
  -2  12   2  112.17    4.60
 -12  -2   2  111.21    4.55
   2 -12   2  117.24    4.63
   1 -12  -2    1.75    0.48
 -12  -1  -2    1.14    0.35
 -12  -1  -2    2.21    0.45
  12   1  -2    2.58    0.55
  -1  12  -2    1.69    0.45
  12   1   2    1.98    0.48
   1 -12   2    1.98    0.48
  -1  12   2    1.31    0.42
 -12  -1   2    2.46    0.40
 -12  -1   2    2.70    0.55
 -12   0  -2    6.90    0.66
 -12   0  -2    7.83    0.67
  12   0  -2    6.60    0.72
   0 -12  -2    7.43    0.73
   0  12  -2    8.22    0.74
   0  12   2    5.44    0.67
 -12   0   2    7.68    0.60
  12   0   2    6.35    0.69
   0 -12   2    7.07    0.75
 -12   0   2    6.95    0.72
  -1 -12  -2    2.00    0.24
   1  12  -2    1.55    0.44
   1  12  -2    1.84    0.25
  12  -1  -2    2.09    0.51
 -12   1  -2    2.08    0.44
 -12   1  -2    2.08    0.45
  -1 -12  -2    1.68    0.45
  -1 -12   2    1.82    0.45
   1  12   2    1.96    0.25
 -12   1   2    1.90    0.39
  12  -1   2    1.99    0.50
   1  12   2    1.52    0.43
 -12   1   2    1.77    0.46
  -2 -12  -2  111.37    4.54
  -2 -12  -2  107.95    4.08
 -12   2  -2  110.35    4.49
   2  12  -2  113.70    4.57
  12  -2  -2  111.89    4.55
 -12   2  -2  119.00    4.46
 -12   2   2  117.81    4.66
  -2 -12   2  108.89    4.11
  12  -2   2  116.83    4.59
 -12   2   2  118.84    4.37
  -2 -12   2  117.46    4.61
   2  12   2  115.45    4.63
  12  -3  -2   19.77    1.25
 -12   3  -2   19.74    1.17
  -3 -12  -2   18.15    1.18
  -3 -12  -2   18.54    1.02
   3  12  -2   20.00    0.98
   3  12  -2   18.13    1.20
   3  12   2   16.70    0.94
   3  12   2   16.83    1.20
  -3 -12   2   17.61    0.99
 -12   3   2   17.23    1.06
  -3 -12   2   19.80    1.26
  12  -3   2   19.95    1.24
  -4 -12  -2   19.26    1.04
  -4 -12  -2   20.71    1.28
   4  12  -2   19.91    1.28
 -12   4  -2   20.69    1.40
   4  12  -2   21.69    1.11
  -4 -12   2   19.01    1.05
   4  12   2   22.36    1.37
  12  -4   2   21.25    1.33
   4  12   2   20.73    1.10
 -12   4   2   18.36    1.33
 -12   4   2   21.54    1.22
  -4 -12   2   20.22    1.33
 -12   5  -2   19.15    1.21
   5  12  -2   18.08    1.09
  -5 -12  -2   18.00    1.21
   5  12  -2   20.55    1.27
  12  -5  -2   18.39    1.18
  12  -5   2   18.68    1.27
  12  -5   2   19.34    1.21
   5  12   2   18.96    1.11
   5  12   2   18.24    1.27
  -5 -12   2   19.55    1.29
 -12   5   2   20.74    1.19
   6  12  -2   41.73    1.98
   6  12  -2   43.40    2.12
 -12   6  -2   41.78    2.07
  12  -6  -2   43.54    2.03
  12  -6  -2   41.51    2.24
  -6 -12  -2   42.31    2.10
  12  -6   2   40.36    2.14
  12  -6   2   41.39    2.00
 -12   6   2   40.99    2.04
  -6 -12   2   40.57    2.13
   6  12   2   40.40    2.15
   6  12   2   40.69    1.96
   7  12  -2   20.29    1.28
 -12   7  -2   21.51    1.37
  12  -7  -2   22.89    1.52
  -7 -12  -2   22.64    1.38
  12  -7  -2   19.03    1.22
   7  12  -2   21.93    1.36
  12  -7   2   20.96    1.25
   7  12   2   20.90    1.39
  -7 -12   2   20.01    1.38
   7  12   2   21.92    1.31
 -12   7   2   21.92    1.34
  12  -7   2   20.35    1.41
   8  12  -2   29.32    1.70
   8  12  -2   30.75    1.75
  12  -8  -2   28.45    1.57
  12  -8  -2   31.01    1.92
  -8 -12  -2   31.26    1.76
 -12   8  -2   29.03    1.75
 -12   8   2   33.40    1.78
  12  -8   2   33.95    1.90
   8  12   2   35.15    1.81
  12  -8   2   35.49    1.66
  -8 -12   2   31.88    1.84
  -9 -12  -2   11.84    1.04
  12  -9  -2   10.21    1.06
   9  12  -2   10.92    1.02
  12  -9  -2   10.05    0.80
 -12   9  -2   10.79    0.98
  -9 -12  -2   12.00    1.01
 -12   9   2   11.13    0.98
  12  -9   2   12.54    1.09
  12  -9   2   11.17    0.82
   9  12   2   12.24    1.04
  -9 -12   2   10.45    0.99
 -10 -12  -2    1.65    0.44
 -12  10  -2    2.69    0.60
  12 -10  -2    1.53    0.52
  12 -10  -2    1.30    0.38
  10  12  -2    0.87    0.48
 -10 -12  -2    1.19    0.48
  12 -10   2    1.75    0.54
 -10 -12   2    1.22    0.51
  10  12   2    1.13    0.51
 -12  10   2    1.24    0.42
  12 -10   2    1.31    0.36
 -10 -12   2    1.84    0.49
  12 -11  -2    1.99    0.67
 -12  11  -2    1.39    0.55
 -11 -12  -2    1.42    0.54
  11  12  -2    2.73    0.65
  12 -11  -2    1.75    0.40
 -11 -12  -2    1.32    0.49
  12 -11   2    1.14    0.37
 -11 -12   2    1.25    0.51
 -12  11   2    1.37    0.53
  11  12   2    1.72    0.57
  12 -11   2    1.40    0.60
 -11 -12   2    0.92    0.47
 -12 -12  -2   22.27    1.51
  12  12  -2   19.98    1.54
 -12  12  -2   16.63    1.66
 -12 -12  -2   21.65    1.50
  12 -12  -2   22.43    1.70
  12 -12  -2   21.91    1.12
  12  12   2   22.93    1.62
  12 -12   2   22.68    1.13
 -12  12   2   22.39    1.57
 -12 -12   2   20.98    1.56
 -12 -12   2   20.05    1.39
  12 -12   2   23.02    1.63
  12 -13  -2    1.22    0.60
 -13 -12  -2    1.34    0.56
 -12  13  -2    2.19    0.66
  12 -13  -2    1.80    0.34
 -13 -12  -2    2.18    0.62
 -13 -12   2    2.01    0.64
 -12  13   2    1.18    0.57
  12 -13   2    1.91    0.59
  12 -13   2    1.91    0.34
 -13 -12   2    1.62    0.59
 -13 -11  -2   10.48    1.04
 -11  13  -2    9.70    1.04
  11 -13  -2    9.18    1.11
 -13 -11  -2   12.05    1.03
  11 -13  -2   10.54    0.66
  13  11  -2   12.35    1.24
 -13 -11   2   10.65    1.10
  13  11   2   10.56    1.19
 -13 -11   2   11.91    1.02
  11 -13   2   11.62    0.69
 -13 -10  -2    4.70    0.80
 -13 -10  -2    6.43    0.87
 -10  13  -2    5.26    0.95
  10 -13  -2    5.76    1.16
  13  10  -2    5.06    0.89
 -10  13   2    8.09    1.08
 -13 -10   2    7.15    0.89
  10 -13   2    7.06    1.02
 -13 -10   2    8.43    0.95
  13  10   2    6.17    1.02
 -13  -9  -2    7.33    0.81
  -9  13  -2    7.56    0.88
 -13  -9  -2    6.33    0.80
   9 -13  -2    7.02    1.06
  13   9  -2    6.14    0.96
  13   9   2    6.50    0.99
 -13  -9   2    6.80    0.86
  -9  13   2    8.33    0.93
 -13  -9   2    7.18    1.28
   9 -13   2    7.05    1.02
  -8  13  -2    1.46    0.50
 -13  -8  -2    1.52    0.46
   8 -13  -2    2.06    0.54
  13   8  -2    1.86    0.59
 -13  -8  -2    2.33    0.56
 -13  -8   2    2.34    0.50
  -8  13   2    1.50    0.48
  13   8   2    1.86    0.60
   8 -13   2    2.52    0.64
 -13  -8   2    2.60    0.63
  13   7  -2   22.18    1.61
  -7  13  -2   26.00    1.63
 -13  -7  -2   23.92    1.46
 -13  -7  -2   26.97    1.51
  13   7   2   25.07    1.66
  -7  13   2   22.95    1.55
 -13  -7   2   25.94    1.38
 -13  -7   2   25.47    1.59
   7 -13   2   24.12    1.61
  13   6  -2   13.24    1.18
   6 -13  -2   15.42    1.21
  -6  13  -2   14.91    1.15
 -13  -6  -2   15.64    1.07
 -13  -6  -2   14.42    1.06
  13   6   2   12.90    1.18
  -6  13   2   14.50    1.16
 -13  -6   2   14.03    0.95
   6 -13   2   14.54    1.17
 -13  -6   2   13.51    1.11
   5 -13  -2    3.55    0.70
  -5  13  -2    4.89    0.79
  13   5  -2    4.62    0.80
 -13  -5  -2    5.82    0.83
 -13  -5  -2    4.81    0.69
  -5  13   2    4.46    0.75
   5 -13   2    2.92    0.61
 -13  -5   2    4.53    0.51
  13   5   2    4.01    0.73
 -13  -5   2    4.26    0.70
   4 -13  -2    4.89    0.81
 -13  -4  -2    4.39    0.65
  -4  13  -2    4.39    0.73
  13   4  -2    4.62    0.81
 -13  -4  -2    5.32    0.69
   4 -13   2    4.28    0.73
  -4  13   2    5.40    0.81
 -13  -4   2    4.76    0.53
 -13  -4   2    5.19    0.76
  13   4   2    5.63    0.85
  -3  13  -2   24.51    1.54
 -13  -3  -2   26.08    1.42
   3 -13  -2   26.53    1.61
  13   3  -2   25.67    1.63
 -13  -3  -2   25.73    1.44
   3 -13   2   27.18    1.62
  13   3   2   25.42    1.61
  -3  13   2   25.16    1.57
 -13  -3   2   25.46    1.31
 -13  -2  -2    2.13    0.49
 -13  -2  -2    2.83    0.51
  13   2  -2    2.17    0.55
  -2  13  -2    1.67    0.50
   2 -13  -2    2.79    0.62
  -2  13   2    2.79    0.57
 -13  -2   2    2.62    0.45
  13   2   2    2.74    0.61
   2 -13   2    2.47    0.53
   1 -13  -2   12.43    1.00
  -1  13  -2   12.30    0.99
 -13  -1  -2   13.45    0.91
  13   1  -2   13.36    1.05
 -13  -1  -2   12.31    0.93
   1 -13   2   12.07    1.00
 -13  -1   2   11.77    1.40
  -1  13   2   11.96    0.99
 -13  -1   2   11.18    0.79
  13   1   2   11.74    1.01
   0 -13  -2   11.18    0.94
 -13   0  -2   11.09    0.88
  13   0  -2   10.75    0.96
   0  13  -2   10.23    0.94
 -13   0  -2   12.45    0.88
  13   0   2   11.65    0.98
 -13   0   2   10.88    0.76
   0  13   2    9.67    0.92
   0 -13   2   12.61    0.99
  13  -1  -2   13.44    1.04
   1  13  -2   12.39    0.59
 -13   1  -2   12.29    0.93
   1  13  -2   12.29    0.97
 -13   1  -2   11.35    0.89
  -1 -13  -2   11.00    0.56
   1  13  -2   11.73    0.59
  -1 -13  -2   12.73    1.00
   1  13   2   12.89    1.04
  -1 -13   2   12.60    0.99
  13  -1   2   13.10    1.06
 -13   1   2   12.54    1.02
   1  13   2   12.56    0.59
 -13   1   2   11.09    0.81
   2  13  -2    2.13    0.42
  -2 -13  -2    2.24    0.50
  -2 -13  -2    3.30    0.36
 -13   2  -2    2.10    0.49
  13  -2  -2    2.99    0.63
   2  13  -2    2.54    0.58
  13  -2   2    2.31    0.52
   2  13   2    3.11    0.62
  -2 -13   2    2.58    0.35
 -13   2   2    2.60    0.58
  -2 -13   2    3.21    0.60
   2  13   2    2.57    0.37
 -13   2   2    2.73    0.48
 -13   3  -2   25.39    1.44
  13  -3  -2   23.32    1.48
  -3 -13  -2   25.59    1.51
  -3 -13  -2   22.65    1.19
   3  13  -2   24.45    1.53
   3  13  -2   25.72    1.22
  13  -3   2   24.04    1.50
 -13   3   2   25.24    1.58
 -13   3   2   27.61    1.41
   3  13   2   25.97    1.22
   3  13   2   24.69    1.54
  -3 -13   2   26.15    1.55
  -3 -13   2   24.10    1.18
   4  13  -2    4.30    0.55
  -4 -13  -2    4.39    0.52
 -13   4  -2    5.49    0.64
   4  13  -2    4.99    0.77
  -4 -13  -2    4.24    0.65
  13  -4  -2    4.40    0.66
 -13   4   2    5.26    0.83
   4  13   2    6.04    0.86
   4  13   2    4.29    0.50
  -4 -13   2    3.73    0.51
 -13   4   2    4.70    0.66
  -4 -13   2    5.43    0.82
  13  -4   2    4.29    0.68
  13  -4   2    3.30    0.71
  13  -5  -2    3.76    0.65
   5  13  -2    4.25    0.60
  -5 -13  -2    4.36    0.69
   5  13  -2    3.00    0.56
 -13   5  -2    4.24    0.67
 -13   5   2    5.23    0.70
  13  -5   2    3.92    0.67
   5  13   2    4.57    0.76
   5  13   2    5.05    0.57
  -5 -13   2    5.30    0.79
  13  -5   2    3.95    0.68
   6  13  -2   14.21    1.09
 -13   6  -2   14.17    1.10
  13  -6  -2   13.54    1.03
   6  13  -2   14.75    1.00
  -6 -13  -2   13.82    1.08
  13  -6  -2   13.11    1.16
   6  13   2   15.07    1.01
   6  13   2   16.20    1.21
  13  -6   2   15.14    1.09
  -6 -13   2   17.26    1.22
 -13   6   2   14.93    1.05
  13  -6   2   13.52    1.12
  13  -7  -2   24.44    1.65
  13  -7  -2   24.34    1.42
   7  13  -2   22.50    1.48
 -13   7  -2   22.86    1.46
   7  13  -2   23.54    1.42
  -7 -13  -2   25.82    1.54
   7  13   2   25.11    1.59
 -13   7   2   25.28    1.48
  -7 -13   2   24.63    1.59
  13  -7   2   25.37    1.44
   7  13   2   24.55    1.44
  13  -7   2   25.23    1.60
  13  -8  -2    2.70    0.61
 -13   8  -2    2.23    0.55
   8  13  -2    2.80    0.61
   8  13  -2    2.67    0.58
  -8 -13  -2    2.23    0.56
  -8 -13   2    2.16    0.55
  13  -8   2    1.88    0.55
   8  13   2    2.18    0.60
 -13   8   2    2.30    0.53
   8  13   2    2.60    0.56
  -9 -13  -2    6.79    0.80
  13  -9  -2    6.64    1.00
 -13   9  -2    6.95    0.95
  13  -9  -2    6.33    0.69
  -9 -13  -2    7.50    0.85
   9  13  -2    6.86    0.93
   9  13   2    7.32    0.95
  13  -9   2    7.29    1.00
 -13   9   2    5.47    0.84
  -9 -13   2    7.62    0.83
  13  -9   2    5.98    0.68
 -10 -13  -2    6.32    0.91
  10  13  -2    6.55    0.94
  13 -10  -2    6.54    1.07
  13 -10  -2    7.55    0.70
 -13  10  -2    7.68    1.01
 -10 -13  -2    7.79    1.04
  13 -10   2    5.34    0.66
  10  13   2    6.62    0.94
 -10 -13   2    5.43    0.86
 -10 -13   2    6.47    0.87
  13 -10   2    5.66    0.89
 -13  10   2    5.86    0.90
  11  13  -2   13.65    1.18
 -11 -13  -2   11.52    1.09
  13 -11  -2    9.33    1.84
  13 -11  -2   11.48    0.85
 -11 -13  -2   11.82    1.10
 -11 -13   2   10.80    1.04
  11  13   2   12.52    1.15
  13 -11   2   13.07    1.24
  13 -11   2   11.72    0.87
 -11 -13   2   11.08    1.12
 -13  11   2   13.04    1.18
 -12 -13  -2    3.33    0.68
  13 -12  -2    2.39    0.71
 -13  12  -2    2.45    0.70
  13 -12  -2    1.28    0.41
 -12 -13  -2    2.11    0.66
  12  13  -2    1.29    0.67
 -12 -13   2    2.59    0.73
  12  13   2    1.10    0.65
 -12 -13   2    1.65    0.52
 -13  12   2    1.99    0.63
  13 -12   2    0.98    0.54
  13 -12   2    2.03    0.43
 -13  13  -2    1.62    0.55
  13  13  -2    2.29    0.80
  13 -13  -2    1.87    0.75
 -13 -13  -2    1.92    0.66
 -13 -13  -2    1.71    0.57
 -13  13   2    2.91    0.80
 -13 -13   2    2.81    0.65
  13 -13   2    1.11    0.57
  13  13   2    1.61    0.70
  13 -14  -2   16.62    1.55
 -13  14  -2   16.48    1.49
  14  13  -2   19.32    1.62
 -14 -13  -2   15.83    1.40
 -14 -13  -2   17.09    1.60
 -13  14   2   16.90    1.47
 -14 -13   2   17.22    1.52
  14  13   2   17.31    1.55
 -14 -13   2   19.37    1.39
  13 -14   2   18.11    1.54
 -12  14  -2    3.33    0.82
  12 -14  -2    4.03    0.86
  14  12  -2    4.07    0.92
 -14 -12  -2    3.87    0.76
 -14 -12  -2    4.81    0.89
  12 -14   2    3.19    0.78
 -12  14   2    3.71    0.81
 -14 -12   2    5.27    0.95
  14  12   2    4.82    0.98
 -14 -12   2    4.98    0.80
 -14 -11  -2   14.17    1.19
 -14 -11  -2   11.37    1.15
  14  11  -2   13.07    1.34
  11 -14  -2   13.85    1.32
 -11  14  -2   13.20    1.25
 -14 -11   2   14.39    1.32
  14  11   2   16.48    1.47
 -11  14   2   15.45    1.34
  11 -14   2   15.74    1.41
 -14 -11   2   13.59    1.12
 -14 -10  -2    2.32    0.60
 -10  14  -2    3.24    0.67
 -14 -10  -2    2.90    0.65
  10 -14  -2    1.94    0.69
  14  10  -2    2.94    0.83
 -14 -10   2    3.10    0.73
  14  10   2    3.14    0.78
 -14 -10   2    3.65    0.62
  10 -14   2    2.35    0.70
 -10  14   2    2.87    0.60
  -9  14  -2   38.93    2.22
 -14  -9  -2   34.47    1.98
  14   9  -2   39.04    2.53
 -14  -9  -2   38.63    2.05
   9 -14  -2   37.84    2.26
  14   9   2   35.66    2.46
 -14  -9   2   39.98    1.95
 -14  -9   2   32.96    2.08
 -14  -8  -2    7.55    0.80
   8 -14  -2    7.73    1.06
  14   8  -2    6.57    1.02
  -8  14  -2    5.98    0.90
 -14  -8  -2    5.97    0.76
  14   8   2    6.61    1.00
  -8  14   2    7.80    1.08
   8 -14   2    8.01    1.10
 -14  -8   2    7.51    1.04
 -14  -7  -2    0.47    0.36
  14   7  -2    0.25    0.45
 -14  -7  -2    0.30    0.38
   7 -14  -2    0.94    0.51
  -7  14  -2    1.81    0.52
 -14  -7   2    0.32    0.33
   7 -14   2    1.51    0.48
  -7  14   2    0.13    0.39
  14   7   2   -0.08    0.42
 -14  -7   2    0.36    0.34
   6 -14  -2    3.09    0.66
  14   6  -2    4.42    0.85
 -14  -6  -2    3.58    0.73
  -6  14  -2    3.98    0.73
 -14  -6  -2    4.43    0.68
 -14  -6   2    3.53    0.57
 -14  -6   2    4.40    0.75
   6 -14   2    3.34    0.72
  -6  14   2    2.89    0.64
  14   6   2    2.80    0.64
   5 -14  -2   27.30    1.76
  14   5  -2   24.27    1.72
  -5  14  -2   28.91    1.75
 -14  -5  -2   28.28    1.57
 -14  -5  -2   25.28    1.55
 -14  -5   2   29.26    1.73
  -5  14   2   27.66    1.75
 -14  -5   2   30.27    1.48
  14   5   2   28.47    1.82
   5 -14   2   29.39    1.80
 -14  -4  -2   15.35    1.09
 -14  -4  -2   17.63    1.11
   4 -14  -2   17.18    1.32
  14   4  -2   14.74    1.22
  -4  14  -2   14.90    1.22
   4 -14   2   15.01    1.18
 -14  -4   2   13.86    1.13
  14   4   2   14.80    1.23
 -14  -4   2   13.85    0.95
  -4  14   2   12.75    1.12
 -14  -3  -2    6.53    0.72
  14   3  -2    5.69    0.88
 -14  -3  -2    6.23    0.67
  -3  14  -2    6.02    0.87
   3 -14  -2    6.41    0.94
 -14  -3   2    5.47    0.81
  -3  14   2    5.85    0.88
  14   3   2    5.93    0.90
 -14  -3   2    5.76    0.60
   3 -14   2    5.82    0.73
   2 -14  -2    3.25    0.65
  14   2  -2    3.31    0.70
 -14  -2  -2    3.57    0.62
 -14  -2  -2    3.54    0.68
  -2  14  -2    2.78    0.63
 -14  -2   2    3.27    0.51
   2 -14   2    2.46    0.58
  -2  14   2    2.26    0.57
  14   2   2    2.74    0.61
 -14  -2   2    2.78    0.56
   1 -14  -2   60.62    2.85
 -14  -1  -2   59.62    2.68
 -14  -1  -2   61.92    2.84
  -1  14  -2   60.09    2.83
  14   1  -2   61.81    2.90
 -14  -1   2   54.67    2.76
  -1  14   2   56.26    2.81
   1 -14   2   58.32    2.83
  14   1   2   61.42    2.90
 -14  -1   2   56.02    2.48
 -14   0  -2    7.83    0.78
 -14   0  -2    8.03    0.74
  14   0  -2    8.11    0.86
   0  14  -2    7.68    0.82
   0 -14  -2    9.04    0.86
  14   0   2    7.24    0.83
   0 -14   2    8.07    0.84
 -14   0   2    7.92    0.86
   0  14   2    7.44    0.82
 -14   0   2    8.87    0.69
  14  -1  -2   58.92    2.81
  -1 -14  -2   53.03    2.08
   1  14  -2   57.86    2.78
  -1 -14  -2   56.52    2.76
 -14   1  -2   58.66    2.69
 -14   1  -2   55.45    2.58
   1  14  -2   57.51    2.09
  14  -1   2   62.22    2.87
  -1 -14   2   63.76    2.86
   1  14   2   58.12    2.82
 -14   1   2   60.57    2.84
 -14   1   2   62.19    2.55
  -2 -14  -2    2.12    0.55
 -14   2  -2    3.28    0.61
   2  14  -2    2.22    0.31
 -14   2  -2    2.57    0.51
   2  14  -2    2.62    0.58
  -2 -14  -2    2.29    0.30
  14  -2  -2    2.39    0.56
 -14   2   2    2.17    0.57
   2  14   2    2.78    0.60
  14  -2   2    2.34    0.51
  -2 -14   2    3.47    0.67
   2  14   2    2.84    0.33
 -14   2   2    2.87    0.50
  -3 -14  -2    6.84    0.64
   3  14  -2    6.70    0.91
  -3 -14  -2    6.08    0.74
   3  14  -2    5.41    0.53
  14  -3  -2    6.91    0.79
 -14   3  -2    6.14    0.70
  14  -3   2    6.96    0.80
  -3 -14   2    6.93    0.63
 -14   3   2    6.87    0.68
 -14   3   2    7.03    1.00
   3  14   2    7.23    0.58
  -3 -14   2    7.43    0.82
   3  14   2    7.52    0.82
  -4 -14  -2   15.25    1.17
   4  14  -2   14.33    0.91
 -14   4  -2   14.92    1.10
   4  14  -2   12.57    1.09
  -4 -14  -2   13.19    0.87
  14  -4  -2   13.52    1.10
  -4 -14   2   13.59    0.90
   4  14   2   14.70    0.92
   4  14   2   15.72    1.21
 -14   4   2   15.48    1.04
 -14   4   2   17.30    1.25
  -4 -14   2   16.61    1.21
  14  -4   2   15.04    1.16
  14  -4   2   15.96    1.20
  14  -5  -2   28.42    1.67
   5  14  -2   28.47    1.49
   5  14  -2   29.45    1.73
  -5 -14  -2   31.37    1.76
 -14   5  -2   28.46    1.65
  14  -5   2   30.15    1.72
  -5 -14   2   29.29    1.76
 -14   5   2   28.46    1.60
   5  14   2   27.80    1.77
   5  14   2   26.66    1.46
  14  -5   2   29.71    1.76
   6  14  -2    2.31    0.53
 -14   6  -2    3.54    0.67
   6  14  -2    2.08    0.55
  14  -6  -2    3.64    0.67
  -6 -14  -2    3.45    0.68
  14  -6  -2    3.23    0.69
   6  14   2    3.95    0.76
  -6 -14   2    3.10    0.66
  14  -6   2    3.94    0.67
   6  14   2    4.67    0.65
  14  -6   2    4.02    0.72
 -14   6   2    4.00    0.65
  -7 -14  -2    0.07    0.34
  14  -7  -2    0.11    0.41
   7  14  -2    0.53    0.38
 -14   7  -2    0.75    0.42
  14  -7  -2    1.22    0.44
   7  14   2    0.22    0.31
  -7 -14   2    0.39    0.43
  14  -7   2    0.37    0.38
 -14   7   2    0.64    0.42
  14  -7   2    0.80    0.45
   8  14  -2    7.38    0.87
  14  -8  -2    6.56    0.75
   8  14  -2    7.75    0.96
  14  -8  -2    7.83    1.12
  -8 -14  -2    8.01    0.90
 -14   8  -2    7.39    0.88
  -8 -14   2    6.88    0.99
  14  -8   2    6.25    0.73
   8  14   2    6.73    0.91
   8  14   2    5.36    0.90
  14  -8   2    8.16    0.93
 -14   8   2    7.85    0.85
   9  14  -2   35.60    2.07
  -9 -14  -2   37.44    2.14
 -14   9  -2   38.84    2.13
   9  14  -2   36.34    2.03
  14  -9  -2   35.99    2.26
  14  -9  -2   37.93    1.91
  -9 -14  -2   37.41    2.08
  -9 -14   2   37.08    2.16
  14  -9   2   36.01    2.17
  14  -9   2   39.59    1.94
 -14   9   2   39.33    2.11
   9  14   2   37.22    2.06
  14 -10  -2    3.83    0.62
 -10 -14  -2    3.56    0.72
  10  14  -2    2.39    0.69
 -14  10  -2    2.86    0.73
 -10 -14  -2    3.18    0.77
 -10 -14   2    2.62    0.64
  10  14   2    2.52    0.67
 -14  10   2    2.77    0.64
  14 -10   2    3.55    0.73
  14 -10   2    1.98    0.50
 -10 -14   2    1.96    0.62
  14 -11  -2   14.75    1.42
  11  14  -2   13.35    1.26
 -11 -14  -2   13.92    1.25
 -14  11  -2   13.14    1.20
  14 -11  -2   14.34    1.01
 -11 -14  -2   14.40    1.30
  14 -11   2   14.32    1.54
 -11 -14   2   12.93    1.39
 -11 -14   2   12.52    1.16
  11  14   2   14.95    1.31
  14 -11   2   11.96    0.97
 -12 -14  -2    3.11    0.75
  14 -12  -2    4.61    0.93
  12  14  -2    3.49    0.93
 -14  12  -2    2.26    0.68
  14 -12  -2    3.54    0.59
 -12 -14  -2    3.39    0.80
 -12 -14   2    4.24    0.83
  12  14   2    4.00    0.95
  14 -12   2    3.96    0.80
  14 -12   2    3.68    0.59
 -14  12   2    3.55    0.83
 -12 -14   2    3.51    0.81
  14 -13  -2   16.49    1.51
 -13 -14  -2   15.88    1.39
  13  14  -2   19.37    1.56
 -14  13  -2   18.40    1.47
 -13 -14  -2   18.98    1.53
 -13 -14   2   17.46    1.36
 -13 -14   2   16.30    1.49
 -14  13   2   16.91    1.50
  13  14   2   17.23    1.51
 -15 -12  -2    1.77    0.65
 -15 -12  -2    2.37    0.71
 -12  15  -2    1.76    0.67
  15  12  -2    2.13    0.73
  12 -15  -2    1.46    0.63
 -15 -12   2    2.99    0.79
  12 -15   2    1.91    0.64
  15  12   2    2.37    0.78
 -12  15   2    1.60    0.60
 -15 -12   2    2.69    0.69
 -15 -11  -2    3.15    0.73
 -15 -11  -2    2.97    0.70
 -11  15  -2    3.17    0.79
  11 -15  -2    2.65    0.77
  15  11  -2    1.75    0.75
 -15 -11   2    4.16    0.77
  11 -15   2    3.02    0.76
 -11  15   2    2.78    0.78
  15  11   2    1.50    0.66
 -15 -11   2    4.20    0.93
 -15 -10  -2    9.29    0.99
 -15 -10  -2   10.21    1.01
  10 -15  -2    9.29    1.14
  15  10  -2   10.30    1.33
 -10  15  -2   10.39    1.10
 -10  15   2    8.64    1.05
  15  10   2    8.41    1.26
  10 -15   2    9.54    1.11
 -15 -10   2    8.29    1.20
 -15 -10   2    9.44    0.93
  15   9  -2    1.61    0.60
 -15  -9  -2    3.02    0.64
  -9  15  -2    2.02    0.61
   9 -15  -2    2.52    0.70
 -15  -9  -2    1.64    0.54
  -9  15   2    1.77    0.59
 -15  -9   2    3.15    0.73
  15   9   2    1.66    0.60
   9 -15   2    2.18    0.66
 -15  -9   2    2.65    0.57
  -8  15  -2    7.38    0.89
 -15  -8  -2    7.70    0.89
  15   8  -2    6.73    1.10
 -15  -8  -2    6.57    0.82
   8 -15  -2    7.53    1.08
  15   8   2    5.68    1.02
 -15  -8   2    6.95    1.04
   8 -15   2    5.95    0.95
 -15  -8   2    7.52    0.78
  -8  15   2    8.11    0.95
  -7  15  -2    8.03    0.92
  15   7  -2    5.94    0.97
   7 -15  -2    6.96    1.02
 -15  -7  -2    6.22    0.89
 -15  -7  -2    6.85    0.79
  -7  15   2    6.41    1.16
  15   7   2    6.10    1.19
   7 -15   2    7.73    1.28
 -15  -7   2    6.25    0.97
  -6  15  -2   24.81    1.97
  15   6  -2   26.72    1.91
 -15  -6  -2   28.40    1.66
   6 -15  -2   30.26    2.19
 -15  -6  -2   26.96    1.62
  -6  15   2   26.55    1.79
 -15  -6   2   29.63    1.81
 -15  -6   2   30.57    1.55
  15   6   2   28.12    1.91
   6 -15   2   29.95    1.91
 -15  -5  -2    6.06    0.69
  -5  15  -2    4.13    0.77
   5 -15  -2    4.19    0.79
 -15  -5  -2    5.01    0.76
  15   5  -2    4.79    0.87
   5 -15   2    4.92    0.88
  15   5   2    4.22    0.81
 -15  -5   2    4.39    0.79
 -15  -5   2    5.23    0.60
  -5  15   2    4.18    0.83
   4 -15  -2   44.47    2.45
  15   4  -2   43.27    2.46
 -15  -4  -2   46.15    2.21
  -4  15  -2   42.41    2.37
 -15  -4   2   45.91    2.06
  15   4   2   39.58    2.40
  -4  15   2   44.10    2.43
   4 -15   2   46.43    2.45
 -15  -4   2   47.11    2.40
   3 -15  -2    2.99    0.68
 -15  -3  -2    3.03    0.59
 -15  -3  -2    2.49    0.60
  15   3  -2    2.91    0.72
  -3  15  -2    2.85    0.70
  -3  15   2    2.26    0.59
 -15  -3   2    3.28    0.51
   3 -15   2    1.91    0.51
  15   3   2    1.26    0.53
 -15  -3   2    1.10    0.46
 -15  -2  -2    2.96    0.61
  -2  15  -2    3.06    0.70
  15   2  -2    2.22    0.62
   2 -15  -2    2.59    0.65
 -15  -2  -2    3.50    0.59
  15   2   2    1.84    0.57
   2 -15   2    2.99    0.66
 -15  -2   2    2.90    0.67
  -2  15   2    2.54    0.63
 -15  -2   2    2.28    0.49
  15   1  -2    4.70    0.89
   1 -15  -2    5.69    0.87
 -15  -1  -2    4.47    0.84
  -1  15  -2    4.56    0.81
 -15  -1  -2    4.75    0.68
  -1  15   2    4.27    0.80
   1 -15   2    6.42    0.78
 -15  -1   2    5.05    0.67
 -15  -1   2    4.62    0.78
  15   1   2    6.76    1.03
   0 -15  -2   34.80    2.01
  15   0  -2   34.15    2.03
   0  15  -2   34.30    1.98
 -15   0  -2   35.93    1.82
   0 -15   2   33.90    2.00
 -15   0   2   33.11    1.96
  15   0   2   33.60    2.02
   0  15   2   36.50    2.06
 -15   0   2   34.74    1.70
  -1 -15  -2    4.00    0.69
   1  15  -2    5.58    0.85
  15  -1  -2    6.00    0.95
 -15   1  -2    4.98    0.75
 -15   1  -2    6.03    0.69
   1  15   2    5.60    0.87
 -15   1   2    5.54    0.70
  -1 -15   2    4.93    0.84
  15  -1   2    4.50    0.82
 -15   1   2    4.92    0.84
 -15   2  -2    1.76    0.51
  -2 -15  -2    3.12    0.63
  15  -2  -2    2.40    0.56
   2  15  -2    2.82    0.65
   2  15  -2    2.77    0.31
  -2 -15  -2    2.04    0.29
   2  15  -2    3.16    0.36
 -15   2  -2    2.91    0.60
  15  -2   2    1.88    0.54
 -15   2   2    2.67    0.65
   2  15   2    2.54    0.68
  -2 -15   2    2.57    0.63
 -15   2   2    2.46    0.60
   2  15   2    2.97    0.34
   3  15  -2    2.29    0.57
  -3 -15  -2    2.42    0.54
  15  -3  -2    1.45    0.53
   3  15  -2    2.22    0.37
 -15   3  -2    3.16    0.56
   3  15   2    3.25    0.41
   3  15   2    1.91    0.56
  -3 -15   2    1.97    0.54
 -15   3   2    2.37    0.59
 -15   3   2    3.53    0.60
  15  -3   2    2.52    0.61
  15  -3   2    3.31    0.70
  -4 -15  -2   42.85    2.26
   4  15  -2   39.43    2.23
   4  15  -2   42.19    1.87
 -15   4  -2   43.36    2.17
  -4 -15  -2   40.60    1.83
  15  -4  -2   41.89    2.25
   4  15   2   40.14    2.30
   4  15   2   44.61    1.90
  -4 -15   2   41.10    1.89
  15  -4   2   41.84    2.26
  15  -4   2   44.00    2.29
 -15   4   2   44.22    2.36
 -15   4   2   42.34    2.09
  -4 -15   2   44.09    2.33
   5  15  -2    4.76    0.80
  15  -5  -2    4.53    0.77
 -15   5  -2    4.37    0.76
  15  -5  -2    3.87    0.81
   5  15  -2    4.83    0.64
  -5 -15  -2    4.65    0.79
  -5 -15   2    4.52    0.76
  15  -5   2    3.73    0.73
   5  15   2    5.03    0.65
  15  -5   2    6.24    0.89
   5  15   2    4.76    0.83
 -15   5   2    3.78    0.65
  15  -6  -2   28.51    1.70
  -6 -15  -2   30.90    1.81
  15  -6  -2   27.02    1.84
 -15   6  -2   27.84    1.70
   6  15  -2   28.86    1.79
   6  15  -2   27.24    1.53
  15  -6   2   26.87    1.69
 -15   6   2   27.20    1.62
   6  15   2   26.96    1.79
  -6 -15   2   27.17    1.79
   6  15   2   29.47    1.56
  15  -6   2   31.32    1.86
   7  15  -2    7.08    0.82
  -7 -15  -2    6.47    0.93
  15  -7  -2    6.64    0.90
   7  15  -2    6.26    0.93
 -15   7  -2    6.00    0.91
  15  -7  -2    6.52    0.97
  15  -7   2    6.33    0.93
  15  -7   2    7.22    0.80
   7  15   2    6.95    0.88
  -7 -15   2    5.63    0.86
   7  15   2    6.45    0.94
 -15   7   2    7.29    0.82
 -15   8  -2    9.15    0.93
   8  15  -2    5.82    0.94
  -8 -15  -2    7.75    0.92
  15  -8  -2    7.76    1.17
   8  15  -2    7.75    0.97
  15  -8  -2    6.93    0.94
 -15   8   2    7.47    0.98
   8  15   2    9.18    0.93
   8  15   2    6.50    1.08
  15  -8   2    7.37    0.86
  -8 -15   2    6.89    1.02
  15  -8   2    5.41    0.91
  -9 -15  -2    2.54    0.67
   9  15  -2    2.05    0.61
  -9 -15  -2    2.79    0.64
 -15   9  -2    2.01    0.65
   9  15  -2    1.93    0.64
  15  -9  -2    1.19    0.48
 -15   9   2    2.66    0.60
   9  15   2    1.47    0.62
  15  -9   2    1.48    0.62
  15  -9   2    1.47    0.49
  15 -10  -2    9.31    0.94
 -10 -15  -2    9.96    1.88
 -10 -15  -2    9.48    1.03
  10  15  -2    9.37    1.21
 -15  10  -2    8.55    1.17
  15 -10  -2   11.31    1.26
 -10 -15   2   10.77    1.08
  10  15   2    9.96    1.12
  15 -10   2    9.08    0.92
 -15  10   2    9.78    0.99
 -10 -15   2   10.68    1.10
  11  15  -2    4.11    0.84
 -11 -15  -2    4.20    0.79
  15 -11  -2    3.10    0.87
 -15  11  -2    3.67    0.83
 -11 -15  -2    4.59    0.82
  15 -11  -2    3.66    0.66
 -11 -15   2    4.07    0.87
 -15  11   2    2.76    0.69
  11  15   2    3.89    0.85
  15 -11   2    3.01    0.84
  15 -11   2    2.59    0.61
 -11 -15   2    3.44    0.80
 -15  12  -2    1.53    0.67
  15 -12  -2    1.57    0.66
 -12 -15  -2    1.96    0.77
 -12 -15  -2    2.70    0.77
  12  15  -2    2.81    0.82
 -12 -15   2    1.45    0.65
  12  15   2    1.20    0.67
  15 -12   2    2.10    0.76
 -15  12   2    2.53    0.69
 -12 -15   2    2.43    0.77
 -16 -10  -2    1.44    0.60
  16  10  -2    1.49    0.78
 -10  16  -2    0.56    0.56
 -16 -10  -2    1.25    0.64
  10 -16  -2    1.88    0.74
 -16 -10   2    2.07    0.56
 -16 -10   2    1.84    0.65
  10 -16   2    1.82    0.68
  16  10   2    1.29    0.66
 -10  16   2    0.65    0.51
  -9  16  -2   14.84    1.35
 -16  -9  -2   14.04    1.24
 -16  -9  -2   14.49    1.19
   9 -16  -2   15.46    1.43
  16   9  -2   15.41    1.41
 -16  -9   2   13.95    1.33
   9 -16   2   13.32    1.30
  -9  16   2   13.83    1.30
 -16  -9   2   13.71    1.09
  16   9   2   11.89    1.29
 -16  -8  -2    7.20    1.01
   8 -16  -2    8.30    1.19
 -16  -8  -2    7.29    0.87
  16   8  -2    8.37    1.24
  -8  16  -2    9.92    1.10
   8 -16   2    9.05    1.11
  -8  16   2    9.46    1.06
  16   8   2    8.47    1.25
 -16  -8   2    9.09    0.88
 -16  -8   2    8.41    1.01
 -16  -7  -2    3.15    0.67
  16   7  -2    1.40    0.61
 -16  -7  -2    2.70    0.63
   7 -16  -2    2.32    0.68
  -7  16  -2    2.37    0.65
  16   7   2    2.50    0.82
   7 -16   2    2.34    0.72
 -16  -7   2    3.42    0.59
  -7  16   2    2.23    0.62
 -16  -7   2    2.59    0.68
  16   6  -2    4.34    0.88
 -16  -6  -2    4.92    0.81
  -6  16  -2    4.89    0.91
 -16  -6  -2    5.23    0.79
   6 -16  -2    4.80    0.87
   6 -16   2    4.08    0.84
 -16  -6   2    3.56    0.68
  16   6   2    3.17    0.77
 -16  -6   2    3.27    0.75
  -6  16   2    4.31    0.79
 -16  -5  -2    7.24    0.85
   5 -16  -2    8.36    1.19
  16   5  -2    8.47    1.25
  -5  16  -2    7.45    1.08
 -16  -5  -2    6.83    0.86
  -5  16   2    6.45    1.01
 -16  -5   2    8.07    0.94
  16   5   2    9.39    1.24
   5 -16   2    7.74    0.95
 -16  -5   2    8.28    0.85
 -16  -4  -2   19.66    1.28
  -4  16  -2   20.28    1.51
   4 -16  -2   20.07    1.53
 -16  -4  -2   18.74    1.31
  16   4  -2   18.86    1.57
 -16  -4   2   19.45    1.16
 -16  -4   2   18.43    1.41
  -4  16   2   14.57    1.30
   4 -16   2   16.08    1.37
  16   4   2   16.46    1.47
 -16  -3  -2    3.48    0.66
 -16  -3  -2    2.36    0.57
 -16  -3   2    2.96    0.69
 -16  -3   2    3.62    0.61
 -16  -2  -2   25.26    1.50
  16   2  -2   24.38    1.74
 -16  -2  -2   23.60    1.51
  -2  16  -2   24.10    1.66
   2 -16  -2   23.31    1.63
 -16  -2   2   23.91    1.61
  -2  16   2   23.08    1.83
  16   2   2   24.24    1.73
 -16  -2   2   25.53    1.38
   2 -16   2   25.76    1.95
 -16  -1  -2    8.09    0.81
  16   1  -2    7.99    1.10
 -16  -1  -2    7.62    0.85
  -1  16  -2    8.79    1.12
   1 -16  -2    9.35    0.98
 -16  -1   2    8.15    0.75
   1 -16   2    8.93    1.00
  16   1   2    8.73    0.99
  -1  16   2    9.63    1.02
 -16  -1   2    8.93    0.98
   0 -16  -2    5.80    0.91
   0  16  -2    5.16    0.86
 -16   0  -2    6.37    0.81
  16   0  -2    5.57    0.98
 -16   0  -2    5.81    0.85
  16   0   2    5.29    0.96
   0 -16   2    5.85    0.88
 -16   0   2    5.71    0.91
   0  16   2    6.06    0.96
  16  -1  -2    8.95    1.02
   1  16  -2    8.64    0.96
 -16   1  -2   10.30    1.00
 -16   1  -2    8.19    0.87
  -1 -16  -2    9.76    0.99
 -16   1   2    8.19    0.80
 -16   1   2    9.23    1.02
  16  -1   2    9.88    1.01
   1  16   2    8.84    0.97
  -1 -16   2    9.72    0.98
   2  16  -2   23.99    0.98
   2  16  -2   21.79    1.57
  16  -2  -2   26.74    1.73
  -2 -16  -2   23.92    1.62
 -16   2  -2   24.84    1.59
  -2 -16  -2   22.59    0.96
 -16   2  -2   27.39    1.56
  -2 -16   2   23.79    1.62
   2  16   2   22.33    1.61
 -16   2   2   22.56    1.63
  16  -2   2   23.57    1.67
 -16   2   2   26.17    1.46
  16  -3  -2    4.21    0.84
  -3 -16  -2    3.84    0.65
   3  16  -2    2.54    0.67
 -16   3  -2    3.56    0.67
   3  16  -2    4.05    0.47
  -3 -16  -2    3.33    0.75
  16  -3   2    3.66    0.75
   3  16   2    2.89    0.69
   3  16   2    3.18    0.43
  16  -3   2    3.65    0.77
  -3 -16   2    4.13    0.73
 -16   3   2    3.42    0.62
 -16   3   2    4.20    0.85
 -16   4  -2   21.30    1.36
   4  16  -2   16.84    1.39
  -4 -16  -2   17.67    1.36
  16  -4  -2   19.53    1.45
   4  16  -2   17.34    1.02
   4  16   2   17.77    1.03
  -4 -16   2   18.08    1.40
   4  16   2   18.48    1.43
  16  -4   2   18.53    1.40
 -16   4   2   19.00    1.28
  16  -4   2   17.40    1.41
 -16   4   2   17.94    1.41
   5  16  -2    7.71    0.74
 -16   5  -2    6.49    0.94
   5  16  -2    7.71    0.92
  -5 -16  -2    7.74    0.89
  16  -5  -2    6.60    1.06
  16  -5  -2    8.17    1.10
   5  16   2    7.24    0.72
  16  -5   2    8.28    0.96
   5  16   2    7.77    1.14
 -16   5   2    6.91    0.93
  16  -5   2    9.13    1.16
  16  -6  -2    4.74    0.80
   6  16  -2    3.17    0.72
   6  16  -2    4.60    0.70
 -16   6  -2    4.56    0.79
  -6 -16  -2    4.09    0.80
  16  -6  -2    3.37    0.80
   6  16   2    4.83    0.71
  -6 -16   2    3.98    0.99
 -16   6   2    3.94    0.72
  16  -6   2    5.56    0.87
  16  -6   2    5.86    0.93
   7  16  -2    2.49    0.67
 -16   7  -2    1.79    0.59
   7  16  -2    2.38    0.57
  16  -7  -2    2.93    0.65
  -7 -16  -2    2.56    0.64
  16  -7  -2    2.97    0.69
  16  -7   2    2.37    0.61
   7  16   2    2.55    0.58
  -7 -16   2    1.82    0.59
 -16   7   2    2.16    0.59
  16  -7   2    2.72    0.70
   7  16   2    1.96    0.72
   8  16  -2    7.94    1.10
   8  16  -2    9.01    0.95
  16  -8  -2    9.04    0.98
  16  -8  -2    9.39    1.30
  -8 -16  -2    9.91    1.19
  -8 -16   2    8.95    1.00
   8  16   2    7.39    1.10
   8  16   2    7.83    0.99
  16  -8   2    8.36    0.89
  16  -8   2    6.67    1.05
 -16   8   2    7.58    0.91
  -9 -16  -2   12.28    1.42
  16  -9  -2   12.96    1.36
  -9 -16  -2   12.40    1.24
  16  -9  -2   15.22    1.21
   9  16  -2   10.70    1.20
   9  16  -2   15.82    1.26
 -16   9  -2   13.58    1.24
 -16   9   2   12.50    1.18
  -9 -16   2   14.67    1.34
  16  -9   2   14.57    1.17
   9  16   2   14.54    1.22
 -10 -16  -2    2.26    0.77
  16 -10  -2    1.87    0.57
 -16  10  -2    1.50    0.59
 -10 -16  -2    0.95    0.60
  16 -10  -2    2.11    0.75
  10  16  -2    1.12    0.67
 -10 -16   2    2.07    0.66
 -16  10   2    1.06    0.64
  16 -10   2    1.57    0.54
 -10 -16   2    2.86    1.24
  10  16   2    0.69    0.62
  16 -10   2    1.72    0.66
   8 -17  -2    3.54    0.81
 -17  -8  -2    2.50    0.63
  -8  17  -2    3.43    0.82
 -17  -8  -2    3.30    0.78
  17   8  -2    3.46    0.87
  -8  17   2    1.87    0.79
   8 -17   2    2.84    0.78
  17   8   2    2.36    0.77
 -17  -8   2    1.69    0.67
 -17  -8   2    2.76    0.63
  -7  17  -2   21.46    1.62
  17   7  -2   16.77    1.58
 -17  -7  -2   20.74    1.50
 -17  -7  -2   19.99    1.41
   7 -17  -2   23.09    1.78
   7 -17   2   23.99    1.75
 -17  -7   2   22.60    1.35
 -17  -7   2   18.64    1.55
  17   7   2   21.31    1.79
  -7  17   2   20.99    1.63
 -17  -6  -2    3.69    0.72
  17   6  -2    2.70    0.78
   6 -17  -2    3.17    0.84
  -6  17  -2    2.58    0.74
 -17  -6  -2    3.11    0.71
  17   6   2    3.03    0.92
  -6  17   2    2.21    0.68
   6 -17   2    3.62    0.84
 -17  -6   2    2.74    0.73
 -17  -6   2    2.77    0.61
  -5  17  -2    1.75    0.59
 -17  -5  -2    1.50    0.56
 -17  -5  -2    2.29    0.66
  17   5  -2    1.60    0.70
   5 -17  -2    1.20    0.52
  -5  17   2    1.74    0.64
   5 -17   2    1.25    0.56
  17   5   2    2.44    0.77
 -17  -5   2    1.78    0.63
 -17  -5   2    1.72    0.43
 -17  -4  -2    2.85    0.59
  17   4  -2    1.58    0.65
  -4  17  -2    2.38    0.67
   4 -17  -2    1.81    0.60
 -17  -4  -2    3.12    0.64
 -17  -4   2    1.97    0.63
  17   4   2    2.24    0.66
  -4  17   2    1.48    0.65
   4 -17   2    2.30    0.66
 -17  -4   2    2.28    0.53
   3 -17  -2   10.18    1.09
  17   3  -2   10.34    1.36
  -3  17  -2   11.09    1.12
 -17  -3  -2   10.16    1.04
 -17  -3  -2    9.47    0.96
 -17  -3   2   12.84    0.94
   3 -17   2   11.23    1.14
  -3  17   2   12.80    1.27
  17   3   2   10.36    1.15
 -17  -3   2   10.41    1.10
 -17  -2  -2    1.40    0.53
   2 -17  -2    1.89    0.57
 -17  -2  -2    3.11    0.65
  17   2  -2    1.89    0.59
  -2  17  -2    1.25    0.68
 -17  -2   2    2.12    0.53
   2 -17   2    1.49    0.60
  17   2   2    1.39    0.56
  -2  17   2    1.93    0.64
 -17  -2   2    1.30    0.57
 -17  -1  -2    7.07    0.85
   1 -17  -2    7.58    1.11
  -1  17  -2    8.18    0.95
  17   1  -2    7.22    1.07
 -17  -1  -2    7.25    0.98
 -17  -1   2    5.97    0.77
   1 -17   2    6.21    1.00
 -17  -1   2    6.91    1.03
  -1  17   2    7.10    1.12
  17   1   2    8.41    1.19
  17   0  -2    1.78    0.63
 -17   0  -2    1.66    0.52
   0 -17  -2    1.55    0.51
 -17   0  -2    0.78    0.51
   0  17  -2    2.12    0.60
 -17   0   2    2.03    0.51
 -17   0   2    1.54    0.61
  17   0   2    0.46    0.55
   0 -17   2    0.42    0.49
   0  17   2    1.78    0.64
  17  -1  -2    6.35    1.05
 -17   1  -2    6.51    0.89
 -17   1  -2    7.15    0.81
   1  17  -2    5.89    0.94
  -1 -17  -2    7.33    1.05
 -17   1   2    6.49    0.99
   1  17   2    7.16    1.10
  17  -1   2    6.96    1.12
 -17   1   2    6.47    0.84
  -1 -17   2    6.29    0.99
   2  17  -2    1.15    0.59
  -2 -17  -2    1.67    0.55
 -17   2  -2    2.16    0.55
   2  17   2    1.85    0.59
 -17   2   2    3.31    0.74
 -17   2   2    2.91    0.64
  -2 -17   2    2.09    0.62
  17  -3  -2   12.11    1.16
  -3 -17  -2    9.28    1.09
 -17   3  -2   11.12    1.05
   3  17  -2   11.31    0.71
   3  17  -2   12.40    1.17
  -3 -17   2   12.66    1.16
  17  -3   2   11.45    1.11
   3  17   2   10.84    0.65
 -17   3   2   12.09    1.19
 -17   3   2   11.31    0.98
   3  17   2   12.83    1.18
  17  -3   2   10.32    1.16
   4  17  -2    2.05    0.45
   4  17  -2    2.04    0.66
  -4 -17  -2    2.84    0.72
  17  -4  -2    1.56    0.63
 -17   4  -2    1.43    0.52
  17  -4   2    2.16    0.66
 -17   4   2    1.86    0.58
   4  17   2    2.36    0.45
  -4 -17   2    2.79    0.64
   4  17   2    2.16    0.69
  17  -4   2    3.16    0.77
  17  -5  -2    1.27    0.69
  17  -5  -2    2.48    0.69
 -17   5  -2    2.17    0.65
   5  17  -2    2.08    0.48
   5  17  -2    1.62    0.64
  -5 -17  -2    0.45    0.49
   5  17   2    0.95    0.63
  17  -5   2    0.30    0.54
  -5 -17   2    1.93    0.66
   5  17   2    1.92    0.47
 -17   5   2    1.80    0.52
  17  -5   2    1.85    0.70
  17  -6  -2    2.50    0.72
  17  -6  -2    2.01    0.71
  -6 -17  -2    2.45    0.70
   6  17  -2    3.05    0.61
   6  17  -2    3.28    0.81
 -17   6  -2    3.19    0.70
   6  17   2    4.18    0.63
  17  -6   2    2.74    0.71
 -17   6   2    1.63    0.55
   6  17   2    3.06    0.71
  17  -6   2    3.12    0.75
  -6 -17   2    2.97    0.70
  17  -7  -2   20.46    1.71
   7  17  -2   20.52    1.60
 -17   7  -2   21.85    2.20
  17  -7  -2   19.95    1.51
   7  17  -2   22.20    1.40
  -7 -17  -2   22.94    1.62
   7  17   2   19.87    1.36
  -7 -17   2   17.02    1.47
  17  -7   2   22.50    1.67
 -17   7   2   20.47    1.43
  17  -7   2   19.51    1.52
   7  17   2   18.83    1.55
   8  17  -2    3.10    0.77
  17  -8  -2    3.17    0.73
   8  17  -2    2.71    0.70
  17  -8  -2    2.75    0.85
  -8 -17  -2    3.67    0.82
 -17   8  -2    2.76    0.73
   8  17   2    2.52    0.74
  -8 -17   2    2.89    0.75
   8  17   2    1.88    0.68
  17  -8   2    2.64    0.67
 -17   8   2    2.74    0.78
   6 -18  -2    4.97    0.94
  -6  18  -2    5.20    1.05
 -18  -6  -2    5.18    0.88
  18   6  -2    5.46    1.07
 -18  -6  -2    5.29    0.84
   6 -18   2    5.92    1.06
  -6  18   2    4.44    0.89
 -18  -6   2    5.07    0.73
  18   6   2    4.83    1.05
 -18  -6   2    4.61    0.87
  -5  18  -2   19.44    1.64
   5 -18  -2   21.58    1.72
  18   5  -2   20.38    1.70
 -18  -5  -2   19.24    1.47
 -18  -5  -2   20.09    1.42
   5 -18   2   19.04    1.57
 -18  -5   2   14.94    1.46
  -5  18   2   19.37    1.61
  18   5   2   18.01    1.63
 -18  -5   2   21.73    1.33
 -18  -4  -2    2.39    0.63
  18   4  -2    3.01    0.83
 -18  -4  -2    2.56    0.70
  -4  18  -2    1.72    0.62
   4 -18  -2    3.08    0.74
  18   4   2    3.00    0.93
  -4  18   2    2.19    0.66
 -18  -4   2    2.42    0.70
   4 -18   2    2.81    0.77
 -18  -4   2    1.72    0.54
 -18  -3  -2    2.39    0.62
 -18  -3  -2    4.31    0.75
  -3  18  -2    2.36    0.68
  18   3  -2    3.95    0.90
   3 -18  -2    4.05    0.85
  18   3   2    2.90    0.88
  -3  18   2    5.21    0.98
   3 -18   2    4.33    0.94
 -18  -3   2    5.06    0.88
 -18  -3   2    4.58    0.70
 -18  -2  -2   15.18    1.28
  -2  18  -2   13.36    1.31
   2 -18  -2   14.71    1.40
  18   2  -2   12.73    1.46
 -18  -2  -2   16.52    1.27
 -18  -2   2   19.01    1.49
   2 -18   2   19.49    1.52
  18   2   2   15.68    1.54
 -18  -2   2   16.33    1.15
  -2  18   2   16.49    1.44
  -1  18  -2   11.46    1.24
 -18  -1  -2   10.87    1.01
   1 -18  -2   10.72    1.18
 -18  -1  -2    9.37    1.05
  18   1  -2    9.87    1.12
 -18  -1   2   11.32    0.98
 -18  -1   2   10.73    1.12
   1 -18   2   11.66    1.19
  18   1   2   11.91    1.21
  -1  18   2    9.49    1.11
   0  18  -2    0.60    0.48
  18   0  -2    0.80    0.64
   0 -18  -2    0.63    0.49
 -18   0  -2   -0.33    0.42
 -18   0  -2    1.11    0.52
 -18   0   2   -0.08    0.43
  18   0   2    0.08    0.59
   0  18   2    0.83    0.56
 -18   0   2    0.63    0.56
   0 -18   2    0.22    0.50
   1  18  -2    9.54    1.12
 -18   1  -2   11.94    1.05
  -1 -18  -2   11.94    1.20
 -18   1  -2   10.40    1.09
  18  -1  -2   12.37    1.30
  -1 -18   2   10.54    1.19
   1  18   2    7.54    1.12
 -18   1   2   10.13    1.18
 -18   1   2   11.52    0.99
  18  -1   2   10.70    1.19
  -2 -18  -2   17.79    1.39
 -18   2  -2   14.98    1.24
  18  -2  -2   14.86    1.38
   2  18  -2   14.95    1.39
  18  -2   2   16.10    1.43
   2  18   2   15.49    1.41
  -2 -18   2   13.26    1.29
 -18   2   2   14.60    1.38
  18  -2   2   13.35    1.27
 -18   2   2   12.70    1.09
  -3 -18  -2    5.28    0.91
 -18   3  -2    5.33    0.86
   3  18  -2    3.68    0.85
  18  -3  -2    5.82    1.06
  18  -3   2    4.38    0.86
  -3 -18   2    4.69    0.93
 -18   3   2    4.78    0.91
   3  18   2    3.49    0.88
 -18   3   2    5.31    0.82
  18  -3   2    3.80    0.88
 -18   4  -2    1.71    0.59
   4  18  -2    3.61    0.84
  18  -4  -2    3.00    0.83
  -4 -18  -2    1.87    0.63
  18  -4  -2    3.00    0.82
 -18   4   2    2.97    0.69
  18  -4   2    3.37    0.83
  -4 -18   2    1.82    0.65
  18  -4   2    2.86    0.80
   4  18   2    3.63    0.91
  18  -5  -2   19.75    1.59
 -18   5  -2   19.91    1.51
   5  18  -2   17.34    1.13
  18  -5  -2   17.27    1.59
   5  18  -2   17.74    1.54
  -5 -18  -2   18.95    1.51
 -18   5   2   23.58    1.50
  18  -5   2   19.48    1.58
  18  -5   2   21.69    1.60
   5  18   2   18.82    1.15
  -5 -18   2   18.59    1.55
   5  18   2   18.58    1.56
  -6 -18  -2    4.45    0.90
  18  -6  -2    5.37    0.96
   6  18  -2    4.40    0.70
   6  18  -2    4.01    0.88
 -18   6  -2    7.08    1.04
  18  -6  -2    4.00    0.86
 -18   6   2    6.50    0.93
  18  -6   2    4.57    0.94
  18  -6   2    6.33    1.06
   6  18   2    4.91    0.70
  -6 -18   2    4.15    0.82
   6  18   2    4.36    0.90
 -19  -2  -2    2.12    0.64
  19   2  -2    0.69    0.59
  -2  19  -2    1.09    0.59
 -19  -2  -2    1.09    0.61
   2 -19  -2    1.64    0.74
   2 -19   2    2.27    0.66
  19   2   2    1.46    0.68
 -19  -2   2    1.69    0.51
 -19  -2   2    1.29    0.65
  -2  19   2    2.12    0.68
  19   1  -2    1.51    0.78
   1 -19  -2    0.93    0.55
 -19  -1  -2    1.09    0.58
 -19  -1  -2    1.58    0.61
  -1  19  -2    0.21    0.46
  19   1   2    2.49    0.86
 -19  -1   2    2.17    0.56
   1 -19   2    1.19    0.66
  -1  19   2    0.99    0.59
 -19  -1   2    0.94    0.67
   0  19  -2   36.11    2.26
  19   0  -2   33.10    2.29
 -19   0  -2   34.47    1.98
 -19   0  -2   35.21    2.09
   0 -19  -2   33.13    2.18
 -19   0   2   34.69    1.88
  19   0   2   33.64    2.32
   0  19   2   32.63    2.25
 -19   0   2   34.45    2.24
   0 -19   2   38.96    2.30
  19  -1  -2    1.05    0.65
   1  19  -2    1.14    0.60
 -19   1  -2    1.91    0.61
  -1 -19  -2   -0.13    0.47
  19  -1   2    2.07    0.80
 -19   1   2    1.26    0.56
  -1 -19   2    0.38    0.49
   1  19   2    1.79    0.64
  -2 -19  -2    2.37    0.80
   2  19  -2    0.77    0.64
 -19   2  -2    1.63    0.61
  19  -2  -2    1.57    0.73
 -19   2   2    1.04    0.53
  19  -2   2    1.80    0.69
 -19   2   2    1.70    0.72
  19  -2   2    1.27    0.70
  -2 -19   2    1.02    0.59
   2  19   2    0.75    0.63
   0   0  -3   -0.01    0.03
   0   0  -3   -0.02    0.02
   0   0  -3    0.01    0.03
   0   0   3   -0.02    0.02
   0   0   3    0.03    0.03
   0   0   3    0.00    0.03
   1   0  -3   -0.01    0.02
   0  -1  -3    0.05    0.04
   0   1  -3    0.10    0.05
  -1   0  -3    0.00    0.03
   1   0  -3    0.04    0.03
   1   0  -3    0.08    0.05
   0   1  -3   -0.02    0.04
  -1   0  -3    0.04    0.02
   1   0  -3    0.07    0.02
   0  -1  -3    0.04    0.03
  -1   0  -3    0.11    0.05
   0  -1  -3    0.10    0.04
   0   1  -3    0.04    0.03
  -1   0   3    0.09    0.04
   1   0   3    0.08    0.04
   0  -1   3    0.07    0.03
   0   1   3    0.06    0.04
   0  -1   3    0.03    0.04
   0   1   3    0.07    0.04
   1   0   3    0.07    0.04
   0  -1   3   -0.01    0.03
   0   1   3    0.05    0.04
  -1   0   3    0.05    0.04
   1   0   3    0.03    0.02
   1  -1  -3    0.20    0.05
  -1   1  -3    0.30    0.08
   1  -1  -3    0.16    0.06
  -1  -1  -3    0.18    0.07
  -1  -1  -3    0.17    0.04
  -1  -1  -3    0.19    0.06
   1   1  -3    0.18    0.07
   1  -1  -3    0.19    0.06
   1   1  -3    0.14    0.04
  -1   1  -3    0.22    0.05
   1   1  -3    0.21    0.07
  -1   1  -3    0.22    0.07
   1  -1  -3    0.22    0.08
  -1  -1  -3    0.23    0.04
   1   1   3    0.19    0.07
  -1  -1   3    0.23    0.08
  -1  -1   3    0.15    0.06
   1  -1   3    0.16    0.06
  -1   1   3    0.17    0.05
   1  -1   3    0.20    0.07
   1  -1   3    0.17    0.04
  -1  -1   3    0.17    0.04
   1   1   3    0.13    0.06
  -1   1   3    0.15    0.06
  -1   2  -3    0.31    0.09
  -2  -1  -3    0.29    0.09
   2   1  -3    0.56    0.12
   1  -2  -3    0.39    0.09
  -2  -1  -3    0.35    0.04
  -1   2  -3    0.43    0.10
   1  -2  -3    0.33    0.08
   1  -2  -3    0.50    0.11
  -2  -1  -3    0.40    0.10
   2   1  -3    0.35    0.11
  -1   2  -3    0.29    0.07
   1  -2   3    0.25    0.09
  -1   2   3    0.33    0.09
   2   1   3    0.34    0.10
  -1   2   3    0.23    0.07
  -2  -1   3    0.22    0.09
   2   1   3    0.30    0.09
   1  -2   3    0.42    0.09
  -1   2   3    0.38    0.10
  -2  -1   3    0.50    0.12
   1  -2   3    0.29    0.07
   2   1   3    0.38    0.04
   2   0  -3    4.29    0.27
  -2   0  -3    3.31    0.23
   0  -2  -3    3.36    0.21
  -2   0  -3    3.56    0.24
   0   2  -3    4.06    0.25
   0  -2  -3    3.65    0.24
   0   2  -3    3.07    0.21
   0   2  -3    3.25    0.22
   2   0  -3    2.83    0.14
   0  -2  -3    3.44    0.23
   0  -2  -3    4.08    0.25
   2   0  -3    3.24    0.24
   2   0   3    3.71    0.24
   0  -2   3    3.77    0.25
   0   2   3    3.19    0.21
  -2   0   3    3.17    0.15
   2   0   3    3.15    0.16
   0   2   3    3.76    0.24
  -2   0   3    3.34    0.24
   2   0   3    3.73    0.15
   2   0   3    3.22    0.23
   0  -2   3    3.32    0.22
  -2   0   3    3.62    0.26
  -1  -2  -3    0.41    0.10
   2  -1  -3    0.41    0.10
  -2   1  -3    0.25    0.08
   1   2  -3    0.42    0.11
   2  -1  -3    0.27    0.06
   1   2  -3    0.29    0.07
   1   2  -3    0.29    0.09
   2  -1  -3    0.42    0.11
  -2   1  -3    0.40    0.09
  -1  -2  -3    0.35    0.09
  -2   1  -3    0.39    0.07
  -1  -2  -3    0.31    0.07
   1   2   3    0.36    0.10
  -1  -2   3    0.41    0.10
  -1  -2   3    0.30    0.07
  -1  -2   3    0.39    0.10
   2  -1   3    0.39    0.11
  -2   1   3    0.52    0.12
   2  -1   3    0.30    0.09
  -2   1   3    0.32    0.09
  -2   1   3    0.39    0.07
   1   2   3    0.44    0.08
   1   2   3    0.32    0.08
   2  -1   3    0.27    0.06
   2   2  -3    0.09    0.08
  -2  -2  -3    0.11    0.07
  -2  -2  -3    0.05    0.07
  -2   2  -3    0.10    0.06
   2   2  -3    0.03    0.07
  -2   2  -3    0.07    0.07
  -2  -2  -3    0.07    0.05
   2  -2  -3    0.12    0.10
   2   2  -3    0.06    0.04
   2  -2  -3    0.11    0.07
  -2  -2  -3    0.00    0.06
  -2   2  -3    0.11    0.07
   2  -2  -3    0.09    0.06
  -2  -2   3    0.06    0.06
  -2  -2   3    0.10    0.07
  -2   2   3    0.08    0.07
   2  -2   3    0.22    0.07
   2   2   3    0.01    0.06
   2   2   3    0.00    0.04
  -2   2   3    0.20    0.08
  -2  -2   3    0.05    0.05
   2  -2   3    0.09    0.06
  -2   2   3    0.16    0.07
   2  -2   3    0.06    0.07
  -3  -2  -3    0.16    0.08
   3   2  -3    0.09    0.07
  -2   3  -3    0.07    0.06
   3   2  -3    0.31    0.11
   3   2  -3    0.14    0.05
   2  -3  -3    0.19    0.09
  -3  -2  -3    0.18    0.05
  -2   3  -3    0.15    0.08
   2  -3  -3    0.25    0.11
  -3  -2  -3    0.07    0.08
  -2   3  -3    0.17    0.10
   2  -3  -3    0.19    0.07
  -3  -2   3    0.20    0.10
   3   2   3    0.06    0.08
   3   2   3    0.16    0.05
   2  -3   3    0.10    0.07
   2  -3   3    0.07    0.08
  -3  -2   3    0.09    0.09
   3   2   3    0.15    0.09
  -2   3   3    0.21    0.09
   2  -3   3    0.15    0.09
  -3  -2   3    0.13    0.05
   1  -3  -3    4.66    0.32
  -1   3  -3    3.30    0.22
   1  -3  -3    4.56    0.33
  -3  -1  -3    3.80    0.29
   1  -3  -3    4.24    0.29
  -1   3  -3    3.57    0.27
   1  -3  -3    3.57    0.22
  -3  -1  -3    3.69    0.28
  -3  -1  -3    4.16    0.20
  -1   3  -3    4.49    0.30
   3   1  -3    4.56    0.31
   3   1  -3    3.96    0.30
   1  -3   3    3.38    0.27
   1  -3   3    4.24    0.29
  -1   3   3    4.27    0.29
   3   1   3    3.47    0.28
   1  -3   3    3.84    0.23
  -3  -1   3    4.03    0.30
  -3  -1   3    3.06    0.26
  -1   3   3    3.69    0.23
  -3  -1   3    3.55    0.17
  -3  -1   3    3.38    0.17
   3   1   3    3.70    0.28
   3   1   3    4.09    0.21
   0   3  -3    0.59    0.14
  -3   0  -3    0.54    0.12
   3   0  -3    0.44    0.12
   0  -3  -3    0.57    0.12
   3   0  -3    0.38    0.07
   3   0  -3    0.71    0.14
   0   3  -3    0.47    0.11
   0  -3  -3    0.45    0.11
   0  -3  -3    0.58    0.10
   0   3  -3    0.50    0.10
   0   3  -3    0.60    0.10
  -3   0  -3    0.61    0.13
  -3   0  -3    0.64    0.08
   0   3   3    0.57    0.11
   3   0   3    0.49    0.11
   3   0   3    0.45    0.12
   0   3   3    0.39    0.09
   3   0   3    0.49    0.09
  -3   0   3    0.24    0.09
  -3   0   3    0.39    0.13
  -3   0   3    0.34    0.06
   0   3   3    0.69    0.14
   0  -3   3    0.39    0.09
   0  -3   3    0.43    0.11
  -3   1  -3    3.44    0.27
  -1  -3  -3    4.01    0.29
   3  -1  -3    5.07    0.34
   1   3  -3    4.07    0.30
  -1  -3  -3    4.29    0.27
   3  -1  -3    3.36    0.21
   1   3  -3    3.40    0.25
   1   3  -3    3.67    0.25
  -1  -3  -3    3.50    0.24
  -3   1  -3    3.55    0.26
   3  -1  -3    3.30    0.27
   1   3   3    4.65    0.29
  -1  -3   3    3.79    0.26
  -1  -3   3    3.52    0.25
  -3   1   3    4.21    0.32
   3  -1   3    4.39    0.25
   3  -1   3    4.43    0.29
   1   3   3    3.27    0.24
   3  -1   3    4.33    0.25
  -3   1   3    3.28    0.26
  -1  -3   3    3.90    0.30
   3  -1   3    3.86    0.28
  -3   1   3    3.60    0.22
   1   3   3    4.41    0.31
  -2  -3  -3    0.13    0.07
  -3   2  -3    0.20    0.08
  -2  -3  -3    0.12    0.08
   3  -2  -3    0.14    0.10
   2   3  -3    0.24    0.11
  -3   2  -3    0.26    0.10
  -2  -3  -3    0.08    0.07
   3  -2  -3    0.11    0.06
   2   3  -3    0.17    0.08
   2   3  -3    0.11    0.06
  -3   2  -3    0.11    0.07
   3  -2  -3    0.20    0.08
   3  -2   3    0.18    0.08
  -2  -3   3    0.11    0.06
   3  -2   3    0.14    0.07
   3  -2   3    0.24    0.10
  -3   2   3    0.21    0.08
  -2  -3   3    0.22    0.11
   2   3   3    0.14    0.08
  -3   2   3    0.26    0.09
  -3   2   3    0.06    0.08
  -2  -3   3    0.08    0.07
   2   3   3    0.20    0.08
   2   3   3    0.29    0.11
  -3   3  -3    2.89    0.31
   3  -3  -3    2.81    0.25
  -3  -3  -3    3.88    0.30
   3   3  -3    3.40    0.28
   3  -3  -3    3.30    0.25
   3   3  -3    3.03    0.28
  -3  -3  -3    3.51    0.29
   3   3  -3    3.64    0.23
  -3   3  -3    4.08    0.32
  -3  -3  -3    3.50    0.24
  -3  -3  -3    3.52    0.30
   3  -3  -3    4.10    0.35
  -3   3  -3    3.45    0.25
  -3  -3   3    3.62    0.31
  -3  -3   3    3.63    0.23
  -3  -3   3    3.80    0.30
   3   3   3    3.59    0.30
   3  -3   3    3.90    0.30
   3  -3   3    3.29    0.29
   3   3   3    3.80    0.24
  -3   3   3    3.23    0.24
   3  -3   3    3.38    0.25
  -3   3   3    4.03    0.41
  -3   3   3    3.54    0.28
   3  -4  -3    0.17    0.14
  -4  -3  -3    0.04    0.10
   4   3  -3    0.04    0.06
   3  -4  -3    0.21    0.13
  -4  -3  -3    0.21    0.12
  -3   4  -3    0.25    0.08
   3  -4  -3    0.13    0.10
   4   3  -3    0.19    0.11
  -4  -3  -3    0.19    0.08
   3  -4  -3    0.19    0.08
  -3   4  -3    0.14    0.11
  -3   4  -3    0.32    0.13
   4   3  -3    0.17    0.13
  -4  -3  -3    0.07    0.09
   3  -4   3    0.19    0.11
  -4  -3   3    0.11    0.07
   4   3   3    0.20    0.08
  -4  -3   3    0.16    0.10
  -3   4   3    0.02    0.07
   4   3   3    0.21    0.12
  -3   4   3    0.16    0.09
   3  -4   3    0.32    0.14
   3  -4   3    0.14    0.07
  -4  -3   3    0.19    0.11
  -2   4  -3    0.42    0.14
  -2   4  -3    0.25    0.13
  -4  -2  -3    0.38    0.09
  -4  -2  -3    0.24    0.11
  -2   4  -3    0.16    0.07
   2  -4  -3    0.40    0.16
   2  -4  -3    0.40    0.08
  -4  -2  -3    0.32    0.13
   2  -4  -3    0.24    0.08
   4   2  -3    0.37    0.13
   2  -4  -3    0.44    0.15
   2  -4  -3    0.30    0.11
   2  -4   3    0.44    0.15
   4   2   3    0.41    0.09
  -4  -2   3    0.48    0.15
  -4  -2   3    0.30    0.11
  -4  -2   3    0.36    0.08
   4   2   3    0.31    0.12
   2  -4   3    0.19    0.08
  -2   4   3    0.15    0.10
   2  -4   3    0.44    0.14
  -4  -2   3    0.32    0.07
   1  -4  -3    0.56    0.15
   4   1  -3    0.53    0.14
  -4  -1  -3    0.61    0.14
   4   1  -3    0.60    0.07
  -1   4  -3    0.57    0.10
  -4  -1  -3    0.65    0.10
  -4  -1  -3    0.52    0.14
   1  -4  -3    0.36    0.12
   1  -4  -3    0.54    0.09
   4   1  -3    0.51    0.15
  -1   4  -3    0.66    0.16
  -1   4  -3    0.54    0.15
   4   1   3    0.36    0.14
  -1   4   3    0.55    0.15
  -1   4   3    0.50    0.14
   1  -4   3    0.53    0.14
   4   1   3    0.57    0.09
   4   1   3    0.45    0.12
  -4  -1   3    0.48    0.14
   1  -4   3    0.44    0.09
   1  -4   3    0.57    0.14
  -4  -1   3    0.39    0.07
  -1   4   3    0.43    0.09
  -4  -1   3    0.53    0.15
   0  -4  -3    4.15    0.31
   0  -4  -3    3.90    0.30
   0   4  -3    3.18    0.22
   0  -4  -3    3.22    0.22
   4   0  -3    3.68    0.31
   0   4  -3    3.66    0.28
  -4   0  -3    3.52    0.29
   4   0  -3    2.95    0.19
  -4   0  -3    3.30    0.27
   0   4  -3    3.19    0.29
  -4   0  -3    4.13    0.24
   0   4  -3    3.13    0.22
   4   0  -3    2.99    0.28
  -4   0   3    4.26    0.34
   0   4   3    3.24    0.22
   4   0   3    3.89    0.23
   0  -4   3    3.69    0.30
   4   0   3    3.32    0.29
  -4   0   3    2.91    0.19
   0   4   3    3.57    0.30
   0   4   3    3.56    0.30
   4   0   3    3.24    0.27
   0  -4   3    3.41    0.28
  -4   0   3    3.44    0.29
  -1  -4  -3    0.57    0.14
  -1  -4  -3    0.42    0.10
   4  -1  -3    0.56    0.17
  -1  -4  -3    0.57    0.13
  -4   1  -3    0.35    0.12
   1   4  -3    0.36    0.13
   1   4  -3    0.31    0.10
   4  -1  -3    0.37    0.09
   1   4  -3    0.38    0.10
   4  -1  -3    0.50    0.13
  -4   1  -3    0.50    0.13
  -4   1   3    0.41    0.09
   1   4   3    0.67    0.15
   1   4   3    0.52    0.15
   4  -1   3    0.76    0.13
   4  -1   3    0.62    0.12
  -4   1   3    0.27    0.11
  -1  -4   3    0.41    0.11
  -1  -4   3    0.73    0.15
   4  -1   3    0.55    0.14
   1   4   3    0.42    0.10
   4  -1   3    0.47    0.14
  -1  -4   3    0.70    0.16
  -4   1   3    0.63    0.16
  -4   2  -3    0.33    0.11
  -2  -4  -3    0.34    0.10
   4  -2  -3    0.31    0.10
   2   4  -3    0.34    0.11
  -2  -4  -3    0.35    0.10
   2   4  -3    0.34    0.13
  -2  -4  -3    0.62    0.16
   4  -2  -3    0.22    0.10
   2   4  -3    0.27    0.10
   4  -2  -3    0.25    0.11
  -4   2   3    0.25    0.09
  -4   2   3    0.25    0.11
  -2  -4   3    0.19    0.10
   4  -2   3    0.19    0.09
   2   4   3    0.40    0.12
  -2  -4   3    0.42    0.16
   4  -2   3    0.18    0.10
   2   4   3    0.29    0.09
  -2  -4   3    0.38    0.10
   4  -2   3    0.30    0.12
   4  -2   3    0.28    0.11
   3   4  -3    0.20    0.11
  -3  -4  -3    0.23    0.09
  -3  -4  -3    0.20    0.11
   4  -3  -3    0.10    0.12
  -3  -4  -3    0.09    0.09
   3   4  -3    0.16    0.10
   4  -3  -3    0.11    0.09
   3   4  -3    0.22    0.09
   4  -3  -3    0.14    0.09
  -4   3  -3    0.11    0.10
  -4   3  -3    0.19    0.11
  -4   3  -3    0.09    0.08
   3   4   3    0.14    0.08
  -4   3   3    0.13    0.12
  -4   3   3    0.11    0.07
  -3  -4   3    0.12    0.08
   3   4   3    0.18    0.11
  -3  -4   3    0.22    0.12
   3   4   3    0.09    0.11
   4  -3   3    0.16    0.09
  -4   3   3    0.15    0.08
   4  -3   3    0.11    0.09
  -3  -4   3    0.10    0.09
   4  -3   3    0.13    0.11
   4  -4  -3    0.61    0.16
   4   4  -3    0.61    0.18
  -4  -4  -3    0.70    0.18
  -4   4  -3    0.77    0.20
   4   4  -3    0.80    0.20
  -4  -4  -3    0.75    0.18
   4  -4  -3    0.65    0.24
  -4  -4  -3    0.72    0.15
  -4   4  -3    1.03    0.21
   4  -4  -3    0.51    0.12
  -4  -4  -3    0.81    0.19
  -4   4  -3    0.84    0.15
   4   4  -3    0.89    0.16
  -4   4   3    0.58    0.17
   4  -4   3    0.69    0.21
   4   4   3    0.71    0.14
  -4  -4   3    0.63    0.17
   4   4   3    0.83    0.20
   4  -4   3    0.86    0.16
   4  -4   3    1.03    0.21
  -4  -4   3    0.73    0.13
  -4  -4   3    0.86    0.21
  -4   4   3    0.73    0.16
  -4   5  -3    2.95    0.34
  -5  -4  -3    2.75    0.31
   5   4  -3    2.29    0.35
   5   4  -3    2.75    0.33
   4  -5  -3    3.16    0.43
  -5  -4  -3    2.62    0.29
   4  -5  -3    2.75    0.41
  -4   5  -3    2.63    0.22
  -5  -4  -3    3.39    0.28
   4  -5  -3    2.36    0.22
   4  -5  -3    2.51    0.39
  -4   5  -3    2.57    0.43
   5   4  -3    2.98    0.27
  -5  -4  -3    3.39    0.34
   5   4   3    2.40    0.36
   4  -5   3    2.98    0.32
   4  -5   3    2.49    0.23
  -5  -4   3    2.49    0.23
   5   4   3    2.77    0.26
  -5  -4   3    3.08    0.35
  -4   5   3    2.48    0.23
  -4   5   3    2.43    0.29
   4  -5   3    2.08    0.34
  -5  -4   3    2.16    0.33
  -3   5  -3   -0.04    0.10
   3  -5  -3    0.10    0.06
   3  -5  -3    0.07    0.13
  -5  -3  -3    0.07    0.10
  -5  -3  -3    0.03    0.07
   5   3  -3   -0.13    0.10
  -3   5  -3    0.00    0.11
   5   3  -3    0.07    0.09
   3  -5  -3    0.02    0.09
   3  -5  -3   -0.01    0.06
  -5  -3  -3    0.05    0.12
   3  -5  -3    0.18    0.13
  -3   5  -3   -0.01    0.07
   3  -5   3    0.11    0.11
  -3   5   3    0.16    0.13
   5   3   3    0.01    0.07
   3  -5   3    0.08    0.07
  -5  -3   3    0.06    0.11
   5   3   3   -0.10    0.08
   3  -5   3    0.08    0.12
  -5  -3   3   -0.01    0.07
  -5  -3   3    0.13    0.12
  -5  -3   3    0.00    0.06
   2  -5  -3    0.48    0.16
   5   2  -3    0.30    0.13
  -5  -2  -3    0.62    0.17
   2  -5  -3    0.44    0.09
  -2   5  -3    0.76    0.21
  -2   5  -3    0.27    0.13
   5   2  -3    0.25    0.14
  -5  -2  -3    0.57    0.12
  -5  -2  -3    0.38    0.13
   2  -5  -3    0.47    0.14
   2  -5  -3    0.47    0.09
  -2   5  -3    0.40    0.09
   5   2   3    0.56    0.15
  -5  -2   3    0.37    0.14
  -5  -2   3    0.36    0.10
   2  -5   3    0.57    0.19
   2  -5   3    0.45    0.16
   2  -5   3    0.46    0.09
  -5  -2   3    0.64    0.18
   5   2   3    0.64    0.18
  -2   5   3    0.58    0.17
   5   2   3    0.41    0.10
  -5  -2   3    0.61    0.11
   5   1  -3    5.02    0.28
   1  -5  -3    6.64    0.45
   1  -5  -3    5.19    0.28
  -1   5  -3    4.86    0.39
  -5  -1  -3    6.36    0.34
  -5  -1  -3    4.98    0.38
  -1   5  -3    4.95    0.28
   5   1  -3    5.72    0.42
   1  -5  -3    6.14    0.45
  -5  -1  -3    4.94    0.39
  -1   5  -3    5.81    0.44
   5   1  -3    5.85    0.43
  -1   5  -3    4.83    0.28
  -5  -1   3    5.81    0.44
  -1   5   3    5.72    0.42
   5   1   3    5.44    0.39
  -1   5   3    5.41    0.28
   1  -5   3    4.93    0.39
   1  -5   3    6.00    0.44
  -5  -1   3    5.37    0.29
   5   1   3    5.44    0.42
  -5  -1   3    4.86    0.39
  -1   5   3    5.26    0.43
   5   1   3    6.02    0.32
   5   0  -3    0.57    0.11
   0  -5  -3    0.97    0.20
   0   5  -3    0.67    0.12
   0  -5  -3    0.76    0.19
   0  -5  -3    0.61    0.11
  -5   0  -3    0.63    0.16
  -5   0  -3    0.95    0.15
   5   0  -3    0.91    0.20
   0   5  -3    0.61    0.15
   0   5  -3    0.70    0.12
  -5   0  -3    0.69    0.16
   5   0  -3    0.89    0.19
   0   5  -3    0.68    0.18
   0  -5   3    0.70    0.18
   5   0   3    0.82    0.16
   0   5   3    0.53    0.16
  -5   0   3    0.67    0.17
   5   0   3    0.86    0.19
   0   5   3    0.82    0.19
   0   5   3    0.79    0.13
   5   0   3    0.78    0.13
  -5   0   3    1.04    0.23
  -5   0   3    0.74    0.12
   0  -5   3    0.75    0.18
   5  -1  -3    4.87    0.31
   1   5  -3    6.17    0.44
   1   5  -3    5.03    0.33
  -1  -5  -3    6.07    0.42
  -5   1  -3    6.67    0.38
  -1  -5  -3    5.72    0.34
  -1  -5  -3    5.25    0.40
   1   5  -3    5.97    0.41
  -5   1  -3    4.92    0.38
   5  -1  -3    5.54    0.41
  -5   1  -3    5.28    0.39
   5  -1  -3    6.45    0.46
   5  -1   3    5.01    0.38
   1   5   3    5.82    0.43
   5  -1   3    5.32    0.41
  -5   1   3    5.02    0.32
   1   5   3    5.10    0.33
  -1  -5   3    5.73    0.43
  -1  -5   3    5.10    0.38
  -1  -5   3    5.21    0.34
  -5   1   3    4.62    0.37
   1   5   3    6.32    0.43
   5  -1   3    6.53    0.38
  -5   1   3    6.86    0.49
  -5   2  -3    0.29    0.12
  -2  -5  -3    0.38    0.12
  -2  -5  -3    0.37    0.14
   5  -2  -3    0.32    0.17
   5  -2  -3    0.37    0.11
  -5   2  -3    0.29    0.14
   2   5  -3    0.43    0.16
   2   5  -3    0.54    0.15
   2   5  -3    0.54    0.15
  -2  -5  -3    0.75    0.16
   2   5   3    0.47    0.15
  -2  -5   3    0.36    0.11
  -5   2   3    0.51    0.16
  -5   2   3    0.32    0.13
   5  -2   3    0.34    0.13
   2   5   3    0.42    0.13
   2   5   3    0.55    0.14
  -5   2   3    0.50    0.13
   5  -2   3    0.45    0.15
   5  -2   3    0.57    0.14
  -2  -5   3    0.47    0.15
  -2  -5   3    0.39    0.12
   5  -3  -3    0.17    0.11
   3   5  -3    0.09    0.10
   5  -3  -3    0.03    0.14
  -5   3  -3    0.01    0.10
   3   5  -3    0.09    0.12
   3   5  -3    0.06    0.14
  -3  -5  -3    0.19    0.11
  -3  -5  -3    0.06    0.09
   5  -3  -3    0.13    0.11
  -5   3  -3    0.23    0.11
   5  -3   3    0.14    0.10
   5  -3   3    0.17    0.11
  -3  -5   3    0.07    0.11
   3   5   3    0.08    0.11
   5  -3   3    0.05    0.14
  -5   3   3    0.23    0.15
  -5   3   3    0.04    0.09
  -3  -5   3    0.08    0.08
   5  -3   3    0.03    0.10
  -3  -5   3    0.08    0.12
   3   5   3    0.11    0.11
  -5   3   3   -0.04    0.09
   3   5   3    0.09    0.12
   4   5  -3    3.25    0.29
  -5   4  -3    2.46    0.37
   5  -4  -3    2.36    0.38
  -5   4  -3    2.22    0.24
   5  -4  -3    2.48    0.30
   4   5  -3    2.69    0.31
  -4  -5  -3    2.52    0.28
   4   5  -3    3.45    0.36
  -4  -5  -3    2.49    0.29
   5  -4  -3    2.52    0.26
  -4  -5  -3    2.86    0.29
   5  -4   3    2.10    0.31
   4   5   3    2.69    0.31
   5  -4   3    2.74    0.27
  -5   4   3    2.99    0.31
  -4  -5   3    2.83    0.34
   4   5   3    3.76    0.36
  -4  -5   3    2.44    0.28
  -5   4   3    2.85    0.36
   4   5   3    2.79    0.28
   5  -4   3    3.29    0.34
   5  -4   3    3.20    0.34
  -5   4   3    2.77    0.27
  -4  -5   3    2.83    0.26
   5   5  -3    0.08    0.14
   5  -5  -3   -0.05    0.09
   5   5  -3   -0.05    0.14
   5  -5  -3    0.07    0.13
  -5   5  -3    0.35    0.17
  -5  -5  -3   -0.06    0.12
  -5  -5  -3    0.15    0.15
  -5   5  -3    0.35    0.20
   5  -5  -3    0.19    0.15
  -5  -5  -3    0.08    0.13
   5   5  -3    0.00    0.10
  -5   5  -3   -0.02    0.10
   5  -5  -3    0.06    0.19
  -5  -5  -3    0.27    0.17
  -5  -5   3    0.09    0.14
  -5   5   3    0.19    0.12
   5  -5   3    0.18    0.17
  -5  -5   3    0.16    0.14
  -5   5   3    0.04    0.13
   5   5   3    0.22    0.17
  -5  -5   3    0.02    0.10
   5  -5   3    0.18    0.15
   5   5   3    0.21    0.12
   5  -5   3    0.14    0.11
  -5   6  -3    3.41    0.50
   5  -6  -3    2.10    0.37
  -5   6  -3    2.37    0.24
  -6  -5  -3    3.03    0.33
   5  -6  -3    2.66    0.44
   5  -6  -3    2.49    0.24
  -6  -5  -3    3.04    0.31
   6   5  -3    2.46    0.39
   6   5  -3    3.09    0.36
  -6  -5  -3    2.29    0.36
  -5   6  -3    2.89    0.42
  -6  -5  -3    1.90    0.33
   6   5   3    2.56    0.29
  -6  -5   3    1.92    0.34
   5  -6   3    2.78    0.25
   5  -6   3    2.52    0.40
  -6  -5   3    2.90    0.27
  -6  -5   3    3.06    0.37
   6   5   3    2.36    0.37
  -5   6   3    2.56    0.38
  -5   6   3    2.73    0.26
  -6  -4  -3    8.03    0.57
  -4   6  -3    7.45    0.40
   4  -6  -3    6.93    0.54
   4  -6  -3    9.13    0.68
  -6  -4  -3    8.04    0.56
  -4   6  -3    8.37    0.62
  -6  -4  -3    8.55    0.51
  -6  -4  -3    8.12    0.55
   6   4  -3    7.90    0.56
   4  -6  -3    7.22    0.40
   4  -6  -3   10.50    0.71
   6   4  -3    8.38    0.60
  -4   6  -3    7.97    0.60
  -6  -4   3    5.92    0.51
  -6  -4   3    7.58    0.45
  -4   6   3    6.79    0.54
  -6  -4   3    8.00    0.47
   6   4   3    7.22    0.56
  -6  -4   3    7.83    0.60
   6   4   3    8.19    0.49
   4  -6   3    7.53    0.41
   4  -6   3    6.22    0.53
   4  -6   3    8.85    0.62
   3  -6  -3    1.10    0.28
  -6  -3  -3    0.85    0.18
   3  -6  -3    0.70    0.12
   3  -6  -3    0.85    0.25
   3  -6  -3    0.85    0.22
  -3   6  -3    0.65    0.22
  -6  -3  -3    0.88    0.21
  -3   6  -3    0.91    0.23
   3  -6  -3    0.47    0.10
   6   3  -3    0.77    0.21
  -6  -3  -3    0.95    0.23
   6   3  -3    0.71    0.20
  -3   6  -3    0.71    0.12
   6   3   3    0.91    0.21
  -3   6   3    0.99    0.25
   3  -6   3    0.89    0.23
  -6  -3   3    0.83    0.15
   3  -6   3    0.82    0.13
  -6  -3   3    0.83    0.23
   6   3   3    1.12    0.19
  -6  -3   3    1.10    0.25
   3  -6   3    1.15    0.27
   6   3   3    1.01    0.24
  -6  -3   3    1.02    0.17
   6   2  -3    3.13    0.37
   2  -6  -3    3.20    0.21
  -2   6  -3    2.91    0.34
  -2   6  -3    3.86    0.39
   2  -6  -3    2.97    0.21
  -2   6  -3    3.55    0.22
   2  -6  -3    3.51    0.36
   2  -6  -3    4.46    0.42
  -6  -2  -3    4.19    0.39
  -6  -2  -3    3.95    0.30
  -6  -2  -3    3.26    0.34
   6   2  -3    4.23    0.45
  -6  -2   3    3.75    0.37
   2  -6   3    4.65    0.41
   6   2   3    3.82    0.39
   2  -6   3    3.63    0.37
  -6  -2   3    4.00    0.27
  -2   6   3    3.66    0.37
   6   2   3    4.00    0.36
  -2   6   3    4.21    0.42
   6   2   3    3.99    0.29
  -6  -2   3    4.69    0.41
   1  -6  -3    1.74    0.31
  -6  -1  -3    1.53    0.19
  -6  -1  -3    1.40    0.26
   6   1  -3    1.38    0.16
   6   1  -3    1.29    0.26
   6   1  -3    1.95    0.34
  -1   6  -3    1.17    0.24
   1  -6  -3    1.32    0.13
  -6  -1  -3    1.69    0.30
  -1   6  -3    1.26    0.13
  -1   6  -3    1.69    0.32
   1  -6  -3    1.32    0.25
  -1   6  -3    1.05    0.14
  -6  -1   3    1.66    0.29
   6   1   3    1.11    0.24
   1  -6   3    1.58    0.28
  -1   6   3    1.33    0.27
   6   1   3    1.73    0.19
   1  -6   3    1.09    0.24
  -6  -1   3    1.59    0.28
  -1   6   3    1.76    0.30
   6   1   3    1.50    0.25
  -6  -1   3    1.36    0.16
  -1   6   3    1.50    0.14
   0   6  -3    0.66    0.12
  -6   0  -3    0.48    0.16
   0  -6  -3    0.79    0.21
   0   6  -3    0.81    0.23
   0  -6  -3    0.94    0.13
   6   0  -3    0.78    0.23
   0  -6  -3    0.74    0.20
   0   6  -3    0.59    0.12
  -6   0  -3    0.79    0.17
   0   6  -3    0.76    0.21
  -6   0  -3    1.09    0.25
   6   0  -3    0.60    0.12
   6   0  -3    1.27    0.28
   6   0   3    0.77    0.17
   0  -6   3    0.91    0.23
  -6   0   3    1.34    0.27
   0   6   3    0.74    0.20
   6   0   3    0.93    0.24
   6   0   3    0.78    0.16
   0   6   3    0.65    0.12
  -6   0   3    0.70    0.21
  -6   0   3    0.67    0.14
   1   6  -3    1.23    0.17
   1   6  -3    1.77    0.28
  -1  -6  -3    1.64    0.18
   1   6  -3    1.15    0.24
   6  -1  -3    1.42    0.33
  -1  -6  -3    1.63    0.28
   6  -1  -3    1.33    0.19
  -6   1  -3    1.92    0.23
  -6   1  -3    1.58    0.27
  -1  -6  -3    1.52    0.26
   6  -1  -3    1.61    0.27
   1   6   3    1.46    0.28
   1   6   3    1.20    0.25
   6  -1   3    1.40    0.22
  -1  -6   3    1.21    0.18
  -6   1   3    1.26    0.20
  -1  -6   3    1.44    0.27
   6  -1   3    1.71    0.31
   1   6   3    1.30    0.18
   6  -1   3    1.62    0.28
  -6   1   3    1.44    0.28
  -1  -6   3    1.15    0.22
   6  -2  -3    3.31    0.29
  -2  -6  -3    4.18    0.36
  -2  -6  -3    3.85    0.30
  -6   2  -3    3.80    0.35
   6  -2  -3    3.23    0.34
   2   6  -3    3.79    0.39
   2   6  -3    4.67    0.37
   6  -2  -3    4.15    0.42
  -6   2  -3    3.57    0.36
  -2  -6  -3    3.91    0.36
   2   6  -3    3.90    0.31
  -6   2   3    3.50    0.30
   2   6   3    4.37    0.33
   6  -2   3    4.87    0.38
  -2  -6   3    3.73    0.38
   2   6   3    3.55    0.37
   6  -2   3    3.60    0.35
   6  -2   3    3.75    0.36
   2   6   3    3.98    0.37
  -6   2   3    3.62    0.40
  -2  -6   3    3.41    0.33
  -2  -6   3    3.77    0.31
   6  -2   3    4.17    0.35
  -6   2   3    3.44    0.34
   3   6  -3    1.16    0.26
   3   6  -3    0.93    0.20
  -3  -6  -3    0.90    0.20
  -6   3  -3    0.68    0.17
  -3  -6  -3    1.14    0.25
   3   6  -3    1.09    0.23
   6  -3  -3    0.79    0.19
  -6   3  -3    1.06    0.25
   6  -3  -3    0.78    0.19
   6  -3  -3    1.22    0.29
  -3  -6  -3    0.97    0.20
  -6   3   3    0.84    0.27
   6  -3   3    1.01    0.22
   6  -3   3    1.03    0.21
   3   6   3    0.95    0.21
   6  -3   3    0.91    0.21
  -3  -6   3    0.54    0.17
  -6   3   3    0.82    0.18
  -6   3   3    0.55    0.18
   6  -3   3    0.43    0.17
  -3  -6   3    0.87    0.19
   3   6   3    1.07    0.20
   3   6   3    0.88    0.23
  -3  -6   3    0.70    0.22
  -6   4  -3    6.81    0.54
  -4  -6  -3    7.84    0.56
   6  -4  -3    9.29    0.68
   4   6  -3    8.00    0.53
  -6   4  -3    7.04    0.48
  -4  -6  -3    7.62    0.53
   4   6  -3    7.08    0.53
   6  -4  -3    7.14    0.49
   4   6  -3    7.23    0.56
   6  -4   3    7.69    0.55
   6  -4   3    8.77    0.54
   6  -4   3    8.27    0.67
   6  -4   3    9.01    0.60
  -4  -6   3    7.51    0.49
   4   6   3    8.34    0.61
  -4  -6   3    8.12    0.60
  -6   4   3    6.95    0.49
  -6   4   3    9.34    0.68
   4   6   3    9.02    0.56
  -6   4   3    7.52    0.52
   4   6   3    8.06    0.55
   5   6  -3    3.17    0.37
   5   6  -3    3.05    0.33
  -5  -6  -3    2.23    0.33
  -5  -6  -3    2.34    0.34
  -5  -6  -3    2.85    0.40
   5   6  -3    2.29    0.35
  -6   5  -3    2.26    0.38
   6  -5  -3    2.95    0.40
   6  -5  -3    2.52    0.36
   6  -5  -3    2.90    0.45
  -6   5  -3    2.77    0.29
  -6   5   3    1.97    0.28
   6  -5   3    3.02    0.36
  -5  -6   3    2.61    0.29
   6  -5   3    2.27    0.34
   5   6   3    3.07    0.31
  -5  -6   3    3.13    0.39
  -5  -6   3    2.52    0.38
  -6   5   3    2.26    0.35
   6  -5   3    3.30    0.40
   5   6   3    2.49    0.39
  -6  -6  -3    4.45    0.44
  -6   6  -3    3.91    0.34
  -6   6  -3    4.12    0.45
   6  -6  -3    4.03    0.33
  -6  -6  -3    5.56    0.46
   6  -6  -3    5.02    0.54
   6   6  -3    4.63    0.40
   6   6  -3    4.00    0.44
   6  -6   3    5.80    0.52
   6  -6   3    3.88    0.33
   6   6   3    4.33    0.45
  -6   6   3    3.58    0.33
  -6  -6   3    4.71    0.49
  -6   6   3    4.26    0.43
  -6  -6   3    4.49    0.37
   6   6   3    4.66    0.48
   7   6  -3    1.21    0.34
  -6   7  -3    1.28    0.23
  -6   7  -3    1.27    0.34
   6  -7  -3    1.32    0.21
   6  -7  -3    1.23    0.33
  -7  -6  -3    1.21    0.29
  -7  -6  -3    1.07    0.26
   6  -7   3    1.40    0.36
  -7  -6   3    1.15    0.25
   6  -7   3    1.13    0.20
   7   6   3    1.17    0.25
  -6   7   3    1.16    0.22
   7   6   3    1.10    0.33
  -7  -6   3    1.13    0.24
  -6   7   3    1.40    0.33
  -7  -6   3    1.72    0.37
   7   5  -3    0.64    0.22
  -7  -5  -3    1.27    0.28
  -5   7  -3    1.36    0.31
  -5   7  -3    1.07    0.17
   5  -7  -3    1.67    0.39
   5  -7  -3    1.19    0.18
  -7  -5  -3    1.29    0.26
  -5   7   3    0.88    0.16
   7   5   3    1.59    0.35
   5  -7   3    1.28    0.19
  -7  -5   3    1.35    0.23
   5  -7   3    1.55    0.34
   7   5   3    1.34    0.25
  -5   7   3    0.75    0.26
  -7  -5   3    1.03    0.27
  -7  -5   3    1.11    0.23
   4  -7  -3    4.14    0.47
   7   4  -3    3.60    0.39
  -4   7  -3    3.35    0.23
  -7  -4  -3    3.27    0.36
  -4   7  -3    3.42    0.39
   4  -7  -3    2.77    0.22
   7   4  -3    2.62    0.42
   4  -7  -3    3.03    0.22
  -7  -4  -3    3.91    0.39
  -7  -4  -3    3.29    0.33
  -4   7   3    3.01    0.44
   7   4   3    3.09    0.45
  -7  -4   3    3.66    0.42
   7   4   3    3.82    0.34
   4  -7   3    3.48    0.41
  -7  -4   3    3.29    0.30
  -7  -4   3    3.79    0.30
   4  -7   3    3.08    0.23
   7   3  -3    1.54    0.34
  -7  -3  -3    1.49    0.28
   3  -7  -3    1.33    0.13
  -3   7  -3    1.64    0.14
  -3   7  -3    2.00    0.34
   3  -7  -3    1.69    0.14
   7   3  -3    1.81    0.32
  -7  -3  -3    1.47    0.24
   3  -7  -3    1.70    0.35
   3  -7   3    1.16    0.14
   7   3   3    1.32    0.33
  -7  -3   3    1.65    0.22
   3  -7   3    1.86    0.34
  -7  -3   3    1.76    0.20
   7   3   3    1.46    0.29
  -3   7   3    1.81    0.34
  -7  -3   3    1.97    0.35
   7   3   3    1.34    0.22
  -2   7  -3    4.73    0.47
   2  -7  -3    3.81    0.21
   7   2  -3    4.19    0.30
   2  -7  -3    4.28    0.45
   7   2  -3    3.49    0.41
  -2   7  -3    3.91    0.41
  -2   7  -3    3.75    0.21
  -7  -2  -3    3.48    0.37
   2  -7  -3    3.56    0.21
  -7  -2  -3    3.75    0.44
  -7  -2  -3    4.07    0.34
   7   2  -3    4.82    0.43
   2  -7  -3    3.79    0.40
  -2   7  -3    3.53    0.21
   7   2   3    4.61    0.33
   2  -7   3    4.85    0.46
   2  -7   3    3.91    0.41
  -2   7   3    3.50    0.40
  -7  -2   3    3.31    0.47
   7   2   3    4.52    0.40
  -7  -2   3    4.00    0.30
   7   2   3    4.87    0.47
  -2   7   3    5.37    0.49
  -7  -2   3    4.07    0.42
  -1   7  -3    2.26    0.38
  -7  -1  -3    2.47    0.26
   7   1  -3    2.22    0.37
  -1   7  -3    1.97    0.17
  -7  -1  -3    1.65    0.31
  -1   7  -3    1.85    0.16
   7   1  -3    2.29    0.21
  -1   7  -3    1.59    0.30
   1  -7  -3    2.09    0.16
   1  -7  -3    2.19    0.35
   1  -7  -3    2.19    0.36
   7   1  -3    2.97    0.35
  -7  -1  -3    2.49    0.35
  -7  -1   3    1.29    0.28
  -7  -1   3    2.12    0.22
  -1   7   3    1.68    0.16
   1  -7   3    1.53    0.29
   7   1   3    1.90    0.34
   7   1   3    1.94    0.29
  -7  -1   3    2.38    0.39
   1  -7   3    2.46    0.37
  -1   7   3    2.22    0.38
  -1   7   3    1.73    0.33
   7   1   3    2.22    0.23
   0   7  -3   -0.07    0.15
   0   7  -3   -0.01    0.12
   0   7  -3    0.07    0.07
  -7   0  -3   -0.08    0.10
   0  -7  -3    0.05    0.12
   0  -7  -3   -0.02    0.06
   7   0  -3    0.47    0.22
   0  -7  -3   -0.02    0.13
  -7   0  -3   -0.09    0.12
   0   7  -3   -0.07    0.08
   7   0  -3   -0.02    0.08
   7   0  -3    0.13    0.12
  -7   0  -3    0.07    0.14
   0   7   3    0.10    0.08
   0  -7   3   -0.03    0.12
   0   7   3    0.36    0.19
   7   0   3   -0.07    0.13
   7   0   3    0.11    0.15
   0   7   3    0.02    0.14
  -7   0   3    0.25    0.17
  -7   0   3    0.29    0.17
   0  -7   3    0.09    0.14
  -7   0   3    0.01    0.10
   7   0   3    0.05    0.11
   1   7  -3    1.66    0.29
  -1  -7  -3    1.73    0.20
  -1  -7  -3    1.95    0.33
  -7   1  -3    2.27    0.34
  -1  -7  -3    1.76    0.32
   1   7  -3    2.12    0.37
   1   7  -3    1.83    0.21
   7  -1  -3    1.91    0.33
  -7   1  -3    2.67    0.30
  -7   1  -3    1.27    0.26
   7  -1  -3    1.60    0.24
   7  -1  -3    2.05    0.34
   1   7   3    2.19    0.35
  -1  -7   3    2.12    0.35
  -7   1   3    1.46    0.28
   7  -1   3    1.91    0.31
  -7   1   3    2.22    0.39
   1   7   3    2.41    0.39
  -7   1   3    1.95    0.23
   7  -1   3    2.66    0.28
   7  -1   3    1.64    0.30
  -1  -7   3    2.07    0.33
   1   7   3    2.43    0.23
  -1  -7   3    1.94    0.22
   2   7  -3    4.46    0.41
   7  -2  -3    4.68    0.47
   2   7  -3    4.15    0.33
  -7   2  -3    4.55    0.41
  -7   2  -3    3.48    0.37
   7  -2  -3    3.77    0.33
  -2  -7  -3    4.27    0.33
   7  -2  -3    4.09    0.39
  -2  -7  -3    4.64    0.42
   2   7  -3    4.35    0.44
  -2  -7  -3    4.99    0.42
   7  -2   3    4.60    0.40
   2   7   3    3.70    0.39
  -2  -7   3    3.52    0.35
  -2  -7   3    3.58    0.41
   2   7   3    4.18    0.43
   2   7   3    4.57    0.34
  -7   2   3    4.02    0.44
   7  -2   3    4.57    0.43
  -7   2   3    3.26    0.37
  -7   2   3    3.63    0.37
  -2  -7   3    4.04    0.34
   7  -2   3    4.33    0.38
  -3  -7  -3    2.17    0.32
   7  -3  -3    1.60    0.33
  -7   3  -3    1.32    0.24
  -3  -7  -3    1.41    0.26
   3   7  -3    1.15    0.25
   7  -3  -3    1.32    0.25
   7  -3  -3    1.48    0.29
   3   7  -3    1.58    0.25
  -7   3  -3    1.00    0.26
   3   7   3    1.76    0.32
  -7   3   3    1.68    0.35
   3   7   3    1.61    0.29
   7  -3   3    1.35    0.27
   7  -3   3    2.08    0.33
   7  -3   3    2.15    0.38
  -3  -7   3    1.42    0.25
   3   7   3    1.15    0.22
   7  -3   3    1.80    0.29
  -7   3   3    1.82    0.28
  -7   3   3    1.90    0.30
  -3  -7   3    2.13    0.29
  -3  -7   3    1.77    0.34
   4   7  -3    4.06    0.38
   7  -4  -3    3.68    0.36
  -7   4  -3    2.66    0.36
   7  -4  -3    2.48    0.36
  -7   4  -3    2.74    0.41
  -4  -7  -3    3.90    0.38
   4   7  -3    3.92    0.39
  -4  -7  -3    3.32    0.35
  -7   4   3    2.54    0.31
  -7   4   3    3.81    0.47
   7  -4   3    3.45    0.40
   7  -4   3    3.31    0.35
  -7   4   3    2.99    0.33
  -4  -7   3    3.11    0.33
   4   7   3    3.77    0.37
   7  -4   3    3.85    0.40
   4   7   3    3.45    0.38
  -4  -7   3    3.61    0.42
   4   7   3    2.44    0.39
  -4  -7   3    2.70    0.36
  -5  -7  -3    0.66    0.22
   5   7  -3    0.69    0.24
   7  -5  -3    0.85    0.23
   5   7  -3    1.19    0.27
  -7   5  -3    1.05    0.28
  -5  -7  -3    1.26    0.27
  -7   5  -3    1.08    0.25
   7  -5  -3    1.20    0.25
   5   7   3    1.43    0.29
  -7   5   3    0.66    0.19
   7  -5   3    1.21    0.25
  -5  -7   3    1.57    0.27
   7  -5   3    1.21    0.30
  -5  -7   3    1.26    0.31
   5   7   3    0.98    0.27
  -5  -7   3    1.09    0.29
   5   7   3    1.29    0.29
   7  -5   3    1.60    0.34
  -7   5   3    1.02    0.24
  -7   6  -3    1.15    0.23
  -6  -7  -3    0.85    0.26
   7  -6  -3    1.24    0.25
  -6  -7  -3    1.20    0.31
   6   7  -3    1.37    0.33
  -7   6  -3    1.09    0.30
   7  -6  -3    1.39    0.38
   6   7  -3    1.30    0.29
  -7   6   3    1.12    0.25
  -7   6   3    1.16    0.29
  -6  -7   3    1.28    0.33
   6   7   3    0.86    0.27
   7  -6   3    0.75    0.26
  -6  -7   3    0.97    0.24
   6   7   3    1.46    0.30
   7  -6   3    0.94    0.22
  -7   7  -3   19.23    1.18
   7   7  -3   24.04    1.27
  -7  -7  -3   23.30    1.16
  -7   7  -3   18.92    0.98
   7  -7  -3   23.21    1.36
   7  -7  -3   21.49    1.00
  -7  -7  -3   23.39    1.24
   7   7   3   24.24    1.15
  -7  -7   3   23.73    1.28
  -7  -7   3   21.40    1.06
  -7   7   3   17.33    0.97
   7  -7   3   20.97    1.01
   7  -7   3   24.57    1.30
   7   7   3   21.40    1.22
  -7   7   3   20.84    1.17
  -8  -7  -3    1.08    0.32
  -7   8  -3    1.41    0.24
   7  -8  -3    1.23    0.41
   8   7  -3    0.86    0.28
  -8  -7  -3    1.52    0.32
  -7   8  -3    1.21    0.34
   7  -8   3    1.21    0.34
  -8  -7   3    0.96    0.26
   8   7   3    0.69    0.25
  -8  -7   3    0.70    0.30
  -7   8   3    0.93    0.31
  -8  -7   3    0.89    0.24
  -7   8   3    0.73    0.19
   8   7   3    0.81    0.32
  -8  -6  -3    0.07    0.15
  -6   8  -3   -0.07    0.17
   8   6  -3   -0.32    0.20
  -6   8  -3    0.00    0.12
  -8  -6  -3   -0.03    0.16
   6  -8  -3    0.11    0.11
   6  -8  -3   -0.22    0.16
  -8  -6   3    0.05    0.16
   6  -8   3   -0.06    0.10
  -8  -6   3   -0.10    0.17
  -8  -6   3    0.00    0.15
   8   6   3   -0.10    0.20
   8   6   3    0.08    0.17
  -6   8   3    0.17    0.13
   6  -8   3    0.17    0.22
  -6   8   3   -0.07    0.18
  -8  -5  -3    1.46    0.31
   5  -8  -3    1.65    0.41
   8   5  -3    1.59    0.41
  -5   8  -3    1.94    0.19
  -5   8  -3    1.36    0.36
   5  -8  -3    2.03    0.19
  -8  -5  -3    2.23    0.33
   5  -8  -3    1.70    0.19
   8   5   3    1.68    0.42
  -5   8   3    2.23    0.41
   5  -8   3    2.09    0.39
   5  -8   3    1.76    0.19
  -8  -5   3    2.55    0.45
  -8  -5   3    1.92    0.28
   8   5   3    1.99    0.29
  -8  -5   3    2.06    0.30
   4  -8  -3    0.38    0.26
  -8  -4  -3    0.13    0.14
  -8  -4  -3    0.52    0.18
   4  -8  -3    0.14    0.08
  -4   8  -3    0.18    0.19
   4  -8  -3    0.26    0.08
   8   4  -3    0.38    0.23
  -4   8  -3    0.11    0.08
   4  -8   3    0.18    0.08
  -8  -4   3    0.23    0.12
  -8  -4   3    0.45    0.23
   8   4   3    0.30    0.16
  -8  -4   3    0.17    0.12
  -4   8   3   -0.01    0.15
   4  -8   3    0.08    0.19
   8   4   3   -0.17    0.17
   8   3  -3    5.51    0.56
  -3   8  -3    5.33    0.52
  -8  -3  -3    4.59    0.44
  -8  -3  -3    4.74    0.40
   3  -8  -3    5.42    0.55
   8   3   3    4.63    0.44
  -3   8   3    5.03    0.51
  -8  -3   3    4.90    0.36
  -8  -3   3    4.75    0.37
  -8  -3   3    4.91    0.50
   3  -8   3    5.54    0.52
   8   3   3    4.77    0.52
   8   3   3    5.33    0.40
   8   2  -3    6.31    0.58
  -2   8  -3    7.76    0.60
  -8  -2  -3    6.86    0.54
   8   2  -3    7.54    0.57
   2  -8  -3    8.24    0.65
   8   2  -3    7.50    0.45
  -2   8   3    7.12    0.59
   2  -8   3    7.27    0.62
  -8  -2   3    7.69    0.63
  -8  -2   3    5.62    0.41
   8   2   3    6.67    0.59
   8   2   3    7.21    0.46
   8   2   3    6.35    0.52
  -1   8  -3    0.83    0.26
   8   1  -3    0.70    0.22
   1  -8  -3    0.75    0.10
   8   1  -3    0.44    0.20
  -8  -1  -3    0.29    0.18
   1  -8  -3    0.93    0.27
  -1   8  -3    0.66    0.10
  -1   8  -3    0.94    0.12
   8   1  -3    0.55    0.15
   1  -8   3    1.00    0.26
  -1   8   3    0.70    0.10
  -8  -1   3    1.01    0.28
  -1   8   3    0.43    0.20
  -8  -1   3    0.78    0.18
   8   1   3    0.68    0.21
   8   1   3    0.85    0.26
   8   1   3    0.68    0.18
  -8   0  -3    1.60    0.29
   8   0  -3    1.42    0.22
   0   8  -3    1.22    0.17
  -8   0  -3    1.49    0.31
   8   0  -3    1.20    0.26
   0   8  -3    1.48    0.16
   0  -8  -3    1.60    0.16
   8   0  -3    1.68    0.35
   0   8  -3    1.61    0.33
   0  -8  -3    1.77    0.35
   0  -8   3    1.87    0.36
   8   0   3    1.41    0.33
   0   8   3    1.50    0.17
   8   0   3    1.49    0.28
   0   8   3    1.84    0.35
  -8   0   3    1.60    0.36
  -8   0   3    1.37    0.22
   8   0   3    1.76    0.27
   1   8  -3    0.77    0.24
  -8   1  -3    0.65    0.22
  -8   1  -3    0.98    0.24
   8  -1  -3    1.02    0.29
   1   8  -3    0.73    0.15
   8  -1  -3    0.94    0.27
   8  -1  -3    0.53    0.15
  -1  -8  -3    0.72    0.25
  -1  -8  -3    0.67    0.15
   8  -1   3    0.91    0.23
  -8   1   3    0.61    0.25
  -1  -8   3    0.54    0.15
   1   8   3    0.56    0.14
   8  -1   3    0.53    0.19
   1   8   3    0.49    0.22
  -1  -8   3    0.82    0.24
  -8   1   3    0.72    0.18
   8  -1   3    0.58    0.22
   8  -2  -3    5.86    0.52
  -2  -8  -3    6.56    0.42
  -8   2  -3    6.79    0.55
  -8   2  -3    6.75    0.53
  -2  -8  -3    7.12    0.56
   2   8  -3    6.66    0.56
   2   8  -3    6.00    0.44
  -8   2  -3    6.09    0.51
   8  -2  -3    6.38    0.46
   2   8   3    7.13    0.46
  -2  -8   3    6.17    0.52
  -8   2   3    6.46    0.48
   2   8   3    7.73    0.61
  -2  -8   3    7.88    0.61
  -8   2   3    7.92    0.64
  -2  -8   3    5.03    0.41
   8  -2   3    7.98    0.63
   8  -2   3    6.63    0.55
  -8   2   3    6.02    0.54
   2   8   3    8.04    0.63
  -3  -8  -3    5.35    0.48
  -8   3  -3    4.50    0.44
   8  -3  -3    5.06    0.47
  -8   3  -3    4.21    0.45
   3   8  -3    4.88    0.46
   8  -3  -3    4.32    0.39
   3   8  -3    5.25    0.42
  -3  -8   3    4.39    0.39
   8  -3   3    5.59    0.49
   3   8   3    4.85    0.42
   8  -3   3    5.45    0.48
   3   8   3    4.83    0.52
   8  -3   3    4.86    0.46
  -3  -8   3    4.89    0.51
  -8   3   3    5.10    0.43
  -3  -8   3    5.18    0.45
   3   8   3    5.54    0.50
  -8   3   3    6.02    0.58
  -8   3   3    3.94    0.43
   4   8  -3    0.37    0.17
  -8   4  -3    0.28    0.19
   8  -4  -3    0.24    0.17
   8  -4  -3    0.02    0.16
  -4  -8  -3   -0.04    0.16
  -4  -8  -3    0.04    0.16
   4   8  -3    0.05    0.16
  -8   4  -3   -0.11    0.16
   4   8   3    0.11    0.18
  -4  -8   3    0.14    0.16
   4   8   3    0.12    0.15
   4   8   3   -0.11    0.17
  -8   4   3    0.41    0.22
   8  -4   3    0.04    0.17
  -4  -8   3    0.07    0.16
   8  -4   3    0.07    0.15
  -8   4   3    0.10    0.15
   8  -4   3   -0.06    0.19
  -4  -8   3    0.22    0.15
  -8   4   3    0.35    0.20
   8  -5  -3    1.87    0.34
   5   8  -3    2.13    0.38
  -5  -8  -3    1.84    0.35
  -8   5  -3    1.51    0.34
  -8   5  -3    1.57    0.27
  -5  -8  -3    1.60    0.29
   5   8  -3    1.90    0.35
  -8   5   3    2.05    0.43
   5   8   3    1.86    0.39
  -8   5   3    1.72    0.33
   8  -5   3    2.05    0.39
  -5  -8   3    1.49    0.35
   5   8   3    1.67    0.33
  -8   5   3    1.61    0.29
  -5  -8   3    1.52    0.29
   8  -5   3    1.56    0.31
  -5  -8   3    1.27    0.27
   8  -6  -3    0.00    0.17
   8  -6  -3    0.15    0.23
  -8   6  -3    0.15    0.19
  -8   6  -3    0.09    0.24
   6   8  -3   -0.20    0.14
   6   8  -3   -0.08    0.19
  -6  -8  -3   -0.03    0.17
   6   8   3    0.48    0.23
   8  -6   3   -0.04    0.17
  -6  -8   3    0.10    0.19
   6   8   3   -0.06    0.17
   8  -6   3    0.05    0.16
  -8   6   3    0.14    0.19
  -6  -8   3    0.15    0.17
  -8   6   3    0.02    0.19
   7   8  -3    0.92    0.34
  -8   7  -3    0.47    0.28
   8  -7  -3    0.98    0.25
  -7  -8  -3    0.61    0.28
  -8   7  -3    0.69    0.23
   7   8  -3    1.28    0.31
   8  -7  -3    0.86    0.34
  -7  -8  -3    0.75    0.25
  -8   7   3    1.39    0.32
   8  -7   3    1.46    0.37
   8  -7   3    1.22    0.26
  -7  -8   3    1.68    0.42
  -8   7   3    1.41    0.29
   7   8   3    1.50    0.37
  -8   8  -3    1.11    0.25
   8  -8  -3    1.14    0.25
   8  -8  -3    1.40    0.43
  -8  -8  -3    0.86    0.29
   8   8  -3    0.62    0.30
  -8   8  -3    0.43    0.24
  -8  -8  -3    1.55    0.35
   8  -8   3    0.94    0.23
  -8  -8   3    1.10    0.29
  -8  -8   3    0.84    0.35
   8   8   3    1.52    0.39
  -8   8   3    1.20    0.34
   8  -8   3    1.39    0.39
  -8   8   3    0.89    0.26
  -8   9  -3    0.05    0.19
   8  -9  -3    0.14    0.18
   9   8  -3    0.62    0.36
  -9  -8  -3    0.31    0.28
  -8   9  -3    0.07    0.25
   8  -9  -3    0.70    0.32
  -9  -8  -3    0.47    0.26
  -9  -8   3    0.72    0.28
  -8   9   3   -0.06    0.17
   8  -9   3    0.01    0.16
  -9  -8   3    0.43    0.32
   8  -9   3    0.94    0.33
   9   8   3    0.16    0.31
  -8   9   3    0.39    0.28
  -7   9  -3    3.43    0.59
   9   7  -3    3.68    0.82
  -7   9  -3    2.55    0.29
   7  -9  -3    2.93    0.29
   7  -9  -3    3.60    0.59
  -9  -7  -3    3.82    0.57
  -9  -7  -3    3.86    0.46
  -9  -7   3    2.51    0.39
   7  -9   3    4.63    0.74
  -9  -7   3    3.37    0.40
  -7   9   3    2.77    0.58
  -7   9   3    2.91    0.30
  -9  -7   3    4.08    0.62
   7  -9   3    3.60    0.32
   9   7   3    2.22    0.53
   6  -9  -3    7.42    0.41
  -6   9  -3    6.98    0.41
  -9  -6  -3    7.00    0.63
  -9  -6  -3    8.05    0.62
   9   6  -3    7.43    0.74
   6  -9  -3    6.78    0.41
  -9  -6   3    7.51    0.56
  -6   9   3    8.80    0.72
   6  -9   3    9.13    0.76
  -9  -6   3    7.75    0.54
   9   6   3    7.65    0.59
   6  -9   3    7.69    0.43
  -9  -6   3    8.79    0.75
   9   6   3    7.59    0.72
  -5   9  -3    8.39    0.74
   9   5  -3   10.22    0.82
   5  -9  -3    8.61    0.42
  -9  -5  -3   10.14    0.75
   5  -9  -3    8.95    0.43
  -5   9  -3    9.04    0.43
   5  -9  -3   11.38    0.90
  -9  -5  -3   10.24    0.68
   5  -9   3   11.80    0.85
   9   5   3   11.22    0.68
  -9  -5   3    9.87    0.62
  -9  -5   3   10.80    0.62
  -9  -5   3   11.73    0.84
  -5   9   3    9.43    0.76
   9   5   3   11.63    0.86
   5  -9   3    9.25    0.44
   9   4  -3    2.15    0.45
   4  -9  -3    3.06    0.50
  -4   9  -3    1.87    0.39
  -9  -4  -3    2.27    0.40
  -9  -4  -3    2.39    0.35
  -9  -4   3    2.34    0.43
  -9  -4   3    1.73    0.29
   4  -9   3    1.47    0.37
  -4   9   3    1.93    0.39
   9   4   3    2.12    0.32
  -9  -4   3    2.04    0.30
   9   4   3    1.86    0.43
  -9  -3  -3    1.87    0.35
   9   3  -3    3.48    0.54
   3  -9  -3    3.18    0.53
  -9  -3  -3    2.84    0.34
  -3   9  -3    2.21    0.42
  -9  -3   3    2.04    0.28
  -9  -3   3    2.60    0.29
  -9  -3   3    2.54    0.46
   3  -9   3    2.73    0.45
  -3   9   3    2.61    0.43
   9   3   3    2.51    0.35
   9   3   3    2.17    0.43
   9   2  -3    1.05    0.21
  -9  -2  -3    1.38    0.31
   9   2  -3    1.43    0.37
  -2   9  -3    1.41    0.35
  -9  -2  -3    1.06    0.24
   2  -9  -3    1.08    0.31
   9   2   3    1.28    0.36
  -2   9   3    1.07    0.33
  -9  -2   3    0.66    0.17
  -9  -2   3    1.24    0.33
   9   2   3    1.20    0.23
   2  -9   3    1.35    0.33
   9   1  -3    4.81    0.38
  -1   9  -3    5.04    0.52
  -9  -1  -3    4.84    0.46
   1  -9  -3    4.00    0.22
  -9  -1  -3    5.05    0.43
   1  -9  -3    4.96    0.52
  -1   9  -3    4.05    0.24
  -1   9  -3    4.05    0.23
   9   1  -3    5.48    0.56
   9   1   3    5.10    0.39
  -9  -1   3    4.51    0.49
   1  -9   3    4.45    0.49
   9   1   3    4.83    0.54
  -9  -1   3    4.27    0.36
  -1   9   3    4.92    0.52
   0  -9  -3    8.13    0.65
   0   9  -3    6.36    0.37
   0  -9  -3    6.07    0.35
   0   9  -3    6.12    0.37
   0   9  -3    7.58    0.62
  -9   0  -3    6.06    0.52
   9   0  -3    6.91    0.62
   9   0  -3    6.79    0.47
  -9   0  -3    8.02    0.56
   0   9   3    6.93    0.62
   0   9   3    6.78    0.38
  -9   0   3    8.24    0.67
   9   0   3    7.28    0.51
   9   0   3    6.62    0.62
  -9   0   3    6.62    0.46
   0  -9   3    8.30    0.66
  -1  -9  -3    4.53    0.48
   9  -1  -3    4.41    0.49
  -1  -9  -3    4.15    0.31
  -9   1  -3    3.23    0.40
   1   9  -3    4.15    0.32
   9  -1  -3    4.45    0.37
  -9   1  -3    5.60    0.48
   1   9  -3    3.77    0.45
   1   9   3    4.80    0.33
  -9   1   3    3.98    0.36
   9  -1   3    4.75    0.43
  -1  -9   3    3.86    0.46
   9  -1   3    5.30    0.53
  -9   1   3    5.55    0.56
   1   9   3    5.57    0.55
  -1  -9   3    3.86    0.32
  -2  -9  -3    0.97    0.28
  -9   2  -3    1.20    0.31
   2   9  -3    0.99    0.26
   9  -2  -3    1.28    0.32
  -9   2  -3    1.21    0.31
   2   9  -3    0.87    0.22
   9  -2  -3    0.81    0.21
  -2  -9  -3    0.77    0.19
  -2  -9   3    1.38    0.35
  -2  -9   3    0.95    0.21
   9  -2   3    1.54    0.29
   2   9   3    0.89    0.29
   2   9   3    1.22    0.23
  -9   2   3    1.08    0.24
  -9   2   3    1.81    0.39
   9  -2   3    1.17    0.32
  -3  -9  -3    1.98    0.31
  -3  -9  -3    2.46    0.41
   9  -3  -3    1.99    0.39
   3   9  -3    2.87    0.47
   3   9  -3    2.39    0.34
  -9   3  -3    1.82    0.34
   9  -3  -3    2.16    0.33
  -3  -9   3    2.59    0.35
   3   9   3    3.26    0.49
  -9   3   3    2.25    0.34
   3   9   3    2.34    0.35
  -3  -9   3    2.67    0.45
   9  -3   3    2.46    0.41
   9  -3   3    3.23    0.39
   9  -3   3    2.93    0.42
  -9   3   3    2.68    0.49
   9  -4  -3    2.05    0.36
   4   9  -3    2.10    0.34
  -9   4  -3    1.77    0.36
   4   9  -3    2.10    0.37
   9  -4  -3    1.42    0.33
[truncated: 1,847,477 more chars]
